# Supplementary material for: Characterization of a de novo assembled transcriptome of the Common Blackbird (Turdus merula)
Source: PeerJ. 2017 Dec 13;5:e4045. doi: 10.7717/peerj.4045 (PMC5732540; doi:10.7717/peerj.4045)
Supplement: Table S3 [file peerj-05-4045-s003.xlsx]

## Sheet: genelist heart
ContigName	ContigLength	topnrMatch	topnrEvalue	nobadwordnrMatch	nobadwordnrEvalue	Uniprotmatch	X._identity	evalue	ID	Description	KEGG	GO	GOCC	GOBP	GOMF	Keywords	X	logFC	logCPM	PValue	FDR	rcp557[, 2]	rcp558[, 2]	MeanCounts	Gene
Locus_1_Transcript_2/4_Confidence_0.700_Length_9592	9592	Locus_1_Transcript_2/4_Confidence_0.700_Length_9592	9592	Locus_1_Transcript_2/4_Confidence_0.700_Length_9592	9592	Q8NB14	75.405	0	UBP38_HUMAN	Ubiquitin carboxyl-terminal hydrolase 38	hsa:84640	GO:0004843 \\ GO:0016579 \\ GO:0006511 \\	protein deubiquitination (GO:0016579);ubiquitin-dependent protein catabolic process (GO:0006511);	thiol-dependent ubiquitin-specific protease activity (GO:0004843);	No_GOCC	3D-structure;Alternative splicing;Complete proteome;Hydrolase;Protease;Reference proteome;Thiol protease;Ubl conjugation pathway.;		-0.009524	5.79013	0.99185	1	1394	1507	1450.5	UBP38
Locus_10_Transcript_1/1_Confidence_1.000_Length_2691	2691	Locus_10_Transcript_1/1_Confidence_1.000_Length_2691	2691	Locus_10_Transcript_1/1_Confidence_1.000_Length_2691	2691	Q863B3	90	0	SND1_BOVIN	Staphylococcal nuclease domain-containing protein 1	bta:404098	GO:0097433 \\ GO:0070062 \\ GO:0042470 \\ GO:0016020 \\ GO:0005739 \\ GO:0005634 \\ GO:0016442 \\ GO:0004518 \\ GO:0044822 \\ GO:0031047 \\ GO:0001649 \\ GO:0006355 \\ GO:0006351 \\	gene silencing by RNA (GO:0031047);osteoblast differentiation (GO:0001649);regulation of transcription, DNA-templated (GO:0006355);transcription, DNA-templated (GO:0006351);	nuclease activity (GO:0004518);poly(A) RNA binding (GO:0044822);	dense body (GO:0097433);extracellular exosome (GO:0070062);melanosome (GO:0042470);membrane (GO:0016020);mitochondrion (GO:0005739);nucleus (GO:0005634);RISC complex (GO:0016442);	Acetylation;Complete proteome;Cytoplasm;Direct protein sequencing;Nucleus;Phosphoprotein;Reference proteome;Repeat;Transcription;Transcription regulation.;		-0.11886	5.82934	0.887654	1	1378	1607	1492.5	SND1
Locus_100_Transcript_5/5_Confidence_0.167_Length_661	661	Locus_100_Transcript_5/5_Confidence_0.167_Length_661	661	Locus_100_Transcript_5/5_Confidence_0.167_Length_661	661	P83242	70.93	6.98e-41	MSMB_STRCA	Beta-microseminoprotein	No_KEGG	GO:0005576 \\	No_GOBP	No_GOMF	extracellular region (GO:0005576);	Amidation;Direct protein sequencing;Disulfide bond;Secreted.;		-0.310511	0.0109859	0.80046	1	21	28	24.5	MSMB
Locus_1000_Transcript_1/4_Confidence_0.700_Length_3807	3807	Locus_1000_Transcript_1/4_Confidence_0.700_Length_3807	3807	Locus_1000_Transcript_1/4_Confidence_0.700_Length_3807	3807	Q91VC9	77.778	4.27e-111	GHITM_MOUSE	Growth hormone-inducible transmembrane protein	mmu:66092	GO:0070062 \\ GO:0016021 \\ GO:0005743 \\ GO:0005739 \\ GO:0006915 \\	apoptotic process (GO:0006915);	No_GOMF	extracellular exosome (GO:0070062);integral component of membrane (GO:0016021);mitochondrial inner membrane (GO:0005743);mitochondrion (GO:0005739);	Apoptosis;Complete proteome;Membrane;Mitochondrion;Mitochondrion inner membrane;Reference proteome;Transit peptide;Transmembrane;Transmembrane helix.;		-0.00300042	10.206	0.99717	1	29862	32137	30999.5	GHITM
Locus_10000_Transcript_1/4_Confidence_0.667_Length_436	436	Locus_10000_Transcript_1/4_Confidence_0.667_Length_436	436	Locus_10000_Transcript_1/4_Confidence_0.667_Length_436	436	P38552	65.957	6.69e-12	LEG4_RAT	Galectin-4	rno:25474	GO:0005615 \\ GO:0030246 \\ GO:0016936 \\	No_GOBP	carbohydrate binding (GO:0030246);galactoside binding (GO:0016936);	extracellular space (GO:0005615);	Complete proteome;Direct protein sequencing;Lectin;Phosphoprotein;Reference proteome;Repeat.;		-0.0872763	1.70259	0.936179	1	78	89	83.5	LEG4
Locus_10000_Transcript_3/4_Confidence_0.556_Length_567	567	Locus_10000_Transcript_3/4_Confidence_0.556_Length_567	567	Locus_10000_Transcript_3/4_Confidence_0.556_Length_567	567	Q3T0D6	57.037	1.42e-45	LEG4_BOVIN	Galectin-4	bta:614804	GO:0030246 \\	No_GOBP	carbohydrate binding (GO:0030246);	No_GOCC	Complete proteome;Lectin;Phosphoprotein;Reference proteome;Repeat.;		0.124126	3.70379	0.887338	1	342	337	339.5	LEG4
Locus_10001_Transcript_4/6_Confidence_0.643_Length_4319	4319	Locus_10001_Transcript_4/6_Confidence_0.643_Length_4319	4319	Locus_10001_Transcript_4/6_Confidence_0.643_Length_4319	4319	Q9Y223	92.105	0	GLCNE_HUMAN	Bifunctional UDP-N-acetylglucosamine 2-epimerase/N-acetylmannosamine kinase	hsa:10020	GO:0005737 \\ GO:0005829 \\ GO:0005524 \\ GO:0004553 \\ GO:0046872 \\ GO:0009384 \\ GO:0008761 \\ GO:0007155 \\ GO:0044267 \\ GO:0006488 \\ GO:0006045 \\ GO:0006054 \\ GO:0043687 \\ GO:0018279 \\ GO:0006047 \\	cell adhesion (GO:0007155);cellular protein metabolic process (GO:0044267);dolichol-linked oligosaccharide biosynthetic process (GO:0006488);N-acetylglucosamine biosynthetic process (GO:0006045);N-acetylneuraminate metabolic process (GO:0006054);post-translational protein modification (GO:0043687);protein N-linked glycosylation via asparagine (GO:0018279);UDP-N-acetylglucosamine metabolic process…	ATP binding (GO:0005524);hydrolase activity, hydrolyzing O-glycosyl compounds (GO:0004553);metal ion binding (GO:0046872);N-acylmannosamine kinase activity (GO:0009384);UDP-N-acetylglucosamine 2-epimerase activity (GO:0008761);	cytoplasm (GO:0005737);cytosol (GO:0005829);	3D-structure;Allosteric enzyme;Alternative splicing;ATP-binding;Complete proteome;Cytoplasm;Disease mutation;Hydrolase;Kinase;Metal-binding;Multifunctional enzyme;Nucleotide-binding;Phosphoprotein;Reference proteome;Transferase;Zinc.;		0.0361718	2.73776	0.97645	1	169	177	173	GLCNE
Locus_10003_Transcript_2/10_Confidence_0.345_Length_8245	8245	Locus_10003_Transcript_2/10_Confidence_0.345_Length_8245	8245	Locus_10003_Transcript_2/10_Confidence_0.345_Length_8245	8245	Q5HYC2	56.615	0	K2026_HUMAN	Uncharacterized protein KIAA2026	hsa:158358	No_GOcodes	No_GOBP	No_GOMF	No_GOCC	Alternative splicing;Complete proteome;Reference proteome.;		0.227959	1.18374	0.818718	1	60	55	57.5	K2026
Locus_10003_Transcript_4/10_Confidence_0.241_Length_2606	2606	Locus_10003_Transcript_4/10_Confidence_0.241_Length_2606	2606	Locus_10003_Transcript_4/10_Confidence_0.241_Length_2606	2606	Q5HYC2	65	0	K2026_HUMAN	Uncharacterized protein KIAA2026	hsa:158358	No_GOcodes	No_GOBP	No_GOMF	No_GOCC	Alternative splicing;Complete proteome;Reference proteome.;		-0.258627	0.37071	0.804215	1	28	36	32	K2026
Locus_10003_Transcript_6/10_Confidence_0.448_Length_8521	8521	Locus_10003_Transcript_6/10_Confidence_0.448_Length_8521	8521	Locus_10003_Transcript_6/10_Confidence_0.448_Length_8521	8521	Q5HYC2	51.453	0	K2026_HUMAN	Uncharacterized protein KIAA2026	hsa:158358	No_GOcodes	No_GOBP	No_GOMF	No_GOCC	Alternative splicing;Complete proteome;Reference proteome.;		-0.196211	1.19033	0.842383	1	52	64	58	K2026
Locus_10003_Transcript_7/10_Confidence_0.276_Length_2875	2875	Locus_10003_Transcript_7/10_Confidence_0.276_Length_2875	2875	Locus_10003_Transcript_7/10_Confidence_0.276_Length_2875	2875	Q5HYC2	67.141	0	K2026_HUMAN	Uncharacterized protein KIAA2026	hsa:158358	No_GOcodes	No_GOBP	No_GOMF	No_GOCC	Alternative splicing;Complete proteome;Reference proteome.;		-0.190115	0.473729	0.853272	1	31	38	34.5	K2026
Locus_10004_Transcript_1/2_Confidence_0.750_Length_2645	2645	Locus_10004_Transcript_1/2_Confidence_0.750_Length_2645	2645	Locus_10004_Transcript_1/2_Confidence_0.750_Length_2645	2645	P26818	93.895	0	ARBK2_BOVIN	Beta-adrenergic receptor kinase 2	bta:282136	GO:0005524 \\ GO:0047696 \\ GO:0004703 \\ GO:0007165 \\	signal transduction (GO:0007165);	ATP binding (GO:0005524);beta-adrenergic receptor kinase activity (GO:0047696);G-protein coupled receptor kinase activity (GO:0004703);	No_GOCC	ATP-binding;Complete proteome;Kinase;Nucleotide-binding;Reference proteome;Serine/threonine-protein kinase;Transferase;Ubl conjugation.;		0.102775	1.74687	0.922499	1	86	86	86	ARBK2
Locus_10005_Transcript_1/1_Confidence_1.000_Length_728	728	No_sig_nr_hit	No_sig_nr_hit	No_sig_nr_hit	No_sig_nr_hit	No_Uniprotmatch	No_%_identity	No_evalue	No_ID	No_Description	No_KEGG	No_GO	No_GOCC	No_GOBP	No_GOMF	No_keywords		0.635653	0.0198409	0.524465	1	29	20	24.5	No
Locus_10006_Transcript_1/2_Confidence_0.750_Length_1240	1240	Locus_10006_Transcript_1/2_Confidence_0.750_Length_1240	1240	Locus_10006_Transcript_1/2_Confidence_0.750_Length_1240	1240	Q2HJ48	96.887	0	KCTD1_BOVIN	BTB/POZ domain-containing protein KCTD1	bta:784587	GO:0005634 \\ GO:0003714 \\ GO:0045892 \\ GO:0051260 \\ GO:0006351 \\	negative regulation of transcription, DNA-templated (GO:0045892);protein homooligomerization (GO:0051260);transcription, DNA-templated (GO:0006351);	transcription corepressor activity (GO:0003714);	nucleus (GO:0005634);	Complete proteome;Nucleus;Phosphoprotein;Reference proteome;Repressor;Transcription;Transcription regulation;Ubl conjugation.;		-0.291332	-0.131656	0.834762	1	19	25	22	KCTD1
Locus_100085_Transcript_2/2_Confidence_0.875_Length_234	234	No_sig_nr_hit	No_sig_nr_hit	No_sig_nr_hit	No_sig_nr_hit	No_Uniprotmatch	No_%_identity	No_evalue	No_ID	No_Description	No_KEGG	No_GO	No_GOCC	No_GOBP	No_GOMF	No_keywords		0.254368	1.17189	0.794806	1	60	54	57	No
Locus_100087_Transcript_1/1_Confidence_0.800_Length_241	241	No_sig_nr_hit	No_sig_nr_hit	No_sig_nr_hit	No_sig_nr_hit	No_Uniprotmatch	No_%_identity	No_evalue	No_ID	No_Description	No_KEGG	No_GO	No_GOCC	No_GOBP	No_GOMF	No_keywords		0.786626	-0.034433	0.425624	1	29	18	23.5	No
Locus_1001_Transcript_1/3_Confidence_0.667_Length_2445	2445	Locus_1001_Transcript_1/3_Confidence_0.667_Length_2445	2445	Locus_1001_Transcript_1/3_Confidence_0.667_Length_2445	2445	P23588	80.788	5.58e-76	IF4B_HUMAN	Eukaryotic translation initiation factor 4B	No_KEGG	GO:0005829 \\ GO:0016281 \\ GO:0000166 \\ GO:0044822 \\ GO:0003723 \\ GO:0003743 \\ GO:0044267 \\ GO:0010467 \\ GO:0008286 \\ GO:0000288 \\ GO:0000289 \\ GO:0006446 \\ GO:0006412 \\ GO:0006413 \\	cellular protein metabolic process (GO:0044267);gene expression (GO:0010467);insulin receptor signaling pathway (GO:0008286);nuclear-transcribed mRNA catabolic process, deadenylation-dependent decay (GO:0000288);nuclear-transcribed mRNA poly(A) tail shortening (GO:0000289);regulation of translational initiation (GO:0006446);translation (GO:0006412);translational initiation (GO:0006413);	nucleotide binding (GO:0000166);poly(A) RNA binding (GO:0044822);RNA binding (GO:0003723);translation initiation factor activity (GO:0003743);	cytosol (GO:0005829);eukaryotic translation initiation factor 4F complex (GO:0016281);	3D-structure;Acetylation;Alternative splicing;Complete proteome;Direct protein sequencing;Initiation factor;Phosphoprotein;Polymorphism;Protein biosynthesis;Reference proteome;RNA-binding.;		0.0698566	7.73507	0.933419	1	5521	5649	5585	IF4B
Locus_1001_Transcript_2/3_Confidence_0.333_Length_1107	1107	No_sig_nr_hit	No_sig_nr_hit	No_sig_nr_hit	No_sig_nr_hit	No_Uniprotmatch	No_%_identity	No_evalue	No_ID	No_Description	No_KEGG	No_GO	No_GOCC	No_GOBP	No_GOMF	No_keywords		0.046136	3.54884	0.95963	1	299	311	305	No
Locus_10010_Transcript_1/5_Confidence_0.636_Length_1999	1999	Locus_10010_Transcript_1/5_Confidence_0.636_Length_1999	1999	Locus_10010_Transcript_1/5_Confidence_0.636_Length_1999	1999	Q9UGY1	65.285	2.04e-59	NOL12_HUMAN	Nucleolar protein 12	hsa:79159	GO:0005730 \\ GO:0044822 \\ GO:0019843 \\	No_GOBP	poly(A) RNA binding (GO:0044822);rRNA binding (GO:0019843);	nucleolus (GO:0005730);	Coiled coil;Complete proteome;Nucleus;Reference proteome;RNA-binding;rRNA-binding.;		0.319653	0.889761	0.72579	1	50	43	46.5	NOL12
Locus_10010_Transcript_2/5_Confidence_0.273_Length_1338	1338	Locus_10010_Transcript_2/5_Confidence_0.273_Length_1338	1338	Locus_10010_Transcript_2/5_Confidence_0.273_Length_1338	1338	Q5D1Z3	58.333	1.95e-14	NOL12_RAT	Nucleolar protein 12	rno:362955	GO:0005730 \\ GO:0005634 \\ GO:0003723 \\ GO:0019843 \\ GO:0003697 \\	No_GOBP	RNA binding (GO:0003723);rRNA binding (GO:0019843);single-stranded DNA binding (GO:0003697);	nucleolus (GO:0005730);nucleus (GO:0005634);	Coiled coil;Complete proteome;Nucleus;Reference proteome;RNA-binding;rRNA-binding.;		0.592812	0.632518	0.53283	1	45	32	38.5	NOL12
Locus_10010_Transcript_3/5_Confidence_0.636_Length_1868	1868	Locus_10010_Transcript_3/5_Confidence_0.636_Length_1868	1868	Locus_10010_Transcript_3/5_Confidence_0.636_Length_1868	1868	Q9UGY1	57.48	1.66e-40	NOL12_HUMAN	Nucleolar protein 12	hsa:79159	GO:0005730 \\ GO:0044822 \\ GO:0019843 \\	No_GOBP	poly(A) RNA binding (GO:0044822);rRNA binding (GO:0019843);	nucleolus (GO:0005730);	Coiled coil;Complete proteome;Nucleus;Reference proteome;RNA-binding;rRNA-binding.;		0.03723	0.809979	0.970607	1	43	45	44	NOL12
Locus_10010_Transcript_4/5_Confidence_0.182_Length_1480	1480	Locus_10010_Transcript_4/5_Confidence_0.182_Length_1480	1480	Locus_10010_Transcript_4/5_Confidence_0.182_Length_1480	1480	A0A099ZPQ6	90.909	2.95e-28	A0A099ZPQ6_TINGU	Nucleolar protein 12 {ECO:0000313|EMBL:KGL83792.1}	No_KEGG	GO:0016021 \\	No_GOBP	No_GOMF	integral component of membrane (GO:0016021);	Coiled coil {ECO:0000256|SAM:Coils};Complete proteome {ECO:0000313|Proteomes:UP000053641};Membrane {ECO:0000256|SAM:Phobius};Transmembrane {ECO:0000256|SAM:Phobius};Transmembrane helix {ECO:0000256|SAM:Phobius}.;		0.102536	0.416358	0.961607	1	33	33	33	A0A099ZPQ6
Locus_10010_Transcript_5/5_Confidence_0.636_Length_1917	1917	Locus_10010_Transcript_5/5_Confidence_0.636_Length_1917	1917	Locus_10010_Transcript_5/5_Confidence_0.636_Length_1917	1917	Q9UGY1	66.497	7.7e-65	NOL12_HUMAN	Nucleolar protein 12	hsa:79159	GO:0005730 \\ GO:0044822 \\ GO:0019843 \\	No_GOBP	poly(A) RNA binding (GO:0044822);rRNA binding (GO:0019843);	nucleolus (GO:0005730);	Coiled coil;Complete proteome;Nucleus;Reference proteome;RNA-binding;rRNA-binding.;		-0.188821	1.10376	0.85653	1	49	60	54.5	NOL12
Locus_10011_Transcript_1/1_Confidence_1.000_Length_1997	1997	Locus_10011_Transcript_1/1_Confidence_1.000_Length_1997	1997	Locus_10011_Transcript_1/1_Confidence_1.000_Length_1997	1997	Q8R4V2	62.445	6.12e-84	DUS15_MOUSE	Dual specificity protein phosphatase 15 {ECO:0000250|UniProtKB:Q9H1R2}	mmu:252864	GO:0004725 \\ GO:0008138 \\ GO:0046330 \\ GO:0042127 \\ GO:0007179 \\	positive regulation of JNK cascade (GO:0046330);regulation of cell proliferation (GO:0042127);transforming growth factor beta receptor signaling pathway (GO:0007179);	protein tyrosine phosphatase activity (GO:0004725);protein tyrosine/serine/threonine phosphatase activity (GO:0008138);	No_GOCC	Alternative splicing;Complete proteome;Hydrolase;Protein phosphatase;Reference proteome.;		-0.125131	4.04208	0.882266	1	397	465	431	DUS15
Locus_10015_Transcript_1/2_Confidence_0.750_Length_4927	4927	Locus_10015_Transcript_1/2_Confidence_0.750_Length_4927	4927	Locus_10015_Transcript_1/2_Confidence_0.750_Length_4927	4927	Q5T4D3	90.068	0	TMTC4_HUMAN	Transmembrane and TPR repeat-containing protein 4	hsa:84899	GO:0016021 \\	No_GOBP	No_GOMF	integral component of membrane (GO:0016021);	Alternative splicing;Complete proteome;Membrane;Polymorphism;Reference proteome;Repeat;TPR repeat;Transmembrane;Transmembrane helix.;		0.0853074	1.68806	0.935434	1	82	83	82.5	TMTC4
Locus_10016_Transcript_1/1_Confidence_1.000_Length_1005	1005	No_sig_nr_hit	No_sig_nr_hit	No_sig_nr_hit	No_sig_nr_hit	No_Uniprotmatch	No_%_identity	No_evalue	No_ID	No_Description	No_KEGG	No_GO	No_GOCC	No_GOBP	No_GOMF	No_keywords		-0.263096	0.790663	0.79184	1	38	49	43.5	No
Locus_10017_Transcript_1/1_Confidence_1.000_Length_1157	1157	No_sig_nr_hit	No_sig_nr_hit	No_sig_nr_hit	No_sig_nr_hit	No_Uniprotmatch	No_%_identity	No_evalue	No_ID	No_Description	No_KEGG	No_GO	No_GOCC	No_GOBP	No_GOMF	No_keywords		0.164813	3.01315	0.851538	1	214	205	209.5	No
Locus_10018_Transcript_4/7_Confidence_0.611_Length_4315	4315	Locus_10018_Transcript_4/7_Confidence_0.611_Length_4315	4315	Locus_10018_Transcript_4/7_Confidence_0.611_Length_4315	4315	Q9CSP9	72.028	0	TTC14_MOUSE	Tetratricopeptide repeat protein 14	mmu:67120	GO:0003676 \\	No_GOBP	nucleic acid binding (GO:0003676);	No_GOCC	Alternative splicing;Complete proteome;Phosphoprotein;Reference proteome;Repeat;TPR repeat.;		0.137072	1.71418	0.889165	1	85	83	84	TTC14
Locus_10018_Transcript_5/7_Confidence_0.556_Length_3304	3304	Locus_10018_Transcript_5/7_Confidence_0.556_Length_3304	3304	Locus_10018_Transcript_5/7_Confidence_0.556_Length_3304	3304	Q9CSP9	71.86	0	TTC14_MOUSE	Tetratricopeptide repeat protein 14	mmu:67120	GO:0003676 \\	No_GOBP	nucleic acid binding (GO:0003676);	No_GOCC	Alternative splicing;Complete proteome;Phosphoprotein;Reference proteome;Repeat;TPR repeat.;		0.0310947	1.96591	0.973309	1	98	103	100.5	TTC14
Locus_10018_Transcript_6/7_Confidence_0.667_Length_4782	4782	Locus_10018_Transcript_6/7_Confidence_0.667_Length_4782	4782	Locus_10018_Transcript_6/7_Confidence_0.667_Length_4782	4782	Q9CSP9	72.028	0	TTC14_MOUSE	Tetratricopeptide repeat protein 14	mmu:67120	GO:0003676 \\	No_GOBP	nucleic acid binding (GO:0003676);	No_GOCC	Alternative splicing;Complete proteome;Phosphoprotein;Reference proteome;Repeat;TPR repeat.;		-0.0519872	1.99257	0.973815	1	97	108	102.5	TTC14
Locus_10018_Transcript_7/7_Confidence_0.556_Length_2852	2852	Locus_10018_Transcript_7/7_Confidence_0.556_Length_2852	2852	Locus_10018_Transcript_7/7_Confidence_0.556_Length_2852	2852	Q9CSP9	71.86	0	TTC14_MOUSE	Tetratricopeptide repeat protein 14	mmu:67120	GO:0003676 \\	No_GOBP	nucleic acid binding (GO:0003676);	No_GOCC	Alternative splicing;Complete proteome;Phosphoprotein;Reference proteome;Repeat;TPR repeat.;		-0.233655	1.33816	0.815893	1	57	72	64.5	TTC14
Locus_1002_Transcript_1/3_Confidence_0.750_Length_4143	4143	Locus_1002_Transcript_1/3_Confidence_0.750_Length_4143	4143	Locus_1002_Transcript_1/3_Confidence_0.750_Length_4143	4143	Q5NDL3	89.72	0	EOGT_CHICK	EGF domain-specific O-linked N-acetylglucosamine transferase	gga:426961	GO:0005788 \\ GO:0016262 \\ GO:0006493 \\	protein O-linked glycosylation (GO:0006493);	protein N-acetylglucosaminyltransferase activity (GO:0016262);	endoplasmic reticulum lumen (GO:0005788);	Complete proteome;Endoplasmic reticulum;Glycoprotein;Glycosyltransferase;Reference proteome;Signal;Transferase.;		0.153329	4.38004	0.856642	1	553	534	543.5	EOGT
Locus_10020_Transcript_1/1_Confidence_1.000_Length_2515	2515	No_sig_nr_hit	No_sig_nr_hit	No_sig_nr_hit	No_sig_nr_hit	No_Uniprotmatch	No_%_identity	No_evalue	No_ID	No_Description	No_KEGG	No_GO	No_GOCC	No_GOBP	No_GOMF	No_keywords		0.399017	-0.666788	0.770753	1	16	13	14.5	No
Locus_100204_Transcript_1/1_Confidence_1.000_Length_267	267	No_sig_nr_hit	No_sig_nr_hit	No_sig_nr_hit	No_sig_nr_hit	No_Uniprotmatch	No_%_identity	No_evalue	No_ID	No_Description	No_KEGG	No_GO	No_GOCC	No_GOBP	No_GOMF	No_keywords		-0.216982	-0.761307	0.912874	1	12	15	13.5	No
Locus_100215_Transcript_1/1_Confidence_1.000_Length_356	356	No_sig_nr_hit	No_sig_nr_hit	No_sig_nr_hit	No_sig_nr_hit	No_Uniprotmatch	No_%_identity	No_evalue	No_ID	No_Description	No_KEGG	No_GO	No_GOCC	No_GOBP	No_GOMF	No_keywords		-0.537079	1.55479	0.545912	1	59	92	75.5	No
Locus_10022_Transcript_1/2_Confidence_0.750_Length_3596	3596	Locus_10022_Transcript_1/2_Confidence_0.750_Length_3596	3596	Locus_10022_Transcript_1/2_Confidence_0.750_Length_3596	3596	P21556	62.275	2.05e-136	PTAFR_CAVPO	Platelet-activating factor receptor	No_KEGG	GO:0016021 \\ GO:0005654 \\ GO:0005886 \\ GO:0001530 \\ GO:0001875 \\ GO:0005543 \\ GO:0004992 \\ GO:0006935 \\ GO:0001816 \\ GO:0006954 \\ GO:0032959 \\ GO:0048015 \\	chemotaxis (GO:0006935);cytokine production (GO:0001816);inflammatory response (GO:0006954);inositol trisphosphate biosynthetic process (GO:0032959);phosphatidylinositol-mediated signaling (GO:0048015);	lipopolysaccharide binding (GO:0001530);lipopolysaccharide receptor activity (GO:0001875);phospholipid binding (GO:0005543);platelet activating factor receptor activity (GO:0004992);	integral component of membrane (GO:0016021);nucleoplasm (GO:0005654);plasma membrane (GO:0005886);	Cell membrane;Chemotaxis;Complete proteome;Disulfide bond;G-protein coupled receptor;Glycoprotein;Membrane;Receptor;Reference proteome;Transducer;Transmembrane;Transmembrane helix.;		0.488915	1.24653	0.599457	1	68	52	60	PTAFR
Locus_10024_Transcript_1/2_Confidence_0.750_Length_1600	1600	Locus_10024_Transcript_1/2_Confidence_0.750_Length_1600	1600	Locus_10024_Transcript_1/2_Confidence_0.750_Length_1600	1600	Q9Y225	91.892	3.78e-81	RNF24_HUMAN	RING finger protein 24	hsa:11237	GO:0000139 \\ GO:0016021 \\ GO:0061630 \\ GO:0008270 \\ GO:0043161 \\ GO:0000209 \\ GO:0042787 \\	proteasome-mediated ubiquitin-dependent protein catabolic process (GO:0043161);protein polyubiquitination (GO:0000209);protein ubiquitination involved in ubiquitin-dependent protein catabolic process (GO:0042787);	ubiquitin protein ligase activity (GO:0061630);zinc ion binding (GO:0008270);	Golgi membrane (GO:0000139);integral component of membrane (GO:0016021);	3D-structure;Alternative splicing;Complete proteome;Golgi apparatus;Membrane;Metal-binding;Reference proteome;Transmembrane;Transmembrane helix;Zinc;Zinc-finger.;		0.0382793	2.37402	0.969751	1	131	137	134	RNF24
Locus_10025_Transcript_1/1_Confidence_1.000_Length_2531	2531	Locus_10025_Transcript_1/1_Confidence_1.000_Length_2531	2531	Locus_10025_Transcript_1/1_Confidence_1.000_Length_2531	2531	Q921Y2	64.324	3.77e-54	IMP3_MOUSE	U3 small nucleolar ribonucleoprotein protein IMP3	mmu:102462	GO:0034457 \\ GO:0005730 \\ GO:0005634 \\ GO:0032040 \\ GO:0044822 \\ GO:0030515 \\ GO:0030519 \\ GO:0006364 \\	rRNA processing (GO:0006364);	poly(A) RNA binding (GO:0044822);snoRNA binding (GO:0030515);snoRNP binding (GO:0030519);	Mpp10 complex (GO:0034457);nucleolus (GO:0005730);nucleus (GO:0005634);small-subunit processome (GO:0032040);	Complete proteome;Nucleus;Reference proteome;Ribonucleoprotein;Ribosome biogenesis;RNA-binding;rRNA processing;rRNA-binding.;		-0.00695158	4.05238	0.99683	1	417	450	433.5	IMP3
Locus_10026_Transcript_1/5_Confidence_0.583_Length_1536	1536	Locus_10026_Transcript_1/5_Confidence_0.583_Length_1536	1536	Locus_10026_Transcript_1/5_Confidence_0.583_Length_1536	1536	P82919	58.182	9.46e-10	RT18A_BOVIN	28S ribosomal protein S18a, mitochondrial	bta:614102	GO:0005743 \\ GO:0005763 \\ GO:0003735 \\ GO:0032543 \\	mitochondrial translation (GO:0032543);	structural constituent of ribosome (GO:0003735);	mitochondrial inner membrane (GO:0005743);mitochondrial small ribosomal subunit (GO:0005763);	3D-structure;Complete proteome;Direct protein sequencing;Mitochondrion;Reference proteome;Ribonucleoprotein;Ribosomal protein;Transit peptide.;		0.225424	4.0245	0.792187	1	442	406	424	RT18A
Locus_10026_Transcript_2/5_Confidence_0.583_Length_1712	1712	Locus_10026_Transcript_2/5_Confidence_0.583_Length_1712	1712	Locus_10026_Transcript_2/5_Confidence_0.583_Length_1712	1712	P82919	66.327	4.17e-78	RT18A_BOVIN	28S ribosomal protein S18a, mitochondrial	bta:614102	GO:0005743 \\ GO:0005763 \\ GO:0003735 \\ GO:0032543 \\	mitochondrial translation (GO:0032543);	structural constituent of ribosome (GO:0003735);	mitochondrial inner membrane (GO:0005743);mitochondrial small ribosomal subunit (GO:0005763);	3D-structure;Complete proteome;Direct protein sequencing;Mitochondrion;Reference proteome;Ribonucleoprotein;Ribosomal protein;Transit peptide.;		-0.0540765	4.91621	0.949476	1	748	834	791	RT18A
Locus_10026_Transcript_3/5_Confidence_0.667_Length_1412	1412	Locus_10026_Transcript_3/5_Confidence_0.667_Length_1412	1412	Locus_10026_Transcript_3/5_Confidence_0.667_Length_1412	1412	P82919	62	4.37e-10	RT18A_BOVIN	28S ribosomal protein S18a, mitochondrial	bta:614102	GO:0005743 \\ GO:0005763 \\ GO:0003735 \\ GO:0032543 \\	mitochondrial translation (GO:0032543);	structural constituent of ribosome (GO:0003735);	mitochondrial inner membrane (GO:0005743);mitochondrial small ribosomal subunit (GO:0005763);	3D-structure;Complete proteome;Direct protein sequencing;Mitochondrion;Reference proteome;Ribonucleoprotein;Ribosomal protein;Transit peptide.;		0.0784176	3.98253	0.926905	1	409	416	412.5	RT18A
Locus_10028_Transcript_1/1_Confidence_1.000_Length_676	676	Locus_10028_Transcript_1/1_Confidence_1.000_Length_676	676	Locus_10028_Transcript_1/1_Confidence_1.000_Length_676	676	Q9UBY9	46.392	7.39e-22	HSPB7_HUMAN	Heat shock protein beta-7	hsa:27129	GO:0015629 \\ GO:0016235 \\ GO:0015030 \\ GO:0005737 \\ GO:0005739 \\ GO:0005654 \\ GO:0005634 \\ GO:0008022 \\ GO:0008016 \\ GO:0009408 \\ GO:0006986 \\	regulation of heart contraction (GO:0008016);response to heat (GO:0009408);response to unfolded protein (GO:0006986);	protein C-terminus binding (GO:0008022);	actin cytoskeleton (GO:0015629);aggresome (GO:0016235);Cajal body (GO:0015030);cytoplasm (GO:0005737);mitochondrion (GO:0005739);nucleoplasm (GO:0005654);nucleus (GO:0005634);	Alternative splicing;Chaperone;Complete proteome;Cytoplasm;Nucleus;Reference proteome;Stress response.;		-0.0572888	8.00253	0.945375	1	6360	7107	6733.5	HSPB7
Locus_10029_Transcript_1/1_Confidence_1.000_Length_2252	2252	No_sig_nr_hit	No_sig_nr_hit	No_sig_nr_hit	No_sig_nr_hit	No_Uniprotmatch	No_%_identity	No_evalue	No_ID	No_Description	No_KEGG	No_GO	No_GOCC	No_GOBP	No_GOMF	No_keywords		-0.079038	5.55196	0.92569	1	1153	1308	1230.5	No
Locus_1003_Transcript_3/8_Confidence_0.250_Length_2523	2523	Locus_1003_Transcript_3/8_Confidence_0.250_Length_2523	2523	Locus_1003_Transcript_3/8_Confidence_0.250_Length_2523	2523	P51003	96.721	0	PAPOA_HUMAN	Poly(A) polymerase alpha	hsa:10914	GO:0005737 \\ GO:0005654 \\ GO:0005634 \\ GO:0005524 \\ GO:0000287 \\ GO:0030145 \\ GO:0004652 \\ GO:0003723 \\ GO:0010467 \\ GO:0031124 \\ GO:0006378 \\ GO:0000398 \\ GO:0031440 \\ GO:0043631 \\ GO:0008380 \\ GO:0006369 \\ GO:0006366 \\	gene expression (GO:0010467);mRNA 3'-end processing (GO:0031124);mRNA polyadenylation (GO:0006378);mRNA splicing, via spliceosome (GO:0000398);regulation of mRNA 3'-end processing (GO:0031440);RNA polyadenylation (GO:0043631);RNA splicing (GO:0008380);termination of RNA polymerase II transcription (GO:0006369);transcription from RNA polymerase II promoter (GO:0006366);	ATP binding (GO:0005524);magnesium ion binding (GO:0000287);manganese ion binding (GO:0030145);polynucleotide adenylyltransferase activity (GO:0004652);RNA binding (GO:0003723);	cytoplasm (GO:0005737);nucleoplasm (GO:0005654);nucleus (GO:0005634);	Acetylation;Alternative splicing;ATP-binding;Complete proteome;Cytoplasm;Isopeptide bond;Magnesium;Manganese;Metal-binding;mRNA processing;Nucleotide-binding;Nucleus;Phosphoprotein;Reference proteome;RNA-binding;Transferase;Ubl conjugation.;		-0.458936	1.10039	0.628271	1	44	65	54.5	PAPOA
Locus_1003_Transcript_4/8_Confidence_0.500_Length_5243	5243	Locus_1003_Transcript_4/8_Confidence_0.500_Length_5243	5243	Locus_1003_Transcript_4/8_Confidence_0.500_Length_5243	5243	P51003	96.048	0	PAPOA_HUMAN	Poly(A) polymerase alpha	hsa:10914	GO:0005737 \\ GO:0005654 \\ GO:0005634 \\ GO:0005524 \\ GO:0000287 \\ GO:0030145 \\ GO:0004652 \\ GO:0003723 \\ GO:0010467 \\ GO:0031124 \\ GO:0006378 \\ GO:0000398 \\ GO:0031440 \\ GO:0043631 \\ GO:0008380 \\ GO:0006369 \\ GO:0006366 \\	gene expression (GO:0010467);mRNA 3'-end processing (GO:0031124);mRNA polyadenylation (GO:0006378);mRNA splicing, via spliceosome (GO:0000398);regulation of mRNA 3'-end processing (GO:0031440);RNA polyadenylation (GO:0043631);RNA splicing (GO:0008380);termination of RNA polymerase II transcription (GO:0006369);transcription from RNA polymerase II promoter (GO:0006366);	ATP binding (GO:0005524);magnesium ion binding (GO:0000287);manganese ion binding (GO:0030145);polynucleotide adenylyltransferase activity (GO:0004652);RNA binding (GO:0003723);	cytoplasm (GO:0005737);nucleoplasm (GO:0005654);nucleus (GO:0005634);	Acetylation;Alternative splicing;ATP-binding;Complete proteome;Cytoplasm;Isopeptide bond;Magnesium;Manganese;Metal-binding;mRNA processing;Nucleotide-binding;Nucleus;Phosphoprotein;Reference proteome;RNA-binding;Transferase;Ubl conjugation.;		0.0676012	3.64905	0.937234	1	323	331	327	PAPOA
Locus_1003_Transcript_5/8_Confidence_0.375_Length_2620	2620	Locus_1003_Transcript_5/8_Confidence_0.375_Length_2620	2620	Locus_1003_Transcript_5/8_Confidence_0.375_Length_2620	2620	P51003	96.048	0	PAPOA_HUMAN	Poly(A) polymerase alpha	hsa:10914	GO:0005737 \\ GO:0005654 \\ GO:0005634 \\ GO:0005524 \\ GO:0000287 \\ GO:0030145 \\ GO:0004652 \\ GO:0003723 \\ GO:0010467 \\ GO:0031124 \\ GO:0006378 \\ GO:0000398 \\ GO:0031440 \\ GO:0043631 \\ GO:0008380 \\ GO:0006369 \\ GO:0006366 \\	gene expression (GO:0010467);mRNA 3'-end processing (GO:0031124);mRNA polyadenylation (GO:0006378);mRNA splicing, via spliceosome (GO:0000398);regulation of mRNA 3'-end processing (GO:0031440);RNA polyadenylation (GO:0043631);RNA splicing (GO:0008380);termination of RNA polymerase II transcription (GO:0006369);transcription from RNA polymerase II promoter (GO:0006366);	ATP binding (GO:0005524);magnesium ion binding (GO:0000287);manganese ion binding (GO:0030145);polynucleotide adenylyltransferase activity (GO:0004652);RNA binding (GO:0003723);	cytoplasm (GO:0005737);nucleoplasm (GO:0005654);nucleus (GO:0005634);	Acetylation;Alternative splicing;ATP-binding;Complete proteome;Cytoplasm;Isopeptide bond;Magnesium;Manganese;Metal-binding;mRNA processing;Nucleotide-binding;Nucleus;Phosphoprotein;Reference proteome;RNA-binding;Transferase;Ubl conjugation.;		-0.172367	1.30607	0.854205	1	57	69	63	PAPOA
Locus_1003_Transcript_6/8_Confidence_0.500_Length_5795	5795	Locus_1003_Transcript_6/8_Confidence_0.500_Length_5795	5795	Locus_1003_Transcript_6/8_Confidence_0.500_Length_5795	5795	Q61183	83.066	0	PAPOA_MOUSE	Poly(A) polymerase alpha	mmu:18789	GO:0005737 \\ GO:0005654 \\ GO:0005634 \\ GO:0005524 \\ GO:0000287 \\ GO:0030145 \\ GO:0004652 \\ GO:0003723 \\ GO:0006378 \\ GO:0031440 \\ GO:0043631 \\	mRNA polyadenylation (GO:0006378);regulation of mRNA 3'-end processing (GO:0031440);RNA polyadenylation (GO:0043631);	ATP binding (GO:0005524);magnesium ion binding (GO:0000287);manganese ion binding (GO:0030145);polynucleotide adenylyltransferase activity (GO:0004652);RNA binding (GO:0003723);	cytoplasm (GO:0005737);nucleoplasm (GO:0005654);nucleus (GO:0005634);	Acetylation;Alternative splicing;ATP-binding;Complete proteome;Isopeptide bond;Magnesium;Manganese;Metal-binding;mRNA processing;Nucleotide-binding;Nucleus;Phosphoprotein;Reference proteome;RNA-binding;Transferase;Ubl conjugation.;		0.0165572	3.60592	0.991376	1	308	327	317.5	PAPOA
Locus_1003_Transcript_7/8_Confidence_0.312_Length_2509	2509	Locus_1003_Transcript_7/8_Confidence_0.312_Length_2509	2509	Locus_1003_Transcript_7/8_Confidence_0.312_Length_2509	2509	P51003	96.042	0	PAPOA_HUMAN	Poly(A) polymerase alpha	hsa:10914	GO:0005737 \\ GO:0005654 \\ GO:0005634 \\ GO:0005524 \\ GO:0000287 \\ GO:0030145 \\ GO:0004652 \\ GO:0003723 \\ GO:0010467 \\ GO:0031124 \\ GO:0006378 \\ GO:0000398 \\ GO:0031440 \\ GO:0043631 \\ GO:0008380 \\ GO:0006369 \\ GO:0006366 \\	gene expression (GO:0010467);mRNA 3'-end processing (GO:0031124);mRNA polyadenylation (GO:0006378);mRNA splicing, via spliceosome (GO:0000398);regulation of mRNA 3'-end processing (GO:0031440);RNA polyadenylation (GO:0043631);RNA splicing (GO:0008380);termination of RNA polymerase II transcription (GO:0006369);transcription from RNA polymerase II promoter (GO:0006366);	ATP binding (GO:0005524);magnesium ion binding (GO:0000287);manganese ion binding (GO:0030145);polynucleotide adenylyltransferase activity (GO:0004652);RNA binding (GO:0003723);	cytoplasm (GO:0005737);nucleoplasm (GO:0005654);nucleus (GO:0005634);	Acetylation;Alternative splicing;ATP-binding;Complete proteome;Cytoplasm;Isopeptide bond;Magnesium;Manganese;Metal-binding;mRNA processing;Nucleotide-binding;Nucleus;Phosphoprotein;Reference proteome;RNA-binding;Transferase;Ubl conjugation.;		0.346325	1.70024	0.701209	1	90	76	83	PAPOA
Locus_1003_Transcript_8/8_Confidence_0.500_Length_5032	5032	Locus_1003_Transcript_8/8_Confidence_0.500_Length_5032	5032	Locus_1003_Transcript_8/8_Confidence_0.500_Length_5032	5032	Q61183	88.649	0	PAPOA_MOUSE	Poly(A) polymerase alpha	mmu:18789	GO:0005737 \\ GO:0005654 \\ GO:0005634 \\ GO:0005524 \\ GO:0000287 \\ GO:0030145 \\ GO:0004652 \\ GO:0003723 \\ GO:0006378 \\ GO:0031440 \\ GO:0043631 \\	mRNA polyadenylation (GO:0006378);regulation of mRNA 3'-end processing (GO:0031440);RNA polyadenylation (GO:0043631);	ATP binding (GO:0005524);magnesium ion binding (GO:0000287);manganese ion binding (GO:0030145);polynucleotide adenylyltransferase activity (GO:0004652);RNA binding (GO:0003723);	cytoplasm (GO:0005737);nucleoplasm (GO:0005654);nucleus (GO:0005634);	Acetylation;Alternative splicing;ATP-binding;Complete proteome;Isopeptide bond;Magnesium;Manganese;Metal-binding;mRNA processing;Nucleotide-binding;Nucleus;Phosphoprotein;Reference proteome;RNA-binding;Transferase;Ubl conjugation.;		0.0662718	3.76484	0.938196	1	350	359	354.5	PAPOA
Locus_10030_Transcript_1/3_Confidence_0.600_Length_1580	1580	Locus_10030_Transcript_1/3_Confidence_0.600_Length_1580	1580	Locus_10030_Transcript_1/3_Confidence_0.600_Length_1580	1580	Q15006	96.831	0	EMC2_HUMAN	ER membrane protein complex subunit 2	hsa:9694	GO:0005737 \\ GO:0005783 \\ GO:0072546 \\ GO:0005739 \\ GO:0005634 \\	No_GOBP	No_GOMF	cytoplasm (GO:0005737);endoplasmic reticulum (GO:0005783);ER membrane protein complex (GO:0072546);mitochondrion (GO:0005739);nucleus (GO:0005634);	Acetylation;Complete proteome;Cytoplasm;Nucleus;Reference proteome;Repeat;TPR repeat.;		-0.0336395	4.0863	0.96905	1	423	465	444	EMC2
Locus_10030_Transcript_2/3_Confidence_0.400_Length_1124	1124	Locus_10030_Transcript_2/3_Confidence_0.400_Length_1124	1124	Locus_10030_Transcript_2/3_Confidence_0.400_Length_1124	1124	Q15006	100	3.5e-08	EMC2_HUMAN	ER membrane protein complex subunit 2	hsa:9694	GO:0005737 \\ GO:0005783 \\ GO:0072546 \\ GO:0005739 \\ GO:0005634 \\	No_GOBP	No_GOMF	cytoplasm (GO:0005737);endoplasmic reticulum (GO:0005783);ER membrane protein complex (GO:0072546);mitochondrion (GO:0005739);nucleus (GO:0005634);	Acetylation;Complete proteome;Cytoplasm;Nucleus;Reference proteome;Repeat;TPR repeat.;		-0.0643086	2.32391	0.947698	1	122	137	129.5	EMC2
Locus_10030_Transcript_3/3_Confidence_0.600_Length_1551	1551	Locus_10030_Transcript_3/3_Confidence_0.600_Length_1551	1551	Locus_10030_Transcript_3/3_Confidence_0.600_Length_1551	1551	Q15006	96.633	0	EMC2_HUMAN	ER membrane protein complex subunit 2	hsa:9694	GO:0005737 \\ GO:0005783 \\ GO:0072546 \\ GO:0005739 \\ GO:0005634 \\	No_GOBP	No_GOMF	cytoplasm (GO:0005737);endoplasmic reticulum (GO:0005783);ER membrane protein complex (GO:0072546);mitochondrion (GO:0005739);nucleus (GO:0005634);	Acetylation;Complete proteome;Cytoplasm;Nucleus;Reference proteome;Repeat;TPR repeat.;		0.0160023	4.20362	0.988589	1	467	496	481.5	EMC2
Locus_10032_Transcript_1/2_Confidence_0.750_Length_1211	1211	Locus_10032_Transcript_1/2_Confidence_0.750_Length_1211	1211	Locus_10032_Transcript_1/2_Confidence_0.750_Length_1211	1211	Q2TBA3	59.216	2.49e-95	MALT1_MOUSE	Mucosa-associated lymphoid tissue lymphoma translocation protein 1 homolog	mmu:240354	GO:0005737 \\ GO:0005829 \\ GO:0005730 \\ GO:0005634 \\ GO:0048471 \\ GO:0043234 \\ GO:0004197 \\ GO:0019209 \\ GO:0008233 \\ GO:0002020 \\ GO:0043621 \\ GO:0004871 \\ GO:0004842 \\ GO:0007250 \\ GO:0042113 \\ GO:0001923 \\ GO:0045087 \\ GO:0051168 \\ GO:0043123 \\ GO:0032743 \\ GO:0051092 \\ GO:0050870 \\ GO:0002726 \\ GO:0051259 \\ GO:0016567 \\ GO:0006508 \\ GO:0042981 \\ GO:0050856 \\ GO:0009…	activation of NF-kappaB-inducing kinase activity (GO:0007250);B cell activation (GO:0042113);B-1 B cell differentiation (GO:0001923);innate immune response (GO:0045087);nuclear export (GO:0051168);positive regulation of I-kappaB kinase/NF-kappaB signaling (GO:0043123);positive regulation of interleukin-2 production (GO:0032743);positive regulation of NF-kappaB transcription factor activity (GO:00…	cysteine-type endopeptidase activity (GO:0004197);kinase activator activity (GO:0019209);peptidase activity (GO:0008233);protease binding (GO:0002020);protein self-association (GO:0043621);signal transducer activity (GO:0004871);ubiquitin-protein transferase activity (GO:0004842);	cytoplasm (GO:0005737);cytosol (GO:0005829);nucleolus (GO:0005730);nucleus (GO:0005634);perinuclear region of cytoplasm (GO:0048471);protein complex (GO:0043234);	3D-structure;Acetylation;Alternative splicing;Complete proteome;Cytoplasm;Disulfide bond;Hydrolase;Immunoglobulin domain;Nucleus;Phosphoprotein;Protease;Reference proteome;Repeat;Ubl conjugation pathway.;		0.399017	-0.666788	0.770753	1	16	13	14.5	MALT1
Locus_10033_Transcript_1/1_Confidence_1.000_Length_3529	3529	Locus_10033_Transcript_1/1_Confidence_1.000_Length_3529	3529	Locus_10033_Transcript_1/1_Confidence_1.000_Length_3529	3529	Q8NI36	71.413	0	WDR36_HUMAN	WD repeat-containing protein 36	hsa:134430	GO:0005730 \\ GO:0032040 \\ GO:0044822 \\ GO:0030516 \\ GO:0050896 \\ GO:0001895 \\ GO:0006364 \\ GO:0007601 \\	regulation of axon extension (GO:0030516);response to stimulus (GO:0050896);retina homeostasis (GO:0001895);rRNA processing (GO:0006364);visual perception (GO:0007601);	poly(A) RNA binding (GO:0044822);	nucleolus (GO:0005730);small-subunit processome (GO:0032040);	Complete proteome;Disease mutation;Glaucoma;Nucleus;Polymorphism;Reference proteome;Repeat;Ribosome biogenesis;rRNA processing;Sensory transduction;Vision;WD repeat.;		-0.011522	2.13755	1	1	109	118	113.5	WDR36
Locus_10034_Transcript_1/1_Confidence_1.000_Length_1590	1590	Locus_10034_Transcript_1/1_Confidence_1.000_Length_1590	1590	Locus_10034_Transcript_1/1_Confidence_1.000_Length_1590	1590	Q3SZ10	85.012	0	RL3L_BOVIN	60S ribosomal protein L3-like	bta:618440	GO:0022625 \\ GO:0016020 \\ GO:0003735 \\ GO:0000027 \\ GO:0006412 \\	ribosomal large subunit assembly (GO:0000027);translation (GO:0006412);	structural constituent of ribosome (GO:0003735);	cytosolic large ribosomal subunit (GO:0022625);membrane (GO:0016020);	Complete proteome;Reference proteome;Ribonucleoprotein;Ribosomal protein.;		0.09115	2.2589	0.934534	1	123	124	123.5	RL3L
Locus_10036_Transcript_1/3_Confidence_0.714_Length_6232	6232	Locus_10036_Transcript_1/3_Confidence_0.714_Length_6232	6232	Locus_10036_Transcript_1/3_Confidence_0.714_Length_6232	6232	Q02440	98.493	0	MYO5A_CHICK	Unconventional myosin-Va	gga:396237	GO:0031941 \\ GO:0000139 \\ GO:0032593 \\ GO:0016459 \\ GO:0005524 \\ GO:0005516 \\ GO:0000146 \\ GO:0060001 \\ GO:0032869 \\ GO:0072659 \\ GO:0016192 \\	cellular response to insulin stimulus (GO:0032869);protein localization to plasma membrane (GO:0072659);vesicle-mediated transport (GO:0016192);	ATP binding (GO:0005524);calmodulin binding (GO:0005516);microfilament motor activity (GO:0000146);minus-end directed microfilament motor activity (GO:0060001);	filamentous actin (GO:0031941);Golgi membrane (GO:0000139);insulin-responsive compartment (GO:0032593);myosin complex (GO:0016459);	3D-structure;Actin-binding;ATP-binding;Calmodulin-binding;Coiled coil;Complete proteome;Direct protein sequencing;Golgi apparatus;Membrane;Motor protein;Myosin;Nucleotide-binding;Phosphoprotein;Reference proteome;Repeat.;		0.0203891	0.495651	1	1	34	36	35	MYO5A
Locus_10038_Transcript_1/5_Confidence_0.636_Length_1751	1751	Locus_10038_Transcript_1/5_Confidence_0.636_Length_1751	1751	Locus_10038_Transcript_1/5_Confidence_0.636_Length_1751	1751	Q8VBV3	86.127	3.42e-139	EXOS2_MOUSE	Exosome complex component RRP4	mmu:227715	GO:0005737 \\ GO:0000177 \\ GO:0000178 \\ GO:0000176 \\ GO:0005730 \\ GO:0005634 \\ GO:0003723 \\ GO:0071034 \\ GO:0043928 \\ GO:0000467 \\ GO:0071035 \\ GO:0071038 \\ GO:0071049 \\ GO:0034427 \\ GO:0071051 \\ GO:0030307 \\ GO:0034475 \\	CUT catabolic process (GO:0071034);exonucleolytic nuclear-transcribed mRNA catabolic process involved in deadenylation-dependent decay (GO:0043928);exonucleolytic trimming to generate mature 3'-end of 5.8S rRNA from tricistronic rRNA transcript (SSU-rRNA, 5.8S rRNA, LSU-rRNA) (GO:0000467);nuclear polyadenylation-dependent rRNA catabolic process (GO:0071035);nuclear polyadenylation-dependent tRNA …	RNA binding (GO:0003723);	cytoplasm (GO:0005737);cytoplasmic exosome (RNase complex) (GO:0000177);exosome (RNase complex) (GO:0000178);nuclear exosome (RNase complex) (GO:0000176);nucleolus (GO:0005730);nucleus (GO:0005634);	Complete proteome;Cytoplasm;Exosome;Nucleus;Phosphoprotein;Reference proteome;RNA-binding;rRNA processing.;		-0.0253297	0.840258	1	1	43	47	45	EXOS2
Locus_10038_Transcript_3/5_Confidence_0.636_Length_1580	1580	Locus_10038_Transcript_3/5_Confidence_0.636_Length_1580	1580	Locus_10038_Transcript_3/5_Confidence_0.636_Length_1580	1580	Q13868	86.7	9.27e-126	EXOS2_HUMAN	Exosome complex component RRP4	hsa:23404	GO:0005737 \\ GO:0000177 \\ GO:0005829 \\ GO:0000178 \\ GO:0000176 \\ GO:0005730 \\ GO:0005634 \\ GO:0000175 \\ GO:0008312 \\ GO:0071034 \\ GO:0043928 \\ GO:0000467 \\ GO:0010467 \\ GO:0071035 \\ GO:0071038 \\ GO:0071049 \\ GO:0000288 \\ GO:0034427 \\ GO:0071051 \\ GO:0030307 \\ GO:0043488 \\ GO:0006364 \\ GO:0034475 \\	CUT catabolic process (GO:0071034);exonucleolytic nuclear-transcribed mRNA catabolic process involved in deadenylation-dependent decay (GO:0043928);exonucleolytic trimming to generate mature 3'-end of 5.8S rRNA from tricistronic rRNA transcript (SSU-rRNA, 5.8S rRNA, LSU-rRNA) (GO:0000467);gene expression (GO:0010467);nuclear polyadenylation-dependent rRNA catabolic process (GO:0071035);nuclear po…	3'-5'-exoribonuclease activity (GO:0000175);7S RNA binding (GO:0008312);	cytoplasm (GO:0005737);cytoplasmic exosome (RNase complex) (GO:0000177);cytosol (GO:0005829);exosome (RNase complex) (GO:0000178);nuclear exosome (RNase complex) (GO:0000176);nucleolus (GO:0005730);nucleus (GO:0005634);	3D-structure;Alternative splicing;Complete proteome;Cytoplasm;Exosome;Nucleus;Phosphoprotein;Reference proteome;RNA-binding;rRNA processing.;		-0.242291	1.10308	0.809411	1	48	61	54.5	EXOS2
Locus_10038_Transcript_4/5_Confidence_0.636_Length_1787	1787	Locus_10038_Transcript_4/5_Confidence_0.636_Length_1787	1787	Locus_10038_Transcript_4/5_Confidence_0.636_Length_1787	1787	Q8VBV3	86.093	2.35e-87	EXOS2_MOUSE	Exosome complex component RRP4	mmu:227715	GO:0005737 \\ GO:0000177 \\ GO:0000178 \\ GO:0000176 \\ GO:0005730 \\ GO:0005634 \\ GO:0003723 \\ GO:0071034 \\ GO:0043928 \\ GO:0000467 \\ GO:0071035 \\ GO:0071038 \\ GO:0071049 \\ GO:0034427 \\ GO:0071051 \\ GO:0030307 \\ GO:0034475 \\	CUT catabolic process (GO:0071034);exonucleolytic nuclear-transcribed mRNA catabolic process involved in deadenylation-dependent decay (GO:0043928);exonucleolytic trimming to generate mature 3'-end of 5.8S rRNA from tricistronic rRNA transcript (SSU-rRNA, 5.8S rRNA, LSU-rRNA) (GO:0000467);nuclear polyadenylation-dependent rRNA catabolic process (GO:0071035);nuclear polyadenylation-dependent tRNA …	RNA binding (GO:0003723);	cytoplasm (GO:0005737);cytoplasmic exosome (RNase complex) (GO:0000177);exosome (RNase complex) (GO:0000178);nuclear exosome (RNase complex) (GO:0000176);nucleolus (GO:0005730);nucleus (GO:0005634);	Complete proteome;Cytoplasm;Exosome;Nucleus;Phosphoprotein;Reference proteome;RNA-binding;rRNA processing.;		-0.32797	0.996169	0.745665	1	43	58	50.5	EXOS2
Locus_10038_Transcript_5/5_Confidence_0.636_Length_1641	1641	Locus_10038_Transcript_5/5_Confidence_0.636_Length_1641	1641	Locus_10038_Transcript_5/5_Confidence_0.636_Length_1641	1641	Q8VBV3	83.904	1.41e-179	EXOS2_MOUSE	Exosome complex component RRP4	mmu:227715	GO:0005737 \\ GO:0000177 \\ GO:0000178 \\ GO:0000176 \\ GO:0005730 \\ GO:0005634 \\ GO:0003723 \\ GO:0071034 \\ GO:0043928 \\ GO:0000467 \\ GO:0071035 \\ GO:0071038 \\ GO:0071049 \\ GO:0034427 \\ GO:0071051 \\ GO:0030307 \\ GO:0034475 \\	CUT catabolic process (GO:0071034);exonucleolytic nuclear-transcribed mRNA catabolic process involved in deadenylation-dependent decay (GO:0043928);exonucleolytic trimming to generate mature 3'-end of 5.8S rRNA from tricistronic rRNA transcript (SSU-rRNA, 5.8S rRNA, LSU-rRNA) (GO:0000467);nuclear polyadenylation-dependent rRNA catabolic process (GO:0071035);nuclear polyadenylation-dependent tRNA …	RNA binding (GO:0003723);	cytoplasm (GO:0005737);cytoplasmic exosome (RNase complex) (GO:0000177);exosome (RNase complex) (GO:0000178);nuclear exosome (RNase complex) (GO:0000176);nucleolus (GO:0005730);nucleus (GO:0005634);	Complete proteome;Cytoplasm;Exosome;Nucleus;Phosphoprotein;Reference proteome;RNA-binding;rRNA processing.;		-0.311248	0.852107	0.744865	1	39	52	45.5	EXOS2
Locus_1004_Transcript_7/12_Confidence_0.559_Length_9759	9759	Locus_1004_Transcript_7/12_Confidence_0.559_Length_9759	9759	Locus_1004_Transcript_7/12_Confidence_0.559_Length_9759	9759	Q8BI84	48.953	0	MIA3_MOUSE	Melanoma inhibitory activity protein 3	mmu:338366	GO:0005789 \\ GO:0016021 \\ GO:0043231 \\ GO:0016020 \\ GO:0002063 \\ GO:0030199 \\ GO:0006887 \\ GO:0007162 \\ GO:0030336 \\ GO:0030501 \\ GO:0002687 \\ GO:0015031 \\ GO:0042060 \\	chondrocyte development (GO:0002063);collagen fibril organization (GO:0030199);exocytosis (GO:0006887);negative regulation of cell adhesion (GO:0007162);negative regulation of cell migration (GO:0030336);positive regulation of bone mineralization (GO:0030501);positive regulation of leukocyte migration (GO:0002687);protein transport (GO:0015031);wound healing (GO:0042060);	No_GOMF	endoplasmic reticulum membrane (GO:0005789);integral component of membrane (GO:0016021);intracellular membrane-bounded organelle (GO:0043231);membrane (GO:0016020);	Alternative splicing;Coiled coil;Complete proteome;Endoplasmic reticulum;ER-Golgi transport;Exocytosis;Glycoprotein;Membrane;Phosphoprotein;Protein transport;Reference proteome;SH3 domain;Signal;Transmembrane;Transmembrane helix;Transport.;		0.0410756	4.4211	0.963183	1	548	572	560	MIA3
Locus_1004_Transcript_8/12_Confidence_0.508_Length_11070	11070	Locus_1004_Transcript_8/12_Confidence_0.508_Length_11070	11070	Locus_1004_Transcript_8/12_Confidence_0.508_Length_11070	11070	Q8BI84	48.953	0	MIA3_MOUSE	Melanoma inhibitory activity protein 3	mmu:338366	GO:0005789 \\ GO:0016021 \\ GO:0043231 \\ GO:0016020 \\ GO:0002063 \\ GO:0030199 \\ GO:0006887 \\ GO:0007162 \\ GO:0030336 \\ GO:0030501 \\ GO:0002687 \\ GO:0015031 \\ GO:0042060 \\	chondrocyte development (GO:0002063);collagen fibril organization (GO:0030199);exocytosis (GO:0006887);negative regulation of cell adhesion (GO:0007162);negative regulation of cell migration (GO:0030336);positive regulation of bone mineralization (GO:0030501);positive regulation of leukocyte migration (GO:0002687);protein transport (GO:0015031);wound healing (GO:0042060);	No_GOMF	endoplasmic reticulum membrane (GO:0005789);integral component of membrane (GO:0016021);intracellular membrane-bounded organelle (GO:0043231);membrane (GO:0016020);	Alternative splicing;Coiled coil;Complete proteome;Endoplasmic reticulum;ER-Golgi transport;Exocytosis;Glycoprotein;Membrane;Phosphoprotein;Protein transport;Reference proteome;SH3 domain;Signal;Transmembrane;Transmembrane helix;Transport.;		0.035384	4.61526	0.967811	1	626	656	641	MIA3
Locus_1004_Transcript_9/12_Confidence_0.542_Length_11485	11485	Locus_1004_Transcript_9/12_Confidence_0.542_Length_11485	11485	Locus_1004_Transcript_9/12_Confidence_0.542_Length_11485	11485	Q8BI84	48.444	5.71e-176	MIA3_MOUSE	Melanoma inhibitory activity protein 3	mmu:338366	GO:0005789 \\ GO:0016021 \\ GO:0043231 \\ GO:0016020 \\ GO:0002063 \\ GO:0030199 \\ GO:0006887 \\ GO:0007162 \\ GO:0030336 \\ GO:0030501 \\ GO:0002687 \\ GO:0015031 \\ GO:0042060 \\	chondrocyte development (GO:0002063);collagen fibril organization (GO:0030199);exocytosis (GO:0006887);negative regulation of cell adhesion (GO:0007162);negative regulation of cell migration (GO:0030336);positive regulation of bone mineralization (GO:0030501);positive regulation of leukocyte migration (GO:0002687);protein transport (GO:0015031);wound healing (GO:0042060);	No_GOMF	endoplasmic reticulum membrane (GO:0005789);integral component of membrane (GO:0016021);intracellular membrane-bounded organelle (GO:0043231);membrane (GO:0016020);	Alternative splicing;Coiled coil;Complete proteome;Endoplasmic reticulum;ER-Golgi transport;Exocytosis;Glycoprotein;Membrane;Phosphoprotein;Protein transport;Reference proteome;SH3 domain;Signal;Transmembrane;Transmembrane helix;Transport.;		0.0740771	4.63709	0.932383	1	644	657	650.5	MIA3
Locus_10043_Transcript_1/2_Confidence_0.750_Length_2073	2073	Locus_10043_Transcript_1/2_Confidence_0.750_Length_2073	2073	Locus_10043_Transcript_1/2_Confidence_0.750_Length_2073	2073	Q6V0I7	88.745	0	FAT4_HUMAN	Protocadherin Fat 4	hsa:79633	GO:0045177 \\ GO:0070062 \\ GO:0016021 \\ GO:0005622 \\ GO:0005886 \\ GO:0005509 \\ GO:0001658 \\ GO:0021987 \\ GO:0048565 \\ GO:0003007 \\ GO:0007157 \\ GO:0035329 \\ GO:0007156 \\ GO:0060122 \\ GO:0022008 \\ GO:0043931 \\ GO:0007009 \\ GO:0072307 \\	branching involved in ureteric bud morphogenesis (GO:0001658);cerebral cortex development (GO:0021987);digestive tract development (GO:0048565);heart morphogenesis (GO:0003007);heterophilic cell-cell adhesion via plasma membrane cell adhesion molecules (GO:0007157);hippo signaling (GO:0035329);homophilic cell adhesion via plasma membrane adhesion molecules (GO:0007156);inner ear receptor stereoci…	calcium ion binding (GO:0005509);	apical part of cell (GO:0045177);extracellular exosome (GO:0070062);integral component of membrane (GO:0016021);intracellular (GO:0005622);plasma membrane (GO:0005886);	Alternative splicing;Calcium;Cell adhesion;Complete proteome;Deafness;Disease mutation;Disulfide bond;EGF-like domain;Glycoprotein;Membrane;Mental retardation;Phosphoprotein;Polymorphism;Reference proteome;Repeat;Signal;Transmembrane;Transmembrane helix.;		-0.247603	0.412613	0.80958	1	29	37	33	FAT4
Locus_10045_Transcript_4/9_Confidence_0.625_Length_4100	4100	Locus_10045_Transcript_4/9_Confidence_0.625_Length_4100	4100	Locus_10045_Transcript_4/9_Confidence_0.625_Length_4100	4100	P08575	60.584	0	PTPRC_HUMAN	Receptor-type tyrosine-protein phosphatase C	No_KEGG	GO:0009986 \\ GO:0009897 \\ GO:0070062 \\ GO:0005925 \\ GO:0005887 \\ GO:0005622 \\ GO:0016020 \\ GO:0045121 \\ GO:0005886 \\ GO:0019901 \\ GO:0004725 \\ GO:0005001 \\ GO:0007411 \\ GO:0042100 \\ GO:0050853 \\ GO:0048539 \\ GO:0044770 \\ GO:0007166 \\ GO:0051607 \\ GO:0016311 \\ GO:0002244 \\ GO:0002378 \\ GO:0006933 \\ GO:0001960 \\ GO:0006469 \\ GO:0001915 \\ GO:0035335 \\ GO:0050857 \\ GO:0030…	axon guidance (GO:0007411);B cell proliferation (GO:0042100);B cell receptor signaling pathway (GO:0050853);bone marrow development (GO:0048539);cell cycle phase transition (GO:0044770);cell surface receptor signaling pathway (GO:0007166);defense response to virus (GO:0051607);dephosphorylation (GO:0016311);hematopoietic progenitor cell differentiation (GO:0002244);immunoglobulin biosynthetic pro…	protein kinase binding (GO:0019901);protein tyrosine phosphatase activity (GO:0004725);transmembrane receptor protein tyrosine phosphatase activity (GO:0005001);	cell surface (GO:0009986);external side of plasma membrane (GO:0009897);extracellular exosome (GO:0070062);focal adhesion (GO:0005925);integral component of plasma membrane (GO:0005887);intracellular (GO:0005622);membrane (GO:0016020);membrane raft (GO:0045121);plasma membrane (GO:0005886);	3D-structure;Alternative splicing;Complete proteome;Disease mutation;Glycoprotein;Hydrolase;Membrane;Phosphoprotein;Polymorphism;Protein phosphatase;Reference proteome;Repeat;SCID;Signal;Transmembrane;Transmembrane helix.;		-0.244506	1.29399	0.79123	1	55	70	62.5	PTPRC
Locus_10045_Transcript_5/9_Confidence_0.583_Length_4167	4167	Locus_10045_Transcript_5/9_Confidence_0.583_Length_4167	4167	Locus_10045_Transcript_5/9_Confidence_0.583_Length_4167	4167	P08575	61.105	0	PTPRC_HUMAN	Receptor-type tyrosine-protein phosphatase C	No_KEGG	GO:0009986 \\ GO:0009897 \\ GO:0070062 \\ GO:0005925 \\ GO:0005887 \\ GO:0005622 \\ GO:0016020 \\ GO:0045121 \\ GO:0005886 \\ GO:0019901 \\ GO:0004725 \\ GO:0005001 \\ GO:0007411 \\ GO:0042100 \\ GO:0050853 \\ GO:0048539 \\ GO:0044770 \\ GO:0007166 \\ GO:0051607 \\ GO:0016311 \\ GO:0002244 \\ GO:0002378 \\ GO:0006933 \\ GO:0001960 \\ GO:0006469 \\ GO:0001915 \\ GO:0035335 \\ GO:0050857 \\ GO:0030…	axon guidance (GO:0007411);B cell proliferation (GO:0042100);B cell receptor signaling pathway (GO:0050853);bone marrow development (GO:0048539);cell cycle phase transition (GO:0044770);cell surface receptor signaling pathway (GO:0007166);defense response to virus (GO:0051607);dephosphorylation (GO:0016311);hematopoietic progenitor cell differentiation (GO:0002244);immunoglobulin biosynthetic pro…	protein kinase binding (GO:0019901);protein tyrosine phosphatase activity (GO:0004725);transmembrane receptor protein tyrosine phosphatase activity (GO:0005001);	cell surface (GO:0009986);external side of plasma membrane (GO:0009897);extracellular exosome (GO:0070062);focal adhesion (GO:0005925);integral component of plasma membrane (GO:0005887);intracellular (GO:0005622);membrane (GO:0016020);membrane raft (GO:0045121);plasma membrane (GO:0005886);	3D-structure;Alternative splicing;Complete proteome;Disease mutation;Glycoprotein;Hydrolase;Membrane;Phosphoprotein;Polymorphism;Protein phosphatase;Reference proteome;Repeat;SCID;Signal;Transmembrane;Transmembrane helix.;		0.50306	0.399841	0.623682	1	37	28	32.5	PTPRC
Locus_10045_Transcript_6/9_Confidence_0.500_Length_4045	4045	Locus_10045_Transcript_6/9_Confidence_0.500_Length_4045	4045	Locus_10045_Transcript_6/9_Confidence_0.500_Length_4045	4045	P08575	65.041	0	PTPRC_HUMAN	Receptor-type tyrosine-protein phosphatase C	No_KEGG	GO:0009986 \\ GO:0009897 \\ GO:0070062 \\ GO:0005925 \\ GO:0005887 \\ GO:0005622 \\ GO:0016020 \\ GO:0045121 \\ GO:0005886 \\ GO:0019901 \\ GO:0004725 \\ GO:0005001 \\ GO:0007411 \\ GO:0042100 \\ GO:0050853 \\ GO:0048539 \\ GO:0044770 \\ GO:0007166 \\ GO:0051607 \\ GO:0016311 \\ GO:0002244 \\ GO:0002378 \\ GO:0006933 \\ GO:0001960 \\ GO:0006469 \\ GO:0001915 \\ GO:0035335 \\ GO:0050857 \\ GO:0030…	axon guidance (GO:0007411);B cell proliferation (GO:0042100);B cell receptor signaling pathway (GO:0050853);bone marrow development (GO:0048539);cell cycle phase transition (GO:0044770);cell surface receptor signaling pathway (GO:0007166);defense response to virus (GO:0051607);dephosphorylation (GO:0016311);hematopoietic progenitor cell differentiation (GO:0002244);immunoglobulin biosynthetic pro…	protein kinase binding (GO:0019901);protein tyrosine phosphatase activity (GO:0004725);transmembrane receptor protein tyrosine phosphatase activity (GO:0005001);	cell surface (GO:0009986);external side of plasma membrane (GO:0009897);extracellular exosome (GO:0070062);focal adhesion (GO:0005925);integral component of plasma membrane (GO:0005887);intracellular (GO:0005622);membrane (GO:0016020);membrane raft (GO:0045121);plasma membrane (GO:0005886);	3D-structure;Alternative splicing;Complete proteome;Disease mutation;Glycoprotein;Hydrolase;Membrane;Phosphoprotein;Polymorphism;Protein phosphatase;Reference proteome;Repeat;SCID;Signal;Transmembrane;Transmembrane helix.;		-0.0463536	1.19226	0.977356	1	55	61	58	PTPRC
Locus_100468_Transcript_1/1_Confidence_1.000_Length_290	290	Locus_100468_Transcript_1/1_Confidence_1.000_Length_290	290	Locus_100468_Transcript_1/1_Confidence_1.000_Length_290	290	Q99593	100	6.54e-64	TBX5_HUMAN	T-box transcription factor TBX5	hsa:6910	GO:0005737 \\ GO:0005654 \\ GO:0005634 \\ GO:0003677 \\ GO:0000977 \\ GO:0043565 \\ GO:0003700 \\ GO:0008134 \\ GO:0001228 \\ GO:0060413 \\ GO:0003181 \\ GO:0003166 \\ GO:0003218 \\ GO:0055007 \\ GO:0060980 \\ GO:0007267 \\ GO:0035115 \\ GO:0030326 \\ GO:0003197 \\ GO:0035136 \\ GO:0010467 \\ GO:0007507 \\ GO:0030324 \\ GO:0002009 \\ GO:0060044 \\ GO:0030336 \\ GO:0008285 \\ GO:0010719 \\ GO:0007…	atrial septum morphogenesis (GO:0060413);atrioventricular valve morphogenesis (GO:0003181);bundle of His development (GO:0003166);cardiac left ventricle formation (GO:0003218);cardiac muscle cell differentiation (GO:0055007);cell migration involved in coronary vasculogenesis (GO:0060980);cell-cell signaling (GO:0007267);embryonic forelimb morphogenesis (GO:0035115);embryonic limb morphogenesis (G…	DNA binding (GO:0003677);RNA polymerase II regulatory region sequence-specific DNA binding (GO:0000977);sequence-specific DNA binding (GO:0043565);transcription factor activity, sequence-specific DNA binding (GO:0003700);transcription factor binding (GO:0008134);transcriptional activator activity, RNA polymerase II transcription regulatory region sequence-specific binding (GO:0001228);	cytoplasm (GO:0005737);nucleoplasm (GO:0005654);nucleus (GO:0005634);	3D-structure;Alternative splicing;Cardiomyopathy;Complete proteome;Developmental protein;Disease mutation;DNA-binding;Nucleus;Reference proteome;Transcription;Transcription regulation.;		0.458887	0.557863	0.659671	1	41	32	36.5	TBX5
Locus_10047_Transcript_1/4_Confidence_0.400_Length_1715	1715	Locus_10047_Transcript_1/4_Confidence_0.400_Length_1715	1715	Locus_10047_Transcript_1/4_Confidence_0.400_Length_1715	1715	Q5ZKF6	89.873	1.85e-81	5NT3B_CHICK	7-methylguanosine phosphate-specific 5'-nucleotidase {ECO:0000250|UniProtKB:Q9W197}	gga:420034	GO:0005737 \\ GO:0008253 \\ GO:0000287 \\ GO:0000166 \\ GO:0009117 \\	nucleotide metabolic process (GO:0009117);	5'-nucleotidase activity (GO:0008253);magnesium ion binding (GO:0000287);nucleotide binding (GO:0000166);	cytoplasm (GO:0005737);	Complete proteome;Cytoplasm;Hydrolase;Magnesium;Metal-binding;Nucleotide metabolism;Nucleotide-binding;Reference proteome.;		-0.288682	2.64778	0.737145	1	141	185	163	5NT3B
Locus_10047_Transcript_2/4_Confidence_0.700_Length_1974	1974	Locus_10047_Transcript_2/4_Confidence_0.700_Length_1974	1974	Locus_10047_Transcript_2/4_Confidence_0.700_Length_1974	1974	Q5ZKF6	87.166	5.93e-98	5NT3B_CHICK	7-methylguanosine phosphate-specific 5'-nucleotidase {ECO:0000250|UniProtKB:Q9W197}	gga:420034	GO:0005737 \\ GO:0008253 \\ GO:0000287 \\ GO:0000166 \\ GO:0009117 \\	nucleotide metabolic process (GO:0009117);	5'-nucleotidase activity (GO:0008253);magnesium ion binding (GO:0000287);nucleotide binding (GO:0000166);	cytoplasm (GO:0005737);	Complete proteome;Cytoplasm;Hydrolase;Magnesium;Metal-binding;Nucleotide metabolism;Nucleotide-binding;Reference proteome.;		-0.137988	2.79158	0.87926	1	165	195	180	5NT3B
Locus_10047_Transcript_3/4_Confidence_0.700_Length_1794	1794	Locus_10047_Transcript_3/4_Confidence_0.700_Length_1794	1794	Locus_10047_Transcript_3/4_Confidence_0.700_Length_1794	1794	Q5ZKF6	87.889	7.38e-165	5NT3B_CHICK	7-methylguanosine phosphate-specific 5'-nucleotidase {ECO:0000250|UniProtKB:Q9W197}	gga:420034	GO:0005737 \\ GO:0008253 \\ GO:0000287 \\ GO:0000166 \\ GO:0009117 \\	nucleotide metabolic process (GO:0009117);	5'-nucleotidase activity (GO:0008253);magnesium ion binding (GO:0000287);nucleotide binding (GO:0000166);	cytoplasm (GO:0005737);	Complete proteome;Cytoplasm;Hydrolase;Magnesium;Metal-binding;Nucleotide metabolism;Nucleotide-binding;Reference proteome.;		-0.0558978	2.94329	0.952374	1	189	211	200	5NT3B
Locus_10048_Transcript_1/2_Confidence_0.750_Length_5027	5027	No_sig_nr_hit	No_sig_nr_hit	No_sig_nr_hit	No_sig_nr_hit	No_Uniprotmatch	No_%_identity	No_evalue	No_ID	No_Description	No_KEGG	No_GO	No_GOCC	No_GOBP	No_GOMF	No_keywords		0.172817	2.83948	0.847288	1	190	181	185.5	No
Locus_10048_Transcript_2/2_Confidence_0.750_Length_4723	4723	No_sig_nr_hit	No_sig_nr_hit	No_sig_nr_hit	No_sig_nr_hit	No_Uniprotmatch	No_%_identity	No_evalue	No_ID	No_Description	No_KEGG	No_GO	No_GOCC	No_GOBP	No_GOMF	No_keywords		-0.05947	2.97501	0.953293	1	193	216	204.5	No
Locus_10049_Transcript_2/6_Confidence_0.562_Length_2651	2651	Locus_10049_Transcript_2/6_Confidence_0.562_Length_2651	2651	Locus_10049_Transcript_2/6_Confidence_0.562_Length_2651	2651	P26261	84.536	1.16e-62	SDC3_CHICK	Syndecan-3	gga:396343	GO:0009986 \\ GO:0016021 \\ GO:0019838 \\ GO:0030154 \\ GO:0016477 \\ GO:0035988 \\ GO:0003419 \\ GO:1900026 \\	cell differentiation (GO:0030154);cell migration (GO:0016477);chondrocyte proliferation (GO:0035988);growth plate cartilage chondrocyte proliferation (GO:0003419);positive regulation of substrate adhesion-dependent cell spreading (GO:1900026);	growth factor binding (GO:0019838);	cell surface (GO:0009986);integral component of membrane (GO:0016021);	Complete proteome;Developmental protein;Differentiation;Glycoprotein;Heparan sulfate;Membrane;Proteoglycan;Reference proteome;Signal;Transmembrane;Transmembrane helix.;		-0.175927	3.5982	0.836125	1	286	347	316.5	SDC3
Locus_10049_Transcript_3/6_Confidence_0.688_Length_2693	2693	Locus_10049_Transcript_3/6_Confidence_0.688_Length_2693	2693	Locus_10049_Transcript_3/6_Confidence_0.688_Length_2693	2693	P26261	84.536	1.23e-62	SDC3_CHICK	Syndecan-3	gga:396343	GO:0009986 \\ GO:0016021 \\ GO:0019838 \\ GO:0030154 \\ GO:0016477 \\ GO:0035988 \\ GO:0003419 \\ GO:1900026 \\	cell differentiation (GO:0030154);cell migration (GO:0016477);chondrocyte proliferation (GO:0035988);growth plate cartilage chondrocyte proliferation (GO:0003419);positive regulation of substrate adhesion-dependent cell spreading (GO:1900026);	growth factor binding (GO:0019838);	cell surface (GO:0009986);integral component of membrane (GO:0016021);	Complete proteome;Developmental protein;Differentiation;Glycoprotein;Heparan sulfate;Membrane;Proteoglycan;Reference proteome;Signal;Transmembrane;Transmembrane helix.;		-0.215765	3.56316	0.801838	1	275	343	309	SDC3
Locus_1005_Transcript_5/6_Confidence_0.615_Length_5640	5640	Locus_1005_Transcript_5/6_Confidence_0.615_Length_5640	5640	Locus_1005_Transcript_5/6_Confidence_0.615_Length_5640	5640	Q05B87	78.322	1.62e-68	FRDA_BOVIN	Frataxin, mitochondrial	bta:505694	GO:0005829 \\ GO:0005739 \\ GO:0051537 \\ GO:0008199 \\ GO:0008198 \\ GO:0004322 \\ GO:0034986 \\ GO:0007628 \\ GO:0009060 \\ GO:0006879 \\ GO:0070301 \\ GO:0009792 \\ GO:0006783 \\ GO:0006811 \\ GO:0018283 \\ GO:0007005 \\ GO:0040015 \\ GO:0046621 \\ GO:0090201 \\ GO:0006119 \\ GO:1904234 \\ GO:0030307 \\ GO:0008284 \\ GO:0048554 \\ GO:1904231 \\ GO:0019230 \\ GO:0016540 \\ GO:0010722 \\ GO:0010…	adult walking behavior (GO:0007628);aerobic respiration (GO:0009060);cellular iron ion homeostasis (GO:0006879);cellular response to hydrogen peroxide (GO:0070301);embryo development ending in birth or egg hatching (GO:0009792);heme biosynthetic process (GO:0006783);ion transport (GO:0006811);iron incorporation into metallo-sulfur cluster (GO:0018283);mitochondrion organization (GO:0007005);negat…	2 iron, 2 sulfur cluster binding (GO:0051537);ferric iron binding (GO:0008199);ferrous iron binding (GO:0008198);ferroxidase activity (GO:0004322);iron chaperone activity (GO:0034986);	cytosol (GO:0005829);mitochondrion (GO:0005739);	Complete proteome;Cytoplasm;Heme biosynthesis;Ion transport;Iron;Iron storage;Iron transport;Mitochondrion;Oxidoreductase;Reference proteome;Transit peptide;Transport.;		0.0543673	5.70583	0.949056	1	1344	1390	1367	FRDA
Locus_10051_Transcript_1/2_Confidence_0.667_Length_7389	7389	Locus_10051_Transcript_1/2_Confidence_0.667_Length_7389	7389	Locus_10051_Transcript_1/2_Confidence_0.667_Length_7389	7389	Q8NCL9	67.89	0	APCDL_HUMAN	Protein APCDD1-like	hsa:164284	GO:0016021 \\	No_GOBP	No_GOMF	integral component of membrane (GO:0016021);	Complete proteome;Glycoprotein;Membrane;Polymorphism;Reference proteome;Signal;Transmembrane;Transmembrane helix.;		-0.138019	3.33899	0.875981	1	242	286	264	APCDL
Locus_10052_Transcript_1/3_Confidence_0.600_Length_961	961	Locus_10052_Transcript_1/3_Confidence_0.600_Length_961	961	Locus_10052_Transcript_1/3_Confidence_0.600_Length_961	961	Q63HR2	61.486	5.23e-101	TNS2_HUMAN	Tensin-2	hsa:23371	GO:0005925 \\ GO:0005622 \\ GO:0005886 \\ GO:0019900 \\ GO:0046872 \\ GO:0004721 \\ GO:0019725 \\ GO:0032963 \\ GO:0035556 \\ GO:0001822 \\ GO:0035264 \\ GO:0048871 \\ GO:0008285 \\ GO:0014850 \\	cellular homeostasis (GO:0019725);collagen metabolic process (GO:0032963);intracellular signal transduction (GO:0035556);kidney development (GO:0001822);multicellular organism growth (GO:0035264);multicellular organismal homeostasis (GO:0048871);negative regulation of cell proliferation (GO:0008285);response to muscle activity (GO:0014850);	kinase binding (GO:0019900);metal ion binding (GO:0046872);phosphoprotein phosphatase activity (GO:0004721);	focal adhesion (GO:0005925);intracellular (GO:0005622);plasma membrane (GO:0005886);	3D-structure;Alternative splicing;Cell junction;Cell membrane;Complete proteome;Hydrolase;Membrane;Metal-binding;Phosphoprotein;Polymorphism;Protein phosphatase;Reference proteome;SH2 domain;Zinc;Zinc-finger.;		-0.0322013	2.18636	0.977072	1	112	123	117.5	TNS2
Locus_10052_Transcript_2/3_Confidence_0.600_Length_1056	1056	Locus_10052_Transcript_2/3_Confidence_0.600_Length_1056	1056	Locus_10052_Transcript_2/3_Confidence_0.600_Length_1056	1056	Q63HR2	70.423	5.92e-55	TNS2_HUMAN	Tensin-2	hsa:23371	GO:0005925 \\ GO:0005622 \\ GO:0005886 \\ GO:0019900 \\ GO:0046872 \\ GO:0004721 \\ GO:0019725 \\ GO:0032963 \\ GO:0035556 \\ GO:0001822 \\ GO:0035264 \\ GO:0048871 \\ GO:0008285 \\ GO:0014850 \\	cellular homeostasis (GO:0019725);collagen metabolic process (GO:0032963);intracellular signal transduction (GO:0035556);kidney development (GO:0001822);multicellular organism growth (GO:0035264);multicellular organismal homeostasis (GO:0048871);negative regulation of cell proliferation (GO:0008285);response to muscle activity (GO:0014850);	kinase binding (GO:0019900);metal ion binding (GO:0046872);phosphoprotein phosphatase activity (GO:0004721);	focal adhesion (GO:0005925);intracellular (GO:0005622);plasma membrane (GO:0005886);	3D-structure;Alternative splicing;Cell junction;Cell membrane;Complete proteome;Hydrolase;Membrane;Metal-binding;Phosphoprotein;Polymorphism;Protein phosphatase;Reference proteome;SH2 domain;Zinc;Zinc-finger.;		0.0609441	3.57008	0.946962	1	305	314	309.5	TNS2
Locus_10052_Transcript_3/3_Confidence_0.600_Length_1470	1470	Locus_10052_Transcript_3/3_Confidence_0.600_Length_1470	1470	Locus_10052_Transcript_3/3_Confidence_0.600_Length_1470	1470	Q63HR2	63.343	5.88e-123	TNS2_HUMAN	Tensin-2	hsa:23371	GO:0005925 \\ GO:0005622 \\ GO:0005886 \\ GO:0019900 \\ GO:0046872 \\ GO:0004721 \\ GO:0019725 \\ GO:0032963 \\ GO:0035556 \\ GO:0001822 \\ GO:0035264 \\ GO:0048871 \\ GO:0008285 \\ GO:0014850 \\	cellular homeostasis (GO:0019725);collagen metabolic process (GO:0032963);intracellular signal transduction (GO:0035556);kidney development (GO:0001822);multicellular organism growth (GO:0035264);multicellular organismal homeostasis (GO:0048871);negative regulation of cell proliferation (GO:0008285);response to muscle activity (GO:0014850);	kinase binding (GO:0019900);metal ion binding (GO:0046872);phosphoprotein phosphatase activity (GO:0004721);	focal adhesion (GO:0005925);intracellular (GO:0005622);plasma membrane (GO:0005886);	3D-structure;Alternative splicing;Cell junction;Cell membrane;Complete proteome;Hydrolase;Membrane;Metal-binding;Phosphoprotein;Polymorphism;Protein phosphatase;Reference proteome;SH2 domain;Zinc;Zinc-finger.;		0.0726856	3.87216	0.931862	1	378	386	382	TNS2
Locus_100529_Transcript_1/1_Confidence_1.000_Length_262	262	No_sig_nr_hit	No_sig_nr_hit	No_sig_nr_hit	No_sig_nr_hit	No_Uniprotmatch	No_%_identity	No_evalue	No_ID	No_Description	No_KEGG	No_GO	No_GOCC	No_GOBP	No_GOMF	No_keywords		-0.136656	-0.907538	0.906907	1	11	13	12	No
Locus_10053_Transcript_3/3_Confidence_0.714_Length_3149	3149	Locus_10053_Transcript_3/3_Confidence_0.714_Length_3149	3149	Locus_10053_Transcript_3/3_Confidence_0.714_Length_3149	3149	C6K2K4	89.524	0	NETO2_RAT	Neuropilin and tolloid-like protein 2	rno:307757	GO:0032983 \\ GO:2000312 \\	regulation of kainate selective glutamate receptor activity (GO:2000312);	No_GOMF	kainate selective glutamate receptor complex (GO:0032983);	Complete proteome;Disulfide bond;Glycoprotein;Membrane;Phosphoprotein;Receptor;Reference proteome;Repeat;Signal;Transmembrane;Transmembrane helix.;		-0.156192	1.50301	0.87156	1	66	79	72.5	NETO2
Locus_10054_Transcript_5/6_Confidence_0.667_Length_5869	5869	Locus_10054_Transcript_5/6_Confidence_0.667_Length_5869	5869	Locus_10054_Transcript_5/6_Confidence_0.667_Length_5869	5869	O60861	83.229	0	GAS7_HUMAN	Growth arrest-specific protein 7	hsa:8522	GO:0005884 \\ GO:0005737 \\ GO:0001726 \\ GO:0003700 \\ GO:0051017 \\ GO:0030041 \\ GO:0007050 \\ GO:0048812 \\ GO:0008360 \\ GO:0006355 \\	actin filament bundle assembly (GO:0051017);actin filament polymerization (GO:0030041);cell cycle arrest (GO:0007050);neuron projection morphogenesis (GO:0048812);regulation of cell shape (GO:0008360);regulation of transcription, DNA-templated (GO:0006355);	transcription factor activity, sequence-specific DNA binding (GO:0003700);	actin filament (GO:0005884);cytoplasm (GO:0005737);ruffle (GO:0001726);	3D-structure;Alternative splicing;Chromosomal rearrangement;Coiled coil;Complete proteome;Cytoplasm;Developmental protein;Differentiation;Neurogenesis;Phosphoprotein;Proto-oncogene;Reference proteome;SH3 domain.;		-0.445008	1.68066	0.608635	1	67	98	82.5	GAS7
Locus_10055_Transcript_1/1_Confidence_1.000_Length_3051	3051	Locus_10055_Transcript_1/1_Confidence_1.000_Length_3051	3051	Locus_10055_Transcript_1/1_Confidence_1.000_Length_3051	3051	Q53GL7	52.406	3.12e-50	PAR10_HUMAN	Poly [ADP-ribose] polymerase 10	hsa:84875	GO:0005737 \\ GO:0005794 \\ GO:0005730 \\ GO:0005654 \\ GO:0005634 \\ GO:0070530 \\ GO:0003950 \\ GO:0048147 \\ GO:0010629 \\ GO:0032088 \\ GO:0033159 \\ GO:1900045 \\ GO:0045071 \\ GO:0006471 \\ GO:0070213 \\ GO:0070212 \\ GO:0010847 \\	negative regulation of fibroblast proliferation (GO:0048147);negative regulation of gene expression (GO:0010629);negative regulation of NF-kappaB transcription factor activity (GO:0032088);negative regulation of protein import into nucleus, translocation (GO:0033159);negative regulation of protein K63-linked ubiquitination (GO:1900045);negative regulation of viral genome replication (GO:0045071);…	K63-linked polyubiquitin binding (GO:0070530);NAD+ ADP-ribosyltransferase activity (GO:0003950);	cytoplasm (GO:0005737);Golgi apparatus (GO:0005794);nucleolus (GO:0005730);nucleoplasm (GO:0005654);nucleus (GO:0005634);	3D-structure;Acetylation;Complete proteome;Cytoplasm;Glycosyltransferase;NAD;Nucleus;Phosphoprotein;Polymorphism;Reference proteome;Transferase.;		-0.136736	1.99133	0.881965	1	94	111	102.5	PAR10
Locus_10056_Transcript_1/4_Confidence_0.556_Length_1221	1221	Locus_10056_Transcript_1/4_Confidence_0.556_Length_1221	1221	Locus_10056_Transcript_1/4_Confidence_0.556_Length_1221	1221	O95816	80.488	9.13e-72	BAG2_HUMAN	BAG family molecular chaperone regulator 2	hsa:9532	GO:0005829 \\ GO:0042802 \\ GO:0034605 \\ GO:0006457 \\ GO:0019538 \\ GO:1900034 \\	cellular response to heat (GO:0034605);protein folding (GO:0006457);protein metabolic process (GO:0019538);regulation of cellular response to heat (GO:1900034);	identical protein binding (GO:0042802);	cytosol (GO:0005829);	Acetylation;Alternative splicing;Chaperone;Coiled coil;Complete proteome;Phosphoprotein;Reference proteome.;		0.0112712	1.30849	1	1	61	65	63	BAG2
Locus_10056_Transcript_2/4_Confidence_0.556_Length_1160	1160	Locus_10056_Transcript_2/4_Confidence_0.556_Length_1160	1160	Locus_10056_Transcript_2/4_Confidence_0.556_Length_1160	1160	O95816	80.625	9.72e-77	BAG2_HUMAN	BAG family molecular chaperone regulator 2	hsa:9532	GO:0005829 \\ GO:0042802 \\ GO:0034605 \\ GO:0006457 \\ GO:0019538 \\ GO:1900034 \\	cellular response to heat (GO:0034605);protein folding (GO:0006457);protein metabolic process (GO:0019538);regulation of cellular response to heat (GO:1900034);	identical protein binding (GO:0042802);	cytosol (GO:0005829);	Acetylation;Alternative splicing;Chaperone;Coiled coil;Complete proteome;Phosphoprotein;Reference proteome.;		-0.0247767	1.15602	1	1	54	59	56.5	BAG2
Locus_10056_Transcript_4/4_Confidence_0.556_Length_1174	1174	Locus_10056_Transcript_4/4_Confidence_0.556_Length_1174	1174	Locus_10056_Transcript_4/4_Confidence_0.556_Length_1174	1174	O95816	74.057	1.38e-93	BAG2_HUMAN	BAG family molecular chaperone regulator 2	hsa:9532	GO:0005829 \\ GO:0042802 \\ GO:0034605 \\ GO:0006457 \\ GO:0019538 \\ GO:1900034 \\	cellular response to heat (GO:0034605);protein folding (GO:0006457);protein metabolic process (GO:0019538);regulation of cellular response to heat (GO:1900034);	identical protein binding (GO:0042802);	cytosol (GO:0005829);	Acetylation;Alternative splicing;Chaperone;Coiled coil;Complete proteome;Phosphoprotein;Reference proteome.;		0.0405668	1.4464	1	1	68	71	69.5	BAG2
Locus_10057_Transcript_1/2_Confidence_0.750_Length_2188	2188	Locus_10057_Transcript_1/2_Confidence_0.750_Length_2188	2188	Locus_10057_Transcript_1/2_Confidence_0.750_Length_2188	2188	Q5R7Q3	85.596	4.94e-165	NIPA2_PONAB	Magnesium transporter NIPA2	pon:100173267	GO:0005769 \\ GO:0016021 \\ GO:0005886 \\ GO:0015095 \\ GO:0015693 \\	magnesium ion transport (GO:0015693);	magnesium ion transmembrane transporter activity (GO:0015095);	early endosome (GO:0005769);integral component of membrane (GO:0016021);plasma membrane (GO:0005886);	Cell membrane;Complete proteome;Endosome;Ion transport;Magnesium;Membrane;Reference proteome;Transmembrane;Transmembrane helix;Transport.;		0.0278161	4.36327	0.977007	1	524	552	538	NIPA2
Locus_1006_Transcript_1/4_Confidence_0.600_Length_1117	1117	Locus_1006_Transcript_1/4_Confidence_0.600_Length_1117	1117	Locus_1006_Transcript_1/4_Confidence_0.600_Length_1117	1117	P59999	94.815	1.61e-82	ARPC4_MOUSE	Actin-related protein 2/3 complex subunit 4	mmu:68089	GO:0005885 \\ GO:0042995 \\ GO:0005737 \\ GO:0070062 \\ GO:0019899 \\ GO:0005200 \\ GO:0030041 \\ GO:0034314 \\	actin filament polymerization (GO:0030041);Arp2/3 complex-mediated actin nucleation (GO:0034314);	enzyme binding (GO:0019899);structural constituent of cytoskeleton (GO:0005200);	Arp2/3 protein complex (GO:0005885);cell projection (GO:0042995);cytoplasm (GO:0005737);extracellular exosome (GO:0070062);	Acetylation;Actin-binding;Cell projection;Complete proteome;Cytoplasm;Cytoskeleton;Direct protein sequencing;Reference proteome.;		-0.0401716	2.72413	0.968333	1	163	180	171.5	ARPC4
Locus_1006_Transcript_2/4_Confidence_0.500_Length_897	897	Locus_1006_Transcript_2/4_Confidence_0.500_Length_897	897	Locus_1006_Transcript_2/4_Confidence_0.500_Length_897	897	P59999	100	1.82e-57	ARPC4_MOUSE	Actin-related protein 2/3 complex subunit 4	mmu:68089	GO:0005885 \\ GO:0042995 \\ GO:0005737 \\ GO:0070062 \\ GO:0019899 \\ GO:0005200 \\ GO:0030041 \\ GO:0034314 \\	actin filament polymerization (GO:0030041);Arp2/3 complex-mediated actin nucleation (GO:0034314);	enzyme binding (GO:0019899);structural constituent of cytoskeleton (GO:0005200);	Arp2/3 protein complex (GO:0005885);cell projection (GO:0042995);cytoplasm (GO:0005737);extracellular exosome (GO:0070062);	Acetylation;Actin-binding;Cell projection;Complete proteome;Cytoplasm;Cytoskeleton;Direct protein sequencing;Reference proteome.;		0.117278	2.94607	0.898134	1	201	199	200	ARPC4
Locus_1006_Transcript_3/4_Confidence_0.600_Length_1187	1187	Locus_1006_Transcript_3/4_Confidence_0.600_Length_1187	1187	Locus_1006_Transcript_3/4_Confidence_0.600_Length_1187	1187	P59999	94.815	3.27e-82	ARPC4_MOUSE	Actin-related protein 2/3 complex subunit 4	mmu:68089	GO:0005885 \\ GO:0042995 \\ GO:0005737 \\ GO:0070062 \\ GO:0019899 \\ GO:0005200 \\ GO:0030041 \\ GO:0034314 \\	actin filament polymerization (GO:0030041);Arp2/3 complex-mediated actin nucleation (GO:0034314);	enzyme binding (GO:0019899);structural constituent of cytoskeleton (GO:0005200);	Arp2/3 protein complex (GO:0005885);cell projection (GO:0042995);cytoplasm (GO:0005737);extracellular exosome (GO:0070062);	Acetylation;Actin-binding;Cell projection;Complete proteome;Cytoplasm;Cytoskeleton;Direct protein sequencing;Reference proteome.;		0.125802	2.86163	0.884897	1	190	187	188.5	ARPC4
Locus_1006_Transcript_4/4_Confidence_0.400_Length_780	780	Locus_1006_Transcript_4/4_Confidence_0.400_Length_780	780	Locus_1006_Transcript_4/4_Confidence_0.400_Length_780	780	P59999	94.853	5.93e-85	ARPC4_MOUSE	Actin-related protein 2/3 complex subunit 4	mmu:68089	GO:0005885 \\ GO:0042995 \\ GO:0005737 \\ GO:0070062 \\ GO:0019899 \\ GO:0005200 \\ GO:0030041 \\ GO:0034314 \\	actin filament polymerization (GO:0030041);Arp2/3 complex-mediated actin nucleation (GO:0034314);	enzyme binding (GO:0019899);structural constituent of cytoskeleton (GO:0005200);	Arp2/3 protein complex (GO:0005885);cell projection (GO:0042995);cytoplasm (GO:0005737);extracellular exosome (GO:0070062);	Acetylation;Actin-binding;Cell projection;Complete proteome;Cytoplasm;Cytoskeleton;Direct protein sequencing;Reference proteome.;		0.228342	3.28407	0.792376	1	264	242	253	ARPC4
Locus_10062_Transcript_1/10_Confidence_0.346_Length_3974	3974	Locus_10062_Transcript_1/10_Confidence_0.346_Length_3974	3974	Locus_10062_Transcript_1/10_Confidence_0.346_Length_3974	3974	Q50L44	99.347	0	LIGO1_CHICK	Leucine-rich repeat and immunoglobulin-like domain-containing nogo receptor-interacting protein 1	gga:415344	GO:0016021 \\ GO:0005622 \\ GO:0005886 \\ GO:0005154 \\ GO:0007409 \\ GO:0021954 \\ GO:0048715 \\ GO:0043491 \\ GO:0007165 \\	axonogenesis (GO:0007409);central nervous system neuron development (GO:0021954);negative regulation of oligodendrocyte differentiation (GO:0048715);protein kinase B signaling (GO:0043491);signal transduction (GO:0007165);	epidermal growth factor receptor binding (GO:0005154);	integral component of membrane (GO:0016021);intracellular (GO:0005622);plasma membrane (GO:0005886);	Cell membrane;Complete proteome;Disulfide bond;Glycoprotein;Immunoglobulin domain;Leucine-rich repeat;Membrane;Reference proteome;Repeat;Signal;Transmembrane;Transmembrane helix.;		-0.290449	0.692022	0.777614	1	35	46	40.5	LIGO1
Locus_10062_Transcript_10/10_Confidence_0.462_Length_4209	4209	Locus_10062_Transcript_10/10_Confidence_0.462_Length_4209	4209	Locus_10062_Transcript_10/10_Confidence_0.462_Length_4209	4209	Q50L44	99.347	0	LIGO1_CHICK	Leucine-rich repeat and immunoglobulin-like domain-containing nogo receptor-interacting protein 1	gga:415344	GO:0016021 \\ GO:0005622 \\ GO:0005886 \\ GO:0005154 \\ GO:0007409 \\ GO:0021954 \\ GO:0048715 \\ GO:0043491 \\ GO:0007165 \\	axonogenesis (GO:0007409);central nervous system neuron development (GO:0021954);negative regulation of oligodendrocyte differentiation (GO:0048715);protein kinase B signaling (GO:0043491);signal transduction (GO:0007165);	epidermal growth factor receptor binding (GO:0005154);	integral component of membrane (GO:0016021);intracellular (GO:0005622);plasma membrane (GO:0005886);	Cell membrane;Complete proteome;Disulfide bond;Glycoprotein;Immunoglobulin domain;Leucine-rich repeat;Membrane;Reference proteome;Repeat;Signal;Transmembrane;Transmembrane helix.;		-0.460773	0.325611	0.644899	1	25	37	31	LIGO1
Locus_10062_Transcript_4/10_Confidence_0.385_Length_4350	4350	Locus_10062_Transcript_4/10_Confidence_0.385_Length_4350	4350	Locus_10062_Transcript_4/10_Confidence_0.385_Length_4350	4350	Q50L44	99.347	0	LIGO1_CHICK	Leucine-rich repeat and immunoglobulin-like domain-containing nogo receptor-interacting protein 1	gga:415344	GO:0016021 \\ GO:0005622 \\ GO:0005886 \\ GO:0005154 \\ GO:0007409 \\ GO:0021954 \\ GO:0048715 \\ GO:0043491 \\ GO:0007165 \\	axonogenesis (GO:0007409);central nervous system neuron development (GO:0021954);negative regulation of oligodendrocyte differentiation (GO:0048715);protein kinase B signaling (GO:0043491);signal transduction (GO:0007165);	epidermal growth factor receptor binding (GO:0005154);	integral component of membrane (GO:0016021);intracellular (GO:0005622);plasma membrane (GO:0005886);	Cell membrane;Complete proteome;Disulfide bond;Glycoprotein;Immunoglobulin domain;Leucine-rich repeat;Membrane;Reference proteome;Repeat;Signal;Transmembrane;Transmembrane helix.;		0.0631794	0.553465	1	1	36	37	36.5	LIGO1
Locus_10062_Transcript_6/10_Confidence_0.385_Length_4098	4098	Locus_10062_Transcript_6/10_Confidence_0.385_Length_4098	4098	Locus_10062_Transcript_6/10_Confidence_0.385_Length_4098	4098	Q50L44	99.347	0	LIGO1_CHICK	Leucine-rich repeat and immunoglobulin-like domain-containing nogo receptor-interacting protein 1	gga:415344	GO:0016021 \\ GO:0005622 \\ GO:0005886 \\ GO:0005154 \\ GO:0007409 \\ GO:0021954 \\ GO:0048715 \\ GO:0043491 \\ GO:0007165 \\	axonogenesis (GO:0007409);central nervous system neuron development (GO:0021954);negative regulation of oligodendrocyte differentiation (GO:0048715);protein kinase B signaling (GO:0043491);signal transduction (GO:0007165);	epidermal growth factor receptor binding (GO:0005154);	integral component of membrane (GO:0016021);intracellular (GO:0005622);plasma membrane (GO:0005886);	Cell membrane;Complete proteome;Disulfide bond;Glycoprotein;Immunoglobulin domain;Leucine-rich repeat;Membrane;Reference proteome;Repeat;Signal;Transmembrane;Transmembrane helix.;		-0.159383	0.167036	0.90944	1	25	30	27.5	LIGO1
Locus_10062_Transcript_7/10_Confidence_0.077_Length_1379	1379	No_sig_nr_hit	No_sig_nr_hit	No_sig_nr_hit	No_sig_nr_hit	No_Uniprotmatch	No_%_identity	No_evalue	No_ID	No_Description	No_KEGG	No_GO	No_GOCC	No_GOBP	No_GOMF	No_keywords		0.166131	-0.0978104	0.891631	1	23	22	22.5	No
Locus_10062_Transcript_8/10_Confidence_0.154_Length_2259	2259	Locus_10062_Transcript_8/10_Confidence_0.154_Length_2259	2259	Locus_10062_Transcript_8/10_Confidence_0.154_Length_2259	2259	Q5ZKF4	94.253	0	HM20A_CHICK	High mobility group protein 20A	gga:415346	GO:0005634 \\ GO:0003677 \\ GO:0006355 \\ GO:0006351 \\	regulation of transcription, DNA-templated (GO:0006355);transcription, DNA-templated (GO:0006351);	DNA binding (GO:0003677);	nucleus (GO:0005634);	Coiled coil;Complete proteome;DNA-binding;Nucleus;Reference proteome;Transcription;Transcription regulation.;		0.485845	-0.623037	0.705221	1	17	13	15	HM20A
Locus_10062_Transcript_9/10_Confidence_0.077_Length_4976	4976	Locus_10062_Transcript_9/10_Confidence_0.077_Length_4976	4976	Locus_10062_Transcript_9/10_Confidence_0.077_Length_4976	4976	Q5ZKF4	94.253	0	HM20A_CHICK	High mobility group protein 20A	gga:415346	GO:0005634 \\ GO:0003677 \\ GO:0006355 \\ GO:0006351 \\	regulation of transcription, DNA-templated (GO:0006355);transcription, DNA-templated (GO:0006351);	DNA binding (GO:0003677);	nucleus (GO:0005634);	Coiled coil;Complete proteome;DNA-binding;Nucleus;Reference proteome;Transcription;Transcription regulation.;		0.156232	3.75416	0.856628	1	358	345	351.5	HM20A
Locus_100634_Transcript_1/1_Confidence_1.000_Length_370	370	No_sig_nr_hit	No_sig_nr_hit	No_sig_nr_hit	No_sig_nr_hit	No_Uniprotmatch	No_%_identity	No_evalue	No_ID	No_Description	No_KEGG	No_GO	No_GOCC	No_GOBP	No_GOMF	No_keywords		-0.846456	-0.0491408	0.425624	1	16	31	23.5	No
Locus_10064_Transcript_1/3_Confidence_0.714_Length_3755	3755	Locus_10064_Transcript_1/3_Confidence_0.714_Length_3755	3755	Locus_10064_Transcript_1/3_Confidence_0.714_Length_3755	3755	Q56P03	64.234	2.27e-85	EAPP_HUMAN	E2F-associated phosphoprotein	hsa:55837	GO:0005737 \\ GO:0005794 \\ GO:0005634 \\ GO:0034244 \\ GO:0008284 \\ GO:0032968 \\	negative regulation of transcription elongation from RNA polymerase II promoter (GO:0034244);positive regulation of cell proliferation (GO:0008284);positive regulation of transcription elongation from RNA polymerase II promoter (GO:0032968);	No_GOMF	cytoplasm (GO:0005737);Golgi apparatus (GO:0005794);nucleus (GO:0005634);	Acetylation;Complete proteome;Cytoplasm;Nucleus;Phosphoprotein;Polymorphism;Reference proteome.;		-0.040721	2.95065	0.966139	1	191	211	201	EAPP
Locus_10064_Transcript_2/3_Confidence_0.714_Length_4532	4532	Locus_10064_Transcript_2/3_Confidence_0.714_Length_4532	4532	Locus_10064_Transcript_2/3_Confidence_0.714_Length_4532	4532	Q56P03	67.978	1.12e-43	EAPP_HUMAN	E2F-associated phosphoprotein	hsa:55837	GO:0005737 \\ GO:0005794 \\ GO:0005634 \\ GO:0034244 \\ GO:0008284 \\ GO:0032968 \\	negative regulation of transcription elongation from RNA polymerase II promoter (GO:0034244);positive regulation of cell proliferation (GO:0008284);positive regulation of transcription elongation from RNA polymerase II promoter (GO:0032968);	No_GOMF	cytoplasm (GO:0005737);Golgi apparatus (GO:0005794);nucleus (GO:0005634);	Acetylation;Complete proteome;Cytoplasm;Nucleus;Phosphoprotein;Polymorphism;Reference proteome.;		0.202928	2.61558	0.822193	1	164	153	158.5	EAPP
Locus_10065_Transcript_4/6_Confidence_0.588_Length_368	368	No_sig_nr_hit	No_sig_nr_hit	No_sig_nr_hit	No_sig_nr_hit	No_Uniprotmatch	No_%_identity	No_evalue	No_ID	No_Description	No_KEGG	No_GO	No_GOCC	No_GOBP	No_GOMF	No_keywords		0.102391	-0.0126293	0.948743	1	24	24	24	No
Locus_10065_Transcript_5/6_Confidence_0.588_Length_722	722	No_sig_nr_hit	No_sig_nr_hit	No_sig_nr_hit	No_sig_nr_hit	R7VX65	31.551	5.67e-15	R7VX65_COLLI	Uncharacterized protein {ECO:0000313|EMBL:EMC87722.1}	No_KEGG	GO:0016021 \\	No_GOBP	No_GOMF	integral component of membrane (GO:0016021);	Complete proteome {ECO:0000313|Proteomes:UP000053872};Membrane {ECO:0000256|SAM:Phobius};Transmembrane {ECO:0000256|SAM:Phobius};Transmembrane helix {ECO:0000256|SAM:Phobius}.;		-0.287111	1.73313	0.753779	1	74	97	85.5	R7VX65
Locus_10066_Transcript_1/2_Confidence_0.750_Length_3074	3074	Locus_10066_Transcript_1/2_Confidence_0.750_Length_3074	3074	Locus_10066_Transcript_1/2_Confidence_0.750_Length_3074	3074	Q5C9Z4	73.643	0	NOM1_HUMAN	Nucleolar MIF4G domain-containing protein 1	hsa:64434	GO:0005730 \\ GO:0005634 \\ GO:0044822 \\ GO:0003723 \\ GO:0022008 \\ GO:0042274 \\	neurogenesis (GO:0022008);ribosomal small subunit biogenesis (GO:0042274);	poly(A) RNA binding (GO:0044822);RNA binding (GO:0003723);	nucleolus (GO:0005730);nucleus (GO:0005634);	Complete proteome;Nucleus;Phosphoprotein;Polymorphism;Reference proteome.;		0.0518943	2.45168	0.961766	1	139	144	141.5	NOM1
Locus_10066_Transcript_2/2_Confidence_0.750_Length_3053	3053	Locus_10066_Transcript_2/2_Confidence_0.750_Length_3053	3053	Locus_10066_Transcript_2/2_Confidence_0.750_Length_3053	3053	Q5C9Z4	73.643	0	NOM1_HUMAN	Nucleolar MIF4G domain-containing protein 1	hsa:64434	GO:0005730 \\ GO:0005634 \\ GO:0044822 \\ GO:0003723 \\ GO:0022008 \\ GO:0042274 \\	neurogenesis (GO:0022008);ribosomal small subunit biogenesis (GO:0042274);	poly(A) RNA binding (GO:0044822);RNA binding (GO:0003723);	nucleolus (GO:0005730);nucleus (GO:0005634);	Complete proteome;Nucleus;Phosphoprotein;Polymorphism;Reference proteome.;		0.0254951	2.33621	0.979303	1	127	134	130.5	NOM1
Locus_10069_Transcript_1/1_Confidence_1.000_Length_2265	2265	Locus_10069_Transcript_1/1_Confidence_1.000_Length_2265	2265	Locus_10069_Transcript_1/1_Confidence_1.000_Length_2265	2265	Q4V7C9	91.304	5.62e-74	NKAP_RAT	NF-kappa-B-activating protein	rno:298342	GO:0005634 \\ GO:0003682 \\ GO:0045892 \\ GO:0007219 \\ GO:0046638 \\ GO:0006351 \\	negative regulation of transcription, DNA-templated (GO:0045892);Notch signaling pathway (GO:0007219);positive regulation of alpha-beta T cell differentiation (GO:0046638);transcription, DNA-templated (GO:0006351);	chromatin binding (GO:0003682);	nucleus (GO:0005634);	Acetylation;Complete proteome;Notch signaling pathway;Nucleus;Phosphoprotein;Reference proteome;Repressor;Transcription;Transcription regulation.;		-0.0169599	4.09143	0.987673	1	427	464	445.5	NKAP
Locus_100693_Transcript_1/1_Confidence_1.000_Length_249	249	No_sig_nr_hit	No_sig_nr_hit	No_sig_nr_hit	No_sig_nr_hit	No_Uniprotmatch	No_%_identity	No_evalue	No_ID	No_Description	No_KEGG	No_GO	No_GOCC	No_GOBP	No_GOMF	No_keywords		-0.519378	0.303032	0.602796	1	24	37	30.5	No
Locus_10070_Transcript_4/5_Confidence_0.583_Length_3748	3748	Locus_10070_Transcript_4/5_Confidence_0.583_Length_3748	3748	Locus_10070_Transcript_4/5_Confidence_0.583_Length_3748	3748	Q4U116	92.558	0	S4A4_PIG	Electrogenic sodium bicarbonate cotransporter 1	ssc:503546	GO:0016323 \\ GO:0016021 \\ GO:0008509 \\ GO:0005452 \\ GO:0008510 \\ GO:0098656 \\ GO:0015701 \\ GO:0035725 \\ GO:0006814 \\	anion transmembrane transport (GO:0098656);bicarbonate transport (GO:0015701);sodium ion transmembrane transport (GO:0035725);sodium ion transport (GO:0006814);	anion transmembrane transporter activity (GO:0008509);inorganic anion exchanger activity (GO:0005452);sodium (GO:0008510);	basolateral plasma membrane (GO:0016323);integral component of membrane (GO:0016021);	Alternative splicing;Cell membrane;Complete proteome;Disulfide bond;Glycoprotein;Ion transport;Membrane;Phosphoprotein;Reference proteome;Sodium;Sodium transport;Symport;Transmembrane;Transmembrane helix;Transport.;		-0.392143	-0.225528	0.766959	1	17	24	20.5	S4A4
Locus_10070_Transcript_5/5_Confidence_0.667_Length_3721	3721	Locus_10070_Transcript_5/5_Confidence_0.667_Length_3721	3721	Locus_10070_Transcript_5/5_Confidence_0.667_Length_3721	3721	Q4U116	92	0	S4A4_PIG	Electrogenic sodium bicarbonate cotransporter 1	ssc:503546	GO:0016323 \\ GO:0016021 \\ GO:0008509 \\ GO:0005452 \\ GO:0008510 \\ GO:0098656 \\ GO:0015701 \\ GO:0035725 \\ GO:0006814 \\	anion transmembrane transport (GO:0098656);bicarbonate transport (GO:0015701);sodium ion transmembrane transport (GO:0035725);sodium ion transport (GO:0006814);	anion transmembrane transporter activity (GO:0008509);inorganic anion exchanger activity (GO:0005452);sodium (GO:0008510);	basolateral plasma membrane (GO:0016323);integral component of membrane (GO:0016021);	Alternative splicing;Cell membrane;Complete proteome;Disulfide bond;Glycoprotein;Ion transport;Membrane;Phosphoprotein;Reference proteome;Sodium;Sodium transport;Symport;Transmembrane;Transmembrane helix;Transport.;		0.00977522	0.33047	1	1	30	32	31	S4A4
Locus_10071_Transcript_4/10_Confidence_0.360_Length_1742	1742	Locus_10071_Transcript_4/10_Confidence_0.360_Length_1742	1742	Locus_10071_Transcript_4/10_Confidence_0.360_Length_1742	1742	Q8CCK0	89.531	3.87e-157	H2AW_MOUSE	Core histone macro-H2A.2	mmu:404634	GO:0001740 \\ GO:0035098 \\ GO:0070062 \\ GO:0000790 \\ GO:0000784 \\ GO:0005654 \\ GO:0000786 \\ GO:0031490 \\ GO:0003677 \\ GO:0000977 \\ GO:0044212 \\ GO:0007420 \\ GO:0016568 \\ GO:0006342 \\ GO:0007549 \\ GO:0071169 \\ GO:0045814 \\ GO:0000122 \\ GO:1901837 \\ GO:0006334 \\ GO:0045618 \\	brain development (GO:0007420);chromatin modification (GO:0016568);chromatin silencing (GO:0006342);dosage compensation (GO:0007549);establishment of protein localization to chromatin (GO:0071169);negative regulation of gene expression, epigenetic (GO:0045814);negative regulation of transcription from RNA polymerase II promoter (GO:0000122);negative regulation of transcription of nuclear large rR…	chromatin DNA binding (GO:0031490);DNA binding (GO:0003677);RNA polymerase II regulatory region sequence-specific DNA binding (GO:0000977);transcription regulatory region DNA binding (GO:0044212);	Barr body (GO:0001740);ESC/E(Z) complex (GO:0035098);extracellular exosome (GO:0070062);nuclear chromatin (GO:0000790);nuclear chromosome, telomeric region (GO:0000784);nucleoplasm (GO:0005654);nucleosome (GO:0000786);	Chromatin regulator;Chromosome;Complete proteome;DNA-binding;Isopeptide bond;Nucleosome core;Nucleus;Reference proteome;Ubl conjugation.;		0.408853	-0.0378255	0.693346	1	26	21	23.5	H2AW
Locus_10071_Transcript_5/10_Confidence_0.400_Length_1787	1787	Locus_10071_Transcript_5/10_Confidence_0.400_Length_1787	1787	Locus_10071_Transcript_5/10_Confidence_0.400_Length_1787	1787	Q8CCK0	74.098	1.34e-129	H2AW_MOUSE	Core histone macro-H2A.2	mmu:404634	GO:0001740 \\ GO:0035098 \\ GO:0070062 \\ GO:0000790 \\ GO:0000784 \\ GO:0005654 \\ GO:0000786 \\ GO:0031490 \\ GO:0003677 \\ GO:0000977 \\ GO:0044212 \\ GO:0007420 \\ GO:0016568 \\ GO:0006342 \\ GO:0007549 \\ GO:0071169 \\ GO:0045814 \\ GO:0000122 \\ GO:1901837 \\ GO:0006334 \\ GO:0045618 \\	brain development (GO:0007420);chromatin modification (GO:0016568);chromatin silencing (GO:0006342);dosage compensation (GO:0007549);establishment of protein localization to chromatin (GO:0071169);negative regulation of gene expression, epigenetic (GO:0045814);negative regulation of transcription from RNA polymerase II promoter (GO:0000122);negative regulation of transcription of nuclear large rR…	chromatin DNA binding (GO:0031490);DNA binding (GO:0003677);RNA polymerase II regulatory region sequence-specific DNA binding (GO:0000977);transcription regulatory region DNA binding (GO:0044212);	Barr body (GO:0001740);ESC/E(Z) complex (GO:0035098);extracellular exosome (GO:0070062);nuclear chromatin (GO:0000790);nuclear chromosome, telomeric region (GO:0000784);nucleoplasm (GO:0005654);nucleosome (GO:0000786);	Chromatin regulator;Chromosome;Complete proteome;DNA-binding;Isopeptide bond;Nucleosome core;Nucleus;Reference proteome;Ubl conjugation.;		-0.354928	0.213158	0.740627	1	24	33	28.5	H2AW
Locus_10071_Transcript_6/10_Confidence_0.400_Length_1917	1917	Locus_10071_Transcript_6/10_Confidence_0.400_Length_1917	1917	Locus_10071_Transcript_6/10_Confidence_0.400_Length_1917	1917	Q8CCK0	90.678	0	H2AW_MOUSE	Core histone macro-H2A.2	mmu:404634	GO:0001740 \\ GO:0035098 \\ GO:0070062 \\ GO:0000790 \\ GO:0000784 \\ GO:0005654 \\ GO:0000786 \\ GO:0031490 \\ GO:0003677 \\ GO:0000977 \\ GO:0044212 \\ GO:0007420 \\ GO:0016568 \\ GO:0006342 \\ GO:0007549 \\ GO:0071169 \\ GO:0045814 \\ GO:0000122 \\ GO:1901837 \\ GO:0006334 \\ GO:0045618 \\	brain development (GO:0007420);chromatin modification (GO:0016568);chromatin silencing (GO:0006342);dosage compensation (GO:0007549);establishment of protein localization to chromatin (GO:0071169);negative regulation of gene expression, epigenetic (GO:0045814);negative regulation of transcription from RNA polymerase II promoter (GO:0000122);negative regulation of transcription of nuclear large rR…	chromatin DNA binding (GO:0031490);DNA binding (GO:0003677);RNA polymerase II regulatory region sequence-specific DNA binding (GO:0000977);transcription regulatory region DNA binding (GO:0044212);	Barr body (GO:0001740);ESC/E(Z) complex (GO:0035098);extracellular exosome (GO:0070062);nuclear chromatin (GO:0000790);nuclear chromosome, telomeric region (GO:0000784);nucleoplasm (GO:0005654);nucleosome (GO:0000786);	Chromatin regulator;Chromosome;Complete proteome;DNA-binding;Isopeptide bond;Nucleosome core;Nucleus;Reference proteome;Ubl conjugation.;		-0.561208	-0.133997	0.625008	1	17	27	22	H2AW
Locus_10072_Transcript_1/1_Confidence_1.000_Length_1975	1975	Locus_10072_Transcript_1/1_Confidence_1.000_Length_1975	1975	Locus_10072_Transcript_1/1_Confidence_1.000_Length_1975	1975	Q8BHN9	39.683	8.59e-37	CN079_MOUSE	Uncharacterized protein C14orf79 homolog	mmu:217887	GO:0005737 \\ GO:0030276 \\ GO:0046907 \\	intracellular transport (GO:0046907);	clathrin binding (GO:0030276);	cytoplasm (GO:0005737);	Complete proteome;Reference proteome.;		-0.698877	-0.509802	0.516915	1	12	21	16.5	CN079
Locus_10073_Transcript_1/4_Confidence_0.600_Length_2824	2824	Locus_10073_Transcript_1/4_Confidence_0.600_Length_2824	2824	Locus_10073_Transcript_1/4_Confidence_0.600_Length_2824	2824	Q8VEI3	56.89	2.46e-66	HYAL3_MOUSE	Hyaluronidase-3	mmu:109685	GO:0031410 \\ GO:0005576 \\ GO:0005764 \\ GO:0033906 \\ GO:0004415 \\ GO:0005975 \\ GO:0051216 \\ GO:0071347 \\ GO:0071356 \\ GO:0071493 \\ GO:0030214 \\ GO:0006954 \\ GO:0046677 \\ GO:0009615 \\	carbohydrate metabolic process (GO:0005975);cartilage development (GO:0051216);cellular response to interleukin-1 (GO:0071347);cellular response to tumor necrosis factor (GO:0071356);cellular response to UV-B (GO:0071493);hyaluronan catabolic process (GO:0030214);inflammatory response (GO:0006954);response to antibiotic (GO:0046677);response to virus (GO:0009615);	hyaluronoglucuronidase activity (GO:0033906);hyalurononglucosaminidase activity (GO:0004415);	cytoplasmic vesicle (GO:0031410);extracellular region (GO:0005576);lysosome (GO:0005764);	Complete proteome;Disulfide bond;EGF-like domain;Glycoprotein;Glycosidase;Hydrolase;Lysosome;Reference proteome;Secreted;Signal.;		0.0503422	1.11951	0.976185	1	54	56	55	HYAL3
Locus_10073_Transcript_2/4_Confidence_0.700_Length_2610	2610	Locus_10073_Transcript_2/4_Confidence_0.700_Length_2610	2610	Locus_10073_Transcript_2/4_Confidence_0.700_Length_2610	2610	Q8VEI3	57.743	3.69e-109	HYAL3_MOUSE	Hyaluronidase-3	mmu:109685	GO:0031410 \\ GO:0005576 \\ GO:0005764 \\ GO:0033906 \\ GO:0004415 \\ GO:0005975 \\ GO:0051216 \\ GO:0071347 \\ GO:0071356 \\ GO:0071493 \\ GO:0030214 \\ GO:0006954 \\ GO:0046677 \\ GO:0009615 \\	carbohydrate metabolic process (GO:0005975);cartilage development (GO:0051216);cellular response to interleukin-1 (GO:0071347);cellular response to tumor necrosis factor (GO:0071356);cellular response to UV-B (GO:0071493);hyaluronan catabolic process (GO:0030214);inflammatory response (GO:0006954);response to antibiotic (GO:0046677);response to virus (GO:0009615);	hyaluronoglucuronidase activity (GO:0033906);hyalurononglucosaminidase activity (GO:0004415);	cytoplasmic vesicle (GO:0031410);extracellular region (GO:0005576);lysosome (GO:0005764);	Complete proteome;Disulfide bond;EGF-like domain;Glycoprotein;Glycosidase;Hydrolase;Lysosome;Reference proteome;Secreted;Signal.;		-0.337002	1.36896	0.722753	1	56	76	66	HYAL3
Locus_10073_Transcript_3/4_Confidence_0.700_Length_2694	2694	Locus_10073_Transcript_3/4_Confidence_0.700_Length_2694	2694	Locus_10073_Transcript_3/4_Confidence_0.700_Length_2694	2694	Q8VEI3	54.034	8.74e-104	HYAL3_MOUSE	Hyaluronidase-3	mmu:109685	GO:0031410 \\ GO:0005576 \\ GO:0005764 \\ GO:0033906 \\ GO:0004415 \\ GO:0005975 \\ GO:0051216 \\ GO:0071347 \\ GO:0071356 \\ GO:0071493 \\ GO:0030214 \\ GO:0006954 \\ GO:0046677 \\ GO:0009615 \\	carbohydrate metabolic process (GO:0005975);cartilage development (GO:0051216);cellular response to interleukin-1 (GO:0071347);cellular response to tumor necrosis factor (GO:0071356);cellular response to UV-B (GO:0071493);hyaluronan catabolic process (GO:0030214);inflammatory response (GO:0006954);response to antibiotic (GO:0046677);response to virus (GO:0009615);	hyaluronoglucuronidase activity (GO:0033906);hyalurononglucosaminidase activity (GO:0004415);	cytoplasmic vesicle (GO:0031410);extracellular region (GO:0005576);lysosome (GO:0005764);	Complete proteome;Disulfide bond;EGF-like domain;Glycoprotein;Glycosidase;Hydrolase;Lysosome;Reference proteome;Secreted;Signal.;		0.00979488	1.2861	1	1	60	64	62	HYAL3
Locus_10075_Transcript_2/4_Confidence_0.286_Length_1185	1185	Locus_10075_Transcript_2/4_Confidence_0.286_Length_1185	1185	Locus_10075_Transcript_2/4_Confidence_0.286_Length_1185	1185	Q8AY68	97.561	1.61e-17	SHC1_XENLA	SHC-transforming protein 1	xla:399198	GO:0005737 \\ GO:0001525 \\ GO:0035556 \\ GO:0040008 \\	angiogenesis (GO:0001525);intracellular signal transduction (GO:0035556);regulation of growth (GO:0040008);	No_GOMF	cytoplasm (GO:0005737);	Cytoplasm;Growth regulation;SH2 domain.;		0.24229	3.42697	0.778313	1	293	266	279.5	SHC1
Locus_10075_Transcript_3/4_Confidence_0.429_Length_4504	4504	Locus_10075_Transcript_3/4_Confidence_0.429_Length_4504	4504	Locus_10075_Transcript_3/4_Confidence_0.429_Length_4504	4504	Q8AY68	82.816	0	SHC1_XENLA	SHC-transforming protein 1	xla:399198	GO:0005737 \\ GO:0001525 \\ GO:0035556 \\ GO:0040008 \\	angiogenesis (GO:0001525);intracellular signal transduction (GO:0035556);regulation of growth (GO:0040008);	No_GOMF	cytoplasm (GO:0005737);	Cytoplasm;Growth regulation;SH2 domain.;		0.00263088	5.13621	0.998975	1	889	953	921	SHC1
Locus_10075_Transcript_4/4_Confidence_0.571_Length_2884	2884	Locus_10075_Transcript_4/4_Confidence_0.571_Length_2884	2884	Locus_10075_Transcript_4/4_Confidence_0.571_Length_2884	2884	Q8AY68	82.816	0	SHC1_XENLA	SHC-transforming protein 1	xla:399198	GO:0005737 \\ GO:0001525 \\ GO:0035556 \\ GO:0040008 \\	angiogenesis (GO:0001525);intracellular signal transduction (GO:0035556);regulation of growth (GO:0040008);	No_GOMF	cytoplasm (GO:0005737);	Cytoplasm;Growth regulation;SH2 domain.;		0.0316378	4.91497	0.972096	1	770	809	789.5	SHC1
Locus_100762_Transcript_1/1_Confidence_1.000_Length_750	750	Locus_100762_Transcript_1/1_Confidence_1.000_Length_750	750	Locus_100762_Transcript_1/1_Confidence_1.000_Length_750	750	No_Uniprotmatch	No_%_identity	No_evalue	No_ID	No_Description	No_KEGG	No_GO	No_GOCC	No_GOBP	No_GOMF	No_keywords		-0.10957	3.3822	0.899539	1	252	292	272	No
Locus_100764_Transcript_1/1_Confidence_1.000_Length_671	671	Locus_100764_Transcript_1/1_Confidence_1.000_Length_671	671	Locus_100764_Transcript_1/1_Confidence_1.000_Length_671	671	No_Uniprotmatch	No_%_identity	No_evalue	No_ID	No_Description	No_KEGG	No_GO	No_GOCC	No_GOBP	No_GOMF	No_keywords		-0.889098	-0.632774	0.418096	1	10	20	15	No
Locus_10077_Transcript_1/6_Confidence_0.400_Length_938	938	Locus_10077_Transcript_1/6_Confidence_0.400_Length_938	938	Locus_10077_Transcript_1/6_Confidence_0.400_Length_938	938	Q9CXK4	55.155	4.38e-50	SWET1_MOUSE	Sugar transporter SWEET1	mmu:19729	GO:0005794 \\ GO:0000139 \\ GO:0016021 \\ GO:0005634 \\ GO:0005886 \\ GO:0042947 \\ GO:0051119 \\ GO:0034219 \\ GO:0008643 \\ GO:0042946 \\ GO:0045815 \\	carbohydrate transmembrane transport (GO:0034219);carbohydrate transport (GO:0008643);glucoside transport (GO:0042946);positive regulation of gene expression, epigenetic (GO:0045815);	glucoside transmembrane transporter activity (GO:0042947);sugar transmembrane transporter activity (GO:0051119);	Golgi apparatus (GO:0005794);Golgi membrane (GO:0000139);integral component of membrane (GO:0016021);nucleus (GO:0005634);plasma membrane (GO:0005886);	Cell membrane;Complete proteome;Golgi apparatus;Membrane;Reference proteome;Repeat;Sugar transport;Transmembrane;Transmembrane helix;Transport.;		-0.410113	0.451495	0.672252	1	28	40	34	SWET1
Locus_10077_Transcript_2/6_Confidence_0.333_Length_779	779	Locus_10077_Transcript_2/6_Confidence_0.333_Length_779	779	Locus_10077_Transcript_2/6_Confidence_0.333_Length_779	779	Q9CXK4	76.119	9.83e-27	SWET1_MOUSE	Sugar transporter SWEET1	mmu:19729	GO:0005794 \\ GO:0000139 \\ GO:0016021 \\ GO:0005634 \\ GO:0005886 \\ GO:0042947 \\ GO:0051119 \\ GO:0034219 \\ GO:0008643 \\ GO:0042946 \\ GO:0045815 \\	carbohydrate transmembrane transport (GO:0034219);carbohydrate transport (GO:0008643);glucoside transport (GO:0042946);positive regulation of gene expression, epigenetic (GO:0045815);	glucoside transmembrane transporter activity (GO:0042947);sugar transmembrane transporter activity (GO:0051119);	Golgi apparatus (GO:0005794);Golgi membrane (GO:0000139);integral component of membrane (GO:0016021);nucleus (GO:0005634);plasma membrane (GO:0005886);	Cell membrane;Complete proteome;Golgi apparatus;Membrane;Reference proteome;Repeat;Sugar transport;Transmembrane;Transmembrane helix;Transport.;		-0.0893481	0.285052	0.958105	1	28	32	30	SWET1
Locus_10077_Transcript_3/6_Confidence_0.467_Length_1124	1124	Locus_10077_Transcript_3/6_Confidence_0.467_Length_1124	1124	Locus_10077_Transcript_3/6_Confidence_0.467_Length_1124	1124	Q9CXK4	60.185	7.01e-71	SWET1_MOUSE	Sugar transporter SWEET1	mmu:19729	GO:0005794 \\ GO:0000139 \\ GO:0016021 \\ GO:0005634 \\ GO:0005886 \\ GO:0042947 \\ GO:0051119 \\ GO:0034219 \\ GO:0008643 \\ GO:0042946 \\ GO:0045815 \\	carbohydrate transmembrane transport (GO:0034219);carbohydrate transport (GO:0008643);glucoside transport (GO:0042946);positive regulation of gene expression, epigenetic (GO:0045815);	glucoside transmembrane transporter activity (GO:0042947);sugar transmembrane transporter activity (GO:0051119);	Golgi apparatus (GO:0005794);Golgi membrane (GO:0000139);integral component of membrane (GO:0016021);nucleus (GO:0005634);plasma membrane (GO:0005886);	Cell membrane;Complete proteome;Golgi apparatus;Membrane;Reference proteome;Repeat;Sugar transport;Transmembrane;Transmembrane helix;Transport.;		-0.141887	1.21487	0.888911	1	54	64	59	SWET1
Locus_10077_Transcript_4/6_Confidence_0.600_Length_1068	1068	Locus_10077_Transcript_4/6_Confidence_0.600_Length_1068	1068	Locus_10077_Transcript_4/6_Confidence_0.600_Length_1068	1068	Q9CXK4	61.14	7.65e-62	SWET1_MOUSE	Sugar transporter SWEET1	mmu:19729	GO:0005794 \\ GO:0000139 \\ GO:0016021 \\ GO:0005634 \\ GO:0005886 \\ GO:0042947 \\ GO:0051119 \\ GO:0034219 \\ GO:0008643 \\ GO:0042946 \\ GO:0045815 \\	carbohydrate transmembrane transport (GO:0034219);carbohydrate transport (GO:0008643);glucoside transport (GO:0042946);positive regulation of gene expression, epigenetic (GO:0045815);	glucoside transmembrane transporter activity (GO:0042947);sugar transmembrane transporter activity (GO:0051119);	Golgi apparatus (GO:0005794);Golgi membrane (GO:0000139);integral component of membrane (GO:0016021);nucleus (GO:0005634);plasma membrane (GO:0005886);	Cell membrane;Complete proteome;Golgi apparatus;Membrane;Reference proteome;Repeat;Sugar transport;Transmembrane;Transmembrane helix;Transport.;		0.0171517	1.00043	1	1	49	52	50.5	SWET1
Locus_10077_Transcript_5/6_Confidence_0.533_Length_1314	1314	Locus_10077_Transcript_5/6_Confidence_0.533_Length_1314	1314	Locus_10077_Transcript_5/6_Confidence_0.533_Length_1314	1314	Q9CXK4	50.556	2.43e-45	SWET1_MOUSE	Sugar transporter SWEET1	mmu:19729	GO:0005794 \\ GO:0000139 \\ GO:0016021 \\ GO:0005634 \\ GO:0005886 \\ GO:0042947 \\ GO:0051119 \\ GO:0034219 \\ GO:0008643 \\ GO:0042946 \\ GO:0045815 \\	carbohydrate transmembrane transport (GO:0034219);carbohydrate transport (GO:0008643);glucoside transport (GO:0042946);positive regulation of gene expression, epigenetic (GO:0045815);	glucoside transmembrane transporter activity (GO:0042947);sugar transmembrane transporter activity (GO:0051119);	Golgi apparatus (GO:0005794);Golgi membrane (GO:0000139);integral component of membrane (GO:0016021);nucleus (GO:0005634);plasma membrane (GO:0005886);	Cell membrane;Complete proteome;Golgi apparatus;Membrane;Reference proteome;Repeat;Sugar transport;Transmembrane;Transmembrane helix;Transport.;		-0.236027	1.12846	0.812617	1	49	62	55.5	SWET1
Locus_10078_Transcript_1/2_Confidence_0.750_Length_927	927	Locus_10078_Transcript_1/2_Confidence_0.750_Length_927	927	Locus_10078_Transcript_1/2_Confidence_0.750_Length_927	927	P52912	84.887	6.63e-178	TIA1_MOUSE	Nucleolysin TIA-1	No_KEGG	GO:0005737 \\ GO:0010494 \\ GO:0097165 \\ GO:0005654 \\ GO:0005634 \\ GO:0017091 \\ GO:0000166 \\ GO:0044822 \\ GO:0006915 \\ GO:0042036 \\ GO:0017148 \\ GO:1904037 \\ GO:0048024 \\	apoptotic process (GO:0006915);negative regulation of cytokine biosynthetic process (GO:0042036);negative regulation of translation (GO:0017148);positive regulation of epithelial cell apoptotic process (GO:1904037);regulation of mRNA splicing, via spliceosome (GO:0048024);	AU-rich element binding (GO:0017091);nucleotide binding (GO:0000166);poly(A) RNA binding (GO:0044822);	cytoplasm (GO:0005737);cytoplasmic stress granule (GO:0010494);nuclear stress granule (GO:0097165);nucleoplasm (GO:0005654);nucleus (GO:0005634);	3D-structure;Acetylation;Apoptosis;Complete proteome;Nucleus;Reference proteome;Repeat;RNA-binding.;		-0.201282	3.4016	0.817477	1	247	305	276	TIA1
Locus_10079_Transcript_1/10_Confidence_0.391_Length_3351	3351	Locus_10079_Transcript_1/10_Confidence_0.391_Length_3351	3351	Locus_10079_Transcript_1/10_Confidence_0.391_Length_3351	3351	Q91WG5	96.466	0	AAKG2_MOUSE	5'-AMP-activated protein kinase subunit gamma-2	No_KEGG	GO:0005829 \\ GO:0005615 \\ GO:0005654 \\ GO:0031588 \\ GO:0043531 \\ GO:0016208 \\ GO:0004679 \\ GO:0005524 \\ GO:0004862 \\ GO:0008603 \\ GO:0008607 \\ GO:0030295 \\ GO:0019901 \\ GO:0032147 \\ GO:0006633 \\ GO:0005977 \\ GO:0035556 \\ GO:0006469 \\ GO:0071901 \\ GO:0010800 \\ GO:0045860 \\ GO:0019217 \\ GO:0006110 \\	activation of protein kinase activity (GO:0032147);fatty acid biosynthetic process (GO:0006633);glycogen metabolic process (GO:0005977);intracellular signal transduction (GO:0035556);negative regulation of protein kinase activity (GO:0006469);negative regulation of protein serine/threonine kinase activity (GO:0071901);positive regulation of peptidyl-threonine phosphorylation (GO:0010800);positive…	ADP binding (GO:0043531);AMP binding (GO:0016208);AMP-activated protein kinase activity (GO:0004679);ATP binding (GO:0005524);cAMP-dependent protein kinase inhibitor activity (GO:0004862);cAMP-dependent protein kinase regulator activity (GO:0008603);phosphorylase kinase regulator activity (GO:0008607);protein kinase activator activity (GO:0030295);protein kinase binding (GO:0019901);	cytosol (GO:0005829);extracellular space (GO:0005615);nucleoplasm (GO:0005654);nucleotide-activated protein kinase complex (GO:0031588);	Alternative splicing;ATP-binding;CBS domain;Complete proteome;Fatty acid biosynthesis;Fatty acid metabolism;Lipid biosynthesis;Lipid metabolism;Nucleotide-binding;Phosphoprotein;Reference proteome;Repeat.;		0.102909	5.01398	0.902461	1	845	845	845	AAKG2
Locus_10079_Transcript_10/10_Confidence_0.565_Length_4013	4013	Locus_10079_Transcript_10/10_Confidence_0.565_Length_4013	4013	Locus_10079_Transcript_10/10_Confidence_0.565_Length_4013	4013	Q9UGJ0	86.355	0	AAKG2_HUMAN	5'-AMP-activated protein kinase subunit gamma-2	hsa:51422	GO:0005829 \\ GO:0005615 \\ GO:0005654 \\ GO:0031588 \\ GO:0043531 \\ GO:0016208 \\ GO:0004679 \\ GO:0005524 \\ GO:0004862 \\ GO:0008603 \\ GO:0008607 \\ GO:0030295 \\ GO:0019901 \\ GO:0032147 \\ GO:0006754 \\ GO:0006853 \\ GO:0007050 \\ GO:0044255 \\ GO:0006112 \\ GO:0006633 \\ GO:0010467 \\ GO:0005977 \\ GO:0008286 \\ GO:0035556 \\ GO:0016236 \\ GO:0061024 \\ GO:0007005 \\ GO:0006469 \\ GO:0071…	activation of protein kinase activity (GO:0032147);ATP biosynthetic process (GO:0006754);carnitine shuttle (GO:0006853);cell cycle arrest (GO:0007050);cellular lipid metabolic process (GO:0044255);energy reserve metabolic process (GO:0006112);fatty acid biosynthetic process (GO:0006633);gene expression (GO:0010467);glycogen metabolic process (GO:0005977);insulin receptor signaling pathway (GO:000…	ADP binding (GO:0043531);AMP binding (GO:0016208);AMP-activated protein kinase activity (GO:0004679);ATP binding (GO:0005524);cAMP-dependent protein kinase inhibitor activity (GO:0004862);cAMP-dependent protein kinase regulator activity (GO:0008603);phosphorylase kinase regulator activity (GO:0008607);protein kinase activator activity (GO:0030295);protein kinase binding (GO:0019901);	cytosol (GO:0005829);extracellular space (GO:0005615);nucleoplasm (GO:0005654);nucleotide-activated protein kinase complex (GO:0031588);	Alternative splicing;ATP-binding;Cardiomyopathy;CBS domain;Complete proteome;Disease mutation;Fatty acid biosynthesis;Fatty acid metabolism;Glycogen storage disease;Lipid biosynthesis;Lipid metabolism;Nucleotide-binding;Phosphoprotein;Polymorphism;Reference proteome;Repeat.;		-0.0205564	5.22813	0.981777	1	940	1024	982	AAKG2
Locus_10079_Transcript_5/10_Confidence_0.565_Length_4108	4108	Locus_10079_Transcript_5/10_Confidence_0.565_Length_4108	4108	Locus_10079_Transcript_5/10_Confidence_0.565_Length_4108	4108	Q91WG5	94.318	5.5e-165	AAKG2_MOUSE	5'-AMP-activated protein kinase subunit gamma-2	No_KEGG	GO:0005829 \\ GO:0005615 \\ GO:0005654 \\ GO:0031588 \\ GO:0043531 \\ GO:0016208 \\ GO:0004679 \\ GO:0005524 \\ GO:0004862 \\ GO:0008603 \\ GO:0008607 \\ GO:0030295 \\ GO:0019901 \\ GO:0032147 \\ GO:0006633 \\ GO:0005977 \\ GO:0035556 \\ GO:0006469 \\ GO:0071901 \\ GO:0010800 \\ GO:0045860 \\ GO:0019217 \\ GO:0006110 \\	activation of protein kinase activity (GO:0032147);fatty acid biosynthetic process (GO:0006633);glycogen metabolic process (GO:0005977);intracellular signal transduction (GO:0035556);negative regulation of protein kinase activity (GO:0006469);negative regulation of protein serine/threonine kinase activity (GO:0071901);positive regulation of peptidyl-threonine phosphorylation (GO:0010800);positive…	ADP binding (GO:0043531);AMP binding (GO:0016208);AMP-activated protein kinase activity (GO:0004679);ATP binding (GO:0005524);cAMP-dependent protein kinase inhibitor activity (GO:0004862);cAMP-dependent protein kinase regulator activity (GO:0008603);phosphorylase kinase regulator activity (GO:0008607);protein kinase activator activity (GO:0030295);protein kinase binding (GO:0019901);	cytosol (GO:0005829);extracellular space (GO:0005615);nucleoplasm (GO:0005654);nucleotide-activated protein kinase complex (GO:0031588);	Alternative splicing;ATP-binding;CBS domain;Complete proteome;Fatty acid biosynthesis;Fatty acid metabolism;Lipid biosynthesis;Lipid metabolism;Nucleotide-binding;Phosphoprotein;Reference proteome;Repeat.;		-0.0588674	5.20083	0.945254	1	910	1018	964	AAKG2
Locus_10079_Transcript_6/10_Confidence_0.478_Length_2338	2338	Locus_10079_Transcript_6/10_Confidence_0.478_Length_2338	2338	Locus_10079_Transcript_6/10_Confidence_0.478_Length_2338	2338	Q9UGJ0	86.355	0	AAKG2_HUMAN	5'-AMP-activated protein kinase subunit gamma-2	hsa:51422	GO:0005829 \\ GO:0005615 \\ GO:0005654 \\ GO:0031588 \\ GO:0043531 \\ GO:0016208 \\ GO:0004679 \\ GO:0005524 \\ GO:0004862 \\ GO:0008603 \\ GO:0008607 \\ GO:0030295 \\ GO:0019901 \\ GO:0032147 \\ GO:0006754 \\ GO:0006853 \\ GO:0007050 \\ GO:0044255 \\ GO:0006112 \\ GO:0006633 \\ GO:0010467 \\ GO:0005977 \\ GO:0008286 \\ GO:0035556 \\ GO:0016236 \\ GO:0061024 \\ GO:0007005 \\ GO:0006469 \\ GO:0071…	activation of protein kinase activity (GO:0032147);ATP biosynthetic process (GO:0006754);carnitine shuttle (GO:0006853);cell cycle arrest (GO:0007050);cellular lipid metabolic process (GO:0044255);energy reserve metabolic process (GO:0006112);fatty acid biosynthetic process (GO:0006633);gene expression (GO:0010467);glycogen metabolic process (GO:0005977);insulin receptor signaling pathway (GO:000…	ADP binding (GO:0043531);AMP binding (GO:0016208);AMP-activated protein kinase activity (GO:0004679);ATP binding (GO:0005524);cAMP-dependent protein kinase inhibitor activity (GO:0004862);cAMP-dependent protein kinase regulator activity (GO:0008603);phosphorylase kinase regulator activity (GO:0008607);protein kinase activator activity (GO:0030295);protein kinase binding (GO:0019901);	cytosol (GO:0005829);extracellular space (GO:0005615);nucleoplasm (GO:0005654);nucleotide-activated protein kinase complex (GO:0031588);	Alternative splicing;ATP-binding;Cardiomyopathy;CBS domain;Complete proteome;Disease mutation;Fatty acid biosynthesis;Fatty acid metabolism;Glycogen storage disease;Lipid biosynthesis;Lipid metabolism;Nucleotide-binding;Phosphoprotein;Polymorphism;Reference proteome;Repeat.;		0.212408	4.10336	0.803015	1	465	431	448	AAKG2
Locus_10079_Transcript_7/10_Confidence_0.174_Length_2504	2504	No_sig_nr_hit	No_sig_nr_hit	No_sig_nr_hit	No_sig_nr_hit	No_Uniprotmatch	No_%_identity	No_evalue	No_ID	No_Description	No_KEGG	No_GO	No_GOCC	No_GOBP	No_GOMF	No_keywords		0.0206089	4.37776	0.98228	1	528	559	543.5	No
Locus_10079_Transcript_9/10_Confidence_0.478_Length_4041	4041	Locus_10079_Transcript_9/10_Confidence_0.478_Length_4041	4041	Locus_10079_Transcript_9/10_Confidence_0.478_Length_4041	4041	Q9UGJ0	87.407	0	AAKG2_HUMAN	5'-AMP-activated protein kinase subunit gamma-2	hsa:51422	GO:0005829 \\ GO:0005615 \\ GO:0005654 \\ GO:0031588 \\ GO:0043531 \\ GO:0016208 \\ GO:0004679 \\ GO:0005524 \\ GO:0004862 \\ GO:0008603 \\ GO:0008607 \\ GO:0030295 \\ GO:0019901 \\ GO:0032147 \\ GO:0006754 \\ GO:0006853 \\ GO:0007050 \\ GO:0044255 \\ GO:0006112 \\ GO:0006633 \\ GO:0010467 \\ GO:0005977 \\ GO:0008286 \\ GO:0035556 \\ GO:0016236 \\ GO:0061024 \\ GO:0007005 \\ GO:0006469 \\ GO:0071…	activation of protein kinase activity (GO:0032147);ATP biosynthetic process (GO:0006754);carnitine shuttle (GO:0006853);cell cycle arrest (GO:0007050);cellular lipid metabolic process (GO:0044255);energy reserve metabolic process (GO:0006112);fatty acid biosynthetic process (GO:0006633);gene expression (GO:0010467);glycogen metabolic process (GO:0005977);insulin receptor signaling pathway (GO:000…	ADP binding (GO:0043531);AMP binding (GO:0016208);AMP-activated protein kinase activity (GO:0004679);ATP binding (GO:0005524);cAMP-dependent protein kinase inhibitor activity (GO:0004862);cAMP-dependent protein kinase regulator activity (GO:0008603);phosphorylase kinase regulator activity (GO:0008607);protein kinase activator activity (GO:0030295);protein kinase binding (GO:0019901);	cytosol (GO:0005829);extracellular space (GO:0005615);nucleoplasm (GO:0005654);nucleotide-activated protein kinase complex (GO:0031588);	Alternative splicing;ATP-binding;Cardiomyopathy;CBS domain;Complete proteome;Disease mutation;Fatty acid biosynthesis;Fatty acid metabolism;Glycogen storage disease;Lipid biosynthesis;Lipid metabolism;Nucleotide-binding;Phosphoprotein;Polymorphism;Reference proteome;Repeat.;		0.00307119	5.58466	0.998155	1	1214	1301	1257.5	AAKG2
Locus_10080_Transcript_1/5_Confidence_0.583_Length_3001	3001	Locus_10080_Transcript_1/5_Confidence_0.583_Length_3001	3001	Locus_10080_Transcript_1/5_Confidence_0.583_Length_3001	3001	Q9C0B0	69.066	0	UNK_HUMAN	RING finger protein unkempt homolog	hsa:85451	GO:0005737 \\ GO:1990715 \\ GO:0044822 \\ GO:0008270 \\ GO:0048667 \\ GO:2000766 \\ GO:0001764 \\	cell morphogenesis involved in neuron differentiation (GO:0048667);negative regulation of cytoplasmic translation (GO:2000766);neuron migration (GO:0001764);	mRNA CDS binding (GO:1990715);poly(A) RNA binding (GO:0044822);zinc ion binding (GO:0008270);	cytoplasm (GO:0005737);	Coiled coil;Complete proteome;Cytoplasm;Metal-binding;Phosphoprotein;Reference proteome;Repeat;Repressor;RNA-binding;Translation regulation;Zinc;Zinc-finger.;		0.340368	-0.90451	0.906907	1	13	11	12	UNK
Locus_10080_Transcript_2/5_Confidence_0.667_Length_3250	3250	Locus_10080_Transcript_2/5_Confidence_0.667_Length_3250	3250	Locus_10080_Transcript_2/5_Confidence_0.667_Length_3250	3250	Q6EE22	87.484	0	UNK_CANLF	RING finger protein unkempt homolog	cfa:444855	GO:0005737 \\ GO:0003723 \\ GO:0008270 \\ GO:0048667 \\ GO:0006417 \\	cell morphogenesis involved in neuron differentiation (GO:0048667);regulation of translation (GO:0006417);	RNA binding (GO:0003723);zinc ion binding (GO:0008270);	cytoplasm (GO:0005737);	Coiled coil;Complete proteome;Cytoplasm;Metal-binding;Phosphoprotein;Reference proteome;Repeat;Repressor;RNA-binding;Translation regulation;Zinc;Zinc-finger.;		0.200728	-0.668198	0.92275	1	15	14	14.5	UNK
Locus_10080_Transcript_4/5_Confidence_0.667_Length_3118	3118	Locus_10080_Transcript_4/5_Confidence_0.667_Length_3118	3118	Locus_10080_Transcript_4/5_Confidence_0.667_Length_3118	3118	Q6EE22	86.079	0	UNK_CANLF	RING finger protein unkempt homolog	cfa:444855	GO:0005737 \\ GO:0003723 \\ GO:0008270 \\ GO:0048667 \\ GO:0006417 \\	cell morphogenesis involved in neuron differentiation (GO:0048667);regulation of translation (GO:0006417);	RNA binding (GO:0003723);zinc ion binding (GO:0008270);	cytoplasm (GO:0005737);	Coiled coil;Complete proteome;Cytoplasm;Metal-binding;Phosphoprotein;Reference proteome;Repeat;Repressor;RNA-binding;Translation regulation;Zinc;Zinc-finger.;		0.558613	-0.317092	0.577471	1	22	16	19	UNK
Locus_10080_Transcript_5/5_Confidence_0.667_Length_3202	3202	Locus_10080_Transcript_5/5_Confidence_0.667_Length_3202	3202	Locus_10080_Transcript_5/5_Confidence_0.667_Length_3202	3202	Q6EE22	89.4	0	UNK_CANLF	RING finger protein unkempt homolog	cfa:444855	GO:0005737 \\ GO:0003723 \\ GO:0008270 \\ GO:0048667 \\ GO:0006417 \\	cell morphogenesis involved in neuron differentiation (GO:0048667);regulation of translation (GO:0006417);	RNA binding (GO:0003723);zinc ion binding (GO:0008270);	cytoplasm (GO:0005737);	Coiled coil;Complete proteome;Cytoplasm;Metal-binding;Phosphoprotein;Reference proteome;Repeat;Repressor;RNA-binding;Translation regulation;Zinc;Zinc-finger.;		0.102074	-0.62582	0.92275	1	15	15	15	UNK
Locus_10083_Transcript_1/5_Confidence_0.538_Length_1435	1435	No_sig_nr_hit	No_sig_nr_hit	No_sig_nr_hit	No_sig_nr_hit	No_Uniprotmatch	No_%_identity	No_evalue	No_ID	No_Description	No_KEGG	No_GO	No_GOCC	No_GOBP	No_GOMF	No_keywords		0.43257	0.500164	0.680479	1	39	31	35	No
Locus_10083_Transcript_2/5_Confidence_0.538_Length_981	981	No_sig_nr_hit	No_sig_nr_hit	No_sig_nr_hit	No_sig_nr_hit	No_Uniprotmatch	No_%_identity	No_evalue	No_ID	No_Description	No_KEGG	No_GO	No_GOCC	No_GOBP	No_GOMF	No_keywords		-0.204106	-0.0434818	0.895734	1	21	26	23.5	No
Locus_10083_Transcript_4/5_Confidence_0.462_Length_1340	1340	No_sig_nr_hit	No_sig_nr_hit	No_sig_nr_hit	No_sig_nr_hit	No_Uniprotmatch	No_%_identity	No_evalue	No_ID	No_Description	No_KEGG	No_GO	No_GOCC	No_GOBP	No_GOMF	No_keywords		0.398618	0.648073	0.682554	1	43	35	39	No
Locus_10085_Transcript_1/2_Confidence_0.800_Length_2537	2537	Locus_10085_Transcript_1/2_Confidence_0.800_Length_2537	2537	Locus_10085_Transcript_1/2_Confidence_0.800_Length_2537	2537	Q8BQ89	88.104	5.03e-166	LIX1L_MOUSE	LIX1-like protein	mmu:280411	GO:0005737 \\ GO:0097352 \\	autophagosome maturation (GO:0097352);	No_GOMF	cytoplasm (GO:0005737);	Complete proteome;Reference proteome.;		0.0945019	3.72219	0.916489	1	343	345	344	LIX1L
Locus_10085_Transcript_2/2_Confidence_0.800_Length_2483	2483	Locus_10085_Transcript_2/2_Confidence_0.800_Length_2483	2483	Locus_10085_Transcript_2/2_Confidence_0.800_Length_2483	2483	Q8BQ89	94.422	1.85e-171	LIX1L_MOUSE	LIX1-like protein	mmu:280411	GO:0005737 \\ GO:0097352 \\	autophagosome maturation (GO:0097352);	No_GOMF	cytoplasm (GO:0005737);	Complete proteome;Reference proteome.;		0.0645308	3.8493	0.945334	1	371	381	376	LIX1L
Locus_10087_Transcript_2/6_Confidence_0.688_Length_3608	3608	No_sig_nr_hit	No_sig_nr_hit	No_sig_nr_hit	No_sig_nr_hit	No_Uniprotmatch	No_%_identity	No_evalue	No_ID	No_Description	No_KEGG	No_GO	No_GOCC	No_GOBP	No_GOMF	No_keywords		-0.00813623	6.16733	0.992953	1	1812	1957	1884.5	No
Locus_100876_Transcript_1/1_Confidence_1.000_Length_1463	1463	No_sig_nr_hit	No_sig_nr_hit	No_sig_nr_hit	No_sig_nr_hit	No_Uniprotmatch	No_%_identity	No_evalue	No_ID	No_Description	No_KEGG	No_GO	No_GOCC	No_GOBP	No_GOMF	No_keywords		0.216237	-0.854635	1	1	13	12	12.5	No
Locus_10089_Transcript_1/3_Confidence_0.714_Length_4903	4903	Locus_10089_Transcript_1/3_Confidence_0.714_Length_4903	4903	Locus_10089_Transcript_1/3_Confidence_0.714_Length_4903	4903	Q9Y2C2	93.333	0	UST_HUMAN	Uronyl 2-sulfotransferase	hsa:10090	GO:0000139 \\ GO:0016021 \\ GO:0008146 \\ GO:0005975 \\ GO:0030204 \\ GO:0030208 \\ GO:0030203 \\ GO:0006477 \\ GO:0044281 \\	carbohydrate metabolic process (GO:0005975);chondroitin sulfate metabolic process (GO:0030204);dermatan sulfate biosynthetic process (GO:0030208);glycosaminoglycan metabolic process (GO:0030203);protein sulfation (GO:0006477);small molecule metabolic process (GO:0044281);	sulfotransferase activity (GO:0008146);	Golgi membrane (GO:0000139);integral component of membrane (GO:0016021);	Complete proteome;Glycoprotein;Golgi apparatus;Membrane;Polymorphism;Reference proteome;Signal-anchor;Transferase;Transmembrane;Transmembrane helix.;		0.052814	4.46181	0.949894	1	566	586	576	UST
Locus_100893_Transcript_1/1_Confidence_1.000_Length_397	397	Locus_100893_Transcript_1/1_Confidence_1.000_Length_397	397	Locus_100893_Transcript_1/1_Confidence_1.000_Length_397	397	Q6UUV9	79.412	1.28e-10	CRTC1_HUMAN	CREB-regulated transcription coactivator 1	hsa:23373	GO:0005737 \\ GO:0030425 \\ GO:0043025 \\ GO:0005654 \\ GO:0005634 \\ GO:0005886 \\ GO:0045202 \\ GO:0008140 \\ GO:0043153 \\ GO:0060081 \\ GO:0007613 \\ GO:0032793 \\ GO:1900006 \\ GO:1900273 \\ GO:0045944 \\ GO:0051289 \\ GO:0048511 \\ GO:0006351 \\ GO:0016032 \\	entrainment of circadian clock by photoperiod (GO:0043153);membrane hyperpolarization (GO:0060081);memory (GO:0007613);positive regulation of CREB transcription factor activity (GO:0032793);positive regulation of dendrite development (GO:1900006);positive regulation of long-term synaptic potentiation (GO:1900273);positive regulation of transcription from RNA polymerase II promoter (GO:0045944);pr…	cAMP response element binding protein binding (GO:0008140);	cytoplasm (GO:0005737);dendrite (GO:0030425);neuronal cell body (GO:0043025);nucleoplasm (GO:0005654);nucleus (GO:0005634);plasma membrane (GO:0005886);synapse (GO:0045202);	Activator;Alternative splicing;Biological rhythms;Chromosomal rearrangement;Complete proteome;Cytoplasm;Host-virus interaction;Nucleus;Phosphoprotein;Polymorphism;Reference proteome;Transcription;Transcription regulation.;		0.101944	-0.806454	1	1	13	13	13	CRTC1
Locus_100899_Transcript_1/1_Confidence_1.000_Length_288	288	Locus_100899_Transcript_1/1_Confidence_1.000_Length_288	288	Locus_100899_Transcript_1/1_Confidence_1.000_Length_288	288	G2YXE3	37.079	1.71e-08	G2YXE3_BOTF4	Uncharacterized protein {ECO:0000313|EMBL:CCD56114.1}	No_KEGG	GO:0016032 \\	viral process (GO:0016032);	No_GOMF	No_GOCC	Coiled coil {ECO:0000256|SAM:Coils};Complete proteome {ECO:0000313|Proteomes:UP000008177};Reference proteome {ECO:0000313|Proteomes:UP000008177}.;		-0.242555	-0.857618	0.820975	1	11	14	12.5	G2YXE3
Locus_1009_Transcript_2/7_Confidence_0.562_Length_2240	2240	Locus_1009_Transcript_2/7_Confidence_0.562_Length_2240	2240	Locus_1009_Transcript_2/7_Confidence_0.562_Length_2240	2240	P09102	94.664	0	PDIA1_CHICK	Protein disulfide-isomerase	No_KEGG	GO:0005783 \\ GO:0005788 \\ GO:0005886 \\ GO:0003756 \\ GO:0045454 \\ GO:0019511 \\ GO:0006457 \\ GO:1902175 \\ GO:0034976 \\	cell redox homeostasis (GO:0045454);peptidyl-proline hydroxylation (GO:0019511);protein folding (GO:0006457);regulation of oxidative stress-induced intrinsic apoptotic signaling pathway (GO:1902175);response to endoplasmic reticulum stress (GO:0034976);	protein disulfide isomerase activity (GO:0003756);	endoplasmic reticulum (GO:0005783);endoplasmic reticulum lumen (GO:0005788);plasma membrane (GO:0005886);	Cell membrane;Chaperone;Complete proteome;Direct protein sequencing;Disulfide bond;Endoplasmic reticulum;Isomerase;Membrane;Redox-active center;Reference proteome;Repeat;Signal.;		-0.0406575	4.37539	0.964535	1	516	570	543	PDIA1
Locus_1009_Transcript_3/7_Confidence_0.562_Length_2455	2455	Locus_1009_Transcript_3/7_Confidence_0.562_Length_2455	2455	Locus_1009_Transcript_3/7_Confidence_0.562_Length_2455	2455	P09102	96.875	2.45e-124	PDIA1_CHICK	Protein disulfide-isomerase	No_KEGG	GO:0005783 \\ GO:0005788 \\ GO:0005886 \\ GO:0003756 \\ GO:0045454 \\ GO:0019511 \\ GO:0006457 \\ GO:1902175 \\ GO:0034976 \\	cell redox homeostasis (GO:0045454);peptidyl-proline hydroxylation (GO:0019511);protein folding (GO:0006457);regulation of oxidative stress-induced intrinsic apoptotic signaling pathway (GO:1902175);response to endoplasmic reticulum stress (GO:0034976);	protein disulfide isomerase activity (GO:0003756);	endoplasmic reticulum (GO:0005783);endoplasmic reticulum lumen (GO:0005788);plasma membrane (GO:0005886);	Cell membrane;Chaperone;Complete proteome;Direct protein sequencing;Disulfide bond;Endoplasmic reticulum;Isomerase;Membrane;Redox-active center;Reference proteome;Repeat;Signal.;		-0.0157908	4.35448	0.989714	1	513	557	535	PDIA1
Locus_1009_Transcript_4/7_Confidence_0.375_Length_1036	1036	No_sig_nr_hit	No_sig_nr_hit	No_sig_nr_hit	No_sig_nr_hit	No_Uniprotmatch	No_%_identity	No_evalue	No_ID	No_Description	No_KEGG	No_GO	No_GOCC	No_GOBP	No_GOMF	No_keywords		0.0975455	3.3777	0.909216	1	270	271	270.5	No
Locus_1009_Transcript_5/7_Confidence_0.250_Length_1231	1231	No_sig_nr_hit	No_sig_nr_hit	No_sig_nr_hit	No_sig_nr_hit	No_Uniprotmatch	No_%_identity	No_evalue	No_ID	No_Description	No_KEGG	No_GO	No_GOCC	No_GOBP	No_GOMF	No_keywords		0.0249086	3.20822	0.98294	1	234	247	240.5	No
Locus_1009_Transcript_6/7_Confidence_0.250_Length_1756	1756	Locus_1009_Transcript_6/7_Confidence_0.250_Length_1756	1756	Locus_1009_Transcript_6/7_Confidence_0.250_Length_1756	1756	P09102	92.739	2.46e-165	PDIA1_CHICK	Protein disulfide-isomerase	No_KEGG	GO:0005783 \\ GO:0005788 \\ GO:0005886 \\ GO:0003756 \\ GO:0045454 \\ GO:0019511 \\ GO:0006457 \\ GO:1902175 \\ GO:0034976 \\	cell redox homeostasis (GO:0045454);peptidyl-proline hydroxylation (GO:0019511);protein folding (GO:0006457);regulation of oxidative stress-induced intrinsic apoptotic signaling pathway (GO:1902175);response to endoplasmic reticulum stress (GO:0034976);	protein disulfide isomerase activity (GO:0003756);	endoplasmic reticulum (GO:0005783);endoplasmic reticulum lumen (GO:0005788);plasma membrane (GO:0005886);	Cell membrane;Chaperone;Complete proteome;Direct protein sequencing;Disulfide bond;Endoplasmic reticulum;Isomerase;Membrane;Redox-active center;Reference proteome;Repeat;Signal.;		0.0519619	2.71306	0.960079	1	167	173	170	PDIA1
Locus_1009_Transcript_7/7_Confidence_0.562_Length_2216	2216	Locus_1009_Transcript_7/7_Confidence_0.562_Length_2216	2216	Locus_1009_Transcript_7/7_Confidence_0.562_Length_2216	2216	P09102	94.575	0	PDIA1_CHICK	Protein disulfide-isomerase	No_KEGG	GO:0005783 \\ GO:0005788 \\ GO:0005886 \\ GO:0003756 \\ GO:0045454 \\ GO:0019511 \\ GO:0006457 \\ GO:1902175 \\ GO:0034976 \\	cell redox homeostasis (GO:0045454);peptidyl-proline hydroxylation (GO:0019511);protein folding (GO:0006457);regulation of oxidative stress-induced intrinsic apoptotic signaling pathway (GO:1902175);response to endoplasmic reticulum stress (GO:0034976);	protein disulfide isomerase activity (GO:0003756);	endoplasmic reticulum (GO:0005783);endoplasmic reticulum lumen (GO:0005788);plasma membrane (GO:0005886);	Cell membrane;Chaperone;Complete proteome;Direct protein sequencing;Disulfide bond;Endoplasmic reticulum;Isomerase;Membrane;Redox-active center;Reference proteome;Repeat;Signal.;		-0.112703	4.42615	0.895065	1	521	605	563	PDIA1
Locus_10091_Transcript_1/1_Confidence_1.000_Length_2386	2386	Locus_10091_Transcript_1/1_Confidence_1.000_Length_2386	2386	Locus_10091_Transcript_1/1_Confidence_1.000_Length_2386	2386	A0A093BM48	67.647	9.86e-11	A0A093BM48_CHAPE	Zinc finger CCCH domain-containing protein 11A {ECO:0000313|EMBL:KFU85683.1}	No_KEGG	GO:0046872 \\	No_GOBP	metal ion binding (GO:0046872);	No_GOCC	Coiled coil {ECO:0000256|SAM:Coils};Complete proteome {ECO:0000313|Proteomes:UP000031515};Metal-binding {ECO:0000256|SAAS:SAAS00522393};Reference proteome {ECO:0000313|Proteomes:UP000031515}.;		-0.37046	1.74019	0.681832	1	72	100	86	A0A093BM48
Locus_100911_Transcript_1/1_Confidence_1.000_Length_531	531	Locus_100911_Transcript_1/1_Confidence_1.000_Length_531	531	Locus_100911_Transcript_1/1_Confidence_1.000_Length_531	531	A0A078A2G4	76.596	3.47e-25	A0A078A2G4_STYLE	Uncharacterized protein {ECO:0000313|EMBL:CDW75723.1}	No_KEGG	No_GOcodes	No_GOBP	No_GOMF	No_GOCC	Complete proteome {ECO:0000313|Proteomes:UP000039865};Reference proteome {ECO:0000313|Proteomes:UP000039865}.;		0.25602	4.3402	0.76156	1	556	500	528	A0A078A2G4
Locus_10092_Transcript_1/3_Confidence_0.667_Length_2358	2358	Locus_10092_Transcript_1/3_Confidence_0.667_Length_2358	2358	Locus_10092_Transcript_1/3_Confidence_0.667_Length_2358	2358	Q99689	59.806	2.39e-111	FEZ1_HUMAN	Fasciculation and elongation protein zeta-1	hsa:9638	GO:0030424 \\ GO:0005813 \\ GO:0005737 \\ GO:0030425 \\ GO:0005794 \\ GO:0005874 \\ GO:0015630 \\ GO:0005739 \\ GO:0005886 \\ GO:0007411 \\ GO:0007155 \\ GO:0071363 \\ GO:0051654 \\ GO:1902902 \\ GO:0007399 \\ GO:0010976 \\ GO:0006810 \\	axon guidance (GO:0007411);cell adhesion (GO:0007155);cellular response to growth factor stimulus (GO:0071363);establishment of mitochondrion localization (GO:0051654);negative regulation of autophagosome assembly (GO:1902902);nervous system development (GO:0007399);positive regulation of neuron projection development (GO:0010976);transport (GO:0006810);	No_GOMF	axon (GO:0030424);centrosome (GO:0005813);cytoplasm (GO:0005737);dendrite (GO:0030425);Golgi apparatus (GO:0005794);microtubule (GO:0005874);microtubule cytoskeleton (GO:0015630);mitochondrion (GO:0005739);plasma membrane (GO:0005886);	Alternative splicing;Cell membrane;Coiled coil;Complete proteome;Cytoplasm;Cytoskeleton;Disulfide bond;Membrane;Microtubule;Phosphoprotein;Polymorphism;Reference proteome;Transport;Ubl conjugation.;		0.0306784	0.678645	1	1	39	41	40	FEZ1
Locus_10092_Transcript_2/3_Confidence_0.667_Length_2237	2237	Locus_10092_Transcript_2/3_Confidence_0.667_Length_2237	2237	Locus_10092_Transcript_2/3_Confidence_0.667_Length_2237	2237	P97577	47.703	1.1e-42	FEZ1_RAT	Fasciculation and elongation protein zeta-1	rno:81730	GO:0030424 \\ GO:0042995 \\ GO:0005813 \\ GO:0005737 \\ GO:0030425 \\ GO:0005794 \\ GO:0005874 \\ GO:0005886 \\ GO:0005080 \\ GO:0047485 \\ GO:0007411 \\ GO:0071363 \\ GO:0051654 \\ GO:1902902 \\ GO:0045666 \\ GO:0010976 \\ GO:0006810 \\	axon guidance (GO:0007411);cellular response to growth factor stimulus (GO:0071363);establishment of mitochondrion localization (GO:0051654);negative regulation of autophagosome assembly (GO:1902902);positive regulation of neuron differentiation (GO:0045666);positive regulation of neuron projection development (GO:0010976);transport (GO:0006810);	protein kinase C binding (GO:0005080);protein N-terminus binding (GO:0047485);	axon (GO:0030424);cell projection (GO:0042995);centrosome (GO:0005813);cytoplasm (GO:0005737);dendrite (GO:0030425);Golgi apparatus (GO:0005794);microtubule (GO:0005874);plasma membrane (GO:0005886);	Cell membrane;Coiled coil;Complete proteome;Cytoplasm;Cytoskeleton;Membrane;Microtubule;Phosphoprotein;Reference proteome;Transport;Ubl conjugation.;		-0.569487	-0.810865	0.649733	1	10	16	13	FEZ1
Locus_100920_Transcript_1/1_Confidence_1.000_Length_262	262	No_sig_nr_hit	No_sig_nr_hit	No_sig_nr_hit	No_sig_nr_hit	No_Uniprotmatch	No_%_identity	No_evalue	No_ID	No_Description	No_KEGG	No_GO	No_GOCC	No_GOBP	No_GOMF	No_keywords		-0.294168	0.0645249	0.807387	1	22	29	25.5	No
Locus_10094_Transcript_2/3_Confidence_0.571_Length_1959	1959	Locus_10094_Transcript_2/3_Confidence_0.571_Length_1959	1959	Locus_10094_Transcript_2/3_Confidence_0.571_Length_1959	1959	Q9NQG1	66.216	6.53e-28	MANBL_HUMAN	Protein MANBAL	hsa:63905	GO:0016021 \\	No_GOBP	No_GOMF	integral component of membrane (GO:0016021);	Complete proteome;Membrane;Reference proteome;Transmembrane;Transmembrane helix.;		0.116461	2.03589	0.898379	1	106	105	105.5	MANBL
Locus_10094_Transcript_3/3_Confidence_0.714_Length_2080	2080	Locus_10094_Transcript_3/3_Confidence_0.714_Length_2080	2080	Locus_10094_Transcript_3/3_Confidence_0.714_Length_2080	2080	Q9NQG1	66.216	8.03e-28	MANBL_HUMAN	Protein MANBAL	hsa:63905	GO:0016021 \\	No_GOBP	No_GOMF	integral component of membrane (GO:0016021);	Complete proteome;Membrane;Reference proteome;Transmembrane;Transmembrane helix.;		-0.226168	2.34862	0.796523	1	117	147	132	MANBL
Locus_10096_Transcript_5/5_Confidence_0.600_Length_3438	3438	Locus_10096_Transcript_5/5_Confidence_0.600_Length_3438	3438	Locus_10096_Transcript_5/5_Confidence_0.600_Length_3438	3438	P09917	81.818	0	LOX5_HUMAN	Arachidonate 5-lipoxygenase	hsa:240	GO:0005829 \\ GO:0030425 \\ GO:0005615 \\ GO:0005635 \\ GO:0005641 \\ GO:0016363 \\ GO:0031965 \\ GO:0042383 \\ GO:0004051 \\ GO:0005506 \\ GO:0002526 \\ GO:0019369 \\ GO:0019370 \\ GO:0006691 \\ GO:0002540 \\ GO:2001300 \\ GO:0019372 \\ GO:0045907 \\ GO:0055093 \\ GO:0007584 \\ GO:0019233 \\ GO:0044281 \\	acute inflammatory response (GO:0002526);arachidonic acid metabolic process (GO:0019369);leukotriene biosynthetic process (GO:0019370);leukotriene metabolic process (GO:0006691);leukotriene production involved in inflammatory response (GO:0002540);lipoxin metabolic process (GO:2001300);lipoxygenase pathway (GO:0019372);positive regulation of vasoconstriction (GO:0045907);response to hyperoxia (GO…	arachidonate 5-lipoxygenase activity (GO:0004051);iron ion binding (GO:0005506);	cytosol (GO:0005829);dendrite (GO:0030425);extracellular space (GO:0005615);nuclear envelope (GO:0005635);nuclear envelope lumen (GO:0005641);nuclear matrix (GO:0016363);nuclear membrane (GO:0031965);sarcolemma (GO:0042383);	3D-structure;Alternative splicing;Calcium;Complete proteome;Cytoplasm;Dioxygenase;Direct protein sequencing;Iron;Leukotriene biosynthesis;Membrane;Metal-binding;Nucleus;Oxidoreductase;Phosphoprotein;Polymorphism;Reference proteome.;		-0.263172	2.49623	0.770998	1	128	165	146.5	LOX5
Locus_100962_Transcript_1/1_Confidence_1.000_Length_273	273	No_sig_nr_hit	No_sig_nr_hit	No_sig_nr_hit	No_sig_nr_hit	No_Uniprotmatch	No_%_identity	No_evalue	No_ID	No_Description	No_KEGG	No_GO	No_GOCC	No_GOBP	No_GOMF	No_keywords		0.102014	-0.713313	1	1	14	14	14	No
Locus_100967_Transcript_1/1_Confidence_1.000_Length_220	220	No_sig_nr_hit	No_sig_nr_hit	No_sig_nr_hit	No_sig_nr_hit	No_Uniprotmatch	No_%_identity	No_evalue	No_ID	No_Description	No_KEGG	No_GO	No_GOCC	No_GOBP	No_GOMF	No_keywords		-0.10978	0.913992	0.94532	1	44	51	47.5	No
Locus_10098_Transcript_1/1_Confidence_1.000_Length_688	688	No_sig_nr_hit	No_sig_nr_hit	No_sig_nr_hit	No_sig_nr_hit	No_Uniprotmatch	No_%_identity	No_evalue	No_ID	No_Description	No_KEGG	No_GO	No_GOCC	No_GOBP	No_GOMF	No_keywords		-0.408589	-0.469258	0.793603	1	14	20	17	No
Locus_10099_Transcript_1/6_Confidence_0.688_Length_9034	9034	Locus_10099_Transcript_1/6_Confidence_0.688_Length_9034	9034	Locus_10099_Transcript_1/6_Confidence_0.688_Length_9034	9034	Q9JIL5	78.116	0	TULP4_MOUSE	Tubby-related protein 4	No_KEGG	GO:0005929 \\ GO:0005737 \\ GO:0035091 \\ GO:0035556 \\ GO:0061512 \\ GO:0016567 \\	intracellular signal transduction (GO:0035556);protein localization to cilium (GO:0061512);protein ubiquitination (GO:0016567);	phosphatidylinositol binding (GO:0035091);	cilium (GO:0005929);cytoplasm (GO:0005737);	Complete proteome;Cytoplasm;Reference proteome;Repeat;Ubl conjugation pathway;WD repeat.;		0.116436	4.02942	0.890881	1	428	424	426	TULP4
Locus_10099_Transcript_3/6_Confidence_0.688_Length_9413	9413	Locus_10099_Transcript_3/6_Confidence_0.688_Length_9413	9413	Locus_10099_Transcript_3/6_Confidence_0.688_Length_9413	9413	Q9JIL5	78.116	0	TULP4_MOUSE	Tubby-related protein 4	No_KEGG	GO:0005929 \\ GO:0005737 \\ GO:0035091 \\ GO:0035556 \\ GO:0061512 \\ GO:0016567 \\	intracellular signal transduction (GO:0035556);protein localization to cilium (GO:0061512);protein ubiquitination (GO:0016567);	phosphatidylinositol binding (GO:0035091);	cilium (GO:0005929);cytoplasm (GO:0005737);	Complete proteome;Cytoplasm;Reference proteome;Repeat;Ubl conjugation pathway;WD repeat.;		-0.0736896	4.20507	0.931603	1	453	512	482.5	TULP4
Locus_101_Transcript_10/10_Confidence_0.208_Length_2429	2429	Locus_101_Transcript_10/10_Confidence_0.208_Length_2429	2429	Locus_101_Transcript_10/10_Confidence_0.208_Length_2429	2429	Q96GR4	57.692	1.35e-47	ZDH12_HUMAN	Probable palmitoyltransferase ZDHHC12	hsa:84885	GO:0005783 \\ GO:0005794 \\ GO:0016021 \\ GO:0016409 \\ GO:0019706 \\ GO:0008270 \\ GO:0018345 \\	protein palmitoylation (GO:0018345);	palmitoyltransferase activity (GO:0016409);protein-cysteine S-palmitoyltransferase activity (GO:0019706);zinc ion binding (GO:0008270);	endoplasmic reticulum (GO:0005783);Golgi apparatus (GO:0005794);integral component of membrane (GO:0016021);	Acyltransferase;Alternative splicing;Complete proteome;Membrane;Metal-binding;Polymorphism;Reference proteome;Transferase;Transmembrane;Transmembrane helix;Zinc;Zinc-finger.;		0.270688	1.88235	0.763478	1	100	89	94.5	ZDH12
Locus_101_Transcript_7/10_Confidence_0.375_Length_5186	5186	Locus_101_Transcript_7/10_Confidence_0.375_Length_5186	5186	Locus_101_Transcript_7/10_Confidence_0.375_Length_5186	5186	Q7Z7L7	89.687	0	ZER1_HUMAN	Protein zer-1 homolog	hsa:10444	GO:0031462 \\ GO:0004842 \\ GO:0016567 \\ GO:0051438 \\	protein ubiquitination (GO:0016567);regulation of ubiquitin-protein transferase activity (GO:0051438);	ubiquitin-protein transferase activity (GO:0004842);	Cul2-RING ubiquitin ligase complex (GO:0031462);	Acetylation;Complete proteome;Leucine-rich repeat;Polymorphism;Reference proteome;Repeat;Ubl conjugation pathway.;		0.152891	3.31915	0.858772	1	264	255	259.5	ZER1
Locus_101_Transcript_8/10_Confidence_0.292_Length_7796	7796	Locus_101_Transcript_8/10_Confidence_0.292_Length_7796	7796	Locus_101_Transcript_8/10_Confidence_0.292_Length_7796	7796	Q7Z7L7	89.687	0	ZER1_HUMAN	Protein zer-1 homolog	hsa:10444	GO:0031462 \\ GO:0004842 \\ GO:0016567 \\ GO:0051438 \\	protein ubiquitination (GO:0016567);regulation of ubiquitin-protein transferase activity (GO:0051438);	ubiquitin-protein transferase activity (GO:0004842);	Cul2-RING ubiquitin ligase complex (GO:0031462);	Acetylation;Complete proteome;Leucine-rich repeat;Polymorphism;Reference proteome;Repeat;Ubl conjugation pathway.;		-0.0109427	5.36193	0.990832	1	1035	1120	1077.5	ZER1
Locus_101_Transcript_9/10_Confidence_0.292_Length_7773	7773	Locus_101_Transcript_9/10_Confidence_0.292_Length_7773	7773	Locus_101_Transcript_9/10_Confidence_0.292_Length_7773	7773	Q7Z7L7	89.687	0	ZER1_HUMAN	Protein zer-1 homolog	hsa:10444	GO:0031462 \\ GO:0004842 \\ GO:0016567 \\ GO:0051438 \\	protein ubiquitination (GO:0016567);regulation of ubiquitin-protein transferase activity (GO:0051438);	ubiquitin-protein transferase activity (GO:0004842);	Cul2-RING ubiquitin ligase complex (GO:0031462);	Acetylation;Complete proteome;Leucine-rich repeat;Polymorphism;Reference proteome;Repeat;Ubl conjugation pathway.;		-0.0475153	5.35795	0.955912	1	1019	1131	1075	ZER1
Locus_1010_Transcript_1/3_Confidence_0.714_Length_5298	5298	Locus_1010_Transcript_1/3_Confidence_0.714_Length_5298	5298	Locus_1010_Transcript_1/3_Confidence_0.714_Length_5298	5298	D2H526	78.741	0	CDK12_AILME	Cyclin-dependent kinase 12	No_KEGG	GO:0002944 \\ GO:0019908 \\ GO:0016607 \\ GO:0005730 \\ GO:0005524 \\ GO:0004693 \\ GO:0008353 \\ GO:0006397 \\ GO:0070816 \\ GO:0046777 \\ GO:0043405 \\ GO:0008380 \\	mRNA processing (GO:0006397);phosphorylation of RNA polymerase II C-terminal domain (GO:0070816);protein autophosphorylation (GO:0046777);regulation of MAP kinase activity (GO:0043405);RNA splicing (GO:0008380);	ATP binding (GO:0005524);cyclin-dependent protein serine/threonine kinase activity (GO:0004693);RNA polymerase II carboxy-terminal domain kinase activity (GO:0008353);	cyclin K-CDK12 complex (GO:0002944);nuclear cyclin-dependent protein kinase holoenzyme complex (GO:0019908);nuclear speck (GO:0016607);nucleolus (GO:0005730);	ATP-binding;Complete proteome;Kinase;mRNA processing;mRNA splicing;Nucleotide-binding;Nucleus;Phosphoprotein;Reference proteome;Serine/threonine-protein kinase;Transferase.;		-0.0624766	3.70489	0.947649	1	321	360	340.5	CDK12
Locus_1010_Transcript_2/3_Confidence_0.714_Length_5325	5325	Locus_1010_Transcript_2/3_Confidence_0.714_Length_5325	5325	Locus_1010_Transcript_2/3_Confidence_0.714_Length_5325	5325	D2H526	78.954	0	CDK12_AILME	Cyclin-dependent kinase 12	No_KEGG	GO:0002944 \\ GO:0019908 \\ GO:0016607 \\ GO:0005730 \\ GO:0005524 \\ GO:0004693 \\ GO:0008353 \\ GO:0006397 \\ GO:0070816 \\ GO:0046777 \\ GO:0043405 \\ GO:0008380 \\	mRNA processing (GO:0006397);phosphorylation of RNA polymerase II C-terminal domain (GO:0070816);protein autophosphorylation (GO:0046777);regulation of MAP kinase activity (GO:0043405);RNA splicing (GO:0008380);	ATP binding (GO:0005524);cyclin-dependent protein serine/threonine kinase activity (GO:0004693);RNA polymerase II carboxy-terminal domain kinase activity (GO:0008353);	cyclin K-CDK12 complex (GO:0002944);nuclear cyclin-dependent protein kinase holoenzyme complex (GO:0019908);nuclear speck (GO:0016607);nucleolus (GO:0005730);	ATP-binding;Complete proteome;Kinase;mRNA processing;mRNA splicing;Nucleotide-binding;Nucleus;Phosphoprotein;Reference proteome;Serine/threonine-protein kinase;Transferase.;		0.0484587	3.7235	0.960241	1	338	351	344.5	CDK12
Locus_10100_Transcript_2/3_Confidence_0.714_Length_8395	8395	Locus_10100_Transcript_2/3_Confidence_0.714_Length_8395	8395	Locus_10100_Transcript_2/3_Confidence_0.714_Length_8395	8395	Q86X10	91.639	0	RLGPB_HUMAN	Ral GTPase-activating protein subunit beta	hsa:57148	GO:0005622 \\ GO:0005096 \\ GO:0046982 \\ GO:0090630 \\ GO:0061024 \\ GO:0032484 \\ GO:0060178 \\ GO:0051056 \\	activation of GTPase activity (GO:0090630);membrane organization (GO:0061024);Ral protein signal transduction (GO:0032484);regulation of exocyst localization (GO:0060178);regulation of small GTPase mediated signal transduction (GO:0051056);	GTPase activator activity (GO:0005096);protein heterodimerization activity (GO:0046982);	intracellular (GO:0005622);	Alternative splicing;Complete proteome;GTPase activation;Phosphoprotein;Reference proteome.;		0.0234862	5.05787	0.979464	1	848	896	872	RLGPB
Locus_10101_Transcript_1/1_Confidence_1.000_Length_3142	3142	Locus_10101_Transcript_1/1_Confidence_1.000_Length_3142	3142	Locus_10101_Transcript_1/1_Confidence_1.000_Length_3142	3142	Q7YR76	62.908	0	MYCD_PIG	Myocardin	ssc:396571	GO:0005634 \\ GO:0001105 \\ GO:0055007 \\ GO:2000727 \\ GO:0045944 \\ GO:0035065 \\ GO:0006357 \\ GO:0051145 \\	cardiac muscle cell differentiation (GO:0055007);positive regulation of cardiac muscle cell differentiation (GO:2000727);positive regulation of transcription from RNA polymerase II promoter (GO:0045944);regulation of histone acetylation (GO:0035065);regulation of transcription from RNA polymerase II promoter (GO:0006357);smooth muscle cell differentiation (GO:0051145);	RNA polymerase II transcription coactivator activity (GO:0001105);	nucleus (GO:0005634);	Activator;Coiled coil;Complete proteome;Nucleus;Phosphoprotein;Reference proteome;Repeat;Transcription;Transcription regulation.;		-0.0170221	4.73689	0.984214	1	669	727	698	MYCD
Locus_10102_Transcript_1/1_Confidence_1.000_Length_2327	2327	No_sig_nr_hit	No_sig_nr_hit	No_sig_nr_hit	No_sig_nr_hit	No_Uniprotmatch	No_%_identity	No_evalue	No_ID	No_Description	No_KEGG	No_GO	No_GOCC	No_GOBP	No_GOMF	No_keywords		0.0263838	5.11139	0.975631	1	881	929	905	No
Locus_101020_Transcript_1/1_Confidence_1.000_Length_226	226	No_sig_nr_hit	No_sig_nr_hit	No_sig_nr_hit	No_sig_nr_hit	No_Uniprotmatch	No_%_identity	No_evalue	No_ID	No_Description	No_KEGG	No_GO	No_GOCC	No_GOBP	No_GOMF	No_keywords		0.261568	-0.389986	0.803399	1	19	17	18	No
Locus_10106_Transcript_1/1_Confidence_1.000_Length_4457	4457	Locus_10106_Transcript_1/1_Confidence_1.000_Length_4457	4457	Locus_10106_Transcript_1/1_Confidence_1.000_Length_4457	4457	Q9TU53	61.452	0	CUBN_CANLF	Cubilin	cfa:403767	GO:0016324 \\ GO:0010008 \\ GO:0005765 \\ GO:0005509 \\ GO:0031419 \\ GO:0004872 \\ GO:0008203 \\ GO:0015031 \\ GO:0006898 \\	cholesterol metabolic process (GO:0008203);protein transport (GO:0015031);receptor-mediated endocytosis (GO:0006898);	calcium ion binding (GO:0005509);cobalamin binding (GO:0031419);receptor activity (GO:0004872);	apical plasma membrane (GO:0016324);endosome membrane (GO:0010008);lysosomal membrane (GO:0005765);	Calcium;Cholesterol metabolism;Cleavage on pair of basic residues;Cobalamin;Cobalt;Complete proteome;Direct protein sequencing;Disulfide bond;EGF-like domain;Endosome;Glycoprotein;Lipid metabolism;Lysosome;Membrane;Metal-binding;Phosphoprotein;Protein transport;Reference proteome;Repeat;Signal;Steroid metabolism;Sterol metabolism;Transport.;		-0.332124	0.674491	0.743843	1	34	46	40	CUBN
Locus_10107_Transcript_1/5_Confidence_0.500_Length_7325	7325	Locus_10107_Transcript_1/5_Confidence_0.500_Length_7325	7325	Locus_10107_Transcript_1/5_Confidence_0.500_Length_7325	7325	Q9EQG6	82.562	0	KDIS_RAT	Kinase D-interacting substrate of 220 kDa	rno:116478	GO:0005829 \\ GO:0016021 \\ GO:0005770 \\ GO:0043234 \\ GO:0030165 \\ GO:0019901 \\ GO:0019887 \\ GO:1990090 \\ GO:0016482 \\ GO:0038180 \\ GO:0010976 \\ GO:0045859 \\	cellular response to nerve growth factor stimulus (GO:1990090);cytoplasmic transport (GO:0016482);nerve growth factor signaling pathway (GO:0038180);positive regulation of neuron projection development (GO:0010976);regulation of protein kinase activity (GO:0045859);	PDZ domain binding (GO:0030165);protein kinase binding (GO:0019901);protein kinase regulator activity (GO:0019887);	cytosol (GO:0005829);integral component of membrane (GO:0016021);late endosome (GO:0005770);protein complex (GO:0043234);	Alternative splicing;ANK repeat;Complete proteome;Endosome;Membrane;Neurogenesis;Phosphoprotein;Reference proteome;Repeat;Transmembrane;Transmembrane helix.;		0.0200278	4.87128	0.982014	1	744	788	766	KDIS
Locus_10107_Transcript_2/5_Confidence_0.583_Length_7493	7493	Locus_10107_Transcript_2/5_Confidence_0.583_Length_7493	7493	Locus_10107_Transcript_2/5_Confidence_0.583_Length_7493	7493	Q9ULH0	85.434	0	KDIS_HUMAN	Kinase D-interacting substrate of 220 kDa	hsa:57498	GO:0005829 \\ GO:0016021 \\ GO:0005770 \\ GO:0016020 \\ GO:0043234 \\ GO:0030165 \\ GO:0019887 \\ GO:0000186 \\ GO:1990090 \\ GO:0016482 \\ GO:0048813 \\ GO:0001701 \\ GO:0038180 \\ GO:0048011 \\ GO:0010976 \\ GO:0045859 \\	activation of MAPKK activity (GO:0000186);cellular response to nerve growth factor stimulus (GO:1990090);cytoplasmic transport (GO:0016482);dendrite morphogenesis (GO:0048813);in utero embryonic development (GO:0001701);nerve growth factor signaling pathway (GO:0038180);neurotrophin TRK receptor signaling pathway (GO:0048011);positive regulation of neuron projection development (GO:0010976);regul…	PDZ domain binding (GO:0030165);protein kinase regulator activity (GO:0019887);	cytosol (GO:0005829);integral component of membrane (GO:0016021);late endosome (GO:0005770);membrane (GO:0016020);protein complex (GO:0043234);	Alternative splicing;ANK repeat;Complete proteome;Endosome;Membrane;Neurogenesis;Phosphoprotein;Polymorphism;Reference proteome;Repeat;Transmembrane;Transmembrane helix.;		-0.152802	5.05316	0.856422	1	794	948	871	KDIS
Locus_10107_Transcript_3/5_Confidence_0.667_Length_7436	7436	Locus_10107_Transcript_3/5_Confidence_0.667_Length_7436	7436	Locus_10107_Transcript_3/5_Confidence_0.667_Length_7436	7436	Q9ULH0	84.719	0	KDIS_HUMAN	Kinase D-interacting substrate of 220 kDa	hsa:57498	GO:0005829 \\ GO:0016021 \\ GO:0005770 \\ GO:0016020 \\ GO:0043234 \\ GO:0030165 \\ GO:0019887 \\ GO:0000186 \\ GO:1990090 \\ GO:0016482 \\ GO:0048813 \\ GO:0001701 \\ GO:0038180 \\ GO:0048011 \\ GO:0010976 \\ GO:0045859 \\	activation of MAPKK activity (GO:0000186);cellular response to nerve growth factor stimulus (GO:1990090);cytoplasmic transport (GO:0016482);dendrite morphogenesis (GO:0048813);in utero embryonic development (GO:0001701);nerve growth factor signaling pathway (GO:0038180);neurotrophin TRK receptor signaling pathway (GO:0048011);positive regulation of neuron projection development (GO:0010976);regul…	PDZ domain binding (GO:0030165);protein kinase regulator activity (GO:0019887);	cytosol (GO:0005829);integral component of membrane (GO:0016021);late endosome (GO:0005770);membrane (GO:0016020);protein complex (GO:0043234);	Alternative splicing;ANK repeat;Complete proteome;Endosome;Membrane;Neurogenesis;Phosphoprotein;Polymorphism;Reference proteome;Repeat;Transmembrane;Transmembrane helix.;		-0.0649379	5.12089	0.939519	1	859	965	912	KDIS
Locus_10108_Transcript_1/5_Confidence_0.636_Length_1286	1286	Locus_10108_Transcript_1/5_Confidence_0.636_Length_1286	1286	Locus_10108_Transcript_1/5_Confidence_0.636_Length_1286	1286	A0A093EQR5	35.542	4.1e-12	A0A093EQR5_TAUER	Uncharacterized protein {ECO:0000313|EMBL:KFV16886.1}	No_KEGG	GO:0003723 \\ GO:0003964 \\	No_GOBP	RNA binding (GO:0003723);RNA-directed DNA polymerase activity (GO:0003964);	No_GOCC	Complete proteome {ECO:0000313|Proteomes:UP000053661}.;		-0.480281	0.490229	0.614105	1	28	42	35	A0A093EQR5
Locus_10108_Transcript_3/5_Confidence_0.364_Length_838	838	Locus_10108_Transcript_3/5_Confidence_0.364_Length_838	838	Locus_10108_Transcript_3/5_Confidence_0.364_Length_838	838	A8CAG3	75	6.79e-07	RL17_PHLPP	60S ribosomal protein L17	No_KEGG	GO:0015934 \\ GO:0003735 \\ GO:0006412 \\	translation (GO:0006412);	structural constituent of ribosome (GO:0003735);	large ribosomal subunit (GO:0015934);	Ribonucleoprotein;Ribosomal protein.;		-0.0124289	-0.856127	1	1	12	13	12.5	RL17
Locus_10109_Transcript_1/3_Confidence_0.667_Length_1018	1018	Locus_10109_Transcript_1/3_Confidence_0.667_Length_1018	1018	Locus_10109_Transcript_1/3_Confidence_0.667_Length_1018	1018	No_Uniprotmatch	No_%_identity	No_evalue	No_ID	No_Description	No_KEGG	No_GO	No_GOCC	No_GOBP	No_GOMF	No_keywords		-0.0860299	4.17933	0.921706	1	443	505	474	No
Locus_10109_Transcript_2/3_Confidence_0.667_Length_970	970	Locus_10109_Transcript_2/3_Confidence_0.667_Length_970	970	Locus_10109_Transcript_2/3_Confidence_0.667_Length_970	970	Q99N94	76.786	1.11e-22	RM09_MOUSE	39S ribosomal protein L9, mitochondrial	mmu:78523	GO:0005739 \\ GO:0005840 \\ GO:0044822 \\ GO:0003735 \\ GO:0006412 \\	translation (GO:0006412);	poly(A) RNA binding (GO:0044822);structural constituent of ribosome (GO:0003735);	mitochondrion (GO:0005739);ribosome (GO:0005840);	Complete proteome;Mitochondrion;Reference proteome;Ribonucleoprotein;Ribosomal protein;Transit peptide.;		-0.0464896	4.34452	0.958561	1	504	559	531.5	RM09
Locus_10109_Transcript_3/3_Confidence_0.667_Length_1010	1010	Locus_10109_Transcript_3/3_Confidence_0.667_Length_1010	1010	Locus_10109_Transcript_3/3_Confidence_0.667_Length_1010	1010	Q99N94	76.786	1.24e-22	RM09_MOUSE	39S ribosomal protein L9, mitochondrial	mmu:78523	GO:0005739 \\ GO:0005840 \\ GO:0044822 \\ GO:0003735 \\ GO:0006412 \\	translation (GO:0006412);	poly(A) RNA binding (GO:0044822);structural constituent of ribosome (GO:0003735);	mitochondrion (GO:0005739);ribosome (GO:0005840);	Complete proteome;Mitochondrion;Reference proteome;Ribonucleoprotein;Ribosomal protein;Transit peptide.;		-0.0615328	4.42447	0.943671	1	530	594	562	RM09
Locus_101097_Transcript_1/1_Confidence_1.000_Length_238	238	No_sig_nr_hit	No_sig_nr_hit	No_sig_nr_hit	No_sig_nr_hit	No_Uniprotmatch	No_%_identity	No_evalue	No_ID	No_Description	No_KEGG	No_GO	No_GOCC	No_GOBP	No_GOMF	No_keywords		0.545051	-0.803513	0.670389	1	15	11	13	No
Locus_1011_Transcript_2/6_Confidence_0.643_Length_2398	2398	Locus_1011_Transcript_2/6_Confidence_0.643_Length_2398	2398	Locus_1011_Transcript_2/6_Confidence_0.643_Length_2398	2398	Q9JJN0	49.217	2.73e-153	POLH_MOUSE	DNA polymerase eta	mmu:80905	GO:0005737 \\ GO:0005654 \\ GO:0003684 \\ GO:0003887 \\ GO:0046872 \\ GO:0071494 \\ GO:0006260 \\ GO:0000731 \\ GO:0006301 \\ GO:0006290 \\ GO:0010225 \\	cellular response to UV-C (GO:0071494);DNA replication (GO:0006260);DNA synthesis involved in DNA repair (GO:0000731);postreplication repair (GO:0006301);pyrimidine dimer repair (GO:0006290);response to UV-C (GO:0010225);	damaged DNA binding (GO:0003684);DNA-directed DNA polymerase activity (GO:0003887);metal ion binding (GO:0046872);	cytoplasm (GO:0005737);nucleoplasm (GO:0005654);	Complete proteome;DNA damage;DNA repair;DNA replication;DNA synthesis;DNA-binding;DNA-directed DNA polymerase;Isopeptide bond;Magnesium;Metal-binding;Mutator protein;Nucleotidyltransferase;Nucleus;Reference proteome;Schiff base;Transferase;Ubl conjugation.;		-0.00806849	0.0932501	1	1	25	27	26	POLH
Locus_1011_Transcript_3/6_Confidence_0.643_Length_2318	2318	Locus_1011_Transcript_3/6_Confidence_0.643_Length_2318	2318	Locus_1011_Transcript_3/6_Confidence_0.643_Length_2318	2318	Q9Y253	61.155	0	POLH_HUMAN	DNA polymerase eta	No_KEGG	GO:0005737 \\ GO:0005654 \\ GO:0003684 \\ GO:0003887 \\ GO:0046872 \\ GO:0071494 \\ GO:0006281 \\ GO:0006260 \\ GO:0000731 \\ GO:0070987 \\ GO:0006290 \\ GO:0006282 \\ GO:0010225 \\ GO:0019985 \\	cellular response to UV-C (GO:0071494);DNA repair (GO:0006281);DNA replication (GO:0006260);DNA synthesis involved in DNA repair (GO:0000731);error-free translesion synthesis (GO:0070987);pyrimidine dimer repair (GO:0006290);regulation of DNA repair (GO:0006282);response to UV-C (GO:0010225);translesion synthesis (GO:0019985);	damaged DNA binding (GO:0003684);DNA-directed DNA polymerase activity (GO:0003887);metal ion binding (GO:0046872);	cytoplasm (GO:0005737);nucleoplasm (GO:0005654);	3D-structure;Alternative splicing;Complete proteome;Direct protein sequencing;Disease mutation;DNA damage;DNA repair;DNA replication;DNA synthesis;DNA-binding;DNA-directed DNA polymerase;Isopeptide bond;Magnesium;Metal-binding;Mutator protein;Nucleotidyltransferase;Nucleus;Polymorphism;Reference proteome;Schiff base;Transferase;Ubl conjugation;Xeroderma pigmentosum.;		-0.0893481	0.285052	0.958105	1	28	32	30	POLH
Locus_1011_Transcript_4/6_Confidence_0.500_Length_1883	1883	Locus_1011_Transcript_4/6_Confidence_0.500_Length_1883	1883	Locus_1011_Transcript_4/6_Confidence_0.500_Length_1883	1883	Q9JJN0	49.19	6.54e-118	POLH_MOUSE	DNA polymerase eta	mmu:80905	GO:0005737 \\ GO:0005654 \\ GO:0003684 \\ GO:0003887 \\ GO:0046872 \\ GO:0071494 \\ GO:0006260 \\ GO:0000731 \\ GO:0006301 \\ GO:0006290 \\ GO:0010225 \\	cellular response to UV-C (GO:0071494);DNA replication (GO:0006260);DNA synthesis involved in DNA repair (GO:0000731);postreplication repair (GO:0006301);pyrimidine dimer repair (GO:0006290);response to UV-C (GO:0010225);	damaged DNA binding (GO:0003684);DNA-directed DNA polymerase activity (GO:0003887);metal ion binding (GO:0046872);	cytoplasm (GO:0005737);nucleoplasm (GO:0005654);	Complete proteome;DNA damage;DNA repair;DNA replication;DNA synthesis;DNA-binding;DNA-directed DNA polymerase;Isopeptide bond;Magnesium;Metal-binding;Mutator protein;Nucleotidyltransferase;Nucleus;Reference proteome;Schiff base;Transferase;Ubl conjugation.;		0.684948	0.292969	0.490337	1	36	24	30	POLH
Locus_1011_Transcript_5/6_Confidence_0.429_Length_1810	1810	Locus_1011_Transcript_5/6_Confidence_0.429_Length_1810	1810	Locus_1011_Transcript_5/6_Confidence_0.429_Length_1810	1810	Q9JJN0	43.094	6.88e-56	POLH_MOUSE	DNA polymerase eta	mmu:80905	GO:0005737 \\ GO:0005654 \\ GO:0003684 \\ GO:0003887 \\ GO:0046872 \\ GO:0071494 \\ GO:0006260 \\ GO:0000731 \\ GO:0006301 \\ GO:0006290 \\ GO:0010225 \\	cellular response to UV-C (GO:0071494);DNA replication (GO:0006260);DNA synthesis involved in DNA repair (GO:0000731);postreplication repair (GO:0006301);pyrimidine dimer repair (GO:0006290);response to UV-C (GO:0010225);	damaged DNA binding (GO:0003684);DNA-directed DNA polymerase activity (GO:0003887);metal ion binding (GO:0046872);	cytoplasm (GO:0005737);nucleoplasm (GO:0005654);	Complete proteome;DNA damage;DNA repair;DNA replication;DNA synthesis;DNA-binding;DNA-directed DNA polymerase;Isopeptide bond;Magnesium;Metal-binding;Mutator protein;Nucleotidyltransferase;Nucleus;Reference proteome;Schiff base;Transferase;Ubl conjugation.;		-0.0172802	-0.0137483	1	1	23	25	24	POLH
Locus_10110_Transcript_2/3_Confidence_0.400_Length_2380	2380	Locus_10110_Transcript_2/3_Confidence_0.400_Length_2380	2380	Locus_10110_Transcript_2/3_Confidence_0.400_Length_2380	2380	Q9NYI0	48.033	0	PSD3_HUMAN	PH and SEC7 domain-containing protein 3	hsa:23362	GO:0030054 \\ GO:0014069 \\ GO:0045211 \\ GO:0005086 \\ GO:0032012 \\	regulation of ARF protein signal transduction (GO:0032012);	ARF guanyl-nucleotide exchange factor activity (GO:0005086);	cell junction (GO:0030054);postsynaptic density (GO:0014069);postsynaptic membrane (GO:0045211);	Alternative splicing;Cell junction;Cell membrane;Coiled coil;Complete proteome;Guanine-nucleotide releasing factor;Membrane;Phosphoprotein;Polymorphism;Postsynaptic cell membrane;Reference proteome;Synapse.;		0.102343	-0.128146	0.944611	1	22	22	22	PSD3
Locus_10110_Transcript_3/3_Confidence_0.600_Length_12630	12630	Locus_10110_Transcript_3/3_Confidence_0.600_Length_12630	12630	Locus_10110_Transcript_3/3_Confidence_0.600_Length_12630	12630	Q9NYI0	59.679	0	PSD3_HUMAN	PH and SEC7 domain-containing protein 3	hsa:23362	GO:0030054 \\ GO:0014069 \\ GO:0045211 \\ GO:0005086 \\ GO:0032012 \\	regulation of ARF protein signal transduction (GO:0032012);	ARF guanyl-nucleotide exchange factor activity (GO:0005086);	cell junction (GO:0030054);postsynaptic density (GO:0014069);postsynaptic membrane (GO:0045211);	Alternative splicing;Cell junction;Cell membrane;Coiled coil;Complete proteome;Guanine-nucleotide releasing factor;Membrane;Phosphoprotein;Polymorphism;Postsynaptic cell membrane;Reference proteome;Synapse.;		0.228347	3.34772	0.790719	1	276	253	264.5	PSD3
Locus_101110_Transcript_1/1_Confidence_1.000_Length_493	493	No_sig_nr_hit	No_sig_nr_hit	No_sig_nr_hit	No_sig_nr_hit	No_Uniprotmatch	No_%_identity	No_evalue	No_ID	No_Description	No_KEGG	No_GO	No_GOCC	No_GOBP	No_GOMF	No_keywords		-0.257095	1.71698	0.781424	1	74	95	84.5	No
Locus_10113_Transcript_1/3_Confidence_0.333_Length_999	999	Locus_10113_Transcript_1/3_Confidence_0.333_Length_999	999	Locus_10113_Transcript_1/3_Confidence_0.333_Length_999	999	Q0P5L5	82.018	1.13e-140	SUMF1_BOVIN	Sulfatase-modifying factor 1	bta:536435	GO:0005788 \\ GO:0046872 \\ GO:0016491 \\	No_GOBP	metal ion binding (GO:0046872);oxidoreductase activity (GO:0016491);	endoplasmic reticulum lumen (GO:0005788);	Calcium;Complete proteome;Disulfide bond;Endoplasmic reticulum;Glycoprotein;Metal-binding;Oxidoreductase;Reference proteome;Signal.;		0.471831	-0.283799	0.641346	1	22	17	19.5	SUMF1
Locus_10113_Transcript_2/3_Confidence_0.667_Length_1526	1526	Locus_10113_Transcript_2/3_Confidence_0.667_Length_1526	1526	Locus_10113_Transcript_2/3_Confidence_0.667_Length_1526	1526	Q8R0F3	84.477	6.55e-176	SUMF1_MOUSE	Sulfatase-modifying factor 1	mmu:58911	GO:0005783 \\ GO:0005788 \\ GO:0046872 \\ GO:0016491 \\ GO:0042803 \\	No_GOBP	metal ion binding (GO:0046872);oxidoreductase activity (GO:0016491);protein homodimerization activity (GO:0042803);	endoplasmic reticulum (GO:0005783);endoplasmic reticulum lumen (GO:0005788);	Calcium;Complete proteome;Disulfide bond;Endoplasmic reticulum;Glycoprotein;Metal-binding;Oxidoreductase;Reference proteome;Signal.;		-0.349096	1.80457	0.707318	1	76	104	90	SUMF1
Locus_10114_Transcript_1/1_Confidence_1.000_Length_1189	1189	Locus_10114_Transcript_1/1_Confidence_1.000_Length_1189	1189	Locus_10114_Transcript_1/1_Confidence_1.000_Length_1189	1189	Q9WUH4	71.53	5.5e-150	FHL1_RAT	Four and a half LIM domains protein 1	No_KEGG	GO:0005737 \\ GO:0008270 \\ GO:0030154 \\ GO:0007275 \\	cell differentiation (GO:0030154);multicellular organismal development (GO:0007275);	zinc ion binding (GO:0008270);	cytoplasm (GO:0005737);	Acetylation;Complete proteome;Cytoplasm;Developmental protein;Differentiation;Isopeptide bond;LIM domain;Metal-binding;Reference proteome;Repeat;Ubl conjugation;Zinc;Zinc-finger.;		-0.0738517	4.67702	0.932189	1	629	711	670	FHL1
Locus_10115_Transcript_1/5_Confidence_0.636_Length_7126	7126	Locus_10115_Transcript_1/5_Confidence_0.636_Length_7126	7126	Locus_10115_Transcript_1/5_Confidence_0.636_Length_7126	7126	P97260	75.867	0	SCAP_CRIGR	Sterol regulatory element-binding protein cleavage-activating protein	cge:100689048	GO:0005783 \\ GO:0005789 \\ GO:0012507 \\ GO:0000139 \\ GO:0016021 \\ GO:0016020 \\ GO:0015485 \\ GO:0008022 \\ GO:0090110 \\ GO:0008203 \\ GO:0072600 \\ GO:0032933 \\ GO:0035105 \\	cargo loading into COPII-coated vesicle (GO:0090110);cholesterol metabolic process (GO:0008203);establishment of protein localization to Golgi (GO:0072600);SREBP signaling pathway (GO:0032933);sterol regulatory element binding protein import into nucleus (GO:0035105);	cholesterol binding (GO:0015485);protein C-terminus binding (GO:0008022);	endoplasmic reticulum (GO:0005783);endoplasmic reticulum membrane (GO:0005789);ER to Golgi transport vesicle membrane (GO:0012507);Golgi membrane (GO:0000139);integral component of membrane (GO:0016021);membrane (GO:0016020);	Cholesterol metabolism;Cytoplasmic vesicle;Endoplasmic reticulum;Glycoprotein;Golgi apparatus;Lipid metabolism;Membrane;Phosphoprotein;Repeat;Steroid metabolism;Sterol metabolism;Transmembrane;Transmembrane helix;WD repeat.;		-0.0178851	3.73069	0.98812	1	332	361	346.5	SCAP
Locus_10115_Transcript_2/5_Confidence_0.636_Length_7073	7073	Locus_10115_Transcript_2/5_Confidence_0.636_Length_7073	7073	Locus_10115_Transcript_2/5_Confidence_0.636_Length_7073	7073	P97260	75.867	0	SCAP_CRIGR	Sterol regulatory element-binding protein cleavage-activating protein	cge:100689048	GO:0005783 \\ GO:0005789 \\ GO:0012507 \\ GO:0000139 \\ GO:0016021 \\ GO:0016020 \\ GO:0015485 \\ GO:0008022 \\ GO:0090110 \\ GO:0008203 \\ GO:0072600 \\ GO:0032933 \\ GO:0035105 \\	cargo loading into COPII-coated vesicle (GO:0090110);cholesterol metabolic process (GO:0008203);establishment of protein localization to Golgi (GO:0072600);SREBP signaling pathway (GO:0032933);sterol regulatory element binding protein import into nucleus (GO:0035105);	cholesterol binding (GO:0015485);protein C-terminus binding (GO:0008022);	endoplasmic reticulum (GO:0005783);endoplasmic reticulum membrane (GO:0005789);ER to Golgi transport vesicle membrane (GO:0012507);Golgi membrane (GO:0000139);integral component of membrane (GO:0016021);membrane (GO:0016020);	Cholesterol metabolism;Cytoplasmic vesicle;Endoplasmic reticulum;Glycoprotein;Golgi apparatus;Lipid metabolism;Membrane;Phosphoprotein;Repeat;Steroid metabolism;Sterol metabolism;Transmembrane;Transmembrane helix;WD repeat.;		-0.144039	3.79531	0.867997	1	332	394	363	SCAP
Locus_10117_Transcript_6/8_Confidence_0.095_Length_1170	1170	Locus_10117_Transcript_6/8_Confidence_0.095_Length_1170	1170	Locus_10117_Transcript_6/8_Confidence_0.095_Length_1170	1170	Q6DCE3	63.787	1.43e-111	ZNT9_XENLA	Zinc transporter 9	xla:447051	GO:0016021 \\ GO:0005634 \\ GO:0008324 \\ GO:0006355 \\ GO:0006351 \\ GO:0006829 \\	regulation of transcription, DNA-templated (GO:0006355);transcription, DNA-templated (GO:0006351);zinc II ion transport (GO:0006829);	cation transmembrane transporter activity (GO:0008324);	integral component of membrane (GO:0016021);nucleus (GO:0005634);	Ion transport;Membrane;Nucleus;Transcription;Transcription regulation;Transmembrane;Transmembrane helix;Transport;Zinc;Zinc transport.;		0.102497	0.287032	0.958105	1	30	30	30	ZNT9
Locus_10117_Transcript_7/8_Confidence_0.667_Length_9214	9214	Locus_10117_Transcript_7/8_Confidence_0.667_Length_9214	9214	Locus_10117_Transcript_7/8_Confidence_0.667_Length_9214	9214	Q6DCE3	80.297	0	ZNT9_XENLA	Zinc transporter 9	xla:447051	GO:0016021 \\ GO:0005634 \\ GO:0008324 \\ GO:0006355 \\ GO:0006351 \\ GO:0006829 \\	regulation of transcription, DNA-templated (GO:0006355);transcription, DNA-templated (GO:0006351);zinc II ion transport (GO:0006829);	cation transmembrane transporter activity (GO:0008324);	integral component of membrane (GO:0016021);nucleus (GO:0005634);	Ion transport;Membrane;Nucleus;Transcription;Transcription regulation;Transmembrane;Transmembrane helix;Transport;Zinc;Zinc transport.;		0.0606777	5.51285	0.943199	1	1178	1213	1195.5	ZNT9
Locus_10118_Transcript_2/3_Confidence_0.333_Length_1752	1752	Locus_10118_Transcript_2/3_Confidence_0.333_Length_1752	1752	Locus_10118_Transcript_2/3_Confidence_0.333_Length_1752	1752	Q8K358	92.105	4.82e-13	PIGU_MOUSE	Phosphatidylinositol glycan anchor biosynthesis class U protein	No_KEGG	GO:0042765 \\ GO:0016020 \\ GO:0005886 \\ GO:0016255 \\ GO:0006506 \\ GO:0046425 \\	attachment of GPI anchor to protein (GO:0016255);GPI anchor biosynthetic process (GO:0006506);regulation of JAK-STAT cascade (GO:0046425);	No_GOMF	GPI-anchor transamidase complex (GO:0042765);membrane (GO:0016020);plasma membrane (GO:0005886);	Complete proteome;Endoplasmic reticulum;GPI-anchor biosynthesis;Membrane;Reference proteome;Transmembrane;Transmembrane helix.;		0.0610486	2.4162	0.951032	1	136	140	138	PIGU
Locus_10118_Transcript_3/3_Confidence_0.667_Length_2731	2731	Locus_10118_Transcript_3/3_Confidence_0.667_Length_2731	2731	Locus_10118_Transcript_3/3_Confidence_0.667_Length_2731	2731	Q8CHJ1	86.058	0	PIGU_RAT	Phosphatidylinositol glycan anchor biosynthesis class U protein	rno:353304	GO:0042765 \\ GO:0006506 \\	GPI anchor biosynthetic process (GO:0006506);	No_GOMF	GPI-anchor transamidase complex (GO:0042765);	Alternative splicing;Complete proteome;Endoplasmic reticulum;GPI-anchor biosynthesis;Membrane;Reference proteome;Transmembrane;Transmembrane helix.;		0.207003	3.18113	0.810766	1	244	227	235.5	PIGU
Locus_1012_Transcript_2/9_Confidence_0.690_Length_4900	4900	Locus_1012_Transcript_2/9_Confidence_0.690_Length_4900	4900	Locus_1012_Transcript_2/9_Confidence_0.690_Length_4900	4900	Q80XU3	96.078	1.22e-18	NUCKS_MOUSE	Nuclear ubiquitous casein and cyclin-dependent kinase substrate 1	mmu:98415	GO:0005737 \\ GO:0005634 \\ GO:0044822 \\ GO:0001077 \\ GO:0042593 \\ GO:0046628 \\ GO:0045944 \\ GO:0006366 \\	glucose homeostasis (GO:0042593);positive regulation of insulin receptor signaling pathway (GO:0046628);positive regulation of transcription from RNA polymerase II promoter (GO:0045944);transcription from RNA polymerase II promoter (GO:0006366);	poly(A) RNA binding (GO:0044822);transcriptional activator activity, RNA polymerase II core promoter proximal region sequence-specific binding (GO:0001077);	cytoplasm (GO:0005737);nucleus (GO:0005634);	Complete proteome;Nucleus;Phosphoprotein;Reference proteome.;		-0.159614	4.45066	0.85158	1	521	625	573	NUCKS
Locus_1012_Transcript_3/9_Confidence_0.690_Length_4872	4872	Locus_1012_Transcript_3/9_Confidence_0.690_Length_4872	4872	Locus_1012_Transcript_3/9_Confidence_0.690_Length_4872	4872	Q80XU3	96.078	1.22e-18	NUCKS_MOUSE	Nuclear ubiquitous casein and cyclin-dependent kinase substrate 1	mmu:98415	GO:0005737 \\ GO:0005634 \\ GO:0044822 \\ GO:0001077 \\ GO:0042593 \\ GO:0046628 \\ GO:0045944 \\ GO:0006366 \\	glucose homeostasis (GO:0042593);positive regulation of insulin receptor signaling pathway (GO:0046628);positive regulation of transcription from RNA polymerase II promoter (GO:0045944);transcription from RNA polymerase II promoter (GO:0006366);	poly(A) RNA binding (GO:0044822);transcriptional activator activity, RNA polymerase II core promoter proximal region sequence-specific binding (GO:0001077);	cytoplasm (GO:0005737);nucleus (GO:0005634);	Complete proteome;Nucleus;Phosphoprotein;Reference proteome.;		-0.0057587	4.37995	0.997473	1	524	565	544.5	NUCKS
Locus_1012_Transcript_4/9_Confidence_0.069_Length_1130	1130	Locus_1012_Transcript_4/9_Confidence_0.069_Length_1130	1130	Locus_1012_Transcript_4/9_Confidence_0.069_Length_1130	1130	Q80XU3	96.078	3.4e-20	NUCKS_MOUSE	Nuclear ubiquitous casein and cyclin-dependent kinase substrate 1	mmu:98415	GO:0005737 \\ GO:0005634 \\ GO:0044822 \\ GO:0001077 \\ GO:0042593 \\ GO:0046628 \\ GO:0045944 \\ GO:0006366 \\	glucose homeostasis (GO:0042593);positive regulation of insulin receptor signaling pathway (GO:0046628);positive regulation of transcription from RNA polymerase II promoter (GO:0045944);transcription from RNA polymerase II promoter (GO:0006366);	poly(A) RNA binding (GO:0044822);transcriptional activator activity, RNA polymerase II core promoter proximal region sequence-specific binding (GO:0001077);	cytoplasm (GO:0005737);nucleus (GO:0005634);	Complete proteome;Nucleus;Phosphoprotein;Reference proteome.;		-0.0266143	2.58934	0.982566	1	149	163	156	NUCKS
Locus_1012_Transcript_5/9_Confidence_0.517_Length_4762	4762	Locus_1012_Transcript_5/9_Confidence_0.517_Length_4762	4762	Locus_1012_Transcript_5/9_Confidence_0.517_Length_4762	4762	Q80XU3	96.078	1.18e-18	NUCKS_MOUSE	Nuclear ubiquitous casein and cyclin-dependent kinase substrate 1	mmu:98415	GO:0005737 \\ GO:0005634 \\ GO:0044822 \\ GO:0001077 \\ GO:0042593 \\ GO:0046628 \\ GO:0045944 \\ GO:0006366 \\	glucose homeostasis (GO:0042593);positive regulation of insulin receptor signaling pathway (GO:0046628);positive regulation of transcription from RNA polymerase II promoter (GO:0045944);transcription from RNA polymerase II promoter (GO:0006366);	poly(A) RNA binding (GO:0044822);transcriptional activator activity, RNA polymerase II core promoter proximal region sequence-specific binding (GO:0001077);	cytoplasm (GO:0005737);nucleus (GO:0005634);	Complete proteome;Nucleus;Phosphoprotein;Reference proteome.;		-0.208049	4.35254	0.805896	1	478	593	535.5	NUCKS
Locus_10120_Transcript_2/6_Confidence_0.688_Length_3994	3994	Locus_10120_Transcript_2/6_Confidence_0.688_Length_3994	3994	Locus_10120_Transcript_2/6_Confidence_0.688_Length_3994	3994	B1AQJ2	64.353	0	UBP36_MOUSE	Ubiquitin carboxyl-terminal hydrolase 36	mmu:72344	GO:0005730 \\ GO:0005634 \\ GO:0044822 \\ GO:0004843 \\ GO:1903955 \\ GO:0016579 \\ GO:1903146 \\ GO:0006511 \\	positive regulation of protein targeting to mitochondrion (GO:1903955);protein deubiquitination (GO:0016579);regulation of mitophagy (GO:1903146);ubiquitin-dependent protein catabolic process (GO:0006511);	poly(A) RNA binding (GO:0044822);thiol-dependent ubiquitin-specific protease activity (GO:0004843);	nucleolus (GO:0005730);nucleus (GO:0005634);	Complete proteome;Hydrolase;Nucleus;Phosphoprotein;Protease;Reference proteome;Thiol protease;Ubl conjugation pathway.;		-0.0635728	1.04006	0.974885	1	49	55	52	UBP36
Locus_10120_Transcript_3/6_Confidence_0.688_Length_4130	4130	Locus_10120_Transcript_3/6_Confidence_0.688_Length_4130	4130	Locus_10120_Transcript_3/6_Confidence_0.688_Length_4130	4130	B1AQJ2	64.353	0	UBP36_MOUSE	Ubiquitin carboxyl-terminal hydrolase 36	mmu:72344	GO:0005730 \\ GO:0005634 \\ GO:0044822 \\ GO:0004843 \\ GO:1903955 \\ GO:0016579 \\ GO:1903146 \\ GO:0006511 \\	positive regulation of protein targeting to mitochondrion (GO:1903955);protein deubiquitination (GO:0016579);regulation of mitophagy (GO:1903146);ubiquitin-dependent protein catabolic process (GO:0006511);	poly(A) RNA binding (GO:0044822);thiol-dependent ubiquitin-specific protease activity (GO:0004843);	nucleolus (GO:0005730);nucleus (GO:0005634);	Complete proteome;Hydrolase;Nucleus;Phosphoprotein;Protease;Reference proteome;Thiol protease;Ubl conjugation pathway.;		-0.0413366	0.677814	0.967869	1	38	42	40	UBP36
Locus_10120_Transcript_4/6_Confidence_0.688_Length_4252	4252	Locus_10120_Transcript_4/6_Confidence_0.688_Length_4252	4252	Locus_10120_Transcript_4/6_Confidence_0.688_Length_4252	4252	B1AQJ2	64.353	0	UBP36_MOUSE	Ubiquitin carboxyl-terminal hydrolase 36	mmu:72344	GO:0005730 \\ GO:0005634 \\ GO:0044822 \\ GO:0004843 \\ GO:1903955 \\ GO:0016579 \\ GO:1903146 \\ GO:0006511 \\	positive regulation of protein targeting to mitochondrion (GO:1903955);protein deubiquitination (GO:0016579);regulation of mitophagy (GO:1903146);ubiquitin-dependent protein catabolic process (GO:0006511);	poly(A) RNA binding (GO:0044822);thiol-dependent ubiquitin-specific protease activity (GO:0004843);	nucleolus (GO:0005730);nucleus (GO:0005634);	Complete proteome;Hydrolase;Nucleus;Phosphoprotein;Protease;Reference proteome;Thiol protease;Ubl conjugation pathway.;		-0.538204	1.0475	0.571848	1	41	64	52.5	UBP36
Locus_10120_Transcript_5/6_Confidence_0.688_Length_4498	4498	Locus_10120_Transcript_5/6_Confidence_0.688_Length_4498	4498	Locus_10120_Transcript_5/6_Confidence_0.688_Length_4498	4498	B1AQJ2	64.353	0	UBP36_MOUSE	Ubiquitin carboxyl-terminal hydrolase 36	mmu:72344	GO:0005730 \\ GO:0005634 \\ GO:0044822 \\ GO:0004843 \\ GO:1903955 \\ GO:0016579 \\ GO:1903146 \\ GO:0006511 \\	positive regulation of protein targeting to mitochondrion (GO:1903955);protein deubiquitination (GO:0016579);regulation of mitophagy (GO:1903146);ubiquitin-dependent protein catabolic process (GO:0006511);	poly(A) RNA binding (GO:0044822);thiol-dependent ubiquitin-specific protease activity (GO:0004843);	nucleolus (GO:0005730);nucleus (GO:0005634);	Complete proteome;Hydrolase;Nucleus;Phosphoprotein;Protease;Reference proteome;Thiol protease;Ubl conjugation pathway.;		-0.159746	1.11683	0.881294	1	50	60	55	UBP36
Locus_10120_Transcript_6/6_Confidence_0.688_Length_3915	3915	Locus_10120_Transcript_6/6_Confidence_0.688_Length_3915	3915	Locus_10120_Transcript_6/6_Confidence_0.688_Length_3915	3915	B1AQJ2	64.353	0	UBP36_MOUSE	Ubiquitin carboxyl-terminal hydrolase 36	mmu:72344	GO:0005730 \\ GO:0005634 \\ GO:0044822 \\ GO:0004843 \\ GO:1903955 \\ GO:0016579 \\ GO:1903146 \\ GO:0006511 \\	positive regulation of protein targeting to mitochondrion (GO:1903955);protein deubiquitination (GO:0016579);regulation of mitophagy (GO:1903146);ubiquitin-dependent protein catabolic process (GO:0006511);	poly(A) RNA binding (GO:0044822);thiol-dependent ubiquitin-specific protease activity (GO:0004843);	nucleolus (GO:0005730);nucleus (GO:0005634);	Complete proteome;Hydrolase;Nucleus;Phosphoprotein;Protease;Reference proteome;Thiol protease;Ubl conjugation pathway.;		-0.0737653	0.95749	0.973436	1	46	52	49	UBP36
Locus_101218_Transcript_1/1_Confidence_1.000_Length_521	521	No_sig_nr_hit	No_sig_nr_hit	No_sig_nr_hit	No_sig_nr_hit	No_Uniprotmatch	No_%_identity	No_evalue	No_ID	No_Description	No_KEGG	No_GO	No_GOCC	No_GOBP	No_GOMF	No_keywords		0.724269	-0.709023	0.5462	1	17	11	14	No
Locus_10122_Transcript_1/1_Confidence_1.000_Length_877	877	No_sig_nr_hit	No_sig_nr_hit	No_sig_nr_hit	No_sig_nr_hit	No_Uniprotmatch	No_%_identity	No_evalue	No_ID	No_Description	No_KEGG	No_GO	No_GOCC	No_GOBP	No_GOMF	No_keywords		0.00616649	2.78592	1	1	173	185	179	No
Locus_10125_Transcript_1/3_Confidence_0.750_Length_4655	4655	Locus_10125_Transcript_1/3_Confidence_0.750_Length_4655	4655	Locus_10125_Transcript_1/3_Confidence_0.750_Length_4655	4655	Q99550	55.004	0	MPP9_HUMAN	M-phase phosphoprotein 9	hsa:10198	GO:0005814 \\ GO:0005813 \\ GO:0005737 \\ GO:0005794 \\ GO:0000139 \\ GO:0016020 \\ GO:0005886 \\	No_GOBP	No_GOMF	centriole (GO:0005814);centrosome (GO:0005813);cytoplasm (GO:0005737);Golgi apparatus (GO:0005794);Golgi membrane (GO:0000139);membrane (GO:0016020);plasma membrane (GO:0005886);	Alternative splicing;Coiled coil;Complete proteome;Cytoplasm;Cytoskeleton;Golgi apparatus;Membrane;Phosphoprotein;Polymorphism;Reference proteome.;		-0.0994102	1.61551	0.932273	1	73	84	78.5	MPP9
Locus_10125_Transcript_2/3_Confidence_0.500_Length_1783	1783	Locus_10125_Transcript_2/3_Confidence_0.500_Length_1783	1783	Locus_10125_Transcript_2/3_Confidence_0.500_Length_1783	1783	Q99550	66.929	2.42e-41	MPP9_HUMAN	M-phase phosphoprotein 9	hsa:10198	GO:0005814 \\ GO:0005813 \\ GO:0005737 \\ GO:0005794 \\ GO:0000139 \\ GO:0016020 \\ GO:0005886 \\	No_GOBP	No_GOMF	centriole (GO:0005814);centrosome (GO:0005813);cytoplasm (GO:0005737);Golgi apparatus (GO:0005794);Golgi membrane (GO:0000139);membrane (GO:0016020);plasma membrane (GO:0005886);	Alternative splicing;Coiled coil;Complete proteome;Cytoplasm;Cytoskeleton;Golgi apparatus;Membrane;Phosphoprotein;Polymorphism;Reference proteome.;		0.384817	0.0710271	0.714157	1	28	23	25.5	MPP9
Locus_10126_Transcript_1/1_Confidence_1.000_Length_654	654	No_sig_nr_hit	No_sig_nr_hit	No_sig_nr_hit	No_sig_nr_hit	No_Uniprotmatch	No_%_identity	No_evalue	No_ID	No_Description	No_KEGG	No_GO	No_GOCC	No_GOBP	No_GOMF	No_keywords		-0.0611085	1.77695	0.95448	1	83	93	88	No
Locus_10127_Transcript_1/4_Confidence_0.500_Length_2183	2183	Locus_10127_Transcript_1/4_Confidence_0.500_Length_2183	2183	Locus_10127_Transcript_1/4_Confidence_0.500_Length_2183	2183	Q17RB8	41.667	3.84e-138	LONF1_HUMAN	LON peptidase N-terminal domain and RING finger protein 1	hsa:91694	GO:0004176 \\ GO:0008270 \\	No_GOBP	ATP-dependent peptidase activity (GO:0004176);zinc ion binding (GO:0008270);	No_GOCC	Alternative splicing;Complete proteome;Metal-binding;Polymorphism;Reference proteome;Repeat;TPR repeat;Zinc;Zinc-finger.;		0.177598	1.59222	0.845449	1	79	75	77	LONF1
Locus_10127_Transcript_2/4_Confidence_0.667_Length_1910	1910	Locus_10127_Transcript_2/4_Confidence_0.667_Length_1910	1910	Locus_10127_Transcript_2/4_Confidence_0.667_Length_1910	1910	Q17RB8	44.53	2e-132	LONF1_HUMAN	LON peptidase N-terminal domain and RING finger protein 1	hsa:91694	GO:0004176 \\ GO:0008270 \\	No_GOBP	ATP-dependent peptidase activity (GO:0004176);zinc ion binding (GO:0008270);	No_GOCC	Alternative splicing;Complete proteome;Metal-binding;Polymorphism;Reference proteome;Repeat;TPR repeat;Zinc;Zinc-finger.;		0.102738	1.43711	0.923887	1	69	69	69	LONF1
Locus_10127_Transcript_3/4_Confidence_0.667_Length_2572	2572	Locus_10127_Transcript_3/4_Confidence_0.667_Length_2572	2572	Locus_10127_Transcript_3/4_Confidence_0.667_Length_2572	2572	Q496Y0	36.937	9.06e-75	LONF3_HUMAN	LON peptidase N-terminal domain and RING finger protein 3	hsa:79836	GO:0004176 \\ GO:0008270 \\	No_GOBP	ATP-dependent peptidase activity (GO:0004176);zinc ion binding (GO:0008270);	No_GOCC	Alternative splicing;Complete proteome;Metal-binding;Polymorphism;Reference proteome;Repeat;TPR repeat;Zinc;Zinc-finger.;		0.145721	1.39646	0.901549	1	68	66	67	LONF3
Locus_10129_Transcript_1/1_Confidence_1.000_Length_3628	3628	Locus_10129_Transcript_1/1_Confidence_1.000_Length_3628	3628	Locus_10129_Transcript_1/1_Confidence_1.000_Length_3628	3628	Q8NEY1	85.484	8.54e-24	NAV1_HUMAN	Neuron navigator 1	hsa:89796	GO:0005737 \\ GO:0005874 \\ GO:0001578 \\ GO:0001764 \\	microtubule bundle formation (GO:0001578);neuron migration (GO:0001764);	No_GOMF	cytoplasm (GO:0005737);microtubule (GO:0005874);	Acetylation;Alternative splicing;Coiled coil;Complete proteome;Cytoplasm;Cytoskeleton;Developmental protein;Differentiation;Microtubule;Neurogenesis;Phosphoprotein;Polymorphism;Reference proteome.;		0.117231	4.53116	0.891078	1	607	601	604	NAV1
Locus_10130_Transcript_1/1_Confidence_1.000_Length_3165	3165	Locus_10130_Transcript_1/1_Confidence_1.000_Length_3165	3165	Locus_10130_Transcript_1/1_Confidence_1.000_Length_3165	3165	Q66T02	65.253	0	PKHG5_MOUSE	Pleckstrin homology domain-containing family G member 5	mmu:269608	GO:0005911 \\ GO:0005737 \\ GO:0030139 \\ GO:0030027 \\ GO:0048471 \\ GO:0005886 \\ GO:0005089 \\ GO:0004871 \\ GO:0035767 \\ GO:0043542 \\ GO:0043547 \\ GO:0043123 \\ GO:0035023 \\ GO:0007165 \\	endothelial cell chemotaxis (GO:0035767);endothelial cell migration (GO:0043542);positive regulation of GTPase activity (GO:0043547);positive regulation of I-kappaB kinase/NF-kappaB signaling (GO:0043123);regulation of Rho protein signal transduction (GO:0035023);signal transduction (GO:0007165);	Rho guanyl-nucleotide exchange factor activity (GO:0005089);signal transducer activity (GO:0004871);	cell-cell junction (GO:0005911);cytoplasm (GO:0005737);endocytic vesicle (GO:0030139);lamellipodium (GO:0030027);perinuclear region of cytoplasm (GO:0048471);plasma membrane (GO:0005886);	Alternative splicing;Cell junction;Cell membrane;Cell projection;Complete proteome;Cytoplasm;Membrane;Phosphoprotein;Reference proteome.;		0.042192	4.11165	0.963517	1	442	461	451.5	PKHG5
Locus_101305_Transcript_1/1_Confidence_1.000_Length_299	299	No_sig_nr_hit	No_sig_nr_hit	No_sig_nr_hit	No_sig_nr_hit	No_Uniprotmatch	No_%_identity	No_evalue	No_ID	No_Description	No_KEGG	No_GO	No_GOCC	No_GOBP	No_GOMF	No_keywords		0.306627	-0.711883	0.841685	1	15	13	14	No
Locus_10132_Transcript_2/6_Confidence_0.643_Length_6338	6338	Locus_10132_Transcript_2/6_Confidence_0.643_Length_6338	6338	Locus_10132_Transcript_2/6_Confidence_0.643_Length_6338	6338	Q98864	75.945	0	PTC1_DANRE	Protein patched homolog 1	dre:30181	GO:0016021 \\ GO:0008158 \\ GO:0043010 \\ GO:0010002 \\ GO:0048635 \\ GO:0045879 \\ GO:0001649 \\ GO:0009954 \\ GO:0031290 \\ GO:0007224 \\	camera-type eye development (GO:0043010);cardioblast differentiation (GO:0010002);negative regulation of muscle organ development (GO:0048635);negative regulation of smoothened signaling pathway (GO:0045879);osteoblast differentiation (GO:0001649);proximal/distal pattern formation (GO:0009954);retinal ganglion cell axon guidance (GO:0031290);smoothened signaling pathway (GO:0007224);	hedgehog receptor activity (GO:0008158);	integral component of membrane (GO:0016021);	Complete proteome;Glycoprotein;Membrane;Receptor;Reference proteome;Transmembrane;Transmembrane helix.;		0.612887	-0.461339	0.538841	1	20	14	17	PTC1
Locus_10132_Transcript_3/6_Confidence_0.643_Length_6360	6360	Locus_10132_Transcript_3/6_Confidence_0.643_Length_6360	6360	Locus_10132_Transcript_3/6_Confidence_0.643_Length_6360	6360	Q98864	75.945	0	PTC1_DANRE	Protein patched homolog 1	dre:30181	GO:0016021 \\ GO:0008158 \\ GO:0043010 \\ GO:0010002 \\ GO:0048635 \\ GO:0045879 \\ GO:0001649 \\ GO:0009954 \\ GO:0031290 \\ GO:0007224 \\	camera-type eye development (GO:0043010);cardioblast differentiation (GO:0010002);negative regulation of muscle organ development (GO:0048635);negative regulation of smoothened signaling pathway (GO:0045879);osteoblast differentiation (GO:0001649);proximal/distal pattern formation (GO:0009954);retinal ganglion cell axon guidance (GO:0031290);smoothened signaling pathway (GO:0007224);	hedgehog receptor activity (GO:0008158);	integral component of membrane (GO:0016021);	Complete proteome;Glycoprotein;Membrane;Receptor;Reference proteome;Transmembrane;Transmembrane helix.;		0.724269	-0.709023	0.5462	1	17	11	14	PTC1
Locus_10133_Transcript_1/1_Confidence_1.000_Length_3626	3626	Locus_10133_Transcript_1/1_Confidence_1.000_Length_3626	3626	Locus_10133_Transcript_1/1_Confidence_1.000_Length_3626	3626	P49585	88.587	0	PCY1A_HUMAN	Choline-phosphate cytidylyltransferase A	hsa:5130	GO:0005829 \\ GO:0005789 \\ GO:0042587 \\ GO:0004105 \\ GO:0008289 \\ GO:0006657 \\ GO:0046474 \\ GO:0006656 \\ GO:0006644 \\ GO:0044281 \\	CDP-choline pathway (GO:0006657);glycerophospholipid biosynthetic process (GO:0046474);phosphatidylcholine biosynthetic process (GO:0006656);phospholipid metabolic process (GO:0006644);small molecule metabolic process (GO:0044281);	choline-phosphate cytidylyltransferase activity (GO:0004105);lipid binding (GO:0008289);	cytosol (GO:0005829);endoplasmic reticulum membrane (GO:0005789);glycogen granule (GO:0042587);	Acetylation;Complete proteome;Cone-rod dystrophy;Cytoplasm;Disease mutation;Dwarfism;Lipid biosynthesis;Lipid metabolism;Membrane;Nucleotidyltransferase;Phospholipid biosynthesis;Phospholipid metabolism;Phosphoprotein;Reference proteome;Repeat;Transferase;Ubl conjugation.;		0.0958851	5.29397	0.909924	1	1024	1029	1026.5	PCY1A
Locus_101349_Transcript_1/1_Confidence_1.000_Length_632	632	Locus_101349_Transcript_1/1_Confidence_1.000_Length_632	632	Locus_101349_Transcript_1/1_Confidence_1.000_Length_632	632	Q13936	98.013	8.36e-72	CAC1C_HUMAN	Voltage-dependent L-type calcium channel subunit alpha-1C	hsa:775	GO:0002095 \\ GO:0005737 \\ GO:0005829 \\ GO:0043198 \\ GO:0016021 \\ GO:0043025 \\ GO:0005886 \\ GO:0014069 \\ GO:0005891 \\ GO:0030018 \\ GO:0051393 \\ GO:0005516 \\ GO:0046872 \\ GO:0005245 \\ GO:0007628 \\ GO:0007411 \\ GO:0017156 \\ GO:0070588 \\ GO:0060402 \\ GO:0035585 \\ GO:0061337 \\ GO:0086064 \\ GO:0006112 \\ GO:0042593 \\ GO:0030252 \\ GO:0030073 \\ GO:0086010 \\ GO:0007204 \\ GO:0008…	adult walking behavior (GO:0007628);axon guidance (GO:0007411);calcium ion regulated exocytosis (GO:0017156);calcium ion transmembrane transport (GO:0070588);calcium ion transport into cytosol (GO:0060402);calcium-mediated signaling using extracellular calcium source (GO:0035585);cardiac conduction (GO:0061337);cell communication by electrical coupling involved in cardiac conduction (GO:0086064);…	alpha-actinin binding (GO:0051393);calmodulin binding (GO:0005516);metal ion binding (GO:0046872);voltage-gated calcium channel activity (GO:0005245);	caveolar macromolecular signaling complex (GO:0002095);cytoplasm (GO:0005737);cytosol (GO:0005829);dendritic shaft (GO:0043198);integral component of membrane (GO:0016021);neuronal cell body (GO:0043025);plasma membrane (GO:0005886);postsynaptic density (GO:0014069);voltage-gated calcium channel complex (GO:0005891);Z disc (GO:0030018);	3D-structure;Alternative splicing;Autism;Autism spectrum disorder;Brugada syndrome;Calcium;Calcium channel;Calcium transport;Cell membrane;Complete proteome;Disease mutation;Disulfide bond;Glycoprotein;Ion channel;Ion transport;Long QT syndrome;Membrane;Metal-binding;Phosphoprotein;Polymorphism;Reference proteome;Repeat;Transmembrane;Transmembrane helix;Transport;Voltage-gated channel.;		0.262475	0.536815	0.824053	1	38	34	36	CAC1C
Locus_10136_Transcript_3/5_Confidence_0.636_Length_6524	6524	Locus_10136_Transcript_3/5_Confidence_0.636_Length_6524	6524	Locus_10136_Transcript_3/5_Confidence_0.636_Length_6524	6524	Q13332	85.619	0	PTPRS_HUMAN	Receptor-type tyrosine-protein phosphatase S	hsa:5802	GO:0070062 \\ GO:0005887 \\ GO:0005001 \\ GO:0007155 \\ GO:0021549 \\ GO:0021987 \\ GO:0022038 \\ GO:0090557 \\ GO:0030198 \\ GO:0021766 \\ GO:0021510 \\	cell adhesion (GO:0007155);cerebellum development (GO:0021549);cerebral cortex development (GO:0021987);corpus callosum development (GO:0022038);establishment of endothelial intestinal barrier (GO:0090557);extracellular matrix organization (GO:0030198);hippocampus development (GO:0021766);spinal cord development (GO:0021510);	transmembrane receptor protein tyrosine phosphatase activity (GO:0005001);	extracellular exosome (GO:0070062);integral component of plasma membrane (GO:0005887);	3D-structure;Alternative splicing;Cell adhesion;Complete proteome;Disulfide bond;Glycoprotein;Hydrolase;Immunoglobulin domain;Membrane;Polymorphism;Protein phosphatase;Receptor;Reference proteome;Repeat;Signal;Transmembrane;Transmembrane helix.;		0.188215	4.46163	0.82444	1	592	558	575	PTPRS
Locus_10136_Transcript_4/5_Confidence_0.364_Length_4415	4415	Locus_10136_Transcript_4/5_Confidence_0.364_Length_4415	4415	Locus_10136_Transcript_4/5_Confidence_0.364_Length_4415	4415	Q13332	88.403	0	PTPRS_HUMAN	Receptor-type tyrosine-protein phosphatase S	hsa:5802	GO:0070062 \\ GO:0005887 \\ GO:0005001 \\ GO:0007155 \\ GO:0021549 \\ GO:0021987 \\ GO:0022038 \\ GO:0090557 \\ GO:0030198 \\ GO:0021766 \\ GO:0021510 \\	cell adhesion (GO:0007155);cerebellum development (GO:0021549);cerebral cortex development (GO:0021987);corpus callosum development (GO:0022038);establishment of endothelial intestinal barrier (GO:0090557);extracellular matrix organization (GO:0030198);hippocampus development (GO:0021766);spinal cord development (GO:0021510);	transmembrane receptor protein tyrosine phosphatase activity (GO:0005001);	extracellular exosome (GO:0070062);integral component of plasma membrane (GO:0005887);	3D-structure;Alternative splicing;Cell adhesion;Complete proteome;Disulfide bond;Glycoprotein;Hydrolase;Immunoglobulin domain;Membrane;Polymorphism;Protein phosphatase;Receptor;Reference proteome;Repeat;Signal;Transmembrane;Transmembrane helix.;		0.0706821	4.23701	0.935964	1	487	498	492.5	PTPRS
Locus_10136_Transcript_5/5_Confidence_0.636_Length_6476	6476	Locus_10136_Transcript_5/5_Confidence_0.636_Length_6476	6476	Locus_10136_Transcript_5/5_Confidence_0.636_Length_6476	6476	Q13332	85.011	0	PTPRS_HUMAN	Receptor-type tyrosine-protein phosphatase S	hsa:5802	GO:0070062 \\ GO:0005887 \\ GO:0005001 \\ GO:0007155 \\ GO:0021549 \\ GO:0021987 \\ GO:0022038 \\ GO:0090557 \\ GO:0030198 \\ GO:0021766 \\ GO:0021510 \\	cell adhesion (GO:0007155);cerebellum development (GO:0021549);cerebral cortex development (GO:0021987);corpus callosum development (GO:0022038);establishment of endothelial intestinal barrier (GO:0090557);extracellular matrix organization (GO:0030198);hippocampus development (GO:0021766);spinal cord development (GO:0021510);	transmembrane receptor protein tyrosine phosphatase activity (GO:0005001);	extracellular exosome (GO:0070062);integral component of plasma membrane (GO:0005887);	3D-structure;Alternative splicing;Cell adhesion;Complete proteome;Disulfide bond;Glycoprotein;Hydrolase;Immunoglobulin domain;Membrane;Polymorphism;Protein phosphatase;Receptor;Reference proteome;Repeat;Signal;Transmembrane;Transmembrane helix.;		0.0878768	4.46241	0.919021	1	573	579	576	PTPRS
Locus_10137_Transcript_1/2_Confidence_0.750_Length_2871	2871	Locus_10137_Transcript_1/2_Confidence_0.750_Length_2871	2871	Locus_10137_Transcript_1/2_Confidence_0.750_Length_2871	2871	Q2NL18	69.62	8.16e-72	HEYL_BOVIN	Hairy/enhancer-of-split related with YRPW motif-like protein	bta:538609	GO:0005634 \\ GO:0003677 \\ GO:0007275 \\ GO:0007219 \\ GO:0006355 \\ GO:0006351 \\	multicellular organismal development (GO:0007275);Notch signaling pathway (GO:0007219);regulation of transcription, DNA-templated (GO:0006355);transcription, DNA-templated (GO:0006351);	DNA binding (GO:0003677);	nucleus (GO:0005634);	Alternative splicing;Complete proteome;Developmental protein;DNA-binding;Notch signaling pathway;Nucleus;Reference proteome;Repressor;Transcription;Transcription regulation.;		-0.0234771	3.453	0.98084	1	273	298	285.5	HEYL
Locus_101377_Transcript_1/1_Confidence_1.000_Length_775	775	No_sig_nr_hit	No_sig_nr_hit	No_sig_nr_hit	No_sig_nr_hit	No_Uniprotmatch	No_%_identity	No_evalue	No_ID	No_Description	No_KEGG	No_GO	No_GOCC	No_GOBP	No_GOMF	No_keywords		0.015345	-0.504455	1	1	16	17	16.5	No
Locus_10138_Transcript_1/5_Confidence_0.636_Length_4149	4149	Locus_10138_Transcript_1/5_Confidence_0.636_Length_4149	4149	Locus_10138_Transcript_1/5_Confidence_0.636_Length_4149	4149	Q07890	86.787	0	SOS2_HUMAN	Son of sevenless homolog 2	hsa:6655	GO:0005829 \\ GO:0003677 \\ GO:0005089 \\ GO:0097190 \\ GO:0007411 \\ GO:0001782 \\ GO:0048011 \\ GO:0043065 \\ GO:0051057 \\ GO:2000973 \\ GO:0035023 \\ GO:0051056 \\ GO:0033081 \\ GO:0042129 \\ GO:0007264 \\	apoptotic signaling pathway (GO:0097190);axon guidance (GO:0007411);B cell homeostasis (GO:0001782);neurotrophin TRK receptor signaling pathway (GO:0048011);positive regulation of apoptotic process (GO:0043065);positive regulation of small GTPase mediated signal transduction (GO:0051057);regulation of pro-B cell differentiation (GO:2000973);regulation of Rho protein signal transduction (GO:003502…	DNA binding (GO:0003677);Rho guanyl-nucleotide exchange factor activity (GO:0005089);	cytosol (GO:0005829);	Alternative splicing;Complete proteome;Disease mutation;Guanine-nucleotide releasing factor;Polymorphism;Reference proteome.;		-0.0538228	4.81447	0.949524	1	697	777	737	SOS2
Locus_10138_Transcript_2/5_Confidence_0.182_Length_1407	1407	Locus_10138_Transcript_2/5_Confidence_0.182_Length_1407	1407	Locus_10138_Transcript_2/5_Confidence_0.182_Length_1407	1407	Q07890	90.73	0	SOS2_HUMAN	Son of sevenless homolog 2	hsa:6655	GO:0005829 \\ GO:0003677 \\ GO:0005089 \\ GO:0097190 \\ GO:0007411 \\ GO:0001782 \\ GO:0048011 \\ GO:0043065 \\ GO:0051057 \\ GO:2000973 \\ GO:0035023 \\ GO:0051056 \\ GO:0033081 \\ GO:0042129 \\ GO:0007264 \\	apoptotic signaling pathway (GO:0097190);axon guidance (GO:0007411);B cell homeostasis (GO:0001782);neurotrophin TRK receptor signaling pathway (GO:0048011);positive regulation of apoptotic process (GO:0043065);positive regulation of small GTPase mediated signal transduction (GO:0051057);regulation of pro-B cell differentiation (GO:2000973);regulation of Rho protein signal transduction (GO:003502…	DNA binding (GO:0003677);Rho guanyl-nucleotide exchange factor activity (GO:0005089);	cytosol (GO:0005829);	Alternative splicing;Complete proteome;Disease mutation;Guanine-nucleotide releasing factor;Polymorphism;Reference proteome.;		-0.304939	1.32634	0.754233	1	55	73	64	SOS2
Locus_10138_Transcript_4/5_Confidence_0.364_Length_1191	1191	Locus_10138_Transcript_4/5_Confidence_0.364_Length_1191	1191	Locus_10138_Transcript_4/5_Confidence_0.364_Length_1191	1191	Q07890	77.619	1.84e-28	SOS2_HUMAN	Son of sevenless homolog 2	hsa:6655	GO:0005829 \\ GO:0003677 \\ GO:0005089 \\ GO:0097190 \\ GO:0007411 \\ GO:0001782 \\ GO:0048011 \\ GO:0043065 \\ GO:0051057 \\ GO:2000973 \\ GO:0035023 \\ GO:0051056 \\ GO:0033081 \\ GO:0042129 \\ GO:0007264 \\	apoptotic signaling pathway (GO:0097190);axon guidance (GO:0007411);B cell homeostasis (GO:0001782);neurotrophin TRK receptor signaling pathway (GO:0048011);positive regulation of apoptotic process (GO:0043065);positive regulation of small GTPase mediated signal transduction (GO:0051057);regulation of pro-B cell differentiation (GO:2000973);regulation of Rho protein signal transduction (GO:003502…	DNA binding (GO:0003677);Rho guanyl-nucleotide exchange factor activity (GO:0005089);	cytosol (GO:0005829);	Alternative splicing;Complete proteome;Disease mutation;Guanine-nucleotide releasing factor;Polymorphism;Reference proteome.;		-0.061338	1.27385	0.957184	1	58	65	61.5	SOS2
Locus_101382_Transcript_1/1_Confidence_1.000_Length_318	318	Locus_101382_Transcript_1/1_Confidence_1.000_Length_318	318	Locus_101382_Transcript_1/1_Confidence_1.000_Length_318	318	C5L2P2	30	4.41e-08	C5L2P2_PERM5	Putative uncharacterized protein {ECO:0000313|EMBL:EER08957.1}	No_KEGG	No_GOcodes	No_GOBP	No_GOMF	No_GOCC	Complete proteome {ECO:0000313|Proteomes:UP000007800};Reference proteome {ECO:0000313|Proteomes:UP000007800}.;		0.101768	-1.01298	1	1	11	11	11	C5L2P2
Locus_10139_Transcript_1/3_Confidence_0.556_Length_1437	1437	Locus_10139_Transcript_1/3_Confidence_0.556_Length_1437	1437	Locus_10139_Transcript_1/3_Confidence_0.556_Length_1437	1437	B5X5N3	41.27	1.4e-26	SKA2_SALSA	Spindle and kinetochore-associated protein 2	No_KEGG	GO:0000940 \\ GO:0005737 \\ GO:0005876 \\ GO:0008017 \\ GO:0051301 \\ GO:0007059 \\ GO:0007067 \\ GO:0031110 \\	cell division (GO:0051301);chromosome segregation (GO:0007059);mitotic nuclear division (GO:0007067);regulation of microtubule polymerization or depolymerization (GO:0031110);	microtubule binding (GO:0008017);	condensed chromosome outer kinetochore (GO:0000940);cytoplasm (GO:0005737);spindle microtubule (GO:0005876);	Alternative splicing;Cell cycle;Cell division;Centromere;Chromosome;Cytoplasm;Cytoskeleton;Kinetochore;Microtubule;Mitosis.;		0.234021	2.93359	0.782946	1	207	189	198	SKA2
Locus_10139_Transcript_2/3_Confidence_0.667_Length_2445	2445	Locus_10139_Transcript_2/3_Confidence_0.667_Length_2445	2445	Locus_10139_Transcript_2/3_Confidence_0.667_Length_2445	2445	Q8WVK7	51.485	2.94e-24	SKA2_HUMAN	Spindle and kinetochore-associated protein 2	hsa:348235	GO:0000940 \\ GO:0005829 \\ GO:0005876 \\ GO:0008017 \\ GO:0051301 \\ GO:0007059 \\ GO:0000278 \\ GO:0007067 \\ GO:0031110 \\ GO:0007264 \\	cell division (GO:0051301);chromosome segregation (GO:0007059);mitotic cell cycle (GO:0000278);mitotic nuclear division (GO:0007067);regulation of microtubule polymerization or depolymerization (GO:0031110);small GTPase mediated signal transduction (GO:0007264);	microtubule binding (GO:0008017);	condensed chromosome outer kinetochore (GO:0000940);cytosol (GO:0005829);spindle microtubule (GO:0005876);	3D-structure;Alternative splicing;Cell cycle;Cell division;Centromere;Chromosome;Complete proteome;Cytoplasm;Cytoskeleton;Kinetochore;Microtubule;Mitosis;Phosphoprotein;Reference proteome.;		0.0321698	2.97299	0.979975	1	199	209	204	SKA2
Locus_10139_Transcript_3/3_Confidence_0.778_Length_1258	1258	Locus_10139_Transcript_3/3_Confidence_0.778_Length_1258	1258	Locus_10139_Transcript_3/3_Confidence_0.778_Length_1258	1258	B5X5N3	42.358	2.11e-42	SKA2_SALSA	Spindle and kinetochore-associated protein 2	No_KEGG	GO:0000940 \\ GO:0005737 \\ GO:0005876 \\ GO:0008017 \\ GO:0051301 \\ GO:0007059 \\ GO:0007067 \\ GO:0031110 \\	cell division (GO:0051301);chromosome segregation (GO:0007059);mitotic nuclear division (GO:0007067);regulation of microtubule polymerization or depolymerization (GO:0031110);	microtubule binding (GO:0008017);	condensed chromosome outer kinetochore (GO:0000940);cytoplasm (GO:0005737);spindle microtubule (GO:0005876);	Alternative splicing;Cell cycle;Cell division;Centromere;Chromosome;Cytoplasm;Cytoskeleton;Kinetochore;Microtubule;Mitosis.;		0.31146	2.79871	0.719137	1	193	167	180	SKA2
Locus_1014_Transcript_1/8_Confidence_0.333_Length_1894	1894	Locus_1014_Transcript_1/8_Confidence_0.333_Length_1894	1894	Locus_1014_Transcript_1/8_Confidence_0.333_Length_1894	1894	P67829	99.429	1.43e-94	KC1A_SHEEP	Casein kinase I isoform alpha	No_KEGG	GO:0000777 \\ GO:0005737 \\ GO:0005815 \\ GO:0016607 \\ GO:0005524 \\ GO:0004672 \\ GO:0004674 \\ GO:0051301 \\ GO:0045104 \\ GO:0007067 \\ GO:0006468 \\ GO:0016055 \\	cell division (GO:0051301);intermediate filament cytoskeleton organization (GO:0045104);mitotic nuclear division (GO:0007067);protein phosphorylation (GO:0006468);Wnt signaling pathway (GO:0016055);	ATP binding (GO:0005524);protein kinase activity (GO:0004672);protein serine/threonine kinase activity (GO:0004674);	condensed chromosome kinetochore (GO:0000777);cytoplasm (GO:0005737);microtubule organizing center (GO:0005815);nuclear speck (GO:0016607);	Acetylation;ATP-binding;Cell cycle;Cell division;Centromere;Chromosome;Complete proteome;Cytoplasm;Cytoskeleton;Kinase;Kinetochore;Mitosis;Nucleotide-binding;Nucleus;Reference proteome;Serine/threonine-protein kinase;Transferase;Wnt signaling pathway.;		0.0263845	4.48241	0.976475	1	569	600	584.5	KC1A
Locus_1014_Transcript_2/8_Confidence_0.222_Length_1167	1167	Locus_1014_Transcript_2/8_Confidence_0.222_Length_1167	1167	Locus_1014_Transcript_2/8_Confidence_0.222_Length_1167	1167	P67963	100	6.41e-106	KC1A_XENLA	Casein kinase I isoform alpha	xla:379624	GO:0000777 \\ GO:0005737 \\ GO:0005815 \\ GO:0016607 \\ GO:0005524 \\ GO:0004674 \\ GO:0051301 \\ GO:0045104 \\ GO:0007067 \\ GO:0006468 \\ GO:0016055 \\	cell division (GO:0051301);intermediate filament cytoskeleton organization (GO:0045104);mitotic nuclear division (GO:0007067);protein phosphorylation (GO:0006468);Wnt signaling pathway (GO:0016055);	ATP binding (GO:0005524);protein serine/threonine kinase activity (GO:0004674);	condensed chromosome kinetochore (GO:0000777);cytoplasm (GO:0005737);microtubule organizing center (GO:0005815);nuclear speck (GO:0016607);	ATP-binding;Cell cycle;Cell division;Centromere;Chromosome;Cytoplasm;Cytoskeleton;Kinase;Kinetochore;Mitosis;Nucleotide-binding;Nucleus;Phosphoprotein;Serine/threonine-protein kinase;Transferase;Wnt signaling pathway.;		0.12505	1.34292	0.918265	1	65	64	64.5	KC1A
Locus_1014_Transcript_3/8_Confidence_0.222_Length_1518	1518	Locus_1014_Transcript_3/8_Confidence_0.222_Length_1518	1518	Locus_1014_Transcript_3/8_Confidence_0.222_Length_1518	1518	Q8BK63	99.346	2.37e-104	KC1A_MOUSE	Casein kinase I isoform alpha	No_KEGG	GO:0030877 \\ GO:0005813 \\ GO:0000777 \\ GO:0030529 \\ GO:0045095 \\ GO:0016020 \\ GO:0005847 \\ GO:0016607 \\ GO:0072372 \\ GO:0005524 \\ GO:0004672 \\ GO:0004674 \\ GO:0051301 \\ GO:0000902 \\ GO:0007030 \\ GO:0045104 \\ GO:0007067 \\ GO:0018105 \\ GO:0006909 \\ GO:0032436 \\ GO:0006468 \\ GO:1904424 \\ GO:0016055 \\	cell division (GO:0051301);cell morphogenesis (GO:0000902);Golgi organization (GO:0007030);intermediate filament cytoskeleton organization (GO:0045104);mitotic nuclear division (GO:0007067);peptidyl-serine phosphorylation (GO:0018105);phagocytosis (GO:0006909);positive regulation of proteasomal ubiquitin-dependent protein catabolic process (GO:0032436);protein phosphorylation (GO:0006468);regulat…	ATP binding (GO:0005524);protein kinase activity (GO:0004672);protein serine/threonine kinase activity (GO:0004674);	beta-catenin destruction complex (GO:0030877);centrosome (GO:0005813);condensed chromosome kinetochore (GO:0000777);intracellular ribonucleoprotein complex (GO:0030529);keratin filament (GO:0045095);membrane (GO:0016020);mRNA cleavage and polyadenylation specificity factor complex (GO:0005847);nuclear speck (GO:0016607);primary cilium (GO:0072372);	Acetylation;Alternative splicing;ATP-binding;Cell cycle;Cell division;Centromere;Chromosome;Complete proteome;Cytoplasm;Cytoskeleton;Kinase;Kinetochore;Mitosis;Nucleotide-binding;Nucleus;Reference proteome;Serine/threonine-protein kinase;Transferase;Wnt signaling pathway.;		-0.394869	1.56596	0.657825	1	63	89	76	KC1A
Locus_1014_Transcript_4/8_Confidence_0.333_Length_2275	2275	Locus_1014_Transcript_4/8_Confidence_0.333_Length_2275	2275	Locus_1014_Transcript_4/8_Confidence_0.333_Length_2275	2275	P67963	100	0	KC1A_XENLA	Casein kinase I isoform alpha	xla:379624	GO:0000777 \\ GO:0005737 \\ GO:0005815 \\ GO:0016607 \\ GO:0005524 \\ GO:0004674 \\ GO:0051301 \\ GO:0045104 \\ GO:0007067 \\ GO:0006468 \\ GO:0016055 \\	cell division (GO:0051301);intermediate filament cytoskeleton organization (GO:0045104);mitotic nuclear division (GO:0007067);protein phosphorylation (GO:0006468);Wnt signaling pathway (GO:0016055);	ATP binding (GO:0005524);protein serine/threonine kinase activity (GO:0004674);	condensed chromosome kinetochore (GO:0000777);cytoplasm (GO:0005737);microtubule organizing center (GO:0005815);nuclear speck (GO:0016607);	ATP-binding;Cell cycle;Cell division;Centromere;Chromosome;Cytoplasm;Cytoskeleton;Kinase;Kinetochore;Mitosis;Nucleotide-binding;Nucleus;Phosphoprotein;Serine/threonine-protein kinase;Transferase;Wnt signaling pathway.;		0.109124	3.14884	0.905499	1	231	230	230.5	KC1A
Locus_1014_Transcript_5/8_Confidence_0.167_Length_2137	2137	Locus_1014_Transcript_5/8_Confidence_0.167_Length_2137	2137	Locus_1014_Transcript_5/8_Confidence_0.167_Length_2137	2137	Q8WXF2	65.766	7.66e-32	Q8WXF2_HUMAN	HLCDGP1 {ECO:0000313|EMBL:AAL60204.1}	No_KEGG	No_GOcodes	No_GOBP	No_GOMF	No_GOCC	No_keywords		0.0679099	4.11844	0.939493	1	448	459	453.5	Q8WXF2
Locus_1014_Transcript_6/8_Confidence_0.444_Length_2623	2623	Locus_1014_Transcript_6/8_Confidence_0.444_Length_2623	2623	Locus_1014_Transcript_6/8_Confidence_0.444_Length_2623	2623	P67829	92.068	0	KC1A_SHEEP	Casein kinase I isoform alpha	No_KEGG	GO:0000777 \\ GO:0005737 \\ GO:0005815 \\ GO:0016607 \\ GO:0005524 \\ GO:0004672 \\ GO:0004674 \\ GO:0051301 \\ GO:0045104 \\ GO:0007067 \\ GO:0006468 \\ GO:0016055 \\	cell division (GO:0051301);intermediate filament cytoskeleton organization (GO:0045104);mitotic nuclear division (GO:0007067);protein phosphorylation (GO:0006468);Wnt signaling pathway (GO:0016055);	ATP binding (GO:0005524);protein kinase activity (GO:0004672);protein serine/threonine kinase activity (GO:0004674);	condensed chromosome kinetochore (GO:0000777);cytoplasm (GO:0005737);microtubule organizing center (GO:0005815);nuclear speck (GO:0016607);	Acetylation;ATP-binding;Cell cycle;Cell division;Centromere;Chromosome;Complete proteome;Cytoplasm;Cytoskeleton;Kinase;Kinetochore;Mitosis;Nucleotide-binding;Nucleus;Reference proteome;Serine/threonine-protein kinase;Transferase;Wnt signaling pathway.;		0.14642	4.66571	0.8637	1	673	653	663	KC1A
Locus_1014_Transcript_7/8_Confidence_0.389_Length_2575	2575	Locus_1014_Transcript_7/8_Confidence_0.389_Length_2575	2575	Locus_1014_Transcript_7/8_Confidence_0.389_Length_2575	2575	P67963	100	0	KC1A_XENLA	Casein kinase I isoform alpha	xla:379624	GO:0000777 \\ GO:0005737 \\ GO:0005815 \\ GO:0016607 \\ GO:0005524 \\ GO:0004674 \\ GO:0051301 \\ GO:0045104 \\ GO:0007067 \\ GO:0006468 \\ GO:0016055 \\	cell division (GO:0051301);intermediate filament cytoskeleton organization (GO:0045104);mitotic nuclear division (GO:0007067);protein phosphorylation (GO:0006468);Wnt signaling pathway (GO:0016055);	ATP binding (GO:0005524);protein serine/threonine kinase activity (GO:0004674);	condensed chromosome kinetochore (GO:0000777);cytoplasm (GO:0005737);microtubule organizing center (GO:0005815);nuclear speck (GO:0016607);	ATP-binding;Cell cycle;Cell division;Centromere;Chromosome;Cytoplasm;Cytoskeleton;Kinase;Kinetochore;Mitosis;Nucleotide-binding;Nucleus;Phosphoprotein;Serine/threonine-protein kinase;Transferase;Wnt signaling pathway.;		0.0738436	4.83125	0.931695	1	737	752	744.5	KC1A
Locus_1014_Transcript_8/8_Confidence_0.389_Length_2539	2539	Locus_1014_Transcript_8/8_Confidence_0.389_Length_2539	2539	Locus_1014_Transcript_8/8_Confidence_0.389_Length_2539	2539	P67829	100	0	KC1A_SHEEP	Casein kinase I isoform alpha	No_KEGG	GO:0000777 \\ GO:0005737 \\ GO:0005815 \\ GO:0016607 \\ GO:0005524 \\ GO:0004672 \\ GO:0004674 \\ GO:0051301 \\ GO:0045104 \\ GO:0007067 \\ GO:0006468 \\ GO:0016055 \\	cell division (GO:0051301);intermediate filament cytoskeleton organization (GO:0045104);mitotic nuclear division (GO:0007067);protein phosphorylation (GO:0006468);Wnt signaling pathway (GO:0016055);	ATP binding (GO:0005524);protein kinase activity (GO:0004672);protein serine/threonine kinase activity (GO:0004674);	condensed chromosome kinetochore (GO:0000777);cytoplasm (GO:0005737);microtubule organizing center (GO:0005815);nuclear speck (GO:0016607);	Acetylation;ATP-binding;Cell cycle;Cell division;Centromere;Chromosome;Complete proteome;Cytoplasm;Cytoskeleton;Kinase;Kinetochore;Mitosis;Nucleotide-binding;Nucleus;Reference proteome;Serine/threonine-protein kinase;Transferase;Wnt signaling pathway.;		-0.0743021	4.63784	0.930327	1	612	692	652	KC1A
Locus_10140_Transcript_1/1_Confidence_1.000_Length_550	550	No_sig_nr_hit	No_sig_nr_hit	No_sig_nr_hit	No_sig_nr_hit	No_Uniprotmatch	No_%_identity	No_evalue	No_ID	No_Description	No_KEGG	No_GO	No_GOCC	No_GOBP	No_GOMF	No_keywords		0.0435007	2.235	0.977808	1	119	124	121.5	No
Locus_10141_Transcript_1/1_Confidence_1.000_Length_1545	1545	No_sig_nr_hit	No_sig_nr_hit	No_sig_nr_hit	No_sig_nr_hit	No_Uniprotmatch	No_%_identity	No_evalue	No_ID	No_Description	No_KEGG	No_GO	No_GOCC	No_GOBP	No_GOMF	No_keywords		0.169055	-0.157939	0.88719	1	22	21	21.5	No
Locus_10142_Transcript_3/3_Confidence_0.667_Length_2194	2194	Locus_10142_Transcript_3/3_Confidence_0.667_Length_2194	2194	Locus_10142_Transcript_3/3_Confidence_0.667_Length_2194	2194	Q7L9B9	79.218	0	EEPD1_HUMAN	Endonuclease/exonuclease/phosphatase family domain-containing protein 1	hsa:80820	GO:0003677 \\ GO:0006281 \\	DNA repair (GO:0006281);	DNA binding (GO:0003677);	No_GOCC	Complete proteome;Lipoprotein;Myristate;Phosphoprotein;Polymorphism;Reference proteome.;		-0.0764647	4.15812	0.929423	1	438	496	467	EEPD1
Locus_10144_Transcript_1/2_Confidence_0.800_Length_2543	2543	No_sig_nr_hit	No_sig_nr_hit	No_sig_nr_hit	No_sig_nr_hit	No_Uniprotmatch	No_%_identity	No_evalue	No_ID	No_Description	No_KEGG	No_GO	No_GOCC	No_GOBP	No_GOMF	No_keywords		0.00886925	5.71971	0.992513	1	1336	1426	1381	No
Locus_101444_Transcript_1/1_Confidence_1.000_Length_1645	1645	No_sig_nr_hit	No_sig_nr_hit	No_sig_nr_hit	No_sig_nr_hit	No_Uniprotmatch	No_%_identity	No_evalue	No_ID	No_Description	No_KEGG	No_GO	No_GOCC	No_GOBP	No_GOMF	No_keywords		-0.38089	0.282081	0.712306	1	25	35	30	No
Locus_10145_Transcript_3/7_Confidence_0.176_Length_688	688	Locus_10145_Transcript_3/7_Confidence_0.176_Length_688	688	Locus_10145_Transcript_3/7_Confidence_0.176_Length_688	688	Q5ZJ41	92.414	5.04e-92	MARH5_CHICK	E3 ubiquitin-protein ligase MARCH5	gga:423815	GO:0005783 \\ GO:0005789 \\ GO:0016021 \\ GO:0005741 \\ GO:0016874 \\ GO:0004842 \\ GO:0008270 \\ GO:0090344 \\ GO:0090141 \\ GO:0051865 \\ GO:0070585 \\ GO:0000209 \\ GO:0090140 \\	negative regulation of cell aging (GO:0090344);positive regulation of mitochondrial fission (GO:0090141);protein autoubiquitination (GO:0051865);protein localization to mitochondrion (GO:0070585);protein polyubiquitination (GO:0000209);regulation of mitochondrial fission (GO:0090140);	ligase activity (GO:0016874);ubiquitin-protein transferase activity (GO:0004842);zinc ion binding (GO:0008270);	endoplasmic reticulum (GO:0005783);endoplasmic reticulum membrane (GO:0005789);integral component of membrane (GO:0016021);mitochondrial outer membrane (GO:0005741);	Complete proteome;Endoplasmic reticulum;Ligase;Membrane;Metal-binding;Mitochondrion;Mitochondrion outer membrane;Reference proteome;Transmembrane;Transmembrane helix;Ubl conjugation pathway;Zinc;Zinc-finger.;		-0.460773	0.325611	0.644899	1	25	37	31	MARH5
Locus_10145_Transcript_5/7_Confidence_0.647_Length_3437	3437	Locus_10145_Transcript_5/7_Confidence_0.647_Length_3437	3437	Locus_10145_Transcript_5/7_Confidence_0.647_Length_3437	3437	Q5ZJ41	99.644	0	MARH5_CHICK	E3 ubiquitin-protein ligase MARCH5	gga:423815	GO:0005783 \\ GO:0005789 \\ GO:0016021 \\ GO:0005741 \\ GO:0016874 \\ GO:0004842 \\ GO:0008270 \\ GO:0090344 \\ GO:0090141 \\ GO:0051865 \\ GO:0070585 \\ GO:0000209 \\ GO:0090140 \\	negative regulation of cell aging (GO:0090344);positive regulation of mitochondrial fission (GO:0090141);protein autoubiquitination (GO:0051865);protein localization to mitochondrion (GO:0070585);protein polyubiquitination (GO:0000209);regulation of mitochondrial fission (GO:0090140);	ligase activity (GO:0016874);ubiquitin-protein transferase activity (GO:0004842);zinc ion binding (GO:0008270);	endoplasmic reticulum (GO:0005783);endoplasmic reticulum membrane (GO:0005789);integral component of membrane (GO:0016021);mitochondrial outer membrane (GO:0005741);	Complete proteome;Endoplasmic reticulum;Ligase;Membrane;Metal-binding;Mitochondrion;Mitochondrion outer membrane;Reference proteome;Transmembrane;Transmembrane helix;Ubl conjugation pathway;Zinc;Zinc-finger.;		0.0939449	4.62298	0.912557	1	642	646	644	MARH5
Locus_10145_Transcript_6/7_Confidence_0.471_Length_3294	3294	Locus_10145_Transcript_6/7_Confidence_0.471_Length_3294	3294	Locus_10145_Transcript_6/7_Confidence_0.471_Length_3294	3294	Q5ZJ41	98.734	3.53e-100	MARH5_CHICK	E3 ubiquitin-protein ligase MARCH5	gga:423815	GO:0005783 \\ GO:0005789 \\ GO:0016021 \\ GO:0005741 \\ GO:0016874 \\ GO:0004842 \\ GO:0008270 \\ GO:0090344 \\ GO:0090141 \\ GO:0051865 \\ GO:0070585 \\ GO:0000209 \\ GO:0090140 \\	negative regulation of cell aging (GO:0090344);positive regulation of mitochondrial fission (GO:0090141);protein autoubiquitination (GO:0051865);protein localization to mitochondrion (GO:0070585);protein polyubiquitination (GO:0000209);regulation of mitochondrial fission (GO:0090140);	ligase activity (GO:0016874);ubiquitin-protein transferase activity (GO:0004842);zinc ion binding (GO:0008270);	endoplasmic reticulum (GO:0005783);endoplasmic reticulum membrane (GO:0005789);integral component of membrane (GO:0016021);mitochondrial outer membrane (GO:0005741);	Complete proteome;Endoplasmic reticulum;Ligase;Membrane;Metal-binding;Mitochondrion;Mitochondrion outer membrane;Reference proteome;Transmembrane;Transmembrane helix;Ubl conjugation pathway;Zinc;Zinc-finger.;		0.199881	4.39923	0.812091	1	569	532	550.5	MARH5
Locus_10148_Transcript_1/10_Confidence_0.400_Length_2649	2649	Locus_10148_Transcript_1/10_Confidence_0.400_Length_2649	2649	Locus_10148_Transcript_1/10_Confidence_0.400_Length_2649	2649	Q01888	86.486	4.27e-59	GDC_BOVIN	Graves disease carrier protein	bta:282524	GO:0016021 \\ GO:0005743 \\ GO:0003735 \\ GO:0006412 \\ GO:0055085 \\	translation (GO:0006412);transmembrane transport (GO:0055085);	structural constituent of ribosome (GO:0003735);	integral component of membrane (GO:0016021);mitochondrial inner membrane (GO:0005743);	Complete proteome;Membrane;Mitochondrion;Mitochondrion inner membrane;Reference proteome;Repeat;Transmembrane;Transmembrane helix;Transport.;		0.102547	0.457013	0.962648	1	34	34	34	GDC
Locus_10148_Transcript_10/10_Confidence_0.600_Length_3001	3001	Locus_10148_Transcript_10/10_Confidence_0.600_Length_3001	3001	Locus_10148_Transcript_10/10_Confidence_0.600_Length_3001	3001	Q01888	85.714	0	GDC_BOVIN	Graves disease carrier protein	bta:282524	GO:0016021 \\ GO:0005743 \\ GO:0003735 \\ GO:0006412 \\ GO:0055085 \\	translation (GO:0006412);transmembrane transport (GO:0055085);	structural constituent of ribosome (GO:0003735);	integral component of membrane (GO:0016021);mitochondrial inner membrane (GO:0005743);	Complete proteome;Membrane;Mitochondrion;Mitochondrion inner membrane;Reference proteome;Repeat;Transmembrane;Transmembrane helix;Transport.;		-0.660483	0.687898	0.489143	1	30	51	40.5	GDC
Locus_10148_Transcript_2/10_Confidence_0.400_Length_2879	2879	Locus_10148_Transcript_2/10_Confidence_0.400_Length_2879	2879	Locus_10148_Transcript_2/10_Confidence_0.400_Length_2879	2879	Q01888	83.553	2.02e-128	GDC_BOVIN	Graves disease carrier protein	bta:282524	GO:0016021 \\ GO:0005743 \\ GO:0003735 \\ GO:0006412 \\ GO:0055085 \\	translation (GO:0006412);transmembrane transport (GO:0055085);	structural constituent of ribosome (GO:0003735);	integral component of membrane (GO:0016021);mitochondrial inner membrane (GO:0005743);	Complete proteome;Membrane;Mitochondrion;Mitochondrion inner membrane;Reference proteome;Repeat;Transmembrane;Transmembrane helix;Transport.;		-0.0312861	0.777457	1	1	41	45	43	GDC
Locus_10148_Transcript_3/10_Confidence_0.567_Length_2838	2838	Locus_10148_Transcript_3/10_Confidence_0.567_Length_2838	2838	Locus_10148_Transcript_3/10_Confidence_0.567_Length_2838	2838	Q01888	85.795	1.78e-100	GDC_BOVIN	Graves disease carrier protein	bta:282524	GO:0016021 \\ GO:0005743 \\ GO:0003735 \\ GO:0006412 \\ GO:0055085 \\	translation (GO:0006412);transmembrane transport (GO:0055085);	structural constituent of ribosome (GO:0003735);	integral component of membrane (GO:0016021);mitochondrial inner membrane (GO:0005743);	Complete proteome;Membrane;Mitochondrion;Mitochondrion inner membrane;Reference proteome;Repeat;Transmembrane;Transmembrane helix;Transport.;		0.615183	0.462525	0.539456	1	40	28	34	GDC
Locus_10148_Transcript_5/10_Confidence_0.200_Length_2701	2701	Locus_10148_Transcript_5/10_Confidence_0.200_Length_2701	2701	Locus_10148_Transcript_5/10_Confidence_0.200_Length_2701	2701	Q8C0K5	85.714	7.06e-63	GDC_MOUSE	Graves disease carrier protein homolog	mmu:73132	GO:0016021 \\ GO:0005743 \\ GO:0005739 \\ GO:0003735 \\ GO:0006412 \\ GO:0055085 \\	translation (GO:0006412);transmembrane transport (GO:0055085);	structural constituent of ribosome (GO:0003735);	integral component of membrane (GO:0016021);mitochondrial inner membrane (GO:0005743);mitochondrion (GO:0005739);	Alternative splicing;Complete proteome;Membrane;Mitochondrion;Mitochondrion inner membrane;Reference proteome;Repeat;Transmembrane;Transmembrane helix;Transport.;		0.0631794	0.553465	1	1	36	37	36.5	GDC
Locus_10148_Transcript_6/10_Confidence_0.533_Length_2499	2499	Locus_10148_Transcript_6/10_Confidence_0.533_Length_2499	2499	Locus_10148_Transcript_6/10_Confidence_0.533_Length_2499	2499	Q01888	86.344	1.33e-136	GDC_BOVIN	Graves disease carrier protein	bta:282524	GO:0016021 \\ GO:0005743 \\ GO:0003735 \\ GO:0006412 \\ GO:0055085 \\	translation (GO:0006412);transmembrane transport (GO:0055085);	structural constituent of ribosome (GO:0003735);	integral component of membrane (GO:0016021);mitochondrial inner membrane (GO:0005743);	Complete proteome;Membrane;Mitochondrion;Mitochondrion inner membrane;Reference proteome;Repeat;Transmembrane;Transmembrane helix;Transport.;		-1.05948	-0.296203	0.292653	1	12	27	19.5	GDC
Locus_10148_Transcript_7/10_Confidence_0.067_Length_2781	2781	Locus_10148_Transcript_7/10_Confidence_0.067_Length_2781	2781	Locus_10148_Transcript_7/10_Confidence_0.067_Length_2781	2781	Q8C0K5	88.235	6.15e-21	GDC_MOUSE	Graves disease carrier protein homolog	mmu:73132	GO:0016021 \\ GO:0005743 \\ GO:0005739 \\ GO:0003735 \\ GO:0006412 \\ GO:0055085 \\	translation (GO:0006412);transmembrane transport (GO:0055085);	structural constituent of ribosome (GO:0003735);	integral component of membrane (GO:0016021);mitochondrial inner membrane (GO:0005743);mitochondrion (GO:0005739);	Alternative splicing;Complete proteome;Membrane;Mitochondrion;Mitochondrion inner membrane;Reference proteome;Repeat;Transmembrane;Transmembrane helix;Transport.;		0.324272	0.647229	0.743843	1	42	36	39	GDC
Locus_10148_Transcript_8/10_Confidence_0.600_Length_3507	3507	Locus_10148_Transcript_8/10_Confidence_0.600_Length_3507	3507	Locus_10148_Transcript_8/10_Confidence_0.600_Length_3507	3507	Q01888	87.333	1.77e-83	GDC_BOVIN	Graves disease carrier protein	bta:282524	GO:0016021 \\ GO:0005743 \\ GO:0003735 \\ GO:0006412 \\ GO:0055085 \\	translation (GO:0006412);transmembrane transport (GO:0055085);	structural constituent of ribosome (GO:0003735);	integral component of membrane (GO:0016021);mitochondrial inner membrane (GO:0005743);	Complete proteome;Membrane;Mitochondrion;Mitochondrion inner membrane;Reference proteome;Repeat;Transmembrane;Transmembrane helix;Transport.;		-0.0932464	1.02627	0.949332	1	48	55	51.5	GDC
Locus_10148_Transcript_9/10_Confidence_0.667_Length_3873	3873	Locus_10148_Transcript_9/10_Confidence_0.667_Length_3873	3873	Locus_10148_Transcript_9/10_Confidence_0.667_Length_3873	3873	Q01888	86.344	2.11e-132	GDC_BOVIN	Graves disease carrier protein	bta:282524	GO:0016021 \\ GO:0005743 \\ GO:0003735 \\ GO:0006412 \\ GO:0055085 \\	translation (GO:0006412);transmembrane transport (GO:0055085);	structural constituent of ribosome (GO:0003735);	integral component of membrane (GO:0016021);mitochondrial inner membrane (GO:0005743);	Complete proteome;Membrane;Mitochondrion;Mitochondrion inner membrane;Reference proteome;Repeat;Transmembrane;Transmembrane helix;Transport.;		0.189907	0.974824	0.843004	1	51	48	49.5	GDC
Locus_10149_Transcript_1/1_Confidence_1.000_Length_3730	3730	Locus_10149_Transcript_1/1_Confidence_1.000_Length_3730	3730	Locus_10149_Transcript_1/1_Confidence_1.000_Length_3730	3730	O43639	92.632	0	NCK2_HUMAN	Cytoplasmic protein NCK2	hsa:8440	GO:0005737 \\ GO:0005829 \\ GO:0005783 \\ GO:0097481 \\ GO:0005802 \\ GO:0012506 \\ GO:0005086 \\ GO:0008093 \\ GO:0030159 \\ GO:0005070 \\ GO:0007015 \\ GO:0007411 \\ GO:0016477 \\ GO:0060996 \\ GO:0048013 \\ GO:0007173 \\ GO:0001771 \\ GO:0030032 \\ GO:0008285 \\ GO:1903912 \\ GO:0033137 \\ GO:1903898 \\ GO:1990441 \\ GO:0030838 \\ GO:1902237 \\ GO:0043547 \\ GO:0042102 \\ GO:0045944 \\ GO:0036…	actin filament organization (GO:0007015);axon guidance (GO:0007411);cell migration (GO:0016477);dendritic spine development (GO:0060996);ephrin receptor signaling pathway (GO:0048013);epidermal growth factor receptor signaling pathway (GO:0007173);immunological synapse formation (GO:0001771);lamellipodium assembly (GO:0030032);negative regulation of cell proliferation (GO:0008285);negative regula…	ARF guanyl-nucleotide exchange factor activity (GO:0005086);cytoskeletal adaptor activity (GO:0008093);receptor signaling complex scaffold activity (GO:0030159);SH3/SH2 adaptor activity (GO:0005070);	cytoplasm (GO:0005737);cytosol (GO:0005829);endoplasmic reticulum (GO:0005783);neuronal postsynaptic density (GO:0097481);trans-Golgi network (GO:0005802);vesicle membrane (GO:0012506);	3D-structure;Acetylation;Complete proteome;Cytoplasm;Endoplasmic reticulum;Phosphoprotein;Reference proteome;Repeat;SH2 domain;SH3 domain;Translation regulation.;		-0.197756	3.68781	0.817938	1	302	372	337	NCK2
Locus_1015_Transcript_1/1_Confidence_1.000_Length_2247	2247	Locus_1015_Transcript_1/1_Confidence_1.000_Length_2247	2247	Locus_1015_Transcript_1/1_Confidence_1.000_Length_2247	2247	C9J7I0	61.165	1.42e-31	UMAD1_HUMAN	UBAP1-MVB12-associated (UMA)-domain containing protein 1 {ECO:0000312|HGNC:HGNC:48955}	No_KEGG	No_GOcodes	No_GOBP	No_GOMF	No_GOCC	Complete proteome;Reference proteome.;		0.137865	4.24543	0.872924	1	501	489	495	UMAD1
Locus_10150_Transcript_1/1_Confidence_1.000_Length_1674	1674	No_sig_nr_hit	No_sig_nr_hit	No_sig_nr_hit	No_sig_nr_hit	No_Uniprotmatch	No_%_identity	No_evalue	No_ID	No_Description	No_KEGG	No_GO	No_GOCC	No_GOBP	No_GOMF	No_keywords		-0.176469	0.328527	0.878393	1	28	34	31	No
Locus_10152_Transcript_2/3_Confidence_0.667_Length_1177	1177	No_sig_nr_hit	No_sig_nr_hit	No_sig_nr_hit	No_sig_nr_hit	No_Uniprotmatch	No_%_identity	No_evalue	No_ID	No_Description	No_KEGG	No_GO	No_GOCC	No_GOBP	No_GOMF	No_keywords		-0.425127	-0.132826	0.727658	1	18	26	22	No
Locus_10152_Transcript_3/3_Confidence_0.667_Length_614	614	No_sig_nr_hit	No_sig_nr_hit	No_sig_nr_hit	No_sig_nr_hit	No_Uniprotmatch	No_%_identity	No_evalue	No_ID	No_Description	No_KEGG	No_GO	No_GOCC	No_GOBP	No_GOMF	No_keywords		0.475379	0.335324	0.644899	1	35	27	31	No
Locus_101521_Transcript_1/1_Confidence_1.000_Length_289	289	No_sig_nr_hit	No_sig_nr_hit	No_sig_nr_hit	No_sig_nr_hit	No_Uniprotmatch	No_%_identity	No_evalue	No_ID	No_Description	No_KEGG	No_GO	No_GOCC	No_GOBP	No_GOMF	No_keywords		-0.242555	-0.857618	0.820975	1	11	14	12.5	No
Locus_10153_Transcript_1/1_Confidence_1.000_Length_802	802	No_sig_nr_hit	No_sig_nr_hit	No_sig_nr_hit	No_sig_nr_hit	No_Uniprotmatch	No_%_identity	No_evalue	No_ID	No_Description	No_KEGG	No_GO	No_GOCC	No_GOBP	No_GOMF	No_keywords		-0.0377529	3.05023	0.968312	1	205	226	215.5	No
Locus_10154_Transcript_1/1_Confidence_1.000_Length_412	412	No_sig_nr_hit	No_sig_nr_hit	No_sig_nr_hit	No_sig_nr_hit	No_Uniprotmatch	No_%_identity	No_evalue	No_ID	No_Description	No_KEGG	No_GO	No_GOCC	No_GOBP	No_GOMF	No_keywords		-0.555418	-0.588789	0.626072	1	12	19	15.5	No
Locus_101541_Transcript_1/1_Confidence_1.000_Length_298	298	No_sig_nr_hit	No_sig_nr_hit	No_sig_nr_hit	No_sig_nr_hit	No_Uniprotmatch	No_%_identity	No_evalue	No_ID	No_Description	No_KEGG	No_GO	No_GOCC	No_GOBP	No_GOMF	No_keywords		0.545051	-0.803513	0.670389	1	15	11	13	No
Locus_10155_Transcript_5/7_Confidence_0.667_Length_6508	6508	Locus_10155_Transcript_5/7_Confidence_0.667_Length_6508	6508	Locus_10155_Transcript_5/7_Confidence_0.667_Length_6508	6508	Q8TF72	77.888	1.69e-130	SHRM3_HUMAN	Protein Shroom3	hsa:57619	GO:0005912 \\ GO:0043296 \\ GO:0016324 \\ GO:0005737 \\ GO:0005856 \\ GO:0005874 \\ GO:0030036 \\ GO:0045176 \\ GO:0000902 \\ GO:0043482 \\ GO:0002066 \\ GO:0001843 \\ GO:0007389 \\ GO:0008360 \\	actin cytoskeleton organization (GO:0030036);apical protein localization (GO:0045176);cell morphogenesis (GO:0000902);cellular pigment accumulation (GO:0043482);columnar/cuboidal epithelial cell development (GO:0002066);neural tube closure (GO:0001843);pattern specification process (GO:0007389);regulation of cell shape (GO:0008360);	No_GOMF	adherens junction (GO:0005912);apical junction complex (GO:0043296);apical plasma membrane (GO:0016324);cytoplasm (GO:0005737);cytoskeleton (GO:0005856);microtubule (GO:0005874);	Actin-binding;Alternative splicing;Cell junction;Cell shape;Complete proteome;Cytoplasm;Cytoskeleton;Developmental protein;Microtubule;Phosphoprotein;Polymorphism;Reference proteome.;		-0.195514	2.10962	0.832175	1	100	123	111.5	SHRM3
Locus_10156_Transcript_1/3_Confidence_0.714_Length_3274	3274	Locus_10156_Transcript_1/3_Confidence_0.714_Length_3274	3274	Locus_10156_Transcript_1/3_Confidence_0.714_Length_3274	3274	Q8IW50	96.364	1.82e-72	F219A_HUMAN	Protein FAM219A	hsa:203259	No_GOcodes	No_GOBP	No_GOMF	No_GOCC	Acetylation;Alternative splicing;Complete proteome;Phosphoprotein;Reference proteome.;		0.082018	1.44696	0.943273	1	69	70	69.5	F219A
Locus_101561_Transcript_1/1_Confidence_1.000_Length_238	238	No_sig_nr_hit	No_sig_nr_hit	No_sig_nr_hit	No_sig_nr_hit	No_Uniprotmatch	No_%_identity	No_evalue	No_ID	No_Description	No_KEGG	No_GO	No_GOCC	No_GOBP	No_GOMF	No_keywords		-0.081284	0.899695	0.972372	1	44	50	47	No
Locus_10157_Transcript_1/2_Confidence_0.750_Length_2773	2773	No_sig_nr_hit	No_sig_nr_hit	No_sig_nr_hit	No_sig_nr_hit	No_Uniprotmatch	No_%_identity	No_evalue	No_ID	No_Description	No_KEGG	No_GO	No_GOCC	No_GOBP	No_GOMF	No_keywords		-0.31724	3.19072	0.712047	1	204	273	238.5	No
Locus_10158_Transcript_1/2_Confidence_0.750_Length_1999	1999	Locus_10158_Transcript_1/2_Confidence_0.750_Length_1999	1999	Locus_10158_Transcript_1/2_Confidence_0.750_Length_1999	1999	Q03413	78.707	0	MEF2D_XENLA	Myocyte-specific enhancer factor 2D homolog	xla:399340	GO:0005634 \\ GO:0003677 \\ GO:0006355 \\ GO:0006351 \\	regulation of transcription, DNA-templated (GO:0006355);transcription, DNA-templated (GO:0006351);	DNA binding (GO:0003677);	nucleus (GO:0005634);	Activator;DNA-binding;Nucleus;Transcription;Transcription regulation.;		0.221017	2.24351	0.803612	1	127	117	122	MEF2D
Locus_10158_Transcript_2/2_Confidence_0.750_Length_1978	1978	Locus_10158_Transcript_2/2_Confidence_0.750_Length_1978	1978	Locus_10158_Transcript_2/2_Confidence_0.750_Length_1978	1978	Q03413	78.286	0	MEF2D_XENLA	Myocyte-specific enhancer factor 2D homolog	xla:399340	GO:0005634 \\ GO:0003677 \\ GO:0006355 \\ GO:0006351 \\	regulation of transcription, DNA-templated (GO:0006355);transcription, DNA-templated (GO:0006351);	DNA binding (GO:0003677);	nucleus (GO:0005634);	Activator;DNA-binding;Nucleus;Transcription;Transcription regulation.;		0.0484192	2.04158	0.961989	1	104	108	106	MEF2D
Locus_10159_Transcript_1/7_Confidence_0.474_Length_2976	2976	Locus_10159_Transcript_1/7_Confidence_0.474_Length_2976	2976	Locus_10159_Transcript_1/7_Confidence_0.474_Length_2976	2976	O70258	92.222	0	SGCE_MOUSE	Epsilon-sarcoglycan	mmu:20392	GO:0005856 \\ GO:0030425 \\ GO:0032590 \\ GO:0016010 \\ GO:0005794 \\ GO:0005887 \\ GO:0005886 \\ GO:0016012 \\ GO:0042383 \\	No_GOBP	No_GOMF	cytoskeleton (GO:0005856);dendrite (GO:0030425);dendrite membrane (GO:0032590);dystrophin-associated glycoprotein complex (GO:0016010);Golgi apparatus (GO:0005794);integral component of plasma membrane (GO:0005887);plasma membrane (GO:0005886);sarcoglycan complex (GO:0016012);sarcolemma (GO:0042383);	Alternative splicing;Cell membrane;Cell projection;Complete proteome;Cytoplasm;Cytoskeleton;Glycoprotein;Golgi apparatus;Membrane;Reference proteome;Transmembrane;Transmembrane helix;Ubl conjugation.;		0.809776	0.248274	0.4097	1	36	22	29	SGCE
Locus_10159_Transcript_2/7_Confidence_0.316_Length_2938	2938	Locus_10159_Transcript_2/7_Confidence_0.316_Length_2938	2938	Locus_10159_Transcript_2/7_Confidence_0.316_Length_2938	2938	O43556	95.918	0	SGCE_HUMAN	Epsilon-sarcoglycan	hsa:8910	GO:0005856 \\ GO:0030425 \\ GO:0032590 \\ GO:0016010 \\ GO:0005794 \\ GO:0005887 \\ GO:0005886 \\ GO:0016012 \\ GO:0042383 \\ GO:0007160 \\ GO:0007517 \\	cell-matrix adhesion (GO:0007160);muscle organ development (GO:0007517);	No_GOMF	cytoskeleton (GO:0005856);dendrite (GO:0030425);dendrite membrane (GO:0032590);dystrophin-associated glycoprotein complex (GO:0016010);Golgi apparatus (GO:0005794);integral component of plasma membrane (GO:0005887);plasma membrane (GO:0005886);sarcoglycan complex (GO:0016012);sarcolemma (GO:0042383);	Alternative splicing;Cell membrane;Cell projection;Complete proteome;Cytoplasm;Cytoskeleton;Disease mutation;Dystonia;Glycoprotein;Golgi apparatus;Membrane;Reference proteome;Transmembrane;Transmembrane helix;Ubl conjugation.;		-0.780971	0.209078	0.435047	1	20	37	28.5	SGCE
Locus_10159_Transcript_4/7_Confidence_0.421_Length_4199	4199	Locus_10159_Transcript_4/7_Confidence_0.421_Length_4199	4199	Locus_10159_Transcript_4/7_Confidence_0.421_Length_4199	4199	Q4R5B1	95.918	0	SGCE_MACFA	Epsilon-sarcoglycan {ECO:0000250|UniProtKB:O43556}	No_KEGG	GO:0005856 \\ GO:0030425 \\ GO:0032590 \\ GO:0005794 \\ GO:0016021 \\ GO:0005886 \\ GO:0016012 \\ GO:0042383 \\	No_GOBP	No_GOMF	cytoskeleton (GO:0005856);dendrite (GO:0030425);dendrite membrane (GO:0032590);Golgi apparatus (GO:0005794);integral component of membrane (GO:0016021);plasma membrane (GO:0005886);sarcoglycan complex (GO:0016012);sarcolemma (GO:0042383);	Cell membrane;Cell projection;Cytoplasm;Cytoskeleton;Glycoprotein;Golgi apparatus;Membrane;Transmembrane;Transmembrane helix;Ubl conjugation.;		0.197538	0.85821	0.830208	1	47	44	45.5	SGCE
Locus_10159_Transcript_5/7_Confidence_0.579_Length_4243	4243	Locus_10159_Transcript_5/7_Confidence_0.579_Length_4243	4243	Locus_10159_Transcript_5/7_Confidence_0.579_Length_4243	4243	O70258	92.798	0	SGCE_MOUSE	Epsilon-sarcoglycan	mmu:20392	GO:0005856 \\ GO:0030425 \\ GO:0032590 \\ GO:0016010 \\ GO:0005794 \\ GO:0005887 \\ GO:0005886 \\ GO:0016012 \\ GO:0042383 \\	No_GOBP	No_GOMF	cytoskeleton (GO:0005856);dendrite (GO:0030425);dendrite membrane (GO:0032590);dystrophin-associated glycoprotein complex (GO:0016010);Golgi apparatus (GO:0005794);integral component of plasma membrane (GO:0005887);plasma membrane (GO:0005886);sarcoglycan complex (GO:0016012);sarcolemma (GO:0042383);	Alternative splicing;Cell membrane;Cell projection;Complete proteome;Cytoplasm;Cytoskeleton;Glycoprotein;Golgi apparatus;Membrane;Reference proteome;Transmembrane;Transmembrane helix;Ubl conjugation.;		0.49742	0.815435	0.607785	1	50	38	44	SGCE
Locus_10159_Transcript_6/7_Confidence_0.684_Length_4401	4401	Locus_10159_Transcript_6/7_Confidence_0.684_Length_4401	4401	Locus_10159_Transcript_6/7_Confidence_0.684_Length_4401	4401	O70258	92.732	0	SGCE_MOUSE	Epsilon-sarcoglycan	mmu:20392	GO:0005856 \\ GO:0030425 \\ GO:0032590 \\ GO:0016010 \\ GO:0005794 \\ GO:0005887 \\ GO:0005886 \\ GO:0016012 \\ GO:0042383 \\	No_GOBP	No_GOMF	cytoskeleton (GO:0005856);dendrite (GO:0030425);dendrite membrane (GO:0032590);dystrophin-associated glycoprotein complex (GO:0016010);Golgi apparatus (GO:0005794);integral component of plasma membrane (GO:0005887);plasma membrane (GO:0005886);sarcoglycan complex (GO:0016012);sarcolemma (GO:0042383);	Alternative splicing;Cell membrane;Cell projection;Complete proteome;Cytoplasm;Cytoskeleton;Glycoprotein;Golgi apparatus;Membrane;Reference proteome;Transmembrane;Transmembrane helix;Ubl conjugation.;		0.0735919	0.973385	0.947403	1	49	50	49.5	SGCE
Locus_101595_Transcript_1/1_Confidence_1.000_Length_431	431	No_sig_nr_hit	No_sig_nr_hit	No_sig_nr_hit	No_sig_nr_hit	No_Uniprotmatch	No_%_identity	No_evalue	No_ID	No_Description	No_KEGG	No_GO	No_GOCC	No_GOBP	No_GOMF	No_keywords		-0.00397278	0.143915	1	1	26	28	27	No
Locus_1016_Transcript_2/8_Confidence_0.250_Length_1142	1142	Locus_1016_Transcript_2/8_Confidence_0.250_Length_1142	1142	Locus_1016_Transcript_2/8_Confidence_0.250_Length_1142	1142	Q5RF00	89.437	9.01e-77	ALDH2_PONAB	Aldehyde dehydrogenase, mitochondrial	pon:100171596	GO:0005759 \\ GO:0004029 \\	No_GOBP	aldehyde dehydrogenase (NAD) activity (GO:0004029);	mitochondrial matrix (GO:0005759);	Acetylation;Complete proteome;Mitochondrion;NAD;Oxidoreductase;Reference proteome;Transit peptide.;		0.0188369	2.0005	0.986967	1	100	106	103	ALDH2
Locus_1016_Transcript_3/8_Confidence_0.500_Length_2320	2320	Locus_1016_Transcript_3/8_Confidence_0.500_Length_2320	2320	Locus_1016_Transcript_3/8_Confidence_0.500_Length_2320	2320	P11884	85.019	0	ALDH2_RAT	Aldehyde dehydrogenase, mitochondrial	rno:29539	GO:0005759 \\ GO:0005739 \\ GO:0004029 \\ GO:0042802 \\ GO:0070404 \\ GO:0071398 \\ GO:0032870 \\ GO:0006068 \\ GO:0001889 \\ GO:0043066 \\ GO:0032355 \\ GO:0055093 \\ GO:0032496 \\ GO:0035094 \\ GO:0032570 \\ GO:0033574 \\	cellular response to fatty acid (GO:0071398);cellular response to hormone stimulus (GO:0032870);ethanol catabolic process (GO:0006068);liver development (GO:0001889);negative regulation of apoptotic process (GO:0043066);response to estradiol (GO:0032355);response to hyperoxia (GO:0055093);response to lipopolysaccharide (GO:0032496);response to nicotine (GO:0035094);response to progesterone (GO:00…	aldehyde dehydrogenase (NAD) activity (GO:0004029);identical protein binding (GO:0042802);NADH binding (GO:0070404);	mitochondrial matrix (GO:0005759);mitochondrion (GO:0005739);	3D-structure;Acetylation;Complete proteome;Direct protein sequencing;Mitochondrion;NAD;Oxidoreductase;Polymorphism;Reference proteome;Transit peptide.;		-0.0372713	5.66307	0.965423	1	1264	1393	1328.5	ALDH2
Locus_1016_Transcript_4/8_Confidence_0.438_Length_2190	2190	Locus_1016_Transcript_4/8_Confidence_0.438_Length_2190	2190	Locus_1016_Transcript_4/8_Confidence_0.438_Length_2190	2190	P81178	88.767	0	ALDH2_MESAU	Aldehyde dehydrogenase, mitochondrial	No_KEGG	GO:0005759 \\ GO:0004029 \\ GO:0006068 \\	ethanol catabolic process (GO:0006068);	aldehyde dehydrogenase (NAD) activity (GO:0004029);	mitochondrial matrix (GO:0005759);	Acetylation;Direct protein sequencing;Mitochondrion;NAD;Oxidoreductase.;		-0.0593381	4.9342	0.944916	1	756	846	801	ALDH2
Locus_1016_Transcript_5/8_Confidence_0.625_Length_3322	3322	Locus_1016_Transcript_5/8_Confidence_0.625_Length_3322	3322	Locus_1016_Transcript_5/8_Confidence_0.625_Length_3322	3322	P81178	88.767	0	ALDH2_MESAU	Aldehyde dehydrogenase, mitochondrial	No_KEGG	GO:0005759 \\ GO:0004029 \\ GO:0006068 \\	ethanol catabolic process (GO:0006068);	aldehyde dehydrogenase (NAD) activity (GO:0004029);	mitochondrial matrix (GO:0005759);	Acetylation;Direct protein sequencing;Mitochondrion;NAD;Oxidoreductase.;		0.0132591	5.68922	0.988338	1	1310	1394	1352	ALDH2
Locus_1016_Transcript_6/8_Confidence_0.438_Length_2112	2112	Locus_1016_Transcript_6/8_Confidence_0.438_Length_2112	2112	Locus_1016_Transcript_6/8_Confidence_0.438_Length_2112	2112	P81178	88.767	0	ALDH2_MESAU	Aldehyde dehydrogenase, mitochondrial	No_KEGG	GO:0005759 \\ GO:0004029 \\ GO:0006068 \\	ethanol catabolic process (GO:0006068);	aldehyde dehydrogenase (NAD) activity (GO:0004029);	mitochondrial matrix (GO:0005759);	Acetylation;Direct protein sequencing;Mitochondrion;NAD;Oxidoreductase.;		-0.13734	4.99526	0.87174	1	767	906	836.5	ALDH2
Locus_1016_Transcript_7/8_Confidence_0.562_Length_1893	1893	Locus_1016_Transcript_7/8_Confidence_0.562_Length_1893	1893	Locus_1016_Transcript_7/8_Confidence_0.562_Length_1893	1893	Q5RF00	89.437	4.07e-74	ALDH2_PONAB	Aldehyde dehydrogenase, mitochondrial	pon:100171596	GO:0005759 \\ GO:0004029 \\	No_GOBP	aldehyde dehydrogenase (NAD) activity (GO:0004029);	mitochondrial matrix (GO:0005759);	Acetylation;Complete proteome;Mitochondrion;NAD;Oxidoreductase;Reference proteome;Transit peptide.;		0.0246076	4.8515	0.978133	1	735	776	755.5	ALDH2
Locus_1016_Transcript_8/8_Confidence_0.500_Length_2621	2621	Locus_1016_Transcript_8/8_Confidence_0.500_Length_2621	2621	Locus_1016_Transcript_8/8_Confidence_0.500_Length_2621	2621	P81178	88.767	0	ALDH2_MESAU	Aldehyde dehydrogenase, mitochondrial	No_KEGG	GO:0005759 \\ GO:0004029 \\ GO:0006068 \\	ethanol catabolic process (GO:0006068);	aldehyde dehydrogenase (NAD) activity (GO:0004029);	mitochondrial matrix (GO:0005759);	Acetylation;Direct protein sequencing;Mitochondrion;NAD;Oxidoreductase.;		-0.00662486	5.80205	0.994614	1	1407	1518	1462.5	ALDH2
Locus_10160_Transcript_2/10_Confidence_0.414_Length_1827	1827	Locus_10160_Transcript_2/10_Confidence_0.414_Length_1827	1827	Locus_10160_Transcript_2/10_Confidence_0.414_Length_1827	1827	Q9D5J6	66.366	6.03e-157	SHPK_MOUSE	Sedoheptulokinase	mmu:74637	GO:0005737 \\ GO:0005524 \\ GO:0050277 \\ GO:0005975 \\ GO:0035963 \\ GO:0071353 \\ GO:0071222 \\ GO:0009052 \\ GO:0016310 \\ GO:0050727 \\ GO:0043030 \\	carbohydrate metabolic process (GO:0005975);cellular response to interleukin-13 (GO:0035963);cellular response to interleukin-4 (GO:0071353);cellular response to lipopolysaccharide (GO:0071222);pentose-phosphate shunt, non-oxidative branch (GO:0009052);phosphorylation (GO:0016310);regulation of inflammatory response (GO:0050727);regulation of macrophage activation (GO:0043030);	ATP binding (GO:0005524);sedoheptulokinase activity (GO:0050277);	cytoplasm (GO:0005737);	ATP-binding;Complete proteome;Cytoplasm;Kinase;Nucleotide-binding;Reference proteome;Transferase.;		0.101768	-1.01298	1	1	11	11	11	SHPK
Locus_10160_Transcript_4/10_Confidence_0.207_Length_1907	1907	Locus_10160_Transcript_4/10_Confidence_0.207_Length_1907	1907	Locus_10160_Transcript_4/10_Confidence_0.207_Length_1907	1907	Q9D5J6	67.354	1.18e-138	SHPK_MOUSE	Sedoheptulokinase	mmu:74637	GO:0005737 \\ GO:0005524 \\ GO:0050277 \\ GO:0005975 \\ GO:0035963 \\ GO:0071353 \\ GO:0071222 \\ GO:0009052 \\ GO:0016310 \\ GO:0050727 \\ GO:0043030 \\	carbohydrate metabolic process (GO:0005975);cellular response to interleukin-13 (GO:0035963);cellular response to interleukin-4 (GO:0071353);cellular response to lipopolysaccharide (GO:0071222);pentose-phosphate shunt, non-oxidative branch (GO:0009052);phosphorylation (GO:0016310);regulation of inflammatory response (GO:0050727);regulation of macrophage activation (GO:0043030);	ATP binding (GO:0005524);sedoheptulokinase activity (GO:0050277);	cytoplasm (GO:0005737);	ATP-binding;Complete proteome;Cytoplasm;Kinase;Nucleotide-binding;Reference proteome;Transferase.;		0.405092	-0.318348	0.691654	1	21	17	19	SHPK
Locus_10160_Transcript_5/10_Confidence_0.586_Length_2118	2118	Locus_10160_Transcript_5/10_Confidence_0.586_Length_2118	2118	Locus_10160_Transcript_5/10_Confidence_0.586_Length_2118	2118	Q9UHJ6	65.106	2.68e-104	SHPK_HUMAN	Sedoheptulokinase	hsa:23729	GO:0005737 \\ GO:0005524 \\ GO:0050277 \\ GO:0005975 \\ GO:0035963 \\ GO:0071353 \\ GO:0071222 \\ GO:0009052 \\ GO:0016310 \\ GO:0050727 \\ GO:0043030 \\	carbohydrate metabolic process (GO:0005975);cellular response to interleukin-13 (GO:0035963);cellular response to interleukin-4 (GO:0071353);cellular response to lipopolysaccharide (GO:0071222);pentose-phosphate shunt, non-oxidative branch (GO:0009052);phosphorylation (GO:0016310);regulation of inflammatory response (GO:0050727);regulation of macrophage activation (GO:0043030);	ATP binding (GO:0005524);sedoheptulokinase activity (GO:0050277);	cytoplasm (GO:0005737);	ATP-binding;Complete proteome;Cytoplasm;Kinase;Nucleotide-binding;Polymorphism;Reference proteome;Transferase.;		-0.216982	-0.761307	0.912874	1	12	15	13.5	SHPK
Locus_10160_Transcript_8/10_Confidence_0.414_Length_2122	2122	Locus_10160_Transcript_8/10_Confidence_0.414_Length_2122	2122	Locus_10160_Transcript_8/10_Confidence_0.414_Length_2122	2122	Q9D5J6	62.26	0	SHPK_MOUSE	Sedoheptulokinase	mmu:74637	GO:0005737 \\ GO:0005524 \\ GO:0050277 \\ GO:0005975 \\ GO:0035963 \\ GO:0071353 \\ GO:0071222 \\ GO:0009052 \\ GO:0016310 \\ GO:0050727 \\ GO:0043030 \\	carbohydrate metabolic process (GO:0005975);cellular response to interleukin-13 (GO:0035963);cellular response to interleukin-4 (GO:0071353);cellular response to lipopolysaccharide (GO:0071222);pentose-phosphate shunt, non-oxidative branch (GO:0009052);phosphorylation (GO:0016310);regulation of inflammatory response (GO:0050727);regulation of macrophage activation (GO:0043030);	ATP binding (GO:0005524);sedoheptulokinase activity (GO:0050277);	cytoplasm (GO:0005737);	ATP-binding;Complete proteome;Cytoplasm;Kinase;Nucleotide-binding;Reference proteome;Transferase.;		-0.17576	-0.586044	1	1	14	17	15.5	SHPK
Locus_10160_Transcript_9/10_Confidence_0.448_Length_2743	2743	Locus_10160_Transcript_9/10_Confidence_0.448_Length_2743	2743	Locus_10160_Transcript_9/10_Confidence_0.448_Length_2743	2743	Q9D5J6	67.354	2.7e-135	SHPK_MOUSE	Sedoheptulokinase	mmu:74637	GO:0005737 \\ GO:0005524 \\ GO:0050277 \\ GO:0005975 \\ GO:0035963 \\ GO:0071353 \\ GO:0071222 \\ GO:0009052 \\ GO:0016310 \\ GO:0050727 \\ GO:0043030 \\	carbohydrate metabolic process (GO:0005975);cellular response to interleukin-13 (GO:0035963);cellular response to interleukin-4 (GO:0071353);cellular response to lipopolysaccharide (GO:0071222);pentose-phosphate shunt, non-oxidative branch (GO:0009052);phosphorylation (GO:0016310);regulation of inflammatory response (GO:0050727);regulation of macrophage activation (GO:0043030);	ATP binding (GO:0005524);sedoheptulokinase activity (GO:0050277);	cytoplasm (GO:0005737);	ATP-binding;Complete proteome;Cytoplasm;Kinase;Nucleotide-binding;Reference proteome;Transferase.;		-0.232748	-0.161489	0.88719	1	19	24	21.5	SHPK
Locus_101608_Transcript_1/1_Confidence_1.000_Length_502	502	No_sig_nr_hit	No_sig_nr_hit	No_sig_nr_hit	No_sig_nr_hit	No_Uniprotmatch	No_%_identity	No_evalue	No_ID	No_Description	No_KEGG	No_GO	No_GOCC	No_GOBP	No_GOMF	No_keywords		0.194464	-0.583299	0.850328	1	16	15	15.5	No
Locus_10161_Transcript_1/1_Confidence_1.000_Length_1299	1299	Locus_10161_Transcript_1/1_Confidence_1.000_Length_1299	1299	Locus_10161_Transcript_1/1_Confidence_1.000_Length_1299	1299	Q9NWR8	62.937	5.1e-123	MCUB_HUMAN	Calcium uniporter regulatory subunit MCUb, mitochondrial	hsa:55013	GO:0034704 \\ GO:0031305 \\ GO:0031224 \\ GO:0005739 \\ GO:1990246 \\ GO:0019855 \\ GO:0036444 \\ GO:0051560 \\ GO:0006851 \\	calcium ion transmembrane import into mitochondrion (GO:0036444);mitochondrial calcium ion homeostasis (GO:0051560);mitochondrial calcium ion transport (GO:0006851);	calcium channel inhibitor activity (GO:0019855);	calcium channel complex (GO:0034704);integral component of mitochondrial inner membrane (GO:0031305);intrinsic component of membrane (GO:0031224);mitochondrion (GO:0005739);uniplex complex (GO:1990246);	Calcium;Calcium transport;Coiled coil;Complete proteome;Ion transport;Membrane;Mitochondrion;Mitochondrion inner membrane;Polymorphism;Reference proteome;Transit peptide;Transmembrane;Transmembrane helix;Transport.;		0.0949206	3.79536	0.913057	1	361	363	362	MCUB
Locus_101618_Transcript_1/1_Confidence_1.000_Length_370	370	No_sig_nr_hit	No_sig_nr_hit	No_sig_nr_hit	No_sig_nr_hit	No_Uniprotmatch	No_%_identity	No_evalue	No_ID	No_Description	No_KEGG	No_GO	No_GOCC	No_GOBP	No_GOMF	No_keywords		0.567743	-0.580553	0.644899	1	18	13	15.5	No
Locus_10163_Transcript_1/2_Confidence_0.750_Length_2966	2966	No_sig_nr_hit	No_sig_nr_hit	No_sig_nr_hit	No_sig_nr_hit	No_Uniprotmatch	No_%_identity	No_evalue	No_ID	No_Description	No_KEGG	No_GO	No_GOCC	No_GOBP	No_GOMF	No_keywords		-0.107018	2.47908	0.906514	1	134	155	144.5	No
Locus_10164_Transcript_1/1_Confidence_1.000_Length_3107	3107	Locus_10164_Transcript_1/1_Confidence_1.000_Length_3107	3107	Locus_10164_Transcript_1/1_Confidence_1.000_Length_3107	3107	Q3SZ48	92.52	1.89e-164	TM55A_BOVIN	Type 2 phosphatidylinositol 4,5-bisphosphate 4-phosphatase	bta:616641	GO:0016021 \\ GO:0031902 \\ GO:0005765 \\ GO:0034597 \\ GO:0046856 \\	phosphatidylinositol dephosphorylation (GO:0046856);	phosphatidylinositol-4,5-bisphosphate 4-phosphatase activity (GO:0034597);	integral component of membrane (GO:0016021);late endosome membrane (GO:0031902);lysosomal membrane (GO:0005765);	Complete proteome;Endosome;Hydrolase;Lysosome;Membrane;Phosphoprotein;Reference proteome;Transmembrane;Transmembrane helix.;		0.0821956	3.74062	0.925491	1	346	351	348.5	TM55A
Locus_10165_Transcript_1/8_Confidence_0.368_Length_2983	2983	Locus_10165_Transcript_1/8_Confidence_0.368_Length_2983	2983	Locus_10165_Transcript_1/8_Confidence_0.368_Length_2983	2983	Q12959	91.823	0	DLG1_HUMAN	Disks large homolog 1	hsa:1739	GO:0005605 \\ GO:0016323 \\ GO:0005923 \\ GO:0030054 \\ GO:0031253 \\ GO:0005911 \\ GO:0005737 \\ GO:0009898 \\ GO:0005829 \\ GO:0005783 \\ GO:0005789 \\ GO:0070062 \\ GO:0005794 \\ GO:0001772 \\ GO:0014704 \\ GO:0043219 \\ GO:0016328 \\ GO:0045121 \\ GO:0005874 \\ GO:0097025 \\ GO:0035748 \\ GO:0031594 \\ GO:0033268 \\ GO:0005634 \\ GO:0048471 \\ GO:0005886 \\ GO:0014069 \\ GO:0045211 \\ GO:0042…	actin filament organization (GO:0007015);activation of protein kinase activity (GO:0032147);amyloid precursor protein metabolic process (GO:0042982);astral microtubule organization (GO:0030953);axon guidance (GO:0007411);bicellular tight junction assembly (GO:0070830);branching involved in ureteric bud morphogenesis (GO:0001658);cellular protein complex localization (GO:0034629);cortical actin cy…	cytoskeletal protein binding (GO:0008092);guanylate kinase activity (GO:0004385);ion channel binding (GO:0044325);ionotropic glutamate receptor binding (GO:0035255);L27 domain binding (GO:0097016);mitogen-activated protein kinase kinase binding (GO:0031434);phosphatase binding (GO:0019902);phosphoprotein phosphatase activity (GO:0004721);potassium channel regulator activity (GO:0015459);protein C…	basal lamina (GO:0005605);basolateral plasma membrane (GO:0016323);bicellular tight junction (GO:0005923);cell junction (GO:0030054);cell projection membrane (GO:0031253);cell-cell junction (GO:0005911);cytoplasm (GO:0005737);cytoplasmic side of plasma membrane (GO:0009898);cytosol (GO:0005829);endoplasmic reticulum (GO:0005783);endoplasmic reticulum membrane (GO:0005789);extracellular exosome (G…	3D-structure;Alternative splicing;Cell junction;Cell membrane;Complete proteome;Endoplasmic reticulum;Host-virus interaction;Membrane;Phosphoprotein;Polymorphism;Postsynaptic cell membrane;Reference proteome;Repeat;SH3 domain;Synapse.;		0.499816	1.52161	0.584675	1	83	63	73	DLG1
Locus_10165_Transcript_4/8_Confidence_0.526_Length_3032	3032	Locus_10165_Transcript_4/8_Confidence_0.526_Length_3032	3032	Locus_10165_Transcript_4/8_Confidence_0.526_Length_3032	3032	Q12959	87.941	0	DLG1_HUMAN	Disks large homolog 1	hsa:1739	GO:0005605 \\ GO:0016323 \\ GO:0005923 \\ GO:0030054 \\ GO:0031253 \\ GO:0005911 \\ GO:0005737 \\ GO:0009898 \\ GO:0005829 \\ GO:0005783 \\ GO:0005789 \\ GO:0070062 \\ GO:0005794 \\ GO:0001772 \\ GO:0014704 \\ GO:0043219 \\ GO:0016328 \\ GO:0045121 \\ GO:0005874 \\ GO:0097025 \\ GO:0035748 \\ GO:0031594 \\ GO:0033268 \\ GO:0005634 \\ GO:0048471 \\ GO:0005886 \\ GO:0014069 \\ GO:0045211 \\ GO:0042…	actin filament organization (GO:0007015);activation of protein kinase activity (GO:0032147);amyloid precursor protein metabolic process (GO:0042982);astral microtubule organization (GO:0030953);axon guidance (GO:0007411);bicellular tight junction assembly (GO:0070830);branching involved in ureteric bud morphogenesis (GO:0001658);cellular protein complex localization (GO:0034629);cortical actin cy…	cytoskeletal protein binding (GO:0008092);guanylate kinase activity (GO:0004385);ion channel binding (GO:0044325);ionotropic glutamate receptor binding (GO:0035255);L27 domain binding (GO:0097016);mitogen-activated protein kinase kinase binding (GO:0031434);phosphatase binding (GO:0019902);phosphoprotein phosphatase activity (GO:0004721);potassium channel regulator activity (GO:0015459);protein C…	basal lamina (GO:0005605);basolateral plasma membrane (GO:0016323);bicellular tight junction (GO:0005923);cell junction (GO:0030054);cell projection membrane (GO:0031253);cell-cell junction (GO:0005911);cytoplasm (GO:0005737);cytoplasmic side of plasma membrane (GO:0009898);cytosol (GO:0005829);endoplasmic reticulum (GO:0005783);endoplasmic reticulum membrane (GO:0005789);extracellular exosome (G…	3D-structure;Alternative splicing;Cell junction;Cell membrane;Complete proteome;Endoplasmic reticulum;Host-virus interaction;Membrane;Phosphoprotein;Polymorphism;Postsynaptic cell membrane;Reference proteome;Repeat;SH3 domain;Synapse.;		-0.516259	1.41866	0.572341	1	54	83	68.5	DLG1
Locus_10165_Transcript_5/8_Confidence_0.474_Length_3025	3025	Locus_10165_Transcript_5/8_Confidence_0.474_Length_3025	3025	Locus_10165_Transcript_5/8_Confidence_0.474_Length_3025	3025	Q12959	93.481	0	DLG1_HUMAN	Disks large homolog 1	hsa:1739	GO:0005605 \\ GO:0016323 \\ GO:0005923 \\ GO:0030054 \\ GO:0031253 \\ GO:0005911 \\ GO:0005737 \\ GO:0009898 \\ GO:0005829 \\ GO:0005783 \\ GO:0005789 \\ GO:0070062 \\ GO:0005794 \\ GO:0001772 \\ GO:0014704 \\ GO:0043219 \\ GO:0016328 \\ GO:0045121 \\ GO:0005874 \\ GO:0097025 \\ GO:0035748 \\ GO:0031594 \\ GO:0033268 \\ GO:0005634 \\ GO:0048471 \\ GO:0005886 \\ GO:0014069 \\ GO:0045211 \\ GO:0042…	actin filament organization (GO:0007015);activation of protein kinase activity (GO:0032147);amyloid precursor protein metabolic process (GO:0042982);astral microtubule organization (GO:0030953);axon guidance (GO:0007411);bicellular tight junction assembly (GO:0070830);branching involved in ureteric bud morphogenesis (GO:0001658);cellular protein complex localization (GO:0034629);cortical actin cy…	cytoskeletal protein binding (GO:0008092);guanylate kinase activity (GO:0004385);ion channel binding (GO:0044325);ionotropic glutamate receptor binding (GO:0035255);L27 domain binding (GO:0097016);mitogen-activated protein kinase kinase binding (GO:0031434);phosphatase binding (GO:0019902);phosphoprotein phosphatase activity (GO:0004721);potassium channel regulator activity (GO:0015459);protein C…	basal lamina (GO:0005605);basolateral plasma membrane (GO:0016323);bicellular tight junction (GO:0005923);cell junction (GO:0030054);cell projection membrane (GO:0031253);cell-cell junction (GO:0005911);cytoplasm (GO:0005737);cytoplasmic side of plasma membrane (GO:0009898);cytosol (GO:0005829);endoplasmic reticulum (GO:0005783);endoplasmic reticulum membrane (GO:0005789);extracellular exosome (G…	3D-structure;Alternative splicing;Cell junction;Cell membrane;Complete proteome;Endoplasmic reticulum;Host-virus interaction;Membrane;Phosphoprotein;Polymorphism;Postsynaptic cell membrane;Reference proteome;Repeat;SH3 domain;Synapse.;		0.185056	1.45841	0.85042	1	72	68	70	DLG1
Locus_10165_Transcript_7/8_Confidence_0.526_Length_3091	3091	Locus_10165_Transcript_7/8_Confidence_0.526_Length_3091	3091	Locus_10165_Transcript_7/8_Confidence_0.526_Length_3091	3091	Q12959	90.399	0	DLG1_HUMAN	Disks large homolog 1	hsa:1739	GO:0005605 \\ GO:0016323 \\ GO:0005923 \\ GO:0030054 \\ GO:0031253 \\ GO:0005911 \\ GO:0005737 \\ GO:0009898 \\ GO:0005829 \\ GO:0005783 \\ GO:0005789 \\ GO:0070062 \\ GO:0005794 \\ GO:0001772 \\ GO:0014704 \\ GO:0043219 \\ GO:0016328 \\ GO:0045121 \\ GO:0005874 \\ GO:0097025 \\ GO:0035748 \\ GO:0031594 \\ GO:0033268 \\ GO:0005634 \\ GO:0048471 \\ GO:0005886 \\ GO:0014069 \\ GO:0045211 \\ GO:0042…	actin filament organization (GO:0007015);activation of protein kinase activity (GO:0032147);amyloid precursor protein metabolic process (GO:0042982);astral microtubule organization (GO:0030953);axon guidance (GO:0007411);bicellular tight junction assembly (GO:0070830);branching involved in ureteric bud morphogenesis (GO:0001658);cellular protein complex localization (GO:0034629);cortical actin cy…	cytoskeletal protein binding (GO:0008092);guanylate kinase activity (GO:0004385);ion channel binding (GO:0044325);ionotropic glutamate receptor binding (GO:0035255);L27 domain binding (GO:0097016);mitogen-activated protein kinase kinase binding (GO:0031434);phosphatase binding (GO:0019902);phosphoprotein phosphatase activity (GO:0004721);potassium channel regulator activity (GO:0015459);protein C…	basal lamina (GO:0005605);basolateral plasma membrane (GO:0016323);bicellular tight junction (GO:0005923);cell junction (GO:0030054);cell projection membrane (GO:0031253);cell-cell junction (GO:0005911);cytoplasm (GO:0005737);cytoplasmic side of plasma membrane (GO:0009898);cytosol (GO:0005829);endoplasmic reticulum (GO:0005783);endoplasmic reticulum membrane (GO:0005789);extracellular exosome (G…	3D-structure;Alternative splicing;Cell junction;Cell membrane;Complete proteome;Endoplasmic reticulum;Host-virus interaction;Membrane;Phosphoprotein;Polymorphism;Postsynaptic cell membrane;Reference proteome;Repeat;SH3 domain;Synapse.;		0.0684707	1.71321	0.95239	1	83	85	84	DLG1
Locus_10165_Transcript_8/8_Confidence_0.579_Length_3125	3125	Locus_10165_Transcript_8/8_Confidence_0.579_Length_3125	3125	Locus_10165_Transcript_8/8_Confidence_0.579_Length_3125	3125	Q12959	91.324	0	DLG1_HUMAN	Disks large homolog 1	hsa:1739	GO:0005605 \\ GO:0016323 \\ GO:0005923 \\ GO:0030054 \\ GO:0031253 \\ GO:0005911 \\ GO:0005737 \\ GO:0009898 \\ GO:0005829 \\ GO:0005783 \\ GO:0005789 \\ GO:0070062 \\ GO:0005794 \\ GO:0001772 \\ GO:0014704 \\ GO:0043219 \\ GO:0016328 \\ GO:0045121 \\ GO:0005874 \\ GO:0097025 \\ GO:0035748 \\ GO:0031594 \\ GO:0033268 \\ GO:0005634 \\ GO:0048471 \\ GO:0005886 \\ GO:0014069 \\ GO:0045211 \\ GO:0042…	actin filament organization (GO:0007015);activation of protein kinase activity (GO:0032147);amyloid precursor protein metabolic process (GO:0042982);astral microtubule organization (GO:0030953);axon guidance (GO:0007411);bicellular tight junction assembly (GO:0070830);branching involved in ureteric bud morphogenesis (GO:0001658);cellular protein complex localization (GO:0034629);cortical actin cy…	cytoskeletal protein binding (GO:0008092);guanylate kinase activity (GO:0004385);ion channel binding (GO:0044325);ionotropic glutamate receptor binding (GO:0035255);L27 domain binding (GO:0097016);mitogen-activated protein kinase kinase binding (GO:0031434);phosphatase binding (GO:0019902);phosphoprotein phosphatase activity (GO:0004721);potassium channel regulator activity (GO:0015459);protein C…	basal lamina (GO:0005605);basolateral plasma membrane (GO:0016323);bicellular tight junction (GO:0005923);cell junction (GO:0030054);cell projection membrane (GO:0031253);cell-cell junction (GO:0005911);cytoplasm (GO:0005737);cytoplasmic side of plasma membrane (GO:0009898);cytosol (GO:0005829);endoplasmic reticulum (GO:0005783);endoplasmic reticulum membrane (GO:0005789);extracellular exosome (G…	3D-structure;Alternative splicing;Cell junction;Cell membrane;Complete proteome;Endoplasmic reticulum;Host-virus interaction;Membrane;Phosphoprotein;Polymorphism;Postsynaptic cell membrane;Reference proteome;Repeat;SH3 domain;Synapse.;		-0.0706274	1.83185	0.941572	1	86	97	91.5	DLG1
Locus_10166_Transcript_2/3_Confidence_0.667_Length_2934	2934	Locus_10166_Transcript_2/3_Confidence_0.667_Length_2934	2934	Locus_10166_Transcript_2/3_Confidence_0.667_Length_2934	2934	Q9R097	54.658	7.7e-111	SPIT1_MOUSE	Kunitz-type protease inhibitor 1	mmu:20732	GO:0070062 \\ GO:0005615 \\ GO:0005886 \\ GO:0004867 \\ GO:0060670 \\ GO:0071773 \\ GO:0001892 \\ GO:0030198 \\ GO:2000178 \\ GO:0001843 \\ GO:0060674 \\ GO:0045687 \\	branching involved in labyrinthine layer morphogenesis (GO:0060670);cellular response to BMP stimulus (GO:0071773);embryonic placenta development (GO:0001892);extracellular matrix organization (GO:0030198);negative regulation of neural precursor cell proliferation (GO:2000178);neural tube closure (GO:0001843);placenta blood vessel development (GO:0060674);positive regulation of glial cell differe…	serine-type endopeptidase inhibitor activity (GO:0004867);	extracellular exosome (GO:0070062);extracellular space (GO:0005615);plasma membrane (GO:0005886);	Complete proteome;Disulfide bond;Glycoprotein;Protease inhibitor;Reference proteome;Repeat;Secreted;Serine protease inhibitor;Signal.;		-0.0489501	0.914733	1	1	45	50	47.5	SPIT1
Locus_10166_Transcript_3/3_Confidence_0.667_Length_3377	3377	Locus_10166_Transcript_3/3_Confidence_0.667_Length_3377	3377	Locus_10166_Transcript_3/3_Confidence_0.667_Length_3377	3377	Q9R097	51.037	9.06e-161	SPIT1_MOUSE	Kunitz-type protease inhibitor 1	mmu:20732	GO:0070062 \\ GO:0005615 \\ GO:0005886 \\ GO:0004867 \\ GO:0060670 \\ GO:0071773 \\ GO:0001892 \\ GO:0030198 \\ GO:2000178 \\ GO:0001843 \\ GO:0060674 \\ GO:0045687 \\	branching involved in labyrinthine layer morphogenesis (GO:0060670);cellular response to BMP stimulus (GO:0071773);embryonic placenta development (GO:0001892);extracellular matrix organization (GO:0030198);negative regulation of neural precursor cell proliferation (GO:2000178);neural tube closure (GO:0001843);placenta blood vessel development (GO:0060674);positive regulation of glial cell differe…	serine-type endopeptidase inhibitor activity (GO:0004867);	extracellular exosome (GO:0070062);extracellular space (GO:0005615);plasma membrane (GO:0005886);	Complete proteome;Disulfide bond;Glycoprotein;Protease inhibitor;Reference proteome;Repeat;Secreted;Serine protease inhibitor;Signal.;		-0.31862	1.20073	0.734881	1	50	67	58.5	SPIT1
Locus_101662_Transcript_1/1_Confidence_1.000_Length_216	216	No_sig_nr_hit	No_sig_nr_hit	No_sig_nr_hit	No_sig_nr_hit	No_Uniprotmatch	No_%_identity	No_evalue	No_ID	No_Description	No_KEGG	No_GO	No_GOCC	No_GOBP	No_GOMF	No_keywords		0.101768	-1.01298	1	1	11	11	11	No
Locus_10167_Transcript_1/1_Confidence_1.000_Length_3087	3087	Locus_10167_Transcript_1/1_Confidence_1.000_Length_3087	3087	Locus_10167_Transcript_1/1_Confidence_1.000_Length_3087	3087	Q9WUR9	78.924	6.5e-123	KAD4_MOUSE	Adenylate kinase 4, mitochondrial {ECO:0000255|HAMAP-Rule:MF_03170}	mmu:11639	GO:0070062 \\ GO:0005759 \\ GO:0005739 \\ GO:0004017 \\ GO:0005524 \\ GO:0005525 \\ GO:0004550 \\ GO:0046899 \\ GO:0006172 \\ GO:0046033 \\ GO:0046034 \\ GO:0007420 \\ GO:0046039 \\ GO:0001889 \\ GO:0006165 \\ GO:0009142 \\ GO:0042493 \\	ADP biosynthetic process (GO:0006172);AMP metabolic process (GO:0046033);ATP metabolic process (GO:0046034);brain development (GO:0007420);GTP metabolic process (GO:0046039);liver development (GO:0001889);nucleoside diphosphate phosphorylation (GO:0006165);nucleoside triphosphate biosynthetic process (GO:0009142);response to drug (GO:0042493);	adenylate kinase activity (GO:0004017);ATP binding (GO:0005524);GTP binding (GO:0005525);nucleoside diphosphate kinase activity (GO:0004550);nucleoside triphosphate adenylate kinase activity (GO:0046899);	extracellular exosome (GO:0070062);mitochondrial matrix (GO:0005759);mitochondrion (GO:0005739);	Acetylation;ATP-binding;Complete proteome;GTP-binding;Kinase;Mitochondrion;Nucleotide-binding;Reference proteome;Transferase.;		0.0800465	1.32046	0.958471	1	63	64	63.5	KAD4
Locus_101671_Transcript_1/1_Confidence_1.000_Length_458	458	Locus_101671_Transcript_1/1_Confidence_1.000_Length_458	458	Locus_101671_Transcript_1/1_Confidence_1.000_Length_458	458	A0A091T4Z0	55.102	4.53e-07	A0A091T4Z0_PHALP	Uncharacterized protein {ECO:0000313|EMBL:KFQ69441.1}	No_KEGG	No_GOcodes	No_GOBP	No_GOMF	No_GOCC	Complete proteome {ECO:0000313|Proteomes:UP000053638}.;		1.0436	-0.213417	0.288971	1	27	14	20.5	A0A091T4Z0
Locus_10168_Transcript_2/4_Confidence_0.700_Length_5382	5382	Locus_10168_Transcript_2/4_Confidence_0.700_Length_5382	5382	Locus_10168_Transcript_2/4_Confidence_0.700_Length_5382	5382	O94986	43.851	0	CE152_HUMAN	Centrosomal protein of 152 kDa	hsa:22995	GO:0005814 \\ GO:0005813 \\ GO:0005829 \\ GO:0098536 \\ GO:0005654 \\ GO:0000242 \\ GO:0019901 \\ GO:0030030 \\ GO:0007099 \\ GO:0051298 \\ GO:0098535 \\ GO:0000086 \\ GO:0000278 \\ GO:0006996 \\	cell projection organization (GO:0030030);centriole replication (GO:0007099);centrosome duplication (GO:0051298);de novo centriole assembly (GO:0098535);G2/M transition of mitotic cell cycle (GO:0000086);mitotic cell cycle (GO:0000278);organelle organization (GO:0006996);	protein kinase binding (GO:0019901);	centriole (GO:0005814);centrosome (GO:0005813);cytosol (GO:0005829);deuterosome (GO:0098536);nucleoplasm (GO:0005654);pericentriolar material (GO:0000242);	3D-structure;Alternative splicing;Cilium biogenesis/degradation;Coiled coil;Complete proteome;Cytoplasm;Cytoskeleton;Disease mutation;Dwarfism;Mental retardation;Polymorphism;Primary microcephaly;Reference proteome.;		-0.287431	-0.358814	0.871363	1	16	21	18.5	CE152
Locus_10169_Transcript_4/4_Confidence_0.625_Length_2391	2391	Locus_10169_Transcript_4/4_Confidence_0.625_Length_2391	2391	Locus_10169_Transcript_4/4_Confidence_0.625_Length_2391	2391	Q9BYH8	70.335	0	IKBZ_HUMAN	NF-kappa-B inhibitor zeta	hsa:64332	GO:0005634 \\ GO:0003712 \\ GO:0006954 \\ GO:0006357 \\ GO:0006351 \\	inflammatory response (GO:0006954);regulation of transcription from RNA polymerase II promoter (GO:0006357);transcription, DNA-templated (GO:0006351);	transcription cofactor activity (GO:0003712);	nucleus (GO:0005634);	Activator;Alternative splicing;ANK repeat;Complete proteome;Nucleus;Polymorphism;Reference proteome;Repeat;Repressor;Transcription;Transcription regulation.;		1.09467	-0.383552	0.321353	1	24	12	18	IKBZ
Locus_1017_Transcript_10/12_Confidence_0.288_Length_5121	5121	Locus_1017_Transcript_10/12_Confidence_0.288_Length_5121	5121	Locus_1017_Transcript_10/12_Confidence_0.288_Length_5121	5121	Q9HCN8	80.392	7.06e-69	SDF2L_HUMAN	Stromal cell-derived factor 2-like protein 1	hsa:23753	GO:0031502 \\ GO:0034663 \\ GO:0005788 \\ GO:0000032 \\ GO:0044845 \\ GO:0071712 \\ GO:0007275 \\ GO:0035269 \\ GO:0042981 \\ GO:1900101 \\	cell wall mannoprotein biosynthetic process (GO:0000032);chain elongation of O-linked mannose residue (GO:0044845);ER-associated misfolded protein catabolic process (GO:0071712);multicellular organismal development (GO:0007275);protein O-linked mannosylation (GO:0035269);regulation of apoptotic process (GO:0042981);regulation of endoplasmic reticulum unfolded protein response (GO:1900101);	No_GOMF	dolichyl-phosphate-mannose-protein mannosyltransferase complex (GO:0031502);endoplasmic reticulum chaperone complex (GO:0034663);endoplasmic reticulum lumen (GO:0005788);	Complete proteome;Endoplasmic reticulum;Reference proteome;Repeat;Signal.;		-0.123912	2.92423	0.890032	1	182	213	197.5	SDF2L
Locus_1017_Transcript_5/12_Confidence_0.212_Length_4171	4171	Locus_1017_Transcript_5/12_Confidence_0.212_Length_4171	4171	Locus_1017_Transcript_5/12_Confidence_0.212_Length_4171	4171	Q9HCN8	80.392	5.26e-69	SDF2L_HUMAN	Stromal cell-derived factor 2-like protein 1	hsa:23753	GO:0031502 \\ GO:0034663 \\ GO:0005788 \\ GO:0000032 \\ GO:0044845 \\ GO:0071712 \\ GO:0007275 \\ GO:0035269 \\ GO:0042981 \\ GO:1900101 \\	cell wall mannoprotein biosynthetic process (GO:0000032);chain elongation of O-linked mannose residue (GO:0044845);ER-associated misfolded protein catabolic process (GO:0071712);multicellular organismal development (GO:0007275);protein O-linked mannosylation (GO:0035269);regulation of apoptotic process (GO:0042981);regulation of endoplasmic reticulum unfolded protein response (GO:1900101);	No_GOMF	dolichyl-phosphate-mannose-protein mannosyltransferase complex (GO:0031502);endoplasmic reticulum chaperone complex (GO:0034663);endoplasmic reticulum lumen (GO:0005788);	Complete proteome;Endoplasmic reticulum;Reference proteome;Repeat;Signal.;		0.024521	2.96233	0.986552	1	197	208	202.5	SDF2L
Locus_1017_Transcript_6/12_Confidence_0.115_Length_4009	4009	Locus_1017_Transcript_6/12_Confidence_0.115_Length_4009	4009	Locus_1017_Transcript_6/12_Confidence_0.115_Length_4009	4009	Q9HCN8	75.706	1.75e-74	SDF2L_HUMAN	Stromal cell-derived factor 2-like protein 1	hsa:23753	GO:0031502 \\ GO:0034663 \\ GO:0005788 \\ GO:0000032 \\ GO:0044845 \\ GO:0071712 \\ GO:0007275 \\ GO:0035269 \\ GO:0042981 \\ GO:1900101 \\	cell wall mannoprotein biosynthetic process (GO:0000032);chain elongation of O-linked mannose residue (GO:0044845);ER-associated misfolded protein catabolic process (GO:0071712);multicellular organismal development (GO:0007275);protein O-linked mannosylation (GO:0035269);regulation of apoptotic process (GO:0042981);regulation of endoplasmic reticulum unfolded protein response (GO:1900101);	No_GOMF	dolichyl-phosphate-mannose-protein mannosyltransferase complex (GO:0031502);endoplasmic reticulum chaperone complex (GO:0034663);endoplasmic reticulum lumen (GO:0005788);	Complete proteome;Endoplasmic reticulum;Reference proteome;Repeat;Signal.;		0.150815	3.01973	0.864962	1	214	207	210.5	SDF2L
Locus_1017_Transcript_8/12_Confidence_0.327_Length_3328	3328	Locus_1017_Transcript_8/12_Confidence_0.327_Length_3328	3328	Locus_1017_Transcript_8/12_Confidence_0.327_Length_3328	3328	Q569M2	62.046	9.54e-124	YDJC_XENLA	Carbohydrate deacetylase {ECO:0000250|UniProtKB:Q53WD3}	xla:734411	GO:0016810 \\ GO:0000287 \\ GO:0005975 \\	carbohydrate metabolic process (GO:0005975);	hydrolase activity, acting on carbon-nitrogen (but not peptide) bonds (GO:0016810);magnesium ion binding (GO:0000287);	No_GOCC	Carbohydrate metabolism;Hydrolase;Magnesium;Metal-binding.;		0.42892	1.38974	0.636834	1	74	59	66.5	YDJC
Locus_1017_Transcript_9/12_Confidence_0.365_Length_5754	5754	Locus_1017_Transcript_9/12_Confidence_0.365_Length_5754	5754	Locus_1017_Transcript_9/12_Confidence_0.365_Length_5754	5754	Q569M2	62.046	1.32e-120	YDJC_XENLA	Carbohydrate deacetylase {ECO:0000250|UniProtKB:Q53WD3}	xla:734411	GO:0016810 \\ GO:0000287 \\ GO:0005975 \\	carbohydrate metabolic process (GO:0005975);	hydrolase activity, acting on carbon-nitrogen (but not peptide) bonds (GO:0016810);magnesium ion binding (GO:0000287);	No_GOCC	Carbohydrate metabolism;Hydrolase;Magnesium;Metal-binding.;		0.045186	3.26399	0.961776	1	245	255	250	YDJC
Locus_10170_Transcript_10/10_Confidence_0.520_Length_836	836	Locus_10170_Transcript_10/10_Confidence_0.520_Length_836	836	Locus_10170_Transcript_10/10_Confidence_0.520_Length_836	836	Q9DAA6	82.292	3.5e-115	EXOS1_MOUSE	Exosome complex component CSL4	mmu:66583	GO:0005737 \\ GO:0000178 \\ GO:0000176 \\ GO:0005730 \\ GO:0005654 \\ GO:0005634 \\ GO:0003723 \\ GO:0006396 \\ GO:0006364 \\	RNA processing (GO:0006396);rRNA processing (GO:0006364);	RNA binding (GO:0003723);	cytoplasm (GO:0005737);exosome (RNase complex) (GO:0000178);nuclear exosome (RNase complex) (GO:0000176);nucleolus (GO:0005730);nucleoplasm (GO:0005654);nucleus (GO:0005634);	Alternative splicing;Complete proteome;Cytoplasm;Exosome;Nucleus;Phosphoprotein;Reference proteome;RNA-binding;rRNA processing.;		-0.390903	1.06245	0.686715	1	44	62	53	EXOS1
Locus_10170_Transcript_2/10_Confidence_0.440_Length_761	761	Locus_10170_Transcript_2/10_Confidence_0.440_Length_761	761	Locus_10170_Transcript_2/10_Confidence_0.440_Length_761	761	Q9DAA6	71.875	2.62e-94	EXOS1_MOUSE	Exosome complex component CSL4	mmu:66583	GO:0005737 \\ GO:0000178 \\ GO:0000176 \\ GO:0005730 \\ GO:0005654 \\ GO:0005634 \\ GO:0003723 \\ GO:0006396 \\ GO:0006364 \\	RNA processing (GO:0006396);rRNA processing (GO:0006364);	RNA binding (GO:0003723);	cytoplasm (GO:0005737);exosome (RNase complex) (GO:0000178);nuclear exosome (RNase complex) (GO:0000176);nucleolus (GO:0005730);nucleoplasm (GO:0005654);nucleus (GO:0005634);	Alternative splicing;Complete proteome;Cytoplasm;Exosome;Nucleus;Phosphoprotein;Reference proteome;RNA-binding;rRNA processing.;		-0.225115	0.94143	0.839989	1	43	54	48.5	EXOS1
Locus_10170_Transcript_3/10_Confidence_0.520_Length_785	785	Locus_10170_Transcript_3/10_Confidence_0.520_Length_785	785	Locus_10170_Transcript_3/10_Confidence_0.520_Length_785	785	Q9DAA6	74.479	5.43e-99	EXOS1_MOUSE	Exosome complex component CSL4	mmu:66583	GO:0005737 \\ GO:0000178 \\ GO:0000176 \\ GO:0005730 \\ GO:0005654 \\ GO:0005634 \\ GO:0003723 \\ GO:0006396 \\ GO:0006364 \\	RNA processing (GO:0006396);rRNA processing (GO:0006364);	RNA binding (GO:0003723);	cytoplasm (GO:0005737);exosome (RNase complex) (GO:0000178);nuclear exosome (RNase complex) (GO:0000176);nucleolus (GO:0005730);nucleoplasm (GO:0005654);nucleus (GO:0005634);	Alternative splicing;Complete proteome;Cytoplasm;Exosome;Nucleus;Phosphoprotein;Reference proteome;RNA-binding;rRNA processing.;		0.227835	0.873691	0.804368	1	48	44	46	EXOS1
Locus_10170_Transcript_4/10_Confidence_0.480_Length_910	910	Locus_10170_Transcript_4/10_Confidence_0.480_Length_910	910	Locus_10170_Transcript_4/10_Confidence_0.480_Length_910	910	Q9DAA6	75.893	2.08e-81	EXOS1_MOUSE	Exosome complex component CSL4	mmu:66583	GO:0005737 \\ GO:0000178 \\ GO:0000176 \\ GO:0005730 \\ GO:0005654 \\ GO:0005634 \\ GO:0003723 \\ GO:0006396 \\ GO:0006364 \\	RNA processing (GO:0006396);rRNA processing (GO:0006364);	RNA binding (GO:0003723);	cytoplasm (GO:0005737);exosome (RNase complex) (GO:0000178);nuclear exosome (RNase complex) (GO:0000176);nucleolus (GO:0005730);nucleoplasm (GO:0005654);nucleus (GO:0005634);	Alternative splicing;Complete proteome;Cytoplasm;Exosome;Nucleus;Phosphoprotein;Reference proteome;RNA-binding;rRNA processing.;		-0.0253297	0.840258	1	1	43	47	45	EXOS1
Locus_10170_Transcript_5/10_Confidence_0.400_Length_761	761	Locus_10170_Transcript_5/10_Confidence_0.400_Length_761	761	Locus_10170_Transcript_5/10_Confidence_0.400_Length_761	761	Q9DAA6	90.164	9.75e-76	EXOS1_MOUSE	Exosome complex component CSL4	mmu:66583	GO:0005737 \\ GO:0000178 \\ GO:0000176 \\ GO:0005730 \\ GO:0005654 \\ GO:0005634 \\ GO:0003723 \\ GO:0006396 \\ GO:0006364 \\	RNA processing (GO:0006396);rRNA processing (GO:0006364);	RNA binding (GO:0003723);	cytoplasm (GO:0005737);exosome (RNase complex) (GO:0000178);nuclear exosome (RNase complex) (GO:0000176);nucleolus (GO:0005730);nucleoplasm (GO:0005654);nucleus (GO:0005634);	Alternative splicing;Complete proteome;Cytoplasm;Exosome;Nucleus;Phosphoprotein;Reference proteome;RNA-binding;rRNA processing.;		-0.0852889	0.869906	0.971808	1	43	49	46	EXOS1
Locus_10170_Transcript_7/10_Confidence_0.520_Length_976	976	Locus_10170_Transcript_7/10_Confidence_0.520_Length_976	976	Locus_10170_Transcript_7/10_Confidence_0.520_Length_976	976	Q9DAA6	75	1.24e-86	EXOS1_MOUSE	Exosome complex component CSL4	mmu:66583	GO:0005737 \\ GO:0000178 \\ GO:0000176 \\ GO:0005730 \\ GO:0005654 \\ GO:0005634 \\ GO:0003723 \\ GO:0006396 \\ GO:0006364 \\	RNA processing (GO:0006396);rRNA processing (GO:0006364);	RNA binding (GO:0003723);	cytoplasm (GO:0005737);exosome (RNase complex) (GO:0000178);nuclear exosome (RNase complex) (GO:0000176);nucleolus (GO:0005730);nucleoplasm (GO:0005654);nucleus (GO:0005634);	Alternative splicing;Complete proteome;Cytoplasm;Exosome;Nucleus;Phosphoprotein;Reference proteome;RNA-binding;rRNA processing.;		0.46758	1.23456	0.616185	1	67	52	59.5	EXOS1
Locus_10170_Transcript_8/10_Confidence_0.160_Length_647	647	Locus_10170_Transcript_8/10_Confidence_0.160_Length_647	647	Locus_10170_Transcript_8/10_Confidence_0.160_Length_647	647	Q9Y3B2	68.919	3.58e-28	EXOS1_HUMAN	Exosome complex component CSL4	hsa:51013	GO:0005737 \\ GO:0005829 \\ GO:0000178 \\ GO:0000176 \\ GO:0005730 \\ GO:0005634 \\ GO:0003723 \\ GO:0043928 \\ GO:0010467 \\ GO:0000288 \\ GO:0043488 \\ GO:0006364 \\	exonucleolytic nuclear-transcribed mRNA catabolic process involved in deadenylation-dependent decay (GO:0043928);gene expression (GO:0010467);nuclear-transcribed mRNA catabolic process, deadenylation-dependent decay (GO:0000288);regulation of mRNA stability (GO:0043488);rRNA processing (GO:0006364);	RNA binding (GO:0003723);	cytoplasm (GO:0005737);cytosol (GO:0005829);exosome (RNase complex) (GO:0000178);nuclear exosome (RNase complex) (GO:0000176);nucleolus (GO:0005730);nucleus (GO:0005634);	3D-structure;Complete proteome;Cytoplasm;Exosome;Nucleus;Phosphoprotein;Reference proteome;RNA-binding;rRNA processing.;		-0.158304	-1.01453	0.900044	1	10	12	11	EXOS1
Locus_10170_Transcript_9/10_Confidence_0.200_Length_569	569	Locus_10170_Transcript_9/10_Confidence_0.200_Length_569	569	Locus_10170_Transcript_9/10_Confidence_0.200_Length_569	569	Q9DAA6	90.123	2.7e-47	EXOS1_MOUSE	Exosome complex component CSL4	mmu:66583	GO:0005737 \\ GO:0000178 \\ GO:0000176 \\ GO:0005730 \\ GO:0005654 \\ GO:0005634 \\ GO:0003723 \\ GO:0006396 \\ GO:0006364 \\	RNA processing (GO:0006396);rRNA processing (GO:0006364);	RNA binding (GO:0003723);	cytoplasm (GO:0005737);exosome (RNase complex) (GO:0000178);nuclear exosome (RNase complex) (GO:0000176);nucleolus (GO:0005730);nucleoplasm (GO:0005654);nucleus (GO:0005634);	Alternative splicing;Complete proteome;Cytoplasm;Exosome;Nucleus;Phosphoprotein;Reference proteome;RNA-binding;rRNA processing.;		-0.174011	0.550825	0.860654	1	33	40	36.5	EXOS1
Locus_101702_Transcript_1/1_Confidence_1.000_Length_499	499	Locus_101702_Transcript_1/1_Confidence_1.000_Length_499	499	Locus_101702_Transcript_1/1_Confidence_1.000_Length_499	499	A0A091L6M4	67.308	4.66e-13	A0A091L6M4_CATAU	Uncharacterized protein {ECO:0000313|EMBL:KFP50840.1}	No_KEGG	GO:0003723 \\ GO:0003964 \\	No_GOBP	RNA binding (GO:0003723);RNA-directed DNA polymerase activity (GO:0003964);	No_GOCC	Complete proteome {ECO:0000313|Proteomes:UP000053745}.;		-0.0728465	2.15525	0.941505	1	108	122	115	A0A091L6M4
Locus_10172_Transcript_2/3_Confidence_0.714_Length_5526	5526	Locus_10172_Transcript_2/3_Confidence_0.714_Length_5526	5526	Locus_10172_Transcript_2/3_Confidence_0.714_Length_5526	5526	O60346	88.446	0	PHLP1_HUMAN	PH domain leucine-rich repeat-containing protein phosphatase 1	hsa:23239	GO:0005829 \\ GO:0005634 \\ GO:0005886 \\ GO:0046872 \\ GO:0004721 \\ GO:0006915 \\ GO:0009649 \\ GO:0007173 \\ GO:0038095 \\ GO:0008543 \\ GO:0045087 \\ GO:0051898 \\ GO:0048011 \\ GO:0048015 \\ GO:0042981 \\ GO:0046328 \\ GO:0043408 \\ GO:1900744 \\ GO:0002667 \\	apoptotic process (GO:0006915);entrainment of circadian clock (GO:0009649);epidermal growth factor receptor signaling pathway (GO:0007173);Fc-epsilon receptor signaling pathway (GO:0038095);fibroblast growth factor receptor signaling pathway (GO:0008543);innate immune response (GO:0045087);negative regulation of protein kinase B signaling (GO:0051898);neurotrophin TRK receptor signaling pathway (…	metal ion binding (GO:0046872);phosphoprotein phosphatase activity (GO:0004721);	cytosol (GO:0005829);nucleus (GO:0005634);plasma membrane (GO:0005886);	Acetylation;Alternative splicing;Apoptosis;Cell membrane;Complete proteome;Cytoplasm;Hydrolase;Leucine-rich repeat;Manganese;Membrane;Metal-binding;Nucleus;Polymorphism;Protein phosphatase;Reference proteome;Repeat;Tumor suppressor.;		-0.0186789	5.33345	0.983467	1	1012	1101	1056.5	PHLP1
Locus_101737_Transcript_1/1_Confidence_1.000_Length_221	221	No_sig_nr_hit	No_sig_nr_hit	No_sig_nr_hit	No_sig_nr_hit	No_Uniprotmatch	No_%_identity	No_evalue	No_ID	No_Description	No_KEGG	No_GO	No_GOCC	No_GOBP	No_GOMF	No_keywords		0.015345	-0.504455	1	1	16	17	16.5	No
Locus_101739_Transcript_1/1_Confidence_1.000_Length_660	660	No_sig_nr_hit	No_sig_nr_hit	No_sig_nr_hit	No_sig_nr_hit	No_Uniprotmatch	No_%_identity	No_evalue	No_ID	No_Description	No_KEGG	No_GO	No_GOCC	No_GOBP	No_GOMF	No_keywords		-0.242555	-0.857618	0.820975	1	11	14	12.5	No
Locus_10174_Transcript_1/6_Confidence_0.538_Length_3296	3296	Locus_10174_Transcript_1/6_Confidence_0.538_Length_3296	3296	Locus_10174_Transcript_1/6_Confidence_0.538_Length_3296	3296	P63149	100	3.73e-99	UBE2B_RAT	Ubiquitin-conjugating enzyme E2 B	rno:81816	GO:0005737 \\ GO:0033503 \\ GO:0000790 \\ GO:0005886 \\ GO:0005524 \\ GO:0061630 \\ GO:0031625 \\ GO:0004842 \\ GO:0032869 \\ GO:0006281 \\ GO:0016574 \\ GO:0043161 \\ GO:0070979 \\ GO:0070936 \\ GO:0070534 \\ GO:0000209 \\ GO:0001666 \\ GO:0006511 \\	cellular response to insulin stimulus (GO:0032869);DNA repair (GO:0006281);histone ubiquitination (GO:0016574);proteasome-mediated ubiquitin-dependent protein catabolic process (GO:0043161);protein K11-linked ubiquitination (GO:0070979);protein K48-linked ubiquitination (GO:0070936);protein K63-linked ubiquitination (GO:0070534);protein polyubiquitination (GO:0000209);response to hypoxia (GO:0001…	ATP binding (GO:0005524);ubiquitin protein ligase activity (GO:0061630);ubiquitin protein ligase binding (GO:0031625);ubiquitin-protein transferase activity (GO:0004842);	cytoplasm (GO:0005737);HULC complex (GO:0033503);nuclear chromatin (GO:0000790);plasma membrane (GO:0005886);	ATP-binding;Cell membrane;Complete proteome;DNA damage;DNA repair;Membrane;Nucleotide-binding;Nucleus;Reference proteome;Transferase;Ubl conjugation pathway.;		-0.00889835	7.0643	0.991876	1	3375	3647	3511	UBE2B
Locus_10174_Transcript_3/6_Confidence_0.154_Length_1076	1076	No_sig_nr_hit	No_sig_nr_hit	No_sig_nr_hit	No_sig_nr_hit	No_Uniprotmatch	No_%_identity	No_evalue	No_ID	No_Description	No_KEGG	No_GO	No_GOCC	No_GOBP	No_GOMF	No_keywords		0.227218	-0.0680885	0.841097	1	24	22	23	No
Locus_10174_Transcript_4/6_Confidence_0.308_Length_956	956	Locus_10174_Transcript_4/6_Confidence_0.308_Length_956	956	Locus_10174_Transcript_4/6_Confidence_0.308_Length_956	956	P63149	98.23	8.3e-76	UBE2B_RAT	Ubiquitin-conjugating enzyme E2 B	rno:81816	GO:0005737 \\ GO:0033503 \\ GO:0000790 \\ GO:0005886 \\ GO:0005524 \\ GO:0061630 \\ GO:0031625 \\ GO:0004842 \\ GO:0032869 \\ GO:0006281 \\ GO:0016574 \\ GO:0043161 \\ GO:0070979 \\ GO:0070936 \\ GO:0070534 \\ GO:0000209 \\ GO:0001666 \\ GO:0006511 \\	cellular response to insulin stimulus (GO:0032869);DNA repair (GO:0006281);histone ubiquitination (GO:0016574);proteasome-mediated ubiquitin-dependent protein catabolic process (GO:0043161);protein K11-linked ubiquitination (GO:0070979);protein K48-linked ubiquitination (GO:0070936);protein K63-linked ubiquitination (GO:0070534);protein polyubiquitination (GO:0000209);response to hypoxia (GO:0001…	ATP binding (GO:0005524);ubiquitin protein ligase activity (GO:0061630);ubiquitin protein ligase binding (GO:0031625);ubiquitin-protein transferase activity (GO:0004842);	cytoplasm (GO:0005737);HULC complex (GO:0033503);nuclear chromatin (GO:0000790);plasma membrane (GO:0005886);	ATP-binding;Cell membrane;Complete proteome;DNA damage;DNA repair;Membrane;Nucleotide-binding;Nucleus;Reference proteome;Transferase;Ubl conjugation pathway.;		-0.100412	3.37178	0.908884	1	251	289	270	UBE2B
Locus_10174_Transcript_5/6_Confidence_0.462_Length_3612	3612	Locus_10174_Transcript_5/6_Confidence_0.462_Length_3612	3612	Locus_10174_Transcript_5/6_Confidence_0.462_Length_3612	3612	P63149	87.209	1.34e-38	UBE2B_RAT	Ubiquitin-conjugating enzyme E2 B	rno:81816	GO:0005737 \\ GO:0033503 \\ GO:0000790 \\ GO:0005886 \\ GO:0005524 \\ GO:0061630 \\ GO:0031625 \\ GO:0004842 \\ GO:0032869 \\ GO:0006281 \\ GO:0016574 \\ GO:0043161 \\ GO:0070979 \\ GO:0070936 \\ GO:0070534 \\ GO:0000209 \\ GO:0001666 \\ GO:0006511 \\	cellular response to insulin stimulus (GO:0032869);DNA repair (GO:0006281);histone ubiquitination (GO:0016574);proteasome-mediated ubiquitin-dependent protein catabolic process (GO:0043161);protein K11-linked ubiquitination (GO:0070979);protein K48-linked ubiquitination (GO:0070936);protein K63-linked ubiquitination (GO:0070534);protein polyubiquitination (GO:0000209);response to hypoxia (GO:0001…	ATP binding (GO:0005524);ubiquitin protein ligase activity (GO:0061630);ubiquitin protein ligase binding (GO:0031625);ubiquitin-protein transferase activity (GO:0004842);	cytoplasm (GO:0005737);HULC complex (GO:0033503);nuclear chromatin (GO:0000790);plasma membrane (GO:0005886);	ATP-binding;Cell membrane;Complete proteome;DNA damage;DNA repair;Membrane;Nucleotide-binding;Nucleus;Reference proteome;Transferase;Ubl conjugation pathway.;		0.0535907	7.00353	0.949134	1	3306	3421	3363.5	UBE2B
Locus_10175_Transcript_1/2_Confidence_0.750_Length_2985	2985	Locus_10175_Transcript_1/2_Confidence_0.750_Length_2985	2985	Locus_10175_Transcript_1/2_Confidence_0.750_Length_2985	2985	P32250	93.399	0	LPAR6_CHICK	Lysophosphatidic acid receptor 6	No_KEGG	GO:0016021 \\ GO:0005886 \\ GO:0004930 \\	No_GOBP	G-protein coupled receptor activity (GO:0004930);	integral component of membrane (GO:0016021);plasma membrane (GO:0005886);	Cell membrane;Complete proteome;Disulfide bond;G-protein coupled receptor;Glycoprotein;Lipoprotein;Membrane;Palmitate;Receptor;Reference proteome;Transducer;Transmembrane;Transmembrane helix.;		0.0692708	1.74639	0.953458	1	85	87	86	LPAR6
Locus_10175_Transcript_2/2_Confidence_0.750_Length_2873	2873	Locus_10175_Transcript_2/2_Confidence_0.750_Length_2873	2873	Locus_10175_Transcript_2/2_Confidence_0.750_Length_2873	2873	P32250	93.399	0	LPAR6_CHICK	Lysophosphatidic acid receptor 6	No_KEGG	GO:0016021 \\ GO:0005886 \\ GO:0004930 \\	No_GOBP	G-protein coupled receptor activity (GO:0004930);	integral component of membrane (GO:0016021);plasma membrane (GO:0005886);	Cell membrane;Complete proteome;Disulfide bond;G-protein coupled receptor;Glycoprotein;Lipoprotein;Membrane;Palmitate;Receptor;Reference proteome;Transducer;Transmembrane;Transmembrane helix.;		-0.0463536	1.19226	0.977356	1	55	61	58	LPAR6
Locus_10176_Transcript_2/8_Confidence_0.182_Length_1424	1424	Locus_10176_Transcript_2/8_Confidence_0.182_Length_1424	1424	Locus_10176_Transcript_2/8_Confidence_0.182_Length_1424	1424	P29350	81.734	0	PTN6_HUMAN	Tyrosine-protein phosphatase non-receptor type 6	hsa:5777	GO:0042105 \\ GO:0005911 \\ GO:0005737 \\ GO:0005829 \\ GO:0070062 \\ GO:0016020 \\ GO:0005730 \\ GO:0005634 \\ GO:0019901 \\ GO:0004725 \\ GO:0005001 \\ GO:0033277 \\ GO:0006915 \\ GO:0050853 \\ GO:0007596 \\ GO:0030154 \\ GO:0008283 \\ GO:0019221 \\ GO:0007186 \\ GO:0060333 \\ GO:0060397 \\ GO:0050900 \\ GO:0035855 \\ GO:0042267 \\ GO:0050859 \\ GO:0008285 \\ GO:0002924 \\ GO:0043407 \\ GO:0050…	abortive mitotic cell cycle (GO:0033277);apoptotic process (GO:0006915);B cell receptor signaling pathway (GO:0050853);blood coagulation (GO:0007596);cell differentiation (GO:0030154);cell proliferation (GO:0008283);cytokine-mediated signaling pathway (GO:0019221);G-protein coupled receptor signaling pathway (GO:0007186);interferon-gamma-mediated signaling pathway (GO:0060333);JAK-STAT cascade in…	protein kinase binding (GO:0019901);protein tyrosine phosphatase activity (GO:0004725);transmembrane receptor protein tyrosine phosphatase activity (GO:0005001);	alpha-beta T cell receptor complex (GO:0042105);cell-cell junction (GO:0005911);cytoplasm (GO:0005737);cytosol (GO:0005829);extracellular exosome (GO:0070062);membrane (GO:0016020);nucleolus (GO:0005730);nucleus (GO:0005634);	3D-structure;Alternative splicing;Complete proteome;Cytoplasm;Hydrolase;Nucleus;Phosphoprotein;Protein phosphatase;Reference proteome;Repeat;SH2 domain.;		-0.0341725	-1.07037	1	1	10	11	10.5	PTN6
Locus_10176_Transcript_3/8_Confidence_0.636_Length_2722	2722	Locus_10176_Transcript_3/8_Confidence_0.636_Length_2722	2722	Locus_10176_Transcript_3/8_Confidence_0.636_Length_2722	2722	P29350	81.436	0	PTN6_HUMAN	Tyrosine-protein phosphatase non-receptor type 6	hsa:5777	GO:0042105 \\ GO:0005911 \\ GO:0005737 \\ GO:0005829 \\ GO:0070062 \\ GO:0016020 \\ GO:0005730 \\ GO:0005634 \\ GO:0019901 \\ GO:0004725 \\ GO:0005001 \\ GO:0033277 \\ GO:0006915 \\ GO:0050853 \\ GO:0007596 \\ GO:0030154 \\ GO:0008283 \\ GO:0019221 \\ GO:0007186 \\ GO:0060333 \\ GO:0060397 \\ GO:0050900 \\ GO:0035855 \\ GO:0042267 \\ GO:0050859 \\ GO:0008285 \\ GO:0002924 \\ GO:0043407 \\ GO:0050…	abortive mitotic cell cycle (GO:0033277);apoptotic process (GO:0006915);B cell receptor signaling pathway (GO:0050853);blood coagulation (GO:0007596);cell differentiation (GO:0030154);cell proliferation (GO:0008283);cytokine-mediated signaling pathway (GO:0019221);G-protein coupled receptor signaling pathway (GO:0007186);interferon-gamma-mediated signaling pathway (GO:0060333);JAK-STAT cascade in…	protein kinase binding (GO:0019901);protein tyrosine phosphatase activity (GO:0004725);transmembrane receptor protein tyrosine phosphatase activity (GO:0005001);	alpha-beta T cell receptor complex (GO:0042105);cell-cell junction (GO:0005911);cytoplasm (GO:0005737);cytosol (GO:0005829);extracellular exosome (GO:0070062);membrane (GO:0016020);nucleolus (GO:0005730);nucleus (GO:0005634);	3D-structure;Alternative splicing;Complete proteome;Cytoplasm;Hydrolase;Nucleus;Phosphoprotein;Protein phosphatase;Reference proteome;Repeat;SH2 domain.;		0.0482488	0.119336	1	1	26	27	26.5	PTN6
Locus_10176_Transcript_4/8_Confidence_0.591_Length_2088	2088	Locus_10176_Transcript_4/8_Confidence_0.591_Length_2088	2088	Locus_10176_Transcript_4/8_Confidence_0.591_Length_2088	2088	P29350	80.387	0	PTN6_HUMAN	Tyrosine-protein phosphatase non-receptor type 6	hsa:5777	GO:0042105 \\ GO:0005911 \\ GO:0005737 \\ GO:0005829 \\ GO:0070062 \\ GO:0016020 \\ GO:0005730 \\ GO:0005634 \\ GO:0019901 \\ GO:0004725 \\ GO:0005001 \\ GO:0033277 \\ GO:0006915 \\ GO:0050853 \\ GO:0007596 \\ GO:0030154 \\ GO:0008283 \\ GO:0019221 \\ GO:0007186 \\ GO:0060333 \\ GO:0060397 \\ GO:0050900 \\ GO:0035855 \\ GO:0042267 \\ GO:0050859 \\ GO:0008285 \\ GO:0002924 \\ GO:0043407 \\ GO:0050…	abortive mitotic cell cycle (GO:0033277);apoptotic process (GO:0006915);B cell receptor signaling pathway (GO:0050853);blood coagulation (GO:0007596);cell differentiation (GO:0030154);cell proliferation (GO:0008283);cytokine-mediated signaling pathway (GO:0019221);G-protein coupled receptor signaling pathway (GO:0007186);interferon-gamma-mediated signaling pathway (GO:0060333);JAK-STAT cascade in…	protein kinase binding (GO:0019901);protein tyrosine phosphatase activity (GO:0004725);transmembrane receptor protein tyrosine phosphatase activity (GO:0005001);	alpha-beta T cell receptor complex (GO:0042105);cell-cell junction (GO:0005911);cytoplasm (GO:0005737);cytosol (GO:0005829);extracellular exosome (GO:0070062);membrane (GO:0016020);nucleolus (GO:0005730);nucleus (GO:0005634);	3D-structure;Alternative splicing;Complete proteome;Cytoplasm;Hydrolase;Nucleus;Phosphoprotein;Protein phosphatase;Reference proteome;Repeat;SH2 domain.;		-0.206489	0.190803	0.866658	1	25	31	28	PTN6
Locus_10176_Transcript_5/8_Confidence_0.636_Length_2585	2585	Locus_10176_Transcript_5/8_Confidence_0.636_Length_2585	2585	Locus_10176_Transcript_5/8_Confidence_0.636_Length_2585	2585	P29350	80.438	0	PTN6_HUMAN	Tyrosine-protein phosphatase non-receptor type 6	hsa:5777	GO:0042105 \\ GO:0005911 \\ GO:0005737 \\ GO:0005829 \\ GO:0070062 \\ GO:0016020 \\ GO:0005730 \\ GO:0005634 \\ GO:0019901 \\ GO:0004725 \\ GO:0005001 \\ GO:0033277 \\ GO:0006915 \\ GO:0050853 \\ GO:0007596 \\ GO:0030154 \\ GO:0008283 \\ GO:0019221 \\ GO:0007186 \\ GO:0060333 \\ GO:0060397 \\ GO:0050900 \\ GO:0035855 \\ GO:0042267 \\ GO:0050859 \\ GO:0008285 \\ GO:0002924 \\ GO:0043407 \\ GO:0050…	abortive mitotic cell cycle (GO:0033277);apoptotic process (GO:0006915);B cell receptor signaling pathway (GO:0050853);blood coagulation (GO:0007596);cell differentiation (GO:0030154);cell proliferation (GO:0008283);cytokine-mediated signaling pathway (GO:0019221);G-protein coupled receptor signaling pathway (GO:0007186);interferon-gamma-mediated signaling pathway (GO:0060333);JAK-STAT cascade in…	protein kinase binding (GO:0019901);protein tyrosine phosphatase activity (GO:0004725);transmembrane receptor protein tyrosine phosphatase activity (GO:0005001);	alpha-beta T cell receptor complex (GO:0042105);cell-cell junction (GO:0005911);cytoplasm (GO:0005737);cytosol (GO:0005829);extracellular exosome (GO:0070062);membrane (GO:0016020);nucleolus (GO:0005730);nucleus (GO:0005634);	3D-structure;Alternative splicing;Complete proteome;Cytoplasm;Hydrolase;Nucleus;Phosphoprotein;Protein phosphatase;Reference proteome;Repeat;SH2 domain.;		0.629773	-0.123468	0.528342	1	26	18	22	PTN6
Locus_10176_Transcript_6/8_Confidence_0.636_Length_2897	2897	Locus_10176_Transcript_6/8_Confidence_0.636_Length_2897	2897	Locus_10176_Transcript_6/8_Confidence_0.636_Length_2897	2897	P29350	77.574	0	PTN6_HUMAN	Tyrosine-protein phosphatase non-receptor type 6	hsa:5777	GO:0042105 \\ GO:0005911 \\ GO:0005737 \\ GO:0005829 \\ GO:0070062 \\ GO:0016020 \\ GO:0005730 \\ GO:0005634 \\ GO:0019901 \\ GO:0004725 \\ GO:0005001 \\ GO:0033277 \\ GO:0006915 \\ GO:0050853 \\ GO:0007596 \\ GO:0030154 \\ GO:0008283 \\ GO:0019221 \\ GO:0007186 \\ GO:0060333 \\ GO:0060397 \\ GO:0050900 \\ GO:0035855 \\ GO:0042267 \\ GO:0050859 \\ GO:0008285 \\ GO:0002924 \\ GO:0043407 \\ GO:0050…	abortive mitotic cell cycle (GO:0033277);apoptotic process (GO:0006915);B cell receptor signaling pathway (GO:0050853);blood coagulation (GO:0007596);cell differentiation (GO:0030154);cell proliferation (GO:0008283);cytokine-mediated signaling pathway (GO:0019221);G-protein coupled receptor signaling pathway (GO:0007186);interferon-gamma-mediated signaling pathway (GO:0060333);JAK-STAT cascade in…	protein kinase binding (GO:0019901);protein tyrosine phosphatase activity (GO:0004725);transmembrane receptor protein tyrosine phosphatase activity (GO:0005001);	alpha-beta T cell receptor complex (GO:0042105);cell-cell junction (GO:0005911);cytoplasm (GO:0005737);cytosol (GO:0005829);extracellular exosome (GO:0070062);membrane (GO:0016020);nucleolus (GO:0005730);nucleus (GO:0005634);	3D-structure;Alternative splicing;Complete proteome;Cytoplasm;Hydrolase;Nucleus;Phosphoprotein;Protein phosphatase;Reference proteome;Repeat;SH2 domain.;		0.335114	-0.35373	0.74563	1	20	17	18.5	PTN6
Locus_10176_Transcript_7/8_Confidence_0.318_Length_1548	1548	Locus_10176_Transcript_7/8_Confidence_0.318_Length_1548	1548	Locus_10176_Transcript_7/8_Confidence_0.318_Length_1548	1548	P29350	75.221	7.61e-42	PTN6_HUMAN	Tyrosine-protein phosphatase non-receptor type 6	hsa:5777	GO:0042105 \\ GO:0005911 \\ GO:0005737 \\ GO:0005829 \\ GO:0070062 \\ GO:0016020 \\ GO:0005730 \\ GO:0005634 \\ GO:0019901 \\ GO:0004725 \\ GO:0005001 \\ GO:0033277 \\ GO:0006915 \\ GO:0050853 \\ GO:0007596 \\ GO:0030154 \\ GO:0008283 \\ GO:0019221 \\ GO:0007186 \\ GO:0060333 \\ GO:0060397 \\ GO:0050900 \\ GO:0035855 \\ GO:0042267 \\ GO:0050859 \\ GO:0008285 \\ GO:0002924 \\ GO:0043407 \\ GO:0050…	abortive mitotic cell cycle (GO:0033277);apoptotic process (GO:0006915);B cell receptor signaling pathway (GO:0050853);blood coagulation (GO:0007596);cell differentiation (GO:0030154);cell proliferation (GO:0008283);cytokine-mediated signaling pathway (GO:0019221);G-protein coupled receptor signaling pathway (GO:0007186);interferon-gamma-mediated signaling pathway (GO:0060333);JAK-STAT cascade in…	protein kinase binding (GO:0019901);protein tyrosine phosphatase activity (GO:0004725);transmembrane receptor protein tyrosine phosphatase activity (GO:0005001);	alpha-beta T cell receptor complex (GO:0042105);cell-cell junction (GO:0005911);cytoplasm (GO:0005737);cytosol (GO:0005829);extracellular exosome (GO:0070062);membrane (GO:0016020);nucleolus (GO:0005730);nucleus (GO:0005634);	3D-structure;Alternative splicing;Complete proteome;Cytoplasm;Hydrolase;Nucleus;Phosphoprotein;Protein phosphatase;Reference proteome;Repeat;SH2 domain.;		0.101768	-1.01298	1	1	11	11	11	PTN6
Locus_10176_Transcript_8/8_Confidence_0.636_Length_2616	2616	Locus_10176_Transcript_8/8_Confidence_0.636_Length_2616	2616	Locus_10176_Transcript_8/8_Confidence_0.636_Length_2616	2616	P29350	80.537	0	PTN6_HUMAN	Tyrosine-protein phosphatase non-receptor type 6	hsa:5777	GO:0042105 \\ GO:0005911 \\ GO:0005737 \\ GO:0005829 \\ GO:0070062 \\ GO:0016020 \\ GO:0005730 \\ GO:0005634 \\ GO:0019901 \\ GO:0004725 \\ GO:0005001 \\ GO:0033277 \\ GO:0006915 \\ GO:0050853 \\ GO:0007596 \\ GO:0030154 \\ GO:0008283 \\ GO:0019221 \\ GO:0007186 \\ GO:0060333 \\ GO:0060397 \\ GO:0050900 \\ GO:0035855 \\ GO:0042267 \\ GO:0050859 \\ GO:0008285 \\ GO:0002924 \\ GO:0043407 \\ GO:0050…	abortive mitotic cell cycle (GO:0033277);apoptotic process (GO:0006915);B cell receptor signaling pathway (GO:0050853);blood coagulation (GO:0007596);cell differentiation (GO:0030154);cell proliferation (GO:0008283);cytokine-mediated signaling pathway (GO:0019221);G-protein coupled receptor signaling pathway (GO:0007186);interferon-gamma-mediated signaling pathway (GO:0060333);JAK-STAT cascade in…	protein kinase binding (GO:0019901);protein tyrosine phosphatase activity (GO:0004725);transmembrane receptor protein tyrosine phosphatase activity (GO:0005001);	alpha-beta T cell receptor complex (GO:0042105);cell-cell junction (GO:0005911);cytoplasm (GO:0005737);cytosol (GO:0005829);extracellular exosome (GO:0070062);membrane (GO:0016020);nucleolus (GO:0005730);nucleus (GO:0005634);	3D-structure;Alternative splicing;Complete proteome;Cytoplasm;Hydrolase;Nucleus;Phosphoprotein;Protein phosphatase;Reference proteome;Repeat;SH2 domain.;		-0.190115	0.473729	0.853272	1	31	38	34.5	PTN6
Locus_10178_Transcript_1/1_Confidence_1.000_Length_4229	4229	Locus_10178_Transcript_1/1_Confidence_1.000_Length_4229	4229	Locus_10178_Transcript_1/1_Confidence_1.000_Length_4229	4229	Q3UQ28	79.913	0	PXDN_MOUSE	Peroxidasin homolog	mmu:69675	GO:0005783 \\ GO:0070062 \\ GO:0031012 \\ GO:0005615 \\ GO:0005578 \\ GO:0005201 \\ GO:0020037 \\ GO:0046872 \\ GO:0004601 \\ GO:0098869 \\ GO:0030198 \\ GO:0042744 \\ GO:0055114 \\ GO:0006979 \\	cellular oxidant detoxification (GO:0098869);extracellular matrix organization (GO:0030198);hydrogen peroxide catabolic process (GO:0042744);oxidation-reduction process (GO:0055114);response to oxidative stress (GO:0006979);	extracellular matrix structural constituent (GO:0005201);heme binding (GO:0020037);metal ion binding (GO:0046872);peroxidase activity (GO:0004601);	endoplasmic reticulum (GO:0005783);extracellular exosome (GO:0070062);extracellular matrix (GO:0031012);extracellular space (GO:0005615);proteinaceous extracellular matrix (GO:0005578);	Calcium;Complete proteome;Disulfide bond;Extracellular matrix;Glycoprotein;Heme;Hydrogen peroxide;Immunoglobulin domain;Iron;Leucine-rich repeat;Metal-binding;Oxidoreductase;Peroxidase;Phosphoprotein;Reference proteome;Repeat;Secreted;Signal.;		0.24724	4.01126	0.771359	1	441	399	420	PXDN
Locus_10179_Transcript_2/3_Confidence_0.667_Length_4029	4029	Locus_10179_Transcript_2/3_Confidence_0.667_Length_4029	4029	Locus_10179_Transcript_2/3_Confidence_0.667_Length_4029	4029	Q5F336	87.956	1.61e-164	MBLC2_CHICK	Metallo-beta-lactamase domain-containing protein 2	gga:431565	GO:0070062 \\ GO:0016787 \\ GO:0046872 \\	No_GOBP	hydrolase activity (GO:0016787);metal ion binding (GO:0046872);	extracellular exosome (GO:0070062);	Complete proteome;Hydrolase;Metal-binding;Reference proteome;Zinc.;		0.0930056	4.47986	0.912874	1	581	585	583	MBLC2
Locus_1018_Transcript_4/7_Confidence_0.647_Length_2567	2567	No_sig_nr_hit	No_sig_nr_hit	No_sig_nr_hit	No_sig_nr_hit	No_Uniprotmatch	No_%_identity	No_evalue	No_ID	No_Description	No_KEGG	No_GO	No_GOCC	No_GOBP	No_GOMF	No_keywords		-0.0341725	-1.07037	1	1	10	11	10.5	No
Locus_1018_Transcript_6/7_Confidence_0.176_Length_989	989	No_sig_nr_hit	No_sig_nr_hit	No_sig_nr_hit	No_sig_nr_hit	No_Uniprotmatch	No_%_identity	No_evalue	No_ID	No_Description	No_KEGG	No_GO	No_GOCC	No_GOBP	No_GOMF	No_keywords		-2.40216	0.549788	0.0138529	1	11	63	37	No
Locus_10185_Transcript_1/6_Confidence_0.667_Length_6122	6122	Locus_10185_Transcript_1/6_Confidence_0.667_Length_6122	6122	Locus_10185_Transcript_1/6_Confidence_0.667_Length_6122	6122	Q9NWN3	58.184	0	FBX34_HUMAN	F-box only protein 34	hsa:55030	GO:0005737 \\ GO:0005654 \\	No_GOBP	No_GOMF	cytoplasm (GO:0005737);nucleoplasm (GO:0005654);	Complete proteome;Polymorphism;Reference proteome;Ubl conjugation pathway.;		-0.0866881	4.10308	0.920519	1	420	479	449.5	FBX34
Locus_10185_Transcript_2/6_Confidence_0.600_Length_6274	6274	Locus_10185_Transcript_2/6_Confidence_0.600_Length_6274	6274	Locus_10185_Transcript_2/6_Confidence_0.600_Length_6274	6274	Q9NWN3	58.184	0	FBX34_HUMAN	F-box only protein 34	hsa:55030	GO:0005737 \\ GO:0005654 \\	No_GOBP	No_GOMF	cytoplasm (GO:0005737);nucleoplasm (GO:0005654);	Complete proteome;Polymorphism;Reference proteome;Ubl conjugation pathway.;		-0.0461194	4.15247	0.958623	1	441	489	465	FBX34
Locus_10187_Transcript_6/10_Confidence_0.375_Length_2887	2887	Locus_10187_Transcript_6/10_Confidence_0.375_Length_2887	2887	Locus_10187_Transcript_6/10_Confidence_0.375_Length_2887	2887	Q5SUV2	44.309	2.03e-174	MYBPP_MOUSE	MYCBP-associated protein	mmu:104601	GO:0005737 \\ GO:0016020 \\ GO:0030154 \\ GO:0007275 \\ GO:0007283 \\ GO:0007268 \\	cell differentiation (GO:0030154);multicellular organismal development (GO:0007275);spermatogenesis (GO:0007283);synaptic transmission (GO:0007268);	No_GOMF	cytoplasm (GO:0005737);membrane (GO:0016020);	Alternative splicing;Complete proteome;Cytoplasm;Developmental protein;Differentiation;Membrane;Phosphoprotein;Reference proteome;Spermatogenesis.;		-0.354144	-0.324625	0.812306	1	16	22	19	MYBPP
Locus_10187_Transcript_8/10_Confidence_0.625_Length_3349	3349	Locus_10187_Transcript_8/10_Confidence_0.625_Length_3349	3349	Locus_10187_Transcript_8/10_Confidence_0.625_Length_3349	3349	Q5SUV2	44.309	7.65e-173	MYBPP_MOUSE	MYCBP-associated protein	mmu:104601	GO:0005737 \\ GO:0016020 \\ GO:0030154 \\ GO:0007275 \\ GO:0007283 \\ GO:0007268 \\	cell differentiation (GO:0030154);multicellular organismal development (GO:0007275);spermatogenesis (GO:0007283);synaptic transmission (GO:0007268);	No_GOMF	cytoplasm (GO:0005737);membrane (GO:0016020);	Alternative splicing;Complete proteome;Cytoplasm;Developmental protein;Differentiation;Membrane;Phosphoprotein;Reference proteome;Spermatogenesis.;		0.0482488	0.119336	1	1	26	27	26.5	MYBPP
Locus_10187_Transcript_9/10_Confidence_0.458_Length_3649	3649	Locus_10187_Transcript_9/10_Confidence_0.458_Length_3649	3649	Locus_10187_Transcript_9/10_Confidence_0.458_Length_3649	3649	Q8TBZ2	41.691	2.66e-146	MYBPP_HUMAN	MYCBP-associated protein	hsa:84073	GO:0005737 \\ GO:0016020 \\ GO:0030154 \\ GO:0007275 \\ GO:0007283 \\ GO:0007268 \\	cell differentiation (GO:0030154);multicellular organismal development (GO:0007275);spermatogenesis (GO:0007283);synaptic transmission (GO:0007268);	No_GOMF	cytoplasm (GO:0005737);membrane (GO:0016020);	Complete proteome;Cytoplasm;Developmental protein;Differentiation;Membrane;Phosphoprotein;Polymorphism;Reference proteome;Spermatogenesis.;		0.335114	-0.35373	0.74563	1	20	17	18.5	MYBPP
Locus_10189_Transcript_1/1_Confidence_1.000_Length_3861	3861	Locus_10189_Transcript_1/1_Confidence_1.000_Length_3861	3861	Locus_10189_Transcript_1/1_Confidence_1.000_Length_3861	3861	O60285	84.652	0	NUAK1_HUMAN	NUAK family SNF1-like kinase 1	hsa:9891	GO:0005737 \\ GO:0015630 \\ GO:0005730 \\ GO:0005634 \\ GO:0005524 \\ GO:0046872 \\ GO:0002039 \\ GO:0004674 \\ GO:0007155 \\ GO:0006974 \\ GO:0035556 \\ GO:0006468 \\ GO:0030155 \\ GO:0042127 \\ GO:2000772 \\ GO:0035507 \\	cell adhesion (GO:0007155);cellular response to DNA damage stimulus (GO:0006974);intracellular signal transduction (GO:0035556);protein phosphorylation (GO:0006468);regulation of cell adhesion (GO:0030155);regulation of cell proliferation (GO:0042127);regulation of cellular senescence (GO:2000772);regulation of myosin-light-chain-phosphatase activity (GO:0035507);	ATP binding (GO:0005524);metal ion binding (GO:0046872);p53 binding (GO:0002039);protein serine/threonine kinase activity (GO:0004674);	cytoplasm (GO:0005737);microtubule cytoskeleton (GO:0015630);nucleolus (GO:0005730);nucleus (GO:0005634);	Acetylation;Alternative splicing;ATP-binding;Cell adhesion;Complete proteome;Cytoplasm;DNA damage;Kinase;Magnesium;Metal-binding;Nucleotide-binding;Nucleus;Phosphoprotein;Polymorphism;Reference proteome;Serine/threonine-protein kinase;Transferase;Ubl conjugation.;		0.0378253	5.59213	0.964937	1	1235	1292	1263.5	NUAK1
Locus_101890_Transcript_1/1_Confidence_1.000_Length_666	666	No_sig_nr_hit	No_sig_nr_hit	No_sig_nr_hit	No_sig_nr_hit	No_Uniprotmatch	No_%_identity	No_evalue	No_ID	No_Description	No_KEGG	No_GO	No_GOCC	No_GOBP	No_GOMF	No_keywords		-0.651217	-0.433675	0.538841	1	13	22	17.5	No
Locus_1019_Transcript_1/5_Confidence_0.667_Length_6086	6086	Locus_1019_Transcript_1/5_Confidence_0.667_Length_6086	6086	Locus_1019_Transcript_1/5_Confidence_0.667_Length_6086	6086	O43795	93.398	0	MYO1B_HUMAN	Unconventional myosin-Ib	hsa:4430	GO:0005884 \\ GO:0005903 \\ GO:0071944 \\ GO:0005737 \\ GO:0005769 \\ GO:0010008 \\ GO:0070062 \\ GO:0030175 \\ GO:0016459 \\ GO:0048471 \\ GO:0005886 \\ GO:0051015 \\ GO:0030898 \\ GO:0005524 \\ GO:0000146 \\ GO:0005547 \\ GO:0005546 \\ GO:0051017 \\ GO:0007015 \\ GO:0030048 \\ GO:0006892 \\	actin filament bundle assembly (GO:0051017);actin filament organization (GO:0007015);actin filament-based movement (GO:0030048);post-Golgi vesicle-mediated transport (GO:0006892);	actin filament binding (GO:0051015);actin-dependent ATPase activity (GO:0030898);ATP binding (GO:0005524);microfilament motor activity (GO:0000146);phosphatidylinositol-3,4,5-trisphosphate binding (GO:0005547);phosphatidylinositol-4,5-bisphosphate binding (GO:0005546);	actin filament (GO:0005884);brush border (GO:0005903);cell periphery (GO:0071944);cytoplasm (GO:0005737);early endosome (GO:0005769);endosome membrane (GO:0010008);extracellular exosome (GO:0070062);filopodium (GO:0030175);myosin complex (GO:0016459);perinuclear region of cytoplasm (GO:0048471);plasma membrane (GO:0005886);	Actin-binding;Alternative splicing;ATP-binding;Calmodulin-binding;Complete proteome;Isopeptide bond;Motor protein;Myosin;Nucleotide-binding;Phosphoprotein;Polymorphism;Reference proteome;Repeat;Ubl conjugation.;		0.241722	1.69877	0.79325	1	87	79	83	MYO1B
Locus_1019_Transcript_4/5_Confidence_0.500_Length_5918	5918	Locus_1019_Transcript_4/5_Confidence_0.500_Length_5918	5918	Locus_1019_Transcript_4/5_Confidence_0.500_Length_5918	5918	P46735	89.811	0	MYO1B_MOUSE	Unconventional myosin-Ib	No_KEGG	GO:0005884 \\ GO:0005903 \\ GO:0071944 \\ GO:0005737 \\ GO:0005769 \\ GO:0010008 \\ GO:0070062 \\ GO:0030175 \\ GO:0016459 \\ GO:0048471 \\ GO:0005886 \\ GO:0051015 \\ GO:0005524 \\ GO:0000146 \\ GO:0005547 \\ GO:0005546 \\ GO:0051017 \\ GO:0007015 \\ GO:0030048 \\ GO:0006892 \\	actin filament bundle assembly (GO:0051017);actin filament organization (GO:0007015);actin filament-based movement (GO:0030048);post-Golgi vesicle-mediated transport (GO:0006892);	actin filament binding (GO:0051015);ATP binding (GO:0005524);microfilament motor activity (GO:0000146);phosphatidylinositol-3,4,5-trisphosphate binding (GO:0005547);phosphatidylinositol-4,5-bisphosphate binding (GO:0005546);	actin filament (GO:0005884);brush border (GO:0005903);cell periphery (GO:0071944);cytoplasm (GO:0005737);early endosome (GO:0005769);endosome membrane (GO:0010008);extracellular exosome (GO:0070062);filopodium (GO:0030175);myosin complex (GO:0016459);perinuclear region of cytoplasm (GO:0048471);plasma membrane (GO:0005886);	Actin-binding;Alternative splicing;ATP-binding;Calmodulin-binding;Complete proteome;Isopeptide bond;Motor protein;Myosin;Nucleotide-binding;Phosphoprotein;Reference proteome;Repeat;Ubl conjugation.;		-0.0629953	1.76081	0.953975	1	82	92	87	MYO1B
Locus_10190_Transcript_3/3_Confidence_0.714_Length_1480	1480	No_sig_nr_hit	No_sig_nr_hit	No_sig_nr_hit	No_sig_nr_hit	No_Uniprotmatch	No_%_identity	No_evalue	No_ID	No_Description	No_KEGG	No_GO	No_GOCC	No_GOBP	No_GOMF	No_keywords		0.53103	1.84046	0.544466	1	105	78	91.5	No
Locus_10191_Transcript_1/4_Confidence_0.667_Length_2748	2748	Locus_10191_Transcript_1/4_Confidence_0.667_Length_2748	2748	Locus_10191_Transcript_1/4_Confidence_0.667_Length_2748	2748	Q92963	92.857	3.83e-83	RIT1_HUMAN	GTP-binding protein Rit1	hsa:6016	GO:0005622 \\ GO:0005886 \\ GO:0005516 \\ GO:0005525 \\ GO:0048011 \\ GO:0007265 \\ GO:0007165 \\ GO:0007264 \\	neurotrophin TRK receptor signaling pathway (GO:0048011);Ras protein signal transduction (GO:0007265);signal transduction (GO:0007165);small GTPase mediated signal transduction (GO:0007264);	calmodulin binding (GO:0005516);GTP binding (GO:0005525);	intracellular (GO:0005622);plasma membrane (GO:0005886);	3D-structure;Alternative splicing;Cell membrane;Complete proteome;Disease mutation;GTP-binding;Membrane;Nucleotide-binding;Reference proteome.;		0.437351	2.28694	0.617598	1	140	111	125.5	RIT1
Locus_10191_Transcript_2/4_Confidence_0.556_Length_2894	2894	Locus_10191_Transcript_2/4_Confidence_0.556_Length_2894	2894	Locus_10191_Transcript_2/4_Confidence_0.556_Length_2894	2894	Q92963	95.025	5.77e-131	RIT1_HUMAN	GTP-binding protein Rit1	hsa:6016	GO:0005622 \\ GO:0005886 \\ GO:0005516 \\ GO:0005525 \\ GO:0048011 \\ GO:0007265 \\ GO:0007165 \\ GO:0007264 \\	neurotrophin TRK receptor signaling pathway (GO:0048011);Ras protein signal transduction (GO:0007265);signal transduction (GO:0007165);small GTPase mediated signal transduction (GO:0007264);	calmodulin binding (GO:0005516);GTP binding (GO:0005525);	intracellular (GO:0005622);plasma membrane (GO:0005886);	3D-structure;Alternative splicing;Cell membrane;Complete proteome;Disease mutation;GTP-binding;Membrane;Nucleotide-binding;Reference proteome.;		-0.196447	2.33283	0.824655	1	117	144	130.5	RIT1
Locus_10191_Transcript_3/4_Confidence_0.556_Length_2936	2936	Locus_10191_Transcript_3/4_Confidence_0.556_Length_2936	2936	Locus_10191_Transcript_3/4_Confidence_0.556_Length_2936	2936	Q92963	95.025	7.89e-131	RIT1_HUMAN	GTP-binding protein Rit1	hsa:6016	GO:0005622 \\ GO:0005886 \\ GO:0005516 \\ GO:0005525 \\ GO:0048011 \\ GO:0007265 \\ GO:0007165 \\ GO:0007264 \\	neurotrophin TRK receptor signaling pathway (GO:0048011);Ras protein signal transduction (GO:0007265);signal transduction (GO:0007165);small GTPase mediated signal transduction (GO:0007264);	calmodulin binding (GO:0005516);GTP binding (GO:0005525);	intracellular (GO:0005622);plasma membrane (GO:0005886);	3D-structure;Alternative splicing;Cell membrane;Complete proteome;Disease mutation;GTP-binding;Membrane;Nucleotide-binding;Reference proteome.;		0.0439929	2.50582	0.972371	1	144	150	147	RIT1
Locus_101931_Transcript_1/1_Confidence_1.000_Length_415	415	No_sig_nr_hit	No_sig_nr_hit	No_sig_nr_hit	No_sig_nr_hit	No_Uniprotmatch	No_%_identity	No_evalue	No_ID	No_Description	No_KEGG	No_GO	No_GOCC	No_GOBP	No_GOMF	No_keywords		-0.228707	0.305975	0.83589	1	27	34	30.5	No
Locus_10194_Transcript_1/2_Confidence_0.750_Length_1668	1668	Locus_10194_Transcript_1/2_Confidence_0.750_Length_1668	1668	Locus_10194_Transcript_1/2_Confidence_0.750_Length_1668	1668	O75521	64.721	8.44e-175	ECI2_HUMAN	Enoyl-CoA delta isomerase 2, mitochondrial	hsa:10455	GO:0043231 \\ GO:0016020 \\ GO:0005739 \\ GO:0005654 \\ GO:0005782 \\ GO:0004165 \\ GO:0000062 \\ GO:0005102 \\ GO:0006635 \\ GO:0009062 \\	fatty acid beta-oxidation (GO:0006635);fatty acid catabolic process (GO:0009062);	dodecenoyl-CoA delta-isomerase activity (GO:0004165);fatty-acyl-CoA binding (GO:0000062);receptor binding (GO:0005102);	intracellular membrane-bounded organelle (GO:0043231);membrane (GO:0016020);mitochondrion (GO:0005739);nucleoplasm (GO:0005654);peroxisomal matrix (GO:0005782);	3D-structure;Acetylation;Alternative splicing;Complete proteome;Isomerase;Mitochondrion;Peroxisome;Phosphoprotein;Polymorphism;Reference proteome;Transit peptide.;		0.0177383	7.90834	0.983229	1	6116	6488	6302	ECI2
Locus_101966_Transcript_1/1_Confidence_1.000_Length_243	243	No_sig_nr_hit	No_sig_nr_hit	No_sig_nr_hit	No_sig_nr_hit	No_Uniprotmatch	No_%_identity	No_evalue	No_ID	No_Description	No_KEGG	No_GO	No_GOCC	No_GOBP	No_GOMF	No_keywords		-0.158304	-1.01453	0.900044	1	10	12	11	No
Locus_102_Transcript_1/9_Confidence_0.636_Length_4551	4551	Locus_102_Transcript_1/9_Confidence_0.636_Length_4551	4551	Locus_102_Transcript_1/9_Confidence_0.636_Length_4551	4551	Q5RAS6	95.935	7.97e-73	COPT1_PONAB	High affinity copper uptake protein 1	pon:100172583	GO:0016021 \\ GO:0005886 \\ GO:0005375 \\	No_GOBP	copper ion transmembrane transporter activity (GO:0005375);	integral component of membrane (GO:0016021);plasma membrane (GO:0005886);	Cell membrane;Complete proteome;Copper;Copper transport;Glycoprotein;Ion transport;Membrane;Reference proteome;Transmembrane;Transmembrane helix;Transport.;		-0.0306319	2.44032	0.980745	1	134	147	140.5	COPT1
Locus_102_Transcript_3/9_Confidence_0.636_Length_4626	4626	Locus_102_Transcript_3/9_Confidence_0.636_Length_4626	4626	Locus_102_Transcript_3/9_Confidence_0.636_Length_4626	4626	Q8K211	89.172	6.97e-88	COPT1_MOUSE	High affinity copper uptake protein 1	mmu:20529	GO:0016021 \\ GO:0005770 \\ GO:0043025 \\ GO:0005886 \\ GO:0055037 \\ GO:0015088 \\ GO:0006878 \\ GO:0072719 \\ GO:0015677 \\ GO:1902861 \\ GO:0006855 \\	cellular copper ion homeostasis (GO:0006878);cellular response to cisplatin (GO:0072719);copper ion import (GO:0015677);copper ion import into cell (GO:1902861);drug transmembrane transport (GO:0006855);	copper uptake transmembrane transporter activity (GO:0015088);	integral component of membrane (GO:0016021);late endosome (GO:0005770);neuronal cell body (GO:0043025);plasma membrane (GO:0005886);recycling endosome (GO:0055037);	Cell membrane;Complete proteome;Copper;Copper transport;Glycoprotein;Ion transport;Membrane;Reference proteome;Transmembrane;Transmembrane helix;Transport.;		-0.186402	2.32753	0.83422	1	117	143	130	COPT1
Locus_102_Transcript_5/9_Confidence_0.636_Length_4729	4729	Locus_102_Transcript_5/9_Confidence_0.636_Length_4729	4729	Locus_102_Transcript_5/9_Confidence_0.636_Length_4729	4729	Q8K211	89.172	1.49e-87	COPT1_MOUSE	High affinity copper uptake protein 1	mmu:20529	GO:0016021 \\ GO:0005770 \\ GO:0043025 \\ GO:0005886 \\ GO:0055037 \\ GO:0015088 \\ GO:0006878 \\ GO:0072719 \\ GO:0015677 \\ GO:1902861 \\ GO:0006855 \\	cellular copper ion homeostasis (GO:0006878);cellular response to cisplatin (GO:0072719);copper ion import (GO:0015677);copper ion import into cell (GO:1902861);drug transmembrane transport (GO:0006855);	copper uptake transmembrane transporter activity (GO:0015088);	integral component of membrane (GO:0016021);late endosome (GO:0005770);neuronal cell body (GO:0043025);plasma membrane (GO:0005886);recycling endosome (GO:0055037);	Cell membrane;Complete proteome;Copper;Copper transport;Glycoprotein;Ion transport;Membrane;Reference proteome;Transmembrane;Transmembrane helix;Transport.;		-0.529281	2.4175	0.54423	1	109	169	139	COPT1
Locus_102_Transcript_6/9_Confidence_0.455_Length_4579	4579	Locus_102_Transcript_6/9_Confidence_0.455_Length_4579	4579	Locus_102_Transcript_6/9_Confidence_0.455_Length_4579	4579	Q8K211	89.172	5.85e-88	COPT1_MOUSE	High affinity copper uptake protein 1	mmu:20529	GO:0016021 \\ GO:0005770 \\ GO:0043025 \\ GO:0005886 \\ GO:0055037 \\ GO:0015088 \\ GO:0006878 \\ GO:0072719 \\ GO:0015677 \\ GO:1902861 \\ GO:0006855 \\	cellular copper ion homeostasis (GO:0006878);cellular response to cisplatin (GO:0072719);copper ion import (GO:0015677);copper ion import into cell (GO:1902861);drug transmembrane transport (GO:0006855);	copper uptake transmembrane transporter activity (GO:0015088);	integral component of membrane (GO:0016021);late endosome (GO:0005770);neuronal cell body (GO:0043025);plasma membrane (GO:0005886);recycling endosome (GO:0055037);	Cell membrane;Complete proteome;Copper;Copper transport;Glycoprotein;Ion transport;Membrane;Reference proteome;Transmembrane;Transmembrane helix;Transport.;		-0.234863	2.44727	0.800365	1	125	158	141.5	COPT1
Locus_1020_Transcript_1/5_Confidence_0.500_Length_2232	2232	Locus_1020_Transcript_1/5_Confidence_0.500_Length_2232	2232	Locus_1020_Transcript_1/5_Confidence_0.500_Length_2232	2232	P40241	67.805	6.38e-89	CD9_RAT	CD9 antigen	rno:24936	GO:0016324 \\ GO:0009986 \\ GO:0009897 \\ GO:0070062 \\ GO:0005615 \\ GO:0005925 \\ GO:0005887 \\ GO:0005178 \\ GO:0007420 \\ GO:0007155 \\ GO:0007166 \\ GO:0071404 \\ GO:0007342 \\ GO:0006928 \\ GO:0008285 \\ GO:0014003 \\ GO:0030913 \\ GO:0031623 \\ GO:0009414 \\	brain development (GO:0007420);cell adhesion (GO:0007155);cell surface receptor signaling pathway (GO:0007166);cellular response to low-density lipoprotein particle stimulus (GO:0071404);fusion of sperm to egg plasma membrane (GO:0007342);movement of cell or subcellular component (GO:0006928);negative regulation of cell proliferation (GO:0008285);oligodendrocyte development (GO:0014003);paranodal…	integrin binding (GO:0005178);	apical plasma membrane (GO:0016324);cell surface (GO:0009986);external side of plasma membrane (GO:0009897);extracellular exosome (GO:0070062);extracellular space (GO:0005615);focal adhesion (GO:0005925);integral component of plasma membrane (GO:0005887);	Cell adhesion;Complete proteome;Direct protein sequencing;Disulfide bond;Fertilization;Glycoprotein;Lipoprotein;Membrane;Palmitate;Reference proteome;Transmembrane;Transmembrane helix.;		0.420898	1.89939	0.635189	1	106	85	95.5	CD9
Locus_1020_Transcript_3/5_Confidence_0.667_Length_2365	2365	Locus_1020_Transcript_3/5_Confidence_0.667_Length_2365	2365	Locus_1020_Transcript_3/5_Confidence_0.667_Length_2365	2365	P40241	70.485	2.42e-106	CD9_RAT	CD9 antigen	rno:24936	GO:0016324 \\ GO:0009986 \\ GO:0009897 \\ GO:0070062 \\ GO:0005615 \\ GO:0005925 \\ GO:0005887 \\ GO:0005178 \\ GO:0007420 \\ GO:0007155 \\ GO:0007166 \\ GO:0071404 \\ GO:0007342 \\ GO:0006928 \\ GO:0008285 \\ GO:0014003 \\ GO:0030913 \\ GO:0031623 \\ GO:0009414 \\	brain development (GO:0007420);cell adhesion (GO:0007155);cell surface receptor signaling pathway (GO:0007166);cellular response to low-density lipoprotein particle stimulus (GO:0071404);fusion of sperm to egg plasma membrane (GO:0007342);movement of cell or subcellular component (GO:0006928);negative regulation of cell proliferation (GO:0008285);oligodendrocyte development (GO:0014003);paranodal…	integrin binding (GO:0005178);	apical plasma membrane (GO:0016324);cell surface (GO:0009986);external side of plasma membrane (GO:0009897);extracellular exosome (GO:0070062);extracellular space (GO:0005615);focal adhesion (GO:0005925);integral component of plasma membrane (GO:0005887);	Cell adhesion;Complete proteome;Direct protein sequencing;Disulfide bond;Fertilization;Glycoprotein;Lipoprotein;Membrane;Palmitate;Reference proteome;Transmembrane;Transmembrane helix.;		-0.00748973	1.83276	1	1	88	95	91.5	CD9
Locus_10200_Transcript_1/4_Confidence_0.500_Length_933	933	Locus_10200_Transcript_1/4_Confidence_0.500_Length_933	933	Locus_10200_Transcript_1/4_Confidence_0.500_Length_933	933	Q9W7C5	92.857	1.17e-18	HBEGF_CHICK	Proheparin-binding EGF-like growth factor	gga:395654	GO:0005615 \\ GO:0005887 \\ GO:0005154 \\ GO:0008083 \\ GO:0008201 \\ GO:0060326 \\ GO:0021545 \\ GO:0007173 \\ GO:0008284 \\ GO:0051549 \\ GO:0051897 \\ GO:0048661 \\ GO:0090303 \\ GO:0008016 \\ GO:0035313 \\	cell chemotaxis (GO:0060326);cranial nerve development (GO:0021545);epidermal growth factor receptor signaling pathway (GO:0007173);positive regulation of cell proliferation (GO:0008284);positive regulation of keratinocyte migration (GO:0051549);positive regulation of protein kinase B signaling (GO:0051897);positive regulation of smooth muscle cell proliferation (GO:0048661);positive regulation o…	epidermal growth factor receptor binding (GO:0005154);growth factor activity (GO:0008083);heparin binding (GO:0008201);	extracellular space (GO:0005615);integral component of plasma membrane (GO:0005887);	Cell membrane;Complete proteome;Disulfide bond;EGF-like domain;Growth factor;Heparin-binding;Membrane;Receptor;Reference proteome;Secreted;Signal;Transmembrane;Transmembrane helix.;		0.596707	-0.21705	0.551101	1	24	17	20.5	HBEGF
Locus_10200_Transcript_2/4_Confidence_0.400_Length_797	797	Locus_10200_Transcript_2/4_Confidence_0.400_Length_797	797	Locus_10200_Transcript_2/4_Confidence_0.400_Length_797	797	Q9W7C5	83.069	6.58e-63	HBEGF_CHICK	Proheparin-binding EGF-like growth factor	gga:395654	GO:0005615 \\ GO:0005887 \\ GO:0005154 \\ GO:0008083 \\ GO:0008201 \\ GO:0060326 \\ GO:0021545 \\ GO:0007173 \\ GO:0008284 \\ GO:0051549 \\ GO:0051897 \\ GO:0048661 \\ GO:0090303 \\ GO:0008016 \\ GO:0035313 \\	cell chemotaxis (GO:0060326);cranial nerve development (GO:0021545);epidermal growth factor receptor signaling pathway (GO:0007173);positive regulation of cell proliferation (GO:0008284);positive regulation of keratinocyte migration (GO:0051549);positive regulation of protein kinase B signaling (GO:0051897);positive regulation of smooth muscle cell proliferation (GO:0048661);positive regulation o…	epidermal growth factor receptor binding (GO:0005154);growth factor activity (GO:0008083);heparin binding (GO:0008201);	extracellular space (GO:0005615);integral component of plasma membrane (GO:0005887);	Cell membrane;Complete proteome;Disulfide bond;EGF-like domain;Growth factor;Heparin-binding;Membrane;Receptor;Reference proteome;Secreted;Signal;Transmembrane;Transmembrane helix.;		-1.18371	-0.330903	0.24351	1	11	27	19	HBEGF
Locus_10200_Transcript_3/4_Confidence_0.500_Length_2576	2576	Locus_10200_Transcript_3/4_Confidence_0.500_Length_2576	2576	Locus_10200_Transcript_3/4_Confidence_0.500_Length_2576	2576	Q9W7C5	92.857	5.97e-18	HBEGF_CHICK	Proheparin-binding EGF-like growth factor	gga:395654	GO:0005615 \\ GO:0005887 \\ GO:0005154 \\ GO:0008083 \\ GO:0008201 \\ GO:0060326 \\ GO:0021545 \\ GO:0007173 \\ GO:0008284 \\ GO:0051549 \\ GO:0051897 \\ GO:0048661 \\ GO:0090303 \\ GO:0008016 \\ GO:0035313 \\	cell chemotaxis (GO:0060326);cranial nerve development (GO:0021545);epidermal growth factor receptor signaling pathway (GO:0007173);positive regulation of cell proliferation (GO:0008284);positive regulation of keratinocyte migration (GO:0051549);positive regulation of protein kinase B signaling (GO:0051897);positive regulation of smooth muscle cell proliferation (GO:0048661);positive regulation o…	epidermal growth factor receptor binding (GO:0005154);growth factor activity (GO:0008083);heparin binding (GO:0008201);	extracellular space (GO:0005615);integral component of plasma membrane (GO:0005887);	Cell membrane;Complete proteome;Disulfide bond;EGF-like domain;Growth factor;Heparin-binding;Membrane;Receptor;Reference proteome;Secreted;Signal;Transmembrane;Transmembrane helix.;		-0.185804	0.284062	0.874718	1	27	33	30	HBEGF
Locus_10200_Transcript_4/4_Confidence_0.600_Length_1278	1278	Locus_10200_Transcript_4/4_Confidence_0.600_Length_1278	1278	Locus_10200_Transcript_4/4_Confidence_0.600_Length_1278	1278	Q9W7C5	84.434	4.93e-78	HBEGF_CHICK	Proheparin-binding EGF-like growth factor	gga:395654	GO:0005615 \\ GO:0005887 \\ GO:0005154 \\ GO:0008083 \\ GO:0008201 \\ GO:0060326 \\ GO:0021545 \\ GO:0007173 \\ GO:0008284 \\ GO:0051549 \\ GO:0051897 \\ GO:0048661 \\ GO:0090303 \\ GO:0008016 \\ GO:0035313 \\	cell chemotaxis (GO:0060326);cranial nerve development (GO:0021545);epidermal growth factor receptor signaling pathway (GO:0007173);positive regulation of cell proliferation (GO:0008284);positive regulation of keratinocyte migration (GO:0051549);positive regulation of protein kinase B signaling (GO:0051897);positive regulation of smooth muscle cell proliferation (GO:0048661);positive regulation o…	epidermal growth factor receptor binding (GO:0005154);growth factor activity (GO:0008083);heparin binding (GO:0008201);	extracellular space (GO:0005615);integral component of plasma membrane (GO:0005887);	Cell membrane;Complete proteome;Disulfide bond;EGF-like domain;Growth factor;Heparin-binding;Membrane;Receptor;Reference proteome;Secreted;Signal;Transmembrane;Transmembrane helix.;		-0.61114	0.564668	0.535933	1	28	46	37	HBEGF
Locus_102007_Transcript_1/1_Confidence_1.000_Length_257	257	No_sig_nr_hit	No_sig_nr_hit	No_sig_nr_hit	No_sig_nr_hit	No_Uniprotmatch	No_%_identity	No_evalue	No_ID	No_Description	No_KEGG	No_GO	No_GOCC	No_GOBP	No_GOMF	No_keywords		0.101863	-0.906024	1	1	12	12	12	No
Locus_10201_Transcript_1/1_Confidence_1.000_Length_1186	1186	Locus_10201_Transcript_1/1_Confidence_1.000_Length_1186	1186	Locus_10201_Transcript_1/1_Confidence_1.000_Length_1186	1186	Q9H898	82.533	1.22e-127	ZMAT4_HUMAN	Zinc finger matrin-type protein 4	hsa:79698	GO:0005634 \\ GO:0003677 \\ GO:0002039 \\ GO:0003723 \\ GO:0008270 \\ GO:0072332 \\	intrinsic apoptotic signaling pathway by p53 class mediator (GO:0072332);	DNA binding (GO:0003677);p53 binding (GO:0002039);RNA binding (GO:0003723);zinc ion binding (GO:0008270);	nucleus (GO:0005634);	Alternative splicing;Complete proteome;DNA-binding;Metal-binding;Nucleus;Polymorphism;Reference proteome;Repeat;Zinc;Zinc-finger.;		-0.43627	0.690373	0.656375	1	33	48	40.5	ZMAT4
Locus_10202_Transcript_1/1_Confidence_1.000_Length_1229	1229	No_sig_nr_hit	No_sig_nr_hit	No_sig_nr_hit	No_sig_nr_hit	No_Uniprotmatch	No_%_identity	No_evalue	No_ID	No_Description	No_KEGG	No_GO	No_GOCC	No_GOBP	No_GOMF	No_keywords		0.0434118	4.21449	0.963189	1	475	495	485	No
Locus_102047_Transcript_1/1_Confidence_1.000_Length_347	347	No_sig_nr_hit	No_sig_nr_hit	No_sig_nr_hit	No_sig_nr_hit	No_Uniprotmatch	No_%_identity	No_evalue	No_ID	No_Description	No_KEGG	No_GO	No_GOCC	No_GOBP	No_GOMF	No_keywords		0.461844	-0.54062	0.644899	1	18	14	16	No
Locus_10206_Transcript_1/2_Confidence_0.750_Length_2774	2774	No_sig_nr_hit	No_sig_nr_hit	No_sig_nr_hit	No_sig_nr_hit	No_Uniprotmatch	No_%_identity	No_evalue	No_ID	No_Description	No_KEGG	No_GO	No_GOCC	No_GOBP	No_GOMF	No_keywords		-0.577705	1.28971	0.536878	1	48	77	62.5	No
Locus_102084_Transcript_1/1_Confidence_1.000_Length_259	259	No_sig_nr_hit	No_sig_nr_hit	No_sig_nr_hit	No_sig_nr_hit	No_Uniprotmatch	No_%_identity	No_evalue	No_ID	No_Description	No_KEGG	No_GO	No_GOCC	No_GOBP	No_GOMF	No_keywords		0.340368	-0.90451	0.906907	1	13	11	12	No
Locus_10209_Transcript_1/4_Confidence_0.500_Length_5042	5042	Locus_10209_Transcript_1/4_Confidence_0.500_Length_5042	5042	Locus_10209_Transcript_1/4_Confidence_0.500_Length_5042	5042	Q5W0Q7	36.777	1.06e-128	USPL1_HUMAN	SUMO-specific isopeptidase USPL1	hsa:10208	GO:0015030 \\ GO:0005615 \\ GO:0032183 \\ GO:0070140 \\ GO:0030576 \\ GO:0008283 \\ GO:0016926 \\	Cajal body organization (GO:0030576);cell proliferation (GO:0008283);protein desumoylation (GO:0016926);	SUMO binding (GO:0032183);SUMO-specific isopeptidase activity (GO:0070140);	Cajal body (GO:0015030);extracellular space (GO:0005615);	Alternative splicing;Complete proteome;Hydrolase;Nucleus;Polymorphism;Protease;Reference proteome;Thiol protease.;		-0.0570787	2.86626	0.956948	1	179	200	189.5	USPL1
Locus_10209_Transcript_4/4_Confidence_0.500_Length_5113	5113	Locus_10209_Transcript_4/4_Confidence_0.500_Length_5113	5113	Locus_10209_Transcript_4/4_Confidence_0.500_Length_5113	5113	Q5W0Q7	38.197	9.11e-146	USPL1_HUMAN	SUMO-specific isopeptidase USPL1	hsa:10208	GO:0015030 \\ GO:0005615 \\ GO:0032183 \\ GO:0070140 \\ GO:0030576 \\ GO:0008283 \\ GO:0016926 \\	Cajal body organization (GO:0030576);cell proliferation (GO:0008283);protein desumoylation (GO:0016926);	SUMO binding (GO:0032183);SUMO-specific isopeptidase activity (GO:0070140);	Cajal body (GO:0015030);extracellular space (GO:0005615);	Alternative splicing;Complete proteome;Hydrolase;Nucleus;Polymorphism;Protease;Reference proteome;Thiol protease.;		0.102849	2.72223	0.912798	1	171	171	171	USPL1
Locus_1021_Transcript_3/7_Confidence_0.471_Length_3581	3581	Locus_1021_Transcript_3/7_Confidence_0.471_Length_3581	3581	Locus_1021_Transcript_3/7_Confidence_0.471_Length_3581	3581	Q14558	93.86	0	KPRA_HUMAN	Phosphoribosyl pyrophosphate synthase-associated protein 1	hsa:5635	GO:0002189 \\ GO:0004857 \\ GO:0000287 \\ GO:0004749 \\ GO:0033673 \\ GO:0006139 \\ GO:0009165 \\	negative regulation of kinase activity (GO:0033673);nucleobase-containing compound metabolic process (GO:0006139);nucleotide biosynthetic process (GO:0009165);	enzyme inhibitor activity (GO:0004857);magnesium ion binding (GO:0000287);ribose phosphate diphosphokinase activity (GO:0004749);	ribose phosphate diphosphokinase complex (GO:0002189);	3D-structure;Acetylation;Alternative splicing;Complete proteome;Nucleotide biosynthesis;Phosphoprotein;Reference proteome.;		0.0579808	3.99948	0.947441	1	411	424	417.5	KPRA
Locus_1021_Transcript_4/7_Confidence_0.529_Length_5133	5133	Locus_1021_Transcript_4/7_Confidence_0.529_Length_5133	5133	Locus_1021_Transcript_4/7_Confidence_0.529_Length_5133	5133	Q14558	96.629	0	KPRA_HUMAN	Phosphoribosyl pyrophosphate synthase-associated protein 1	hsa:5635	GO:0002189 \\ GO:0004857 \\ GO:0000287 \\ GO:0004749 \\ GO:0033673 \\ GO:0006139 \\ GO:0009165 \\	negative regulation of kinase activity (GO:0033673);nucleobase-containing compound metabolic process (GO:0006139);nucleotide biosynthetic process (GO:0009165);	enzyme inhibitor activity (GO:0004857);magnesium ion binding (GO:0000287);ribose phosphate diphosphokinase activity (GO:0004749);	ribose phosphate diphosphokinase complex (GO:0002189);	3D-structure;Acetylation;Alternative splicing;Complete proteome;Nucleotide biosynthesis;Phosphoprotein;Reference proteome.;		-0.075943	4.4929	0.929971	1	553	626	589.5	KPRA
Locus_1021_Transcript_6/7_Confidence_0.118_Length_2154	2154	Locus_1021_Transcript_6/7_Confidence_0.118_Length_2154	2154	Locus_1021_Transcript_6/7_Confidence_0.118_Length_2154	2154	Q8CI15	55.376	8.13e-135	SPHK1_MOUSE	Sphingosine kinase 1	mmu:20698	GO:0030424 \\ GO:0005737 \\ GO:0005829 \\ GO:0005634 \\ GO:0005886 \\ GO:0008021 \\ GO:0005524 \\ GO:0005516 \\ GO:0017050 \\ GO:0003677 \\ GO:0000287 \\ GO:0051721 \\ GO:0008481 \\ GO:0038036 \\ GO:0001568 \\ GO:0007420 \\ GO:0019722 \\ GO:0071363 \\ GO:0070301 \\ GO:0009267 \\ GO:0019371 \\ GO:0007565 \\ GO:0006954 \\ GO:0046834 \\ GO:0043066 \\ GO:0045766 \\ GO:0030307 \\ GO:0030335 \\ GO:0008…	blood vessel development (GO:0001568);brain development (GO:0007420);calcium-mediated signaling (GO:0019722);cellular response to growth factor stimulus (GO:0071363);cellular response to hydrogen peroxide (GO:0070301);cellular response to starvation (GO:0009267);cyclooxygenase pathway (GO:0019371);female pregnancy (GO:0007565);inflammatory response (GO:0006954);lipid phosphorylation (GO:0046834);…	ATP binding (GO:0005524);calmodulin binding (GO:0005516);D-erythro-sphingosine kinase activity (GO:0017050);DNA binding (GO:0003677);magnesium ion binding (GO:0000287);protein phosphatase 2A binding (GO:0051721);sphinganine kinase activity (GO:0008481);sphingosine-1-phosphate receptor activity (GO:0038036);	axon (GO:0030424);cytoplasm (GO:0005737);cytosol (GO:0005829);nucleus (GO:0005634);plasma membrane (GO:0005886);synaptic vesicle (GO:0008021);	Alternative splicing;ATP-binding;Calmodulin-binding;Cell membrane;Complete proteome;Cytoplasm;Kinase;Membrane;Nucleotide-binding;Nucleus;Phosphoprotein;Reference proteome;Transferase.;		0.144018	2.43794	0.874846	1	142	138	140	SPHK1
Locus_102110_Transcript_1/1_Confidence_1.000_Length_232	232	Locus_102110_Transcript_1/1_Confidence_1.000_Length_232	232	Locus_102110_Transcript_1/1_Confidence_1.000_Length_232	232	Q8WWI1	66	1.61e-12	LMO7_HUMAN	LIM domain only protein 7	hsa:4008	GO:0005737 \\ GO:0005925 \\ GO:0005634 \\ GO:0000151 \\ GO:0004842 \\ GO:0008270 \\ GO:0016567 \\ GO:0030155 \\ GO:0023051 \\	protein ubiquitination (GO:0016567);regulation of cell adhesion (GO:0030155);regulation of signaling (GO:0023051);	ubiquitin-protein transferase activity (GO:0004842);zinc ion binding (GO:0008270);	cytoplasm (GO:0005737);focal adhesion (GO:0005925);nucleus (GO:0005634);ubiquitin ligase complex (GO:0000151);	3D-structure;Acetylation;Alternative splicing;Complete proteome;LIM domain;Metal-binding;Phosphoprotein;Polymorphism;Reference proteome;Zinc.;		-0.656269	-0.764206	0.581921	1	10	17	13.5	LMO7
Locus_10212_Transcript_1/2_Confidence_0.750_Length_1245	1245	Locus_10212_Transcript_1/2_Confidence_0.750_Length_1245	1245	Locus_10212_Transcript_1/2_Confidence_0.750_Length_1245	1245	P57760	64.438	6.12e-152	STK16_RAT	Serine/threonine-protein kinase 16	rno:286927	GO:0005798 \\ GO:0016020 \\ GO:0048471 \\ GO:0005524 \\ GO:0004715 \\ GO:0004672 \\ GO:0004674 \\ GO:0001077 \\ GO:0071560 \\ GO:0045944 \\ GO:0046777 \\ GO:0006366 \\	cellular response to transforming growth factor beta stimulus (GO:0071560);positive regulation of transcription from RNA polymerase II promoter (GO:0045944);protein autophosphorylation (GO:0046777);transcription from RNA polymerase II promoter (GO:0006366);	ATP binding (GO:0005524);non-membrane spanning protein tyrosine kinase activity (GO:0004715);protein kinase activity (GO:0004672);protein serine/threonine kinase activity (GO:0004674);transcriptional activator activity, RNA polymerase II core promoter proximal region sequence-specific binding (GO:0001077);	Golgi-associated vesicle (GO:0005798);membrane (GO:0016020);perinuclear region of cytoplasm (GO:0048471);	ATP-binding;Complete proteome;Cytoplasm;Kinase;Lipoprotein;Membrane;Myristate;Nucleotide-binding;Palmitate;Phosphoprotein;Reference proteome;Serine/threonine-protein kinase;Transferase.;		0.412336	1.14923	0.658494	1	62	50	56	STK16
Locus_10212_Transcript_2/2_Confidence_0.750_Length_1173	1173	Locus_10212_Transcript_2/2_Confidence_0.750_Length_1173	1173	Locus_10212_Transcript_2/2_Confidence_0.750_Length_1173	1173	P57760	69.508	8.45e-158	STK16_RAT	Serine/threonine-protein kinase 16	rno:286927	GO:0005798 \\ GO:0016020 \\ GO:0048471 \\ GO:0005524 \\ GO:0004715 \\ GO:0004672 \\ GO:0004674 \\ GO:0001077 \\ GO:0071560 \\ GO:0045944 \\ GO:0046777 \\ GO:0006366 \\	cellular response to transforming growth factor beta stimulus (GO:0071560);positive regulation of transcription from RNA polymerase II promoter (GO:0045944);protein autophosphorylation (GO:0046777);transcription from RNA polymerase II promoter (GO:0006366);	ATP binding (GO:0005524);non-membrane spanning protein tyrosine kinase activity (GO:0004715);protein kinase activity (GO:0004672);protein serine/threonine kinase activity (GO:0004674);transcriptional activator activity, RNA polymerase II core promoter proximal region sequence-specific binding (GO:0001077);	Golgi-associated vesicle (GO:0005798);membrane (GO:0016020);perinuclear region of cytoplasm (GO:0048471);	ATP-binding;Complete proteome;Cytoplasm;Kinase;Lipoprotein;Membrane;Myristate;Nucleotide-binding;Palmitate;Phosphoprotein;Reference proteome;Serine/threonine-protein kinase;Transferase.;		0.102682	1.06863	0.926084	1	53	53	53	STK16
Locus_10213_Transcript_2/6_Confidence_0.538_Length_6154	6154	Locus_10213_Transcript_2/6_Confidence_0.538_Length_6154	6154	Locus_10213_Transcript_2/6_Confidence_0.538_Length_6154	6154	Q6PFW1	75.27	0	VIP1_HUMAN	Inositol hexakisphosphate and diphosphoinositol-pentakisphosphate kinase 1	hsa:9677	GO:0005737 \\ GO:0005829 \\ GO:0005654 \\ GO:0005886 \\ GO:0003993 \\ GO:0005524 \\ GO:0033857 \\ GO:0052723 \\ GO:0052724 \\ GO:0000832 \\ GO:0000828 \\ GO:0000827 \\ GO:0006020 \\ GO:0043647 \\ GO:0044281 \\	inositol metabolic process (GO:0006020);inositol phosphate metabolic process (GO:0043647);small molecule metabolic process (GO:0044281);	acid phosphatase activity (GO:0003993);ATP binding (GO:0005524);diphosphoinositol-pentakisphosphate kinase activity (GO:0033857);inositol hexakisphosphate 1-kinase activity (GO:0052723);inositol hexakisphosphate 3-kinase activity (GO:0052724);inositol hexakisphosphate 5-kinase activity (GO:0000832);inositol hexakisphosphate kinase activity (GO:0000828);inositol-1,3,4,5,6-pentakisphosphate kinase …	cytoplasm (GO:0005737);cytosol (GO:0005829);nucleoplasm (GO:0005654);plasma membrane (GO:0005886);	Alternative splicing;ATP-binding;Cell membrane;Complete proteome;Cytoplasm;Kinase;Membrane;Nucleotide-binding;Phosphoprotein;Reference proteome;Transferase.;		-0.0913128	3.77228	0.915557	1	333	381	357	VIP1
Locus_10213_Transcript_5/6_Confidence_0.231_Length_3217	3217	Locus_10213_Transcript_5/6_Confidence_0.231_Length_3217	3217	Locus_10213_Transcript_5/6_Confidence_0.231_Length_3217	3217	Q6PFW1	85.117	0	VIP1_HUMAN	Inositol hexakisphosphate and diphosphoinositol-pentakisphosphate kinase 1	hsa:9677	GO:0005737 \\ GO:0005829 \\ GO:0005654 \\ GO:0005886 \\ GO:0003993 \\ GO:0005524 \\ GO:0033857 \\ GO:0052723 \\ GO:0052724 \\ GO:0000832 \\ GO:0000828 \\ GO:0000827 \\ GO:0006020 \\ GO:0043647 \\ GO:0044281 \\	inositol metabolic process (GO:0006020);inositol phosphate metabolic process (GO:0043647);small molecule metabolic process (GO:0044281);	acid phosphatase activity (GO:0003993);ATP binding (GO:0005524);diphosphoinositol-pentakisphosphate kinase activity (GO:0033857);inositol hexakisphosphate 1-kinase activity (GO:0052723);inositol hexakisphosphate 3-kinase activity (GO:0052724);inositol hexakisphosphate 5-kinase activity (GO:0000832);inositol hexakisphosphate kinase activity (GO:0000828);inositol-1,3,4,5,6-pentakisphosphate kinase …	cytoplasm (GO:0005737);cytosol (GO:0005829);nucleoplasm (GO:0005654);plasma membrane (GO:0005886);	Alternative splicing;ATP-binding;Cell membrane;Complete proteome;Cytoplasm;Kinase;Membrane;Nucleotide-binding;Phosphoprotein;Reference proteome;Transferase.;		-0.0247767	1.15602	1	1	54	59	56.5	VIP1
Locus_10213_Transcript_6/6_Confidence_0.615_Length_6277	6277	Locus_10213_Transcript_6/6_Confidence_0.615_Length_6277	6277	Locus_10213_Transcript_6/6_Confidence_0.615_Length_6277	6277	Q6PFW1	79.502	0	VIP1_HUMAN	Inositol hexakisphosphate and diphosphoinositol-pentakisphosphate kinase 1	hsa:9677	GO:0005737 \\ GO:0005829 \\ GO:0005654 \\ GO:0005886 \\ GO:0003993 \\ GO:0005524 \\ GO:0033857 \\ GO:0052723 \\ GO:0052724 \\ GO:0000832 \\ GO:0000828 \\ GO:0000827 \\ GO:0006020 \\ GO:0043647 \\ GO:0044281 \\	inositol metabolic process (GO:0006020);inositol phosphate metabolic process (GO:0043647);small molecule metabolic process (GO:0044281);	acid phosphatase activity (GO:0003993);ATP binding (GO:0005524);diphosphoinositol-pentakisphosphate kinase activity (GO:0033857);inositol hexakisphosphate 1-kinase activity (GO:0052723);inositol hexakisphosphate 3-kinase activity (GO:0052724);inositol hexakisphosphate 5-kinase activity (GO:0000832);inositol hexakisphosphate kinase activity (GO:0000828);inositol-1,3,4,5,6-pentakisphosphate kinase …	cytoplasm (GO:0005737);cytosol (GO:0005829);nucleoplasm (GO:0005654);plasma membrane (GO:0005886);	Alternative splicing;ATP-binding;Cell membrane;Complete proteome;Cytoplasm;Kinase;Membrane;Nucleotide-binding;Phosphoprotein;Reference proteome;Transferase.;		0.27178	3.75201	0.749919	1	371	330	350.5	VIP1
Locus_102147_Transcript_1/1_Confidence_1.000_Length_1047	1047	No_sig_nr_hit	No_sig_nr_hit	No_sig_nr_hit	No_sig_nr_hit	No_Uniprotmatch	No_%_identity	No_evalue	No_ID	No_Description	No_KEGG	No_GO	No_GOCC	No_GOBP	No_GOMF	No_keywords		0.322205	-0.804984	0.831972	1	14	12	13	No
Locus_10216_Transcript_1/2_Confidence_0.667_Length_1181	1181	Locus_10216_Transcript_1/2_Confidence_0.667_Length_1181	1181	Locus_10216_Transcript_1/2_Confidence_0.667_Length_1181	1181	Q9UII6	60.697	1.51e-74	DS13B_HUMAN	Dual specificity protein phosphatase 13 isoform B	No_KEGG	GO:0004725 \\ GO:0008138 \\ GO:0007126 \\ GO:0006470 \\ GO:0007283 \\	meiotic nuclear division (GO:0007126);protein dephosphorylation (GO:0006470);spermatogenesis (GO:0007283);	protein tyrosine phosphatase activity (GO:0004725);protein tyrosine/serine/threonine phosphatase activity (GO:0008138);	No_GOCC	3D-structure;Alternative promoter usage;Alternative splicing;Complete proteome;Hydrolase;Polymorphism;Protein phosphatase;Reference proteome.;		0.249184	2.41909	0.77722	1	145	131	138	DS13B
Locus_10216_Transcript_2/2_Confidence_0.667_Length_1064	1064	Locus_10216_Transcript_2/2_Confidence_0.667_Length_1064	1064	Locus_10216_Transcript_2/2_Confidence_0.667_Length_1064	1064	Q9UII6	54.412	1.1e-36	DS13B_HUMAN	Dual specificity protein phosphatase 13 isoform B	No_KEGG	GO:0004725 \\ GO:0008138 \\ GO:0007126 \\ GO:0006470 \\ GO:0007283 \\	meiotic nuclear division (GO:0007126);protein dephosphorylation (GO:0006470);spermatogenesis (GO:0007283);	protein tyrosine phosphatase activity (GO:0004725);protein tyrosine/serine/threonine phosphatase activity (GO:0008138);	No_GOCC	3D-structure;Alternative promoter usage;Alternative splicing;Complete proteome;Hydrolase;Polymorphism;Protein phosphatase;Reference proteome.;		-0.0668043	0.760921	0.969299	1	40	45	42.5	DS13B
Locus_10217_Transcript_1/3_Confidence_0.750_Length_2379	2379	Locus_10217_Transcript_1/3_Confidence_0.750_Length_2379	2379	Locus_10217_Transcript_1/3_Confidence_0.750_Length_2379	2379	Q8BTY1	57.773	0	KAT1_MOUSE	Kynurenine--oxoglutarate transaminase 1	mmu:70266	GO:0005737 \\ GO:0005829 \\ GO:0005739 \\ GO:0005654 \\ GO:0047804 \\ GO:0047316 \\ GO:0016212 \\ GO:0047945 \\ GO:0047312 \\ GO:0042803 \\ GO:0030170 \\ GO:0009058 \\ GO:0070189 \\ GO:0097053 \\ GO:0006090 \\	biosynthetic process (GO:0009058);kynurenine metabolic process (GO:0070189);L-kynurenine catabolic process (GO:0097053);pyruvate metabolic process (GO:0006090);	cysteine-S-conjugate beta-lyase activity (GO:0047804);glutamine-phenylpyruvate transaminase activity (GO:0047316);kynurenine-oxoglutarate transaminase activity (GO:0016212);L-glutamine (GO:0047945);L-phenylalanine (GO:0047312);protein homodimerization activity (GO:0042803);pyridoxal phosphate binding (GO:0030170);	cytoplasm (GO:0005737);cytosol (GO:0005829);mitochondrion (GO:0005739);nucleoplasm (GO:0005654);	Aminotransferase;Complete proteome;Cytoplasm;Lyase;Pyridoxal phosphate;Reference proteome;Transferase.;		0.0213898	4.56595	0.982237	1	602	637	619.5	KAT1
Locus_10217_Transcript_2/3_Confidence_0.750_Length_2217	2217	Locus_10217_Transcript_2/3_Confidence_0.750_Length_2217	2217	Locus_10217_Transcript_2/3_Confidence_0.750_Length_2217	2217	Q16773	64.929	0	KAT1_HUMAN	Kynurenine--oxoglutarate transaminase 1	hsa:883	GO:0005737 \\ GO:0005829 \\ GO:0005654 \\ GO:0047804 \\ GO:0047316 \\ GO:0016212 \\ GO:0047945 \\ GO:0047312 \\ GO:0042803 \\ GO:0030170 \\ GO:0008483 \\ GO:0008652 \\ GO:0006575 \\ GO:0034641 \\ GO:0070189 \\ GO:0097053 \\ GO:0006559 \\ GO:0044281 \\ GO:0006569 \\	cellular amino acid biosynthetic process (GO:0008652);cellular modified amino acid metabolic process (GO:0006575);cellular nitrogen compound metabolic process (GO:0034641);kynurenine metabolic process (GO:0070189);L-kynurenine catabolic process (GO:0097053);L-phenylalanine catabolic process (GO:0006559);small molecule metabolic process (GO:0044281);tryptophan catabolic process (GO:0006569);	cysteine-S-conjugate beta-lyase activity (GO:0047804);glutamine-phenylpyruvate transaminase activity (GO:0047316);kynurenine-oxoglutarate transaminase activity (GO:0016212);L-glutamine (GO:0047945);L-phenylalanine (GO:0047312);protein homodimerization activity (GO:0042803);pyridoxal phosphate binding (GO:0030170);transaminase activity (GO:0008483);	cytoplasm (GO:0005737);cytosol (GO:0005829);nucleoplasm (GO:0005654);	3D-structure;Alternative splicing;Aminotransferase;Complete proteome;Cytoplasm;Lyase;Pyridoxal phosphate;Reference proteome;Transferase.;		-0.0230083	4.56403	0.982208	1	592	646	619	KAT1
Locus_10219_Transcript_1/4_Confidence_0.667_Length_5337	5337	Locus_10219_Transcript_1/4_Confidence_0.667_Length_5337	5337	Locus_10219_Transcript_1/4_Confidence_0.667_Length_5337	5337	Q86YT6	97.813	0	MIB1_HUMAN	E3 ubiquitin-protein ligase MIB1	hsa:57534	GO:0005813 \\ GO:0005737 \\ GO:0031410 \\ GO:0005829 \\ GO:0005886 \\ GO:0014069 \\ GO:0016874 \\ GO:0004842 \\ GO:0008270 \\ GO:0001568 \\ GO:0006897 \\ GO:0001947 \\ GO:0001701 \\ GO:0045665 \\ GO:0001841 \\ GO:0007219 \\ GO:0045807 \\ GO:0001756 \\	blood vessel development (GO:0001568);endocytosis (GO:0006897);heart looping (GO:0001947);in utero embryonic development (GO:0001701);negative regulation of neuron differentiation (GO:0045665);neural tube formation (GO:0001841);Notch signaling pathway (GO:0007219);positive regulation of endocytosis (GO:0045807);somitogenesis (GO:0001756);	ligase activity (GO:0016874);ubiquitin-protein transferase activity (GO:0004842);zinc ion binding (GO:0008270);	centrosome (GO:0005813);cytoplasm (GO:0005737);cytoplasmic vesicle (GO:0031410);cytosol (GO:0005829);plasma membrane (GO:0005886);postsynaptic density (GO:0014069);	3D-structure;ANK repeat;Cell membrane;Coiled coil;Complete proteome;Cytoplasm;Cytoskeleton;Disease mutation;Ligase;Membrane;Metal-binding;Notch signaling pathway;Phosphoprotein;Polymorphism;Reference proteome;Repeat;Ubl conjugation;Ubl conjugation pathway;Zinc;Zinc-finger.;		-0.0980167	2.15487	0.918169	1	107	123	115	MIB1
Locus_10219_Transcript_3/4_Confidence_0.667_Length_5343	5343	Locus_10219_Transcript_3/4_Confidence_0.667_Length_5343	5343	Locus_10219_Transcript_3/4_Confidence_0.667_Length_5343	5343	Q80SY4	98.211	0	MIB1_MOUSE	E3 ubiquitin-protein ligase MIB1	mmu:225164	GO:0005813 \\ GO:0031410 \\ GO:0005886 \\ GO:0014069 \\ GO:0016874 \\ GO:0004842 \\ GO:0008270 \\ GO:0001568 \\ GO:0006897 \\ GO:0007507 \\ GO:0001947 \\ GO:0001701 \\ GO:0045665 \\ GO:0001841 \\ GO:0007219 \\ GO:0045807 \\ GO:0001756 \\	blood vessel development (GO:0001568);endocytosis (GO:0006897);heart development (GO:0007507);heart looping (GO:0001947);in utero embryonic development (GO:0001701);negative regulation of neuron differentiation (GO:0045665);neural tube formation (GO:0001841);Notch signaling pathway (GO:0007219);positive regulation of endocytosis (GO:0045807);somitogenesis (GO:0001756);	ligase activity (GO:0016874);ubiquitin-protein transferase activity (GO:0004842);zinc ion binding (GO:0008270);	centrosome (GO:0005813);cytoplasmic vesicle (GO:0031410);plasma membrane (GO:0005886);postsynaptic density (GO:0014069);	ANK repeat;Cell membrane;Coiled coil;Complete proteome;Cytoplasm;Cytoskeleton;Ligase;Membrane;Metal-binding;Notch signaling pathway;Phosphoprotein;Reference proteome;Repeat;Ubl conjugation;Ubl conjugation pathway;Zinc;Zinc-finger.;		-0.2188	2.38066	0.800878	1	120	150	135	MIB1
Locus_10219_Transcript_4/4_Confidence_0.667_Length_5370	5370	Locus_10219_Transcript_4/4_Confidence_0.667_Length_5370	5370	Locus_10219_Transcript_4/4_Confidence_0.667_Length_5370	5370	Q86YT6	98.807	0	MIB1_HUMAN	E3 ubiquitin-protein ligase MIB1	hsa:57534	GO:0005813 \\ GO:0005737 \\ GO:0031410 \\ GO:0005829 \\ GO:0005886 \\ GO:0014069 \\ GO:0016874 \\ GO:0004842 \\ GO:0008270 \\ GO:0001568 \\ GO:0006897 \\ GO:0001947 \\ GO:0001701 \\ GO:0045665 \\ GO:0001841 \\ GO:0007219 \\ GO:0045807 \\ GO:0001756 \\	blood vessel development (GO:0001568);endocytosis (GO:0006897);heart looping (GO:0001947);in utero embryonic development (GO:0001701);negative regulation of neuron differentiation (GO:0045665);neural tube formation (GO:0001841);Notch signaling pathway (GO:0007219);positive regulation of endocytosis (GO:0045807);somitogenesis (GO:0001756);	ligase activity (GO:0016874);ubiquitin-protein transferase activity (GO:0004842);zinc ion binding (GO:0008270);	centrosome (GO:0005813);cytoplasm (GO:0005737);cytoplasmic vesicle (GO:0031410);cytosol (GO:0005829);plasma membrane (GO:0005886);postsynaptic density (GO:0014069);	3D-structure;ANK repeat;Cell membrane;Coiled coil;Complete proteome;Cytoplasm;Cytoskeleton;Disease mutation;Ligase;Membrane;Metal-binding;Notch signaling pathway;Phosphoprotein;Polymorphism;Reference proteome;Repeat;Ubl conjugation;Ubl conjugation pathway;Zinc;Zinc-finger.;		-0.0438709	2.1922	0.965755	1	112	124	118	MIB1
Locus_1022_Transcript_2/4_Confidence_0.700_Length_8056	8056	Locus_1022_Transcript_2/4_Confidence_0.700_Length_8056	8056	Locus_1022_Transcript_2/4_Confidence_0.700_Length_8056	8056	Q5R8X7	81.066	0	M3K13_PONAB	Mitogen-activated protein kinase kinase kinase 13	pon:100172983	GO:0005737 \\ GO:0016020 \\ GO:0005524 \\ GO:0004709 \\ GO:0046872 \\ GO:0042803 \\ GO:0004674 \\ GO:0000186 \\ GO:0007254 \\ GO:0051092 \\ GO:0046777 \\ GO:0006468 \\	activation of MAPKK activity (GO:0000186);JNK cascade (GO:0007254);positive regulation of NF-kappaB transcription factor activity (GO:0051092);protein autophosphorylation (GO:0046777);protein phosphorylation (GO:0006468);	ATP binding (GO:0005524);MAP kinase kinase kinase activity (GO:0004709);metal ion binding (GO:0046872);protein homodimerization activity (GO:0042803);protein serine/threonine kinase activity (GO:0004674);	cytoplasm (GO:0005737);membrane (GO:0016020);	ATP-binding;Complete proteome;Cytoplasm;Kinase;Magnesium;Membrane;Metal-binding;Nucleotide-binding;Phosphoprotein;Reference proteome;Repeat;Serine/threonine-protein kinase;Transferase.;		0.0654316	4.14507	0.940661	1	456	468	462	M3K13
Locus_1022_Transcript_3/4_Confidence_0.400_Length_752	752	Locus_1022_Transcript_3/4_Confidence_0.400_Length_752	752	Locus_1022_Transcript_3/4_Confidence_0.400_Length_752	752	Q96HV5	77.778	4.46e-60	TM41A_HUMAN	Transmembrane protein 41A	hsa:90407	GO:0016021 \\	No_GOBP	No_GOMF	integral component of membrane (GO:0016021);	Complete proteome;Glycoprotein;Membrane;Reference proteome;Signal;Transmembrane;Transmembrane helix.;		-0.544128	0.9088	0.553104	1	37	58	47.5	TM41A
Locus_10220_Transcript_1/1_Confidence_1.000_Length_1068	1068	Locus_10220_Transcript_1/1_Confidence_1.000_Length_1068	1068	Locus_10220_Transcript_1/1_Confidence_1.000_Length_1068	1068	O54984	95.899	0	ASNA_MOUSE	ATPase Asna1 {ECO:0000255|HAMAP-Rule:MF_03112}	mmu:56495	GO:0005783 \\ GO:0070062 \\ GO:0005730 \\ GO:0005634 \\ GO:0005524 \\ GO:0016887 \\ GO:0046872 \\ GO:0045048 \\ GO:0006810 \\	protein insertion into ER membrane (GO:0045048);transport (GO:0006810);	ATP binding (GO:0005524);ATPase activity (GO:0016887);metal ion binding (GO:0046872);	endoplasmic reticulum (GO:0005783);extracellular exosome (GO:0070062);nucleolus (GO:0005730);nucleus (GO:0005634);	Acetylation;ATP-binding;Complete proteome;Cytoplasm;Direct protein sequencing;Endoplasmic reticulum;Hydrolase;Metal-binding;Nucleotide-binding;Nucleus;Reference proteome;Transport;Zinc.;		-0.151032	4.67998	0.858924	1	613	731	672	ASNA
Locus_10222_Transcript_1/2_Confidence_0.667_Length_3062	3062	Locus_10222_Transcript_1/2_Confidence_0.667_Length_3062	3062	Locus_10222_Transcript_1/2_Confidence_0.667_Length_3062	3062	O95502	63.571	1.73e-162	NPTXR_HUMAN	Neuronal pentraxin receptor	hsa:23467	GO:0016021 \\ GO:0046872 \\	No_GOBP	metal ion binding (GO:0046872);	integral component of membrane (GO:0016021);	Calcium;Complete proteome;Glycoprotein;Membrane;Metal-binding;Receptor;Reference proteome;Signal-anchor;Transmembrane;Transmembrane helix;Ubl conjugation.;		-0.178234	3.24306	0.834875	1	223	271	247	NPTXR
Locus_10222_Transcript_2/2_Confidence_0.667_Length_2984	2984	Locus_10222_Transcript_2/2_Confidence_0.667_Length_2984	2984	Locus_10222_Transcript_2/2_Confidence_0.667_Length_2984	2984	O35764	67.797	1.19e-134	NPTXR_RAT	Neuronal pentraxin receptor	No_KEGG	GO:0005615 \\ GO:0016021 \\ GO:0005886 \\ GO:0046872 \\ GO:0008029 \\ GO:0032403 \\ GO:0042542 \\ GO:0007165 \\	response to hydrogen peroxide (GO:0042542);signal transduction (GO:0007165);	metal ion binding (GO:0046872);pentraxin receptor activity (GO:0008029);protein complex binding (GO:0032403);	extracellular space (GO:0005615);integral component of membrane (GO:0016021);plasma membrane (GO:0005886);	Calcium;Complete proteome;Direct protein sequencing;Glycoprotein;Membrane;Metal-binding;Receptor;Reference proteome;Signal-anchor;Transmembrane;Transmembrane helix;Ubl conjugation.;		0.0765137	3.39315	0.930102	1	271	276	273.5	NPTXR
Locus_10223_Transcript_2/4_Confidence_0.667_Length_3185	3185	Locus_10223_Transcript_2/4_Confidence_0.667_Length_3185	3185	Locus_10223_Transcript_2/4_Confidence_0.667_Length_3185	3185	A0JN62	73.067	3.43e-180	CE120_BOVIN	Centrosomal protein of 120 kDa	bta:534400	GO:0005813 \\ GO:0005737 \\ GO:0030953 \\ GO:0021987 \\ GO:0022027 \\ GO:0022008 \\ GO:0032886 \\ GO:0032880 \\	astral microtubule organization (GO:0030953);cerebral cortex development (GO:0021987);interkinetic nuclear migration (GO:0022027);neurogenesis (GO:0022008);regulation of microtubule-based process (GO:0032886);regulation of protein localization (GO:0032880);	No_GOMF	centrosome (GO:0005813);cytoplasm (GO:0005737);	Alternative splicing;Coiled coil;Complete proteome;Cytoplasm;Cytoskeleton;Phosphoprotein;Reference proteome.;		0.267744	2.43985	0.761643	1	148	132	140	CE120
Locus_10223_Transcript_3/4_Confidence_0.667_Length_4848	4848	Locus_10223_Transcript_3/4_Confidence_0.667_Length_4848	4848	Locus_10223_Transcript_3/4_Confidence_0.667_Length_4848	4848	Q8N960	70.068	0	CE120_HUMAN	Centrosomal protein of 120 kDa	hsa:153241	GO:0005813 \\ GO:0005737 \\ GO:0030953 \\ GO:0021987 \\ GO:0022027 \\ GO:0022008 \\ GO:0032886 \\ GO:0032880 \\	astral microtubule organization (GO:0030953);cerebral cortex development (GO:0021987);interkinetic nuclear migration (GO:0022027);neurogenesis (GO:0022008);regulation of microtubule-based process (GO:0032886);regulation of protein localization (GO:0032880);	No_GOMF	centrosome (GO:0005813);cytoplasm (GO:0005737);	3D-structure;Alternative splicing;Ciliopathy;Coiled coil;Complete proteome;Cytoplasm;Cytoskeleton;Disease mutation;Phosphoprotein;Polymorphism;Reference proteome.;		0.0497745	2.65308	0.958397	1	160	166	163	CE120
Locus_10224_Transcript_1/10_Confidence_0.440_Length_3070	3070	Locus_10224_Transcript_1/10_Confidence_0.440_Length_3070	3070	Locus_10224_Transcript_1/10_Confidence_0.440_Length_3070	3070	Q5ZMJ9	100	2.44e-70	SRRM1_CHICK	Serine/arginine repetitive matrix protein 1	gga:428216	GO:0005634 \\ GO:0006397 \\ GO:0008380 \\	mRNA processing (GO:0006397);RNA splicing (GO:0008380);	No_GOMF	nucleus (GO:0005634);	Complete proteome;mRNA processing;mRNA splicing;Nucleus;Reference proteome.;		-0.0574836	2.2851	0.957011	1	119	133	126	SRRM1
Locus_10224_Transcript_2/10_Confidence_0.600_Length_4765	4765	Locus_10224_Transcript_2/10_Confidence_0.600_Length_4765	4765	Locus_10224_Transcript_2/10_Confidence_0.600_Length_4765	4765	Q5ZMJ9	100	2.29e-35	SRRM1_CHICK	Serine/arginine repetitive matrix protein 1	gga:428216	GO:0005634 \\ GO:0006397 \\ GO:0008380 \\	mRNA processing (GO:0006397);RNA splicing (GO:0008380);	No_GOMF	nucleus (GO:0005634);	Complete proteome;mRNA processing;mRNA splicing;Nucleus;Reference proteome.;		0.173196	2.83177	0.846485	1	189	180	184.5	SRRM1
Locus_10224_Transcript_3/10_Confidence_0.280_Length_2037	2037	Locus_10224_Transcript_3/10_Confidence_0.280_Length_2037	2037	Locus_10224_Transcript_3/10_Confidence_0.280_Length_2037	2037	Q5ZMJ9	95.652	1.37e-15	SRRM1_CHICK	Serine/arginine repetitive matrix protein 1	gga:428216	GO:0005634 \\ GO:0006397 \\ GO:0008380 \\	mRNA processing (GO:0006397);RNA splicing (GO:0008380);	No_GOMF	nucleus (GO:0005634);	Complete proteome;mRNA processing;mRNA splicing;Nucleus;Reference proteome.;		-0.201238	2.50686	0.826205	1	132	163	147.5	SRRM1
Locus_10224_Transcript_4/10_Confidence_0.480_Length_3704	3704	Locus_10224_Transcript_4/10_Confidence_0.480_Length_3704	3704	Locus_10224_Transcript_4/10_Confidence_0.480_Length_3704	3704	Q5ZMJ9	100	1.21e-68	SRRM1_CHICK	Serine/arginine repetitive matrix protein 1	gga:428216	GO:0005634 \\ GO:0006397 \\ GO:0008380 \\	mRNA processing (GO:0006397);RNA splicing (GO:0008380);	No_GOMF	nucleus (GO:0005634);	Complete proteome;mRNA processing;mRNA splicing;Nucleus;Reference proteome.;		0.132586	2.90281	0.88114	1	196	192	194	SRRM1
Locus_10224_Transcript_5/10_Confidence_0.600_Length_3795	3795	Locus_10224_Transcript_5/10_Confidence_0.600_Length_3795	3795	Locus_10224_Transcript_5/10_Confidence_0.600_Length_3795	3795	Q5ZMJ9	74.096	5.2e-62	SRRM1_CHICK	Serine/arginine repetitive matrix protein 1	gga:428216	GO:0005634 \\ GO:0006397 \\ GO:0008380 \\	mRNA processing (GO:0006397);RNA splicing (GO:0008380);	No_GOMF	nucleus (GO:0005634);	Complete proteome;mRNA processing;mRNA splicing;Nucleus;Reference proteome.;		-0.231628	2.96525	0.79409	1	180	227	203.5	SRRM1
Locus_10224_Transcript_6/10_Confidence_0.640_Length_5778	5778	Locus_10224_Transcript_6/10_Confidence_0.640_Length_5778	5778	Locus_10224_Transcript_6/10_Confidence_0.640_Length_5778	5778	Q5ZMJ9	100	3.09e-35	SRRM1_CHICK	Serine/arginine repetitive matrix protein 1	gga:428216	GO:0005634 \\ GO:0006397 \\ GO:0008380 \\	mRNA processing (GO:0006397);RNA splicing (GO:0008380);	No_GOMF	nucleus (GO:0005634);	Complete proteome;mRNA processing;mRNA splicing;Nucleus;Reference proteome.;		0.0146888	3.13796	0.994043	1	222	236	229	SRRM1
Locus_10224_Transcript_8/10_Confidence_0.320_Length_3753	3753	Locus_10224_Transcript_8/10_Confidence_0.320_Length_3753	3753	Locus_10224_Transcript_8/10_Confidence_0.320_Length_3753	3753	Q5ZMJ9	100	7.13e-70	SRRM1_CHICK	Serine/arginine repetitive matrix protein 1	gga:428216	GO:0005634 \\ GO:0006397 \\ GO:0008380 \\	mRNA processing (GO:0006397);RNA splicing (GO:0008380);	No_GOMF	nucleus (GO:0005634);	Complete proteome;mRNA processing;mRNA splicing;Nucleus;Reference proteome.;		0.234644	1.58385	0.793547	1	80	73	76.5	SRRM1
Locus_10225_Transcript_1/2_Confidence_0.750_Length_2921	2921	Locus_10225_Transcript_1/2_Confidence_0.750_Length_2921	2921	Locus_10225_Transcript_1/2_Confidence_0.750_Length_2921	2921	A0A0Q3LXR0	36	4.11e-17	A0A0Q3LXR0_AMAAE	Ras-related protein Rab-44 {ECO:0000313|EMBL:KQK75255.1}	No_KEGG	GO:0005576 \\ GO:0005622 \\ GO:0016020 \\ GO:0005525 \\ GO:0015031 \\ GO:0007264 \\	protein transport (GO:0015031);small GTPase mediated signal transduction (GO:0007264);	GTP binding (GO:0005525);	extracellular region (GO:0005576);intracellular (GO:0005622);membrane (GO:0016020);	Coiled coil {ECO:0000256|SAM:Coils};Complete proteome {ECO:0000313|Proteomes:UP000051836};GTP-binding {ECO:0000256|SAAS:SAAS00426399};Nucleotide-binding {ECO:0000256|SAAS:SAAS00426399};Reference proteome {ECO:0000313|Proteomes:UP000051836}.;		0.0640689	3.1008	0.945005	1	220	226	223	A0A0Q3LXR0
Locus_10225_Transcript_2/2_Confidence_0.500_Length_2187	2187	Locus_10225_Transcript_2/2_Confidence_0.500_Length_2187	2187	Locus_10225_Transcript_2/2_Confidence_0.500_Length_2187	2187	Q9ET66	45.562	9.41e-42	PI16_MOUSE	Peptidase inhibitor 16	mmu:74116	GO:0070062 \\ GO:0005615 \\ GO:0016021 \\ GO:0030414 \\ GO:0061052 \\	negative regulation of cell growth involved in cardiac muscle cell development (GO:0061052);	peptidase inhibitor activity (GO:0030414);	extracellular exosome (GO:0070062);extracellular space (GO:0005615);integral component of membrane (GO:0016021);	Alternative splicing;Complete proteome;Glycoprotein;Membrane;Protease inhibitor;Reference proteome;Signal;Transmembrane;Transmembrane helix.;		-0.0467797	2.38329	0.96997	1	128	142	135	PI16
Locus_10226_Transcript_2/6_Confidence_0.667_Length_2281	2281	Locus_10226_Transcript_2/6_Confidence_0.667_Length_2281	2281	Locus_10226_Transcript_2/6_Confidence_0.667_Length_2281	2281	Q640Z9	38.066	2.91e-73	LRC14_XENLA	Leucine-rich repeat-containing protein 14	xla:447755	No_GOcodes	No_GOBP	No_GOMF	No_GOCC	Leucine-rich repeat;Repeat.;		0.0033594	-0.669608	1	1	14	15	14.5	LRC14
Locus_10228_Transcript_1/1_Confidence_1.000_Length_2971	2971	Locus_10228_Transcript_1/1_Confidence_1.000_Length_2971	2971	Locus_10228_Transcript_1/1_Confidence_1.000_Length_2971	2971	Q15477	58.649	0	SKIV2_HUMAN	Helicase SKI2W	hsa:6499	GO:0005654 \\ GO:0005634 \\ GO:0055087 \\ GO:0005524 \\ GO:0004004 \\ GO:0003723 \\ GO:0006401 \\	RNA catabolic process (GO:0006401);	ATP binding (GO:0005524);ATP-dependent RNA helicase activity (GO:0004004);RNA binding (GO:0003723);	nucleoplasm (GO:0005654);nucleus (GO:0005634);Ski complex (GO:0055087);	ATP-binding;Complete proteome;Cytoplasm;Disease mutation;Helicase;Hydrolase;Nucleotide-binding;Nucleus;Phosphoprotein;Polymorphism;Reference proteome;RNA-binding.;		-0.0261118	4.35967	0.979505	1	513	561	537	SKIV2
Locus_10229_Transcript_1/1_Confidence_1.000_Length_1244	1244	No_sig_nr_hit	No_sig_nr_hit	No_sig_nr_hit	No_sig_nr_hit	No_Uniprotmatch	No_%_identity	No_evalue	No_ID	No_Description	No_KEGG	No_GO	No_GOCC	No_GOBP	No_GOMF	No_keywords		-0.222337	1.7906	0.806488	1	79	99	89	No
Locus_102293_Transcript_1/1_Confidence_1.000_Length_365	365	Locus_102293_Transcript_1/1_Confidence_1.000_Length_365	365	Locus_102293_Transcript_1/1_Confidence_1.000_Length_365	365	Q9NQZ8	60.169	1.01e-44	ZNF71_HUMAN	Endothelial zinc finger protein induced by tumor necrosis factor alpha	hsa:58491	GO:0005634 \\ GO:0003677 \\ GO:0046872 \\ GO:0003700 \\ GO:0006355 \\ GO:0006351 \\	regulation of transcription, DNA-templated (GO:0006355);transcription, DNA-templated (GO:0006351);	DNA binding (GO:0003677);metal ion binding (GO:0046872);transcription factor activity, sequence-specific DNA binding (GO:0003700);	nucleus (GO:0005634);	Complete proteome;DNA-binding;Metal-binding;Nucleus;Polymorphism;Reference proteome;Repeat;Transcription;Transcription regulation;Zinc;Zinc-finger.;		0.140928	0.591343	0.93182	1	38	37	37.5	ZNF71
Locus_1023_Transcript_2/6_Confidence_0.364_Length_1125	1125	Locus_1023_Transcript_2/6_Confidence_0.364_Length_1125	1125	Locus_1023_Transcript_2/6_Confidence_0.364_Length_1125	1125	O60688	100	5.33e-59	YPEL1_HUMAN	Protein yippee-like 1	hsa:29799	GO:0005634 \\	No_GOBP	No_GOMF	nucleus (GO:0005634);	Complete proteome;Metal-binding;Nucleus;Reference proteome;Zinc.;		-0.217786	-0.101281	0.891631	1	20	25	22.5	YPEL1
Locus_1023_Transcript_5/6_Confidence_0.273_Length_2536	2536	Locus_1023_Transcript_5/6_Confidence_0.273_Length_2536	2536	Locus_1023_Transcript_5/6_Confidence_0.273_Length_2536	2536	O60688	97.5	2.46e-18	YPEL1_HUMAN	Protein yippee-like 1	hsa:29799	GO:0005634 \\	No_GOBP	No_GOMF	nucleus (GO:0005634);	Complete proteome;Metal-binding;Nucleus;Reference proteome;Zinc.;		0.424003	1.31394	0.637774	1	70	56	63	YPEL1
Locus_1023_Transcript_6/6_Confidence_0.545_Length_6054	6054	Locus_1023_Transcript_6/6_Confidence_0.545_Length_6054	6054	Locus_1023_Transcript_6/6_Confidence_0.545_Length_6054	6054	O60688	100	1.21e-75	YPEL1_HUMAN	Protein yippee-like 1	hsa:29799	GO:0005634 \\	No_GOBP	No_GOMF	nucleus (GO:0005634);	Complete proteome;Metal-binding;Nucleus;Reference proteome;Zinc.;		0.124746	5.92116	0.882004	1	1598	1574	1586	YPEL1
Locus_10231_Transcript_1/5_Confidence_0.583_Length_3229	3229	Locus_10231_Transcript_1/5_Confidence_0.583_Length_3229	3229	Locus_10231_Transcript_1/5_Confidence_0.583_Length_3229	3229	A3KG59	74.57	8.07e-165	P20D2_MOUSE	Peptidase M20 domain-containing protein 2	mmu:242377	GO:0070062 \\ GO:0005654 \\ GO:0016787 \\	No_GOBP	hydrolase activity (GO:0016787);	extracellular exosome (GO:0070062);nucleoplasm (GO:0005654);	Alternative splicing;Complete proteome;Reference proteome.;		0.0958453	2.98449	0.920582	1	205	206	205.5	P20D2
Locus_10231_Transcript_4/5_Confidence_0.583_Length_3295	3295	Locus_10231_Transcript_4/5_Confidence_0.583_Length_3295	3295	Locus_10231_Transcript_4/5_Confidence_0.583_Length_3295	3295	Q501L1	70.958	2.05e-158	P20D2_XENTR	Peptidase M20 domain-containing protein 2	xtr:613074	No_GOcodes	No_GOBP	No_GOMF	No_GOCC	Complete proteome;Reference proteome.;		-0.0736554	3.13652	0.940353	1	215	243	229	P20D2
Locus_10231_Transcript_5/5_Confidence_0.583_Length_3159	3159	Locus_10231_Transcript_5/5_Confidence_0.583_Length_3159	3159	Locus_10231_Transcript_5/5_Confidence_0.583_Length_3159	3159	A3KG59	75	0	P20D2_MOUSE	Peptidase M20 domain-containing protein 2	mmu:242377	GO:0070062 \\ GO:0005654 \\ GO:0016787 \\	No_GOBP	hydrolase activity (GO:0016787);	extracellular exosome (GO:0070062);nucleoplasm (GO:0005654);	Alternative splicing;Complete proteome;Reference proteome.;		-0.204241	3.0868	0.815959	1	198	245	221.5	P20D2
Locus_10232_Transcript_1/3_Confidence_0.714_Length_4549	4549	Locus_10232_Transcript_1/3_Confidence_0.714_Length_4549	4549	Locus_10232_Transcript_1/3_Confidence_0.714_Length_4549	4549	O95786	53.498	0	DDX58_HUMAN	Probable ATP-dependent RNA helicase DDX58	hsa:23586	GO:0015629 \\ GO:0005923 \\ GO:0005737 \\ GO:0005829 \\ GO:0032587 \\ GO:0005524 \\ GO:0003690 \\ GO:0003725 \\ GO:0004386 \\ GO:0042802 \\ GO:0003727 \\ GO:0008270 \\ GO:0039528 \\ GO:0009597 \\ GO:0045087 \\ GO:0032480 \\ GO:0002230 \\ GO:0010628 \\ GO:0032725 \\ GO:0032727 \\ GO:0032728 \\ GO:0032755 \\ GO:0032757 \\ GO:0051091 \\ GO:0042993 \\ GO:0045944 \\ GO:0030334 \\ GO:0034344 \\ GO:0043…	cytoplasmic pattern recognition receptor signaling pathway in response to virus (GO:0039528);detection of virus (GO:0009597);innate immune response (GO:0045087);negative regulation of type I interferon production (GO:0032480);positive regulation of defense response to virus by host (GO:0002230);positive regulation of gene expression (GO:0010628);positive regulation of granulocyte macrophage colon…	ATP binding (GO:0005524);double-stranded DNA binding (GO:0003690);double-stranded RNA binding (GO:0003725);helicase activity (GO:0004386);identical protein binding (GO:0042802);single-stranded RNA binding (GO:0003727);zinc ion binding (GO:0008270);	actin cytoskeleton (GO:0015629);bicellular tight junction (GO:0005923);cytoplasm (GO:0005737);cytosol (GO:0005829);ruffle membrane (GO:0032587);	3D-structure;Acetylation;Alternative splicing;Antiviral defense;ATP-binding;Cell junction;Cell membrane;Cell projection;Complete proteome;Cytoplasm;Cytoskeleton;Disease mutation;Helicase;Host-virus interaction;Hydrolase;Immunity;Innate immunity;Isopeptide bond;Membrane;Metal-binding;Nucleotide-binding;Phosphoprotein;Polymorphism;Reference proteome;Repeat;RNA-binding;Tight junction;Ubl conjugation…		0.328841	2.16126	0.712954	1	124	106	115	DDX58
Locus_10233_Transcript_1/1_Confidence_1.000_Length_422	422	No_sig_nr_hit	No_sig_nr_hit	No_sig_nr_hit	No_sig_nr_hit	No_Uniprotmatch	No_%_identity	No_evalue	No_ID	No_Description	No_KEGG	No_GO	No_GOCC	No_GOBP	No_GOMF	No_keywords		0.0378053	2.94122	0.972708	1	195	204	199.5	No
Locus_10234_Transcript_4/5_Confidence_0.636_Length_3261	3261	Locus_10234_Transcript_4/5_Confidence_0.636_Length_3261	3261	Locus_10234_Transcript_4/5_Confidence_0.636_Length_3261	3261	Q6PE15	67.925	7.27e-93	ABHDA_MOUSE	Mycophenolic acid acyl-glucuronide esterase, mitochondrial	mmu:213012	GO:0005829 \\ GO:0005739 \\ GO:0004553 \\ GO:0019391 \\	glucuronoside catabolic process (GO:0019391);	hydrolase activity, hydrolyzing O-glycosyl compounds (GO:0004553);	cytosol (GO:0005829);mitochondrion (GO:0005739);	Alternative splicing;Complete proteome;Hydrolase;Mitochondrion;Reference proteome;Transit peptide.;		0.055491	4.02838	0.951697	1	419	433	426	ABHDA
Locus_10234_Transcript_5/5_Confidence_0.545_Length_3149	3149	Locus_10234_Transcript_5/5_Confidence_0.545_Length_3149	3149	Locus_10234_Transcript_5/5_Confidence_0.545_Length_3149	3149	Q6PE15	68.504	8.49e-114	ABHDA_MOUSE	Mycophenolic acid acyl-glucuronide esterase, mitochondrial	mmu:213012	GO:0005829 \\ GO:0005739 \\ GO:0004553 \\ GO:0019391 \\	glucuronoside catabolic process (GO:0019391);	hydrolase activity, hydrolyzing O-glycosyl compounds (GO:0004553);	cytosol (GO:0005829);mitochondrion (GO:0005739);	Alternative splicing;Complete proteome;Hydrolase;Mitochondrion;Reference proteome;Transit peptide.;		-0.0774121	4.02106	0.928785	1	398	451	424.5	ABHDA
Locus_10235_Transcript_1/2_Confidence_0.750_Length_2886	2886	Locus_10235_Transcript_1/2_Confidence_0.750_Length_2886	2886	Locus_10235_Transcript_1/2_Confidence_0.750_Length_2886	2886	Q6ZMT4	80.089	0	KDM7A_HUMAN	Lysine-specific demethylase 7A	hsa:80853	GO:0005730 \\ GO:0005654 \\ GO:0005634 \\ GO:0071558 \\ GO:0051864 \\ GO:0032454 \\ GO:0035575 \\ GO:0005506 \\ GO:0035064 \\ GO:0016706 \\ GO:0008270 \\ GO:0006325 \\ GO:0071557 \\ GO:0070544 \\ GO:0033169 \\ GO:0035574 \\ GO:0030901 \\ GO:0045893 \\ GO:0006351 \\	chromatin organization (GO:0006325);histone H3-K27 demethylation (GO:0071557);histone H3-K36 demethylation (GO:0070544);histone H3-K9 demethylation (GO:0033169);histone H4-K20 demethylation (GO:0035574);midbrain development (GO:0030901);positive regulation of transcription, DNA-templated (GO:0045893);transcription, DNA-templated (GO:0006351);	histone demethylase activity (H3-K27 specific) (GO:0071558);histone demethylase activity (H3-K36 specific) (GO:0051864);histone demethylase activity (H3-K9 specific) (GO:0032454);histone demethylase activity (H4-K20 specific) (GO:0035575);iron ion binding (GO:0005506);methylated histone binding (GO:0035064);oxidoreductase activity, acting on paired donors, with incorporation or reduction of molec…	nucleolus (GO:0005730);nucleoplasm (GO:0005654);nucleus (GO:0005634);	3D-structure;Alternative splicing;Chromatin regulator;Complete proteome;Dioxygenase;Iron;Metal-binding;Neurogenesis;Nucleus;Oxidoreductase;Polymorphism;Reference proteome;Transcription;Transcription regulation;Zinc;Zinc-finger.;		0.114595	3.24205	0.894815	1	247	245	246	KDM7A
Locus_10235_Transcript_2/2_Confidence_0.500_Length_1174	1174	Locus_10235_Transcript_2/2_Confidence_0.500_Length_1174	1174	Locus_10235_Transcript_2/2_Confidence_0.500_Length_1174	1174	Q6ZMT4	94.012	0	KDM7A_HUMAN	Lysine-specific demethylase 7A	hsa:80853	GO:0005730 \\ GO:0005654 \\ GO:0005634 \\ GO:0071558 \\ GO:0051864 \\ GO:0032454 \\ GO:0035575 \\ GO:0005506 \\ GO:0035064 \\ GO:0016706 \\ GO:0008270 \\ GO:0006325 \\ GO:0071557 \\ GO:0070544 \\ GO:0033169 \\ GO:0035574 \\ GO:0030901 \\ GO:0045893 \\ GO:0006351 \\	chromatin organization (GO:0006325);histone H3-K27 demethylation (GO:0071557);histone H3-K36 demethylation (GO:0070544);histone H3-K9 demethylation (GO:0033169);histone H4-K20 demethylation (GO:0035574);midbrain development (GO:0030901);positive regulation of transcription, DNA-templated (GO:0045893);transcription, DNA-templated (GO:0006351);	histone demethylase activity (H3-K27 specific) (GO:0071558);histone demethylase activity (H3-K36 specific) (GO:0051864);histone demethylase activity (H3-K9 specific) (GO:0032454);histone demethylase activity (H4-K20 specific) (GO:0035575);iron ion binding (GO:0005506);methylated histone binding (GO:0035064);oxidoreductase activity, acting on paired donors, with incorporation or reduction of molec…	nucleolus (GO:0005730);nucleoplasm (GO:0005654);nucleus (GO:0005634);	3D-structure;Alternative splicing;Chromatin regulator;Complete proteome;Dioxygenase;Iron;Metal-binding;Neurogenesis;Nucleus;Oxidoreductase;Polymorphism;Reference proteome;Transcription;Transcription regulation;Zinc;Zinc-finger.;		0.102173	-0.465299	0.930594	1	17	17	17	KDM7A
Locus_10236_Transcript_1/1_Confidence_1.000_Length_1683	1683	Locus_10236_Transcript_1/1_Confidence_1.000_Length_1683	1683	Locus_10236_Transcript_1/1_Confidence_1.000_Length_1683	1683	Q1T769	73.558	2.04e-77	MIS12_CHICK	Protein MIS12 homolog	gga:693254	GO:0000444 \\ GO:0000818 \\ GO:0051301 \\ GO:0007059 \\ GO:0051382 \\ GO:0000070 \\ GO:0007052 \\ GO:0034501 \\	cell division (GO:0051301);chromosome segregation (GO:0007059);kinetochore assembly (GO:0051382);mitotic sister chromatid segregation (GO:0000070);mitotic spindle organization (GO:0007052);protein localization to kinetochore (GO:0034501);	No_GOMF	MIS12/MIND type complex (GO:0000444);nuclear MIS12/MIND complex (GO:0000818);	Cell cycle;Cell division;Centromere;Chromosome;Chromosome partition;Coiled coil;Complete proteome;Kinetochore;Mitosis;Reference proteome.;		-0.0412082	-0.254947	1	1	19	21	20	MIS12
Locus_102366_Transcript_1/1_Confidence_1.000_Length_465	465	No_sig_nr_hit	No_sig_nr_hit	No_sig_nr_hit	No_sig_nr_hit	No_Uniprotmatch	No_%_identity	No_evalue	No_ID	No_Description	No_KEGG	No_GO	No_GOCC	No_GOBP	No_GOMF	No_keywords		0.446336	-0.853142	0.820975	1	14	11	12.5	No
Locus_10237_Transcript_3/5_Confidence_0.692_Length_5152	5152	Locus_10237_Transcript_3/5_Confidence_0.692_Length_5152	5152	Locus_10237_Transcript_3/5_Confidence_0.692_Length_5152	5152	Q96JH8	60.667	0	RADIL_HUMAN	Ras-associating and dilute domain-containing protein	hsa:55698	GO:0005874 \\ GO:0007275 \\ GO:0007165 \\ GO:0034446 \\	multicellular organismal development (GO:0007275);signal transduction (GO:0007165);substrate adhesion-dependent cell spreading (GO:0034446);	No_GOMF	microtubule (GO:0005874);	3D-structure;Alternative splicing;Cell adhesion;Complete proteome;Developmental protein;Phosphoprotein;Polymorphism;Reference proteome.;		0.184071	-0.42716	0.865045	1	18	17	17.5	RADIL
Locus_102371_Transcript_1/1_Confidence_1.000_Length_345	345	No_sig_nr_hit	No_sig_nr_hit	No_sig_nr_hit	No_sig_nr_hit	No_Uniprotmatch	No_%_identity	No_evalue	No_ID	No_Description	No_KEGG	No_GO	No_GOCC	No_GOBP	No_GOMF	No_keywords		0.513309	-0.710453	0.688767	1	16	12	14	No
Locus_10238_Transcript_1/3_Confidence_0.714_Length_4996	4996	Locus_10238_Transcript_1/3_Confidence_0.714_Length_4996	4996	Locus_10238_Transcript_1/3_Confidence_0.714_Length_4996	4996	Q96DB2	85.581	4.74e-124	HDA11_HUMAN	Histone deacetylase 11	hsa:79885	GO:0070062 \\ GO:0000118 \\ GO:0005634 \\ GO:0005886 \\ GO:0004407 \\ GO:0032041 \\ GO:0008134 \\ GO:0016568 \\ GO:0016575 \\ GO:0014003 \\ GO:0006355 \\ GO:0006351 \\	chromatin modification (GO:0016568);histone deacetylation (GO:0016575);oligodendrocyte development (GO:0014003);regulation of transcription, DNA-templated (GO:0006355);transcription, DNA-templated (GO:0006351);	histone deacetylase activity (GO:0004407);NAD-dependent histone deacetylase activity (H3-K14 specific) (GO:0032041);transcription factor binding (GO:0008134);	extracellular exosome (GO:0070062);histone deacetylase complex (GO:0000118);nucleus (GO:0005634);plasma membrane (GO:0005886);	Alternative splicing;Chromatin regulator;Complete proteome;Hydrolase;Nucleus;Reference proteome;Repressor;Transcription;Transcription regulation.;		-0.120707	2.69346	0.895217	1	155	181	168	HDA11
Locus_10238_Transcript_2/3_Confidence_0.714_Length_5175	5175	Locus_10238_Transcript_2/3_Confidence_0.714_Length_5175	5175	Locus_10238_Transcript_2/3_Confidence_0.714_Length_5175	5175	Q9GKU5	80.967	0	HDA11_MACFA	Histone deacetylase 11	mcf:102133368	GO:0005737 \\ GO:0000118 \\ GO:0005634 \\ GO:0004407 \\ GO:0032041 \\ GO:0008134 \\ GO:0016568 \\ GO:0016575 \\ GO:0006355 \\ GO:0006351 \\	chromatin modification (GO:0016568);histone deacetylation (GO:0016575);regulation of transcription, DNA-templated (GO:0006355);transcription, DNA-templated (GO:0006351);	histone deacetylase activity (GO:0004407);NAD-dependent histone deacetylase activity (H3-K14 specific) (GO:0032041);transcription factor binding (GO:0008134);	cytoplasm (GO:0005737);histone deacetylase complex (GO:0000118);nucleus (GO:0005634);	Chromatin regulator;Hydrolase;Nucleus;Repressor;Transcription;Transcription regulation.;		-0.303832	2.59413	0.7276	1	135	179	157	HDA11
Locus_1024_Transcript_1/4_Confidence_0.667_Length_1151	1151	Locus_1024_Transcript_1/4_Confidence_0.667_Length_1151	1151	Locus_1024_Transcript_1/4_Confidence_0.667_Length_1151	1151	Q566U4	58.131	3.17e-117	KFA_DANRE	Kynurenine formamidase {ECO:0000255|HAMAP-Rule:MF_03014}	dre:550372	GO:0005829 \\ GO:0005634 \\ GO:0004061 \\ GO:0034354 \\ GO:0019441 \\	'de novo' NAD biosynthetic process from tryptophan (GO:0034354);tryptophan catabolic process to kynurenine (GO:0019441);	arylformamidase activity (GO:0004061);	cytosol (GO:0005829);nucleus (GO:0005634);	Alternative splicing;Complete proteome;Cytoplasm;Hydrolase;Nucleus;Reference proteome;Tryptophan catabolism.;		0.10273	1.37481	0.939989	1	66	66	66	KFA
Locus_1024_Transcript_2/4_Confidence_0.556_Length_701	701	Locus_1024_Transcript_2/4_Confidence_0.556_Length_701	701	Locus_1024_Transcript_2/4_Confidence_0.556_Length_701	701	Q8K4H1	48.182	2.15e-22	KFA_MOUSE	Kynurenine formamidase {ECO:0000255|HAMAP-Rule:MF_03014}	mmu:71562	GO:0005737 \\ GO:0005829 \\ GO:0005634 \\ GO:0004061 \\ GO:0034354 \\ GO:0019441 \\	'de novo' NAD biosynthetic process from tryptophan (GO:0034354);tryptophan catabolic process to kynurenine (GO:0019441);	arylformamidase activity (GO:0004061);	cytoplasm (GO:0005737);cytosol (GO:0005829);nucleus (GO:0005634);	Alternative splicing;Complete proteome;Cytoplasm;Direct protein sequencing;Hydrolase;Nucleus;Reference proteome;Tryptophan catabolism.;		-1.08033	0.902857	0.23946	1	29	66	47.5	KFA
Locus_1024_Transcript_3/4_Confidence_0.556_Length_1127	1127	Locus_1024_Transcript_3/4_Confidence_0.556_Length_1127	1127	Locus_1024_Transcript_3/4_Confidence_0.556_Length_1127	1127	Q566U4	59.786	1.73e-120	KFA_DANRE	Kynurenine formamidase {ECO:0000255|HAMAP-Rule:MF_03014}	dre:550372	GO:0005829 \\ GO:0005634 \\ GO:0004061 \\ GO:0034354 \\ GO:0019441 \\	'de novo' NAD biosynthetic process from tryptophan (GO:0034354);tryptophan catabolic process to kynurenine (GO:0019441);	arylformamidase activity (GO:0004061);	cytosol (GO:0005829);nucleus (GO:0005634);	Alternative splicing;Complete proteome;Cytoplasm;Hydrolase;Nucleus;Reference proteome;Tryptophan catabolism.;		-0.12178	1.80779	0.896277	1	83	97	90	KFA
Locus_10240_Transcript_4/7_Confidence_0.400_Length_1733	1733	Locus_10240_Transcript_4/7_Confidence_0.400_Length_1733	1733	Locus_10240_Transcript_4/7_Confidence_0.400_Length_1733	1733	Q8TB37	81.818	4.35e-106	NUBPL_HUMAN	Iron-sulfur protein NUBPL	hsa:80224	GO:0005759 \\ GO:0005739 \\ GO:0051539 \\ GO:0005524 \\ GO:0046872 \\ GO:0044237 \\ GO:0032981 \\ GO:0070584 \\ GO:0022904 \\ GO:0044281 \\	cellular metabolic process (GO:0044237);mitochondrial respiratory chain complex I assembly (GO:0032981);mitochondrion morphogenesis (GO:0070584);respiratory electron transport chain (GO:0022904);small molecule metabolic process (GO:0044281);	4 iron, 4 sulfur cluster binding (GO:0051539);ATP binding (GO:0005524);metal ion binding (GO:0046872);	mitochondrial matrix (GO:0005759);mitochondrion (GO:0005739);	Alternative splicing;ATP-binding;Complete proteome;Disease mutation;Iron;Iron-sulfur;Metal-binding;Mitochondrion;Nucleotide-binding;Polymorphism;Reference proteome;Transit peptide.;		0.243807	3.18173	0.777094	1	247	224	235.5	NUBPL
Locus_10240_Transcript_7/7_Confidence_0.400_Length_1773	1773	Locus_10240_Transcript_7/7_Confidence_0.400_Length_1773	1773	Locus_10240_Transcript_7/7_Confidence_0.400_Length_1773	1773	Q8TB37	81.522	1.73e-145	NUBPL_HUMAN	Iron-sulfur protein NUBPL	hsa:80224	GO:0005759 \\ GO:0005739 \\ GO:0051539 \\ GO:0005524 \\ GO:0046872 \\ GO:0044237 \\ GO:0032981 \\ GO:0070584 \\ GO:0022904 \\ GO:0044281 \\	cellular metabolic process (GO:0044237);mitochondrial respiratory chain complex I assembly (GO:0032981);mitochondrion morphogenesis (GO:0070584);respiratory electron transport chain (GO:0022904);small molecule metabolic process (GO:0044281);	4 iron, 4 sulfur cluster binding (GO:0051539);ATP binding (GO:0005524);metal ion binding (GO:0046872);	mitochondrial matrix (GO:0005759);mitochondrion (GO:0005739);	Alternative splicing;ATP-binding;Complete proteome;Disease mutation;Iron;Iron-sulfur;Metal-binding;Mitochondrion;Nucleotide-binding;Polymorphism;Reference proteome;Transit peptide.;		0.0447204	3.25249	0.961472	1	243	253	248	NUBPL
Locus_102405_Transcript_1/1_Confidence_1.000_Length_362	362	No_sig_nr_hit	No_sig_nr_hit	No_sig_nr_hit	No_sig_nr_hit	No_Uniprotmatch	No_%_identity	No_evalue	No_ID	No_Description	No_KEGG	No_GO	No_GOCC	No_GOBP	No_GOMF	No_keywords		0.440687	-0.462659	0.661955	1	19	15	17	No
Locus_10241_Transcript_2/3_Confidence_0.286_Length_645	645	No_sig_nr_hit	No_sig_nr_hit	No_sig_nr_hit	No_sig_nr_hit	No_Uniprotmatch	No_%_identity	No_evalue	No_ID	No_Description	No_KEGG	No_GO	No_GOCC	No_GOBP	No_GOMF	No_keywords		0.883664	-0.620254	0.444979	1	19	11	15	No
Locus_10241_Transcript_3/3_Confidence_0.714_Length_2300	2300	Locus_10241_Transcript_3/3_Confidence_0.714_Length_2300	2300	Locus_10241_Transcript_3/3_Confidence_0.714_Length_2300	2300	Q99967	69.925	1.85e-88	CITE2_HUMAN	Cbp/p300-interacting transactivator 2	hsa:10370	GO:0005737 \\ GO:0000790 \\ GO:0005634 \\ GO:0003682 \\ GO:0035035 \\ GO:0050693 \\ GO:0001105 \\ GO:0001106 \\ GO:0003713 \\ GO:0003714 \\ GO:0003700 \\ GO:0035802 \\ GO:0030154 \\ GO:0008283 \\ GO:0007368 \\ GO:0060971 \\ GO:0007507 \\ GO:0070986 \\ GO:0060972 \\ GO:0001889 \\ GO:0043066 \\ GO:0030336 \\ GO:0010629 \\ GO:0000122 \\ GO:0061428 \\ GO:0045892 \\ GO:1900164 \\ GO:0003151 \\ GO:0045…	adrenal cortex formation (GO:0035802);cell differentiation (GO:0030154);cell proliferation (GO:0008283);determination of left/right symmetry (GO:0007368);embryonic heart tube left/right pattern formation (GO:0060971);heart development (GO:0007507);left/right axis specification (GO:0070986);left/right pattern formation (GO:0060972);liver development (GO:0001889);negative regulation of apoptotic pr…	chromatin binding (GO:0003682);histone acetyltransferase binding (GO:0035035);LBD domain binding (GO:0050693);RNA polymerase II transcription coactivator activity (GO:0001105);RNA polymerase II transcription corepressor activity (GO:0001106);transcription coactivator activity (GO:0003713);transcription corepressor activity (GO:0003714);transcription factor activity, sequence-specific DNA binding …	cytoplasm (GO:0005737);nuclear chromatin (GO:0000790);nucleus (GO:0005634);	3D-structure;Activator;Alternative splicing;Atrial septal defect;Complete proteome;Developmental protein;Differentiation;Disease mutation;Nucleus;Reference proteome;Repressor;Stress response;Transcription;Transcription regulation.;		-0.0112215	4.73183	0.990098	1	668	723	695.5	CITE2
Locus_10242_Transcript_2/6_Confidence_0.267_Length_1011	1011	Locus_10242_Transcript_2/6_Confidence_0.267_Length_1011	1011	Locus_10242_Transcript_2/6_Confidence_0.267_Length_1011	1011	Q3MHE2	90.541	9.33e-130	PRP4_BOVIN	U4/U6 small nuclear ribonucleoprotein Prp4	bta:508735	GO:0015030 \\ GO:0016607 \\ GO:0005681 \\ GO:0097525 \\ GO:0071001 \\ GO:0046540 \\ GO:0030621 \\ GO:0017070 \\ GO:0000398 \\	mRNA splicing, via spliceosome (GO:0000398);	U4 snRNA binding (GO:0030621);U6 snRNA binding (GO:0017070);	Cajal body (GO:0015030);nuclear speck (GO:0016607);spliceosomal complex (GO:0005681);spliceosomal snRNP complex (GO:0097525);U4/U6 snRNP (GO:0071001);U4/U6 x U5 tri-snRNP complex (GO:0046540);	Acetylation;Complete proteome;mRNA processing;mRNA splicing;Nucleus;Reference proteome;Repeat;Spliceosome;WD repeat.;		-0.0124289	-0.856127	1	1	12	13	12.5	PRP4
Locus_10242_Transcript_3/6_Confidence_0.133_Length_1362	1362	Locus_10242_Transcript_3/6_Confidence_0.133_Length_1362	1362	Locus_10242_Transcript_3/6_Confidence_0.133_Length_1362	1362	Q5NVD0	94.964	2.28e-89	PRP4_PONAB	U4/U6 small nuclear ribonucleoprotein Prp4	pon:100174168	GO:0016607 \\ GO:0005681 \\ GO:0097525 \\ GO:0071001 \\ GO:0006397 \\ GO:0008380 \\	mRNA processing (GO:0006397);RNA splicing (GO:0008380);	No_GOMF	nuclear speck (GO:0016607);spliceosomal complex (GO:0005681);spliceosomal snRNP complex (GO:0097525);U4/U6 snRNP (GO:0071001);	Acetylation;Complete proteome;mRNA processing;mRNA splicing;Nucleus;Reference proteome;Repeat;Spliceosome;WD repeat.;		-0.523504	0.739365	0.583468	1	33	51	42	PRP4
Locus_10242_Transcript_4/6_Confidence_0.400_Length_1613	1613	Locus_10242_Transcript_4/6_Confidence_0.400_Length_1613	1613	Locus_10242_Transcript_4/6_Confidence_0.400_Length_1613	1613	Q3MHE2	90.106	7.63e-172	PRP4_BOVIN	U4/U6 small nuclear ribonucleoprotein Prp4	bta:508735	GO:0015030 \\ GO:0016607 \\ GO:0005681 \\ GO:0097525 \\ GO:0071001 \\ GO:0046540 \\ GO:0030621 \\ GO:0017070 \\ GO:0000398 \\	mRNA splicing, via spliceosome (GO:0000398);	U4 snRNA binding (GO:0030621);U6 snRNA binding (GO:0017070);	Cajal body (GO:0015030);nuclear speck (GO:0016607);spliceosomal complex (GO:0005681);spliceosomal snRNP complex (GO:0097525);U4/U6 snRNP (GO:0071001);U4/U6 x U5 tri-snRNP complex (GO:0046540);	Acetylation;Complete proteome;mRNA processing;mRNA splicing;Nucleus;Reference proteome;Repeat;Spliceosome;WD repeat.;		-0.341209	-0.809395	0.820975	1	11	15	13	PRP4
Locus_10242_Transcript_5/6_Confidence_0.600_Length_3265	3265	Locus_10242_Transcript_5/6_Confidence_0.600_Length_3265	3265	Locus_10242_Transcript_5/6_Confidence_0.600_Length_3265	3265	O43172	92.835	0	PRP4_HUMAN	U4/U6 small nuclear ribonucleoprotein Prp4	hsa:9128	GO:0015030 \\ GO:0016607 \\ GO:0005654 \\ GO:0005634 \\ GO:0005681 \\ GO:0097525 \\ GO:0071001 \\ GO:0046540 \\ GO:0030621 \\ GO:0017070 \\ GO:0010467 \\ GO:0000398 \\ GO:0006396 \\ GO:0008380 \\ GO:0000375 \\	gene expression (GO:0010467);mRNA splicing, via spliceosome (GO:0000398);RNA processing (GO:0006396);RNA splicing (GO:0008380);RNA splicing, via transesterification reactions (GO:0000375);	U4 snRNA binding (GO:0030621);U6 snRNA binding (GO:0017070);	Cajal body (GO:0015030);nuclear speck (GO:0016607);nucleoplasm (GO:0005654);nucleus (GO:0005634);spliceosomal complex (GO:0005681);spliceosomal snRNP complex (GO:0097525);U4/U6 snRNP (GO:0071001);U4/U6 x U5 tri-snRNP complex (GO:0046540);	3D-structure;Acetylation;Alternative splicing;Complete proteome;Direct protein sequencing;Disease mutation;mRNA processing;mRNA splicing;Nucleus;Reference proteome;Repeat;Retinitis pigmentosa;Spliceosome;WD repeat.;		-0.168048	1.32814	0.856361	1	58	70	64	PRP4
Locus_10242_Transcript_6/6_Confidence_0.467_Length_2471	2471	Locus_10242_Transcript_6/6_Confidence_0.467_Length_2471	2471	Locus_10242_Transcript_6/6_Confidence_0.467_Length_2471	2471	O43172	91.481	0	PRP4_HUMAN	U4/U6 small nuclear ribonucleoprotein Prp4	hsa:9128	GO:0015030 \\ GO:0016607 \\ GO:0005654 \\ GO:0005634 \\ GO:0005681 \\ GO:0097525 \\ GO:0071001 \\ GO:0046540 \\ GO:0030621 \\ GO:0017070 \\ GO:0010467 \\ GO:0000398 \\ GO:0006396 \\ GO:0008380 \\ GO:0000375 \\	gene expression (GO:0010467);mRNA splicing, via spliceosome (GO:0000398);RNA processing (GO:0006396);RNA splicing (GO:0008380);RNA splicing, via transesterification reactions (GO:0000375);	U4 snRNA binding (GO:0030621);U6 snRNA binding (GO:0017070);	Cajal body (GO:0015030);nuclear speck (GO:0016607);nucleoplasm (GO:0005654);nucleus (GO:0005634);spliceosomal complex (GO:0005681);spliceosomal snRNP complex (GO:0097525);U4/U6 snRNP (GO:0071001);U4/U6 x U5 tri-snRNP complex (GO:0046540);	3D-structure;Acetylation;Alternative splicing;Complete proteome;Direct protein sequencing;Disease mutation;mRNA processing;mRNA splicing;Nucleus;Reference proteome;Repeat;Retinitis pigmentosa;Spliceosome;WD repeat.;		-0.338395	1.29277	0.728484	1	53	72	62.5	PRP4
Locus_102424_Transcript_1/1_Confidence_1.000_Length_246	246	No_sig_nr_hit	No_sig_nr_hit	No_sig_nr_hit	No_sig_nr_hit	No_Uniprotmatch	No_%_identity	No_evalue	No_ID	No_Description	No_KEGG	No_GO	No_GOCC	No_GOBP	No_GOMF	No_keywords		-0.272597	-0.960813	0.808417	1	10	13	11.5	No
Locus_10243_Transcript_3/7_Confidence_0.611_Length_4696	4696	Locus_10243_Transcript_3/7_Confidence_0.611_Length_4696	4696	Locus_10243_Transcript_3/7_Confidence_0.611_Length_4696	4696	Q9H6Q4	73.729	0	NARFL_HUMAN	Cytosolic Fe-S cluster assembly factor NARFL	hsa:64428	GO:0097361 \\ GO:0051539 \\ GO:0051536 \\ GO:0046872 \\ GO:0002244 \\ GO:0016226 \\ GO:0032364 \\ GO:0006355 \\ GO:0001666 \\ GO:0044281 \\	hematopoietic progenitor cell differentiation (GO:0002244);iron-sulfur cluster assembly (GO:0016226);oxygen homeostasis (GO:0032364);regulation of transcription, DNA-templated (GO:0006355);response to hypoxia (GO:0001666);small molecule metabolic process (GO:0044281);	4 iron, 4 sulfur cluster binding (GO:0051539);iron-sulfur cluster binding (GO:0051536);metal ion binding (GO:0046872);	CIA complex (GO:0097361);	4Fe-4S;Acetylation;Alternative splicing;Complete proteome;Iron;Iron-sulfur;Metal-binding;Polymorphism;Reference proteome.;		0.0123146	3.09995	0.993885	1	216	230	223	NARFL
Locus_10243_Transcript_6/7_Confidence_0.611_Length_5081	5081	Locus_10243_Transcript_6/7_Confidence_0.611_Length_5081	5081	Locus_10243_Transcript_6/7_Confidence_0.611_Length_5081	5081	A4FV58	72.764	6.35e-117	NARFL_BOVIN	Cytosolic Fe-S cluster assembly factor NARFL	bta:511837	GO:0097361 \\ GO:0005829 \\ GO:0051539 \\ GO:0051536 \\ GO:0046872 \\ GO:0002244 \\ GO:0016226 \\ GO:0032364 \\ GO:0006355 \\ GO:0001666 \\	hematopoietic progenitor cell differentiation (GO:0002244);iron-sulfur cluster assembly (GO:0016226);oxygen homeostasis (GO:0032364);regulation of transcription, DNA-templated (GO:0006355);response to hypoxia (GO:0001666);	4 iron, 4 sulfur cluster binding (GO:0051539);iron-sulfur cluster binding (GO:0051536);metal ion binding (GO:0046872);	CIA complex (GO:0097361);cytosol (GO:0005829);	4Fe-4S;Acetylation;Alternative splicing;Complete proteome;Iron;Iron-sulfur;Metal-binding;Reference proteome.;		0.19071	2.92566	0.82844	1	203	191	197	NARFL
Locus_102434_Transcript_1/1_Confidence_1.000_Length_326	326	No_sig_nr_hit	No_sig_nr_hit	No_sig_nr_hit	No_sig_nr_hit	No_Uniprotmatch	No_%_identity	No_evalue	No_ID	No_Description	No_KEGG	No_GO	No_GOCC	No_GOBP	No_GOMF	No_keywords		-0.179982	0.065609	0.903071	1	23	28	25.5	No
Locus_10244_Transcript_1/3_Confidence_0.667_Length_1171	1171	Locus_10244_Transcript_1/3_Confidence_0.667_Length_1171	1171	Locus_10244_Transcript_1/3_Confidence_0.667_Length_1171	1171	O14519	83.962	9.28e-53	CDKA1_HUMAN	Cyclin-dependent kinase 2-associated protein 1	hsa:8099	GO:0005634 \\ GO:0048471 \\ GO:0070182 \\ GO:0007049 \\ GO:0006261 \\ GO:0001934 \\	cell cycle (GO:0007049);DNA-dependent DNA replication (GO:0006261);positive regulation of protein phosphorylation (GO:0001934);	DNA polymerase binding (GO:0070182);	nucleus (GO:0005634);perinuclear region of cytoplasm (GO:0048471);	3D-structure;Alternative splicing;Cell cycle;Complete proteome;Disulfide bond;Phosphoprotein;Reference proteome;Tumor suppressor.;		0.0929132	4.05408	0.914743	1	432	435	433.5	CDKA1
Locus_10244_Transcript_2/3_Confidence_0.667_Length_1332	1332	Locus_10244_Transcript_2/3_Confidence_0.667_Length_1332	1332	Locus_10244_Transcript_2/3_Confidence_0.667_Length_1332	1332	O14519	87.611	1.74e-60	CDKA1_HUMAN	Cyclin-dependent kinase 2-associated protein 1	hsa:8099	GO:0005634 \\ GO:0048471 \\ GO:0070182 \\ GO:0007049 \\ GO:0006261 \\ GO:0001934 \\	cell cycle (GO:0007049);DNA-dependent DNA replication (GO:0006261);positive regulation of protein phosphorylation (GO:0001934);	DNA polymerase binding (GO:0070182);	nucleus (GO:0005634);perinuclear region of cytoplasm (GO:0048471);	3D-structure;Alternative splicing;Cell cycle;Complete proteome;Disulfide bond;Phosphoprotein;Reference proteome;Tumor suppressor.;		-0.0173657	4.19857	0.988541	1	460	500	480	CDKA1
Locus_102442_Transcript_1/1_Confidence_1.000_Length_868	868	No_sig_nr_hit	No_sig_nr_hit	No_sig_nr_hit	No_sig_nr_hit	No_Uniprotmatch	No_%_identity	No_evalue	No_ID	No_Description	No_KEGG	No_GO	No_GOCC	No_GOBP	No_GOMF	No_keywords		-0.377369	1.17596	0.687677	1	48	67	57.5	No
Locus_10245_Transcript_10/10_Confidence_0.486_Length_4015	4015	Locus_10245_Transcript_10/10_Confidence_0.486_Length_4015	4015	Locus_10245_Transcript_10/10_Confidence_0.486_Length_4015	4015	Q9NVF7	91.582	1.48e-165	FBX28_HUMAN	F-box only protein 28	hsa:23219	No_GOcodes	No_GOBP	No_GOMF	No_GOCC	Alternative splicing;Complete proteome;Phosphoprotein;Polymorphism;Reference proteome;Ubl conjugation pathway.;		-0.413939	1.07521	0.666685	1	44	63	53.5	FBX28
Locus_10245_Transcript_2/10_Confidence_0.514_Length_4123	4123	Locus_10245_Transcript_2/10_Confidence_0.514_Length_4123	4123	Locus_10245_Transcript_2/10_Confidence_0.514_Length_4123	4123	Q9NVF7	81.381	2.42e-158	FBX28_HUMAN	F-box only protein 28	hsa:23219	No_GOcodes	No_GOBP	No_GOMF	No_GOCC	Alternative splicing;Complete proteome;Phosphoprotein;Polymorphism;Reference proteome;Ubl conjugation pathway.;		0.184946	1.05649	0.851408	1	54	51	52.5	FBX28
Locus_10245_Transcript_4/10_Confidence_0.600_Length_4625	4625	Locus_10245_Transcript_4/10_Confidence_0.600_Length_4625	4625	Locus_10245_Transcript_4/10_Confidence_0.600_Length_4625	4625	Q2NL16	94.382	1.87e-110	FBX28_BOVIN	F-box only protein 28	bta:537745	No_GOcodes	No_GOBP	No_GOMF	No_GOCC	Complete proteome;Phosphoprotein;Reference proteome;Ubl conjugation pathway.;		0.251139	0.947272	0.787629	1	51	46	48.5	FBX28
Locus_10245_Transcript_6/10_Confidence_0.486_Length_4419	4419	Locus_10245_Transcript_6/10_Confidence_0.486_Length_4419	4419	Locus_10245_Transcript_6/10_Confidence_0.486_Length_4419	4419	Q9NVF7	91.739	7.35e-117	FBX28_HUMAN	F-box only protein 28	hsa:23219	No_GOcodes	No_GOBP	No_GOMF	No_GOCC	Alternative splicing;Complete proteome;Phosphoprotein;Polymorphism;Reference proteome;Ubl conjugation pathway.;		0.423938	1.21032	0.651	1	65	52	58.5	FBX28
Locus_10245_Transcript_8/10_Confidence_0.429_Length_3041	3041	Locus_10245_Transcript_8/10_Confidence_0.429_Length_3041	3041	Locus_10245_Transcript_8/10_Confidence_0.429_Length_3041	3041	Q9NVF7	91.775	2.7e-120	FBX28_HUMAN	F-box only protein 28	hsa:23219	No_GOcodes	No_GOBP	No_GOMF	No_GOCC	Alternative splicing;Complete proteome;Phosphoprotein;Polymorphism;Reference proteome;Ubl conjugation pathway.;		0.0450958	0.986973	0.973937	1	49	51	50	FBX28
Locus_10245_Transcript_9/10_Confidence_0.486_Length_4803	4803	Locus_10245_Transcript_9/10_Confidence_0.486_Length_4803	4803	Locus_10245_Transcript_9/10_Confidence_0.486_Length_4803	4803	Q9NVF7	92.884	1.81e-145	FBX28_HUMAN	F-box only protein 28	hsa:23219	No_GOcodes	No_GOBP	No_GOMF	No_GOCC	Alternative splicing;Complete proteome;Phosphoprotein;Polymorphism;Reference proteome;Ubl conjugation pathway.;		0.242512	1.03048	0.799104	1	54	49	51.5	FBX28
Locus_10246_Transcript_1/2_Confidence_0.833_Length_2303	2303	No_sig_nr_hit	No_sig_nr_hit	No_sig_nr_hit	No_sig_nr_hit	No_Uniprotmatch	No_%_identity	No_evalue	No_ID	No_Description	No_KEGG	No_GO	No_GOCC	No_GOBP	No_GOMF	No_keywords		0.328162	1.33472	0.736322	1	69	59	64	No
Locus_10247_Transcript_1/2_Confidence_0.750_Length_4745	4745	Locus_10247_Transcript_1/2_Confidence_0.750_Length_4745	4745	Locus_10247_Transcript_1/2_Confidence_0.750_Length_4745	4745	O35431	81.722	0	APBA2_RAT	Amyloid beta A4 precursor protein-binding family A member 2	rno:83610	GO:0005886 \\ GO:0008021 \\ GO:0001540 \\ GO:0005546 \\ GO:0001701 \\ GO:0007626 \\ GO:0035264 \\ GO:0015031 \\ GO:0010468 \\ GO:0016079 \\	in utero embryonic development (GO:0001701);locomotory behavior (GO:0007626);multicellular organism growth (GO:0035264);protein transport (GO:0015031);regulation of gene expression (GO:0010468);synaptic vesicle exocytosis (GO:0016079);	beta-amyloid binding (GO:0001540);phosphatidylinositol-4,5-bisphosphate binding (GO:0005546);	plasma membrane (GO:0005886);synaptic vesicle (GO:0008021);	3D-structure;Complete proteome;Protein transport;Reference proteome;Repeat;Transport.;		-0.0693075	4.48691	0.936693	1	552	622	587	APBA2
Locus_10248_Transcript_1/3_Confidence_0.750_Length_3058	3058	Locus_10248_Transcript_1/3_Confidence_0.750_Length_3058	3058	Locus_10248_Transcript_1/3_Confidence_0.750_Length_3058	3058	Q6GL41	89.56	0	MCM4_XENTR	DNA replication licensing factor mcm4	xtr:448137	GO:0000785 \\ GO:0042555 \\ GO:0005634 \\ GO:0005524 \\ GO:0003677 \\ GO:0003678 \\ GO:0046872 \\ GO:0007049 \\ GO:0006270 \\ GO:0006268 \\ GO:0030174 \\	cell cycle (GO:0007049);DNA replication initiation (GO:0006270);DNA unwinding involved in DNA replication (GO:0006268);regulation of DNA-dependent DNA replication initiation (GO:0030174);	ATP binding (GO:0005524);DNA binding (GO:0003677);DNA helicase activity (GO:0003678);metal ion binding (GO:0046872);	chromatin (GO:0000785);MCM complex (GO:0042555);nucleus (GO:0005634);	ATP-binding;Cell cycle;Complete proteome;DNA replication;DNA-binding;Helicase;Hydrolase;Metal-binding;Nucleotide-binding;Nucleus;Phosphoprotein;Reference proteome;Zinc;Zinc-finger.;		-0.381605	1.08853	0.691965	1	45	63	54	MCM4
Locus_10248_Transcript_2/3_Confidence_0.750_Length_2973	2973	Locus_10248_Transcript_2/3_Confidence_0.750_Length_2973	2973	Locus_10248_Transcript_2/3_Confidence_0.750_Length_2973	2973	Q6GL41	86.889	0	MCM4_XENTR	DNA replication licensing factor mcm4	xtr:448137	GO:0000785 \\ GO:0042555 \\ GO:0005634 \\ GO:0005524 \\ GO:0003677 \\ GO:0003678 \\ GO:0046872 \\ GO:0007049 \\ GO:0006270 \\ GO:0006268 \\ GO:0030174 \\	cell cycle (GO:0007049);DNA replication initiation (GO:0006270);DNA unwinding involved in DNA replication (GO:0006268);regulation of DNA-dependent DNA replication initiation (GO:0030174);	ATP binding (GO:0005524);DNA binding (GO:0003677);DNA helicase activity (GO:0003678);metal ion binding (GO:0046872);	chromatin (GO:0000785);MCM complex (GO:0042555);nucleus (GO:0005634);	ATP-binding;Cell cycle;Complete proteome;DNA replication;DNA-binding;Helicase;Hydrolase;Metal-binding;Nucleotide-binding;Nucleus;Phosphoprotein;Reference proteome;Zinc;Zinc-finger.;		-0.894486	0.875467	0.330413	1	31	62	46.5	MCM4
Locus_102483_Transcript_1/1_Confidence_1.000_Length_548	548	No_sig_nr_hit	No_sig_nr_hit	No_sig_nr_hit	No_sig_nr_hit	No_Uniprotmatch	No_%_identity	No_evalue	No_ID	No_Description	No_KEGG	No_GO	No_GOCC	No_GOBP	No_GOMF	No_keywords		0.194464	-0.583299	0.850328	1	16	15	15.5	No
Locus_10249_Transcript_1/4_Confidence_0.444_Length_4122	4122	Locus_10249_Transcript_1/4_Confidence_0.444_Length_4122	4122	Locus_10249_Transcript_1/4_Confidence_0.444_Length_4122	4122	Q9BVG8	80.69	0	KIFC3_HUMAN	Kinesin-like protein KIFC3	hsa:3801	GO:0005813 \\ GO:0030659 \\ GO:0070062 \\ GO:0005794 \\ GO:0005871 \\ GO:0005874 \\ GO:0005915 \\ GO:0005524 \\ GO:0016887 \\ GO:0003777 \\ GO:0090136 \\ GO:0007030 \\ GO:0007018 \\ GO:0007601 \\ GO:0045218 \\	epithelial cell-cell adhesion (GO:0090136);Golgi organization (GO:0007030);microtubule-based movement (GO:0007018);visual perception (GO:0007601);zonula adherens maintenance (GO:0045218);	ATP binding (GO:0005524);ATPase activity (GO:0016887);microtubule motor activity (GO:0003777);	centrosome (GO:0005813);cytoplasmic vesicle membrane (GO:0030659);extracellular exosome (GO:0070062);Golgi apparatus (GO:0005794);kinesin complex (GO:0005871);microtubule (GO:0005874);zonula adherens (GO:0005915);	3D-structure;Alternative splicing;ATP-binding;Cell junction;Coiled coil;Complete proteome;Cytoplasm;Cytoplasmic vesicle;Cytoskeleton;Membrane;Microtubule;Motor protein;Nucleotide-binding;Polymorphism;Reference proteome.;		-0.351664	1.51959	0.69765	1	62	85	73.5	KIFC3
Locus_10249_Transcript_2/4_Confidence_0.333_Length_1140	1140	No_sig_nr_hit	No_sig_nr_hit	No_sig_nr_hit	No_sig_nr_hit	No_Uniprotmatch	No_%_identity	No_evalue	No_ID	No_Description	No_KEGG	No_GO	No_GOCC	No_GOBP	No_GOMF	No_keywords		0.102368	-0.0692323	0.946758	1	23	23	23	No
Locus_10249_Transcript_4/4_Confidence_0.667_Length_4093	4093	Locus_10249_Transcript_4/4_Confidence_0.667_Length_4093	4093	Locus_10249_Transcript_4/4_Confidence_0.667_Length_4093	4093	Q9BVG8	80.601	0	KIFC3_HUMAN	Kinesin-like protein KIFC3	hsa:3801	GO:0005813 \\ GO:0030659 \\ GO:0070062 \\ GO:0005794 \\ GO:0005871 \\ GO:0005874 \\ GO:0005915 \\ GO:0005524 \\ GO:0016887 \\ GO:0003777 \\ GO:0090136 \\ GO:0007030 \\ GO:0007018 \\ GO:0007601 \\ GO:0045218 \\	epithelial cell-cell adhesion (GO:0090136);Golgi organization (GO:0007030);microtubule-based movement (GO:0007018);visual perception (GO:0007601);zonula adherens maintenance (GO:0045218);	ATP binding (GO:0005524);ATPase activity (GO:0016887);microtubule motor activity (GO:0003777);	centrosome (GO:0005813);cytoplasmic vesicle membrane (GO:0030659);extracellular exosome (GO:0070062);Golgi apparatus (GO:0005794);kinesin complex (GO:0005871);microtubule (GO:0005874);zonula adherens (GO:0005915);	3D-structure;Alternative splicing;ATP-binding;Cell junction;Coiled coil;Complete proteome;Cytoplasm;Cytoplasmic vesicle;Cytoskeleton;Membrane;Microtubule;Motor protein;Nucleotide-binding;Polymorphism;Reference proteome.;		-0.178002	1.76726	0.848166	1	79	96	87.5	KIFC3
Locus_1025_Transcript_1/1_Confidence_1.000_Length_2119	2119	Locus_1025_Transcript_1/1_Confidence_1.000_Length_2119	2119	Locus_1025_Transcript_1/1_Confidence_1.000_Length_2119	2119	Q6RI85	82.443	0	PGK2_PIG	Phosphoglycerate kinase 2	ssc:396673	GO:0005737 \\ GO:0005524 \\ GO:0004618 \\ GO:0006096 \\ GO:0016310 \\	glycolytic process (GO:0006096);phosphorylation (GO:0016310);	ATP binding (GO:0005524);phosphoglycerate kinase activity (GO:0004618);	cytoplasm (GO:0005737);	ATP-binding;Complete proteome;Cytoplasm;Glycolysis;Kinase;Nucleotide-binding;Polymorphism;Reference proteome;Transferase.;		-0.000908205	8.79579	0.999249	1	11243	12082	11662.5	PGK2
Locus_10251_Transcript_1/3_Confidence_0.154_Length_603	603	No_sig_nr_hit	No_sig_nr_hit	No_sig_nr_hit	No_sig_nr_hit	No_Uniprotmatch	No_%_identity	No_evalue	No_ID	No_Description	No_KEGG	No_GO	No_GOCC	No_GOBP	No_GOMF	No_keywords		0.39079	0.290001	0.712306	1	33	27	30	No
Locus_10251_Transcript_3/3_Confidence_0.846_Length_1142	1142	No_sig_nr_hit	No_sig_nr_hit	No_sig_nr_hit	No_sig_nr_hit	No_Uniprotmatch	No_%_identity	No_evalue	No_ID	No_Description	No_KEGG	No_GO	No_GOCC	No_GOBP	No_GOMF	No_keywords		0.163455	-0.0400877	0.895734	1	24	23	23.5	No
Locus_10252_Transcript_1/3_Confidence_0.667_Length_2590	2590	Locus_10252_Transcript_1/3_Confidence_0.667_Length_2590	2590	Locus_10252_Transcript_1/3_Confidence_0.667_Length_2590	2590	O95198	89.127	0	KLHL2_HUMAN	Kelch-like protein 2	hsa:11275	GO:0015629 \\ GO:0031463 \\ GO:0005737 \\ GO:0005829 \\ GO:0030027 \\ GO:0001726 \\ GO:0003779 \\ GO:0016567 \\	protein ubiquitination (GO:0016567);	actin binding (GO:0003779);	actin cytoskeleton (GO:0015629);Cul3-RING ubiquitin ligase complex (GO:0031463);cytoplasm (GO:0005737);cytosol (GO:0005829);lamellipodium (GO:0030027);ruffle (GO:0001726);	3D-structure;Actin-binding;Alternative splicing;Cell projection;Complete proteome;Cytoplasm;Cytoskeleton;Kelch repeat;Reference proteome;Repeat;Ubl conjugation pathway.;		0.346729	1.48052	0.709214	1	77	65	71	KLHL2
Locus_10252_Transcript_2/3_Confidence_0.333_Length_1939	1939	Locus_10252_Transcript_2/3_Confidence_0.333_Length_1939	1939	Locus_10252_Transcript_2/3_Confidence_0.333_Length_1939	1939	O95198	92.381	3.1e-57	KLHL2_HUMAN	Kelch-like protein 2	hsa:11275	GO:0015629 \\ GO:0031463 \\ GO:0005737 \\ GO:0005829 \\ GO:0030027 \\ GO:0001726 \\ GO:0003779 \\ GO:0016567 \\	protein ubiquitination (GO:0016567);	actin binding (GO:0003779);	actin cytoskeleton (GO:0015629);Cul3-RING ubiquitin ligase complex (GO:0031463);cytoplasm (GO:0005737);cytosol (GO:0005829);lamellipodium (GO:0030027);ruffle (GO:0001726);	3D-structure;Actin-binding;Alternative splicing;Cell projection;Complete proteome;Cytoplasm;Cytoskeleton;Kelch repeat;Reference proteome;Repeat;Ubl conjugation pathway.;		0.452663	0.4201	0.663602	1	37	29	33	KLHL2
[truncated: 34,556 more rows]
