# Supplementary material for: Characterization of a de novo assembled transcriptome of the Common Blackbird (Turdus merula)
Source: PeerJ. 2017 Dec 13;5:e4045. doi: 10.7717/peerj.4045 (PMC5732540; doi:10.7717/peerj.4045)
Supplement: Table S4 [file peerj-05-4045-s004.xlsx]

## Sheet: genelist liver
ContigName	ContigLength	topnrMatch	topnrEvalue	nobadwordnrMatch	nobadwordnrEvalue	Uniprotmatch	X._identity	evalue	ID	Description	KEGG	GO	GOCC	GOBP	GOMF	Keywords	X	logFC	logCPM	PValue	FDR	rcp557[, 2]	rcp558[, 2]	MeanCounts	Gene
Locus_1_Transcript_2/4_Confidence_0.700_Length_9592	9592	Locus_1_Transcript_2/4_Confidence_0.700_Length_9592	9592	Locus_1_Transcript_2/4_Confidence_0.700_Length_9592	9592	Q8NB14	75.405	0	UBP38_HUMAN	Ubiquitin carboxyl-terminal hydrolase 38	hsa:84640	GO:0004843 \\ GO:0016579 \\ GO:0006511 \\	protein deubiquitination (GO:0016579);ubiquitin-dependent protein catabolic process (GO:0006511);	thiol-dependent ubiquitin-specific protease activity (GO:0004843);	No_GOCC	3D-structure;Alternative splicing;Complete proteome;Hydrolase;Protease;Reference proteome;Thiol protease;Ubl conjugation pathway.;		-0.375592	4.88636	0.655247	1	792	810	801	UBP38
Locus_10_Transcript_1/1_Confidence_1.000_Length_2691	2691	Locus_10_Transcript_1/1_Confidence_1.000_Length_2691	2691	Locus_10_Transcript_1/1_Confidence_1.000_Length_2691	2691	Q863B3	90	0	SND1_BOVIN	Staphylococcal nuclease domain-containing protein 1	bta:404098	GO:0097433 \\ GO:0070062 \\ GO:0042470 \\ GO:0016020 \\ GO:0005739 \\ GO:0005634 \\ GO:0016442 \\ GO:0004518 \\ GO:0044822 \\ GO:0031047 \\ GO:0001649 \\ GO:0006355 \\ GO:0006351 \\	gene silencing by RNA (GO:0031047);osteoblast differentiation (GO:0001649);regulation of transcription, DNA-templated (GO:0006355);transcription, DNA-templated (GO:0006351);	nuclease activity (GO:0004518);poly(A) RNA binding (GO:0044822);	dense body (GO:0097433);extracellular exosome (GO:0070062);melanosome (GO:0042470);membrane (GO:0016020);mitochondrion (GO:0005739);nucleus (GO:0005634);RISC complex (GO:0016442);	Acetylation;Complete proteome;Cytoplasm;Direct protein sequencing;Nucleus;Phosphoprotein;Reference proteome;Repeat;Transcription;Transcription regulation.;		0.220681	6.54572	0.791851	1	3097	2095	2596	SND1
Locus_100_Transcript_1/5_Confidence_0.500_Length_921	921	Locus_100_Transcript_1/5_Confidence_0.500_Length_921	921	Locus_100_Transcript_1/5_Confidence_0.500_Length_921	921	P83242	50	2.36e-11	MSMB_STRCA	Beta-microseminoprotein	No_KEGG	GO:0005576 \\	No_GOBP	No_GOMF	extracellular region (GO:0005576);	Amidation;Direct protein sequencing;Disulfide bond;Secreted.;		-0.757655	8.41275	0.365742	1	7807	10405	9106	MSMB
Locus_100_Transcript_2/5_Confidence_0.500_Length_755	755	Locus_100_Transcript_2/5_Confidence_0.500_Length_755	755	Locus_100_Transcript_2/5_Confidence_0.500_Length_755	755	P83242	56.977	3.45e-30	MSMB_STRCA	Beta-microseminoprotein	No_KEGG	GO:0005576 \\	No_GOBP	No_GOMF	extracellular region (GO:0005576);	Amidation;Direct protein sequencing;Disulfide bond;Secreted.;		-0.731917	8.33684	0.382096	1	7490	9806	8648	MSMB
Locus_100_Transcript_4/5_Confidence_0.250_Length_1207	1207	Locus_100_Transcript_4/5_Confidence_0.250_Length_1207	1207	Locus_100_Transcript_4/5_Confidence_0.250_Length_1207	1207	P83242	37.805	3.66e-13	MSMB_STRCA	Beta-microseminoprotein	No_KEGG	GO:0005576 \\	No_GOBP	No_GOMF	extracellular region (GO:0005576);	Amidation;Direct protein sequencing;Disulfide bond;Secreted.;		-0.233142	4.96783	0.781712	1	885	820	852.5	MSMB
Locus_100_Transcript_5/5_Confidence_0.167_Length_661	661	Locus_100_Transcript_5/5_Confidence_0.167_Length_661	661	Locus_100_Transcript_5/5_Confidence_0.167_Length_661	661	P83242	70.93	6.98e-41	MSMB_STRCA	Beta-microseminoprotein	No_KEGG	GO:0005576 \\	No_GOBP	No_GOMF	extracellular region (GO:0005576);	Amidation;Direct protein sequencing;Disulfide bond;Secreted.;		-0.568546	12.1155	0.496064	1	110173	128796	119484	MSMB
Locus_1000_Transcript_1/4_Confidence_0.700_Length_3807	3807	Locus_1000_Transcript_1/4_Confidence_0.700_Length_3807	3807	Locus_1000_Transcript_1/4_Confidence_0.700_Length_3807	3807	Q91VC9	77.778	4.27e-111	GHITM_MOUSE	Growth hormone-inducible transmembrane protein	mmu:66092	GO:0070062 \\ GO:0016021 \\ GO:0005743 \\ GO:0005739 \\ GO:0006915 \\	apoptotic process (GO:0006915);	No_GOMF	extracellular exosome (GO:0070062);integral component of membrane (GO:0016021);mitochondrial inner membrane (GO:0005743);mitochondrion (GO:0005739);	Apoptosis;Complete proteome;Membrane;Mitochondrion;Mitochondrion inner membrane;Reference proteome;Transit peptide;Transmembrane;Transmembrane helix.;		-0.170984	9.07587	0.837455	1	15648	13887	14767.5	GHITM
Locus_10000_Transcript_3/4_Confidence_0.556_Length_567	567	Locus_10000_Transcript_3/4_Confidence_0.556_Length_567	567	Locus_10000_Transcript_3/4_Confidence_0.556_Length_567	567	Q3T0D6	57.037	1.42e-45	LEG4_BOVIN	Galectin-4	bta:614804	GO:0030246 \\	No_GOBP	carbohydrate binding (GO:0030246);	No_GOCC	Complete proteome;Lectin;Phosphoprotein;Reference proteome;Repeat.;		-0.234157	-0.825079	0.831972	1	14	13	13.5	LEG4
Locus_10001_Transcript_4/6_Confidence_0.643_Length_4319	4319	Locus_10001_Transcript_4/6_Confidence_0.643_Length_4319	4319	Locus_10001_Transcript_4/6_Confidence_0.643_Length_4319	4319	Q9Y223	92.105	0	GLCNE_HUMAN	Bifunctional UDP-N-acetylglucosamine 2-epimerase/N-acetylmannosamine kinase	hsa:10020	GO:0005737 \\ GO:0005829 \\ GO:0005524 \\ GO:0004553 \\ GO:0046872 \\ GO:0009384 \\ GO:0008761 \\ GO:0007155 \\ GO:0044267 \\ GO:0006488 \\ GO:0006045 \\ GO:0006054 \\ GO:0043687 \\ GO:0018279 \\ GO:0006047 \\	cell adhesion (GO:0007155);cellular protein metabolic process (GO:0044267);dolichol-linked oligosaccharide biosynthetic process (GO:0006488);N-acetylglucosamine biosynthetic process (GO:0006045);N-acetylneuraminate metabolic process (GO:0006054);post-translational protein modification (GO:0043687);protein N-linked glycosylation via asparagine (GO:0018279);UDP-N-acetylglucosamine metabolic process…	ATP binding (GO:0005524);hydrolase activity, hydrolyzing O-glycosyl compounds (GO:0004553);metal ion binding (GO:0046872);N-acylmannosamine kinase activity (GO:0009384);UDP-N-acetylglucosamine 2-epimerase activity (GO:0008761);	cytoplasm (GO:0005737);cytosol (GO:0005829);	3D-structure;Allosteric enzyme;Alternative splicing;ATP-binding;Complete proteome;Cytoplasm;Disease mutation;Hydrolase;Kinase;Metal-binding;Multifunctional enzyme;Nucleotide-binding;Phosphoprotein;Reference proteome;Transferase;Zinc.;		0.234002	4.4956	0.781027	1	749	502	625.5	GLCNE
Locus_10002_Transcript_10/12_Confidence_0.559_Length_4601	4601	Locus_10002_Transcript_10/12_Confidence_0.559_Length_4601	4601	Locus_10002_Transcript_10/12_Confidence_0.559_Length_4601	4601	Q9NVP4	47.872	3.01e-180	DZAN1_HUMAN	Double zinc ribbon and ankyrin repeat-containing protein 1	hsa:55184	GO:0008270 \\ GO:0098779 \\	mitophagy in response to mitochondrial depolarization (GO:0098779);	zinc ion binding (GO:0008270);	No_GOCC	Alternative splicing;ANK repeat;Complete proteome;Metal-binding;Phosphoprotein;Reference proteome;Repeat;Zinc;Zinc-finger.;		-0.241622	-0.734468	0.841685	1	15	14	14.5	DZAN1
Locus_10002_Transcript_12/12_Confidence_0.588_Length_4087	4087	Locus_10002_Transcript_12/12_Confidence_0.588_Length_4087	4087	Locus_10002_Transcript_12/12_Confidence_0.588_Length_4087	4087	Q9NVP4	50.066	0	DZAN1_HUMAN	Double zinc ribbon and ankyrin repeat-containing protein 1	hsa:55184	GO:0008270 \\ GO:0098779 \\	mitophagy in response to mitochondrial depolarization (GO:0098779);	zinc ion binding (GO:0008270);	No_GOCC	Alternative splicing;ANK repeat;Complete proteome;Metal-binding;Phosphoprotein;Reference proteome;Repeat;Zinc;Zinc-finger.;		-0.135573	-0.781454	0.918113	1	15	13	14	DZAN1
Locus_10002_Transcript_4/12_Confidence_0.529_Length_4006	4006	Locus_10002_Transcript_4/12_Confidence_0.529_Length_4006	4006	Locus_10002_Transcript_4/12_Confidence_0.529_Length_4006	4006	Q9NVP4	48.349	0	DZAN1_HUMAN	Double zinc ribbon and ankyrin repeat-containing protein 1	hsa:55184	GO:0008270 \\ GO:0098779 \\	mitophagy in response to mitochondrial depolarization (GO:0098779);	zinc ion binding (GO:0008270);	No_GOCC	Alternative splicing;ANK repeat;Complete proteome;Metal-binding;Phosphoprotein;Reference proteome;Repeat;Zinc;Zinc-finger.;		-0.0432963	-0.739179	1	1	16	13	14.5	DZAN1
Locus_100025_Transcript_1/1_Confidence_1.000_Length_447	447	No_sig_nr_hit	No_sig_nr_hit	No_sig_nr_hit	No_sig_nr_hit	No_Uniprotmatch	No_%_identity	No_evalue	No_ID	No_Description	No_KEGG	No_GO	No_GOCC	No_GOBP	No_GOMF	No_keywords		0.409206	-0.241698	0.716617	1	27	16	21.5	No
Locus_10003_Transcript_2/10_Confidence_0.345_Length_8245	8245	Locus_10003_Transcript_2/10_Confidence_0.345_Length_8245	8245	Locus_10003_Transcript_2/10_Confidence_0.345_Length_8245	8245	Q5HYC2	56.615	0	K2026_HUMAN	Uncharacterized protein KIAA2026	hsa:158358	No_GOcodes	No_GOBP	No_GOMF	No_GOCC	Alternative splicing;Complete proteome;Reference proteome.;		0.443356	0.200651	0.66837	1	38	22	30	K2026
Locus_10003_Transcript_4/10_Confidence_0.241_Length_2606	2606	Locus_10003_Transcript_4/10_Confidence_0.241_Length_2606	2606	Locus_10003_Transcript_4/10_Confidence_0.241_Length_2606	2606	Q5HYC2	65	0	K2026_HUMAN	Uncharacterized protein KIAA2026	hsa:158358	No_GOcodes	No_GOBP	No_GOMF	No_GOCC	Alternative splicing;Complete proteome;Reference proteome.;		0.370409	-0.436853	0.803399	1	23	14	18.5	K2026
Locus_10003_Transcript_6/10_Confidence_0.448_Length_8521	8521	Locus_10003_Transcript_6/10_Confidence_0.448_Length_8521	8521	Locus_10003_Transcript_6/10_Confidence_0.448_Length_8521	8521	Q5HYC2	51.453	0	K2026_HUMAN	Uncharacterized protein KIAA2026	hsa:158358	No_GOcodes	No_GOBP	No_GOMF	No_GOCC	Alternative splicing;Complete proteome;Reference proteome.;		0.165123	0.27579	0.878393	1	37	26	31.5	K2026
Locus_10004_Transcript_1/2_Confidence_0.750_Length_2645	2645	Locus_10004_Transcript_1/2_Confidence_0.750_Length_2645	2645	Locus_10004_Transcript_1/2_Confidence_0.750_Length_2645	2645	P26818	93.895	0	ARBK2_BOVIN	Beta-adrenergic receptor kinase 2	bta:282136	GO:0005524 \\ GO:0047696 \\ GO:0004703 \\ GO:0007165 \\	signal transduction (GO:0007165);	ATP binding (GO:0005524);beta-adrenergic receptor kinase activity (GO:0047696);G-protein coupled receptor kinase activity (GO:0004703);	No_GOCC	ATP-binding;Complete proteome;Kinase;Nucleotide-binding;Reference proteome;Serine/threonine-protein kinase;Transferase;Ubl conjugation.;		-0.695438	1.23449	0.441159	1	54	69	61.5	ARBK2
Locus_10005_Transcript_1/1_Confidence_1.000_Length_728	728	No_sig_nr_hit	No_sig_nr_hit	No_sig_nr_hit	No_sig_nr_hit	No_Uniprotmatch	No_%_identity	No_evalue	No_ID	No_Description	No_KEGG	No_GO	No_GOCC	No_GOBP	No_GOMF	No_keywords		0.14121	-0.466402	0.933943	1	21	15	18	No
Locus_10006_Transcript_1/2_Confidence_0.750_Length_1240	1240	Locus_10006_Transcript_1/2_Confidence_0.750_Length_1240	1240	Locus_10006_Transcript_1/2_Confidence_0.750_Length_1240	1240	Q2HJ48	96.887	0	KCTD1_BOVIN	BTB/POZ domain-containing protein KCTD1	bta:784587	GO:0005634 \\ GO:0003714 \\ GO:0045892 \\ GO:0051260 \\ GO:0006351 \\	negative regulation of transcription, DNA-templated (GO:0045892);protein homooligomerization (GO:0051260);transcription, DNA-templated (GO:0006351);	transcription corepressor activity (GO:0003714);	nucleus (GO:0005634);	Complete proteome;Nucleus;Phosphoprotein;Reference proteome;Repressor;Transcription;Transcription regulation;Ubl conjugation.;		0.331582	-0.884873	0.820975	1	16	10	13	KCTD1
Locus_100085_Transcript_2/2_Confidence_0.875_Length_234	234	No_sig_nr_hit	No_sig_nr_hit	No_sig_nr_hit	No_sig_nr_hit	No_Uniprotmatch	No_%_identity	No_evalue	No_ID	No_Description	No_KEGG	No_GO	No_GOCC	No_GOBP	No_GOMF	No_keywords		0.00332617	2.65402	1	1	192	151	171.5	No
Locus_10009_Transcript_1/10_Confidence_0.273_Length_946	946	Locus_10009_Transcript_1/10_Confidence_0.273_Length_946	946	Locus_10009_Transcript_1/10_Confidence_0.273_Length_946	946	Q95M17	63.366	7.43e-37	CHIA_BOVIN	Acidic mammalian chitinase	bta:282645	GO:0005737 \\ GO:0005576 \\ GO:0005615 \\ GO:0008061 \\ GO:0004568 \\ GO:0006915 \\ GO:0006032 \\ GO:0002376 \\ GO:0000272 \\ GO:0090197 \\ GO:0002532 \\	apoptotic process (GO:0006915);chitin catabolic process (GO:0006032);immune system process (GO:0002376);polysaccharide catabolic process (GO:0000272);positive regulation of chemokine secretion (GO:0090197);production of molecular mediator involved in inflammatory response (GO:0002532);	chitin binding (GO:0008061);chitinase activity (GO:0004568);	cytoplasm (GO:0005737);extracellular region (GO:0005576);extracellular space (GO:0005615);	Apoptosis;Carbohydrate metabolism;Chitin degradation;Chitin-binding;Complete proteome;Cytoplasm;Direct protein sequencing;Disulfide bond;Glycoprotein;Glycosidase;Hydrolase;Immunity;Inflammatory response;Polysaccharide degradation;Reference proteome;Secreted;Signal.;		0.425637	2.49296	0.629262	1	196	115	155.5	CHIA
Locus_10009_Transcript_6/10_Confidence_0.318_Length_1254	1254	Locus_10009_Transcript_6/10_Confidence_0.318_Length_1254	1254	Locus_10009_Transcript_6/10_Confidence_0.318_Length_1254	1254	Q9BZP6	69.415	0	CHIA_HUMAN	Acidic mammalian chitinase	hsa:27159	GO:0005737 \\ GO:0005576 \\ GO:0005615 \\ GO:0030246 \\ GO:0008061 \\ GO:0004568 \\ GO:0019900 \\ GO:0003796 \\ GO:0006915 \\ GO:0005975 \\ GO:0006037 \\ GO:0006032 \\ GO:0006030 \\ GO:0007586 \\ GO:0006955 \\ GO:0000272 \\ GO:0090197 \\ GO:0002532 \\ GO:0009620 \\ GO:0044281 \\	apoptotic process (GO:0006915);carbohydrate metabolic process (GO:0005975);cell wall chitin metabolic process (GO:0006037);chitin catabolic process (GO:0006032);chitin metabolic process (GO:0006030);digestion (GO:0007586);immune response (GO:0006955);polysaccharide catabolic process (GO:0000272);positive regulation of chemokine secretion (GO:0090197);production of molecular mediator involved in i…	carbohydrate binding (GO:0030246);chitin binding (GO:0008061);chitinase activity (GO:0004568);kinase binding (GO:0019900);lysozyme activity (GO:0003796);	cytoplasm (GO:0005737);extracellular region (GO:0005576);extracellular space (GO:0005615);	3D-structure;Alternative splicing;Apoptosis;Carbohydrate metabolism;Chitin degradation;Chitin-binding;Complete proteome;Cytoplasm;Disulfide bond;Glycosidase;Hydrolase;Immunity;Inflammatory response;Polymorphism;Polysaccharide degradation;Reference proteome;Secreted;Signal.;		0.0487533	4.16247	0.95779	1	559	426	492.5	CHIA
Locus_10009_Transcript_8/10_Confidence_0.318_Length_1315	1315	Locus_10009_Transcript_8/10_Confidence_0.318_Length_1315	1315	Locus_10009_Transcript_8/10_Confidence_0.318_Length_1315	1315	Q9BZP6	71.795	0	CHIA_HUMAN	Acidic mammalian chitinase	hsa:27159	GO:0005737 \\ GO:0005576 \\ GO:0005615 \\ GO:0030246 \\ GO:0008061 \\ GO:0004568 \\ GO:0019900 \\ GO:0003796 \\ GO:0006915 \\ GO:0005975 \\ GO:0006037 \\ GO:0006032 \\ GO:0006030 \\ GO:0007586 \\ GO:0006955 \\ GO:0000272 \\ GO:0090197 \\ GO:0002532 \\ GO:0009620 \\ GO:0044281 \\	apoptotic process (GO:0006915);carbohydrate metabolic process (GO:0005975);cell wall chitin metabolic process (GO:0006037);chitin catabolic process (GO:0006032);chitin metabolic process (GO:0006030);digestion (GO:0007586);immune response (GO:0006955);polysaccharide catabolic process (GO:0000272);positive regulation of chemokine secretion (GO:0090197);production of molecular mediator involved in i…	carbohydrate binding (GO:0030246);chitin binding (GO:0008061);chitinase activity (GO:0004568);kinase binding (GO:0019900);lysozyme activity (GO:0003796);	cytoplasm (GO:0005737);extracellular region (GO:0005576);extracellular space (GO:0005615);	3D-structure;Alternative splicing;Apoptosis;Carbohydrate metabolism;Chitin degradation;Chitin-binding;Complete proteome;Cytoplasm;Disulfide bond;Glycosidase;Hydrolase;Immunity;Inflammatory response;Polymorphism;Polysaccharide degradation;Reference proteome;Secreted;Signal.;		0.39909	4.51372	0.634436	1	798	477	637.5	CHIA
Locus_10009_Transcript_9/10_Confidence_0.273_Length_1467	1467	Locus_10009_Transcript_9/10_Confidence_0.273_Length_1467	1467	Locus_10009_Transcript_9/10_Confidence_0.273_Length_1467	1467	Q9BZP6	68.928	0	CHIA_HUMAN	Acidic mammalian chitinase	hsa:27159	GO:0005737 \\ GO:0005576 \\ GO:0005615 \\ GO:0030246 \\ GO:0008061 \\ GO:0004568 \\ GO:0019900 \\ GO:0003796 \\ GO:0006915 \\ GO:0005975 \\ GO:0006037 \\ GO:0006032 \\ GO:0006030 \\ GO:0007586 \\ GO:0006955 \\ GO:0000272 \\ GO:0090197 \\ GO:0002532 \\ GO:0009620 \\ GO:0044281 \\	apoptotic process (GO:0006915);carbohydrate metabolic process (GO:0005975);cell wall chitin metabolic process (GO:0006037);chitin catabolic process (GO:0006032);chitin metabolic process (GO:0006030);digestion (GO:0007586);immune response (GO:0006955);polysaccharide catabolic process (GO:0000272);positive regulation of chemokine secretion (GO:0090197);production of molecular mediator involved in i…	carbohydrate binding (GO:0030246);chitin binding (GO:0008061);chitinase activity (GO:0004568);kinase binding (GO:0019900);lysozyme activity (GO:0003796);	cytoplasm (GO:0005737);extracellular region (GO:0005576);extracellular space (GO:0005615);	3D-structure;Alternative splicing;Apoptosis;Carbohydrate metabolism;Chitin degradation;Chitin-binding;Complete proteome;Cytoplasm;Disulfide bond;Glycosidase;Hydrolase;Immunity;Inflammatory response;Polymorphism;Polysaccharide degradation;Reference proteome;Secreted;Signal.;		0.338439	5.01467	0.685888	1	1110	692	901	CHIA
Locus_1001_Transcript_1/3_Confidence_0.667_Length_2445	2445	Locus_1001_Transcript_1/3_Confidence_0.667_Length_2445	2445	Locus_1001_Transcript_1/3_Confidence_0.667_Length_2445	2445	P23588	80.788	5.58e-76	IF4B_HUMAN	Eukaryotic translation initiation factor 4B	No_KEGG	GO:0005829 \\ GO:0016281 \\ GO:0000166 \\ GO:0044822 \\ GO:0003723 \\ GO:0003743 \\ GO:0044267 \\ GO:0010467 \\ GO:0008286 \\ GO:0000288 \\ GO:0000289 \\ GO:0006446 \\ GO:0006412 \\ GO:0006413 \\	cellular protein metabolic process (GO:0044267);gene expression (GO:0010467);insulin receptor signaling pathway (GO:0008286);nuclear-transcribed mRNA catabolic process, deadenylation-dependent decay (GO:0000288);nuclear-transcribed mRNA poly(A) tail shortening (GO:0000289);regulation of translational initiation (GO:0006446);translation (GO:0006412);translational initiation (GO:0006413);	nucleotide binding (GO:0000166);poly(A) RNA binding (GO:0044822);RNA binding (GO:0003723);translation initiation factor activity (GO:0003743);	cytosol (GO:0005829);eukaryotic translation initiation factor 4F complex (GO:0016281);	3D-structure;Acetylation;Alternative splicing;Complete proteome;Direct protein sequencing;Initiation factor;Phosphoprotein;Polymorphism;Protein biosynthesis;Reference proteome;RNA-binding.;		-0.469633	7.43663	0.574031	1	4477	4887	4682	IF4B
Locus_1001_Transcript_2/3_Confidence_0.333_Length_1107	1107	No_sig_nr_hit	No_sig_nr_hit	No_sig_nr_hit	No_sig_nr_hit	No_Uniprotmatch	No_%_identity	No_evalue	No_ID	No_Description	No_KEGG	No_GO	No_GOCC	No_GOBP	No_GOMF	No_keywords		-0.0088059	3.24931	0.994705	1	290	230	260	No
Locus_10010_Transcript_1/5_Confidence_0.636_Length_1999	1999	Locus_10010_Transcript_1/5_Confidence_0.636_Length_1999	1999	Locus_10010_Transcript_1/5_Confidence_0.636_Length_1999	1999	Q9UGY1	65.285	2.04e-59	NOL12_HUMAN	Nucleolar protein 12	hsa:79159	GO:0005730 \\ GO:0044822 \\ GO:0019843 \\	No_GOBP	poly(A) RNA binding (GO:0044822);rRNA binding (GO:0019843);	nucleolus (GO:0005730);	Coiled coil;Complete proteome;Nucleus;Reference proteome;RNA-binding;rRNA-binding.;		0.400473	0.885845	0.685578	1	62	37	49.5	NOL12
Locus_10010_Transcript_2/5_Confidence_0.273_Length_1338	1338	Locus_10010_Transcript_2/5_Confidence_0.273_Length_1338	1338	Locus_10010_Transcript_2/5_Confidence_0.273_Length_1338	1338	Q5D1Z3	58.333	1.95e-14	NOL12_RAT	Nucleolar protein 12	rno:362955	GO:0005730 \\ GO:0005634 \\ GO:0003723 \\ GO:0019843 \\ GO:0003697 \\	No_GOBP	RNA binding (GO:0003723);rRNA binding (GO:0019843);single-stranded DNA binding (GO:0003697);	nucleolus (GO:0005730);nucleus (GO:0005634);	Coiled coil;Complete proteome;Nucleus;Reference proteome;RNA-binding;rRNA-binding.;		0.392589	0.723803	0.677676	1	55	33	44	NOL12
Locus_10010_Transcript_3/5_Confidence_0.636_Length_1868	1868	Locus_10010_Transcript_3/5_Confidence_0.636_Length_1868	1868	Locus_10010_Transcript_3/5_Confidence_0.636_Length_1868	1868	Q9UGY1	57.48	1.66e-40	NOL12_HUMAN	Nucleolar protein 12	hsa:79159	GO:0005730 \\ GO:0044822 \\ GO:0019843 \\	No_GOBP	poly(A) RNA binding (GO:0044822);rRNA binding (GO:0019843);	nucleolus (GO:0005730);	Coiled coil;Complete proteome;Nucleus;Reference proteome;RNA-binding;rRNA-binding.;		0.46807	1.06633	0.609868	1	72	41	56.5	NOL12
Locus_10010_Transcript_4/5_Confidence_0.182_Length_1480	1480	Locus_10010_Transcript_4/5_Confidence_0.182_Length_1480	1480	Locus_10010_Transcript_4/5_Confidence_0.182_Length_1480	1480	A0A099ZPQ6	90.909	2.95e-28	A0A099ZPQ6_TINGU	Nucleolar protein 12 {ECO:0000313|EMBL:KGL83792.1}	No_KEGG	GO:0016021 \\	No_GOBP	No_GOMF	integral component of membrane (GO:0016021);	Coiled coil {ECO:0000256|SAM:Coils};Complete proteome {ECO:0000313|Proteomes:UP000053641};Membrane {ECO:0000256|SAM:Phobius};Transmembrane {ECO:0000256|SAM:Phobius};Transmembrane helix {ECO:0000256|SAM:Phobius}.;		0.381177	0.391742	0.703241	1	43	26	34.5	A0A099ZPQ6
Locus_10010_Transcript_5/5_Confidence_0.636_Length_1917	1917	Locus_10010_Transcript_5/5_Confidence_0.636_Length_1917	1917	Locus_10010_Transcript_5/5_Confidence_0.636_Length_1917	1917	Q9UGY1	66.497	7.7e-65	NOL12_HUMAN	Nucleolar protein 12	hsa:79159	GO:0005730 \\ GO:0044822 \\ GO:0019843 \\	No_GOBP	poly(A) RNA binding (GO:0044822);rRNA binding (GO:0019843);	nucleolus (GO:0005730);	Coiled coil;Complete proteome;Nucleus;Reference proteome;RNA-binding;rRNA-binding.;		0.704811	1.2729	0.448179	1	89	43	66	NOL12
Locus_10011_Transcript_1/1_Confidence_1.000_Length_1997	1997	Locus_10011_Transcript_1/1_Confidence_1.000_Length_1997	1997	Locus_10011_Transcript_1/1_Confidence_1.000_Length_1997	1997	Q8R4V2	62.445	6.12e-84	DUS15_MOUSE	Dual specificity protein phosphatase 15 {ECO:0000250|UniProtKB:Q9H1R2}	mmu:252864	GO:0004725 \\ GO:0008138 \\ GO:0046330 \\ GO:0042127 \\ GO:0007179 \\	positive regulation of JNK cascade (GO:0046330);regulation of cell proliferation (GO:0042127);transforming growth factor beta receptor signaling pathway (GO:0007179);	protein tyrosine phosphatase activity (GO:0004725);protein tyrosine/serine/threonine phosphatase activity (GO:0008138);	No_GOCC	Alternative splicing;Complete proteome;Hydrolase;Protein phosphatase;Reference proteome.;		0.216685	3.60647	0.79913	1	401	272	336.5	DUS15
Locus_100125_Transcript_1/1_Confidence_1.000_Length_269	269	Locus_100125_Transcript_1/1_Confidence_1.000_Length_269	269	Locus_100125_Transcript_1/1_Confidence_1.000_Length_269	269	P01767	52.809	4.43e-26	HV306_HUMAN	Ig heavy chain V-III region BUT	No_KEGG	GO:0005576 \\ GO:0005886 \\ GO:0003823 \\ GO:0006956 \\ GO:0006958 \\ GO:0038095 \\ GO:0038096 \\ GO:0006955 \\ GO:0045087 \\ GO:0006898 \\ GO:0050776 \\	complement activation (GO:0006956);complement activation, classical pathway (GO:0006958);Fc-epsilon receptor signaling pathway (GO:0038095);Fc-gamma receptor signaling pathway involved in phagocytosis (GO:0038096);immune response (GO:0006955);innate immune response (GO:0045087);receptor-mediated endocytosis (GO:0006898);regulation of immune response (GO:0050776);	antigen binding (GO:0003823);	extracellular region (GO:0005576);plasma membrane (GO:0005886);	Complete proteome;Direct protein sequencing;Immunoglobulin domain;Immunoglobulin V region;Reference proteome.;		-2.44777	0.689577	0.0115247	0.956306	15	65	40	HV306
Locus_10015_Transcript_1/2_Confidence_0.750_Length_4927	4927	Locus_10015_Transcript_1/2_Confidence_0.750_Length_4927	4927	Locus_10015_Transcript_1/2_Confidence_0.750_Length_4927	4927	Q5T4D3	90.068	0	TMTC4_HUMAN	Transmembrane and TPR repeat-containing protein 4	hsa:84899	GO:0016021 \\	No_GOBP	No_GOMF	integral component of membrane (GO:0016021);	Alternative splicing;Complete proteome;Membrane;Polymorphism;Reference proteome;Repeat;TPR repeat;Transmembrane;Transmembrane helix.;		-0.868207	2.85733	0.312045	1	157	226	191.5	TMTC4
Locus_10017_Transcript_1/1_Confidence_1.000_Length_1157	1157	No_sig_nr_hit	No_sig_nr_hit	No_sig_nr_hit	No_sig_nr_hit	No_Uniprotmatch	No_%_identity	No_evalue	No_ID	No_Description	No_KEGG	No_GO	No_GOCC	No_GOBP	No_GOMF	No_keywords		1.00799	2.42406	0.246475	1	217	85	151	No
Locus_10018_Transcript_4/7_Confidence_0.611_Length_4315	4315	Locus_10018_Transcript_4/7_Confidence_0.611_Length_4315	4315	Locus_10018_Transcript_4/7_Confidence_0.611_Length_4315	4315	Q9CSP9	72.028	0	TTC14_MOUSE	Tetratricopeptide repeat protein 14	mmu:67120	GO:0003676 \\	No_GOBP	nucleic acid binding (GO:0003676);	No_GOCC	Alternative splicing;Complete proteome;Phosphoprotein;Reference proteome;Repeat;TPR repeat.;		1.51587	1.75126	0.0896493	1	149	41	95	TTC14
Locus_10018_Transcript_5/7_Confidence_0.556_Length_3304	3304	Locus_10018_Transcript_5/7_Confidence_0.556_Length_3304	3304	Locus_10018_Transcript_5/7_Confidence_0.556_Length_3304	3304	Q9CSP9	71.86	0	TTC14_MOUSE	Tetratricopeptide repeat protein 14	mmu:67120	GO:0003676 \\	No_GOBP	nucleic acid binding (GO:0003676);	No_GOCC	Alternative splicing;Complete proteome;Phosphoprotein;Reference proteome;Repeat;TPR repeat.;		1.28092	1.74475	0.151727	1	142	46	94	TTC14
Locus_10018_Transcript_6/7_Confidence_0.667_Length_4782	4782	Locus_10018_Transcript_6/7_Confidence_0.667_Length_4782	4782	Locus_10018_Transcript_6/7_Confidence_0.667_Length_4782	4782	Q9CSP9	72.028	0	TTC14_MOUSE	Tetratricopeptide repeat protein 14	mmu:67120	GO:0003676 \\	No_GOBP	nucleic acid binding (GO:0003676);	No_GOCC	Alternative splicing;Complete proteome;Phosphoprotein;Reference proteome;Repeat;TPR repeat.;		1.51468	2.13688	0.0874695	1	196	54	125	TTC14
Locus_10018_Transcript_7/7_Confidence_0.556_Length_2852	2852	Locus_10018_Transcript_7/7_Confidence_0.556_Length_2852	2852	Locus_10018_Transcript_7/7_Confidence_0.556_Length_2852	2852	Q9CSP9	71.86	0	TTC14_MOUSE	Tetratricopeptide repeat protein 14	mmu:67120	GO:0003676 \\	No_GOBP	nucleic acid binding (GO:0003676);	No_GOCC	Alternative splicing;Complete proteome;Phosphoprotein;Reference proteome;Repeat;TPR repeat.;		1.49905	1.39379	0.0982137	1	115	32	73.5	TTC14
Locus_10019_Transcript_1/1_Confidence_1.000_Length_488	488	No_sig_nr_hit	No_sig_nr_hit	No_sig_nr_hit	No_sig_nr_hit	No_Uniprotmatch	No_%_identity	No_evalue	No_ID	No_Description	No_KEGG	No_GO	No_GOCC	No_GOBP	No_GOMF	No_keywords		0.493883	0.0327907	0.624512	1	34	19	26.5	No
Locus_1002_Transcript_1/3_Confidence_0.750_Length_4143	4143	Locus_1002_Transcript_1/3_Confidence_0.750_Length_4143	4143	Locus_1002_Transcript_1/3_Confidence_0.750_Length_4143	4143	Q5NDL3	89.72	0	EOGT_CHICK	EGF domain-specific O-linked N-acetylglucosamine transferase	gga:426961	GO:0005788 \\ GO:0016262 \\ GO:0006493 \\	protein O-linked glycosylation (GO:0006493);	protein N-acetylglucosaminyltransferase activity (GO:0016262);	endoplasmic reticulum lumen (GO:0005788);	Complete proteome;Endoplasmic reticulum;Glycoprotein;Glycosyltransferase;Reference proteome;Signal;Transferase.;		-0.566314	3.04033	0.506879	1	203	237	220	EOGT
Locus_10020_Transcript_1/1_Confidence_1.000_Length_2515	2515	No_sig_nr_hit	No_sig_nr_hit	No_sig_nr_hit	No_sig_nr_hit	No_Uniprotmatch	No_%_identity	No_evalue	No_ID	No_Description	No_KEGG	No_GO	No_GOCC	No_GOBP	No_GOMF	No_keywords		0.0434313	-0.698172	1	1	17	13	15	No
Locus_10022_Transcript_1/2_Confidence_0.750_Length_3596	3596	Locus_10022_Transcript_1/2_Confidence_0.750_Length_3596	3596	Locus_10022_Transcript_1/2_Confidence_0.750_Length_3596	3596	P21556	62.275	2.05e-136	PTAFR_CAVPO	Platelet-activating factor receptor	No_KEGG	GO:0016021 \\ GO:0005654 \\ GO:0005886 \\ GO:0001530 \\ GO:0001875 \\ GO:0005543 \\ GO:0004992 \\ GO:0006935 \\ GO:0001816 \\ GO:0006954 \\ GO:0032959 \\ GO:0048015 \\	chemotaxis (GO:0006935);cytokine production (GO:0001816);inflammatory response (GO:0006954);inositol trisphosphate biosynthetic process (GO:0032959);phosphatidylinositol-mediated signaling (GO:0048015);	lipopolysaccharide binding (GO:0001530);lipopolysaccharide receptor activity (GO:0001875);phospholipid binding (GO:0005543);platelet activating factor receptor activity (GO:0004992);	integral component of membrane (GO:0016021);nucleoplasm (GO:0005654);plasma membrane (GO:0005886);	Cell membrane;Chemotaxis;Complete proteome;Disulfide bond;G-protein coupled receptor;Glycoprotein;Membrane;Receptor;Reference proteome;Transducer;Transmembrane;Transmembrane helix.;		-0.309772	4.13234	0.715276	1	481	470	475.5	PTAFR
Locus_10024_Transcript_1/2_Confidence_0.750_Length_1600	1600	Locus_10024_Transcript_1/2_Confidence_0.750_Length_1600	1600	Locus_10024_Transcript_1/2_Confidence_0.750_Length_1600	1600	Q9Y225	91.892	3.78e-81	RNF24_HUMAN	RING finger protein 24	hsa:11237	GO:0000139 \\ GO:0016021 \\ GO:0061630 \\ GO:0008270 \\ GO:0043161 \\ GO:0000209 \\ GO:0042787 \\	proteasome-mediated ubiquitin-dependent protein catabolic process (GO:0043161);protein polyubiquitination (GO:0000209);protein ubiquitination involved in ubiquitin-dependent protein catabolic process (GO:0042787);	ubiquitin protein ligase activity (GO:0061630);zinc ion binding (GO:0008270);	Golgi membrane (GO:0000139);integral component of membrane (GO:0016021);	3D-structure;Alternative splicing;Complete proteome;Golgi apparatus;Membrane;Metal-binding;Reference proteome;Transmembrane;Transmembrane helix;Zinc;Zinc-finger.;		-0.612976	3.07501	0.473446	1	204	246	225	RNF24
Locus_10025_Transcript_1/1_Confidence_1.000_Length_2531	2531	Locus_10025_Transcript_1/1_Confidence_1.000_Length_2531	2531	Locus_10025_Transcript_1/1_Confidence_1.000_Length_2531	2531	Q921Y2	64.324	3.77e-54	IMP3_MOUSE	U3 small nucleolar ribonucleoprotein protein IMP3	mmu:102462	GO:0034457 \\ GO:0005730 \\ GO:0005634 \\ GO:0032040 \\ GO:0044822 \\ GO:0030515 \\ GO:0030519 \\ GO:0006364 \\	rRNA processing (GO:0006364);	poly(A) RNA binding (GO:0044822);snoRNA binding (GO:0030515);snoRNP binding (GO:0030519);	Mpp10 complex (GO:0034457);nucleolus (GO:0005730);nucleus (GO:0005634);small-subunit processome (GO:0032040);	Complete proteome;Nucleus;Reference proteome;Ribonucleoprotein;Ribosome biogenesis;RNA-binding;rRNA processing;rRNA-binding.;		0.52563	4.72211	0.531487	1	957	524	740.5	IMP3
Locus_10026_Transcript_1/5_Confidence_0.583_Length_1536	1536	Locus_10026_Transcript_1/5_Confidence_0.583_Length_1536	1536	Locus_10026_Transcript_1/5_Confidence_0.583_Length_1536	1536	P82919	58.182	9.46e-10	RT18A_BOVIN	28S ribosomal protein S18a, mitochondrial	bta:614102	GO:0005743 \\ GO:0005763 \\ GO:0003735 \\ GO:0032543 \\	mitochondrial translation (GO:0032543);	structural constituent of ribosome (GO:0003735);	mitochondrial inner membrane (GO:0005743);mitochondrial small ribosomal subunit (GO:0005763);	3D-structure;Complete proteome;Direct protein sequencing;Mitochondrion;Reference proteome;Ribonucleoprotein;Ribosomal protein;Transit peptide.;		0.513961	3.22965	0.550941	1	337	186	261.5	RT18A
Locus_10026_Transcript_2/5_Confidence_0.583_Length_1712	1712	Locus_10026_Transcript_2/5_Confidence_0.583_Length_1712	1712	Locus_10026_Transcript_2/5_Confidence_0.583_Length_1712	1712	P82919	66.327	4.17e-78	RT18A_BOVIN	28S ribosomal protein S18a, mitochondrial	bta:614102	GO:0005743 \\ GO:0005763 \\ GO:0003735 \\ GO:0032543 \\	mitochondrial translation (GO:0032543);	structural constituent of ribosome (GO:0003735);	mitochondrial inner membrane (GO:0005743);mitochondrial small ribosomal subunit (GO:0005763);	3D-structure;Complete proteome;Direct protein sequencing;Mitochondrion;Reference proteome;Ribonucleoprotein;Ribosomal protein;Transit peptide.;		-0.193853	4.38762	0.820728	1	600	541	570.5	RT18A
Locus_10026_Transcript_3/5_Confidence_0.667_Length_1412	1412	Locus_10026_Transcript_3/5_Confidence_0.667_Length_1412	1412	Locus_10026_Transcript_3/5_Confidence_0.667_Length_1412	1412	P82919	62	4.37e-10	RT18A_BOVIN	28S ribosomal protein S18a, mitochondrial	bta:614102	GO:0005743 \\ GO:0005763 \\ GO:0003735 \\ GO:0032543 \\	mitochondrial translation (GO:0032543);	structural constituent of ribosome (GO:0003735);	mitochondrial inner membrane (GO:0005743);mitochondrial small ribosomal subunit (GO:0005763);	3D-structure;Complete proteome;Direct protein sequencing;Mitochondrion;Reference proteome;Ribonucleoprotein;Ribosomal protein;Transit peptide.;		0.106635	3.33886	0.905737	1	321	235	278	RT18A
Locus_10029_Transcript_1/1_Confidence_1.000_Length_2252	2252	No_sig_nr_hit	No_sig_nr_hit	No_sig_nr_hit	No_sig_nr_hit	No_Uniprotmatch	No_%_identity	No_evalue	No_ID	No_Description	No_KEGG	No_GO	No_GOCC	No_GOBP	No_GOMF	No_keywords		0.850564	6.71695	0.311203	1	4168	1822	2995	No
Locus_1003_Transcript_3/8_Confidence_0.250_Length_2523	2523	Locus_1003_Transcript_3/8_Confidence_0.250_Length_2523	2523	Locus_1003_Transcript_3/8_Confidence_0.250_Length_2523	2523	P51003	96.721	0	PAPOA_HUMAN	Poly(A) polymerase alpha	hsa:10914	GO:0005737 \\ GO:0005654 \\ GO:0005634 \\ GO:0005524 \\ GO:0000287 \\ GO:0030145 \\ GO:0004652 \\ GO:0003723 \\ GO:0010467 \\ GO:0031124 \\ GO:0006378 \\ GO:0000398 \\ GO:0031440 \\ GO:0043631 \\ GO:0008380 \\ GO:0006369 \\ GO:0006366 \\	gene expression (GO:0010467);mRNA 3'-end processing (GO:0031124);mRNA polyadenylation (GO:0006378);mRNA splicing, via spliceosome (GO:0000398);regulation of mRNA 3'-end processing (GO:0031440);RNA polyadenylation (GO:0043631);RNA splicing (GO:0008380);termination of RNA polymerase II transcription (GO:0006369);transcription from RNA polymerase II promoter (GO:0006366);	ATP binding (GO:0005524);magnesium ion binding (GO:0000287);manganese ion binding (GO:0030145);polynucleotide adenylyltransferase activity (GO:0004652);RNA binding (GO:0003723);	cytoplasm (GO:0005737);nucleoplasm (GO:0005654);nucleus (GO:0005634);	Acetylation;Alternative splicing;ATP-binding;Complete proteome;Cytoplasm;Isopeptide bond;Magnesium;Manganese;Metal-binding;mRNA processing;Nucleotide-binding;Nucleus;Phosphoprotein;Reference proteome;RNA-binding;Transferase;Ubl conjugation.;		0.137596	1.10437	0.907313	1	67	48	57.5	PAPOA
Locus_1003_Transcript_4/8_Confidence_0.500_Length_5243	5243	Locus_1003_Transcript_4/8_Confidence_0.500_Length_5243	5243	Locus_1003_Transcript_4/8_Confidence_0.500_Length_5243	5243	P51003	96.048	0	PAPOA_HUMAN	Poly(A) polymerase alpha	hsa:10914	GO:0005737 \\ GO:0005654 \\ GO:0005634 \\ GO:0005524 \\ GO:0000287 \\ GO:0030145 \\ GO:0004652 \\ GO:0003723 \\ GO:0010467 \\ GO:0031124 \\ GO:0006378 \\ GO:0000398 \\ GO:0031440 \\ GO:0043631 \\ GO:0008380 \\ GO:0006369 \\ GO:0006366 \\	gene expression (GO:0010467);mRNA 3'-end processing (GO:0031124);mRNA polyadenylation (GO:0006378);mRNA splicing, via spliceosome (GO:0000398);regulation of mRNA 3'-end processing (GO:0031440);RNA polyadenylation (GO:0043631);RNA splicing (GO:0008380);termination of RNA polymerase II transcription (GO:0006369);transcription from RNA polymerase II promoter (GO:0006366);	ATP binding (GO:0005524);magnesium ion binding (GO:0000287);manganese ion binding (GO:0030145);polynucleotide adenylyltransferase activity (GO:0004652);RNA binding (GO:0003723);	cytoplasm (GO:0005737);nucleoplasm (GO:0005654);nucleus (GO:0005634);	Acetylation;Alternative splicing;ATP-binding;Complete proteome;Cytoplasm;Isopeptide bond;Magnesium;Manganese;Metal-binding;mRNA processing;Nucleotide-binding;Nucleus;Phosphoprotein;Reference proteome;RNA-binding;Transferase;Ubl conjugation.;		0.572637	4.11159	0.499529	1	634	336	485	PAPOA
Locus_1003_Transcript_5/8_Confidence_0.375_Length_2620	2620	Locus_1003_Transcript_5/8_Confidence_0.375_Length_2620	2620	Locus_1003_Transcript_5/8_Confidence_0.375_Length_2620	2620	P51003	96.048	0	PAPOA_HUMAN	Poly(A) polymerase alpha	hsa:10914	GO:0005737 \\ GO:0005654 \\ GO:0005634 \\ GO:0005524 \\ GO:0000287 \\ GO:0030145 \\ GO:0004652 \\ GO:0003723 \\ GO:0010467 \\ GO:0031124 \\ GO:0006378 \\ GO:0000398 \\ GO:0031440 \\ GO:0043631 \\ GO:0008380 \\ GO:0006369 \\ GO:0006366 \\	gene expression (GO:0010467);mRNA 3'-end processing (GO:0031124);mRNA polyadenylation (GO:0006378);mRNA splicing, via spliceosome (GO:0000398);regulation of mRNA 3'-end processing (GO:0031440);RNA polyadenylation (GO:0043631);RNA splicing (GO:0008380);termination of RNA polymerase II transcription (GO:0006369);transcription from RNA polymerase II promoter (GO:0006366);	ATP binding (GO:0005524);magnesium ion binding (GO:0000287);manganese ion binding (GO:0030145);polynucleotide adenylyltransferase activity (GO:0004652);RNA binding (GO:0003723);	cytoplasm (GO:0005737);nucleoplasm (GO:0005654);nucleus (GO:0005634);	Acetylation;Alternative splicing;ATP-binding;Complete proteome;Cytoplasm;Isopeptide bond;Magnesium;Manganese;Metal-binding;mRNA processing;Nucleotide-binding;Nucleus;Phosphoprotein;Reference proteome;RNA-binding;Transferase;Ubl conjugation.;		-0.460738	1.68841	0.61309	1	82	89	85.5	PAPOA
Locus_1003_Transcript_6/8_Confidence_0.500_Length_5795	5795	Locus_1003_Transcript_6/8_Confidence_0.500_Length_5795	5795	Locus_1003_Transcript_6/8_Confidence_0.500_Length_5795	5795	Q61183	83.066	0	PAPOA_MOUSE	Poly(A) polymerase alpha	mmu:18789	GO:0005737 \\ GO:0005654 \\ GO:0005634 \\ GO:0005524 \\ GO:0000287 \\ GO:0030145 \\ GO:0004652 \\ GO:0003723 \\ GO:0006378 \\ GO:0031440 \\ GO:0043631 \\	mRNA polyadenylation (GO:0006378);regulation of mRNA 3'-end processing (GO:0031440);RNA polyadenylation (GO:0043631);	ATP binding (GO:0005524);magnesium ion binding (GO:0000287);manganese ion binding (GO:0030145);polynucleotide adenylyltransferase activity (GO:0004652);RNA binding (GO:0003723);	cytoplasm (GO:0005737);nucleoplasm (GO:0005654);nucleus (GO:0005634);	Acetylation;Alternative splicing;ATP-binding;Complete proteome;Isopeptide bond;Magnesium;Manganese;Metal-binding;mRNA processing;Nucleotide-binding;Nucleus;Phosphoprotein;Reference proteome;RNA-binding;Transferase;Ubl conjugation.;		0.428982	4.23037	0.611588	1	661	387	524	PAPOA
Locus_1003_Transcript_7/8_Confidence_0.312_Length_2509	2509	Locus_1003_Transcript_7/8_Confidence_0.312_Length_2509	2509	Locus_1003_Transcript_7/8_Confidence_0.312_Length_2509	2509	P51003	96.042	0	PAPOA_HUMAN	Poly(A) polymerase alpha	hsa:10914	GO:0005737 \\ GO:0005654 \\ GO:0005634 \\ GO:0005524 \\ GO:0000287 \\ GO:0030145 \\ GO:0004652 \\ GO:0003723 \\ GO:0010467 \\ GO:0031124 \\ GO:0006378 \\ GO:0000398 \\ GO:0031440 \\ GO:0043631 \\ GO:0008380 \\ GO:0006369 \\ GO:0006366 \\	gene expression (GO:0010467);mRNA 3'-end processing (GO:0031124);mRNA polyadenylation (GO:0006378);mRNA splicing, via spliceosome (GO:0000398);regulation of mRNA 3'-end processing (GO:0031440);RNA polyadenylation (GO:0043631);RNA splicing (GO:0008380);termination of RNA polymerase II transcription (GO:0006369);transcription from RNA polymerase II promoter (GO:0006366);	ATP binding (GO:0005524);magnesium ion binding (GO:0000287);manganese ion binding (GO:0030145);polynucleotide adenylyltransferase activity (GO:0004652);RNA binding (GO:0003723);	cytoplasm (GO:0005737);nucleoplasm (GO:0005654);nucleus (GO:0005634);	Acetylation;Alternative splicing;ATP-binding;Complete proteome;Cytoplasm;Isopeptide bond;Magnesium;Manganese;Metal-binding;mRNA processing;Nucleotide-binding;Nucleus;Phosphoprotein;Reference proteome;RNA-binding;Transferase;Ubl conjugation.;		0.453248	1.99446	0.610925	1	139	80	109.5	PAPOA
Locus_1003_Transcript_8/8_Confidence_0.500_Length_5032	5032	Locus_1003_Transcript_8/8_Confidence_0.500_Length_5032	5032	Locus_1003_Transcript_8/8_Confidence_0.500_Length_5032	5032	Q61183	88.649	0	PAPOA_MOUSE	Poly(A) polymerase alpha	mmu:18789	GO:0005737 \\ GO:0005654 \\ GO:0005634 \\ GO:0005524 \\ GO:0000287 \\ GO:0030145 \\ GO:0004652 \\ GO:0003723 \\ GO:0006378 \\ GO:0031440 \\ GO:0043631 \\	mRNA polyadenylation (GO:0006378);regulation of mRNA 3'-end processing (GO:0031440);RNA polyadenylation (GO:0043631);	ATP binding (GO:0005524);magnesium ion binding (GO:0000287);manganese ion binding (GO:0030145);polynucleotide adenylyltransferase activity (GO:0004652);RNA binding (GO:0003723);	cytoplasm (GO:0005737);nucleoplasm (GO:0005654);nucleus (GO:0005634);	Acetylation;Alternative splicing;ATP-binding;Complete proteome;Isopeptide bond;Magnesium;Manganese;Metal-binding;mRNA processing;Nucleotide-binding;Nucleus;Phosphoprotein;Reference proteome;RNA-binding;Transferase;Ubl conjugation.;		0.362699	4.15513	0.669241	1	615	377	496	PAPOA
Locus_10030_Transcript_1/3_Confidence_0.600_Length_1580	1580	Locus_10030_Transcript_1/3_Confidence_0.600_Length_1580	1580	Locus_10030_Transcript_1/3_Confidence_0.600_Length_1580	1580	Q15006	96.831	0	EMC2_HUMAN	ER membrane protein complex subunit 2	hsa:9694	GO:0005737 \\ GO:0005783 \\ GO:0072546 \\ GO:0005739 \\ GO:0005634 \\	No_GOBP	No_GOMF	cytoplasm (GO:0005737);endoplasmic reticulum (GO:0005783);ER membrane protein complex (GO:0072546);mitochondrion (GO:0005739);nucleus (GO:0005634);	Acetylation;Complete proteome;Cytoplasm;Nucleus;Reference proteome;Repeat;TPR repeat.;		0.591283	2.82868	0.489736	1	260	136	198	EMC2
Locus_10030_Transcript_2/3_Confidence_0.400_Length_1124	1124	Locus_10030_Transcript_2/3_Confidence_0.400_Length_1124	1124	Locus_10030_Transcript_2/3_Confidence_0.400_Length_1124	1124	Q15006	100	3.5e-08	EMC2_HUMAN	ER membrane protein complex subunit 2	hsa:9694	GO:0005737 \\ GO:0005783 \\ GO:0072546 \\ GO:0005739 \\ GO:0005634 \\	No_GOBP	No_GOMF	cytoplasm (GO:0005737);endoplasmic reticulum (GO:0005783);ER membrane protein complex (GO:0072546);mitochondrion (GO:0005739);nucleus (GO:0005634);	Acetylation;Complete proteome;Cytoplasm;Nucleus;Reference proteome;Repeat;TPR repeat.;		0.852079	1.29839	0.336876	1	94	41	67.5	EMC2
Locus_10030_Transcript_3/3_Confidence_0.600_Length_1551	1551	Locus_10030_Transcript_3/3_Confidence_0.600_Length_1551	1551	Locus_10030_Transcript_3/3_Confidence_0.600_Length_1551	1551	Q15006	96.633	0	EMC2_HUMAN	ER membrane protein complex subunit 2	hsa:9694	GO:0005737 \\ GO:0005783 \\ GO:0072546 \\ GO:0005739 \\ GO:0005634 \\	No_GOBP	No_GOMF	cytoplasm (GO:0005737);endoplasmic reticulum (GO:0005783);ER membrane protein complex (GO:0072546);mitochondrion (GO:0005739);nucleus (GO:0005634);	Acetylation;Complete proteome;Cytoplasm;Nucleus;Reference proteome;Repeat;TPR repeat.;		0.512588	2.79245	0.550564	1	248	137	192.5	EMC2
Locus_10033_Transcript_1/1_Confidence_1.000_Length_3529	3529	Locus_10033_Transcript_1/1_Confidence_1.000_Length_3529	3529	Locus_10033_Transcript_1/1_Confidence_1.000_Length_3529	3529	Q8NI36	71.413	0	WDR36_HUMAN	WD repeat-containing protein 36	hsa:134430	GO:0005730 \\ GO:0032040 \\ GO:0044822 \\ GO:0030516 \\ GO:0050896 \\ GO:0001895 \\ GO:0006364 \\ GO:0007601 \\	regulation of axon extension (GO:0030516);response to stimulus (GO:0050896);retina homeostasis (GO:0001895);rRNA processing (GO:0006364);visual perception (GO:0007601);	poly(A) RNA binding (GO:0044822);	nucleolus (GO:0005730);small-subunit processome (GO:0032040);	Complete proteome;Disease mutation;Glaucoma;Nucleus;Polymorphism;Reference proteome;Repeat;Ribosome biogenesis;rRNA processing;Sensory transduction;Vision;WD repeat.;		0.188653	2.72122	0.833578	1	214	148	181	WDR36
Locus_10036_Transcript_1/3_Confidence_0.714_Length_6232	6232	Locus_10036_Transcript_1/3_Confidence_0.714_Length_6232	6232	Locus_10036_Transcript_1/3_Confidence_0.714_Length_6232	6232	Q02440	98.493	0	MYO5A_CHICK	Unconventional myosin-Va	gga:396237	GO:0031941 \\ GO:0000139 \\ GO:0032593 \\ GO:0016459 \\ GO:0005524 \\ GO:0005516 \\ GO:0000146 \\ GO:0060001 \\ GO:0032869 \\ GO:0072659 \\ GO:0016192 \\	cellular response to insulin stimulus (GO:0032869);protein localization to plasma membrane (GO:0072659);vesicle-mediated transport (GO:0016192);	ATP binding (GO:0005524);calmodulin binding (GO:0005516);microfilament motor activity (GO:0000146);minus-end directed microfilament motor activity (GO:0060001);	filamentous actin (GO:0031941);Golgi membrane (GO:0000139);insulin-responsive compartment (GO:0032593);myosin complex (GO:0016459);	3D-structure;Actin-binding;ATP-binding;Calmodulin-binding;Coiled coil;Complete proteome;Direct protein sequencing;Golgi apparatus;Membrane;Motor protein;Myosin;Nucleotide-binding;Phosphoprotein;Reference proteome;Repeat.;		1.04192	0.501267	0.28079	1	55	21	38	MYO5A
Locus_10038_Transcript_1/5_Confidence_0.636_Length_1751	1751	Locus_10038_Transcript_1/5_Confidence_0.636_Length_1751	1751	Locus_10038_Transcript_1/5_Confidence_0.636_Length_1751	1751	Q8VBV3	86.127	3.42e-139	EXOS2_MOUSE	Exosome complex component RRP4	mmu:227715	GO:0005737 \\ GO:0000177 \\ GO:0000178 \\ GO:0000176 \\ GO:0005730 \\ GO:0005634 \\ GO:0003723 \\ GO:0071034 \\ GO:0043928 \\ GO:0000467 \\ GO:0071035 \\ GO:0071038 \\ GO:0071049 \\ GO:0034427 \\ GO:0071051 \\ GO:0030307 \\ GO:0034475 \\	CUT catabolic process (GO:0071034);exonucleolytic nuclear-transcribed mRNA catabolic process involved in deadenylation-dependent decay (GO:0043928);exonucleolytic trimming to generate mature 3'-end of 5.8S rRNA from tricistronic rRNA transcript (SSU-rRNA, 5.8S rRNA, LSU-rRNA) (GO:0000467);nuclear polyadenylation-dependent rRNA catabolic process (GO:0071035);nuclear polyadenylation-dependent tRNA …	RNA binding (GO:0003723);	cytoplasm (GO:0005737);cytoplasmic exosome (RNase complex) (GO:0000177);exosome (RNase complex) (GO:0000178);nuclear exosome (RNase complex) (GO:0000176);nucleolus (GO:0005730);nucleus (GO:0005634);	Complete proteome;Cytoplasm;Exosome;Nucleus;Phosphoprotein;Reference proteome;RNA-binding;rRNA processing.;		0.252281	1.01228	0.780458	1	65	43	54	EXOS2
Locus_10038_Transcript_3/5_Confidence_0.636_Length_1580	1580	Locus_10038_Transcript_3/5_Confidence_0.636_Length_1580	1580	Locus_10038_Transcript_3/5_Confidence_0.636_Length_1580	1580	Q13868	86.7	9.27e-126	EXOS2_HUMAN	Exosome complex component RRP4	hsa:23404	GO:0005737 \\ GO:0000177 \\ GO:0005829 \\ GO:0000178 \\ GO:0000176 \\ GO:0005730 \\ GO:0005634 \\ GO:0000175 \\ GO:0008312 \\ GO:0071034 \\ GO:0043928 \\ GO:0000467 \\ GO:0010467 \\ GO:0071035 \\ GO:0071038 \\ GO:0071049 \\ GO:0000288 \\ GO:0034427 \\ GO:0071051 \\ GO:0030307 \\ GO:0043488 \\ GO:0006364 \\ GO:0034475 \\	CUT catabolic process (GO:0071034);exonucleolytic nuclear-transcribed mRNA catabolic process involved in deadenylation-dependent decay (GO:0043928);exonucleolytic trimming to generate mature 3'-end of 5.8S rRNA from tricistronic rRNA transcript (SSU-rRNA, 5.8S rRNA, LSU-rRNA) (GO:0000467);gene expression (GO:0010467);nuclear polyadenylation-dependent rRNA catabolic process (GO:0071035);nuclear po…	3'-5'-exoribonuclease activity (GO:0000175);7S RNA binding (GO:0008312);	cytoplasm (GO:0005737);cytoplasmic exosome (RNase complex) (GO:0000177);cytosol (GO:0005829);exosome (RNase complex) (GO:0000178);nuclear exosome (RNase complex) (GO:0000176);nucleolus (GO:0005730);nucleus (GO:0005634);	3D-structure;Alternative splicing;Complete proteome;Cytoplasm;Exosome;Nucleus;Phosphoprotein;Reference proteome;RNA-binding;rRNA processing.;		0.813687	0.842251	0.378878	1	67	30	48.5	EXOS2
Locus_10038_Transcript_4/5_Confidence_0.636_Length_1787	1787	Locus_10038_Transcript_4/5_Confidence_0.636_Length_1787	1787	Locus_10038_Transcript_4/5_Confidence_0.636_Length_1787	1787	Q8VBV3	86.093	2.35e-87	EXOS2_MOUSE	Exosome complex component RRP4	mmu:227715	GO:0005737 \\ GO:0000177 \\ GO:0000178 \\ GO:0000176 \\ GO:0005730 \\ GO:0005634 \\ GO:0003723 \\ GO:0071034 \\ GO:0043928 \\ GO:0000467 \\ GO:0071035 \\ GO:0071038 \\ GO:0071049 \\ GO:0034427 \\ GO:0071051 \\ GO:0030307 \\ GO:0034475 \\	CUT catabolic process (GO:0071034);exonucleolytic nuclear-transcribed mRNA catabolic process involved in deadenylation-dependent decay (GO:0043928);exonucleolytic trimming to generate mature 3'-end of 5.8S rRNA from tricistronic rRNA transcript (SSU-rRNA, 5.8S rRNA, LSU-rRNA) (GO:0000467);nuclear polyadenylation-dependent rRNA catabolic process (GO:0071035);nuclear polyadenylation-dependent tRNA …	RNA binding (GO:0003723);	cytoplasm (GO:0005737);cytoplasmic exosome (RNase complex) (GO:0000177);exosome (RNase complex) (GO:0000178);nuclear exosome (RNase complex) (GO:0000176);nucleolus (GO:0005730);nucleus (GO:0005634);	Complete proteome;Cytoplasm;Exosome;Nucleus;Phosphoprotein;Reference proteome;RNA-binding;rRNA processing.;		0.359377	0.786251	0.690502	1	57	35	46	EXOS2
Locus_10038_Transcript_5/5_Confidence_0.636_Length_1641	1641	Locus_10038_Transcript_5/5_Confidence_0.636_Length_1641	1641	Locus_10038_Transcript_5/5_Confidence_0.636_Length_1641	1641	Q8VBV3	83.904	1.41e-179	EXOS2_MOUSE	Exosome complex component RRP4	mmu:227715	GO:0005737 \\ GO:0000177 \\ GO:0000178 \\ GO:0000176 \\ GO:0005730 \\ GO:0005634 \\ GO:0003723 \\ GO:0071034 \\ GO:0043928 \\ GO:0000467 \\ GO:0071035 \\ GO:0071038 \\ GO:0071049 \\ GO:0034427 \\ GO:0071051 \\ GO:0030307 \\ GO:0034475 \\	CUT catabolic process (GO:0071034);exonucleolytic nuclear-transcribed mRNA catabolic process involved in deadenylation-dependent decay (GO:0043928);exonucleolytic trimming to generate mature 3'-end of 5.8S rRNA from tricistronic rRNA transcript (SSU-rRNA, 5.8S rRNA, LSU-rRNA) (GO:0000467);nuclear polyadenylation-dependent rRNA catabolic process (GO:0071035);nuclear polyadenylation-dependent tRNA …	RNA binding (GO:0003723);	cytoplasm (GO:0005737);cytoplasmic exosome (RNase complex) (GO:0000177);exosome (RNase complex) (GO:0000178);nuclear exosome (RNase complex) (GO:0000176);nucleolus (GO:0005730);nucleus (GO:0005634);	Complete proteome;Cytoplasm;Exosome;Nucleus;Phosphoprotein;Reference proteome;RNA-binding;rRNA processing.;		0.229386	0.933948	0.818914	1	61	41	51	EXOS2
Locus_1004_Transcript_7/12_Confidence_0.559_Length_9759	9759	Locus_1004_Transcript_7/12_Confidence_0.559_Length_9759	9759	Locus_1004_Transcript_7/12_Confidence_0.559_Length_9759	9759	Q8BI84	48.953	0	MIA3_MOUSE	Melanoma inhibitory activity protein 3	mmu:338366	GO:0005789 \\ GO:0016021 \\ GO:0043231 \\ GO:0016020 \\ GO:0002063 \\ GO:0030199 \\ GO:0006887 \\ GO:0007162 \\ GO:0030336 \\ GO:0030501 \\ GO:0002687 \\ GO:0015031 \\ GO:0042060 \\	chondrocyte development (GO:0002063);collagen fibril organization (GO:0030199);exocytosis (GO:0006887);negative regulation of cell adhesion (GO:0007162);negative regulation of cell migration (GO:0030336);positive regulation of bone mineralization (GO:0030501);positive regulation of leukocyte migration (GO:0002687);protein transport (GO:0015031);wound healing (GO:0042060);	No_GOMF	endoplasmic reticulum membrane (GO:0005789);integral component of membrane (GO:0016021);intracellular membrane-bounded organelle (GO:0043231);membrane (GO:0016020);	Alternative splicing;Coiled coil;Complete proteome;Endoplasmic reticulum;ER-Golgi transport;Exocytosis;Glycoprotein;Membrane;Phosphoprotein;Protein transport;Reference proteome;SH3 domain;Signal;Transmembrane;Transmembrane helix;Transport.;		-0.095182	4.85571	0.90958	1	861	725	793	MIA3
Locus_1004_Transcript_8/12_Confidence_0.508_Length_11070	11070	Locus_1004_Transcript_8/12_Confidence_0.508_Length_11070	11070	Locus_1004_Transcript_8/12_Confidence_0.508_Length_11070	11070	Q8BI84	48.953	0	MIA3_MOUSE	Melanoma inhibitory activity protein 3	mmu:338366	GO:0005789 \\ GO:0016021 \\ GO:0043231 \\ GO:0016020 \\ GO:0002063 \\ GO:0030199 \\ GO:0006887 \\ GO:0007162 \\ GO:0030336 \\ GO:0030501 \\ GO:0002687 \\ GO:0015031 \\ GO:0042060 \\	chondrocyte development (GO:0002063);collagen fibril organization (GO:0030199);exocytosis (GO:0006887);negative regulation of cell adhesion (GO:0007162);negative regulation of cell migration (GO:0030336);positive regulation of bone mineralization (GO:0030501);positive regulation of leukocyte migration (GO:0002687);protein transport (GO:0015031);wound healing (GO:0042060);	No_GOMF	endoplasmic reticulum membrane (GO:0005789);integral component of membrane (GO:0016021);intracellular membrane-bounded organelle (GO:0043231);membrane (GO:0016020);	Alternative splicing;Coiled coil;Complete proteome;Endoplasmic reticulum;ER-Golgi transport;Exocytosis;Glycoprotein;Membrane;Phosphoprotein;Protein transport;Reference proteome;SH3 domain;Signal;Transmembrane;Transmembrane helix;Transport.;		-0.18796	4.95505	0.823998	1	892	801	846.5	MIA3
Locus_1004_Transcript_9/12_Confidence_0.542_Length_11485	11485	Locus_1004_Transcript_9/12_Confidence_0.542_Length_11485	11485	Locus_1004_Transcript_9/12_Confidence_0.542_Length_11485	11485	Q8BI84	48.444	5.71e-176	MIA3_MOUSE	Melanoma inhibitory activity protein 3	mmu:338366	GO:0005789 \\ GO:0016021 \\ GO:0043231 \\ GO:0016020 \\ GO:0002063 \\ GO:0030199 \\ GO:0006887 \\ GO:0007162 \\ GO:0030336 \\ GO:0030501 \\ GO:0002687 \\ GO:0015031 \\ GO:0042060 \\	chondrocyte development (GO:0002063);collagen fibril organization (GO:0030199);exocytosis (GO:0006887);negative regulation of cell adhesion (GO:0007162);negative regulation of cell migration (GO:0030336);positive regulation of bone mineralization (GO:0030501);positive regulation of leukocyte migration (GO:0002687);protein transport (GO:0015031);wound healing (GO:0042060);	No_GOMF	endoplasmic reticulum membrane (GO:0005789);integral component of membrane (GO:0016021);intracellular membrane-bounded organelle (GO:0043231);membrane (GO:0016020);	Alternative splicing;Coiled coil;Complete proteome;Endoplasmic reticulum;ER-Golgi transport;Exocytosis;Glycoprotein;Membrane;Phosphoprotein;Protein transport;Reference proteome;SH3 domain;Signal;Transmembrane;Transmembrane helix;Transport.;		-0.246257	4.88427	0.770596	1	831	777	804	MIA3
Locus_10040_Transcript_1/1_Confidence_1.000_Length_827	827	Locus_10040_Transcript_1/1_Confidence_1.000_Length_827	827	Locus_10040_Transcript_1/1_Confidence_1.000_Length_827	827	K7EX51	53.153	7.39e-51	K7EX51_PELSI	Uncharacterized protein {ECO:0000313|Ensembl:ENSPSIP00000000361}	No_KEGG	GO:0003723 \\ GO:0003964 \\	No_GOBP	RNA binding (GO:0003723);RNA-directed DNA polymerase activity (GO:0003964);	No_GOCC	Complete proteome {ECO:0000313|Proteomes:UP000007267};Reference proteome {ECO:0000313|Proteomes:UP000007267}.;		0.904841	-0.224666	0.38734	1	31	13	22	K7EX51
Locus_10043_Transcript_1/2_Confidence_0.750_Length_2073	2073	Locus_10043_Transcript_1/2_Confidence_0.750_Length_2073	2073	Locus_10043_Transcript_1/2_Confidence_0.750_Length_2073	2073	Q6V0I7	88.745	0	FAT4_HUMAN	Protocadherin Fat 4	hsa:79633	GO:0045177 \\ GO:0070062 \\ GO:0016021 \\ GO:0005622 \\ GO:0005886 \\ GO:0005509 \\ GO:0001658 \\ GO:0021987 \\ GO:0048565 \\ GO:0003007 \\ GO:0007157 \\ GO:0035329 \\ GO:0007156 \\ GO:0060122 \\ GO:0022008 \\ GO:0043931 \\ GO:0007009 \\ GO:0072307 \\	branching involved in ureteric bud morphogenesis (GO:0001658);cerebral cortex development (GO:0021987);digestive tract development (GO:0048565);heart morphogenesis (GO:0003007);heterophilic cell-cell adhesion via plasma membrane cell adhesion molecules (GO:0007157);hippo signaling (GO:0035329);homophilic cell adhesion via plasma membrane adhesion molecules (GO:0007156);inner ear receptor stereoci…	calcium ion binding (GO:0005509);	apical part of cell (GO:0045177);extracellular exosome (GO:0070062);integral component of membrane (GO:0016021);intracellular (GO:0005622);plasma membrane (GO:0005886);	Alternative splicing;Calcium;Cell adhesion;Complete proteome;Deafness;Disease mutation;Disulfide bond;EGF-like domain;Glycoprotein;Membrane;Mental retardation;Phosphoprotein;Polymorphism;Reference proteome;Repeat;Signal;Transmembrane;Transmembrane helix.;		-0.41112	-0.280891	0.716617	1	20	21	20.5	FAT4
Locus_10045_Transcript_2/9_Confidence_0.542_Length_2435	2435	Locus_10045_Transcript_2/9_Confidence_0.542_Length_2435	2435	Locus_10045_Transcript_2/9_Confidence_0.542_Length_2435	2435	P04157	46.733	2.86e-105	PTPRC_RAT	Receptor-type tyrosine-protein phosphatase C	rno:24699	GO:0009986 \\ GO:0009898 \\ GO:0005925 \\ GO:0016021 \\ GO:0005887 \\ GO:0005622 \\ GO:0045121 \\ GO:0008201 \\ GO:0019901 \\ GO:0019887 \\ GO:0004725 \\ GO:0005001 \\ GO:0000187 \\ GO:0030183 \\ GO:0042100 \\ GO:0050853 \\ GO:0051607 \\ GO:0016311 \\ GO:0034113 \\ GO:0001960 \\ GO:0050732 \\ GO:0031953 \\ GO:0006469 \\ GO:0001915 \\ GO:0045060 \\ GO:0035335 \\ GO:0046641 \\ GO:0050857 \\ GO:2001…	activation of MAPK activity (GO:0000187);B cell differentiation (GO:0030183);B cell proliferation (GO:0042100);B cell receptor signaling pathway (GO:0050853);defense response to virus (GO:0051607);dephosphorylation (GO:0016311);heterotypic cell-cell adhesion (GO:0034113);negative regulation of cytokine-mediated signaling pathway (GO:0001960);negative regulation of peptidyl-tyrosine phosphorylatio…	heparin binding (GO:0008201);protein kinase binding (GO:0019901);protein kinase regulator activity (GO:0019887);protein tyrosine phosphatase activity (GO:0004725);transmembrane receptor protein tyrosine phosphatase activity (GO:0005001);	cell surface (GO:0009986);cytoplasmic side of plasma membrane (GO:0009898);focal adhesion (GO:0005925);integral component of membrane (GO:0016021);integral component of plasma membrane (GO:0005887);intracellular (GO:0005622);membrane raft (GO:0045121);	Alternative splicing;Complete proteome;Glycoprotein;Hydrolase;Membrane;Phosphoprotein;Protein phosphatase;Reference proteome;Repeat;Signal;Transmembrane;Transmembrane helix.;		-0.985259	0.226029	0.307655	1	23	36	29.5	PTPRC
Locus_10045_Transcript_4/9_Confidence_0.625_Length_4100	4100	Locus_10045_Transcript_4/9_Confidence_0.625_Length_4100	4100	Locus_10045_Transcript_4/9_Confidence_0.625_Length_4100	4100	P08575	60.584	0	PTPRC_HUMAN	Receptor-type tyrosine-protein phosphatase C	No_KEGG	GO:0009986 \\ GO:0009897 \\ GO:0070062 \\ GO:0005925 \\ GO:0005887 \\ GO:0005622 \\ GO:0016020 \\ GO:0045121 \\ GO:0005886 \\ GO:0019901 \\ GO:0004725 \\ GO:0005001 \\ GO:0007411 \\ GO:0042100 \\ GO:0050853 \\ GO:0048539 \\ GO:0044770 \\ GO:0007166 \\ GO:0051607 \\ GO:0016311 \\ GO:0002244 \\ GO:0002378 \\ GO:0006933 \\ GO:0001960 \\ GO:0006469 \\ GO:0001915 \\ GO:0035335 \\ GO:0050857 \\ GO:0030…	axon guidance (GO:0007411);B cell proliferation (GO:0042100);B cell receptor signaling pathway (GO:0050853);bone marrow development (GO:0048539);cell cycle phase transition (GO:0044770);cell surface receptor signaling pathway (GO:0007166);defense response to virus (GO:0051607);dephosphorylation (GO:0016311);hematopoietic progenitor cell differentiation (GO:0002244);immunoglobulin biosynthetic pro…	protein kinase binding (GO:0019901);protein tyrosine phosphatase activity (GO:0004725);transmembrane receptor protein tyrosine phosphatase activity (GO:0005001);	cell surface (GO:0009986);external side of plasma membrane (GO:0009897);extracellular exosome (GO:0070062);focal adhesion (GO:0005925);integral component of plasma membrane (GO:0005887);intracellular (GO:0005622);membrane (GO:0016020);membrane raft (GO:0045121);plasma membrane (GO:0005886);	3D-structure;Alternative splicing;Complete proteome;Disease mutation;Glycoprotein;Hydrolase;Membrane;Phosphoprotein;Polymorphism;Protein phosphatase;Reference proteome;Repeat;SCID;Signal;Transmembrane;Transmembrane helix.;		-0.0272872	3.30701	0.979641	1	300	241	270.5	PTPRC
Locus_10045_Transcript_5/9_Confidence_0.583_Length_4167	4167	Locus_10045_Transcript_5/9_Confidence_0.583_Length_4167	4167	Locus_10045_Transcript_5/9_Confidence_0.583_Length_4167	4167	P08575	61.105	0	PTPRC_HUMAN	Receptor-type tyrosine-protein phosphatase C	No_KEGG	GO:0009986 \\ GO:0009897 \\ GO:0070062 \\ GO:0005925 \\ GO:0005887 \\ GO:0005622 \\ GO:0016020 \\ GO:0045121 \\ GO:0005886 \\ GO:0019901 \\ GO:0004725 \\ GO:0005001 \\ GO:0007411 \\ GO:0042100 \\ GO:0050853 \\ GO:0048539 \\ GO:0044770 \\ GO:0007166 \\ GO:0051607 \\ GO:0016311 \\ GO:0002244 \\ GO:0002378 \\ GO:0006933 \\ GO:0001960 \\ GO:0006469 \\ GO:0001915 \\ GO:0035335 \\ GO:0050857 \\ GO:0030…	axon guidance (GO:0007411);B cell proliferation (GO:0042100);B cell receptor signaling pathway (GO:0050853);bone marrow development (GO:0048539);cell cycle phase transition (GO:0044770);cell surface receptor signaling pathway (GO:0007166);defense response to virus (GO:0051607);dephosphorylation (GO:0016311);hematopoietic progenitor cell differentiation (GO:0002244);immunoglobulin biosynthetic pro…	protein kinase binding (GO:0019901);protein tyrosine phosphatase activity (GO:0004725);transmembrane receptor protein tyrosine phosphatase activity (GO:0005001);	cell surface (GO:0009986);external side of plasma membrane (GO:0009897);extracellular exosome (GO:0070062);focal adhesion (GO:0005925);integral component of plasma membrane (GO:0005887);intracellular (GO:0005622);membrane (GO:0016020);membrane raft (GO:0045121);plasma membrane (GO:0005886);	3D-structure;Alternative splicing;Complete proteome;Disease mutation;Glycoprotein;Hydrolase;Membrane;Phosphoprotein;Polymorphism;Protein phosphatase;Reference proteome;Repeat;SCID;Signal;Transmembrane;Transmembrane helix.;		-0.240276	2.51792	0.783744	1	160	149	154.5	PTPRC
Locus_10045_Transcript_6/9_Confidence_0.500_Length_4045	4045	Locus_10045_Transcript_6/9_Confidence_0.500_Length_4045	4045	Locus_10045_Transcript_6/9_Confidence_0.500_Length_4045	4045	P08575	65.041	0	PTPRC_HUMAN	Receptor-type tyrosine-protein phosphatase C	No_KEGG	GO:0009986 \\ GO:0009897 \\ GO:0070062 \\ GO:0005925 \\ GO:0005887 \\ GO:0005622 \\ GO:0016020 \\ GO:0045121 \\ GO:0005886 \\ GO:0019901 \\ GO:0004725 \\ GO:0005001 \\ GO:0007411 \\ GO:0042100 \\ GO:0050853 \\ GO:0048539 \\ GO:0044770 \\ GO:0007166 \\ GO:0051607 \\ GO:0016311 \\ GO:0002244 \\ GO:0002378 \\ GO:0006933 \\ GO:0001960 \\ GO:0006469 \\ GO:0001915 \\ GO:0035335 \\ GO:0050857 \\ GO:0030…	axon guidance (GO:0007411);B cell proliferation (GO:0042100);B cell receptor signaling pathway (GO:0050853);bone marrow development (GO:0048539);cell cycle phase transition (GO:0044770);cell surface receptor signaling pathway (GO:0007166);defense response to virus (GO:0051607);dephosphorylation (GO:0016311);hematopoietic progenitor cell differentiation (GO:0002244);immunoglobulin biosynthetic pro…	protein kinase binding (GO:0019901);protein tyrosine phosphatase activity (GO:0004725);transmembrane receptor protein tyrosine phosphatase activity (GO:0005001);	cell surface (GO:0009986);external side of plasma membrane (GO:0009897);extracellular exosome (GO:0070062);focal adhesion (GO:0005925);integral component of plasma membrane (GO:0005887);intracellular (GO:0005622);membrane (GO:0016020);membrane raft (GO:0045121);plasma membrane (GO:0005886);	3D-structure;Alternative splicing;Complete proteome;Disease mutation;Glycoprotein;Hydrolase;Membrane;Phosphoprotein;Polymorphism;Protein phosphatase;Reference proteome;Repeat;SCID;Signal;Transmembrane;Transmembrane helix.;		-0.364435	3.32288	0.671861	1	268	272	270	PTPRC
Locus_10047_Transcript_1/4_Confidence_0.400_Length_1715	1715	Locus_10047_Transcript_1/4_Confidence_0.400_Length_1715	1715	Locus_10047_Transcript_1/4_Confidence_0.400_Length_1715	1715	Q5ZKF6	89.873	1.85e-81	5NT3B_CHICK	7-methylguanosine phosphate-specific 5'-nucleotidase {ECO:0000250|UniProtKB:Q9W197}	gga:420034	GO:0005737 \\ GO:0008253 \\ GO:0000287 \\ GO:0000166 \\ GO:0009117 \\	nucleotide metabolic process (GO:0009117);	5'-nucleotidase activity (GO:0008253);magnesium ion binding (GO:0000287);nucleotide binding (GO:0000166);	cytoplasm (GO:0005737);	Complete proteome;Cytoplasm;Hydrolase;Magnesium;Metal-binding;Nucleotide metabolism;Nucleotide-binding;Reference proteome.;		-0.578186	2.68874	0.503043	1	158	186	172	5NT3B
Locus_10047_Transcript_2/4_Confidence_0.700_Length_1974	1974	Locus_10047_Transcript_2/4_Confidence_0.700_Length_1974	1974	Locus_10047_Transcript_2/4_Confidence_0.700_Length_1974	1974	Q5ZKF6	87.166	5.93e-98	5NT3B_CHICK	7-methylguanosine phosphate-specific 5'-nucleotidase {ECO:0000250|UniProtKB:Q9W197}	gga:420034	GO:0005737 \\ GO:0008253 \\ GO:0000287 \\ GO:0000166 \\ GO:0009117 \\	nucleotide metabolic process (GO:0009117);	5'-nucleotidase activity (GO:0008253);magnesium ion binding (GO:0000287);nucleotide binding (GO:0000166);	cytoplasm (GO:0005737);	Complete proteome;Cytoplasm;Hydrolase;Magnesium;Metal-binding;Nucleotide metabolism;Nucleotide-binding;Reference proteome.;		-0.439676	2.73851	0.616032	1	173	185	179	5NT3B
Locus_10047_Transcript_3/4_Confidence_0.700_Length_1794	1794	Locus_10047_Transcript_3/4_Confidence_0.700_Length_1794	1794	Locus_10047_Transcript_3/4_Confidence_0.700_Length_1794	1794	Q5ZKF6	87.889	7.38e-165	5NT3B_CHICK	7-methylguanosine phosphate-specific 5'-nucleotidase {ECO:0000250|UniProtKB:Q9W197}	gga:420034	GO:0005737 \\ GO:0008253 \\ GO:0000287 \\ GO:0000166 \\ GO:0009117 \\	nucleotide metabolic process (GO:0009117);	5'-nucleotidase activity (GO:0008253);magnesium ion binding (GO:0000287);nucleotide binding (GO:0000166);	cytoplasm (GO:0005737);	Complete proteome;Cytoplasm;Hydrolase;Magnesium;Metal-binding;Nucleotide metabolism;Nucleotide-binding;Reference proteome.;		-0.505013	2.8717	0.556049	1	185	207	196	5NT3B
Locus_10048_Transcript_1/2_Confidence_0.750_Length_5027	5027	No_sig_nr_hit	No_sig_nr_hit	No_sig_nr_hit	No_sig_nr_hit	No_Uniprotmatch	No_%_identity	No_evalue	No_ID	No_Description	No_KEGG	No_GO	No_GOCC	No_GOBP	No_GOMF	No_keywords		0.431446	-0.403819	0.74563	1	24	14	19	No
Locus_10048_Transcript_2/2_Confidence_0.750_Length_4723	4723	No_sig_nr_hit	No_sig_nr_hit	No_sig_nr_hit	No_sig_nr_hit	No_Uniprotmatch	No_%_identity	No_evalue	No_ID	No_Description	No_KEGG	No_GO	No_GOCC	No_GOBP	No_GOMF	No_keywords		1.08137	-0.453843	0.296866	1	27	10	18.5	No
Locus_10049_Transcript_2/6_Confidence_0.562_Length_2651	2651	Locus_10049_Transcript_2/6_Confidence_0.562_Length_2651	2651	Locus_10049_Transcript_2/6_Confidence_0.562_Length_2651	2651	P26261	84.536	1.16e-62	SDC3_CHICK	Syndecan-3	gga:396343	GO:0009986 \\ GO:0016021 \\ GO:0019838 \\ GO:0030154 \\ GO:0016477 \\ GO:0035988 \\ GO:0003419 \\ GO:1900026 \\	cell differentiation (GO:0030154);cell migration (GO:0016477);chondrocyte proliferation (GO:0035988);growth plate cartilage chondrocyte proliferation (GO:0003419);positive regulation of substrate adhesion-dependent cell spreading (GO:1900026);	growth factor binding (GO:0019838);	cell surface (GO:0009986);integral component of membrane (GO:0016021);	Complete proteome;Developmental protein;Differentiation;Glycoprotein;Heparan sulfate;Membrane;Proteoglycan;Reference proteome;Signal;Transmembrane;Transmembrane helix.;		-0.764534	2.81031	0.372502	1	159	213	186	SDC3
Locus_10049_Transcript_3/6_Confidence_0.688_Length_2693	2693	Locus_10049_Transcript_3/6_Confidence_0.688_Length_2693	2693	Locus_10049_Transcript_3/6_Confidence_0.688_Length_2693	2693	P26261	84.536	1.23e-62	SDC3_CHICK	Syndecan-3	gga:396343	GO:0009986 \\ GO:0016021 \\ GO:0019838 \\ GO:0030154 \\ GO:0016477 \\ GO:0035988 \\ GO:0003419 \\ GO:1900026 \\	cell differentiation (GO:0030154);cell migration (GO:0016477);chondrocyte proliferation (GO:0035988);growth plate cartilage chondrocyte proliferation (GO:0003419);positive regulation of substrate adhesion-dependent cell spreading (GO:1900026);	growth factor binding (GO:0019838);	cell surface (GO:0009986);integral component of membrane (GO:0016021);	Complete proteome;Developmental protein;Differentiation;Glycoprotein;Heparan sulfate;Membrane;Proteoglycan;Reference proteome;Signal;Transmembrane;Transmembrane helix.;		-0.677238	2.96585	0.428544	1	184	232	208	SDC3
Locus_1005_Transcript_5/6_Confidence_0.615_Length_5640	5640	Locus_1005_Transcript_5/6_Confidence_0.615_Length_5640	5640	Locus_1005_Transcript_5/6_Confidence_0.615_Length_5640	5640	Q05B87	78.322	1.62e-68	FRDA_BOVIN	Frataxin, mitochondrial	bta:505694	GO:0005829 \\ GO:0005739 \\ GO:0051537 \\ GO:0008199 \\ GO:0008198 \\ GO:0004322 \\ GO:0034986 \\ GO:0007628 \\ GO:0009060 \\ GO:0006879 \\ GO:0070301 \\ GO:0009792 \\ GO:0006783 \\ GO:0006811 \\ GO:0018283 \\ GO:0007005 \\ GO:0040015 \\ GO:0046621 \\ GO:0090201 \\ GO:0006119 \\ GO:1904234 \\ GO:0030307 \\ GO:0008284 \\ GO:0048554 \\ GO:1904231 \\ GO:0019230 \\ GO:0016540 \\ GO:0010722 \\ GO:0010…	adult walking behavior (GO:0007628);aerobic respiration (GO:0009060);cellular iron ion homeostasis (GO:0006879);cellular response to hydrogen peroxide (GO:0070301);embryo development ending in birth or egg hatching (GO:0009792);heme biosynthetic process (GO:0006783);ion transport (GO:0006811);iron incorporation into metallo-sulfur cluster (GO:0018283);mitochondrion organization (GO:0007005);negat…	2 iron, 2 sulfur cluster binding (GO:0051537);ferric iron binding (GO:0008199);ferrous iron binding (GO:0008198);ferroxidase activity (GO:0004322);iron chaperone activity (GO:0034986);	cytosol (GO:0005829);mitochondrion (GO:0005739);	Complete proteome;Cytoplasm;Heme biosynthesis;Ion transport;Iron;Iron storage;Iron transport;Mitochondrion;Oxidoreductase;Reference proteome;Transit peptide;Transport.;		0.431314	5.04419	0.60802	1	1165	681	923	FRDA
Locus_10051_Transcript_1/2_Confidence_0.667_Length_7389	7389	Locus_10051_Transcript_1/2_Confidence_0.667_Length_7389	7389	Locus_10051_Transcript_1/2_Confidence_0.667_Length_7389	7389	Q8NCL9	67.89	0	APCDL_HUMAN	Protein APCDD1-like	hsa:164284	GO:0016021 \\	No_GOBP	No_GOMF	integral component of membrane (GO:0016021);	Complete proteome;Glycoprotein;Membrane;Polymorphism;Reference proteome;Signal;Transmembrane;Transmembrane helix.;		0.688074	3.61307	0.420261	1	462	226	344	APCDL
Locus_100514_Transcript_1/1_Confidence_1.000_Length_329	329	No_sig_nr_hit	No_sig_nr_hit	No_sig_nr_hit	No_sig_nr_hit	No_Uniprotmatch	No_%_identity	No_evalue	No_ID	No_Description	No_KEGG	No_GO	No_GOCC	No_GOBP	No_GOMF	No_keywords		1.38558	-0.0165052	0.176253	1	40	12	26	No
Locus_10052_Transcript_1/3_Confidence_0.600_Length_961	961	Locus_10052_Transcript_1/3_Confidence_0.600_Length_961	961	Locus_10052_Transcript_1/3_Confidence_0.600_Length_961	961	Q63HR2	61.486	5.23e-101	TNS2_HUMAN	Tensin-2	hsa:23371	GO:0005925 \\ GO:0005622 \\ GO:0005886 \\ GO:0019900 \\ GO:0046872 \\ GO:0004721 \\ GO:0019725 \\ GO:0032963 \\ GO:0035556 \\ GO:0001822 \\ GO:0035264 \\ GO:0048871 \\ GO:0008285 \\ GO:0014850 \\	cellular homeostasis (GO:0019725);collagen metabolic process (GO:0032963);intracellular signal transduction (GO:0035556);kidney development (GO:0001822);multicellular organism growth (GO:0035264);multicellular organismal homeostasis (GO:0048871);negative regulation of cell proliferation (GO:0008285);response to muscle activity (GO:0014850);	kinase binding (GO:0019900);metal ion binding (GO:0046872);phosphoprotein phosphatase activity (GO:0004721);	focal adhesion (GO:0005925);intracellular (GO:0005622);plasma membrane (GO:0005886);	3D-structure;Alternative splicing;Cell junction;Cell membrane;Complete proteome;Hydrolase;Membrane;Metal-binding;Phosphoprotein;Polymorphism;Protein phosphatase;Reference proteome;SH2 domain;Zinc;Zinc-finger.;		0.346043	-0.545429	0.793603	1	21	13	17	TNS2
Locus_10052_Transcript_2/3_Confidence_0.600_Length_1056	1056	Locus_10052_Transcript_2/3_Confidence_0.600_Length_1056	1056	Locus_10052_Transcript_2/3_Confidence_0.600_Length_1056	1056	Q63HR2	70.423	5.92e-55	TNS2_HUMAN	Tensin-2	hsa:23371	GO:0005925 \\ GO:0005622 \\ GO:0005886 \\ GO:0019900 \\ GO:0046872 \\ GO:0004721 \\ GO:0019725 \\ GO:0032963 \\ GO:0035556 \\ GO:0001822 \\ GO:0035264 \\ GO:0048871 \\ GO:0008285 \\ GO:0014850 \\	cellular homeostasis (GO:0019725);collagen metabolic process (GO:0032963);intracellular signal transduction (GO:0035556);kidney development (GO:0001822);multicellular organism growth (GO:0035264);multicellular organismal homeostasis (GO:0048871);negative regulation of cell proliferation (GO:0008285);response to muscle activity (GO:0014850);	kinase binding (GO:0019900);metal ion binding (GO:0046872);phosphoprotein phosphatase activity (GO:0004721);	focal adhesion (GO:0005925);intracellular (GO:0005622);plasma membrane (GO:0005886);	3D-structure;Alternative splicing;Cell junction;Cell membrane;Complete proteome;Hydrolase;Membrane;Metal-binding;Phosphoprotein;Polymorphism;Protein phosphatase;Reference proteome;SH2 domain;Zinc;Zinc-finger.;		0.428509	1.26297	0.637774	1	82	48	65	TNS2
Locus_10052_Transcript_3/3_Confidence_0.600_Length_1470	1470	Locus_10052_Transcript_3/3_Confidence_0.600_Length_1470	1470	Locus_10052_Transcript_3/3_Confidence_0.600_Length_1470	1470	Q63HR2	63.343	5.88e-123	TNS2_HUMAN	Tensin-2	hsa:23371	GO:0005925 \\ GO:0005622 \\ GO:0005886 \\ GO:0019900 \\ GO:0046872 \\ GO:0004721 \\ GO:0019725 \\ GO:0032963 \\ GO:0035556 \\ GO:0001822 \\ GO:0035264 \\ GO:0048871 \\ GO:0008285 \\ GO:0014850 \\	cellular homeostasis (GO:0019725);collagen metabolic process (GO:0032963);intracellular signal transduction (GO:0035556);kidney development (GO:0001822);multicellular organism growth (GO:0035264);multicellular organismal homeostasis (GO:0048871);negative regulation of cell proliferation (GO:0008285);response to muscle activity (GO:0014850);	kinase binding (GO:0019900);metal ion binding (GO:0046872);phosphoprotein phosphatase activity (GO:0004721);	focal adhesion (GO:0005925);intracellular (GO:0005622);plasma membrane (GO:0005886);	3D-structure;Alternative splicing;Cell junction;Cell membrane;Complete proteome;Hydrolase;Membrane;Metal-binding;Phosphoprotein;Polymorphism;Protein phosphatase;Reference proteome;SH2 domain;Zinc;Zinc-finger.;		0.611545	1.81624	0.481825	1	128	66	97	TNS2
Locus_10055_Transcript_1/1_Confidence_1.000_Length_3051	3051	Locus_10055_Transcript_1/1_Confidence_1.000_Length_3051	3051	Locus_10055_Transcript_1/1_Confidence_1.000_Length_3051	3051	Q53GL7	52.406	3.12e-50	PAR10_HUMAN	Poly [ADP-ribose] polymerase 10	hsa:84875	GO:0005737 \\ GO:0005794 \\ GO:0005730 \\ GO:0005654 \\ GO:0005634 \\ GO:0070530 \\ GO:0003950 \\ GO:0048147 \\ GO:0010629 \\ GO:0032088 \\ GO:0033159 \\ GO:1900045 \\ GO:0045071 \\ GO:0006471 \\ GO:0070213 \\ GO:0070212 \\ GO:0010847 \\	negative regulation of fibroblast proliferation (GO:0048147);negative regulation of gene expression (GO:0010629);negative regulation of NF-kappaB transcription factor activity (GO:0032088);negative regulation of protein import into nucleus, translocation (GO:0033159);negative regulation of protein K63-linked ubiquitination (GO:1900045);negative regulation of viral genome replication (GO:0045071);…	K63-linked polyubiquitin binding (GO:0070530);NAD+ ADP-ribosyltransferase activity (GO:0003950);	cytoplasm (GO:0005737);Golgi apparatus (GO:0005794);nucleolus (GO:0005730);nucleoplasm (GO:0005654);nucleus (GO:0005634);	3D-structure;Acetylation;Complete proteome;Cytoplasm;Glycosyltransferase;NAD;Nucleus;Phosphoprotein;Polymorphism;Reference proteome;Transferase.;		-0.00106317	3.47756	1	1	341	269	305	PAR10
Locus_10057_Transcript_1/2_Confidence_0.750_Length_2188	2188	Locus_10057_Transcript_1/2_Confidence_0.750_Length_2188	2188	Locus_10057_Transcript_1/2_Confidence_0.750_Length_2188	2188	Q5R7Q3	85.596	4.94e-165	NIPA2_PONAB	Magnesium transporter NIPA2	pon:100173267	GO:0005769 \\ GO:0016021 \\ GO:0005886 \\ GO:0015095 \\ GO:0015693 \\	magnesium ion transport (GO:0015693);	magnesium ion transmembrane transporter activity (GO:0015095);	early endosome (GO:0005769);integral component of membrane (GO:0016021);plasma membrane (GO:0005886);	Cell membrane;Complete proteome;Endosome;Ion transport;Magnesium;Membrane;Reference proteome;Transmembrane;Transmembrane helix;Transport.;		0.54978	5.07917	0.512406	1	1235	665	950	NIPA2
Locus_10058_Transcript_1/1_Confidence_1.000_Length_3173	3173	Locus_10058_Transcript_1/1_Confidence_1.000_Length_3173	3173	Locus_10058_Transcript_1/1_Confidence_1.000_Length_3173	3173	O75626	77.913	0	PRDM1_HUMAN	PR domain zinc finger protein 1	hsa:639	GO:0005737 \\ GO:0005634 \\ GO:0046872 \\ GO:0008168 \\ GO:0000978 \\ GO:0003700 \\ GO:0001078 \\ GO:0035904 \\ GO:0048844 \\ GO:0045165 \\ GO:0060976 \\ GO:0042462 \\ GO:0007281 \\ GO:0003170 \\ GO:0060576 \\ GO:0001893 \\ GO:0001763 \\ GO:0030889 \\ GO:0031665 \\ GO:0000122 \\ GO:0045579 \\ GO:0010628 \\ GO:0009791 \\ GO:1990654 \\ GO:0006351 \\ GO:0060707 \\ GO:0003281 \\	aorta development (GO:0035904);artery morphogenesis (GO:0048844);cell fate commitment (GO:0045165);coronary vasculature development (GO:0060976);eye photoreceptor cell development (GO:0042462);germ cell development (GO:0007281);heart valve development (GO:0003170);intestinal epithelial cell development (GO:0060576);maternal placenta development (GO:0001893);morphogenesis of a branching structure …	metal ion binding (GO:0046872);methyltransferase activity (GO:0008168);RNA polymerase II core promoter proximal region sequence-specific DNA binding (GO:0000978);transcription factor activity, sequence-specific DNA binding (GO:0003700);transcriptional repressor activity, RNA polymerase II core promoter proximal region sequence-specific binding (GO:0001078);	cytoplasm (GO:0005737);nucleus (GO:0005634);	3D-structure;Alternative splicing;Complete proteome;Cytoplasm;DNA-binding;Isopeptide bond;Metal-binding;Methyltransferase;Nucleus;Polymorphism;Reference proteome;Repeat;Repressor;S-adenosyl-L-methionine;Transcription;Transcription regulation;Transferase;Ubl conjugation;Zinc;Zinc-finger.;		-1.72046	0.721418	0.0663057	1	23	60	41.5	PRDM1
Locus_1006_Transcript_1/4_Confidence_0.600_Length_1117	1117	Locus_1006_Transcript_1/4_Confidence_0.600_Length_1117	1117	Locus_1006_Transcript_1/4_Confidence_0.600_Length_1117	1117	P59999	94.815	1.61e-82	ARPC4_MOUSE	Actin-related protein 2/3 complex subunit 4	mmu:68089	GO:0005885 \\ GO:0042995 \\ GO:0005737 \\ GO:0070062 \\ GO:0019899 \\ GO:0005200 \\ GO:0030041 \\ GO:0034314 \\	actin filament polymerization (GO:0030041);Arp2/3 complex-mediated actin nucleation (GO:0034314);	enzyme binding (GO:0019899);structural constituent of cytoskeleton (GO:0005200);	Arp2/3 protein complex (GO:0005885);cell projection (GO:0042995);cytoplasm (GO:0005737);extracellular exosome (GO:0070062);	Acetylation;Actin-binding;Cell projection;Complete proteome;Cytoplasm;Cytoskeleton;Direct protein sequencing;Reference proteome.;		-1.00161	4.35755	0.237399	1	420	663	541.5	ARPC4
Locus_1006_Transcript_2/4_Confidence_0.500_Length_897	897	Locus_1006_Transcript_2/4_Confidence_0.500_Length_897	897	Locus_1006_Transcript_2/4_Confidence_0.500_Length_897	897	P59999	100	1.82e-57	ARPC4_MOUSE	Actin-related protein 2/3 complex subunit 4	mmu:68089	GO:0005885 \\ GO:0042995 \\ GO:0005737 \\ GO:0070062 \\ GO:0019899 \\ GO:0005200 \\ GO:0030041 \\ GO:0034314 \\	actin filament polymerization (GO:0030041);Arp2/3 complex-mediated actin nucleation (GO:0034314);	enzyme binding (GO:0019899);structural constituent of cytoskeleton (GO:0005200);	Arp2/3 protein complex (GO:0005885);cell projection (GO:0042995);cytoplasm (GO:0005737);extracellular exosome (GO:0070062);	Acetylation;Actin-binding;Cell projection;Complete proteome;Cytoplasm;Cytoskeleton;Direct protein sequencing;Reference proteome.;		-0.708269	4.56295	0.400649	1	552	711	631.5	ARPC4
Locus_1006_Transcript_3/4_Confidence_0.600_Length_1187	1187	Locus_1006_Transcript_3/4_Confidence_0.600_Length_1187	1187	Locus_1006_Transcript_3/4_Confidence_0.600_Length_1187	1187	P59999	94.815	3.27e-82	ARPC4_MOUSE	Actin-related protein 2/3 complex subunit 4	mmu:68089	GO:0005885 \\ GO:0042995 \\ GO:0005737 \\ GO:0070062 \\ GO:0019899 \\ GO:0005200 \\ GO:0030041 \\ GO:0034314 \\	actin filament polymerization (GO:0030041);Arp2/3 complex-mediated actin nucleation (GO:0034314);	enzyme binding (GO:0019899);structural constituent of cytoskeleton (GO:0005200);	Arp2/3 protein complex (GO:0005885);cell projection (GO:0042995);cytoplasm (GO:0005737);extracellular exosome (GO:0070062);	Acetylation;Actin-binding;Cell projection;Complete proteome;Cytoplasm;Cytoskeleton;Direct protein sequencing;Reference proteome.;		-0.659056	4.34953	0.434453	1	486	605	545.5	ARPC4
Locus_1006_Transcript_4/4_Confidence_0.400_Length_780	780	Locus_1006_Transcript_4/4_Confidence_0.400_Length_780	780	Locus_1006_Transcript_4/4_Confidence_0.400_Length_780	780	P59999	94.853	5.93e-85	ARPC4_MOUSE	Actin-related protein 2/3 complex subunit 4	mmu:68089	GO:0005885 \\ GO:0042995 \\ GO:0005737 \\ GO:0070062 \\ GO:0019899 \\ GO:0005200 \\ GO:0030041 \\ GO:0034314 \\	actin filament polymerization (GO:0030041);Arp2/3 complex-mediated actin nucleation (GO:0034314);	enzyme binding (GO:0019899);structural constituent of cytoskeleton (GO:0005200);	Arp2/3 protein complex (GO:0005885);cell projection (GO:0042995);cytoplasm (GO:0005737);extracellular exosome (GO:0070062);	Acetylation;Actin-binding;Cell projection;Complete proteome;Cytoplasm;Cytoskeleton;Direct protein sequencing;Reference proteome.;		-0.803341	4.84435	0.340976	1	644	886	765	ARPC4
Locus_100604_Transcript_1/1_Confidence_1.000_Length_515	515	No_sig_nr_hit	No_sig_nr_hit	No_sig_nr_hit	No_sig_nr_hit	No_Uniprotmatch	No_%_identity	No_evalue	No_ID	No_Description	No_KEGG	No_GO	No_GOCC	No_GOBP	No_GOMF	No_keywords		-1.225	0.186531	0.211915	1	20	37	28.5	No
Locus_10062_Transcript_9/10_Confidence_0.077_Length_4976	4976	Locus_10062_Transcript_9/10_Confidence_0.077_Length_4976	4976	Locus_10062_Transcript_9/10_Confidence_0.077_Length_4976	4976	Q5ZKF4	94.253	0	HM20A_CHICK	High mobility group protein 20A	gga:415346	GO:0005634 \\ GO:0003677 \\ GO:0006355 \\ GO:0006351 \\	regulation of transcription, DNA-templated (GO:0006355);transcription, DNA-templated (GO:0006351);	DNA binding (GO:0003677);	nucleus (GO:0005634);	Coiled coil;Complete proteome;DNA-binding;Nucleus;Reference proteome;Transcription;Transcription regulation.;		0.37987	2.83574	0.663787	1	246	149	197.5	HM20A
Locus_10064_Transcript_1/3_Confidence_0.714_Length_3755	3755	Locus_10064_Transcript_1/3_Confidence_0.714_Length_3755	3755	Locus_10064_Transcript_1/3_Confidence_0.714_Length_3755	3755	Q56P03	64.234	2.27e-85	EAPP_HUMAN	E2F-associated phosphoprotein	hsa:55837	GO:0005737 \\ GO:0005794 \\ GO:0005634 \\ GO:0034244 \\ GO:0008284 \\ GO:0032968 \\	negative regulation of transcription elongation from RNA polymerase II promoter (GO:0034244);positive regulation of cell proliferation (GO:0008284);positive regulation of transcription elongation from RNA polymerase II promoter (GO:0032968);	No_GOMF	cytoplasm (GO:0005737);Golgi apparatus (GO:0005794);nucleus (GO:0005634);	Acetylation;Complete proteome;Cytoplasm;Nucleus;Phosphoprotein;Polymorphism;Reference proteome.;		0.344052	3.02048	0.69106	1	277	172	224.5	EAPP
Locus_10064_Transcript_2/3_Confidence_0.714_Length_4532	4532	Locus_10064_Transcript_2/3_Confidence_0.714_Length_4532	4532	Locus_10064_Transcript_2/3_Confidence_0.714_Length_4532	4532	Q56P03	67.978	1.12e-43	EAPP_HUMAN	E2F-associated phosphoprotein	hsa:55837	GO:0005737 \\ GO:0005794 \\ GO:0005634 \\ GO:0034244 \\ GO:0008284 \\ GO:0032968 \\	negative regulation of transcription elongation from RNA polymerase II promoter (GO:0034244);positive regulation of cell proliferation (GO:0008284);positive regulation of transcription elongation from RNA polymerase II promoter (GO:0032968);	No_GOMF	cytoplasm (GO:0005737);Golgi apparatus (GO:0005794);nucleus (GO:0005634);	Acetylation;Complete proteome;Cytoplasm;Nucleus;Phosphoprotein;Polymorphism;Reference proteome.;		0.163096	3.10144	0.854322	1	277	195	236	EAPP
Locus_10065_Transcript_4/6_Confidence_0.588_Length_368	368	No_sig_nr_hit	No_sig_nr_hit	No_sig_nr_hit	No_sig_nr_hit	No_Uniprotmatch	No_%_identity	No_evalue	No_ID	No_Description	No_KEGG	No_GO	No_GOCC	No_GOBP	No_GOMF	No_keywords		0.0487581	-0.428357	1	1	21	16	18.5	No
Locus_10065_Transcript_5/6_Confidence_0.588_Length_722	722	No_sig_nr_hit	No_sig_nr_hit	No_sig_nr_hit	No_sig_nr_hit	R7VX65	31.551	5.67e-15	R7VX65_COLLI	Uncharacterized protein {ECO:0000313|EMBL:EMC87722.1}	No_KEGG	GO:0016021 \\	No_GOBP	No_GOMF	integral component of membrane (GO:0016021);	Complete proteome {ECO:0000313|Proteomes:UP000053872};Membrane {ECO:0000256|SAM:Phobius};Transmembrane {ECO:0000256|SAM:Phobius};Transmembrane helix {ECO:0000256|SAM:Phobius}.;		-0.718405	1.32411	0.43748	1	57	74	65.5	R7VX65
Locus_10066_Transcript_1/2_Confidence_0.750_Length_3074	3074	Locus_10066_Transcript_1/2_Confidence_0.750_Length_3074	3074	Locus_10066_Transcript_1/2_Confidence_0.750_Length_3074	3074	Q5C9Z4	73.643	0	NOM1_HUMAN	Nucleolar MIF4G domain-containing protein 1	hsa:64434	GO:0005730 \\ GO:0005634 \\ GO:0044822 \\ GO:0003723 \\ GO:0022008 \\ GO:0042274 \\	neurogenesis (GO:0022008);ribosomal small subunit biogenesis (GO:0042274);	poly(A) RNA binding (GO:0044822);RNA binding (GO:0003723);	nucleolus (GO:0005730);nucleus (GO:0005634);	Complete proteome;Nucleus;Phosphoprotein;Polymorphism;Reference proteome.;		-0.0909259	1.85643	0.931002	1	106	89	97.5	NOM1
Locus_10066_Transcript_2/2_Confidence_0.750_Length_3053	3053	Locus_10066_Transcript_2/2_Confidence_0.750_Length_3053	3053	Locus_10066_Transcript_2/2_Confidence_0.750_Length_3053	3053	Q5C9Z4	73.643	0	NOM1_HUMAN	Nucleolar MIF4G domain-containing protein 1	hsa:64434	GO:0005730 \\ GO:0005634 \\ GO:0044822 \\ GO:0003723 \\ GO:0022008 \\ GO:0042274 \\	neurogenesis (GO:0022008);ribosomal small subunit biogenesis (GO:0042274);	poly(A) RNA binding (GO:0044822);RNA binding (GO:0003723);	nucleolus (GO:0005730);nucleus (GO:0005634);	Complete proteome;Nucleus;Phosphoprotein;Polymorphism;Reference proteome.;		-0.0743112	1.76585	0.955931	1	100	83	91.5	NOM1
Locus_10069_Transcript_1/1_Confidence_1.000_Length_2265	2265	Locus_10069_Transcript_1/1_Confidence_1.000_Length_2265	2265	Locus_10069_Transcript_1/1_Confidence_1.000_Length_2265	2265	Q4V7C9	91.304	5.62e-74	NKAP_RAT	NF-kappa-B-activating protein	rno:298342	GO:0005634 \\ GO:0003682 \\ GO:0045892 \\ GO:0007219 \\ GO:0046638 \\ GO:0006351 \\	negative regulation of transcription, DNA-templated (GO:0045892);Notch signaling pathway (GO:0007219);positive regulation of alpha-beta T cell differentiation (GO:0046638);transcription, DNA-templated (GO:0006351);	chromatin binding (GO:0003682);	nucleus (GO:0005634);	Acetylation;Complete proteome;Notch signaling pathway;Nucleus;Phosphoprotein;Reference proteome;Repressor;Transcription;Transcription regulation.;		0.346844	4.48123	0.68039	1	768	476	622	NKAP
Locus_10070_Transcript_3/5_Confidence_0.250_Length_662	662	Locus_10070_Transcript_3/5_Confidence_0.250_Length_662	662	Locus_10070_Transcript_3/5_Confidence_0.250_Length_662	662	Q4U116	93.182	1.15e-19	S4A4_PIG	Electrogenic sodium bicarbonate cotransporter 1	ssc:503546	GO:0016323 \\ GO:0016021 \\ GO:0008509 \\ GO:0005452 \\ GO:0008510 \\ GO:0098656 \\ GO:0015701 \\ GO:0035725 \\ GO:0006814 \\	anion transmembrane transport (GO:0098656);bicarbonate transport (GO:0015701);sodium ion transmembrane transport (GO:0035725);sodium ion transport (GO:0006814);	anion transmembrane transporter activity (GO:0008509);inorganic anion exchanger activity (GO:0005452);sodium (GO:0008510);	basolateral plasma membrane (GO:0016323);integral component of membrane (GO:0016021);	Alternative splicing;Cell membrane;Complete proteome;Disulfide bond;Glycoprotein;Ion transport;Membrane;Phosphoprotein;Reference proteome;Sodium;Sodium transport;Symport;Transmembrane;Transmembrane helix;Transport.;		-0.63726	-0.725042	0.5462	1	13	16	14.5	S4A4
Locus_10070_Transcript_4/5_Confidence_0.583_Length_3748	3748	Locus_10070_Transcript_4/5_Confidence_0.583_Length_3748	3748	Locus_10070_Transcript_4/5_Confidence_0.583_Length_3748	3748	Q4U116	92.558	0	S4A4_PIG	Electrogenic sodium bicarbonate cotransporter 1	ssc:503546	GO:0016323 \\ GO:0016021 \\ GO:0008509 \\ GO:0005452 \\ GO:0008510 \\ GO:0098656 \\ GO:0015701 \\ GO:0035725 \\ GO:0006814 \\	anion transmembrane transport (GO:0098656);bicarbonate transport (GO:0015701);sodium ion transmembrane transport (GO:0035725);sodium ion transport (GO:0006814);	anion transmembrane transporter activity (GO:0008509);inorganic anion exchanger activity (GO:0005452);sodium (GO:0008510);	basolateral plasma membrane (GO:0016323);integral component of membrane (GO:0016021);	Alternative splicing;Cell membrane;Complete proteome;Disulfide bond;Glycoprotein;Ion transport;Membrane;Phosphoprotein;Reference proteome;Sodium;Sodium transport;Symport;Transmembrane;Transmembrane helix;Transport.;		-1.52255	3.13264	0.0780798	1	139	315	227	S4A4
Locus_10070_Transcript_5/5_Confidence_0.667_Length_3721	3721	Locus_10070_Transcript_5/5_Confidence_0.667_Length_3721	3721	Locus_10070_Transcript_5/5_Confidence_0.667_Length_3721	3721	Q4U116	92	0	S4A4_PIG	Electrogenic sodium bicarbonate cotransporter 1	ssc:503546	GO:0016323 \\ GO:0016021 \\ GO:0008509 \\ GO:0005452 \\ GO:0008510 \\ GO:0098656 \\ GO:0015701 \\ GO:0035725 \\ GO:0006814 \\	anion transmembrane transport (GO:0098656);bicarbonate transport (GO:0015701);sodium ion transmembrane transport (GO:0035725);sodium ion transport (GO:0006814);	anion transmembrane transporter activity (GO:0008509);inorganic anion exchanger activity (GO:0005452);sodium (GO:0008510);	basolateral plasma membrane (GO:0016323);integral component of membrane (GO:0016021);	Alternative splicing;Cell membrane;Complete proteome;Disulfide bond;Glycoprotein;Ion transport;Membrane;Phosphoprotein;Reference proteome;Sodium;Sodium transport;Symport;Transmembrane;Transmembrane helix;Transport.;		-1.39161	3.08824	0.108654	1	144	298	221	S4A4
Locus_10072_Transcript_1/1_Confidence_1.000_Length_1975	1975	Locus_10072_Transcript_1/1_Confidence_1.000_Length_1975	1975	Locus_10072_Transcript_1/1_Confidence_1.000_Length_1975	1975	Q8BHN9	39.683	8.59e-37	CN079_MOUSE	Uncharacterized protein C14orf79 homolog	mmu:217887	GO:0005737 \\ GO:0030276 \\ GO:0046907 \\	intracellular transport (GO:0046907);	clathrin binding (GO:0030276);	cytoplasm (GO:0005737);	Complete proteome;Reference proteome.;		-1.53342	0.171443	0.115805	1	17	39	28	CN079
Locus_10073_Transcript_1/4_Confidence_0.600_Length_2824	2824	Locus_10073_Transcript_1/4_Confidence_0.600_Length_2824	2824	Locus_10073_Transcript_1/4_Confidence_0.600_Length_2824	2824	Q8VEI3	56.89	2.46e-66	HYAL3_MOUSE	Hyaluronidase-3	mmu:109685	GO:0031410 \\ GO:0005576 \\ GO:0005764 \\ GO:0033906 \\ GO:0004415 \\ GO:0005975 \\ GO:0051216 \\ GO:0071347 \\ GO:0071356 \\ GO:0071493 \\ GO:0030214 \\ GO:0006954 \\ GO:0046677 \\ GO:0009615 \\	carbohydrate metabolic process (GO:0005975);cartilage development (GO:0051216);cellular response to interleukin-1 (GO:0071347);cellular response to tumor necrosis factor (GO:0071356);cellular response to UV-B (GO:0071493);hyaluronan catabolic process (GO:0030214);inflammatory response (GO:0006954);response to antibiotic (GO:0046677);response to virus (GO:0009615);	hyaluronoglucuronidase activity (GO:0033906);hyalurononglucosaminidase activity (GO:0004415);	cytoplasmic vesicle (GO:0031410);extracellular region (GO:0005576);lysosome (GO:0005764);	Complete proteome;Disulfide bond;EGF-like domain;Glycoprotein;Glycosidase;Hydrolase;Lysosome;Reference proteome;Secreted;Signal.;		0.00190066	0.674764	1	1	47	37	42	HYAL3
Locus_10073_Transcript_2/4_Confidence_0.700_Length_2610	2610	Locus_10073_Transcript_2/4_Confidence_0.700_Length_2610	2610	Locus_10073_Transcript_2/4_Confidence_0.700_Length_2610	2610	Q8VEI3	57.743	3.69e-109	HYAL3_MOUSE	Hyaluronidase-3	mmu:109685	GO:0031410 \\ GO:0005576 \\ GO:0005764 \\ GO:0033906 \\ GO:0004415 \\ GO:0005975 \\ GO:0051216 \\ GO:0071347 \\ GO:0071356 \\ GO:0071493 \\ GO:0030214 \\ GO:0006954 \\ GO:0046677 \\ GO:0009615 \\	carbohydrate metabolic process (GO:0005975);cartilage development (GO:0051216);cellular response to interleukin-1 (GO:0071347);cellular response to tumor necrosis factor (GO:0071356);cellular response to UV-B (GO:0071493);hyaluronan catabolic process (GO:0030214);inflammatory response (GO:0006954);response to antibiotic (GO:0046677);response to virus (GO:0009615);	hyaluronoglucuronidase activity (GO:0033906);hyalurononglucosaminidase activity (GO:0004415);	cytoplasmic vesicle (GO:0031410);extracellular region (GO:0005576);lysosome (GO:0005764);	Complete proteome;Disulfide bond;EGF-like domain;Glycoprotein;Glycosidase;Hydrolase;Lysosome;Reference proteome;Secreted;Signal.;		-0.227187	0.925227	0.818914	1	52	48	50	HYAL3
Locus_10073_Transcript_3/4_Confidence_0.700_Length_2694	2694	Locus_10073_Transcript_3/4_Confidence_0.700_Length_2694	2694	Locus_10073_Transcript_3/4_Confidence_0.700_Length_2694	2694	Q8VEI3	54.034	8.74e-104	HYAL3_MOUSE	Hyaluronidase-3	mmu:109685	GO:0031410 \\ GO:0005576 \\ GO:0005764 \\ GO:0033906 \\ GO:0004415 \\ GO:0005975 \\ GO:0051216 \\ GO:0071347 \\ GO:0071356 \\ GO:0071493 \\ GO:0030214 \\ GO:0006954 \\ GO:0046677 \\ GO:0009615 \\	carbohydrate metabolic process (GO:0005975);cartilage development (GO:0051216);cellular response to interleukin-1 (GO:0071347);cellular response to tumor necrosis factor (GO:0071356);cellular response to UV-B (GO:0071493);hyaluronan catabolic process (GO:0030214);inflammatory response (GO:0006954);response to antibiotic (GO:0046677);response to virus (GO:0009615);	hyaluronoglucuronidase activity (GO:0033906);hyalurononglucosaminidase activity (GO:0004415);	cytoplasmic vesicle (GO:0031410);extracellular region (GO:0005576);lysosome (GO:0005764);	Complete proteome;Disulfide bond;EGF-like domain;Glycoprotein;Glycosidase;Hydrolase;Lysosome;Reference proteome;Secreted;Signal.;		0.0321852	0.689887	1	1	48	37	42.5	HYAL3
Locus_10075_Transcript_2/4_Confidence_0.286_Length_1185	1185	Locus_10075_Transcript_2/4_Confidence_0.286_Length_1185	1185	Locus_10075_Transcript_2/4_Confidence_0.286_Length_1185	1185	Q8AY68	97.561	1.61e-17	SHC1_XENLA	SHC-transforming protein 1	xla:399198	GO:0005737 \\ GO:0001525 \\ GO:0035556 \\ GO:0040008 \\	angiogenesis (GO:0001525);intracellular signal transduction (GO:0035556);regulation of growth (GO:0040008);	No_GOMF	cytoplasm (GO:0005737);	Cytoplasm;Growth regulation;SH2 domain.;		0.63705	3.31084	0.455694	1	369	187	278	SHC1
Locus_10075_Transcript_3/4_Confidence_0.429_Length_4504	4504	Locus_10075_Transcript_3/4_Confidence_0.429_Length_4504	4504	Locus_10075_Transcript_3/4_Confidence_0.429_Length_4504	4504	Q8AY68	82.816	0	SHC1_XENLA	SHC-transforming protein 1	xla:399198	GO:0005737 \\ GO:0001525 \\ GO:0035556 \\ GO:0040008 \\	angiogenesis (GO:0001525);intracellular signal transduction (GO:0035556);regulation of growth (GO:0040008);	No_GOMF	cytoplasm (GO:0005737);	Cytoplasm;Growth regulation;SH2 domain.;		0.00359479	4.54051	0.997833	1	716	563	639.5	SHC1
Locus_10075_Transcript_4/4_Confidence_0.571_Length_2884	2884	Locus_10075_Transcript_4/4_Confidence_0.571_Length_2884	2884	Locus_10075_Transcript_4/4_Confidence_0.571_Length_2884	2884	Q8AY68	82.816	0	SHC1_XENLA	SHC-transforming protein 1	xla:399198	GO:0005737 \\ GO:0001525 \\ GO:0035556 \\ GO:0040008 \\	angiogenesis (GO:0001525);intracellular signal transduction (GO:0035556);regulation of growth (GO:0040008);	No_GOMF	cytoplasm (GO:0005737);	Cytoplasm;Growth regulation;SH2 domain.;		0.0419295	4.52362	0.960551	1	717	549	633	SHC1
Locus_10077_Transcript_1/6_Confidence_0.400_Length_938	938	Locus_10077_Transcript_1/6_Confidence_0.400_Length_938	938	Locus_10077_Transcript_1/6_Confidence_0.400_Length_938	938	Q9CXK4	55.155	4.38e-50	SWET1_MOUSE	Sugar transporter SWEET1	mmu:19729	GO:0005794 \\ GO:0000139 \\ GO:0016021 \\ GO:0005634 \\ GO:0005886 \\ GO:0042947 \\ GO:0051119 \\ GO:0034219 \\ GO:0008643 \\ GO:0042946 \\ GO:0045815 \\	carbohydrate transmembrane transport (GO:0034219);carbohydrate transport (GO:0008643);glucoside transport (GO:0042946);positive regulation of gene expression, epigenetic (GO:0045815);	glucoside transmembrane transporter activity (GO:0042947);sugar transmembrane transporter activity (GO:0051119);	Golgi apparatus (GO:0005794);Golgi membrane (GO:0000139);integral component of membrane (GO:0016021);nucleus (GO:0005634);plasma membrane (GO:0005886);	Cell membrane;Complete proteome;Golgi apparatus;Membrane;Reference proteome;Repeat;Sugar transport;Transmembrane;Transmembrane helix;Transport.;		-0.305741	0.60214	0.743843	1	40	39	39.5	SWET1
Locus_10077_Transcript_2/6_Confidence_0.333_Length_779	779	Locus_10077_Transcript_2/6_Confidence_0.333_Length_779	779	Locus_10077_Transcript_2/6_Confidence_0.333_Length_779	779	Q9CXK4	76.119	9.83e-27	SWET1_MOUSE	Sugar transporter SWEET1	mmu:19729	GO:0005794 \\ GO:0000139 \\ GO:0016021 \\ GO:0005634 \\ GO:0005886 \\ GO:0042947 \\ GO:0051119 \\ GO:0034219 \\ GO:0008643 \\ GO:0042946 \\ GO:0045815 \\	carbohydrate transmembrane transport (GO:0034219);carbohydrate transport (GO:0008643);glucoside transport (GO:0042946);positive regulation of gene expression, epigenetic (GO:0045815);	glucoside transmembrane transporter activity (GO:0042947);sugar transmembrane transporter activity (GO:0051119);	Golgi apparatus (GO:0005794);Golgi membrane (GO:0000139);integral component of membrane (GO:0016021);nucleus (GO:0005634);plasma membrane (GO:0005886);	Cell membrane;Complete proteome;Golgi apparatus;Membrane;Reference proteome;Repeat;Sugar transport;Transmembrane;Transmembrane helix;Transport.;		0.689378	0.215124	0.518437	1	41	20	30.5	SWET1
Locus_10077_Transcript_3/6_Confidence_0.467_Length_1124	1124	Locus_10077_Transcript_3/6_Confidence_0.467_Length_1124	1124	Locus_10077_Transcript_3/6_Confidence_0.467_Length_1124	1124	Q9CXK4	60.185	7.01e-71	SWET1_MOUSE	Sugar transporter SWEET1	mmu:19729	GO:0005794 \\ GO:0000139 \\ GO:0016021 \\ GO:0005634 \\ GO:0005886 \\ GO:0042947 \\ GO:0051119 \\ GO:0034219 \\ GO:0008643 \\ GO:0042946 \\ GO:0045815 \\	carbohydrate transmembrane transport (GO:0034219);carbohydrate transport (GO:0008643);glucoside transport (GO:0042946);positive regulation of gene expression, epigenetic (GO:0045815);	glucoside transmembrane transporter activity (GO:0042947);sugar transmembrane transporter activity (GO:0051119);	Golgi apparatus (GO:0005794);Golgi membrane (GO:0000139);integral component of membrane (GO:0016021);nucleus (GO:0005634);plasma membrane (GO:0005886);	Cell membrane;Complete proteome;Golgi apparatus;Membrane;Reference proteome;Repeat;Sugar transport;Transmembrane;Transmembrane helix;Transport.;		0.463035	1.02921	0.622137	1	70	40	55	SWET1
Locus_10077_Transcript_4/6_Confidence_0.600_Length_1068	1068	Locus_10077_Transcript_4/6_Confidence_0.600_Length_1068	1068	Locus_10077_Transcript_4/6_Confidence_0.600_Length_1068	1068	Q9CXK4	61.14	7.65e-62	SWET1_MOUSE	Sugar transporter SWEET1	mmu:19729	GO:0005794 \\ GO:0000139 \\ GO:0016021 \\ GO:0005634 \\ GO:0005886 \\ GO:0042947 \\ GO:0051119 \\ GO:0034219 \\ GO:0008643 \\ GO:0042946 \\ GO:0045815 \\	carbohydrate transmembrane transport (GO:0034219);carbohydrate transport (GO:0008643);glucoside transport (GO:0042946);positive regulation of gene expression, epigenetic (GO:0045815);	glucoside transmembrane transporter activity (GO:0042947);sugar transmembrane transporter activity (GO:0051119);	Golgi apparatus (GO:0005794);Golgi membrane (GO:0000139);integral component of membrane (GO:0016021);nucleus (GO:0005634);plasma membrane (GO:0005886);	Cell membrane;Complete proteome;Golgi apparatus;Membrane;Reference proteome;Repeat;Sugar transport;Transmembrane;Transmembrane helix;Transport.;		0.24128	1.3237	0.803024	1	81	54	67.5	SWET1
Locus_10077_Transcript_5/6_Confidence_0.533_Length_1314	1314	Locus_10077_Transcript_5/6_Confidence_0.533_Length_1314	1314	Locus_10077_Transcript_5/6_Confidence_0.533_Length_1314	1314	Q9CXK4	50.556	2.43e-45	SWET1_MOUSE	Sugar transporter SWEET1	mmu:19729	GO:0005794 \\ GO:0000139 \\ GO:0016021 \\ GO:0005634 \\ GO:0005886 \\ GO:0042947 \\ GO:0051119 \\ GO:0034219 \\ GO:0008643 \\ GO:0042946 \\ GO:0045815 \\	carbohydrate transmembrane transport (GO:0034219);carbohydrate transport (GO:0008643);glucoside transport (GO:0042946);positive regulation of gene expression, epigenetic (GO:0045815);	glucoside transmembrane transporter activity (GO:0042947);sugar transmembrane transporter activity (GO:0051119);	Golgi apparatus (GO:0005794);Golgi membrane (GO:0000139);integral component of membrane (GO:0016021);nucleus (GO:0005634);plasma membrane (GO:0005886);	Cell membrane;Complete proteome;Golgi apparatus;Membrane;Reference proteome;Repeat;Sugar transport;Transmembrane;Transmembrane helix;Transport.;		0.533879	0.718552	0.569647	1	57	31	44	SWET1
Locus_10078_Transcript_1/2_Confidence_0.750_Length_927	927	Locus_10078_Transcript_1/2_Confidence_0.750_Length_927	927	Locus_10078_Transcript_1/2_Confidence_0.750_Length_927	927	P52912	84.887	6.63e-178	TIA1_MOUSE	Nucleolysin TIA-1	No_KEGG	GO:0005737 \\ GO:0010494 \\ GO:0097165 \\ GO:0005654 \\ GO:0005634 \\ GO:0017091 \\ GO:0000166 \\ GO:0044822 \\ GO:0006915 \\ GO:0042036 \\ GO:0017148 \\ GO:1904037 \\ GO:0048024 \\	apoptotic process (GO:0006915);negative regulation of cytokine biosynthetic process (GO:0042036);negative regulation of translation (GO:0017148);positive regulation of epithelial cell apoptotic process (GO:1904037);regulation of mRNA splicing, via spliceosome (GO:0048024);	AU-rich element binding (GO:0017091);nucleotide binding (GO:0000166);poly(A) RNA binding (GO:0044822);	cytoplasm (GO:0005737);cytoplasmic stress granule (GO:0010494);nuclear stress granule (GO:0097165);nucleoplasm (GO:0005654);nucleus (GO:0005634);	3D-structure;Acetylation;Apoptosis;Complete proteome;Nucleus;Reference proteome;Repeat;RNA-binding.;		-0.717647	2.74498	0.408735	1	155	201	178	TIA1
Locus_10079_Transcript_1/10_Confidence_0.391_Length_3351	3351	Locus_10079_Transcript_1/10_Confidence_0.391_Length_3351	3351	Locus_10079_Transcript_1/10_Confidence_0.391_Length_3351	3351	Q91WG5	96.466	0	AAKG2_MOUSE	5'-AMP-activated protein kinase subunit gamma-2	No_KEGG	GO:0005829 \\ GO:0005615 \\ GO:0005654 \\ GO:0031588 \\ GO:0043531 \\ GO:0016208 \\ GO:0004679 \\ GO:0005524 \\ GO:0004862 \\ GO:0008603 \\ GO:0008607 \\ GO:0030295 \\ GO:0019901 \\ GO:0032147 \\ GO:0006633 \\ GO:0005977 \\ GO:0035556 \\ GO:0006469 \\ GO:0071901 \\ GO:0010800 \\ GO:0045860 \\ GO:0019217 \\ GO:0006110 \\	activation of protein kinase activity (GO:0032147);fatty acid biosynthetic process (GO:0006633);glycogen metabolic process (GO:0005977);intracellular signal transduction (GO:0035556);negative regulation of protein kinase activity (GO:0006469);negative regulation of protein serine/threonine kinase activity (GO:0071901);positive regulation of peptidyl-threonine phosphorylation (GO:0010800);positive…	ADP binding (GO:0043531);AMP binding (GO:0016208);AMP-activated protein kinase activity (GO:0004679);ATP binding (GO:0005524);cAMP-dependent protein kinase inhibitor activity (GO:0004862);cAMP-dependent protein kinase regulator activity (GO:0008603);phosphorylase kinase regulator activity (GO:0008607);protein kinase activator activity (GO:0030295);protein kinase binding (GO:0019901);	cytosol (GO:0005829);extracellular space (GO:0005615);nucleoplasm (GO:0005654);nucleotide-activated protein kinase complex (GO:0031588);	Alternative splicing;ATP-binding;CBS domain;Complete proteome;Fatty acid biosynthesis;Fatty acid metabolism;Lipid biosynthesis;Lipid metabolism;Nucleotide-binding;Phosphoprotein;Reference proteome;Repeat.;		0.81589	1.58008	0.370086	1	114	51	82.5	AAKG2
Locus_10079_Transcript_10/10_Confidence_0.565_Length_4013	4013	Locus_10079_Transcript_10/10_Confidence_0.565_Length_4013	4013	Locus_10079_Transcript_10/10_Confidence_0.565_Length_4013	4013	Q9UGJ0	86.355	0	AAKG2_HUMAN	5'-AMP-activated protein kinase subunit gamma-2	hsa:51422	GO:0005829 \\ GO:0005615 \\ GO:0005654 \\ GO:0031588 \\ GO:0043531 \\ GO:0016208 \\ GO:0004679 \\ GO:0005524 \\ GO:0004862 \\ GO:0008603 \\ GO:0008607 \\ GO:0030295 \\ GO:0019901 \\ GO:0032147 \\ GO:0006754 \\ GO:0006853 \\ GO:0007050 \\ GO:0044255 \\ GO:0006112 \\ GO:0006633 \\ GO:0010467 \\ GO:0005977 \\ GO:0008286 \\ GO:0035556 \\ GO:0016236 \\ GO:0061024 \\ GO:0007005 \\ GO:0006469 \\ GO:0071…	activation of protein kinase activity (GO:0032147);ATP biosynthetic process (GO:0006754);carnitine shuttle (GO:0006853);cell cycle arrest (GO:0007050);cellular lipid metabolic process (GO:0044255);energy reserve metabolic process (GO:0006112);fatty acid biosynthetic process (GO:0006633);gene expression (GO:0010467);glycogen metabolic process (GO:0005977);insulin receptor signaling pathway (GO:000…	ADP binding (GO:0043531);AMP binding (GO:0016208);AMP-activated protein kinase activity (GO:0004679);ATP binding (GO:0005524);cAMP-dependent protein kinase inhibitor activity (GO:0004862);cAMP-dependent protein kinase regulator activity (GO:0008603);phosphorylase kinase regulator activity (GO:0008607);protein kinase activator activity (GO:0030295);protein kinase binding (GO:0019901);	cytosol (GO:0005829);extracellular space (GO:0005615);nucleoplasm (GO:0005654);nucleotide-activated protein kinase complex (GO:0031588);	Alternative splicing;ATP-binding;Cardiomyopathy;CBS domain;Complete proteome;Disease mutation;Fatty acid biosynthesis;Fatty acid metabolism;Glycogen storage disease;Lipid biosynthesis;Lipid metabolism;Nucleotide-binding;Phosphoprotein;Polymorphism;Reference proteome;Repeat.;		1.1102	1.95283	0.205321	1	159	58	108.5	AAKG2
Locus_10079_Transcript_5/10_Confidence_0.565_Length_4108	4108	Locus_10079_Transcript_5/10_Confidence_0.565_Length_4108	4108	Locus_10079_Transcript_5/10_Confidence_0.565_Length_4108	4108	Q91WG5	94.318	5.5e-165	AAKG2_MOUSE	5'-AMP-activated protein kinase subunit gamma-2	No_KEGG	GO:0005829 \\ GO:0005615 \\ GO:0005654 \\ GO:0031588 \\ GO:0043531 \\ GO:0016208 \\ GO:0004679 \\ GO:0005524 \\ GO:0004862 \\ GO:0008603 \\ GO:0008607 \\ GO:0030295 \\ GO:0019901 \\ GO:0032147 \\ GO:0006633 \\ GO:0005977 \\ GO:0035556 \\ GO:0006469 \\ GO:0071901 \\ GO:0010800 \\ GO:0045860 \\ GO:0019217 \\ GO:0006110 \\	activation of protein kinase activity (GO:0032147);fatty acid biosynthetic process (GO:0006633);glycogen metabolic process (GO:0005977);intracellular signal transduction (GO:0035556);negative regulation of protein kinase activity (GO:0006469);negative regulation of protein serine/threonine kinase activity (GO:0071901);positive regulation of peptidyl-threonine phosphorylation (GO:0010800);positive…	ADP binding (GO:0043531);AMP binding (GO:0016208);AMP-activated protein kinase activity (GO:0004679);ATP binding (GO:0005524);cAMP-dependent protein kinase inhibitor activity (GO:0004862);cAMP-dependent protein kinase regulator activity (GO:0008603);phosphorylase kinase regulator activity (GO:0008607);protein kinase activator activity (GO:0030295);protein kinase binding (GO:0019901);	cytosol (GO:0005829);extracellular space (GO:0005615);nucleoplasm (GO:0005654);nucleotide-activated protein kinase complex (GO:0031588);	Alternative splicing;ATP-binding;CBS domain;Complete proteome;Fatty acid biosynthesis;Fatty acid metabolism;Lipid biosynthesis;Lipid metabolism;Nucleotide-binding;Phosphoprotein;Reference proteome;Repeat.;		0.875183	2.06291	0.317674	1	163	70	116.5	AAKG2
Locus_10079_Transcript_6/10_Confidence_0.478_Length_2338	2338	Locus_10079_Transcript_6/10_Confidence_0.478_Length_2338	2338	Locus_10079_Transcript_6/10_Confidence_0.478_Length_2338	2338	Q9UGJ0	86.355	0	AAKG2_HUMAN	5'-AMP-activated protein kinase subunit gamma-2	hsa:51422	GO:0005829 \\ GO:0005615 \\ GO:0005654 \\ GO:0031588 \\ GO:0043531 \\ GO:0016208 \\ GO:0004679 \\ GO:0005524 \\ GO:0004862 \\ GO:0008603 \\ GO:0008607 \\ GO:0030295 \\ GO:0019901 \\ GO:0032147 \\ GO:0006754 \\ GO:0006853 \\ GO:0007050 \\ GO:0044255 \\ GO:0006112 \\ GO:0006633 \\ GO:0010467 \\ GO:0005977 \\ GO:0008286 \\ GO:0035556 \\ GO:0016236 \\ GO:0061024 \\ GO:0007005 \\ GO:0006469 \\ GO:0071…	activation of protein kinase activity (GO:0032147);ATP biosynthetic process (GO:0006754);carnitine shuttle (GO:0006853);cell cycle arrest (GO:0007050);cellular lipid metabolic process (GO:0044255);energy reserve metabolic process (GO:0006112);fatty acid biosynthetic process (GO:0006633);gene expression (GO:0010467);glycogen metabolic process (GO:0005977);insulin receptor signaling pathway (GO:000…	ADP binding (GO:0043531);AMP binding (GO:0016208);AMP-activated protein kinase activity (GO:0004679);ATP binding (GO:0005524);cAMP-dependent protein kinase inhibitor activity (GO:0004862);cAMP-dependent protein kinase regulator activity (GO:0008603);phosphorylase kinase regulator activity (GO:0008607);protein kinase activator activity (GO:0030295);protein kinase binding (GO:0019901);	cytosol (GO:0005829);extracellular space (GO:0005615);nucleoplasm (GO:0005654);nucleotide-activated protein kinase complex (GO:0031588);	Alternative splicing;ATP-binding;Cardiomyopathy;CBS domain;Complete proteome;Disease mutation;Fatty acid biosynthesis;Fatty acid metabolism;Glycogen storage disease;Lipid biosynthesis;Lipid metabolism;Nucleotide-binding;Phosphoprotein;Polymorphism;Reference proteome;Repeat.;		1.2156	0.679902	0.197281	1	65	22	43.5	AAKG2
Locus_10079_Transcript_7/10_Confidence_0.174_Length_2504	2504	No_sig_nr_hit	No_sig_nr_hit	No_sig_nr_hit	No_sig_nr_hit	No_Uniprotmatch	No_%_identity	No_evalue	No_ID	No_Description	No_KEGG	No_GO	No_GOCC	No_GOBP	No_GOMF	No_keywords		1.02376	1.22872	0.26227	1	93	36	64.5	No
Locus_10079_Transcript_9/10_Confidence_0.478_Length_4041	4041	Locus_10079_Transcript_9/10_Confidence_0.478_Length_4041	4041	Locus_10079_Transcript_9/10_Confidence_0.478_Length_4041	4041	Q9UGJ0	87.407	0	AAKG2_HUMAN	5'-AMP-activated protein kinase subunit gamma-2	hsa:51422	GO:0005829 \\ GO:0005615 \\ GO:0005654 \\ GO:0031588 \\ GO:0043531 \\ GO:0016208 \\ GO:0004679 \\ GO:0005524 \\ GO:0004862 \\ GO:0008603 \\ GO:0008607 \\ GO:0030295 \\ GO:0019901 \\ GO:0032147 \\ GO:0006754 \\ GO:0006853 \\ GO:0007050 \\ GO:0044255 \\ GO:0006112 \\ GO:0006633 \\ GO:0010467 \\ GO:0005977 \\ GO:0008286 \\ GO:0035556 \\ GO:0016236 \\ GO:0061024 \\ GO:0007005 \\ GO:0006469 \\ GO:0071…	activation of protein kinase activity (GO:0032147);ATP biosynthetic process (GO:0006754);carnitine shuttle (GO:0006853);cell cycle arrest (GO:0007050);cellular lipid metabolic process (GO:0044255);energy reserve metabolic process (GO:0006112);fatty acid biosynthetic process (GO:0006633);gene expression (GO:0010467);glycogen metabolic process (GO:0005977);insulin receptor signaling pathway (GO:000…	ADP binding (GO:0043531);AMP binding (GO:0016208);AMP-activated protein kinase activity (GO:0004679);ATP binding (GO:0005524);cAMP-dependent protein kinase inhibitor activity (GO:0004862);cAMP-dependent protein kinase regulator activity (GO:0008603);phosphorylase kinase regulator activity (GO:0008607);protein kinase activator activity (GO:0030295);protein kinase binding (GO:0019901);	cytosol (GO:0005829);extracellular space (GO:0005615);nucleoplasm (GO:0005654);nucleotide-activated protein kinase complex (GO:0031588);	Alternative splicing;ATP-binding;Cardiomyopathy;CBS domain;Complete proteome;Disease mutation;Fatty acid biosynthesis;Fatty acid metabolism;Glycogen storage disease;Lipid biosynthesis;Lipid metabolism;Nucleotide-binding;Phosphoprotein;Polymorphism;Reference proteome;Repeat.;		1.04314	1.95554	0.236891	1	157	60	108.5	AAKG2
Locus_10080_Transcript_4/5_Confidence_0.667_Length_3118	3118	Locus_10080_Transcript_4/5_Confidence_0.667_Length_3118	3118	Locus_10080_Transcript_4/5_Confidence_0.667_Length_3118	3118	Q6EE22	86.079	0	UNK_CANLF	RING finger protein unkempt homolog	cfa:444855	GO:0005737 \\ GO:0003723 \\ GO:0008270 \\ GO:0048667 \\ GO:0006417 \\	cell morphogenesis involved in neuron differentiation (GO:0048667);regulation of translation (GO:0006417);	RNA binding (GO:0003723);zinc ion binding (GO:0008270);	cytoplasm (GO:0005737);	Coiled coil;Complete proteome;Cytoplasm;Metal-binding;Phosphoprotein;Reference proteome;Repeat;Repressor;RNA-binding;Translation regulation;Zinc;Zinc-finger.;		-0.172045	-0.5322	0.930594	1	18	16	17	UNK
Locus_10083_Transcript_1/5_Confidence_0.538_Length_1435	1435	No_sig_nr_hit	No_sig_nr_hit	No_sig_nr_hit	No_sig_nr_hit	No_Uniprotmatch	No_%_identity	No_evalue	No_ID	No_Description	No_KEGG	No_GO	No_GOCC	No_GOBP	No_GOMF	No_keywords		-0.120261	0.026629	0.952298	1	28	24	26	No
Locus_10083_Transcript_2/5_Confidence_0.538_Length_981	981	No_sig_nr_hit	No_sig_nr_hit	No_sig_nr_hit	No_sig_nr_hit	No_Uniprotmatch	No_%_identity	No_evalue	No_ID	No_Description	No_KEGG	No_GO	No_GOCC	No_GOBP	No_GOMF	No_keywords		-0.161402	-0.610622	0.926884	1	17	15	16	No
Locus_10085_Transcript_1/2_Confidence_0.800_Length_2537	2537	Locus_10085_Transcript_1/2_Confidence_0.800_Length_2537	2537	Locus_10085_Transcript_1/2_Confidence_0.800_Length_2537	2537	Q8BQ89	88.104	5.03e-166	LIX1L_MOUSE	LIX1-like protein	mmu:280411	GO:0005737 \\ GO:0097352 \\	autophagosome maturation (GO:0097352);	No_GOMF	cytoplasm (GO:0005737);	Complete proteome;Reference proteome.;		0.515013	3.31966	0.545068	1	359	198	278.5	LIX1L
Locus_10085_Transcript_2/2_Confidence_0.800_Length_2483	2483	Locus_10085_Transcript_2/2_Confidence_0.800_Length_2483	2483	Locus_10085_Transcript_2/2_Confidence_0.800_Length_2483	2483	Q8BQ89	94.422	1.85e-171	LIX1L_MOUSE	LIX1-like protein	mmu:280411	GO:0005737 \\ GO:0097352 \\	autophagosome maturation (GO:0097352);	No_GOMF	cytoplasm (GO:0005737);	Complete proteome;Reference proteome.;		0.28689	3.40435	0.737857	1	356	230	293	LIX1L
Locus_10087_Transcript_2/6_Confidence_0.688_Length_3608	3608	No_sig_nr_hit	No_sig_nr_hit	No_sig_nr_hit	No_sig_nr_hit	No_Uniprotmatch	No_%_identity	No_evalue	No_ID	No_Description	No_KEGG	No_GO	No_GOCC	No_GOBP	No_GOMF	No_keywords		-0.367123	5.85344	0.661084	1	1555	1581	1568	No
Locus_10089_Transcript_1/3_Confidence_0.714_Length_4903	4903	Locus_10089_Transcript_1/3_Confidence_0.714_Length_4903	4903	Locus_10089_Transcript_1/3_Confidence_0.714_Length_4903	4903	Q9Y2C2	93.333	0	UST_HUMAN	Uronyl 2-sulfotransferase	hsa:10090	GO:0000139 \\ GO:0016021 \\ GO:0008146 \\ GO:0005975 \\ GO:0030204 \\ GO:0030208 \\ GO:0030203 \\ GO:0006477 \\ GO:0044281 \\	carbohydrate metabolic process (GO:0005975);chondroitin sulfate metabolic process (GO:0030204);dermatan sulfate biosynthetic process (GO:0030208);glycosaminoglycan metabolic process (GO:0030203);protein sulfation (GO:0006477);small molecule metabolic process (GO:0044281);	sulfotransferase activity (GO:0008146);	Golgi membrane (GO:0000139);integral component of membrane (GO:0016021);	Complete proteome;Glycoprotein;Golgi apparatus;Membrane;Polymorphism;Reference proteome;Signal-anchor;Transferase;Transmembrane;Transmembrane helix.;		-0.904611	3.1465	0.292197	1	189	279	234	UST
Locus_1009_Transcript_2/7_Confidence_0.562_Length_2240	2240	Locus_1009_Transcript_2/7_Confidence_0.562_Length_2240	2240	Locus_1009_Transcript_2/7_Confidence_0.562_Length_2240	2240	P09102	94.664	0	PDIA1_CHICK	Protein disulfide-isomerase	No_KEGG	GO:0005783 \\ GO:0005788 \\ GO:0005886 \\ GO:0003756 \\ GO:0045454 \\ GO:0019511 \\ GO:0006457 \\ GO:1902175 \\ GO:0034976 \\	cell redox homeostasis (GO:0045454);peptidyl-proline hydroxylation (GO:0019511);protein folding (GO:0006457);regulation of oxidative stress-induced intrinsic apoptotic signaling pathway (GO:1902175);response to endoplasmic reticulum stress (GO:0034976);	protein disulfide isomerase activity (GO:0003756);	endoplasmic reticulum (GO:0005783);endoplasmic reticulum lumen (GO:0005788);plasma membrane (GO:0005886);	Cell membrane;Chaperone;Complete proteome;Direct protein sequencing;Disulfide bond;Endoplasmic reticulum;Isomerase;Membrane;Redox-active center;Reference proteome;Repeat;Signal.;		-0.194584	7.41456	0.81568	1	4903	4423	4663	PDIA1
Locus_1009_Transcript_3/7_Confidence_0.562_Length_2455	2455	Locus_1009_Transcript_3/7_Confidence_0.562_Length_2455	2455	Locus_1009_Transcript_3/7_Confidence_0.562_Length_2455	2455	P09102	96.875	2.45e-124	PDIA1_CHICK	Protein disulfide-isomerase	No_KEGG	GO:0005783 \\ GO:0005788 \\ GO:0005886 \\ GO:0003756 \\ GO:0045454 \\ GO:0019511 \\ GO:0006457 \\ GO:1902175 \\ GO:0034976 \\	cell redox homeostasis (GO:0045454);peptidyl-proline hydroxylation (GO:0019511);protein folding (GO:0006457);regulation of oxidative stress-induced intrinsic apoptotic signaling pathway (GO:1902175);response to endoplasmic reticulum stress (GO:0034976);	protein disulfide isomerase activity (GO:0003756);	endoplasmic reticulum (GO:0005783);endoplasmic reticulum lumen (GO:0005788);plasma membrane (GO:0005886);	Cell membrane;Chaperone;Complete proteome;Direct protein sequencing;Disulfide bond;Endoplasmic reticulum;Isomerase;Membrane;Redox-active center;Reference proteome;Repeat;Signal.;		-0.141769	7.49947	0.865174	1	5302	4611	4956.5	PDIA1
Locus_1009_Transcript_4/7_Confidence_0.375_Length_1036	1036	No_sig_nr_hit	No_sig_nr_hit	No_sig_nr_hit	No_sig_nr_hit	No_Uniprotmatch	No_%_identity	No_evalue	No_ID	No_Description	No_KEGG	No_GO	No_GOCC	No_GOBP	No_GOMF	No_keywords		0.162644	6.50511	0.845912	1	2955	2081	2518	No
Locus_1009_Transcript_5/7_Confidence_0.250_Length_1231	1231	No_sig_nr_hit	No_sig_nr_hit	No_sig_nr_hit	No_sig_nr_hit	No_Uniprotmatch	No_%_identity	No_evalue	No_ID	No_Description	No_KEGG	No_GO	No_GOCC	No_GOBP	No_GOMF	No_keywords		0.192132	6.27601	0.818477	1	2545	1756	2150.5	No
Locus_1009_Transcript_6/7_Confidence_0.250_Length_1756	1756	Locus_1009_Transcript_6/7_Confidence_0.250_Length_1756	1756	Locus_1009_Transcript_6/7_Confidence_0.250_Length_1756	1756	P09102	92.739	2.46e-165	PDIA1_CHICK	Protein disulfide-isomerase	No_KEGG	GO:0005783 \\ GO:0005788 \\ GO:0005886 \\ GO:0003756 \\ GO:0045454 \\ GO:0019511 \\ GO:0006457 \\ GO:1902175 \\ GO:0034976 \\	cell redox homeostasis (GO:0045454);peptidyl-proline hydroxylation (GO:0019511);protein folding (GO:0006457);regulation of oxidative stress-induced intrinsic apoptotic signaling pathway (GO:1902175);response to endoplasmic reticulum stress (GO:0034976);	protein disulfide isomerase activity (GO:0003756);	endoplasmic reticulum (GO:0005783);endoplasmic reticulum lumen (GO:0005788);plasma membrane (GO:0005886);	Cell membrane;Chaperone;Complete proteome;Direct protein sequencing;Disulfide bond;Endoplasmic reticulum;Isomerase;Membrane;Redox-active center;Reference proteome;Repeat;Signal.;		-0.808728	5.65656	0.336152	1	1129	1559	1344	PDIA1
Locus_1009_Transcript_7/7_Confidence_0.562_Length_2216	2216	Locus_1009_Transcript_7/7_Confidence_0.562_Length_2216	2216	Locus_1009_Transcript_7/7_Confidence_0.562_Length_2216	2216	P09102	94.575	0	PDIA1_CHICK	Protein disulfide-isomerase	No_KEGG	GO:0005783 \\ GO:0005788 \\ GO:0005886 \\ GO:0003756 \\ GO:0045454 \\ GO:0019511 \\ GO:0006457 \\ GO:1902175 \\ GO:0034976 \\	cell redox homeostasis (GO:0045454);peptidyl-proline hydroxylation (GO:0019511);protein folding (GO:0006457);regulation of oxidative stress-induced intrinsic apoptotic signaling pathway (GO:1902175);response to endoplasmic reticulum stress (GO:0034976);	protein disulfide isomerase activity (GO:0003756);	endoplasmic reticulum (GO:0005783);endoplasmic reticulum lumen (GO:0005788);plasma membrane (GO:0005886);	Cell membrane;Chaperone;Complete proteome;Direct protein sequencing;Disulfide bond;Endoplasmic reticulum;Isomerase;Membrane;Redox-active center;Reference proteome;Repeat;Signal.;		-0.173095	7.50915	0.835722	1	5277	4690	4983.5	PDIA1
Locus_10091_Transcript_1/1_Confidence_1.000_Length_2386	2386	Locus_10091_Transcript_1/1_Confidence_1.000_Length_2386	2386	Locus_10091_Transcript_1/1_Confidence_1.000_Length_2386	2386	A0A093BM48	67.647	9.86e-11	A0A093BM48_CHAPE	Zinc finger CCCH domain-containing protein 11A {ECO:0000313|EMBL:KFU85683.1}	No_KEGG	GO:0046872 \\	No_GOBP	metal ion binding (GO:0046872);	No_GOCC	Coiled coil {ECO:0000256|SAM:Coils};Complete proteome {ECO:0000313|Proteomes:UP000031515};Metal-binding {ECO:0000256|SAAS:SAAS00522393};Reference proteome {ECO:0000313|Proteomes:UP000031515}.;		0.845296	1.2246	0.352757	1	89	39	64	A0A093BM48
Locus_100911_Transcript_1/1_Confidence_1.000_Length_531	531	Locus_100911_Transcript_1/1_Confidence_1.000_Length_531	531	Locus_100911_Transcript_1/1_Confidence_1.000_Length_531	531	A0A078A2G4	76.596	3.47e-25	A0A078A2G4_STYLE	Uncharacterized protein {ECO:0000313|EMBL:CDW75723.1}	No_KEGG	No_GOcodes	No_GOBP	No_GOMF	No_GOCC	Complete proteome {ECO:0000313|Proteomes:UP000039865};Reference proteome {ECO:0000313|Proteomes:UP000039865}.;		0.595999	4.42189	0.479684	1	792	413	602.5	A0A078A2G4
Locus_10093_Transcript_2/6_Confidence_0.667_Length_3094	3094	Locus_10093_Transcript_2/6_Confidence_0.667_Length_3094	3094	Locus_10093_Transcript_2/6_Confidence_0.667_Length_3094	3094	P13913	91.724	0	ARY1_CHICK	Arylamine N-acetyltransferase, pineal gland isozyme NAT-10	gga:396283	GO:0004060 \\	No_GOBP	arylamine N-acetyltransferase activity (GO:0004060);	No_GOCC	Acyltransferase;Complete proteome;Reference proteome;Transferase.;		0.832891	2.42243	0.338401	1	208	92	150	ARY1
Locus_10093_Transcript_3/6_Confidence_0.333_Length_477	477	No_sig_nr_hit	No_sig_nr_hit	No_sig_nr_hit	No_sig_nr_hit	No_Uniprotmatch	No_%_identity	No_evalue	No_ID	No_Description	No_KEGG	No_GO	No_GOCC	No_GOBP	No_GOMF	No_keywords		0.24021	-0.33185	0.877112	1	24	16	20	No
Locus_10094_Transcript_2/3_Confidence_0.571_Length_1959	1959	Locus_10094_Transcript_2/3_Confidence_0.571_Length_1959	1959	Locus_10094_Transcript_2/3_Confidence_0.571_Length_1959	1959	Q9NQG1	66.216	6.53e-28	MANBL_HUMAN	Protein MANBAL	hsa:63905	GO:0016021 \\	No_GOBP	No_GOMF	integral component of membrane (GO:0016021);	Complete proteome;Membrane;Reference proteome;Transmembrane;Transmembrane helix.;		-0.116175	0.948141	0.923352	1	55	47	51	MANBL
Locus_10094_Transcript_3/3_Confidence_0.714_Length_2080	2080	Locus_10094_Transcript_3/3_Confidence_0.714_Length_2080	2080	Locus_10094_Transcript_3/3_Confidence_0.714_Length_2080	2080	Q9NQG1	66.216	8.03e-28	MANBL_HUMAN	Protein MANBAL	hsa:63905	GO:0016021 \\	No_GOBP	No_GOMF	integral component of membrane (GO:0016021);	Complete proteome;Membrane;Reference proteome;Transmembrane;Transmembrane helix.;		0.0665442	1.59602	0.950692	1	93	70	81.5	MANBL
Locus_10096_Transcript_5/5_Confidence_0.600_Length_3438	3438	Locus_10096_Transcript_5/5_Confidence_0.600_Length_3438	3438	Locus_10096_Transcript_5/5_Confidence_0.600_Length_3438	3438	P09917	81.818	0	LOX5_HUMAN	Arachidonate 5-lipoxygenase	hsa:240	GO:0005829 \\ GO:0030425 \\ GO:0005615 \\ GO:0005635 \\ GO:0005641 \\ GO:0016363 \\ GO:0031965 \\ GO:0042383 \\ GO:0004051 \\ GO:0005506 \\ GO:0002526 \\ GO:0019369 \\ GO:0019370 \\ GO:0006691 \\ GO:0002540 \\ GO:2001300 \\ GO:0019372 \\ GO:0045907 \\ GO:0055093 \\ GO:0007584 \\ GO:0019233 \\ GO:0044281 \\	acute inflammatory response (GO:0002526);arachidonic acid metabolic process (GO:0019369);leukotriene biosynthetic process (GO:0019370);leukotriene metabolic process (GO:0006691);leukotriene production involved in inflammatory response (GO:0002540);lipoxin metabolic process (GO:2001300);lipoxygenase pathway (GO:0019372);positive regulation of vasoconstriction (GO:0045907);response to hyperoxia (GO…	arachidonate 5-lipoxygenase activity (GO:0004051);iron ion binding (GO:0005506);	cytosol (GO:0005829);dendrite (GO:0030425);extracellular space (GO:0005615);nuclear envelope (GO:0005635);nuclear envelope lumen (GO:0005641);nuclear matrix (GO:0016363);nuclear membrane (GO:0031965);sarcolemma (GO:0042383);	3D-structure;Alternative splicing;Calcium;Complete proteome;Cytoplasm;Dioxygenase;Direct protein sequencing;Iron;Leukotriene biosynthesis;Membrane;Metal-binding;Nucleus;Oxidoreductase;Phosphoprotein;Polymorphism;Reference proteome.;		-0.540551	2.04303	0.530075	1	102	117	109.5	LOX5
Locus_100962_Transcript_1/1_Confidence_1.000_Length_273	273	No_sig_nr_hit	No_sig_nr_hit	No_sig_nr_hit	No_sig_nr_hit	No_Uniprotmatch	No_%_identity	No_evalue	No_ID	No_Description	No_KEGG	No_GO	No_GOCC	No_GOBP	No_GOMF	No_keywords		0.912373	-0.558653	0.401817	1	24	10	17	No
Locus_100967_Transcript_1/1_Confidence_1.000_Length_220	220	No_sig_nr_hit	No_sig_nr_hit	No_sig_nr_hit	No_sig_nr_hit	No_Uniprotmatch	No_%_identity	No_evalue	No_ID	No_Description	No_KEGG	No_GO	No_GOCC	No_GOBP	No_GOMF	No_keywords		-0.149345	-0.693525	0.92275	1	16	14	15	No
Locus_10099_Transcript_1/6_Confidence_0.688_Length_9034	9034	Locus_10099_Transcript_1/6_Confidence_0.688_Length_9034	9034	Locus_10099_Transcript_1/6_Confidence_0.688_Length_9034	9034	Q9JIL5	78.116	0	TULP4_MOUSE	Tubby-related protein 4	No_KEGG	GO:0005929 \\ GO:0005737 \\ GO:0035091 \\ GO:0035556 \\ GO:0061512 \\ GO:0016567 \\	intracellular signal transduction (GO:0035556);protein localization to cilium (GO:0061512);protein ubiquitination (GO:0016567);	phosphatidylinositol binding (GO:0035091);	cilium (GO:0005929);cytoplasm (GO:0005737);	Complete proteome;Cytoplasm;Reference proteome;Repeat;Ubl conjugation pathway;WD repeat.;		-0.510651	0.013135	0.624512	1	24	27	25.5	TULP4
Locus_10099_Transcript_3/6_Confidence_0.688_Length_9413	9413	Locus_10099_Transcript_3/6_Confidence_0.688_Length_9413	9413	Locus_10099_Transcript_3/6_Confidence_0.688_Length_9413	9413	Q9JIL5	78.116	0	TULP4_MOUSE	Tubby-related protein 4	No_KEGG	GO:0005929 \\ GO:0005737 \\ GO:0035091 \\ GO:0035556 \\ GO:0061512 \\ GO:0016567 \\	intracellular signal transduction (GO:0035556);protein localization to cilium (GO:0061512);protein ubiquitination (GO:0016567);	phosphatidylinositol binding (GO:0035091);	cilium (GO:0005929);cytoplasm (GO:0005737);	Complete proteome;Cytoplasm;Reference proteome;Repeat;Ubl conjugation pathway;WD repeat.;		0.0128582	0.145715	1	1	32	25	28.5	TULP4
Locus_101_Transcript_10/10_Confidence_0.208_Length_2429	2429	Locus_101_Transcript_10/10_Confidence_0.208_Length_2429	2429	Locus_101_Transcript_10/10_Confidence_0.208_Length_2429	2429	Q96GR4	57.692	1.35e-47	ZDH12_HUMAN	Probable palmitoyltransferase ZDHHC12	hsa:84885	GO:0005783 \\ GO:0005794 \\ GO:0016021 \\ GO:0016409 \\ GO:0019706 \\ GO:0008270 \\ GO:0018345 \\	protein palmitoylation (GO:0018345);	palmitoyltransferase activity (GO:0016409);protein-cysteine S-palmitoyltransferase activity (GO:0019706);zinc ion binding (GO:0008270);	endoplasmic reticulum (GO:0005783);Golgi apparatus (GO:0005794);integral component of membrane (GO:0016021);	Acyltransferase;Alternative splicing;Complete proteome;Membrane;Metal-binding;Polymorphism;Reference proteome;Transferase;Transmembrane;Transmembrane helix;Zinc;Zinc-finger.;		1.07782	0.159126	0.275851	1	43	16	29.5	ZDH12
Locus_101_Transcript_7/10_Confidence_0.375_Length_5186	5186	Locus_101_Transcript_7/10_Confidence_0.375_Length_5186	5186	Locus_101_Transcript_7/10_Confidence_0.375_Length_5186	5186	Q7Z7L7	89.687	0	ZER1_HUMAN	Protein zer-1 homolog	hsa:10444	GO:0031462 \\ GO:0004842 \\ GO:0016567 \\ GO:0051438 \\	protein ubiquitination (GO:0016567);regulation of ubiquitin-protein transferase activity (GO:0051438);	ubiquitin-protein transferase activity (GO:0004842);	Cul2-RING ubiquitin ligase complex (GO:0031462);	Acetylation;Complete proteome;Leucine-rich repeat;Polymorphism;Reference proteome;Repeat;Ubl conjugation pathway.;		-0.156659	2.20058	0.859221	1	132	116	124	ZER1
Locus_101_Transcript_8/10_Confidence_0.292_Length_7796	7796	Locus_101_Transcript_8/10_Confidence_0.292_Length_7796	7796	Locus_101_Transcript_8/10_Confidence_0.292_Length_7796	7796	Q7Z7L7	89.687	0	ZER1_HUMAN	Protein zer-1 homolog	hsa:10444	GO:0031462 \\ GO:0004842 \\ GO:0016567 \\ GO:0051438 \\	protein ubiquitination (GO:0016567);regulation of ubiquitin-protein transferase activity (GO:0051438);	ubiquitin-protein transferase activity (GO:0004842);	Cul2-RING ubiquitin ligase complex (GO:0031462);	Acetylation;Complete proteome;Leucine-rich repeat;Polymorphism;Reference proteome;Repeat;Ubl conjugation pathway.;		-0.116162	3.98683	0.895406	1	467	399	433	ZER1
Locus_101_Transcript_9/10_Confidence_0.292_Length_7773	7773	Locus_101_Transcript_9/10_Confidence_0.292_Length_7773	7773	Locus_101_Transcript_9/10_Confidence_0.292_Length_7773	7773	Q7Z7L7	89.687	0	ZER1_HUMAN	Protein zer-1 homolog	hsa:10444	GO:0031462 \\ GO:0004842 \\ GO:0016567 \\ GO:0051438 \\	protein ubiquitination (GO:0016567);regulation of ubiquitin-protein transferase activity (GO:0051438);	ubiquitin-protein transferase activity (GO:0004842);	Cul2-RING ubiquitin ligase complex (GO:0031462);	Acetylation;Complete proteome;Leucine-rich repeat;Polymorphism;Reference proteome;Repeat;Ubl conjugation pathway.;		-0.188454	4.03985	0.823713	1	472	424	448	ZER1
Locus_1010_Transcript_1/3_Confidence_0.714_Length_5298	5298	Locus_1010_Transcript_1/3_Confidence_0.714_Length_5298	5298	Locus_1010_Transcript_1/3_Confidence_0.714_Length_5298	5298	D2H526	78.741	0	CDK12_AILME	Cyclin-dependent kinase 12	No_KEGG	GO:0002944 \\ GO:0019908 \\ GO:0016607 \\ GO:0005730 \\ GO:0005524 \\ GO:0004693 \\ GO:0008353 \\ GO:0006397 \\ GO:0070816 \\ GO:0046777 \\ GO:0043405 \\ GO:0008380 \\	mRNA processing (GO:0006397);phosphorylation of RNA polymerase II C-terminal domain (GO:0070816);protein autophosphorylation (GO:0046777);regulation of MAP kinase activity (GO:0043405);RNA splicing (GO:0008380);	ATP binding (GO:0005524);cyclin-dependent protein serine/threonine kinase activity (GO:0004693);RNA polymerase II carboxy-terminal domain kinase activity (GO:0008353);	cyclin K-CDK12 complex (GO:0002944);nuclear cyclin-dependent protein kinase holoenzyme complex (GO:0019908);nuclear speck (GO:0016607);nucleolus (GO:0005730);	ATP-binding;Complete proteome;Kinase;mRNA processing;mRNA splicing;Nucleotide-binding;Nucleus;Phosphoprotein;Reference proteome;Serine/threonine-protein kinase;Transferase.;		0.236158	3.97864	0.781674	1	523	350	436.5	CDK12
Locus_1010_Transcript_2/3_Confidence_0.714_Length_5325	5325	Locus_1010_Transcript_2/3_Confidence_0.714_Length_5325	5325	Locus_1010_Transcript_2/3_Confidence_0.714_Length_5325	5325	D2H526	78.954	0	CDK12_AILME	Cyclin-dependent kinase 12	No_KEGG	GO:0002944 \\ GO:0019908 \\ GO:0016607 \\ GO:0005730 \\ GO:0005524 \\ GO:0004693 \\ GO:0008353 \\ GO:0006397 \\ GO:0070816 \\ GO:0046777 \\ GO:0043405 \\ GO:0008380 \\	mRNA processing (GO:0006397);phosphorylation of RNA polymerase II C-terminal domain (GO:0070816);protein autophosphorylation (GO:0046777);regulation of MAP kinase activity (GO:0043405);RNA splicing (GO:0008380);	ATP binding (GO:0005524);cyclin-dependent protein serine/threonine kinase activity (GO:0004693);RNA polymerase II carboxy-terminal domain kinase activity (GO:0008353);	cyclin K-CDK12 complex (GO:0002944);nuclear cyclin-dependent protein kinase holoenzyme complex (GO:0019908);nuclear speck (GO:0016607);nucleolus (GO:0005730);	ATP-binding;Complete proteome;Kinase;mRNA processing;mRNA splicing;Nucleotide-binding;Nucleus;Phosphoprotein;Reference proteome;Serine/threonine-protein kinase;Transferase.;		0.296969	3.90106	0.728016	1	505	324	414.5	CDK12
Locus_10100_Transcript_2/3_Confidence_0.714_Length_8395	8395	Locus_10100_Transcript_2/3_Confidence_0.714_Length_8395	8395	Locus_10100_Transcript_2/3_Confidence_0.714_Length_8395	8395	Q86X10	91.639	0	RLGPB_HUMAN	Ral GTPase-activating protein subunit beta	hsa:57148	GO:0005622 \\ GO:0005096 \\ GO:0046982 \\ GO:0090630 \\ GO:0061024 \\ GO:0032484 \\ GO:0060178 \\ GO:0051056 \\	activation of GTPase activity (GO:0090630);membrane organization (GO:0061024);Ral protein signal transduction (GO:0032484);regulation of exocyst localization (GO:0060178);regulation of small GTPase mediated signal transduction (GO:0051056);	GTPase activator activity (GO:0005096);protein heterodimerization activity (GO:0046982);	intracellular (GO:0005622);	Alternative splicing;Complete proteome;GTPase activation;Phosphoprotein;Reference proteome.;		0.269808	4.43256	0.749221	1	725	474	599.5	RLGPB
Locus_10102_Transcript_1/1_Confidence_1.000_Length_2327	2327	No_sig_nr_hit	No_sig_nr_hit	No_sig_nr_hit	No_sig_nr_hit	No_Uniprotmatch	No_%_identity	No_evalue	No_ID	No_Description	No_KEGG	No_GO	No_GOCC	No_GOBP	No_GOMF	No_keywords		-1.76901	2.64534	0.0443382	1	87	234	160.5	No
Locus_101067_Transcript_1/1_Confidence_1.000_Length_579	579	No_sig_nr_hit	No_sig_nr_hit	No_sig_nr_hit	No_sig_nr_hit	No_Uniprotmatch	No_%_identity	No_evalue	No_ID	No_Description	No_KEGG	No_GO	No_GOCC	No_GOBP	No_GOMF	No_keywords		0.00464765	-0.926713	1	1	14	11	12.5	No
Locus_10107_Transcript_1/5_Confidence_0.500_Length_7325	7325	Locus_10107_Transcript_1/5_Confidence_0.500_Length_7325	7325	Locus_10107_Transcript_1/5_Confidence_0.500_Length_7325	7325	Q9EQG6	82.562	0	KDIS_RAT	Kinase D-interacting substrate of 220 kDa	rno:116478	GO:0005829 \\ GO:0016021 \\ GO:0005770 \\ GO:0043234 \\ GO:0030165 \\ GO:0019901 \\ GO:0019887 \\ GO:1990090 \\ GO:0016482 \\ GO:0038180 \\ GO:0010976 \\ GO:0045859 \\	cellular response to nerve growth factor stimulus (GO:1990090);cytoplasmic transport (GO:0016482);nerve growth factor signaling pathway (GO:0038180);positive regulation of neuron projection development (GO:0010976);regulation of protein kinase activity (GO:0045859);	PDZ domain binding (GO:0030165);protein kinase binding (GO:0019901);protein kinase regulator activity (GO:0019887);	cytosol (GO:0005829);integral component of membrane (GO:0016021);late endosome (GO:0005770);protein complex (GO:0043234);	Alternative splicing;ANK repeat;Complete proteome;Endosome;Membrane;Neurogenesis;Phosphoprotein;Reference proteome;Repeat;Transmembrane;Transmembrane helix.;		0.341902	4.04496	0.687016	1	566	352	459	KDIS
Locus_10107_Transcript_2/5_Confidence_0.583_Length_7493	7493	Locus_10107_Transcript_2/5_Confidence_0.583_Length_7493	7493	Locus_10107_Transcript_2/5_Confidence_0.583_Length_7493	7493	Q9ULH0	85.434	0	KDIS_HUMAN	Kinase D-interacting substrate of 220 kDa	hsa:57498	GO:0005829 \\ GO:0016021 \\ GO:0005770 \\ GO:0016020 \\ GO:0043234 \\ GO:0030165 \\ GO:0019887 \\ GO:0000186 \\ GO:1990090 \\ GO:0016482 \\ GO:0048813 \\ GO:0001701 \\ GO:0038180 \\ GO:0048011 \\ GO:0010976 \\ GO:0045859 \\	activation of MAPKK activity (GO:0000186);cellular response to nerve growth factor stimulus (GO:1990090);cytoplasmic transport (GO:0016482);dendrite morphogenesis (GO:0048813);in utero embryonic development (GO:0001701);nerve growth factor signaling pathway (GO:0038180);neurotrophin TRK receptor signaling pathway (GO:0048011);positive regulation of neuron projection development (GO:0010976);regul…	PDZ domain binding (GO:0030165);protein kinase regulator activity (GO:0019887);	cytosol (GO:0005829);integral component of membrane (GO:0016021);late endosome (GO:0005770);membrane (GO:0016020);protein complex (GO:0043234);	Alternative splicing;ANK repeat;Complete proteome;Endosome;Membrane;Neurogenesis;Phosphoprotein;Polymorphism;Reference proteome;Repeat;Transmembrane;Transmembrane helix.;		0.390521	4.1478	0.644161	1	617	371	494	KDIS
Locus_10107_Transcript_3/5_Confidence_0.667_Length_7436	7436	Locus_10107_Transcript_3/5_Confidence_0.667_Length_7436	7436	Locus_10107_Transcript_3/5_Confidence_0.667_Length_7436	7436	Q9ULH0	84.719	0	KDIS_HUMAN	Kinase D-interacting substrate of 220 kDa	hsa:57498	GO:0005829 \\ GO:0016021 \\ GO:0005770 \\ GO:0016020 \\ GO:0043234 \\ GO:0030165 \\ GO:0019887 \\ GO:0000186 \\ GO:1990090 \\ GO:0016482 \\ GO:0048813 \\ GO:0001701 \\ GO:0038180 \\ GO:0048011 \\ GO:0010976 \\ GO:0045859 \\	activation of MAPKK activity (GO:0000186);cellular response to nerve growth factor stimulus (GO:1990090);cytoplasmic transport (GO:0016482);dendrite morphogenesis (GO:0048813);in utero embryonic development (GO:0001701);nerve growth factor signaling pathway (GO:0038180);neurotrophin TRK receptor signaling pathway (GO:0048011);positive regulation of neuron projection development (GO:0010976);regul…	PDZ domain binding (GO:0030165);protein kinase regulator activity (GO:0019887);	cytosol (GO:0005829);integral component of membrane (GO:0016021);late endosome (GO:0005770);membrane (GO:0016020);protein complex (GO:0043234);	Alternative splicing;ANK repeat;Complete proteome;Endosome;Membrane;Neurogenesis;Phosphoprotein;Polymorphism;Reference proteome;Repeat;Transmembrane;Transmembrane helix.;		-0.0631054	4.17899	0.941641	1	544	448	496	KDIS
Locus_10108_Transcript_1/5_Confidence_0.636_Length_1286	1286	Locus_10108_Transcript_1/5_Confidence_0.636_Length_1286	1286	Locus_10108_Transcript_1/5_Confidence_0.636_Length_1286	1286	A0A093EQR5	35.542	4.1e-12	A0A093EQR5_TAUER	Uncharacterized protein {ECO:0000313|EMBL:KFV16886.1}	No_KEGG	GO:0003723 \\ GO:0003964 \\	No_GOBP	RNA binding (GO:0003723);RNA-directed DNA polymerase activity (GO:0003964);	No_GOCC	Complete proteome {ECO:0000313|Proteomes:UP000053661}.;		1.67929	0.0750085	0.106464	1	45	11	28	A0A093EQR5
Locus_10109_Transcript_1/3_Confidence_0.667_Length_1018	1018	Locus_10109_Transcript_1/3_Confidence_0.667_Length_1018	1018	Locus_10109_Transcript_1/3_Confidence_0.667_Length_1018	1018	No_Uniprotmatch	No_%_identity	No_evalue	No_ID	No_Description	No_KEGG	No_GO	No_GOCC	No_GOBP	No_GOMF	No_keywords		-0.077779	3.60559	0.929733	1	363	302	332.5	No
Locus_10109_Transcript_2/3_Confidence_0.667_Length_970	970	Locus_10109_Transcript_2/3_Confidence_0.667_Length_970	970	Locus_10109_Transcript_2/3_Confidence_0.667_Length_970	970	Q99N94	76.786	1.11e-22	RM09_MOUSE	39S ribosomal protein L9, mitochondrial	mmu:78523	GO:0005739 \\ GO:0005840 \\ GO:0044822 \\ GO:0003735 \\ GO:0006412 \\	translation (GO:0006412);	poly(A) RNA binding (GO:0044822);structural constituent of ribosome (GO:0003735);	mitochondrion (GO:0005739);ribosome (GO:0005840);	Complete proteome;Mitochondrion;Reference proteome;Ribonucleoprotein;Ribosomal protein;Transit peptide.;		0.34916	3.98225	0.679197	1	543	336	439.5	RM09
Locus_10109_Transcript_3/3_Confidence_0.667_Length_1010	1010	Locus_10109_Transcript_3/3_Confidence_0.667_Length_1010	1010	Locus_10109_Transcript_3/3_Confidence_0.667_Length_1010	1010	Q99N94	76.786	1.24e-22	RM09_MOUSE	39S ribosomal protein L9, mitochondrial	mmu:78523	GO:0005739 \\ GO:0005840 \\ GO:0044822 \\ GO:0003735 \\ GO:0006412 \\	translation (GO:0006412);	poly(A) RNA binding (GO:0044822);structural constituent of ribosome (GO:0003735);	mitochondrion (GO:0005739);ribosome (GO:0005840);	Complete proteome;Mitochondrion;Reference proteome;Ribonucleoprotein;Ribosomal protein;Transit peptide.;		-0.326181	3.9736	0.70171	1	428	423	425.5	RM09
Locus_1011_Transcript_2/6_Confidence_0.643_Length_2398	2398	Locus_1011_Transcript_2/6_Confidence_0.643_Length_2398	2398	Locus_1011_Transcript_2/6_Confidence_0.643_Length_2398	2398	Q9JJN0	49.217	2.73e-153	POLH_MOUSE	DNA polymerase eta	mmu:80905	GO:0005737 \\ GO:0005654 \\ GO:0003684 \\ GO:0003887 \\ GO:0046872 \\ GO:0071494 \\ GO:0006260 \\ GO:0000731 \\ GO:0006301 \\ GO:0006290 \\ GO:0010225 \\	cellular response to UV-C (GO:0071494);DNA replication (GO:0006260);DNA synthesis involved in DNA repair (GO:0000731);postreplication repair (GO:0006301);pyrimidine dimer repair (GO:0006290);response to UV-C (GO:0010225);	damaged DNA binding (GO:0003684);DNA-directed DNA polymerase activity (GO:0003887);metal ion binding (GO:0046872);	cytoplasm (GO:0005737);nucleoplasm (GO:0005654);	Complete proteome;DNA damage;DNA repair;DNA replication;DNA synthesis;DNA-binding;DNA-directed DNA polymerase;Isopeptide bond;Magnesium;Metal-binding;Mutator protein;Nucleotidyltransferase;Nucleus;Reference proteome;Schiff base;Transferase;Ubl conjugation.;		0.997498	-0.384004	0.321353	1	28	11	19.5	POLH
Locus_1011_Transcript_3/6_Confidence_0.643_Length_2318	2318	Locus_1011_Transcript_3/6_Confidence_0.643_Length_2318	2318	Locus_1011_Transcript_3/6_Confidence_0.643_Length_2318	2318	Q9Y253	61.155	0	POLH_HUMAN	DNA polymerase eta	No_KEGG	GO:0005737 \\ GO:0005654 \\ GO:0003684 \\ GO:0003887 \\ GO:0046872 \\ GO:0071494 \\ GO:0006281 \\ GO:0006260 \\ GO:0000731 \\ GO:0070987 \\ GO:0006290 \\ GO:0006282 \\ GO:0010225 \\ GO:0019985 \\	cellular response to UV-C (GO:0071494);DNA repair (GO:0006281);DNA replication (GO:0006260);DNA synthesis involved in DNA repair (GO:0000731);error-free translesion synthesis (GO:0070987);pyrimidine dimer repair (GO:0006290);regulation of DNA repair (GO:0006282);response to UV-C (GO:0010225);translesion synthesis (GO:0019985);	damaged DNA binding (GO:0003684);DNA-directed DNA polymerase activity (GO:0003887);metal ion binding (GO:0046872);	cytoplasm (GO:0005737);nucleoplasm (GO:0005654);	3D-structure;Alternative splicing;Complete proteome;Direct protein sequencing;Disease mutation;DNA damage;DNA repair;DNA replication;DNA synthesis;DNA-binding;DNA-directed DNA polymerase;Isopeptide bond;Magnesium;Metal-binding;Mutator protein;Nucleotidyltransferase;Nucleus;Polymorphism;Reference proteome;Schiff base;Transferase;Ubl conjugation;Xeroderma pigmentosum.;		0.571423	0.00508569	0.574489	1	34	18	26	POLH
Locus_1011_Transcript_4/6_Confidence_0.500_Length_1883	1883	Locus_1011_Transcript_4/6_Confidence_0.500_Length_1883	1883	Locus_1011_Transcript_4/6_Confidence_0.500_Length_1883	1883	Q9JJN0	49.19	6.54e-118	POLH_MOUSE	DNA polymerase eta	mmu:80905	GO:0005737 \\ GO:0005654 \\ GO:0003684 \\ GO:0003887 \\ GO:0046872 \\ GO:0071494 \\ GO:0006260 \\ GO:0000731 \\ GO:0006301 \\ GO:0006290 \\ GO:0010225 \\	cellular response to UV-C (GO:0071494);DNA replication (GO:0006260);DNA synthesis involved in DNA repair (GO:0000731);postreplication repair (GO:0006301);pyrimidine dimer repair (GO:0006290);response to UV-C (GO:0010225);	damaged DNA binding (GO:0003684);DNA-directed DNA polymerase activity (GO:0003887);metal ion binding (GO:0046872);	cytoplasm (GO:0005737);nucleoplasm (GO:0005654);	Complete proteome;DNA damage;DNA repair;DNA replication;DNA synthesis;DNA-binding;DNA-directed DNA polymerase;Isopeptide bond;Magnesium;Metal-binding;Mutator protein;Nucleotidyltransferase;Nucleus;Reference proteome;Schiff base;Transferase;Ubl conjugation.;		0.332662	-0.367415	0.812306	1	24	15	19.5	POLH
Locus_10110_Transcript_2/3_Confidence_0.400_Length_2380	2380	Locus_10110_Transcript_2/3_Confidence_0.400_Length_2380	2380	Locus_10110_Transcript_2/3_Confidence_0.400_Length_2380	2380	Q9NYI0	48.033	0	PSD3_HUMAN	PH and SEC7 domain-containing protein 3	hsa:23362	GO:0030054 \\ GO:0014069 \\ GO:0045211 \\ GO:0005086 \\ GO:0032012 \\	regulation of ARF protein signal transduction (GO:0032012);	ARF guanyl-nucleotide exchange factor activity (GO:0005086);	cell junction (GO:0030054);postsynaptic density (GO:0014069);postsynaptic membrane (GO:0045211);	Alternative splicing;Cell junction;Cell membrane;Coiled coil;Complete proteome;Guanine-nucleotide releasing factor;Membrane;Phosphoprotein;Polymorphism;Postsynaptic cell membrane;Reference proteome;Synapse.;		-0.815548	1.30665	0.37188	1	54	75	64.5	PSD3
Locus_10110_Transcript_3/3_Confidence_0.600_Length_12630	12630	Locus_10110_Transcript_3/3_Confidence_0.600_Length_12630	12630	Locus_10110_Transcript_3/3_Confidence_0.600_Length_12630	12630	Q9NYI0	59.679	0	PSD3_HUMAN	PH and SEC7 domain-containing protein 3	hsa:23362	GO:0030054 \\ GO:0014069 \\ GO:0045211 \\ GO:0005086 \\ GO:0032012 \\	regulation of ARF protein signal transduction (GO:0032012);	ARF guanyl-nucleotide exchange factor activity (GO:0005086);	cell junction (GO:0030054);postsynaptic density (GO:0014069);postsynaptic membrane (GO:0045211);	Alternative splicing;Cell junction;Cell membrane;Coiled coil;Complete proteome;Guanine-nucleotide releasing factor;Membrane;Phosphoprotein;Polymorphism;Postsynaptic cell membrane;Reference proteome;Synapse.;		-0.561004	5.6171	0.503551	1	1221	1420	1320.5	PSD3
Locus_10111_Transcript_1/10_Confidence_0.643_Length_3477	3477	Locus_10111_Transcript_1/10_Confidence_0.643_Length_3477	3477	Locus_10111_Transcript_1/10_Confidence_0.643_Length_3477	3477	Q15431	43.327	7.29e-172	SYCP1_HUMAN	Synaptonemal complex protein 1	hsa:6847	GO:0000801 \\ GO:0001673 \\ GO:0000795 \\ GO:0000802 \\ GO:0003677 \\ GO:0051301 \\ GO:0051026 \\ GO:0051878 \\ GO:0000711 \\ GO:0007131 \\ GO:0032880 \\ GO:0035092 \\ GO:0007283 \\ GO:0007129 \\ GO:0007130 \\	cell division (GO:0051301);chiasma assembly (GO:0051026);lateral element assembly (GO:0051878);meiotic DNA repair synthesis (GO:0000711);reciprocal meiotic recombination (GO:0007131);regulation of protein localization (GO:0032880);sperm chromatin condensation (GO:0035092);spermatogenesis (GO:0007283);synapsis (GO:0007129);synaptonemal complex assembly (GO:0007130);	DNA binding (GO:0003677);	central element (GO:0000801);male germ cell nucleus (GO:0001673);synaptonemal complex (GO:0000795);transverse filament (GO:0000802);	Cell cycle;Cell division;Centromere;Chromosome;Coiled coil;Complete proteome;DNA-binding;Isopeptide bond;Meiosis;Nucleus;Polymorphism;Reference proteome;Ubl conjugation.;		0.914837	-0.0303926	0.36882	1	36	15	25.5	SYCP1
Locus_10111_Transcript_10/10_Confidence_0.643_Length_3455	3455	Locus_10111_Transcript_10/10_Confidence_0.643_Length_3455	3455	Locus_10111_Transcript_10/10_Confidence_0.643_Length_3455	3455	Q15431	43.478	0	SYCP1_HUMAN	Synaptonemal complex protein 1	hsa:6847	GO:0000801 \\ GO:0001673 \\ GO:0000795 \\ GO:0000802 \\ GO:0003677 \\ GO:0051301 \\ GO:0051026 \\ GO:0051878 \\ GO:0000711 \\ GO:0007131 \\ GO:0032880 \\ GO:0035092 \\ GO:0007283 \\ GO:0007129 \\ GO:0007130 \\	cell division (GO:0051301);chiasma assembly (GO:0051026);lateral element assembly (GO:0051878);meiotic DNA repair synthesis (GO:0000711);reciprocal meiotic recombination (GO:0007131);regulation of protein localization (GO:0032880);sperm chromatin condensation (GO:0035092);spermatogenesis (GO:0007283);synapsis (GO:0007129);synaptonemal complex assembly (GO:0007130);	DNA binding (GO:0003677);	central element (GO:0000801);male germ cell nucleus (GO:0001673);synaptonemal complex (GO:0000795);transverse filament (GO:0000802);	Cell cycle;Cell division;Centromere;Chromosome;Coiled coil;Complete proteome;DNA-binding;Isopeptide bond;Meiosis;Nucleus;Polymorphism;Reference proteome;Ubl conjugation.;		1.06628	0.0658178	0.277947	1	40	15	27.5	SYCP1
Locus_10111_Transcript_2/10_Confidence_0.619_Length_4050	4050	Locus_10111_Transcript_2/10_Confidence_0.619_Length_4050	4050	Locus_10111_Transcript_2/10_Confidence_0.619_Length_4050	4050	Q15431	43.473	4.94e-159	SYCP1_HUMAN	Synaptonemal complex protein 1	hsa:6847	GO:0000801 \\ GO:0001673 \\ GO:0000795 \\ GO:0000802 \\ GO:0003677 \\ GO:0051301 \\ GO:0051026 \\ GO:0051878 \\ GO:0000711 \\ GO:0007131 \\ GO:0032880 \\ GO:0035092 \\ GO:0007283 \\ GO:0007129 \\ GO:0007130 \\	cell division (GO:0051301);chiasma assembly (GO:0051026);lateral element assembly (GO:0051878);meiotic DNA repair synthesis (GO:0000711);reciprocal meiotic recombination (GO:0007131);regulation of protein localization (GO:0032880);sperm chromatin condensation (GO:0035092);spermatogenesis (GO:0007283);synapsis (GO:0007129);synaptonemal complex assembly (GO:0007130);	DNA binding (GO:0003677);	central element (GO:0000801);male germ cell nucleus (GO:0001673);synaptonemal complex (GO:0000795);transverse filament (GO:0000802);	Cell cycle;Cell division;Centromere;Chromosome;Coiled coil;Complete proteome;DNA-binding;Isopeptide bond;Meiosis;Nucleus;Polymorphism;Reference proteome;Ubl conjugation.;		1.18552	0.460841	0.227759	1	55	19	37	SYCP1
Locus_10111_Transcript_5/10_Confidence_0.643_Length_3540	3540	Locus_10111_Transcript_5/10_Confidence_0.643_Length_3540	3540	Locus_10111_Transcript_5/10_Confidence_0.643_Length_3540	3540	Q15431	43.026	0	SYCP1_HUMAN	Synaptonemal complex protein 1	hsa:6847	GO:0000801 \\ GO:0001673 \\ GO:0000795 \\ GO:0000802 \\ GO:0003677 \\ GO:0051301 \\ GO:0051026 \\ GO:0051878 \\ GO:0000711 \\ GO:0007131 \\ GO:0032880 \\ GO:0035092 \\ GO:0007283 \\ GO:0007129 \\ GO:0007130 \\	cell division (GO:0051301);chiasma assembly (GO:0051026);lateral element assembly (GO:0051878);meiotic DNA repair synthesis (GO:0000711);reciprocal meiotic recombination (GO:0007131);regulation of protein localization (GO:0032880);sperm chromatin condensation (GO:0035092);spermatogenesis (GO:0007283);synapsis (GO:0007129);synaptonemal complex assembly (GO:0007130);	DNA binding (GO:0003677);	central element (GO:0000801);male germ cell nucleus (GO:0001673);synaptonemal complex (GO:0000795);transverse filament (GO:0000802);	Cell cycle;Cell division;Centromere;Chromosome;Coiled coil;Complete proteome;DNA-binding;Isopeptide bond;Meiosis;Nucleus;Polymorphism;Reference proteome;Ubl conjugation.;		1.62538	0.44904	0.090354	1	59	15	37	SYCP1
Locus_10111_Transcript_6/10_Confidence_0.619_Length_3753	3753	Locus_10111_Transcript_6/10_Confidence_0.619_Length_3753	3753	Locus_10111_Transcript_6/10_Confidence_0.619_Length_3753	3753	Q15431	42.225	2.01e-178	SYCP1_HUMAN	Synaptonemal complex protein 1	hsa:6847	GO:0000801 \\ GO:0001673 \\ GO:0000795 \\ GO:0000802 \\ GO:0003677 \\ GO:0051301 \\ GO:0051026 \\ GO:0051878 \\ GO:0000711 \\ GO:0007131 \\ GO:0032880 \\ GO:0035092 \\ GO:0007283 \\ GO:0007129 \\ GO:0007130 \\	cell division (GO:0051301);chiasma assembly (GO:0051026);lateral element assembly (GO:0051878);meiotic DNA repair synthesis (GO:0000711);reciprocal meiotic recombination (GO:0007131);regulation of protein localization (GO:0032880);sperm chromatin condensation (GO:0035092);spermatogenesis (GO:0007283);synapsis (GO:0007129);synaptonemal complex assembly (GO:0007130);	DNA binding (GO:0003677);	central element (GO:0000801);male germ cell nucleus (GO:0001673);synaptonemal complex (GO:0000795);transverse filament (GO:0000802);	Cell cycle;Cell division;Centromere;Chromosome;Coiled coil;Complete proteome;DNA-binding;Isopeptide bond;Meiosis;Nucleus;Polymorphism;Reference proteome;Ubl conjugation.;		1.47104	0.339041	0.132213	1	53	15	34	SYCP1
Locus_10111_Transcript_7/10_Confidence_0.190_Length_1849	1849	Locus_10111_Transcript_7/10_Confidence_0.190_Length_1849	1849	Locus_10111_Transcript_7/10_Confidence_0.190_Length_1849	1849	Q15431	53.543	1.83e-22	SYCP1_HUMAN	Synaptonemal complex protein 1	hsa:6847	GO:0000801 \\ GO:0001673 \\ GO:0000795 \\ GO:0000802 \\ GO:0003677 \\ GO:0051301 \\ GO:0051026 \\ GO:0051878 \\ GO:0000711 \\ GO:0007131 \\ GO:0032880 \\ GO:0035092 \\ GO:0007283 \\ GO:0007129 \\ GO:0007130 \\	cell division (GO:0051301);chiasma assembly (GO:0051026);lateral element assembly (GO:0051878);meiotic DNA repair synthesis (GO:0000711);reciprocal meiotic recombination (GO:0007131);regulation of protein localization (GO:0032880);sperm chromatin condensation (GO:0035092);spermatogenesis (GO:0007283);synapsis (GO:0007129);synaptonemal complex assembly (GO:0007130);	DNA binding (GO:0003677);	central element (GO:0000801);male germ cell nucleus (GO:0001673);synaptonemal complex (GO:0000795);transverse filament (GO:0000802);	Cell cycle;Cell division;Centromere;Chromosome;Coiled coil;Complete proteome;DNA-binding;Isopeptide bond;Meiosis;Nucleus;Polymorphism;Reference proteome;Ubl conjugation.;		0.820958	-0.379856	0.471874	1	27	12	19.5	SYCP1
Locus_10111_Transcript_9/10_Confidence_0.643_Length_3839	3839	Locus_10111_Transcript_9/10_Confidence_0.643_Length_3839	3839	Locus_10111_Transcript_9/10_Confidence_0.643_Length_3839	3839	Q15431	43.532	2.82e-164	SYCP1_HUMAN	Synaptonemal complex protein 1	hsa:6847	GO:0000801 \\ GO:0001673 \\ GO:0000795 \\ GO:0000802 \\ GO:0003677 \\ GO:0051301 \\ GO:0051026 \\ GO:0051878 \\ GO:0000711 \\ GO:0007131 \\ GO:0032880 \\ GO:0035092 \\ GO:0007283 \\ GO:0007129 \\ GO:0007130 \\	cell division (GO:0051301);chiasma assembly (GO:0051026);lateral element assembly (GO:0051878);meiotic DNA repair synthesis (GO:0000711);reciprocal meiotic recombination (GO:0007131);regulation of protein localization (GO:0032880);sperm chromatin condensation (GO:0035092);spermatogenesis (GO:0007283);synapsis (GO:0007129);synaptonemal complex assembly (GO:0007130);	DNA binding (GO:0003677);	central element (GO:0000801);male germ cell nucleus (GO:0001673);synaptonemal complex (GO:0000795);transverse filament (GO:0000802);	Cell cycle;Cell division;Centromere;Chromosome;Coiled coil;Complete proteome;DNA-binding;Isopeptide bond;Meiosis;Nucleus;Polymorphism;Reference proteome;Ubl conjugation.;		1.38829	0.526402	0.142156	1	60	18	39	SYCP1
Locus_10113_Transcript_1/3_Confidence_0.333_Length_999	999	Locus_10113_Transcript_1/3_Confidence_0.333_Length_999	999	Locus_10113_Transcript_1/3_Confidence_0.333_Length_999	999	Q0P5L5	82.018	1.13e-140	SUMF1_BOVIN	Sulfatase-modifying factor 1	bta:536435	GO:0005788 \\ GO:0046872 \\ GO:0016491 \\	No_GOBP	metal ion binding (GO:0046872);oxidoreductase activity (GO:0016491);	endoplasmic reticulum lumen (GO:0005788);	Calcium;Complete proteome;Disulfide bond;Endoplasmic reticulum;Glycoprotein;Metal-binding;Oxidoreductase;Reference proteome;Signal.;		-0.0641568	1.6278	0.967694	1	91	75	83	SUMF1
Locus_10113_Transcript_2/3_Confidence_0.667_Length_1526	1526	Locus_10113_Transcript_2/3_Confidence_0.667_Length_1526	1526	Locus_10113_Transcript_2/3_Confidence_0.667_Length_1526	1526	Q8R0F3	84.477	6.55e-176	SUMF1_MOUSE	Sulfatase-modifying factor 1	mmu:58911	GO:0005783 \\ GO:0005788 \\ GO:0046872 \\ GO:0016491 \\ GO:0042803 \\	No_GOBP	metal ion binding (GO:0046872);oxidoreductase activity (GO:0016491);protein homodimerization activity (GO:0042803);	endoplasmic reticulum (GO:0005783);endoplasmic reticulum lumen (GO:0005788);	Calcium;Complete proteome;Disulfide bond;Endoplasmic reticulum;Glycoprotein;Metal-binding;Oxidoreductase;Reference proteome;Signal.;		0.299283	3.4541	0.724877	1	370	237	303.5	SUMF1
Locus_10114_Transcript_1/1_Confidence_1.000_Length_1189	1189	Locus_10114_Transcript_1/1_Confidence_1.000_Length_1189	1189	Locus_10114_Transcript_1/1_Confidence_1.000_Length_1189	1189	Q9WUH4	71.53	5.5e-150	FHL1_RAT	Four and a half LIM domains protein 1	No_KEGG	GO:0005737 \\ GO:0008270 \\ GO:0030154 \\ GO:0007275 \\	cell differentiation (GO:0030154);multicellular organismal development (GO:0007275);	zinc ion binding (GO:0008270);	cytoplasm (GO:0005737);	Acetylation;Complete proteome;Cytoplasm;Developmental protein;Differentiation;Isopeptide bond;LIM domain;Metal-binding;Reference proteome;Repeat;Ubl conjugation;Zinc;Zinc-finger.;		-1.25302	1.71586	0.155471	1	59	111	85	FHL1
Locus_10115_Transcript_1/5_Confidence_0.636_Length_7126	7126	Locus_10115_Transcript_1/5_Confidence_0.636_Length_7126	7126	Locus_10115_Transcript_1/5_Confidence_0.636_Length_7126	7126	P97260	75.867	0	SCAP_CRIGR	Sterol regulatory element-binding protein cleavage-activating protein	cge:100689048	GO:0005783 \\ GO:0005789 \\ GO:0012507 \\ GO:0000139 \\ GO:0016021 \\ GO:0016020 \\ GO:0015485 \\ GO:0008022 \\ GO:0090110 \\ GO:0008203 \\ GO:0072600 \\ GO:0032933 \\ GO:0035105 \\	cargo loading into COPII-coated vesicle (GO:0090110);cholesterol metabolic process (GO:0008203);establishment of protein localization to Golgi (GO:0072600);SREBP signaling pathway (GO:0032933);sterol regulatory element binding protein import into nucleus (GO:0035105);	cholesterol binding (GO:0015485);protein C-terminus binding (GO:0008022);	endoplasmic reticulum (GO:0005783);endoplasmic reticulum membrane (GO:0005789);ER to Golgi transport vesicle membrane (GO:0012507);Golgi membrane (GO:0000139);integral component of membrane (GO:0016021);membrane (GO:0016020);	Cholesterol metabolism;Cytoplasmic vesicle;Endoplasmic reticulum;Glycoprotein;Golgi apparatus;Lipid metabolism;Membrane;Phosphoprotein;Repeat;Steroid metabolism;Sterol metabolism;Transmembrane;Transmembrane helix;WD repeat.;		1.06127	4.68383	0.210705	1	1067	403	735	SCAP
Locus_10115_Transcript_2/5_Confidence_0.636_Length_7073	7073	Locus_10115_Transcript_2/5_Confidence_0.636_Length_7073	7073	Locus_10115_Transcript_2/5_Confidence_0.636_Length_7073	7073	P97260	75.867	0	SCAP_CRIGR	Sterol regulatory element-binding protein cleavage-activating protein	cge:100689048	GO:0005783 \\ GO:0005789 \\ GO:0012507 \\ GO:0000139 \\ GO:0016021 \\ GO:0016020 \\ GO:0015485 \\ GO:0008022 \\ GO:0090110 \\ GO:0008203 \\ GO:0072600 \\ GO:0032933 \\ GO:0035105 \\	cargo loading into COPII-coated vesicle (GO:0090110);cholesterol metabolic process (GO:0008203);establishment of protein localization to Golgi (GO:0072600);SREBP signaling pathway (GO:0032933);sterol regulatory element binding protein import into nucleus (GO:0035105);	cholesterol binding (GO:0015485);protein C-terminus binding (GO:0008022);	endoplasmic reticulum (GO:0005783);endoplasmic reticulum membrane (GO:0005789);ER to Golgi transport vesicle membrane (GO:0012507);Golgi membrane (GO:0000139);integral component of membrane (GO:0016021);membrane (GO:0016020);	Cholesterol metabolism;Cytoplasmic vesicle;Endoplasmic reticulum;Glycoprotein;Golgi apparatus;Lipid metabolism;Membrane;Phosphoprotein;Repeat;Steroid metabolism;Sterol metabolism;Transmembrane;Transmembrane helix;WD repeat.;		0.949787	4.68928	0.26156	1	1044	426	735	SCAP
Locus_10115_Transcript_4/5_Confidence_0.182_Length_756	756	Locus_10115_Transcript_4/5_Confidence_0.182_Length_756	756	Locus_10115_Transcript_4/5_Confidence_0.182_Length_756	756	A0JPH4	84.848	2.27e-09	SCAP_XENLA	Sterol regulatory element-binding protein cleavage-activating protein	xla:443598	GO:0005789 \\ GO:0012507 \\ GO:0000139 \\ GO:0016021 \\ GO:0015485 \\ GO:0008203 \\ GO:0032933 \\	cholesterol metabolic process (GO:0008203);SREBP signaling pathway (GO:0032933);	cholesterol binding (GO:0015485);	endoplasmic reticulum membrane (GO:0005789);ER to Golgi transport vesicle membrane (GO:0012507);Golgi membrane (GO:0000139);integral component of membrane (GO:0016021);	Cholesterol metabolism;Cytoplasmic vesicle;Endoplasmic reticulum;Glycoprotein;Golgi apparatus;Lipid metabolism;Membrane;Repeat;Steroid metabolism;Sterol metabolism;Transmembrane;Transmembrane helix;WD repeat.;		1.18925	-0.261501	0.264865	1	32	11	21.5	SCAP
Locus_10117_Transcript_6/8_Confidence_0.095_Length_1170	1170	Locus_10117_Transcript_6/8_Confidence_0.095_Length_1170	1170	Locus_10117_Transcript_6/8_Confidence_0.095_Length_1170	1170	Q6DCE3	63.787	1.43e-111	ZNT9_XENLA	Zinc transporter 9	xla:447051	GO:0016021 \\ GO:0005634 \\ GO:0008324 \\ GO:0006355 \\ GO:0006351 \\ GO:0006829 \\	regulation of transcription, DNA-templated (GO:0006355);transcription, DNA-templated (GO:0006351);zinc II ion transport (GO:0006829);	cation transmembrane transporter activity (GO:0008324);	integral component of membrane (GO:0016021);nucleus (GO:0005634);	Ion transport;Membrane;Nucleus;Transcription;Transcription regulation;Transmembrane;Transmembrane helix;Transport;Zinc;Zinc transport.;		-1.72085	1.22809	0.0585957	1	33	86	59.5	ZNT9
Locus_10117_Transcript_7/8_Confidence_0.667_Length_9214	9214	Locus_10117_Transcript_7/8_Confidence_0.667_Length_9214	9214	Locus_10117_Transcript_7/8_Confidence_0.667_Length_9214	9214	Q6DCE3	80.297	0	ZNT9_XENLA	Zinc transporter 9	xla:447051	GO:0016021 \\ GO:0005634 \\ GO:0008324 \\ GO:0006355 \\ GO:0006351 \\ GO:0006829 \\	regulation of transcription, DNA-templated (GO:0006355);transcription, DNA-templated (GO:0006351);zinc II ion transport (GO:0006829);	cation transmembrane transporter activity (GO:0008324);	integral component of membrane (GO:0016021);nucleus (GO:0005634);	Ion transport;Membrane;Nucleus;Transcription;Transcription regulation;Transmembrane;Transmembrane helix;Transport;Zinc;Zinc transport.;		-0.286726	6.81492	0.731446	1	3125	3005	3065	ZNT9
Locus_10118_Transcript_2/3_Confidence_0.333_Length_1752	1752	Locus_10118_Transcript_2/3_Confidence_0.333_Length_1752	1752	Locus_10118_Transcript_2/3_Confidence_0.333_Length_1752	1752	Q8K358	92.105	4.82e-13	PIGU_MOUSE	Phosphatidylinositol glycan anchor biosynthesis class U protein	No_KEGG	GO:0042765 \\ GO:0016020 \\ GO:0005886 \\ GO:0016255 \\ GO:0006506 \\ GO:0046425 \\	attachment of GPI anchor to protein (GO:0016255);GPI anchor biosynthetic process (GO:0006506);regulation of JAK-STAT cascade (GO:0046425);	No_GOMF	GPI-anchor transamidase complex (GO:0042765);membrane (GO:0016020);plasma membrane (GO:0005886);	Complete proteome;Endoplasmic reticulum;GPI-anchor biosynthesis;Membrane;Reference proteome;Transmembrane;Transmembrane helix.;		0.613163	2.43268	0.479552	1	198	102	150	PIGU
Locus_10118_Transcript_3/3_Confidence_0.667_Length_2731	2731	Locus_10118_Transcript_3/3_Confidence_0.667_Length_2731	2731	Locus_10118_Transcript_3/3_Confidence_0.667_Length_2731	2731	Q8CHJ1	86.058	0	PIGU_RAT	Phosphatidylinositol glycan anchor biosynthesis class U protein	rno:353304	GO:0042765 \\ GO:0006506 \\	GPI anchor biosynthetic process (GO:0006506);	No_GOMF	GPI-anchor transamidase complex (GO:0042765);	Alternative splicing;Complete proteome;Endoplasmic reticulum;GPI-anchor biosynthesis;Membrane;Reference proteome;Transmembrane;Transmembrane helix.;		0.00420808	3.14592	1	1	271	213	242	PIGU
Locus_1012_Transcript_2/9_Confidence_0.690_Length_4900	4900	Locus_1012_Transcript_2/9_Confidence_0.690_Length_4900	4900	Locus_1012_Transcript_2/9_Confidence_0.690_Length_4900	4900	Q80XU3	96.078	1.22e-18	NUCKS_MOUSE	Nuclear ubiquitous casein and cyclin-dependent kinase substrate 1	mmu:98415	GO:0005737 \\ GO:0005634 \\ GO:0044822 \\ GO:0001077 \\ GO:0042593 \\ GO:0046628 \\ GO:0045944 \\ GO:0006366 \\	glucose homeostasis (GO:0042593);positive regulation of insulin receptor signaling pathway (GO:0046628);positive regulation of transcription from RNA polymerase II promoter (GO:0045944);transcription from RNA polymerase II promoter (GO:0006366);	poly(A) RNA binding (GO:0044822);transcriptional activator activity, RNA polymerase II core promoter proximal region sequence-specific binding (GO:0001077);	cytoplasm (GO:0005737);nucleus (GO:0005634);	Complete proteome;Nucleus;Phosphoprotein;Reference proteome.;		0.631912	4.44011	0.453912	1	810	412	611	NUCKS
Locus_1012_Transcript_3/9_Confidence_0.690_Length_4872	4872	Locus_1012_Transcript_3/9_Confidence_0.690_Length_4872	4872	Locus_1012_Transcript_3/9_Confidence_0.690_Length_4872	4872	Q80XU3	96.078	1.22e-18	NUCKS_MOUSE	Nuclear ubiquitous casein and cyclin-dependent kinase substrate 1	mmu:98415	GO:0005737 \\ GO:0005634 \\ GO:0044822 \\ GO:0001077 \\ GO:0042593 \\ GO:0046628 \\ GO:0045944 \\ GO:0006366 \\	glucose homeostasis (GO:0042593);positive regulation of insulin receptor signaling pathway (GO:0046628);positive regulation of transcription from RNA polymerase II promoter (GO:0045944);transcription from RNA polymerase II promoter (GO:0006366);	poly(A) RNA binding (GO:0044822);transcriptional activator activity, RNA polymerase II core promoter proximal region sequence-specific binding (GO:0001077);	cytoplasm (GO:0005737);nucleus (GO:0005634);	Complete proteome;Nucleus;Phosphoprotein;Reference proteome.;		0.594915	4.35358	0.481871	1	755	394	574.5	NUCKS
Locus_1012_Transcript_4/9_Confidence_0.069_Length_1130	1130	Locus_1012_Transcript_4/9_Confidence_0.069_Length_1130	1130	Locus_1012_Transcript_4/9_Confidence_0.069_Length_1130	1130	Q80XU3	96.078	3.4e-20	NUCKS_MOUSE	Nuclear ubiquitous casein and cyclin-dependent kinase substrate 1	mmu:98415	GO:0005737 \\ GO:0005634 \\ GO:0044822 \\ GO:0001077 \\ GO:0042593 \\ GO:0046628 \\ GO:0045944 \\ GO:0006366 \\	glucose homeostasis (GO:0042593);positive regulation of insulin receptor signaling pathway (GO:0046628);positive regulation of transcription from RNA polymerase II promoter (GO:0045944);transcription from RNA polymerase II promoter (GO:0006366);	poly(A) RNA binding (GO:0044822);transcriptional activator activity, RNA polymerase II core promoter proximal region sequence-specific binding (GO:0001077);	cytoplasm (GO:0005737);nucleus (GO:0005634);	Complete proteome;Nucleus;Phosphoprotein;Reference proteome.;		0.93354	2.59134	0.283861	1	240	99	169.5	NUCKS
Locus_1012_Transcript_5/9_Confidence_0.517_Length_4762	4762	Locus_1012_Transcript_5/9_Confidence_0.517_Length_4762	4762	Locus_1012_Transcript_5/9_Confidence_0.517_Length_4762	4762	Q80XU3	96.078	1.18e-18	NUCKS_MOUSE	Nuclear ubiquitous casein and cyclin-dependent kinase substrate 1	mmu:98415	GO:0005737 \\ GO:0005634 \\ GO:0044822 \\ GO:0001077 \\ GO:0042593 \\ GO:0046628 \\ GO:0045944 \\ GO:0006366 \\	glucose homeostasis (GO:0042593);positive regulation of insulin receptor signaling pathway (GO:0046628);positive regulation of transcription from RNA polymerase II promoter (GO:0045944);transcription from RNA polymerase II promoter (GO:0006366);	poly(A) RNA binding (GO:0044822);transcriptional activator activity, RNA polymerase II core promoter proximal region sequence-specific binding (GO:0001077);	cytoplasm (GO:0005737);nucleus (GO:0005634);	Complete proteome;Nucleus;Phosphoprotein;Reference proteome.;		0.624753	4.35325	0.458293	1	761	389	575	NUCKS
Locus_10120_Transcript_1/6_Confidence_0.125_Length_652	652	No_sig_nr_hit	No_sig_nr_hit	No_sig_nr_hit	No_sig_nr_hit	No_Uniprotmatch	No_%_identity	No_evalue	No_ID	No_Description	No_KEGG	No_GO	No_GOCC	No_GOBP	No_GOMF	No_keywords		0.0349025	-1.03042	1	1	13	10	11.5	No
Locus_10120_Transcript_2/6_Confidence_0.688_Length_3994	3994	Locus_10120_Transcript_2/6_Confidence_0.688_Length_3994	3994	Locus_10120_Transcript_2/6_Confidence_0.688_Length_3994	3994	B1AQJ2	64.353	0	UBP36_MOUSE	Ubiquitin carboxyl-terminal hydrolase 36	mmu:72344	GO:0005730 \\ GO:0005634 \\ GO:0044822 \\ GO:0004843 \\ GO:1903955 \\ GO:0016579 \\ GO:1903146 \\ GO:0006511 \\	positive regulation of protein targeting to mitochondrion (GO:1903955);protein deubiquitination (GO:0016579);regulation of mitophagy (GO:1903146);ubiquitin-dependent protein catabolic process (GO:0006511);	poly(A) RNA binding (GO:0044822);thiol-dependent ubiquitin-specific protease activity (GO:0004843);	nucleolus (GO:0005730);nucleus (GO:0005634);	Complete proteome;Hydrolase;Nucleus;Phosphoprotein;Protease;Reference proteome;Thiol protease;Ubl conjugation pathway.;		0.416877	0.245707	0.677817	1	39	23	31	UBP36
Locus_10120_Transcript_3/6_Confidence_0.688_Length_4130	4130	Locus_10120_Transcript_3/6_Confidence_0.688_Length_4130	4130	Locus_10120_Transcript_3/6_Confidence_0.688_Length_4130	4130	B1AQJ2	64.353	0	UBP36_MOUSE	Ubiquitin carboxyl-terminal hydrolase 36	mmu:72344	GO:0005730 \\ GO:0005634 \\ GO:0044822 \\ GO:0004843 \\ GO:1903955 \\ GO:0016579 \\ GO:1903146 \\ GO:0006511 \\	positive regulation of protein targeting to mitochondrion (GO:1903955);protein deubiquitination (GO:0016579);regulation of mitophagy (GO:1903146);ubiquitin-dependent protein catabolic process (GO:0006511);	poly(A) RNA binding (GO:0044822);thiol-dependent ubiquitin-specific protease activity (GO:0004843);	nucleolus (GO:0005730);nucleus (GO:0005634);	Complete proteome;Hydrolase;Nucleus;Phosphoprotein;Protease;Reference proteome;Thiol protease;Ubl conjugation pathway.;		-0.381456	0.49638	0.695779	1	36	37	36.5	UBP36
Locus_10120_Transcript_4/6_Confidence_0.688_Length_4252	4252	Locus_10120_Transcript_4/6_Confidence_0.688_Length_4252	4252	Locus_10120_Transcript_4/6_Confidence_0.688_Length_4252	4252	B1AQJ2	64.353	0	UBP36_MOUSE	Ubiquitin carboxyl-terminal hydrolase 36	mmu:72344	GO:0005730 \\ GO:0005634 \\ GO:0044822 \\ GO:0004843 \\ GO:1903955 \\ GO:0016579 \\ GO:1903146 \\ GO:0006511 \\	positive regulation of protein targeting to mitochondrion (GO:1903955);protein deubiquitination (GO:0016579);regulation of mitophagy (GO:1903146);ubiquitin-dependent protein catabolic process (GO:0006511);	poly(A) RNA binding (GO:0044822);thiol-dependent ubiquitin-specific protease activity (GO:0004843);	nucleolus (GO:0005730);nucleus (GO:0005634);	Complete proteome;Hydrolase;Nucleus;Phosphoprotein;Protease;Reference proteome;Thiol protease;Ubl conjugation pathway.;		-0.406235	0.786251	0.667104	1	44	46	45	UBP36
Locus_10120_Transcript_5/6_Confidence_0.688_Length_4498	4498	Locus_10120_Transcript_5/6_Confidence_0.688_Length_4498	4498	Locus_10120_Transcript_5/6_Confidence_0.688_Length_4498	4498	B1AQJ2	64.353	0	UBP36_MOUSE	Ubiquitin carboxyl-terminal hydrolase 36	mmu:72344	GO:0005730 \\ GO:0005634 \\ GO:0044822 \\ GO:0004843 \\ GO:1903955 \\ GO:0016579 \\ GO:1903146 \\ GO:0006511 \\	positive regulation of protein targeting to mitochondrion (GO:1903955);protein deubiquitination (GO:0016579);regulation of mitophagy (GO:1903146);ubiquitin-dependent protein catabolic process (GO:0006511);	poly(A) RNA binding (GO:0044822);thiol-dependent ubiquitin-specific protease activity (GO:0004843);	nucleolus (GO:0005730);nucleus (GO:0005634);	Complete proteome;Hydrolase;Nucleus;Phosphoprotein;Protease;Reference proteome;Thiol protease;Ubl conjugation pathway.;		-0.703577	0.634713	0.449087	1	35	45	40	UBP36
Locus_10120_Transcript_6/6_Confidence_0.688_Length_3915	3915	Locus_10120_Transcript_6/6_Confidence_0.688_Length_3915	3915	Locus_10120_Transcript_6/6_Confidence_0.688_Length_3915	3915	B1AQJ2	64.353	0	UBP36_MOUSE	Ubiquitin carboxyl-terminal hydrolase 36	mmu:72344	GO:0005730 \\ GO:0005634 \\ GO:0044822 \\ GO:0004843 \\ GO:1903955 \\ GO:0016579 \\ GO:1903146 \\ GO:0006511 \\	positive regulation of protein targeting to mitochondrion (GO:1903955);protein deubiquitination (GO:0016579);regulation of mitophagy (GO:1903146);ubiquitin-dependent protein catabolic process (GO:0006511);	poly(A) RNA binding (GO:0044822);thiol-dependent ubiquitin-specific protease activity (GO:0004843);	nucleolus (GO:0005730);nucleus (GO:0005634);	Complete proteome;Hydrolase;Nucleus;Phosphoprotein;Protease;Reference proteome;Thiol protease;Ubl conjugation pathway.;		-0.217111	0.809101	0.833598	1	48	44	46	UBP36
Locus_10122_Transcript_1/1_Confidence_1.000_Length_877	877	No_sig_nr_hit	No_sig_nr_hit	No_sig_nr_hit	No_sig_nr_hit	No_Uniprotmatch	No_%_identity	No_evalue	No_ID	No_Description	No_KEGG	No_GO	No_GOCC	No_GOBP	No_GOMF	No_keywords		-0.320807	3.57976	0.703338	1	326	321	323.5	No
Locus_10125_Transcript_1/3_Confidence_0.750_Length_4655	4655	Locus_10125_Transcript_1/3_Confidence_0.750_Length_4655	4655	Locus_10125_Transcript_1/3_Confidence_0.750_Length_4655	4655	Q99550	55.004	0	MPP9_HUMAN	M-phase phosphoprotein 9	hsa:10198	GO:0005814 \\ GO:0005813 \\ GO:0005737 \\ GO:0005794 \\ GO:0000139 \\ GO:0016020 \\ GO:0005886 \\	No_GOBP	No_GOMF	centriole (GO:0005814);centrosome (GO:0005813);cytoplasm (GO:0005737);Golgi apparatus (GO:0005794);Golgi membrane (GO:0000139);membrane (GO:0016020);plasma membrane (GO:0005886);	Alternative splicing;Coiled coil;Complete proteome;Cytoplasm;Cytoskeleton;Golgi apparatus;Membrane;Phosphoprotein;Polymorphism;Reference proteome.;		0.100164	1.14185	0.932133	1	68	50	59	MPP9
Locus_10125_Transcript_2/3_Confidence_0.500_Length_1783	1783	Locus_10125_Transcript_2/3_Confidence_0.500_Length_1783	1783	Locus_10125_Transcript_2/3_Confidence_0.500_Length_1783	1783	Q99550	66.929	2.42e-41	MPP9_HUMAN	M-phase phosphoprotein 9	hsa:10198	GO:0005814 \\ GO:0005813 \\ GO:0005737 \\ GO:0005794 \\ GO:0000139 \\ GO:0016020 \\ GO:0005886 \\	No_GOBP	No_GOMF	centriole (GO:0005814);centrosome (GO:0005813);cytoplasm (GO:0005737);Golgi apparatus (GO:0005794);Golgi membrane (GO:0000139);membrane (GO:0016020);plasma membrane (GO:0005886);	Alternative splicing;Coiled coil;Complete proteome;Cytoplasm;Cytoskeleton;Golgi apparatus;Membrane;Phosphoprotein;Polymorphism;Reference proteome.;		1.01931	-0.257539	0.337182	1	31	12	21.5	MPP9
Locus_10126_Transcript_1/1_Confidence_1.000_Length_654	654	No_sig_nr_hit	No_sig_nr_hit	No_sig_nr_hit	No_sig_nr_hit	No_Uniprotmatch	No_%_identity	No_evalue	No_ID	No_Description	No_KEGG	No_GO	No_GOCC	No_GOBP	No_GOMF	No_keywords		0.128403	0.496074	0.930093	1	43	31	37	No
Locus_10127_Transcript_1/4_Confidence_0.500_Length_2183	2183	Locus_10127_Transcript_1/4_Confidence_0.500_Length_2183	2183	Locus_10127_Transcript_1/4_Confidence_0.500_Length_2183	2183	Q17RB8	41.667	3.84e-138	LONF1_HUMAN	LON peptidase N-terminal domain and RING finger protein 1	hsa:91694	GO:0004176 \\ GO:0008270 \\	No_GOBP	ATP-dependent peptidase activity (GO:0004176);zinc ion binding (GO:0008270);	No_GOCC	Alternative splicing;Complete proteome;Metal-binding;Polymorphism;Reference proteome;Repeat;TPR repeat;Zinc;Zinc-finger.;		-0.783447	3.40028	0.356249	1	238	323	280.5	LONF1
Locus_10127_Transcript_2/4_Confidence_0.667_Length_1910	1910	Locus_10127_Transcript_2/4_Confidence_0.667_Length_1910	1910	Locus_10127_Transcript_2/4_Confidence_0.667_Length_1910	1910	Q17RB8	44.53	2e-132	LONF1_HUMAN	LON peptidase N-terminal domain and RING finger protein 1	hsa:91694	GO:0004176 \\ GO:0008270 \\	No_GOBP	ATP-dependent peptidase activity (GO:0004176);zinc ion binding (GO:0008270);	No_GOCC	Alternative splicing;Complete proteome;Metal-binding;Polymorphism;Reference proteome;Repeat;TPR repeat;Zinc;Zinc-finger.;		-0.717207	3.02864	0.403297	1	189	245	217	LONF1
Locus_10127_Transcript_3/4_Confidence_0.667_Length_2572	2572	Locus_10127_Transcript_3/4_Confidence_0.667_Length_2572	2572	Locus_10127_Transcript_3/4_Confidence_0.667_Length_2572	2572	Q496Y0	36.937	9.06e-75	LONF3_HUMAN	LON peptidase N-terminal domain and RING finger protein 3	hsa:79836	GO:0004176 \\ GO:0008270 \\	No_GOBP	ATP-dependent peptidase activity (GO:0004176);zinc ion binding (GO:0008270);	No_GOCC	Alternative splicing;Complete proteome;Metal-binding;Polymorphism;Reference proteome;Repeat;TPR repeat;Zinc;Zinc-finger.;		-0.674916	3.27174	0.427653	1	228	287	257.5	LONF3
Locus_10129_Transcript_1/1_Confidence_1.000_Length_3628	3628	Locus_10129_Transcript_1/1_Confidence_1.000_Length_3628	3628	Locus_10129_Transcript_1/1_Confidence_1.000_Length_3628	3628	Q8NEY1	85.484	8.54e-24	NAV1_HUMAN	Neuron navigator 1	hsa:89796	GO:0005737 \\ GO:0005874 \\ GO:0001578 \\ GO:0001764 \\	microtubule bundle formation (GO:0001578);neuron migration (GO:0001764);	No_GOMF	cytoplasm (GO:0005737);microtubule (GO:0005874);	Acetylation;Alternative splicing;Coiled coil;Complete proteome;Cytoplasm;Cytoskeleton;Developmental protein;Differentiation;Microtubule;Neurogenesis;Phosphoprotein;Polymorphism;Reference proteome.;		-0.35787	1.84003	0.686489	1	95	96	95.5	NAV1
Locus_10130_Transcript_1/1_Confidence_1.000_Length_3165	3165	Locus_10130_Transcript_1/1_Confidence_1.000_Length_3165	3165	Locus_10130_Transcript_1/1_Confidence_1.000_Length_3165	3165	Q66T02	65.253	0	PKHG5_MOUSE	Pleckstrin homology domain-containing family G member 5	mmu:269608	GO:0005911 \\ GO:0005737 \\ GO:0030139 \\ GO:0030027 \\ GO:0048471 \\ GO:0005886 \\ GO:0005089 \\ GO:0004871 \\ GO:0035767 \\ GO:0043542 \\ GO:0043547 \\ GO:0043123 \\ GO:0035023 \\ GO:0007165 \\	endothelial cell chemotaxis (GO:0035767);endothelial cell migration (GO:0043542);positive regulation of GTPase activity (GO:0043547);positive regulation of I-kappaB kinase/NF-kappaB signaling (GO:0043123);regulation of Rho protein signal transduction (GO:0035023);signal transduction (GO:0007165);	Rho guanyl-nucleotide exchange factor activity (GO:0005089);signal transducer activity (GO:0004871);	cell-cell junction (GO:0005911);cytoplasm (GO:0005737);endocytic vesicle (GO:0030139);lamellipodium (GO:0030027);perinuclear region of cytoplasm (GO:0048471);plasma membrane (GO:0005886);	Alternative splicing;Cell junction;Cell membrane;Cell projection;Complete proteome;Cytoplasm;Membrane;Phosphoprotein;Reference proteome.;		0.112871	0.938686	0.921909	1	59	43	51	PKHG5
Locus_10132_Transcript_2/6_Confidence_0.643_Length_6338	6338	Locus_10132_Transcript_2/6_Confidence_0.643_Length_6338	6338	Locus_10132_Transcript_2/6_Confidence_0.643_Length_6338	6338	Q98864	75.945	0	PTC1_DANRE	Protein patched homolog 1	dre:30181	GO:0016021 \\ GO:0008158 \\ GO:0043010 \\ GO:0010002 \\ GO:0048635 \\ GO:0045879 \\ GO:0001649 \\ GO:0009954 \\ GO:0031290 \\ GO:0007224 \\	camera-type eye development (GO:0043010);cardioblast differentiation (GO:0010002);negative regulation of muscle organ development (GO:0048635);negative regulation of smoothened signaling pathway (GO:0045879);osteoblast differentiation (GO:0001649);proximal/distal pattern formation (GO:0009954);retinal ganglion cell axon guidance (GO:0031290);smoothened signaling pathway (GO:0007224);	hedgehog receptor activity (GO:0008158);	integral component of membrane (GO:0016021);	Complete proteome;Glycoprotein;Membrane;Receptor;Reference proteome;Transmembrane;Transmembrane helix.;		-0.601686	-0.559711	0.589535	1	15	18	16.5	PTC1
Locus_10132_Transcript_3/6_Confidence_0.643_Length_6360	6360	Locus_10132_Transcript_3/6_Confidence_0.643_Length_6360	6360	Locus_10132_Transcript_3/6_Confidence_0.643_Length_6360	6360	Q98864	75.945	0	PTC1_DANRE	Protein patched homolog 1	dre:30181	GO:0016021 \\ GO:0008158 \\ GO:0043010 \\ GO:0010002 \\ GO:0048635 \\ GO:0045879 \\ GO:0001649 \\ GO:0009954 \\ GO:0031290 \\ GO:0007224 \\	camera-type eye development (GO:0043010);cardioblast differentiation (GO:0010002);negative regulation of muscle organ development (GO:0048635);negative regulation of smoothened signaling pathway (GO:0045879);osteoblast differentiation (GO:0001649);proximal/distal pattern formation (GO:0009954);retinal ganglion cell axon guidance (GO:0031290);smoothened signaling pathway (GO:0007224);	hedgehog receptor activity (GO:0008158);	integral component of membrane (GO:0016021);	Complete proteome;Glycoprotein;Membrane;Receptor;Reference proteome;Transmembrane;Transmembrane helix.;		-0.41112	-0.280891	0.716617	1	20	21	20.5	PTC1
Locus_10133_Transcript_1/1_Confidence_1.000_Length_3626	3626	Locus_10133_Transcript_1/1_Confidence_1.000_Length_3626	3626	Locus_10133_Transcript_1/1_Confidence_1.000_Length_3626	3626	P49585	88.587	0	PCY1A_HUMAN	Choline-phosphate cytidylyltransferase A	hsa:5130	GO:0005829 \\ GO:0005789 \\ GO:0042587 \\ GO:0004105 \\ GO:0008289 \\ GO:0006657 \\ GO:0046474 \\ GO:0006656 \\ GO:0006644 \\ GO:0044281 \\	CDP-choline pathway (GO:0006657);glycerophospholipid biosynthetic process (GO:0046474);phosphatidylcholine biosynthetic process (GO:0006656);phospholipid metabolic process (GO:0006644);small molecule metabolic process (GO:0044281);	choline-phosphate cytidylyltransferase activity (GO:0004105);lipid binding (GO:0008289);	cytosol (GO:0005829);endoplasmic reticulum membrane (GO:0005789);glycogen granule (GO:0042587);	Acetylation;Complete proteome;Cone-rod dystrophy;Cytoplasm;Disease mutation;Dwarfism;Lipid biosynthesis;Lipid metabolism;Membrane;Nucleotidyltransferase;Phospholipid biosynthesis;Phospholipid metabolism;Phosphoprotein;Reference proteome;Repeat;Transferase;Ubl conjugation.;		-0.0617948	3.7187	0.946508	1	395	325	360	PCY1A
Locus_10136_Transcript_3/5_Confidence_0.636_Length_6524	6524	Locus_10136_Transcript_3/5_Confidence_0.636_Length_6524	6524	Locus_10136_Transcript_3/5_Confidence_0.636_Length_6524	6524	Q13332	85.619	0	PTPRS_HUMAN	Receptor-type tyrosine-protein phosphatase S	hsa:5802	GO:0070062 \\ GO:0005887 \\ GO:0005001 \\ GO:0007155 \\ GO:0021549 \\ GO:0021987 \\ GO:0022038 \\ GO:0090557 \\ GO:0030198 \\ GO:0021766 \\ GO:0021510 \\	cell adhesion (GO:0007155);cerebellum development (GO:0021549);cerebral cortex development (GO:0021987);corpus callosum development (GO:0022038);establishment of endothelial intestinal barrier (GO:0090557);extracellular matrix organization (GO:0030198);hippocampus development (GO:0021766);spinal cord development (GO:0021510);	transmembrane receptor protein tyrosine phosphatase activity (GO:0005001);	extracellular exosome (GO:0070062);integral component of plasma membrane (GO:0005887);	3D-structure;Alternative splicing;Cell adhesion;Complete proteome;Disulfide bond;Glycoprotein;Hydrolase;Immunoglobulin domain;Membrane;Polymorphism;Protein phosphatase;Receptor;Reference proteome;Repeat;Signal;Transmembrane;Transmembrane helix.;		-1.6921	0.200079	0.0830409	1	16	41	28.5	PTPRS
Locus_10136_Transcript_4/5_Confidence_0.364_Length_4415	4415	Locus_10136_Transcript_4/5_Confidence_0.364_Length_4415	4415	Locus_10136_Transcript_4/5_Confidence_0.364_Length_4415	4415	Q13332	88.403	0	PTPRS_HUMAN	Receptor-type tyrosine-protein phosphatase S	hsa:5802	GO:0070062 \\ GO:0005887 \\ GO:0005001 \\ GO:0007155 \\ GO:0021549 \\ GO:0021987 \\ GO:0022038 \\ GO:0090557 \\ GO:0030198 \\ GO:0021766 \\ GO:0021510 \\	cell adhesion (GO:0007155);cerebellum development (GO:0021549);cerebral cortex development (GO:0021987);corpus callosum development (GO:0022038);establishment of endothelial intestinal barrier (GO:0090557);extracellular matrix organization (GO:0030198);hippocampus development (GO:0021766);spinal cord development (GO:0021510);	transmembrane receptor protein tyrosine phosphatase activity (GO:0005001);	extracellular exosome (GO:0070062);integral component of plasma membrane (GO:0005887);	3D-structure;Alternative splicing;Cell adhesion;Complete proteome;Disulfide bond;Glycoprotein;Hydrolase;Immunoglobulin domain;Membrane;Polymorphism;Protein phosphatase;Receptor;Reference proteome;Repeat;Signal;Transmembrane;Transmembrane helix.;		-1.1671	0.00671501	0.242091	1	18	32	25	PTPRS
Locus_10136_Transcript_5/5_Confidence_0.636_Length_6476	6476	Locus_10136_Transcript_5/5_Confidence_0.636_Length_6476	6476	Locus_10136_Transcript_5/5_Confidence_0.636_Length_6476	6476	Q13332	85.011	0	PTPRS_HUMAN	Receptor-type tyrosine-protein phosphatase S	hsa:5802	GO:0070062 \\ GO:0005887 \\ GO:0005001 \\ GO:0007155 \\ GO:0021549 \\ GO:0021987 \\ GO:0022038 \\ GO:0090557 \\ GO:0030198 \\ GO:0021766 \\ GO:0021510 \\	cell adhesion (GO:0007155);cerebellum development (GO:0021549);cerebral cortex development (GO:0021987);corpus callosum development (GO:0022038);establishment of endothelial intestinal barrier (GO:0090557);extracellular matrix organization (GO:0030198);hippocampus development (GO:0021766);spinal cord development (GO:0021510);	transmembrane receptor protein tyrosine phosphatase activity (GO:0005001);	extracellular exosome (GO:0070062);integral component of plasma membrane (GO:0005887);	3D-structure;Alternative splicing;Cell adhesion;Complete proteome;Disulfide bond;Glycoprotein;Hydrolase;Immunoglobulin domain;Membrane;Polymorphism;Protein phosphatase;Receptor;Reference proteome;Repeat;Signal;Transmembrane;Transmembrane helix.;		-1.33683	0.18992	0.172094	1	19	38	28.5	PTPRS
Locus_10137_Transcript_1/2_Confidence_0.750_Length_2871	2871	Locus_10137_Transcript_1/2_Confidence_0.750_Length_2871	2871	Locus_10137_Transcript_1/2_Confidence_0.750_Length_2871	2871	Q2NL18	69.62	8.16e-72	HEYL_BOVIN	Hairy/enhancer-of-split related with YRPW motif-like protein	bta:538609	GO:0005634 \\ GO:0003677 \\ GO:0007275 \\ GO:0007219 \\ GO:0006355 \\ GO:0006351 \\	multicellular organismal development (GO:0007275);Notch signaling pathway (GO:0007219);regulation of transcription, DNA-templated (GO:0006355);transcription, DNA-templated (GO:0006351);	DNA binding (GO:0003677);	nucleus (GO:0005634);	Alternative splicing;Complete proteome;Developmental protein;DNA-binding;Notch signaling pathway;Nucleus;Reference proteome;Repressor;Transcription;Transcription regulation.;		-1.2984	1.94905	0.138001	1	68	132	100	HEYL
Locus_101377_Transcript_1/1_Confidence_1.000_Length_775	775	No_sig_nr_hit	No_sig_nr_hit	No_sig_nr_hit	No_sig_nr_hit	No_Uniprotmatch	No_%_identity	No_evalue	No_ID	No_Description	No_KEGG	No_GO	No_GOCC	No_GOBP	No_GOMF	No_keywords		0.211887	-0.267091	0.882368	1	25	17	21	No
Locus_10138_Transcript_1/5_Confidence_0.636_Length_4149	4149	Locus_10138_Transcript_1/5_Confidence_0.636_Length_4149	4149	Locus_10138_Transcript_1/5_Confidence_0.636_Length_4149	4149	Q07890	86.787	0	SOS2_HUMAN	Son of sevenless homolog 2	hsa:6655	GO:0005829 \\ GO:0003677 \\ GO:0005089 \\ GO:0097190 \\ GO:0007411 \\ GO:0001782 \\ GO:0048011 \\ GO:0043065 \\ GO:0051057 \\ GO:2000973 \\ GO:0035023 \\ GO:0051056 \\ GO:0033081 \\ GO:0042129 \\ GO:0007264 \\	apoptotic signaling pathway (GO:0097190);axon guidance (GO:0007411);B cell homeostasis (GO:0001782);neurotrophin TRK receptor signaling pathway (GO:0048011);positive regulation of apoptotic process (GO:0043065);positive regulation of small GTPase mediated signal transduction (GO:0051057);regulation of pro-B cell differentiation (GO:2000973);regulation of Rho protein signal transduction (GO:003502…	DNA binding (GO:0003677);Rho guanyl-nucleotide exchange factor activity (GO:0005089);	cytosol (GO:0005829);	Alternative splicing;Complete proteome;Disease mutation;Guanine-nucleotide releasing factor;Polymorphism;Reference proteome.;		-0.578499	2.92228	0.497959	1	186	219	202.5	SOS2
Locus_10138_Transcript_4/5_Confidence_0.364_Length_1191	1191	Locus_10138_Transcript_4/5_Confidence_0.364_Length_1191	1191	Locus_10138_Transcript_4/5_Confidence_0.364_Length_1191	1191	Q07890	77.619	1.84e-28	SOS2_HUMAN	Son of sevenless homolog 2	hsa:6655	GO:0005829 \\ GO:0003677 \\ GO:0005089 \\ GO:0097190 \\ GO:0007411 \\ GO:0001782 \\ GO:0048011 \\ GO:0043065 \\ GO:0051057 \\ GO:2000973 \\ GO:0035023 \\ GO:0051056 \\ GO:0033081 \\ GO:0042129 \\ GO:0007264 \\	apoptotic signaling pathway (GO:0097190);axon guidance (GO:0007411);B cell homeostasis (GO:0001782);neurotrophin TRK receptor signaling pathway (GO:0048011);positive regulation of apoptotic process (GO:0043065);positive regulation of small GTPase mediated signal transduction (GO:0051057);regulation of pro-B cell differentiation (GO:2000973);regulation of Rho protein signal transduction (GO:003502…	DNA binding (GO:0003677);Rho guanyl-nucleotide exchange factor activity (GO:0005089);	cytosol (GO:0005829);	Alternative splicing;Complete proteome;Disease mutation;Guanine-nucleotide releasing factor;Polymorphism;Reference proteome.;		0.461408	-0.212919	0.669334	1	28	16	22	SOS2
Locus_10139_Transcript_1/3_Confidence_0.556_Length_1437	1437	Locus_10139_Transcript_1/3_Confidence_0.556_Length_1437	1437	Locus_10139_Transcript_1/3_Confidence_0.556_Length_1437	1437	B5X5N3	41.27	1.4e-26	SKA2_SALSA	Spindle and kinetochore-associated protein 2	No_KEGG	GO:0000940 \\ GO:0005737 \\ GO:0005876 \\ GO:0008017 \\ GO:0051301 \\ GO:0007059 \\ GO:0007067 \\ GO:0031110 \\	cell division (GO:0051301);chromosome segregation (GO:0007059);mitotic nuclear division (GO:0007067);regulation of microtubule polymerization or depolymerization (GO:0031110);	microtubule binding (GO:0008017);	condensed chromosome outer kinetochore (GO:0000940);cytoplasm (GO:0005737);spindle microtubule (GO:0005876);	Alternative splicing;Cell cycle;Cell division;Centromere;Chromosome;Cytoplasm;Cytoskeleton;Kinetochore;Microtubule;Mitosis.;		0.619941	1.71049	0.486598	1	119	61	90	SKA2
Locus_10139_Transcript_2/3_Confidence_0.667_Length_2445	2445	Locus_10139_Transcript_2/3_Confidence_0.667_Length_2445	2445	Locus_10139_Transcript_2/3_Confidence_0.667_Length_2445	2445	Q8WVK7	51.485	2.94e-24	SKA2_HUMAN	Spindle and kinetochore-associated protein 2	hsa:348235	GO:0000940 \\ GO:0005829 \\ GO:0005876 \\ GO:0008017 \\ GO:0051301 \\ GO:0007059 \\ GO:0000278 \\ GO:0007067 \\ GO:0031110 \\ GO:0007264 \\	cell division (GO:0051301);chromosome segregation (GO:0007059);mitotic cell cycle (GO:0000278);mitotic nuclear division (GO:0007067);regulation of microtubule polymerization or depolymerization (GO:0031110);small GTPase mediated signal transduction (GO:0007264);	microtubule binding (GO:0008017);	condensed chromosome outer kinetochore (GO:0000940);cytosol (GO:0005829);spindle microtubule (GO:0005876);	3D-structure;Alternative splicing;Cell cycle;Cell division;Centromere;Chromosome;Complete proteome;Cytoplasm;Cytoskeleton;Kinetochore;Microtubule;Mitosis;Phosphoprotein;Reference proteome.;		0.461255	2.11767	0.599827	1	152	87	119.5	SKA2
Locus_10139_Transcript_3/3_Confidence_0.778_Length_1258	1258	Locus_10139_Transcript_3/3_Confidence_0.778_Length_1258	1258	Locus_10139_Transcript_3/3_Confidence_0.778_Length_1258	1258	B5X5N3	42.358	2.11e-42	SKA2_SALSA	Spindle and kinetochore-associated protein 2	No_KEGG	GO:0000940 \\ GO:0005737 \\ GO:0005876 \\ GO:0008017 \\ GO:0051301 \\ GO:0007059 \\ GO:0007067 \\ GO:0031110 \\	cell division (GO:0051301);chromosome segregation (GO:0007059);mitotic nuclear division (GO:0007067);regulation of microtubule polymerization or depolymerization (GO:0031110);	microtubule binding (GO:0008017);	condensed chromosome outer kinetochore (GO:0000940);cytoplasm (GO:0005737);spindle microtubule (GO:0005876);	Alternative splicing;Cell cycle;Cell division;Centromere;Chromosome;Cytoplasm;Cytoskeleton;Kinetochore;Microtubule;Mitosis.;		0.230233	1.9724	0.798196	1	128	86	107	SKA2
Locus_1014_Transcript_1/8_Confidence_0.333_Length_1894	1894	Locus_1014_Transcript_1/8_Confidence_0.333_Length_1894	1894	Locus_1014_Transcript_1/8_Confidence_0.333_Length_1894	1894	P67829	99.429	1.43e-94	KC1A_SHEEP	Casein kinase I isoform alpha	No_KEGG	GO:0000777 \\ GO:0005737 \\ GO:0005815 \\ GO:0016607 \\ GO:0005524 \\ GO:0004672 \\ GO:0004674 \\ GO:0051301 \\ GO:0045104 \\ GO:0007067 \\ GO:0006468 \\ GO:0016055 \\	cell division (GO:0051301);intermediate filament cytoskeleton organization (GO:0045104);mitotic nuclear division (GO:0007067);protein phosphorylation (GO:0006468);Wnt signaling pathway (GO:0016055);	ATP binding (GO:0005524);protein kinase activity (GO:0004672);protein serine/threonine kinase activity (GO:0004674);	condensed chromosome kinetochore (GO:0000777);cytoplasm (GO:0005737);microtubule organizing center (GO:0005815);nuclear speck (GO:0016607);	Acetylation;ATP-binding;Cell cycle;Cell division;Centromere;Chromosome;Complete proteome;Cytoplasm;Cytoskeleton;Kinase;Kinetochore;Mitosis;Nucleotide-binding;Nucleus;Reference proteome;Serine/threonine-protein kinase;Transferase;Wnt signaling pathway.;		-0.388109	4.05435	0.644268	1	442	456	449	KC1A
Locus_1014_Transcript_2/8_Confidence_0.222_Length_1167	1167	Locus_1014_Transcript_2/8_Confidence_0.222_Length_1167	1167	Locus_1014_Transcript_2/8_Confidence_0.222_Length_1167	1167	P67963	100	6.41e-106	KC1A_XENLA	Casein kinase I isoform alpha	xla:379624	GO:0000777 \\ GO:0005737 \\ GO:0005815 \\ GO:0016607 \\ GO:0005524 \\ GO:0004674 \\ GO:0051301 \\ GO:0045104 \\ GO:0007067 \\ GO:0006468 \\ GO:0016055 \\	cell division (GO:0051301);intermediate filament cytoskeleton organization (GO:0045104);mitotic nuclear division (GO:0007067);protein phosphorylation (GO:0006468);Wnt signaling pathway (GO:0016055);	ATP binding (GO:0005524);protein serine/threonine kinase activity (GO:0004674);	condensed chromosome kinetochore (GO:0000777);cytoplasm (GO:0005737);microtubule organizing center (GO:0005815);nuclear speck (GO:0016607);	ATP-binding;Cell cycle;Cell division;Centromere;Chromosome;Cytoplasm;Cytoskeleton;Kinase;Kinetochore;Mitosis;Nucleotide-binding;Nucleus;Phosphoprotein;Serine/threonine-protein kinase;Transferase;Wnt signaling pathway.;		-1.68185	0.864329	0.0723925	1	26	66	46	KC1A
Locus_1014_Transcript_3/8_Confidence_0.222_Length_1518	1518	Locus_1014_Transcript_3/8_Confidence_0.222_Length_1518	1518	Locus_1014_Transcript_3/8_Confidence_0.222_Length_1518	1518	Q8BK63	99.346	2.37e-104	KC1A_MOUSE	Casein kinase I isoform alpha	No_KEGG	GO:0030877 \\ GO:0005813 \\ GO:0000777 \\ GO:0030529 \\ GO:0045095 \\ GO:0016020 \\ GO:0005847 \\ GO:0016607 \\ GO:0072372 \\ GO:0005524 \\ GO:0004672 \\ GO:0004674 \\ GO:0051301 \\ GO:0000902 \\ GO:0007030 \\ GO:0045104 \\ GO:0007067 \\ GO:0018105 \\ GO:0006909 \\ GO:0032436 \\ GO:0006468 \\ GO:1904424 \\ GO:0016055 \\	cell division (GO:0051301);cell morphogenesis (GO:0000902);Golgi organization (GO:0007030);intermediate filament cytoskeleton organization (GO:0045104);mitotic nuclear division (GO:0007067);peptidyl-serine phosphorylation (GO:0018105);phagocytosis (GO:0006909);positive regulation of proteasomal ubiquitin-dependent protein catabolic process (GO:0032436);protein phosphorylation (GO:0006468);regulat…	ATP binding (GO:0005524);protein kinase activity (GO:0004672);protein serine/threonine kinase activity (GO:0004674);	beta-catenin destruction complex (GO:0030877);centrosome (GO:0005813);condensed chromosome kinetochore (GO:0000777);intracellular ribonucleoprotein complex (GO:0030529);keratin filament (GO:0045095);membrane (GO:0016020);mRNA cleavage and polyadenylation specificity factor complex (GO:0005847);nuclear speck (GO:0016607);primary cilium (GO:0072372);	Acetylation;Alternative splicing;ATP-binding;Cell cycle;Cell division;Centromere;Chromosome;Complete proteome;Cytoplasm;Cytoskeleton;Kinase;Kinetochore;Mitosis;Nucleotide-binding;Nucleus;Reference proteome;Serine/threonine-protein kinase;Transferase;Wnt signaling pathway.;		-1.53453	1.00429	0.090983	1	31	71	51	KC1A
Locus_1014_Transcript_4/8_Confidence_0.333_Length_2275	2275	Locus_1014_Transcript_4/8_Confidence_0.333_Length_2275	2275	Locus_1014_Transcript_4/8_Confidence_0.333_Length_2275	2275	P67963	100	0	KC1A_XENLA	Casein kinase I isoform alpha	xla:379624	GO:0000777 \\ GO:0005737 \\ GO:0005815 \\ GO:0016607 \\ GO:0005524 \\ GO:0004674 \\ GO:0051301 \\ GO:0045104 \\ GO:0007067 \\ GO:0006468 \\ GO:0016055 \\	cell division (GO:0051301);intermediate filament cytoskeleton organization (GO:0045104);mitotic nuclear division (GO:0007067);protein phosphorylation (GO:0006468);Wnt signaling pathway (GO:0016055);	ATP binding (GO:0005524);protein serine/threonine kinase activity (GO:0004674);	condensed chromosome kinetochore (GO:0000777);cytoplasm (GO:0005737);microtubule organizing center (GO:0005815);nuclear speck (GO:0016607);	ATP-binding;Cell cycle;Cell division;Centromere;Chromosome;Cytoplasm;Cytoskeleton;Kinase;Kinetochore;Mitosis;Nucleotide-binding;Nucleus;Phosphoprotein;Serine/threonine-protein kinase;Transferase;Wnt signaling pathway.;		-1.02048	2.62979	0.238858	1	125	200	162.5	KC1A
Locus_1014_Transcript_5/8_Confidence_0.167_Length_2137	2137	Locus_1014_Transcript_5/8_Confidence_0.167_Length_2137	2137	Locus_1014_Transcript_5/8_Confidence_0.167_Length_2137	2137	Q8WXF2	65.766	7.66e-32	Q8WXF2_HUMAN	HLCDGP1 {ECO:0000313|EMBL:AAL60204.1}	No_KEGG	No_GOcodes	No_GOBP	No_GOMF	No_GOCC	No_keywords		-0.269761	3.70622	0.749277	1	363	345	354	Q8WXF2
Locus_1014_Transcript_6/8_Confidence_0.444_Length_2623	2623	Locus_1014_Transcript_6/8_Confidence_0.444_Length_2623	2623	Locus_1014_Transcript_6/8_Confidence_0.444_Length_2623	2623	P67829	92.068	0	KC1A_SHEEP	Casein kinase I isoform alpha	No_KEGG	GO:0000777 \\ GO:0005737 \\ GO:0005815 \\ GO:0016607 \\ GO:0005524 \\ GO:0004672 \\ GO:0004674 \\ GO:0051301 \\ GO:0045104 \\ GO:0007067 \\ GO:0006468 \\ GO:0016055 \\	cell division (GO:0051301);intermediate filament cytoskeleton organization (GO:0045104);mitotic nuclear division (GO:0007067);protein phosphorylation (GO:0006468);Wnt signaling pathway (GO:0016055);	ATP binding (GO:0005524);protein kinase activity (GO:0004672);protein serine/threonine kinase activity (GO:0004674);	condensed chromosome kinetochore (GO:0000777);cytoplasm (GO:0005737);microtubule organizing center (GO:0005815);nuclear speck (GO:0016607);	Acetylation;ATP-binding;Cell cycle;Cell division;Centromere;Chromosome;Complete proteome;Cytoplasm;Cytoskeleton;Kinase;Kinetochore;Mitosis;Nucleotide-binding;Nucleus;Reference proteome;Serine/threonine-protein kinase;Transferase;Wnt signaling pathway.;		-0.507766	4.26525	0.546991	1	488	547	517.5	KC1A
Locus_1014_Transcript_7/8_Confidence_0.389_Length_2575	2575	Locus_1014_Transcript_7/8_Confidence_0.389_Length_2575	2575	Locus_1014_Transcript_7/8_Confidence_0.389_Length_2575	2575	P67963	100	0	KC1A_XENLA	Casein kinase I isoform alpha	xla:379624	GO:0000777 \\ GO:0005737 \\ GO:0005815 \\ GO:0016607 \\ GO:0005524 \\ GO:0004674 \\ GO:0051301 \\ GO:0045104 \\ GO:0007067 \\ GO:0006468 \\ GO:0016055 \\	cell division (GO:0051301);intermediate filament cytoskeleton organization (GO:0045104);mitotic nuclear division (GO:0007067);protein phosphorylation (GO:0006468);Wnt signaling pathway (GO:0016055);	ATP binding (GO:0005524);protein serine/threonine kinase activity (GO:0004674);	condensed chromosome kinetochore (GO:0000777);cytoplasm (GO:0005737);microtubule organizing center (GO:0005815);nuclear speck (GO:0016607);	ATP-binding;Cell cycle;Cell division;Centromere;Chromosome;Cytoplasm;Cytoskeleton;Kinase;Kinetochore;Mitosis;Nucleotide-binding;Nucleus;Phosphoprotein;Serine/threonine-protein kinase;Transferase;Wnt signaling pathway.;		-0.690536	4.28654	0.412092	1	459	584	521.5	KC1A
Locus_1014_Transcript_8/8_Confidence_0.389_Length_2539	2539	Locus_1014_Transcript_8/8_Confidence_0.389_Length_2539	2539	Locus_1014_Transcript_8/8_Confidence_0.389_Length_2539	2539	P67829	100	0	KC1A_SHEEP	Casein kinase I isoform alpha	No_KEGG	GO:0000777 \\ GO:0005737 \\ GO:0005815 \\ GO:0016607 \\ GO:0005524 \\ GO:0004672 \\ GO:0004674 \\ GO:0051301 \\ GO:0045104 \\ GO:0007067 \\ GO:0006468 \\ GO:0016055 \\	cell division (GO:0051301);intermediate filament cytoskeleton organization (GO:0045104);mitotic nuclear division (GO:0007067);protein phosphorylation (GO:0006468);Wnt signaling pathway (GO:0016055);	ATP binding (GO:0005524);protein kinase activity (GO:0004672);protein serine/threonine kinase activity (GO:0004674);	condensed chromosome kinetochore (GO:0000777);cytoplasm (GO:0005737);microtubule organizing center (GO:0005815);nuclear speck (GO:0016607);	Acetylation;ATP-binding;Cell cycle;Cell division;Centromere;Chromosome;Complete proteome;Cytoplasm;Cytoskeleton;Kinase;Kinetochore;Mitosis;Nucleotide-binding;Nucleus;Reference proteome;Serine/threonine-protein kinase;Transferase;Wnt signaling pathway.;		-0.388577	4.23186	0.646186	1	500	516	508	KC1A
Locus_10140_Transcript_1/1_Confidence_1.000_Length_550	550	No_sig_nr_hit	No_sig_nr_hit	No_sig_nr_hit	No_sig_nr_hit	No_Uniprotmatch	No_%_identity	No_evalue	No_ID	No_Description	No_KEGG	No_GO	No_GOCC	No_GOBP	No_GOMF	No_keywords		-0.248965	2.00247	0.790566	1	111	104	107.5	No
Locus_101409_Transcript_1/1_Confidence_1.000_Length_356	356	Locus_101409_Transcript_1/1_Confidence_1.000_Length_356	356	Locus_101409_Transcript_1/1_Confidence_1.000_Length_356	356	A0A0B5JIA6	52	4.94e-14	A0A0B5JIA6_NIPNI	TAP1 {ECO:0000313|EMBL:AJG01878.1}	No_KEGG	GO:0042825 \\ GO:0005524 \\ GO:0015440 \\ GO:0019885 \\	antigen processing and presentation of endogenous peptide antigen via MHC class I (GO:0019885);	ATP binding (GO:0005524);peptide-transporting ATPase activity (GO:0015440);	TAP complex (GO:0042825);	ATP-binding {ECO:0000256|RuleBase:RU003299};Nucleotide-binding {ECO:0000256|RuleBase:RU003299};Repeat {ECO:0000256|SAAS:SAAS00451175}.;		0.210685	0.582522	0.836489	1	47	32	39.5	A0A0B5JIA6
Locus_10141_Transcript_1/1_Confidence_1.000_Length_1545	1545	No_sig_nr_hit	No_sig_nr_hit	No_sig_nr_hit	No_sig_nr_hit	No_Uniprotmatch	No_%_identity	No_evalue	No_ID	No_Description	No_KEGG	No_GO	No_GOCC	No_GOBP	No_GOMF	No_keywords		0.904787	0.413258	0.365347	1	50	21	35.5	No
Locus_10142_Transcript_3/3_Confidence_0.667_Length_2194	2194	Locus_10142_Transcript_3/3_Confidence_0.667_Length_2194	2194	Locus_10142_Transcript_3/3_Confidence_0.667_Length_2194	2194	Q7L9B9	79.218	0	EEPD1_HUMAN	Endonuclease/exonuclease/phosphatase family domain-containing protein 1	hsa:80820	GO:0003677 \\ GO:0006281 \\	DNA repair (GO:0006281);	DNA binding (GO:0003677);	No_GOCC	Complete proteome;Lipoprotein;Myristate;Phosphoprotein;Polymorphism;Reference proteome.;		0.324958	2.97624	0.705436	1	267	168	217.5	EEPD1
Locus_10144_Transcript_1/2_Confidence_0.800_Length_2543	2543	No_sig_nr_hit	No_sig_nr_hit	No_sig_nr_hit	No_sig_nr_hit	No_Uniprotmatch	No_%_identity	No_evalue	No_ID	No_Description	No_KEGG	No_GO	No_GOCC	No_GOBP	No_GOMF	No_keywords		-0.762271	4.5078	0.366554	1	519	694	606.5	No
Locus_10145_Transcript_3/7_Confidence_0.176_Length_688	688	Locus_10145_Transcript_3/7_Confidence_0.176_Length_688	688	Locus_10145_Transcript_3/7_Confidence_0.176_Length_688	688	Q5ZJ41	92.414	5.04e-92	MARH5_CHICK	E3 ubiquitin-protein ligase MARCH5	gga:423815	GO:0005783 \\ GO:0005789 \\ GO:0016021 \\ GO:0005741 \\ GO:0016874 \\ GO:0004842 \\ GO:0008270 \\ GO:0090344 \\ GO:0090141 \\ GO:0051865 \\ GO:0070585 \\ GO:0000209 \\ GO:0090140 \\	negative regulation of cell aging (GO:0090344);positive regulation of mitochondrial fission (GO:0090141);protein autoubiquitination (GO:0051865);protein localization to mitochondrion (GO:0070585);protein polyubiquitination (GO:0000209);regulation of mitochondrial fission (GO:0090140);	ligase activity (GO:0016874);ubiquitin-protein transferase activity (GO:0004842);zinc ion binding (GO:0008270);	endoplasmic reticulum (GO:0005783);endoplasmic reticulum membrane (GO:0005789);integral component of membrane (GO:0016021);mitochondrial outer membrane (GO:0005741);	Complete proteome;Endoplasmic reticulum;Ligase;Membrane;Metal-binding;Mitochondrion;Mitochondrion outer membrane;Reference proteome;Transmembrane;Transmembrane helix;Ubl conjugation pathway;Zinc;Zinc-finger.;		-1.57815	0.557081	0.0926246	1	22	52	37	MARH5
Locus_10145_Transcript_5/7_Confidence_0.647_Length_3437	3437	Locus_10145_Transcript_5/7_Confidence_0.647_Length_3437	3437	Locus_10145_Transcript_5/7_Confidence_0.647_Length_3437	3437	Q5ZJ41	99.644	0	MARH5_CHICK	E3 ubiquitin-protein ligase MARCH5	gga:423815	GO:0005783 \\ GO:0005789 \\ GO:0016021 \\ GO:0005741 \\ GO:0016874 \\ GO:0004842 \\ GO:0008270 \\ GO:0090344 \\ GO:0090141 \\ GO:0051865 \\ GO:0070585 \\ GO:0000209 \\ GO:0090140 \\	negative regulation of cell aging (GO:0090344);positive regulation of mitochondrial fission (GO:0090141);protein autoubiquitination (GO:0051865);protein localization to mitochondrion (GO:0070585);protein polyubiquitination (GO:0000209);regulation of mitochondrial fission (GO:0090140);	ligase activity (GO:0016874);ubiquitin-protein transferase activity (GO:0004842);zinc ion binding (GO:0008270);	endoplasmic reticulum (GO:0005783);endoplasmic reticulum membrane (GO:0005789);integral component of membrane (GO:0016021);mitochondrial outer membrane (GO:0005741);	Complete proteome;Endoplasmic reticulum;Ligase;Membrane;Metal-binding;Mitochondrion;Mitochondrion outer membrane;Reference proteome;Transmembrane;Transmembrane helix;Ubl conjugation pathway;Zinc;Zinc-finger.;		-0.134124	3.99612	0.877352	1	467	404	435.5	MARH5
Locus_10145_Transcript_6/7_Confidence_0.471_Length_3294	3294	Locus_10145_Transcript_6/7_Confidence_0.471_Length_3294	3294	Locus_10145_Transcript_6/7_Confidence_0.471_Length_3294	3294	Q5ZJ41	98.734	3.53e-100	MARH5_CHICK	E3 ubiquitin-protein ligase MARCH5	gga:423815	GO:0005783 \\ GO:0005789 \\ GO:0016021 \\ GO:0005741 \\ GO:0016874 \\ GO:0004842 \\ GO:0008270 \\ GO:0090344 \\ GO:0090141 \\ GO:0051865 \\ GO:0070585 \\ GO:0000209 \\ GO:0090140 \\	negative regulation of cell aging (GO:0090344);positive regulation of mitochondrial fission (GO:0090141);protein autoubiquitination (GO:0051865);protein localization to mitochondrion (GO:0070585);protein polyubiquitination (GO:0000209);regulation of mitochondrial fission (GO:0090140);	ligase activity (GO:0016874);ubiquitin-protein transferase activity (GO:0004842);zinc ion binding (GO:0008270);	endoplasmic reticulum (GO:0005783);endoplasmic reticulum membrane (GO:0005789);integral component of membrane (GO:0016021);mitochondrial outer membrane (GO:0005741);	Complete proteome;Endoplasmic reticulum;Ligase;Membrane;Metal-binding;Mitochondrion;Mitochondrion outer membrane;Reference proteome;Transmembrane;Transmembrane helix;Ubl conjugation pathway;Zinc;Zinc-finger.;		0.114341	3.95046	0.892707	1	493	359	426	MARH5
Locus_10147_Transcript_1/1_Confidence_1.000_Length_1865	1865	Locus_10147_Transcript_1/1_Confidence_1.000_Length_1865	1865	Locus_10147_Transcript_1/1_Confidence_1.000_Length_1865	1865	Q9D650	80.272	9.66e-143	FA84A_MOUSE	Protein FAM84A	mmu:105005	No_GOcodes	No_GOBP	No_GOMF	No_GOCC	Complete proteome;Reference proteome.;		0.844393	-0.16477	0.438951	1	32	14	23	FA84A
Locus_10148_Transcript_1/10_Confidence_0.400_Length_2649	2649	Locus_10148_Transcript_1/10_Confidence_0.400_Length_2649	2649	Locus_10148_Transcript_1/10_Confidence_0.400_Length_2649	2649	Q01888	86.486	4.27e-59	GDC_BOVIN	Graves disease carrier protein	bta:282524	GO:0016021 \\ GO:0005743 \\ GO:0003735 \\ GO:0006412 \\ GO:0055085 \\	translation (GO:0006412);transmembrane transport (GO:0055085);	structural constituent of ribosome (GO:0003735);	integral component of membrane (GO:0016021);mitochondrial inner membrane (GO:0005743);	Complete proteome;Membrane;Mitochondrion;Mitochondrion inner membrane;Reference proteome;Repeat;Transmembrane;Transmembrane helix;Transport.;		-0.00704157	2.55116	1	1	178	141	159.5	GDC
Locus_10148_Transcript_10/10_Confidence_0.600_Length_3001	3001	Locus_10148_Transcript_10/10_Confidence_0.600_Length_3001	3001	Locus_10148_Transcript_10/10_Confidence_0.600_Length_3001	3001	Q01888	85.714	0	GDC_BOVIN	Graves disease carrier protein	bta:282524	GO:0016021 \\ GO:0005743 \\ GO:0003735 \\ GO:0006412 \\ GO:0055085 \\	translation (GO:0006412);transmembrane transport (GO:0055085);	structural constituent of ribosome (GO:0003735);	integral component of membrane (GO:0016021);mitochondrial inner membrane (GO:0005743);	Complete proteome;Membrane;Mitochondrion;Mitochondrion inner membrane;Reference proteome;Repeat;Transmembrane;Transmembrane helix;Transport.;		-0.400695	2.89506	0.640651	1	196	204	200	GDC
Locus_10148_Transcript_2/10_Confidence_0.400_Length_2879	2879	Locus_10148_Transcript_2/10_Confidence_0.400_Length_2879	2879	Locus_10148_Transcript_2/10_Confidence_0.400_Length_2879	2879	Q01888	83.553	2.02e-128	GDC_BOVIN	Graves disease carrier protein	bta:282524	GO:0016021 \\ GO:0005743 \\ GO:0003735 \\ GO:0006412 \\ GO:0055085 \\	translation (GO:0006412);transmembrane transport (GO:0055085);	structural constituent of ribosome (GO:0003735);	integral component of membrane (GO:0016021);mitochondrial inner membrane (GO:0005743);	Complete proteome;Membrane;Mitochondrion;Mitochondrion inner membrane;Reference proteome;Repeat;Transmembrane;Transmembrane helix;Transport.;		-0.265049	2.77637	0.761911	1	190	180	185	GDC
Locus_10148_Transcript_3/10_Confidence_0.567_Length_2838	2838	Locus_10148_Transcript_3/10_Confidence_0.567_Length_2838	2838	Locus_10148_Transcript_3/10_Confidence_0.567_Length_2838	2838	Q01888	85.795	1.78e-100	GDC_BOVIN	Graves disease carrier protein	bta:282524	GO:0016021 \\ GO:0005743 \\ GO:0003735 \\ GO:0006412 \\ GO:0055085 \\	translation (GO:0006412);transmembrane transport (GO:0055085);	structural constituent of ribosome (GO:0003735);	integral component of membrane (GO:0016021);mitochondrial inner membrane (GO:0005743);	Complete proteome;Membrane;Mitochondrion;Mitochondrion inner membrane;Reference proteome;Repeat;Transmembrane;Transmembrane helix;Transport.;		-0.22759	2.69502	0.800582	1	182	168	175	GDC
Locus_10148_Transcript_4/10_Confidence_0.433_Length_933	933	Locus_10148_Transcript_4/10_Confidence_0.433_Length_933	933	Locus_10148_Transcript_4/10_Confidence_0.433_Length_933	933	Q01888	87.283	4.34e-107	GDC_BOVIN	Graves disease carrier protein	bta:282524	GO:0016021 \\ GO:0005743 \\ GO:0003735 \\ GO:0006412 \\ GO:0055085 \\	translation (GO:0006412);transmembrane transport (GO:0055085);	structural constituent of ribosome (GO:0003735);	integral component of membrane (GO:0016021);mitochondrial inner membrane (GO:0005743);	Complete proteome;Membrane;Mitochondrion;Mitochondrion inner membrane;Reference proteome;Repeat;Transmembrane;Transmembrane helix;Transport.;		-0.569037	0.77724	0.536407	1	41	48	44.5	GDC
Locus_10148_Transcript_5/10_Confidence_0.200_Length_2701	2701	Locus_10148_Transcript_5/10_Confidence_0.200_Length_2701	2701	Locus_10148_Transcript_5/10_Confidence_0.200_Length_2701	2701	Q8C0K5	85.714	7.06e-63	GDC_MOUSE	Graves disease carrier protein homolog	mmu:73132	GO:0016021 \\ GO:0005743 \\ GO:0005739 \\ GO:0003735 \\ GO:0006412 \\ GO:0055085 \\	translation (GO:0006412);transmembrane transport (GO:0055085);	structural constituent of ribosome (GO:0003735);	integral component of membrane (GO:0016021);mitochondrial inner membrane (GO:0005743);mitochondrion (GO:0005739);	Alternative splicing;Complete proteome;Membrane;Mitochondrion;Mitochondrion inner membrane;Reference proteome;Repeat;Transmembrane;Transmembrane helix;Transport.;		-0.0255928	2.46939	0.981881	1	167	134	150.5	GDC
Locus_10148_Transcript_6/10_Confidence_0.533_Length_2499	2499	Locus_10148_Transcript_6/10_Confidence_0.533_Length_2499	2499	Locus_10148_Transcript_6/10_Confidence_0.533_Length_2499	2499	Q01888	86.344	1.33e-136	GDC_BOVIN	Graves disease carrier protein	bta:282524	GO:0016021 \\ GO:0005743 \\ GO:0003735 \\ GO:0006412 \\ GO:0055085 \\	translation (GO:0006412);transmembrane transport (GO:0055085);	structural constituent of ribosome (GO:0003735);	integral component of membrane (GO:0016021);mitochondrial inner membrane (GO:0005743);	Complete proteome;Membrane;Mitochondrion;Mitochondrion inner membrane;Reference proteome;Repeat;Transmembrane;Transmembrane helix;Transport.;		-0.588021	1.53716	0.51507	1	70	83	76.5	GDC
Locus_10148_Transcript_7/10_Confidence_0.067_Length_2781	2781	Locus_10148_Transcript_7/10_Confidence_0.067_Length_2781	2781	Locus_10148_Transcript_7/10_Confidence_0.067_Length_2781	2781	Q8C0K5	88.235	6.15e-21	GDC_MOUSE	Graves disease carrier protein homolog	mmu:73132	GO:0016021 \\ GO:0005743 \\ GO:0005739 \\ GO:0003735 \\ GO:0006412 \\ GO:0055085 \\	translation (GO:0006412);transmembrane transport (GO:0055085);	structural constituent of ribosome (GO:0003735);	integral component of membrane (GO:0016021);mitochondrial inner membrane (GO:0005743);mitochondrion (GO:0005739);	Alternative splicing;Complete proteome;Membrane;Mitochondrion;Mitochondrion inner membrane;Reference proteome;Repeat;Transmembrane;Transmembrane helix;Transport.;		0.44355	2.4783	0.608558	1	195	113	154	GDC
Locus_10148_Transcript_8/10_Confidence_0.600_Length_3507	3507	Locus_10148_Transcript_8/10_Confidence_0.600_Length_3507	3507	Locus_10148_Transcript_8/10_Confidence_0.600_Length_3507	3507	Q01888	87.333	1.77e-83	GDC_BOVIN	Graves disease carrier protein	bta:282524	GO:0016021 \\ GO:0005743 \\ GO:0003735 \\ GO:0006412 \\ GO:0055085 \\	translation (GO:0006412);transmembrane transport (GO:0055085);	structural constituent of ribosome (GO:0003735);	integral component of membrane (GO:0016021);mitochondrial inner membrane (GO:0005743);	Complete proteome;Membrane;Mitochondrion;Mitochondrion inner membrane;Reference proteome;Repeat;Transmembrane;Transmembrane helix;Transport.;		-0.362831	3.01962	0.674474	1	217	220	218.5	GDC
Locus_10148_Transcript_9/10_Confidence_0.667_Length_3873	3873	Locus_10148_Transcript_9/10_Confidence_0.667_Length_3873	3873	Locus_10148_Transcript_9/10_Confidence_0.667_Length_3873	3873	Q01888	86.344	2.11e-132	GDC_BOVIN	Graves disease carrier protein	bta:282524	GO:0016021 \\ GO:0005743 \\ GO:0003735 \\ GO:0006412 \\ GO:0055085 \\	translation (GO:0006412);transmembrane transport (GO:0055085);	structural constituent of ribosome (GO:0003735);	integral component of membrane (GO:0016021);mitochondrial inner membrane (GO:0005743);	Complete proteome;Membrane;Mitochondrion;Mitochondrion inner membrane;Reference proteome;Repeat;Transmembrane;Transmembrane helix;Transport.;		0.0575194	2.91624	0.953517	1	235	178	206.5	GDC
Locus_10149_Transcript_1/1_Confidence_1.000_Length_3730	3730	Locus_10149_Transcript_1/1_Confidence_1.000_Length_3730	3730	Locus_10149_Transcript_1/1_Confidence_1.000_Length_3730	3730	O43639	92.632	0	NCK2_HUMAN	Cytoplasmic protein NCK2	hsa:8440	GO:0005737 \\ GO:0005829 \\ GO:0005783 \\ GO:0097481 \\ GO:0005802 \\ GO:0012506 \\ GO:0005086 \\ GO:0008093 \\ GO:0030159 \\ GO:0005070 \\ GO:0007015 \\ GO:0007411 \\ GO:0016477 \\ GO:0060996 \\ GO:0048013 \\ GO:0007173 \\ GO:0001771 \\ GO:0030032 \\ GO:0008285 \\ GO:1903912 \\ GO:0033137 \\ GO:1903898 \\ GO:1990441 \\ GO:0030838 \\ GO:1902237 \\ GO:0043547 \\ GO:0042102 \\ GO:0045944 \\ GO:0036…	actin filament organization (GO:0007015);axon guidance (GO:0007411);cell migration (GO:0016477);dendritic spine development (GO:0060996);ephrin receptor signaling pathway (GO:0048013);epidermal growth factor receptor signaling pathway (GO:0007173);immunological synapse formation (GO:0001771);lamellipodium assembly (GO:0030032);negative regulation of cell proliferation (GO:0008285);negative regula…	ARF guanyl-nucleotide exchange factor activity (GO:0005086);cytoskeletal adaptor activity (GO:0008093);receptor signaling complex scaffold activity (GO:0030159);SH3/SH2 adaptor activity (GO:0005070);	cytoplasm (GO:0005737);cytosol (GO:0005829);endoplasmic reticulum (GO:0005783);neuronal postsynaptic density (GO:0097481);trans-Golgi network (GO:0005802);vesicle membrane (GO:0012506);	3D-structure;Acetylation;Complete proteome;Cytoplasm;Endoplasmic reticulum;Phosphoprotein;Reference proteome;Repeat;SH2 domain;SH3 domain;Translation regulation.;		-0.278989	3.53923	0.744409	1	322	308	315	NCK2
Locus_1015_Transcript_1/1_Confidence_1.000_Length_2247	2247	Locus_1015_Transcript_1/1_Confidence_1.000_Length_2247	2247	Locus_1015_Transcript_1/1_Confidence_1.000_Length_2247	2247	C9J7I0	61.165	1.42e-31	UMAD1_HUMAN	UBAP1-MVB12-associated (UMA)-domain containing protein 1 {ECO:0000312|HGNC:HGNC:48955}	No_KEGG	No_GOcodes	No_GOBP	No_GOMF	No_GOCC	Complete proteome;Reference proteome.;		0.0490513	2.60945	0.958892	1	189	144	166.5	UMAD1
Locus_10150_Transcript_1/1_Confidence_1.000_Length_1674	1674	No_sig_nr_hit	No_sig_nr_hit	No_sig_nr_hit	No_sig_nr_hit	No_Uniprotmatch	No_%_identity	No_evalue	No_ID	No_Description	No_KEGG	No_GO	No_GOCC	No_GOBP	No_GOMF	No_keywords		1.38558	-0.0165052	0.176253	1	40	12	26	No
Locus_10152_Transcript_2/3_Confidence_0.667_Length_1177	1177	No_sig_nr_hit	No_sig_nr_hit	No_sig_nr_hit	No_sig_nr_hit	No_Uniprotmatch	No_%_identity	No_evalue	No_ID	No_Description	No_KEGG	No_GO	No_GOCC	No_GOBP	No_GOMF	No_keywords		0.141968	1.53082	0.879531	1	91	65	78	No
Locus_10152_Transcript_3/3_Confidence_0.667_Length_614	614	No_sig_nr_hit	No_sig_nr_hit	No_sig_nr_hit	No_sig_nr_hit	No_Uniprotmatch	No_%_identity	No_evalue	No_ID	No_Description	No_KEGG	No_GO	No_GOCC	No_GOBP	No_GOMF	No_keywords		-0.2275	2.06591	0.799418	1	117	108	112.5	No
Locus_101521_Transcript_1/1_Confidence_1.000_Length_289	289	No_sig_nr_hit	No_sig_nr_hit	No_sig_nr_hit	No_sig_nr_hit	No_Uniprotmatch	No_%_identity	No_evalue	No_ID	No_Description	No_KEGG	No_GO	No_GOCC	No_GOBP	No_GOMF	No_keywords		0.561527	0.385621	0.566208	1	45	24	34.5	No
Locus_10153_Transcript_1/1_Confidence_1.000_Length_802	802	No_sig_nr_hit	No_sig_nr_hit	No_sig_nr_hit	No_sig_nr_hit	No_Uniprotmatch	No_%_identity	No_evalue	No_ID	No_Description	No_KEGG	No_GO	No_GOCC	No_GOBP	No_GOMF	No_keywords		1.02922	2.73805	0.230412	1	272	105	188.5	No
Locus_10155_Transcript_5/7_Confidence_0.667_Length_6508	6508	Locus_10155_Transcript_5/7_Confidence_0.667_Length_6508	6508	Locus_10155_Transcript_5/7_Confidence_0.667_Length_6508	6508	Q8TF72	77.888	1.69e-130	SHRM3_HUMAN	Protein Shroom3	hsa:57619	GO:0005912 \\ GO:0043296 \\ GO:0016324 \\ GO:0005737 \\ GO:0005856 \\ GO:0005874 \\ GO:0030036 \\ GO:0045176 \\ GO:0000902 \\ GO:0043482 \\ GO:0002066 \\ GO:0001843 \\ GO:0007389 \\ GO:0008360 \\	actin cytoskeleton organization (GO:0030036);apical protein localization (GO:0045176);cell morphogenesis (GO:0000902);cellular pigment accumulation (GO:0043482);columnar/cuboidal epithelial cell development (GO:0002066);neural tube closure (GO:0001843);pattern specification process (GO:0007389);regulation of cell shape (GO:0008360);	No_GOMF	adherens junction (GO:0005912);apical junction complex (GO:0043296);apical plasma membrane (GO:0016324);cytoplasm (GO:0005737);cytoskeleton (GO:0005856);microtubule (GO:0005874);	Actin-binding;Alternative splicing;Cell junction;Cell shape;Complete proteome;Cytoplasm;Cytoskeleton;Developmental protein;Microtubule;Phosphoprotein;Polymorphism;Reference proteome.;		-0.883511	4.87763	0.295519	1	636	925	780.5	SHRM3
Locus_10157_Transcript_1/2_Confidence_0.750_Length_2773	2773	No_sig_nr_hit	No_sig_nr_hit	No_sig_nr_hit	No_sig_nr_hit	No_Uniprotmatch	No_%_identity	No_evalue	No_ID	No_Description	No_KEGG	No_GO	No_GOCC	No_GOBP	No_GOMF	No_keywords		0.101845	2.83936	0.908985	1	226	166	196	No
Locus_10158_Transcript_1/2_Confidence_0.750_Length_1999	1999	Locus_10158_Transcript_1/2_Confidence_0.750_Length_1999	1999	Locus_10158_Transcript_1/2_Confidence_0.750_Length_1999	1999	Q03413	78.707	0	MEF2D_XENLA	Myocyte-specific enhancer factor 2D homolog	xla:399340	GO:0005634 \\ GO:0003677 \\ GO:0006355 \\ GO:0006351 \\	regulation of transcription, DNA-templated (GO:0006355);transcription, DNA-templated (GO:0006351);	DNA binding (GO:0003677);	nucleus (GO:0005634);	Activator;DNA-binding;Nucleus;Transcription;Transcription regulation.;		-1.71707	1.091	0.0581333	1	30	78	54	MEF2D
Locus_10158_Transcript_2/2_Confidence_0.750_Length_1978	1978	Locus_10158_Transcript_2/2_Confidence_0.750_Length_1978	1978	Locus_10158_Transcript_2/2_Confidence_0.750_Length_1978	1978	Q03413	78.286	0	MEF2D_XENLA	Myocyte-specific enhancer factor 2D homolog	xla:399340	GO:0005634 \\ GO:0003677 \\ GO:0006355 \\ GO:0006351 \\	regulation of transcription, DNA-templated (GO:0006355);transcription, DNA-templated (GO:0006351);	DNA binding (GO:0003677);	nucleus (GO:0005634);	Activator;DNA-binding;Nucleus;Transcription;Transcription regulation.;		-1.78171	1.23015	0.0502752	1	32	87	59.5	MEF2D
Locus_10159_Transcript_1/7_Confidence_0.474_Length_2976	2976	Locus_10159_Transcript_1/7_Confidence_0.474_Length_2976	2976	Locus_10159_Transcript_1/7_Confidence_0.474_Length_2976	2976	O70258	92.222	0	SGCE_MOUSE	Epsilon-sarcoglycan	mmu:20392	GO:0005856 \\ GO:0030425 \\ GO:0032590 \\ GO:0016010 \\ GO:0005794 \\ GO:0005887 \\ GO:0005886 \\ GO:0016012 \\ GO:0042383 \\	No_GOBP	No_GOMF	cytoskeleton (GO:0005856);dendrite (GO:0030425);dendrite membrane (GO:0032590);dystrophin-associated glycoprotein complex (GO:0016010);Golgi apparatus (GO:0005794);integral component of plasma membrane (GO:0005887);plasma membrane (GO:0005886);sarcoglycan complex (GO:0016012);sarcolemma (GO:0042383);	Alternative splicing;Cell membrane;Cell projection;Complete proteome;Cytoplasm;Cytoskeleton;Glycoprotein;Golgi apparatus;Membrane;Reference proteome;Transmembrane;Transmembrane helix;Ubl conjugation.;		-0.865662	0.267603	0.378371	1	25	36	30.5	SGCE
Locus_10159_Transcript_2/7_Confidence_0.316_Length_2938	2938	Locus_10159_Transcript_2/7_Confidence_0.316_Length_2938	2938	Locus_10159_Transcript_2/7_Confidence_0.316_Length_2938	2938	O43556	95.918	0	SGCE_HUMAN	Epsilon-sarcoglycan	hsa:8910	GO:0005856 \\ GO:0030425 \\ GO:0032590 \\ GO:0016010 \\ GO:0005794 \\ GO:0005887 \\ GO:0005886 \\ GO:0016012 \\ GO:0042383 \\ GO:0007160 \\ GO:0007517 \\	cell-matrix adhesion (GO:0007160);muscle organ development (GO:0007517);	No_GOMF	cytoskeleton (GO:0005856);dendrite (GO:0030425);dendrite membrane (GO:0032590);dystrophin-associated glycoprotein complex (GO:0016010);Golgi apparatus (GO:0005794);integral component of plasma membrane (GO:0005887);plasma membrane (GO:0005886);sarcoglycan complex (GO:0016012);sarcolemma (GO:0042383);	Alternative splicing;Cell membrane;Cell projection;Complete proteome;Cytoplasm;Cytoskeleton;Disease mutation;Dystonia;Glycoprotein;Golgi apparatus;Membrane;Reference proteome;Transmembrane;Transmembrane helix;Ubl conjugation.;		-0.235231	0.0811049	0.862226	1	28	26	27	SGCE
Locus_10159_Transcript_4/7_Confidence_0.421_Length_4199	4199	Locus_10159_Transcript_4/7_Confidence_0.421_Length_4199	4199	Locus_10159_Transcript_4/7_Confidence_0.421_Length_4199	4199	Q4R5B1	95.918	0	SGCE_MACFA	Epsilon-sarcoglycan {ECO:0000250|UniProtKB:O43556}	No_KEGG	GO:0005856 \\ GO:0030425 \\ GO:0032590 \\ GO:0005794 \\ GO:0016021 \\ GO:0005886 \\ GO:0016012 \\ GO:0042383 \\	No_GOBP	No_GOMF	cytoskeleton (GO:0005856);dendrite (GO:0030425);dendrite membrane (GO:0032590);Golgi apparatus (GO:0005794);integral component of membrane (GO:0016021);plasma membrane (GO:0005886);sarcoglycan complex (GO:0016012);sarcolemma (GO:0042383);	Cell membrane;Cell projection;Cytoplasm;Cytoskeleton;Glycoprotein;Golgi apparatus;Membrane;Transmembrane;Transmembrane helix;Ubl conjugation.;		-0.81975	0.621665	0.373122	1	33	46	39.5	SGCE
Locus_10159_Transcript_5/7_Confidence_0.579_Length_4243	4243	Locus_10159_Transcript_5/7_Confidence_0.579_Length_4243	4243	Locus_10159_Transcript_5/7_Confidence_0.579_Length_4243	4243	O70258	92.798	0	SGCE_MOUSE	Epsilon-sarcoglycan	mmu:20392	GO:0005856 \\ GO:0030425 \\ GO:0032590 \\ GO:0016010 \\ GO:0005794 \\ GO:0005887 \\ GO:0005886 \\ GO:0016012 \\ GO:0042383 \\	No_GOBP	No_GOMF	cytoskeleton (GO:0005856);dendrite (GO:0030425);dendrite membrane (GO:0032590);dystrophin-associated glycoprotein complex (GO:0016010);Golgi apparatus (GO:0005794);integral component of plasma membrane (GO:0005887);plasma membrane (GO:0005886);sarcoglycan complex (GO:0016012);sarcolemma (GO:0042383);	Alternative splicing;Cell membrane;Cell projection;Complete proteome;Cytoplasm;Cytoskeleton;Glycoprotein;Golgi apparatus;Membrane;Reference proteome;Transmembrane;Transmembrane helix;Ubl conjugation.;		-1.73176	0.464614	0.0751888	1	19	50	34.5	SGCE
Locus_10159_Transcript_6/7_Confidence_0.684_Length_4401	4401	Locus_10159_Transcript_6/7_Confidence_0.684_Length_4401	4401	Locus_10159_Transcript_6/7_Confidence_0.684_Length_4401	4401	O70258	92.732	0	SGCE_MOUSE	Epsilon-sarcoglycan	mmu:20392	GO:0005856 \\ GO:0030425 \\ GO:0032590 \\ GO:0016010 \\ GO:0005794 \\ GO:0005887 \\ GO:0005886 \\ GO:0016012 \\ GO:0042383 \\	No_GOBP	No_GOMF	cytoskeleton (GO:0005856);dendrite (GO:0030425);dendrite membrane (GO:0032590);dystrophin-associated glycoprotein complex (GO:0016010);Golgi apparatus (GO:0005794);integral component of plasma membrane (GO:0005887);plasma membrane (GO:0005886);sarcoglycan complex (GO:0016012);sarcolemma (GO:0042383);	Alternative splicing;Cell membrane;Cell projection;Complete proteome;Cytoplasm;Cytoskeleton;Glycoprotein;Golgi apparatus;Membrane;Reference proteome;Transmembrane;Transmembrane helix;Ubl conjugation.;		-1.15385	0.651256	0.228813	1	29	51	40	SGCE
Locus_1016_Transcript_2/8_Confidence_0.250_Length_1142	1142	Locus_1016_Transcript_2/8_Confidence_0.250_Length_1142	1142	Locus_1016_Transcript_2/8_Confidence_0.250_Length_1142	1142	Q5RF00	89.437	9.01e-77	ALDH2_PONAB	Aldehyde dehydrogenase, mitochondrial	pon:100171596	GO:0005759 \\ GO:0004029 \\	No_GOBP	aldehyde dehydrogenase (NAD) activity (GO:0004029);	mitochondrial matrix (GO:0005759);	Acetylation;Complete proteome;Mitochondrion;NAD;Oxidoreductase;Reference proteome;Transit peptide.;		-0.739025	2.9236	0.385927	1	174	229	201.5	ALDH2
Locus_1016_Transcript_3/8_Confidence_0.500_Length_2320	2320	Locus_1016_Transcript_3/8_Confidence_0.500_Length_2320	2320	Locus_1016_Transcript_3/8_Confidence_0.500_Length_2320	2320	P11884	85.019	0	ALDH2_RAT	Aldehyde dehydrogenase, mitochondrial	rno:29539	GO:0005759 \\ GO:0005739 \\ GO:0004029 \\ GO:0042802 \\ GO:0070404 \\ GO:0071398 \\ GO:0032870 \\ GO:0006068 \\ GO:0001889 \\ GO:0043066 \\ GO:0032355 \\ GO:0055093 \\ GO:0032496 \\ GO:0035094 \\ GO:0032570 \\ GO:0033574 \\	cellular response to fatty acid (GO:0071398);cellular response to hormone stimulus (GO:0032870);ethanol catabolic process (GO:0006068);liver development (GO:0001889);negative regulation of apoptotic process (GO:0043066);response to estradiol (GO:0032355);response to hyperoxia (GO:0055093);response to lipopolysaccharide (GO:0032496);response to nicotine (GO:0035094);response to progesterone (GO:00…	aldehyde dehydrogenase (NAD) activity (GO:0004029);identical protein binding (GO:0042802);NADH binding (GO:0070404);	mitochondrial matrix (GO:0005759);mitochondrion (GO:0005739);	3D-structure;Acetylation;Complete proteome;Direct protein sequencing;Mitochondrion;NAD;Oxidoreductase;Polymorphism;Reference proteome;Transit peptide.;		0.37466	6.63612	0.65401	1	3459	2103	2781	ALDH2
Locus_1016_Transcript_4/8_Confidence_0.438_Length_2190	2190	Locus_1016_Transcript_4/8_Confidence_0.438_Length_2190	2190	Locus_1016_Transcript_4/8_Confidence_0.438_Length_2190	2190	P81178	88.767	0	ALDH2_MESAU	Aldehyde dehydrogenase, mitochondrial	No_KEGG	GO:0005759 \\ GO:0004029 \\ GO:0006068 \\	ethanol catabolic process (GO:0006068);	aldehyde dehydrogenase (NAD) activity (GO:0004029);	mitochondrial matrix (GO:0005759);	Acetylation;Direct protein sequencing;Mitochondrion;NAD;Oxidoreductase.;		0.0243019	5.91399	0.977612	1	1872	1451	1661.5	ALDH2
Locus_1016_Transcript_5/8_Confidence_0.625_Length_3322	3322	Locus_1016_Transcript_5/8_Confidence_0.625_Length_3322	3322	Locus_1016_Transcript_5/8_Confidence_0.625_Length_3322	3322	P81178	88.767	0	ALDH2_MESAU	Aldehyde dehydrogenase, mitochondrial	No_KEGG	GO:0005759 \\ GO:0004029 \\ GO:0006068 \\	ethanol catabolic process (GO:0006068);	aldehyde dehydrogenase (NAD) activity (GO:0004029);	mitochondrial matrix (GO:0005759);	Acetylation;Direct protein sequencing;Mitochondrion;NAD;Oxidoreductase.;		0.326319	6.63888	0.696227	1	3415	2147	2781	ALDH2
Locus_1016_Transcript_6/8_Confidence_0.438_Length_2112	2112	Locus_1016_Transcript_6/8_Confidence_0.438_Length_2112	2112	Locus_1016_Transcript_6/8_Confidence_0.438_Length_2112	2112	P81178	88.767	0	ALDH2_MESAU	Aldehyde dehydrogenase, mitochondrial	No_KEGG	GO:0005759 \\ GO:0004029 \\ GO:0006068 \\	ethanol catabolic process (GO:0006068);	aldehyde dehydrogenase (NAD) activity (GO:0004029);	mitochondrial matrix (GO:0005759);	Acetylation;Direct protein sequencing;Mitochondrion;NAD;Oxidoreductase.;		-0.032982	5.89725	0.969291	1	1814	1463	1638.5	ALDH2
Locus_1016_Transcript_7/8_Confidence_0.562_Length_1893	1893	Locus_1016_Transcript_7/8_Confidence_0.562_Length_1893	1893	Locus_1016_Transcript_7/8_Confidence_0.562_Length_1893	1893	Q5RF00	89.437	4.07e-74	ALDH2_PONAB	Aldehyde dehydrogenase, mitochondrial	pon:100171596	GO:0005759 \\ GO:0004029 \\	No_GOBP	aldehyde dehydrogenase (NAD) activity (GO:0004029);	mitochondrial matrix (GO:0005759);	Acetylation;Complete proteome;Mitochondrion;NAD;Oxidoreductase;Reference proteome;Transit peptide.;		0.465105	5.90082	0.578715	1	2133	1218	1675.5	ALDH2
Locus_1016_Transcript_8/8_Confidence_0.500_Length_2621	2621	Locus_1016_Transcript_8/8_Confidence_0.500_Length_2621	2621	Locus_1016_Transcript_8/8_Confidence_0.500_Length_2621	2621	P81178	88.767	0	ALDH2_MESAU	Aldehyde dehydrogenase, mitochondrial	No_KEGG	GO:0005759 \\ GO:0004029 \\ GO:0006068 \\	ethanol catabolic process (GO:0006068);	aldehyde dehydrogenase (NAD) activity (GO:0004029);	mitochondrial matrix (GO:0005759);	Acetylation;Direct protein sequencing;Mitochondrion;NAD;Oxidoreductase.;		0.308948	6.73223	0.711599	1	3624	2306	2965	ALDH2
Locus_10160_Transcript_1/10_Confidence_0.345_Length_2041	2041	Locus_10160_Transcript_1/10_Confidence_0.345_Length_2041	2041	Locus_10160_Transcript_1/10_Confidence_0.345_Length_2041	2041	Q9D5J6	66.063	0	SHPK_MOUSE	Sedoheptulokinase	mmu:74637	GO:0005737 \\ GO:0005524 \\ GO:0050277 \\ GO:0005975 \\ GO:0035963 \\ GO:0071353 \\ GO:0071222 \\ GO:0009052 \\ GO:0016310 \\ GO:0050727 \\ GO:0043030 \\	carbohydrate metabolic process (GO:0005975);cellular response to interleukin-13 (GO:0035963);cellular response to interleukin-4 (GO:0071353);cellular response to lipopolysaccharide (GO:0071222);pentose-phosphate shunt, non-oxidative branch (GO:0009052);phosphorylation (GO:0016310);regulation of inflammatory response (GO:0050727);regulation of macrophage activation (GO:0043030);	ATP binding (GO:0005524);sedoheptulokinase activity (GO:0050277);	cytoplasm (GO:0005737);	ATP-binding;Complete proteome;Cytoplasm;Kinase;Nucleotide-binding;Reference proteome;Transferase.;		-0.441705	2.44766	0.610729	1	141	151	146	SHPK
Locus_10160_Transcript_2/10_Confidence_0.414_Length_1827	1827	Locus_10160_Transcript_2/10_Confidence_0.414_Length_1827	1827	Locus_10160_Transcript_2/10_Confidence_0.414_Length_1827	1827	Q9D5J6	66.366	6.03e-157	SHPK_MOUSE	Sedoheptulokinase	mmu:74637	GO:0005737 \\ GO:0005524 \\ GO:0050277 \\ GO:0005975 \\ GO:0035963 \\ GO:0071353 \\ GO:0071222 \\ GO:0009052 \\ GO:0016310 \\ GO:0050727 \\ GO:0043030 \\	carbohydrate metabolic process (GO:0005975);cellular response to interleukin-13 (GO:0035963);cellular response to interleukin-4 (GO:0071353);cellular response to lipopolysaccharide (GO:0071222);pentose-phosphate shunt, non-oxidative branch (GO:0009052);phosphorylation (GO:0016310);regulation of inflammatory response (GO:0050727);regulation of macrophage activation (GO:0043030);	ATP binding (GO:0005524);sedoheptulokinase activity (GO:0050277);	cytoplasm (GO:0005737);	ATP-binding;Complete proteome;Cytoplasm;Kinase;Nucleotide-binding;Reference proteome;Transferase.;		-0.326469	1.7308	0.719945	1	89	88	88.5	SHPK
Locus_10160_Transcript_3/10_Confidence_0.276_Length_1295	1295	Locus_10160_Transcript_3/10_Confidence_0.276_Length_1295	1295	Locus_10160_Transcript_3/10_Confidence_0.276_Length_1295	1295	Q9D5J6	61.935	6.67e-56	SHPK_MOUSE	Sedoheptulokinase	mmu:74637	GO:0005737 \\ GO:0005524 \\ GO:0050277 \\ GO:0005975 \\ GO:0035963 \\ GO:0071353 \\ GO:0071222 \\ GO:0009052 \\ GO:0016310 \\ GO:0050727 \\ GO:0043030 \\	carbohydrate metabolic process (GO:0005975);cellular response to interleukin-13 (GO:0035963);cellular response to interleukin-4 (GO:0071353);cellular response to lipopolysaccharide (GO:0071222);pentose-phosphate shunt, non-oxidative branch (GO:0009052);phosphorylation (GO:0016310);regulation of inflammatory response (GO:0050727);regulation of macrophage activation (GO:0043030);	ATP binding (GO:0005524);sedoheptulokinase activity (GO:0050277);	cytoplasm (GO:0005737);	ATP-binding;Complete proteome;Cytoplasm;Kinase;Nucleotide-binding;Reference proteome;Transferase.;		-1.41829	0.093049	0.154501	1	17	36	26.5	SHPK
Locus_10160_Transcript_4/10_Confidence_0.207_Length_1907	1907	Locus_10160_Transcript_4/10_Confidence_0.207_Length_1907	1907	Locus_10160_Transcript_4/10_Confidence_0.207_Length_1907	1907	Q9D5J6	67.354	1.18e-138	SHPK_MOUSE	Sedoheptulokinase	mmu:74637	GO:0005737 \\ GO:0005524 \\ GO:0050277 \\ GO:0005975 \\ GO:0035963 \\ GO:0071353 \\ GO:0071222 \\ GO:0009052 \\ GO:0016310 \\ GO:0050727 \\ GO:0043030 \\	carbohydrate metabolic process (GO:0005975);cellular response to interleukin-13 (GO:0035963);cellular response to interleukin-4 (GO:0071353);cellular response to lipopolysaccharide (GO:0071222);pentose-phosphate shunt, non-oxidative branch (GO:0009052);phosphorylation (GO:0016310);regulation of inflammatory response (GO:0050727);regulation of macrophage activation (GO:0043030);	ATP binding (GO:0005524);sedoheptulokinase activity (GO:0050277);	cytoplasm (GO:0005737);	ATP-binding;Complete proteome;Cytoplasm;Kinase;Nucleotide-binding;Reference proteome;Transferase.;		0.00670607	2.09772	1	1	130	102	116	SHPK
Locus_10160_Transcript_5/10_Confidence_0.586_Length_2118	2118	Locus_10160_Transcript_5/10_Confidence_0.586_Length_2118	2118	Locus_10160_Transcript_5/10_Confidence_0.586_Length_2118	2118	Q9UHJ6	65.106	2.68e-104	SHPK_HUMAN	Sedoheptulokinase	hsa:23729	GO:0005737 \\ GO:0005524 \\ GO:0050277 \\ GO:0005975 \\ GO:0035963 \\ GO:0071353 \\ GO:0071222 \\ GO:0009052 \\ GO:0016310 \\ GO:0050727 \\ GO:0043030 \\	carbohydrate metabolic process (GO:0005975);cellular response to interleukin-13 (GO:0035963);cellular response to interleukin-4 (GO:0071353);cellular response to lipopolysaccharide (GO:0071222);pentose-phosphate shunt, non-oxidative branch (GO:0009052);phosphorylation (GO:0016310);regulation of inflammatory response (GO:0050727);regulation of macrophage activation (GO:0043030);	ATP binding (GO:0005524);sedoheptulokinase activity (GO:0050277);	cytoplasm (GO:0005737);	ATP-binding;Complete proteome;Cytoplasm;Kinase;Nucleotide-binding;Polymorphism;Reference proteome;Transferase.;		-0.212308	2.17445	0.813613	1	127	116	121.5	SHPK
Locus_10160_Transcript_6/10_Confidence_0.414_Length_2177	2177	Locus_10160_Transcript_6/10_Confidence_0.414_Length_2177	2177	Locus_10160_Transcript_6/10_Confidence_0.414_Length_2177	2177	Q9D5J6	66.505	3.15e-86	SHPK_MOUSE	Sedoheptulokinase	mmu:74637	GO:0005737 \\ GO:0005524 \\ GO:0050277 \\ GO:0005975 \\ GO:0035963 \\ GO:0071353 \\ GO:0071222 \\ GO:0009052 \\ GO:0016310 \\ GO:0050727 \\ GO:0043030 \\	carbohydrate metabolic process (GO:0005975);cellular response to interleukin-13 (GO:0035963);cellular response to interleukin-4 (GO:0071353);cellular response to lipopolysaccharide (GO:0071222);pentose-phosphate shunt, non-oxidative branch (GO:0009052);phosphorylation (GO:0016310);regulation of inflammatory response (GO:0050727);regulation of macrophage activation (GO:0043030);	ATP binding (GO:0005524);sedoheptulokinase activity (GO:0050277);	cytoplasm (GO:0005737);	ATP-binding;Complete proteome;Cytoplasm;Kinase;Nucleotide-binding;Reference proteome;Transferase.;		-0.826146	0.706968	0.378815	1	35	49	42	SHPK
Locus_10160_Transcript_7/10_Confidence_0.552_Length_2582	2582	Locus_10160_Transcript_7/10_Confidence_0.552_Length_2582	2582	Locus_10160_Transcript_7/10_Confidence_0.552_Length_2582	2582	Q9UHJ6	65.106	9.39e-103	SHPK_HUMAN	Sedoheptulokinase	hsa:23729	GO:0005737 \\ GO:0005524 \\ GO:0050277 \\ GO:0005975 \\ GO:0035963 \\ GO:0071353 \\ GO:0071222 \\ GO:0009052 \\ GO:0016310 \\ GO:0050727 \\ GO:0043030 \\	carbohydrate metabolic process (GO:0005975);cellular response to interleukin-13 (GO:0035963);cellular response to interleukin-4 (GO:0071353);cellular response to lipopolysaccharide (GO:0071222);pentose-phosphate shunt, non-oxidative branch (GO:0009052);phosphorylation (GO:0016310);regulation of inflammatory response (GO:0050727);regulation of macrophage activation (GO:0043030);	ATP binding (GO:0005524);sedoheptulokinase activity (GO:0050277);	cytoplasm (GO:0005737);	ATP-binding;Complete proteome;Cytoplasm;Kinase;Nucleotide-binding;Polymorphism;Reference proteome;Transferase.;		0.210888	2.32368	0.811339	1	163	111	137	SHPK
Locus_10160_Transcript_8/10_Confidence_0.414_Length_2122	2122	Locus_10160_Transcript_8/10_Confidence_0.414_Length_2122	2122	Locus_10160_Transcript_8/10_Confidence_0.414_Length_2122	2122	Q9D5J6	62.26	0	SHPK_MOUSE	Sedoheptulokinase	mmu:74637	GO:0005737 \\ GO:0005524 \\ GO:0050277 \\ GO:0005975 \\ GO:0035963 \\ GO:0071353 \\ GO:0071222 \\ GO:0009052 \\ GO:0016310 \\ GO:0050727 \\ GO:0043030 \\	carbohydrate metabolic process (GO:0005975);cellular response to interleukin-13 (GO:0035963);cellular response to interleukin-4 (GO:0071353);cellular response to lipopolysaccharide (GO:0071222);pentose-phosphate shunt, non-oxidative branch (GO:0009052);phosphorylation (GO:0016310);regulation of inflammatory response (GO:0050727);regulation of macrophage activation (GO:0043030);	ATP binding (GO:0005524);sedoheptulokinase activity (GO:0050277);	cytoplasm (GO:0005737);	ATP-binding;Complete proteome;Cytoplasm;Kinase;Nucleotide-binding;Reference proteome;Transferase.;		-0.10214	2.52449	0.912976	1	169	143	156	SHPK
Locus_10160_Transcript_9/10_Confidence_0.448_Length_2743	2743	Locus_10160_Transcript_9/10_Confidence_0.448_Length_2743	2743	Locus_10160_Transcript_9/10_Confidence_0.448_Length_2743	2743	Q9D5J6	67.354	2.7e-135	SHPK_MOUSE	Sedoheptulokinase	mmu:74637	GO:0005737 \\ GO:0005524 \\ GO:0050277 \\ GO:0005975 \\ GO:0035963 \\ GO:0071353 \\ GO:0071222 \\ GO:0009052 \\ GO:0016310 \\ GO:0050727 \\ GO:0043030 \\	carbohydrate metabolic process (GO:0005975);cellular response to interleukin-13 (GO:0035963);cellular response to interleukin-4 (GO:0071353);cellular response to lipopolysaccharide (GO:0071222);pentose-phosphate shunt, non-oxidative branch (GO:0009052);phosphorylation (GO:0016310);regulation of inflammatory response (GO:0050727);regulation of macrophage activation (GO:0043030);	ATP binding (GO:0005524);sedoheptulokinase activity (GO:0050277);	cytoplasm (GO:0005737);	ATP-binding;Complete proteome;Cytoplasm;Kinase;Nucleotide-binding;Reference proteome;Transferase.;		-0.0571218	2.22391	0.957011	1	139	114	126.5	SHPK
Locus_101604_Transcript_1/1_Confidence_0.692_Length_204	204	Locus_101604_Transcript_1/1_Confidence_0.692_Length_204	204	Locus_101604_Transcript_1/1_Confidence_0.692_Length_204	204	Q8NGD0	55.556	4.16e-10	OR4M1_HUMAN	Olfactory receptor 4M1	hsa:441670	GO:0016021 \\ GO:0005886 \\ GO:0004930 \\ GO:0004984 \\ GO:0004888 \\ GO:0050907 \\ GO:0007186 \\	detection of chemical stimulus involved in sensory perception (GO:0050907);G-protein coupled receptor signaling pathway (GO:0007186);	G-protein coupled receptor activity (GO:0004930);olfactory receptor activity (GO:0004984);transmembrane signaling receptor activity (GO:0004888);	integral component of membrane (GO:0016021);plasma membrane (GO:0005886);	Cell membrane;Complete proteome;Disulfide bond;G-protein coupled receptor;Glycoprotein;Membrane;Olfaction;Polymorphism;Receptor;Reference proteome;Sensory transduction;Transducer;Transmembrane;Transmembrane helix.;		-0.405117	-0.15765	0.681784	1	22	23	22.5	OR4M1
Locus_10161_Transcript_1/1_Confidence_1.000_Length_1299	1299	Locus_10161_Transcript_1/1_Confidence_1.000_Length_1299	1299	Locus_10161_Transcript_1/1_Confidence_1.000_Length_1299	1299	Q9NWR8	62.937	5.1e-123	MCUB_HUMAN	Calcium uniporter regulatory subunit MCUb, mitochondrial	hsa:55013	GO:0034704 \\ GO:0031305 \\ GO:0031224 \\ GO:0005739 \\ GO:1990246 \\ GO:0019855 \\ GO:0036444 \\ GO:0051560 \\ GO:0006851 \\	calcium ion transmembrane import into mitochondrion (GO:0036444);mitochondrial calcium ion homeostasis (GO:0051560);mitochondrial calcium ion transport (GO:0006851);	calcium channel inhibitor activity (GO:0019855);	calcium channel complex (GO:0034704);integral component of mitochondrial inner membrane (GO:0031305);intrinsic component of membrane (GO:0031224);mitochondrion (GO:0005739);uniplex complex (GO:1990246);	Calcium;Calcium transport;Coiled coil;Complete proteome;Ion transport;Membrane;Mitochondrion;Mitochondrion inner membrane;Polymorphism;Reference proteome;Transit peptide;Transmembrane;Transmembrane helix;Transport.;		-1.0533	1.55788	0.231572	1	58	95	76.5	MCUB
Locus_10164_Transcript_1/1_Confidence_1.000_Length_3107	3107	Locus_10164_Transcript_1/1_Confidence_1.000_Length_3107	3107	Locus_10164_Transcript_1/1_Confidence_1.000_Length_3107	3107	Q3SZ48	92.52	1.89e-164	TM55A_BOVIN	Type 2 phosphatidylinositol 4,5-bisphosphate 4-phosphatase	bta:616641	GO:0016021 \\ GO:0031902 \\ GO:0005765 \\ GO:0034597 \\ GO:0046856 \\	phosphatidylinositol dephosphorylation (GO:0046856);	phosphatidylinositol-4,5-bisphosphate 4-phosphatase activity (GO:0034597);	integral component of membrane (GO:0016021);late endosome membrane (GO:0031902);lysosomal membrane (GO:0005765);	Complete proteome;Endosome;Hydrolase;Lysosome;Membrane;Phosphoprotein;Reference proteome;Transmembrane;Transmembrane helix.;		1.18973	2.40696	0.173741	1	223	77	150	TM55A
Locus_10165_Transcript_1/8_Confidence_0.368_Length_2983	2983	Locus_10165_Transcript_1/8_Confidence_0.368_Length_2983	2983	Locus_10165_Transcript_1/8_Confidence_0.368_Length_2983	2983	Q12959	91.823	0	DLG1_HUMAN	Disks large homolog 1	hsa:1739	GO:0005605 \\ GO:0016323 \\ GO:0005923 \\ GO:0030054 \\ GO:0031253 \\ GO:0005911 \\ GO:0005737 \\ GO:0009898 \\ GO:0005829 \\ GO:0005783 \\ GO:0005789 \\ GO:0070062 \\ GO:0005794 \\ GO:0001772 \\ GO:0014704 \\ GO:0043219 \\ GO:0016328 \\ GO:0045121 \\ GO:0005874 \\ GO:0097025 \\ GO:0035748 \\ GO:0031594 \\ GO:0033268 \\ GO:0005634 \\ GO:0048471 \\ GO:0005886 \\ GO:0014069 \\ GO:0045211 \\ GO:0042…	actin filament organization (GO:0007015);activation of protein kinase activity (GO:0032147);amyloid precursor protein metabolic process (GO:0042982);astral microtubule organization (GO:0030953);axon guidance (GO:0007411);bicellular tight junction assembly (GO:0070830);branching involved in ureteric bud morphogenesis (GO:0001658);cellular protein complex localization (GO:0034629);cortical actin cy…	cytoskeletal protein binding (GO:0008092);guanylate kinase activity (GO:0004385);ion channel binding (GO:0044325);ionotropic glutamate receptor binding (GO:0035255);L27 domain binding (GO:0097016);mitogen-activated protein kinase kinase binding (GO:0031434);phosphatase binding (GO:0019902);phosphoprotein phosphatase activity (GO:0004721);potassium channel regulator activity (GO:0015459);protein C…	basal lamina (GO:0005605);basolateral plasma membrane (GO:0016323);bicellular tight junction (GO:0005923);cell junction (GO:0030054);cell projection membrane (GO:0031253);cell-cell junction (GO:0005911);cytoplasm (GO:0005737);cytoplasmic side of plasma membrane (GO:0009898);cytosol (GO:0005829);endoplasmic reticulum (GO:0005783);endoplasmic reticulum membrane (GO:0005789);extracellular exosome (G…	3D-structure;Alternative splicing;Cell junction;Cell membrane;Complete proteome;Endoplasmic reticulum;Host-virus interaction;Membrane;Phosphoprotein;Polymorphism;Postsynaptic cell membrane;Reference proteome;Repeat;SH3 domain;Synapse.;		-0.0212519	1.02365	1	1	60	48	54	DLG1
Locus_10165_Transcript_4/8_Confidence_0.526_Length_3032	3032	Locus_10165_Transcript_4/8_Confidence_0.526_Length_3032	3032	Locus_10165_Transcript_4/8_Confidence_0.526_Length_3032	3032	Q12959	87.941	0	DLG1_HUMAN	Disks large homolog 1	hsa:1739	GO:0005605 \\ GO:0016323 \\ GO:0005923 \\ GO:0030054 \\ GO:0031253 \\ GO:0005911 \\ GO:0005737 \\ GO:0009898 \\ GO:0005829 \\ GO:0005783 \\ GO:0005789 \\ GO:0070062 \\ GO:0005794 \\ GO:0001772 \\ GO:0014704 \\ GO:0043219 \\ GO:0016328 \\ GO:0045121 \\ GO:0005874 \\ GO:0097025 \\ GO:0035748 \\ GO:0031594 \\ GO:0033268 \\ GO:0005634 \\ GO:0048471 \\ GO:0005886 \\ GO:0014069 \\ GO:0045211 \\ GO:0042…	actin filament organization (GO:0007015);activation of protein kinase activity (GO:0032147);amyloid precursor protein metabolic process (GO:0042982);astral microtubule organization (GO:0030953);axon guidance (GO:0007411);bicellular tight junction assembly (GO:0070830);branching involved in ureteric bud morphogenesis (GO:0001658);cellular protein complex localization (GO:0034629);cortical actin cy…	cytoskeletal protein binding (GO:0008092);guanylate kinase activity (GO:0004385);ion channel binding (GO:0044325);ionotropic glutamate receptor binding (GO:0035255);L27 domain binding (GO:0097016);mitogen-activated protein kinase kinase binding (GO:0031434);phosphatase binding (GO:0019902);phosphoprotein phosphatase activity (GO:0004721);potassium channel regulator activity (GO:0015459);protein C…	basal lamina (GO:0005605);basolateral plasma membrane (GO:0016323);bicellular tight junction (GO:0005923);cell junction (GO:0030054);cell projection membrane (GO:0031253);cell-cell junction (GO:0005911);cytoplasm (GO:0005737);cytoplasmic side of plasma membrane (GO:0009898);cytosol (GO:0005829);endoplasmic reticulum (GO:0005783);endoplasmic reticulum membrane (GO:0005789);extracellular exosome (G…	3D-structure;Alternative splicing;Cell junction;Cell membrane;Complete proteome;Endoplasmic reticulum;Host-virus interaction;Membrane;Phosphoprotein;Polymorphism;Postsynaptic cell membrane;Reference proteome;Repeat;SH3 domain;Synapse.;		0.0716732	1.31026	0.959683	1	76	57	66.5	DLG1
Locus_10165_Transcript_5/8_Confidence_0.474_Length_3025	3025	Locus_10165_Transcript_5/8_Confidence_0.474_Length_3025	3025	Locus_10165_Transcript_5/8_Confidence_0.474_Length_3025	3025	Q12959	93.481	0	DLG1_HUMAN	Disks large homolog 1	hsa:1739	GO:0005605 \\ GO:0016323 \\ GO:0005923 \\ GO:0030054 \\ GO:0031253 \\ GO:0005911 \\ GO:0005737 \\ GO:0009898 \\ GO:0005829 \\ GO:0005783 \\ GO:0005789 \\ GO:0070062 \\ GO:0005794 \\ GO:0001772 \\ GO:0014704 \\ GO:0043219 \\ GO:0016328 \\ GO:0045121 \\ GO:0005874 \\ GO:0097025 \\ GO:0035748 \\ GO:0031594 \\ GO:0033268 \\ GO:0005634 \\ GO:0048471 \\ GO:0005886 \\ GO:0014069 \\ GO:0045211 \\ GO:0042…	actin filament organization (GO:0007015);activation of protein kinase activity (GO:0032147);amyloid precursor protein metabolic process (GO:0042982);astral microtubule organization (GO:0030953);axon guidance (GO:0007411);bicellular tight junction assembly (GO:0070830);branching involved in ureteric bud morphogenesis (GO:0001658);cellular protein complex localization (GO:0034629);cortical actin cy…	cytoskeletal protein binding (GO:0008092);guanylate kinase activity (GO:0004385);ion channel binding (GO:0044325);ionotropic glutamate receptor binding (GO:0035255);L27 domain binding (GO:0097016);mitogen-activated protein kinase kinase binding (GO:0031434);phosphatase binding (GO:0019902);phosphoprotein phosphatase activity (GO:0004721);potassium channel regulator activity (GO:0015459);protein C…	basal lamina (GO:0005605);basolateral plasma membrane (GO:0016323);bicellular tight junction (GO:0005923);cell junction (GO:0030054);cell projection membrane (GO:0031253);cell-cell junction (GO:0005911);cytoplasm (GO:0005737);cytoplasmic side of plasma membrane (GO:0009898);cytosol (GO:0005829);endoplasmic reticulum (GO:0005783);endoplasmic reticulum membrane (GO:0005789);extracellular exosome (G…	3D-structure;Alternative splicing;Cell junction;Cell membrane;Complete proteome;Endoplasmic reticulum;Host-virus interaction;Membrane;Phosphoprotein;Polymorphism;Postsynaptic cell membrane;Reference proteome;Repeat;SH3 domain;Synapse.;		0.115947	1.09313	0.907313	1	66	48	57	DLG1
Locus_10165_Transcript_7/8_Confidence_0.526_Length_3091	3091	Locus_10165_Transcript_7/8_Confidence_0.526_Length_3091	3091	Locus_10165_Transcript_7/8_Confidence_0.526_Length_3091	3091	Q12959	90.399	0	DLG1_HUMAN	Disks large homolog 1	hsa:1739	GO:0005605 \\ GO:0016323 \\ GO:0005923 \\ GO:0030054 \\ GO:0031253 \\ GO:0005911 \\ GO:0005737 \\ GO:0009898 \\ GO:0005829 \\ GO:0005783 \\ GO:0005789 \\ GO:0070062 \\ GO:0005794 \\ GO:0001772 \\ GO:0014704 \\ GO:0043219 \\ GO:0016328 \\ GO:0045121 \\ GO:0005874 \\ GO:0097025 \\ GO:0035748 \\ GO:0031594 \\ GO:0033268 \\ GO:0005634 \\ GO:0048471 \\ GO:0005886 \\ GO:0014069 \\ GO:0045211 \\ GO:0042…	actin filament organization (GO:0007015);activation of protein kinase activity (GO:0032147);amyloid precursor protein metabolic process (GO:0042982);astral microtubule organization (GO:0030953);axon guidance (GO:0007411);bicellular tight junction assembly (GO:0070830);branching involved in ureteric bud morphogenesis (GO:0001658);cellular protein complex localization (GO:0034629);cortical actin cy…	cytoskeletal protein binding (GO:0008092);guanylate kinase activity (GO:0004385);ion channel binding (GO:0044325);ionotropic glutamate receptor binding (GO:0035255);L27 domain binding (GO:0097016);mitogen-activated protein kinase kinase binding (GO:0031434);phosphatase binding (GO:0019902);phosphoprotein phosphatase activity (GO:0004721);potassium channel regulator activity (GO:0015459);protein C…	basal lamina (GO:0005605);basolateral plasma membrane (GO:0016323);bicellular tight junction (GO:0005923);cell junction (GO:0030054);cell projection membrane (GO:0031253);cell-cell junction (GO:0005911);cytoplasm (GO:0005737);cytoplasmic side of plasma membrane (GO:0009898);cytosol (GO:0005829);endoplasmic reticulum (GO:0005783);endoplasmic reticulum membrane (GO:0005789);extracellular exosome (G…	3D-structure;Alternative splicing;Cell junction;Cell membrane;Complete proteome;Endoplasmic reticulum;Host-virus interaction;Membrane;Phosphoprotein;Polymorphism;Postsynaptic cell membrane;Reference proteome;Repeat;SH3 domain;Synapse.;		-0.36671	1.17386	0.679088	1	59	60	59.5	DLG1
Locus_10165_Transcript_8/8_Confidence_0.579_Length_3125	3125	Locus_10165_Transcript_8/8_Confidence_0.579_Length_3125	3125	Locus_10165_Transcript_8/8_Confidence_0.579_Length_3125	3125	Q12959	91.324	0	DLG1_HUMAN	Disks large homolog 1	hsa:1739	GO:0005605 \\ GO:0016323 \\ GO:0005923 \\ GO:0030054 \\ GO:0031253 \\ GO:0005911 \\ GO:0005737 \\ GO:0009898 \\ GO:0005829 \\ GO:0005783 \\ GO:0005789 \\ GO:0070062 \\ GO:0005794 \\ GO:0001772 \\ GO:0014704 \\ GO:0043219 \\ GO:0016328 \\ GO:0045121 \\ GO:0005874 \\ GO:0097025 \\ GO:0035748 \\ GO:0031594 \\ GO:0033268 \\ GO:0005634 \\ GO:0048471 \\ GO:0005886 \\ GO:0014069 \\ GO:0045211 \\ GO:0042…	actin filament organization (GO:0007015);activation of protein kinase activity (GO:0032147);amyloid precursor protein metabolic process (GO:0042982);astral microtubule organization (GO:0030953);axon guidance (GO:0007411);bicellular tight junction assembly (GO:0070830);branching involved in ureteric bud morphogenesis (GO:0001658);cellular protein complex localization (GO:0034629);cortical actin cy…	cytoskeletal protein binding (GO:0008092);guanylate kinase activity (GO:0004385);ion channel binding (GO:0044325);ionotropic glutamate receptor binding (GO:0035255);L27 domain binding (GO:0097016);mitogen-activated protein kinase kinase binding (GO:0031434);phosphatase binding (GO:0019902);phosphoprotein phosphatase activity (GO:0004721);potassium channel regulator activity (GO:0015459);protein C…	basal lamina (GO:0005605);basolateral plasma membrane (GO:0016323);bicellular tight junction (GO:0005923);cell junction (GO:0030054);cell projection membrane (GO:0031253);cell-cell junction (GO:0005911);cytoplasm (GO:0005737);cytoplasmic side of plasma membrane (GO:0009898);cytosol (GO:0005829);endoplasmic reticulum (GO:0005783);endoplasmic reticulum membrane (GO:0005789);extracellular exosome (G…	3D-structure;Alternative splicing;Cell junction;Cell membrane;Complete proteome;Endoplasmic reticulum;Host-virus interaction;Membrane;Phosphoprotein;Polymorphism;Postsynaptic cell membrane;Reference proteome;Repeat;SH3 domain;Synapse.;		-0.123985	1.30839	0.900129	1	71	61	66	DLG1
Locus_10166_Transcript_2/3_Confidence_0.667_Length_2934	2934	Locus_10166_Transcript_2/3_Confidence_0.667_Length_2934	2934	Locus_10166_Transcript_2/3_Confidence_0.667_Length_2934	2934	Q9R097	54.658	7.7e-111	SPIT1_MOUSE	Kunitz-type protease inhibitor 1	mmu:20732	GO:0070062 \\ GO:0005615 \\ GO:0005886 \\ GO:0004867 \\ GO:0060670 \\ GO:0071773 \\ GO:0001892 \\ GO:0030198 \\ GO:2000178 \\ GO:0001843 \\ GO:0060674 \\ GO:0045687 \\	branching involved in labyrinthine layer morphogenesis (GO:0060670);cellular response to BMP stimulus (GO:0071773);embryonic placenta development (GO:0001892);extracellular matrix organization (GO:0030198);negative regulation of neural precursor cell proliferation (GO:2000178);neural tube closure (GO:0001843);placenta blood vessel development (GO:0060674);positive regulation of glial cell differe…	serine-type endopeptidase inhibitor activity (GO:0004867);	extracellular exosome (GO:0070062);extracellular space (GO:0005615);plasma membrane (GO:0005886);	Complete proteome;Disulfide bond;Glycoprotein;Protease inhibitor;Reference proteome;Repeat;Secreted;Serine protease inhibitor;Signal.;		0.0665954	2.57826	0.949631	1	186	140	163	SPIT1
Locus_10166_Transcript_3/3_Confidence_0.667_Length_3377	3377	Locus_10166_Transcript_3/3_Confidence_0.667_Length_3377	3377	Locus_10166_Transcript_3/3_Confidence_0.667_Length_3377	3377	Q9R097	51.037	9.06e-161	SPIT1_MOUSE	Kunitz-type protease inhibitor 1	mmu:20732	GO:0070062 \\ GO:0005615 \\ GO:0005886 \\ GO:0004867 \\ GO:0060670 \\ GO:0071773 \\ GO:0001892 \\ GO:0030198 \\ GO:2000178 \\ GO:0001843 \\ GO:0060674 \\ GO:0045687 \\	branching involved in labyrinthine layer morphogenesis (GO:0060670);cellular response to BMP stimulus (GO:0071773);embryonic placenta development (GO:0001892);extracellular matrix organization (GO:0030198);negative regulation of neural precursor cell proliferation (GO:2000178);neural tube closure (GO:0001843);placenta blood vessel development (GO:0060674);positive regulation of glial cell differe…	serine-type endopeptidase inhibitor activity (GO:0004867);	extracellular exosome (GO:0070062);extracellular space (GO:0005615);plasma membrane (GO:0005886);	Complete proteome;Disulfide bond;Glycoprotein;Protease inhibitor;Reference proteome;Repeat;Secreted;Serine protease inhibitor;Signal.;		-0.322378	2.95725	0.708212	1	211	208	209.5	SPIT1
Locus_10167_Transcript_1/1_Confidence_1.000_Length_3087	3087	Locus_10167_Transcript_1/1_Confidence_1.000_Length_3087	3087	Locus_10167_Transcript_1/1_Confidence_1.000_Length_3087	3087	Q9WUR9	78.924	6.5e-123	KAD4_MOUSE	Adenylate kinase 4, mitochondrial {ECO:0000255|HAMAP-Rule:MF_03170}	mmu:11639	GO:0070062 \\ GO:0005759 \\ GO:0005739 \\ GO:0004017 \\ GO:0005524 \\ GO:0005525 \\ GO:0004550 \\ GO:0046899 \\ GO:0006172 \\ GO:0046033 \\ GO:0046034 \\ GO:0007420 \\ GO:0046039 \\ GO:0001889 \\ GO:0006165 \\ GO:0009142 \\ GO:0042493 \\	ADP biosynthetic process (GO:0006172);AMP metabolic process (GO:0046033);ATP metabolic process (GO:0046034);brain development (GO:0007420);GTP metabolic process (GO:0046039);liver development (GO:0001889);nucleoside diphosphate phosphorylation (GO:0006165);nucleoside triphosphate biosynthetic process (GO:0009142);response to drug (GO:0042493);	adenylate kinase activity (GO:0004017);ATP binding (GO:0005524);GTP binding (GO:0005525);nucleoside diphosphate kinase activity (GO:0004550);nucleoside triphosphate adenylate kinase activity (GO:0046899);	extracellular exosome (GO:0070062);mitochondrial matrix (GO:0005759);mitochondrion (GO:0005739);	Acetylation;ATP-binding;Complete proteome;GTP-binding;Kinase;Mitochondrion;Nucleotide-binding;Reference proteome;Transferase.;		-1.55826	6.08049	0.0678944	1	1057	2454	1755.5	KAD4
Locus_10168_Transcript_2/4_Confidence_0.700_Length_5382	5382	Locus_10168_Transcript_2/4_Confidence_0.700_Length_5382	5382	Locus_10168_Transcript_2/4_Confidence_0.700_Length_5382	5382	O94986	43.851	0	CE152_HUMAN	Centrosomal protein of 152 kDa	hsa:22995	GO:0005814 \\ GO:0005813 \\ GO:0005829 \\ GO:0098536 \\ GO:0005654 \\ GO:0000242 \\ GO:0019901 \\ GO:0030030 \\ GO:0007099 \\ GO:0051298 \\ GO:0098535 \\ GO:0000086 \\ GO:0000278 \\ GO:0006996 \\	cell projection organization (GO:0030030);centriole replication (GO:0007099);centrosome duplication (GO:0051298);de novo centriole assembly (GO:0098535);G2/M transition of mitotic cell cycle (GO:0000086);mitotic cell cycle (GO:0000278);organelle organization (GO:0006996);	protein kinase binding (GO:0019901);	centriole (GO:0005814);centrosome (GO:0005813);cytosol (GO:0005829);deuterosome (GO:0098536);nucleoplasm (GO:0005654);pericentriolar material (GO:0000242);	3D-structure;Alternative splicing;Cilium biogenesis/degradation;Coiled coil;Complete proteome;Cytoplasm;Cytoskeleton;Disease mutation;Dwarfism;Mental retardation;Polymorphism;Primary microcephaly;Reference proteome.;		0.715471	0.419287	0.454454	1	48	23	35.5	CE152
Locus_10168_Transcript_3/4_Confidence_0.200_Length_2221	2221	Locus_10168_Transcript_3/4_Confidence_0.200_Length_2221	2221	Locus_10168_Transcript_3/4_Confidence_0.200_Length_2221	2221	O94986	70.968	1.58e-28	CE152_HUMAN	Centrosomal protein of 152 kDa	hsa:22995	GO:0005814 \\ GO:0005813 \\ GO:0005829 \\ GO:0098536 \\ GO:0005654 \\ GO:0000242 \\ GO:0019901 \\ GO:0030030 \\ GO:0007099 \\ GO:0051298 \\ GO:0098535 \\ GO:0000086 \\ GO:0000278 \\ GO:0006996 \\	cell projection organization (GO:0030030);centriole replication (GO:0007099);centrosome duplication (GO:0051298);de novo centriole assembly (GO:0098535);G2/M transition of mitotic cell cycle (GO:0000086);mitotic cell cycle (GO:0000278);organelle organization (GO:0006996);	protein kinase binding (GO:0019901);	centriole (GO:0005814);centrosome (GO:0005813);cytosol (GO:0005829);deuterosome (GO:0098536);nucleoplasm (GO:0005654);pericentriolar material (GO:0000242);	3D-structure;Alternative splicing;Cilium biogenesis/degradation;Coiled coil;Complete proteome;Cytoplasm;Cytoskeleton;Disease mutation;Dwarfism;Mental retardation;Polymorphism;Primary microcephaly;Reference proteome.;		0.331582	-0.884873	0.820975	1	16	10	13	CE152
Locus_10169_Transcript_3/4_Confidence_0.250_Length_787	787	No_sig_nr_hit	No_sig_nr_hit	No_sig_nr_hit	No_sig_nr_hit	No_Uniprotmatch	No_%_identity	No_evalue	No_ID	No_Description	No_KEGG	No_GO	No_GOCC	No_GOBP	No_GOMF	No_keywords		-0.101171	-0.975113	1	1	13	11	12	No
Locus_10169_Transcript_4/4_Confidence_0.625_Length_2391	2391	Locus_10169_Transcript_4/4_Confidence_0.625_Length_2391	2391	Locus_10169_Transcript_4/4_Confidence_0.625_Length_2391	2391	Q9BYH8	70.335	0	IKBZ_HUMAN	NF-kappa-B inhibitor zeta	hsa:64332	GO:0005634 \\ GO:0003712 \\ GO:0006954 \\ GO:0006357 \\ GO:0006351 \\	inflammatory response (GO:0006954);regulation of transcription from RNA polymerase II promoter (GO:0006357);transcription, DNA-templated (GO:0006351);	transcription cofactor activity (GO:0003712);	nucleus (GO:0005634);	Activator;Alternative splicing;ANK repeat;Complete proteome;Nucleus;Polymorphism;Reference proteome;Repeat;Repressor;Transcription;Transcription regulation.;		-0.154366	0.806569	0.886385	1	49	43	46	IKBZ
Locus_1017_Transcript_10/12_Confidence_0.288_Length_5121	5121	Locus_1017_Transcript_10/12_Confidence_0.288_Length_5121	5121	Locus_1017_Transcript_10/12_Confidence_0.288_Length_5121	5121	Q9HCN8	80.392	7.06e-69	SDF2L_HUMAN	Stromal cell-derived factor 2-like protein 1	hsa:23753	GO:0031502 \\ GO:0034663 \\ GO:0005788 \\ GO:0000032 \\ GO:0044845 \\ GO:0071712 \\ GO:0007275 \\ GO:0035269 \\ GO:0042981 \\ GO:1900101 \\	cell wall mannoprotein biosynthetic process (GO:0000032);chain elongation of O-linked mannose residue (GO:0044845);ER-associated misfolded protein catabolic process (GO:0071712);multicellular organismal development (GO:0007275);protein O-linked mannosylation (GO:0035269);regulation of apoptotic process (GO:0042981);regulation of endoplasmic reticulum unfolded protein response (GO:1900101);	No_GOMF	dolichyl-phosphate-mannose-protein mannosyltransferase complex (GO:0031502);endoplasmic reticulum chaperone complex (GO:0034663);endoplasmic reticulum lumen (GO:0005788);	Complete proteome;Endoplasmic reticulum;Reference proteome;Repeat;Signal.;		-0.48806	4.26553	0.563116	1	492	544	518	SDF2L
Locus_1017_Transcript_5/12_Confidence_0.212_Length_4171	4171	Locus_1017_Transcript_5/12_Confidence_0.212_Length_4171	4171	Locus_1017_Transcript_5/12_Confidence_0.212_Length_4171	4171	Q9HCN8	80.392	5.26e-69	SDF2L_HUMAN	Stromal cell-derived factor 2-like protein 1	hsa:23753	GO:0031502 \\ GO:0034663 \\ GO:0005788 \\ GO:0000032 \\ GO:0044845 \\ GO:0071712 \\ GO:0007275 \\ GO:0035269 \\ GO:0042981 \\ GO:1900101 \\	cell wall mannoprotein biosynthetic process (GO:0000032);chain elongation of O-linked mannose residue (GO:0044845);ER-associated misfolded protein catabolic process (GO:0071712);multicellular organismal development (GO:0007275);protein O-linked mannosylation (GO:0035269);regulation of apoptotic process (GO:0042981);regulation of endoplasmic reticulum unfolded protein response (GO:1900101);	No_GOMF	dolichyl-phosphate-mannose-protein mannosyltransferase complex (GO:0031502);endoplasmic reticulum chaperone complex (GO:0034663);endoplasmic reticulum lumen (GO:0005788);	Complete proteome;Endoplasmic reticulum;Reference proteome;Repeat;Signal.;		-0.300912	4.41873	0.722286	1	589	572	580.5	SDF2L
Locus_1017_Transcript_6/12_Confidence_0.115_Length_4009	4009	Locus_1017_Transcript_6/12_Confidence_0.115_Length_4009	4009	Locus_1017_Transcript_6/12_Confidence_0.115_Length_4009	4009	Q9HCN8	75.706	1.75e-74	SDF2L_HUMAN	Stromal cell-derived factor 2-like protein 1	hsa:23753	GO:0031502 \\ GO:0034663 \\ GO:0005788 \\ GO:0000032 \\ GO:0044845 \\ GO:0071712 \\ GO:0007275 \\ GO:0035269 \\ GO:0042981 \\ GO:1900101 \\	cell wall mannoprotein biosynthetic process (GO:0000032);chain elongation of O-linked mannose residue (GO:0044845);ER-associated misfolded protein catabolic process (GO:0071712);multicellular organismal development (GO:0007275);protein O-linked mannosylation (GO:0035269);regulation of apoptotic process (GO:0042981);regulation of endoplasmic reticulum unfolded protein response (GO:1900101);	No_GOMF	dolichyl-phosphate-mannose-protein mannosyltransferase complex (GO:0031502);endoplasmic reticulum chaperone complex (GO:0034663);endoplasmic reticulum lumen (GO:0005788);	Complete proteome;Endoplasmic reticulum;Reference proteome;Repeat;Signal.;		-0.256789	4.3849	0.759628	1	585	551	568	SDF2L
Locus_1017_Transcript_8/12_Confidence_0.327_Length_3328	3328	Locus_1017_Transcript_8/12_Confidence_0.327_Length_3328	3328	Locus_1017_Transcript_8/12_Confidence_0.327_Length_3328	3328	Q569M2	62.046	9.54e-124	YDJC_XENLA	Carbohydrate deacetylase {ECO:0000250|UniProtKB:Q53WD3}	xla:734411	GO:0016810 \\ GO:0000287 \\ GO:0005975 \\	carbohydrate metabolic process (GO:0005975);	hydrolase activity, acting on carbon-nitrogen (but not peptide) bonds (GO:0016810);magnesium ion binding (GO:0000287);	No_GOCC	Carbohydrate metabolism;Hydrolase;Magnesium;Metal-binding.;		-1.48751	5.06256	0.081468	1	541	1196	868.5	YDJC
Locus_1017_Transcript_9/12_Confidence_0.365_Length_5754	5754	Locus_1017_Transcript_9/12_Confidence_0.365_Length_5754	5754	Locus_1017_Transcript_9/12_Confidence_0.365_Length_5754	5754	Q569M2	62.046	1.32e-120	YDJC_XENLA	Carbohydrate deacetylase {ECO:0000250|UniProtKB:Q53WD3}	xla:734411	GO:0016810 \\ GO:0000287 \\ GO:0005975 \\	carbohydrate metabolic process (GO:0005975);	hydrolase activity, acting on carbon-nitrogen (but not peptide) bonds (GO:0016810);magnesium ion binding (GO:0000287);	No_GOCC	Carbohydrate metabolism;Hydrolase;Magnesium;Metal-binding.;		-1.03721	5.57661	0.219176	1	963	1558	1260.5	YDJC
Locus_10170_Transcript_10/10_Confidence_0.520_Length_836	836	Locus_10170_Transcript_10/10_Confidence_0.520_Length_836	836	Locus_10170_Transcript_10/10_Confidence_0.520_Length_836	836	Q9DAA6	82.292	3.5e-115	EXOS1_MOUSE	Exosome complex component CSL4	mmu:66583	GO:0005737 \\ GO:0000178 \\ GO:0000176 \\ GO:0005730 \\ GO:0005654 \\ GO:0005634 \\ GO:0003723 \\ GO:0006396 \\ GO:0006364 \\	RNA processing (GO:0006396);rRNA processing (GO:0006364);	RNA binding (GO:0003723);	cytoplasm (GO:0005737);exosome (RNase complex) (GO:0000178);nuclear exosome (RNase complex) (GO:0000176);nucleolus (GO:0005730);nucleoplasm (GO:0005654);nucleus (GO:0005634);	Alternative splicing;Complete proteome;Cytoplasm;Exosome;Nucleus;Phosphoprotein;Reference proteome;RNA-binding;rRNA processing.;		-0.370884	0.945036	0.696822	1	50	51	50.5	EXOS1
Locus_10170_Transcript_2/10_Confidence_0.440_Length_761	761	Locus_10170_Transcript_2/10_Confidence_0.440_Length_761	761	Locus_10170_Transcript_2/10_Confidence_0.440_Length_761	761	Q9DAA6	71.875	2.62e-94	EXOS1_MOUSE	Exosome complex component CSL4	mmu:66583	GO:0005737 \\ GO:0000178 \\ GO:0000176 \\ GO:0005730 \\ GO:0005654 \\ GO:0005634 \\ GO:0003723 \\ GO:0006396 \\ GO:0006364 \\	RNA processing (GO:0006396);rRNA processing (GO:0006364);	RNA binding (GO:0003723);	cytoplasm (GO:0005737);exosome (RNase complex) (GO:0000178);nuclear exosome (RNase complex) (GO:0000176);nucleolus (GO:0005730);nucleoplasm (GO:0005654);nucleus (GO:0005634);	Alternative splicing;Complete proteome;Cytoplasm;Exosome;Nucleus;Phosphoprotein;Reference proteome;RNA-binding;rRNA processing.;		0.148139	0.549718	0.899108	1	45	32	38.5	EXOS1
Locus_10170_Transcript_3/10_Confidence_0.520_Length_785	785	Locus_10170_Transcript_3/10_Confidence_0.520_Length_785	785	Locus_10170_Transcript_3/10_Confidence_0.520_Length_785	785	Q9DAA6	74.479	5.43e-99	EXOS1_MOUSE	Exosome complex component CSL4	mmu:66583	GO:0005737 \\ GO:0000178 \\ GO:0000176 \\ GO:0005730 \\ GO:0005654 \\ GO:0005634 \\ GO:0003723 \\ GO:0006396 \\ GO:0006364 \\	RNA processing (GO:0006396);rRNA processing (GO:0006364);	RNA binding (GO:0003723);	cytoplasm (GO:0005737);exosome (RNase complex) (GO:0000178);nuclear exosome (RNase complex) (GO:0000176);nucleolus (GO:0005730);nucleoplasm (GO:0005654);nucleus (GO:0005634);	Alternative splicing;Complete proteome;Cytoplasm;Exosome;Nucleus;Phosphoprotein;Reference proteome;RNA-binding;rRNA processing.;		-0.414089	0.623646	0.689528	1	39	41	40	EXOS1
Locus_10170_Transcript_4/10_Confidence_0.480_Length_910	910	Locus_10170_Transcript_4/10_Confidence_0.480_Length_910	910	Locus_10170_Transcript_4/10_Confidence_0.480_Length_910	910	Q9DAA6	75.893	2.08e-81	EXOS1_MOUSE	Exosome complex component CSL4	mmu:66583	GO:0005737 \\ GO:0000178 \\ GO:0000176 \\ GO:0005730 \\ GO:0005654 \\ GO:0005634 \\ GO:0003723 \\ GO:0006396 \\ GO:0006364 \\	RNA processing (GO:0006396);rRNA processing (GO:0006364);	RNA binding (GO:0003723);	cytoplasm (GO:0005737);exosome (RNase complex) (GO:0000178);nuclear exosome (RNase complex) (GO:0000176);nucleolus (GO:0005730);nucleoplasm (GO:0005654);nucleus (GO:0005634);	Alternative splicing;Complete proteome;Cytoplasm;Exosome;Nucleus;Phosphoprotein;Reference proteome;RNA-binding;rRNA processing.;		0.123513	0.62009	0.90379	1	47	34	40.5	EXOS1
Locus_10170_Transcript_5/10_Confidence_0.400_Length_761	761	Locus_10170_Transcript_5/10_Confidence_0.400_Length_761	761	Locus_10170_Transcript_5/10_Confidence_0.400_Length_761	761	Q9DAA6	90.164	9.75e-76	EXOS1_MOUSE	Exosome complex component CSL4	mmu:66583	GO:0005737 \\ GO:0000178 \\ GO:0000176 \\ GO:0005730 \\ GO:0005654 \\ GO:0005634 \\ GO:0003723 \\ GO:0006396 \\ GO:0006364 \\	RNA processing (GO:0006396);rRNA processing (GO:0006364);	RNA binding (GO:0003723);	cytoplasm (GO:0005737);exosome (RNase complex) (GO:0000178);nuclear exosome (RNase complex) (GO:0000176);nucleolus (GO:0005730);nucleoplasm (GO:0005654);nucleus (GO:0005634);	Alternative splicing;Complete proteome;Cytoplasm;Exosome;Nucleus;Phosphoprotein;Reference proteome;RNA-binding;rRNA processing.;		-0.268373	0.583172	0.772434	1	40	38	39	EXOS1
Locus_10170_Transcript_7/10_Confidence_0.520_Length_976	976	Locus_10170_Transcript_7/10_Confidence_0.520_Length_976	976	Locus_10170_Transcript_7/10_Confidence_0.520_Length_976	976	Q9DAA6	75	1.24e-86	EXOS1_MOUSE	Exosome complex component CSL4	mmu:66583	GO:0005737 \\ GO:0000178 \\ GO:0000176 \\ GO:0005730 \\ GO:0005654 \\ GO:0005634 \\ GO:0003723 \\ GO:0006396 \\ GO:0006364 \\	RNA processing (GO:0006396);rRNA processing (GO:0006364);	RNA binding (GO:0003723);	cytoplasm (GO:0005737);exosome (RNase complex) (GO:0000178);nuclear exosome (RNase complex) (GO:0000176);nucleolus (GO:0005730);nucleoplasm (GO:0005654);nucleus (GO:0005634);	Alternative splicing;Complete proteome;Cytoplasm;Exosome;Nucleus;Phosphoprotein;Reference proteome;RNA-binding;rRNA processing.;		0.392765	0.954294	0.675673	1	65	39	52	EXOS1
Locus_10170_Transcript_9/10_Confidence_0.200_Length_569	569	Locus_10170_Transcript_9/10_Confidence_0.200_Length_569	569	Locus_10170_Transcript_9/10_Confidence_0.200_Length_569	569	Q9DAA6	90.123	2.7e-47	EXOS1_MOUSE	Exosome complex component CSL4	mmu:66583	GO:0005737 \\ GO:0000178 \\ GO:0000176 \\ GO:0005730 \\ GO:0005654 \\ GO:0005634 \\ GO:0003723 \\ GO:0006396 \\ GO:0006364 \\	RNA processing (GO:0006396);rRNA processing (GO:0006364);	RNA binding (GO:0003723);	cytoplasm (GO:0005737);exosome (RNase complex) (GO:0000178);nuclear exosome (RNase complex) (GO:0000176);nucleolus (GO:0005730);nucleoplasm (GO:0005654);nucleus (GO:0005634);	Alternative splicing;Complete proteome;Cytoplasm;Exosome;Nucleus;Phosphoprotein;Reference proteome;RNA-binding;rRNA processing.;		0.844393	-0.16477	0.438951	1	32	14	23	EXOS1
Locus_101710_Transcript_1/1_Confidence_1.000_Length_271	271	No_sig_nr_hit	No_sig_nr_hit	No_sig_nr_hit	No_sig_nr_hit	No_Uniprotmatch	No_%_identity	No_evalue	No_ID	No_Description	No_KEGG	No_GO	No_GOCC	No_GOBP	No_GOMF	No_keywords		0.0711707	-0.786229	1	1	16	12	14	No
Locus_10172_Transcript_2/3_Confidence_0.714_Length_5526	5526	Locus_10172_Transcript_2/3_Confidence_0.714_Length_5526	5526	Locus_10172_Transcript_2/3_Confidence_0.714_Length_5526	5526	O60346	88.446	0	PHLP1_HUMAN	PH domain leucine-rich repeat-containing protein phosphatase 1	hsa:23239	GO:0005829 \\ GO:0005634 \\ GO:0005886 \\ GO:0046872 \\ GO:0004721 \\ GO:0006915 \\ GO:0009649 \\ GO:0007173 \\ GO:0038095 \\ GO:0008543 \\ GO:0045087 \\ GO:0051898 \\ GO:0048011 \\ GO:0048015 \\ GO:0042981 \\ GO:0046328 \\ GO:0043408 \\ GO:1900744 \\ GO:0002667 \\	apoptotic process (GO:0006915);entrainment of circadian clock (GO:0009649);epidermal growth factor receptor signaling pathway (GO:0007173);Fc-epsilon receptor signaling pathway (GO:0038095);fibroblast growth factor receptor signaling pathway (GO:0008543);innate immune response (GO:0045087);negative regulation of protein kinase B signaling (GO:0051898);neurotrophin TRK receptor signaling pathway (…	metal ion binding (GO:0046872);phosphoprotein phosphatase activity (GO:0004721);	cytosol (GO:0005829);nucleus (GO:0005634);plasma membrane (GO:0005886);	Acetylation;Alternative splicing;Apoptosis;Cell membrane;Complete proteome;Cytoplasm;Hydrolase;Leucine-rich repeat;Manganese;Membrane;Metal-binding;Nucleus;Polymorphism;Protein phosphatase;Reference proteome;Repeat;Tumor suppressor.;		0.48829	3.4417	0.566918	1	388	218	303	PHLP1
Locus_10174_Transcript_1/6_Confidence_0.538_Length_3296	3296	Locus_10174_Transcript_1/6_Confidence_0.538_Length_3296	3296	Locus_10174_Transcript_1/6_Confidence_0.538_Length_3296	3296	P63149	100	3.73e-99	UBE2B_RAT	Ubiquitin-conjugating enzyme E2 B	rno:81816	GO:0005737 \\ GO:0033503 \\ GO:0000790 \\ GO:0005886 \\ GO:0005524 \\ GO:0061630 \\ GO:0031625 \\ GO:0004842 \\ GO:0032869 \\ GO:0006281 \\ GO:0016574 \\ GO:0043161 \\ GO:0070979 \\ GO:0070936 \\ GO:0070534 \\ GO:0000209 \\ GO:0001666 \\ GO:0006511 \\	cellular response to insulin stimulus (GO:0032869);DNA repair (GO:0006281);histone ubiquitination (GO:0016574);proteasome-mediated ubiquitin-dependent protein catabolic process (GO:0043161);protein K11-linked ubiquitination (GO:0070979);protein K48-linked ubiquitination (GO:0070936);protein K63-linked ubiquitination (GO:0070534);protein polyubiquitination (GO:0000209);response to hypoxia (GO:0001…	ATP binding (GO:0005524);ubiquitin protein ligase activity (GO:0061630);ubiquitin protein ligase binding (GO:0031625);ubiquitin-protein transferase activity (GO:0004842);	cytoplasm (GO:0005737);HULC complex (GO:0033503);nuclear chromatin (GO:0000790);plasma membrane (GO:0005886);	ATP-binding;Cell membrane;Complete proteome;DNA damage;DNA repair;Membrane;Nucleotide-binding;Nucleus;Reference proteome;Transferase;Ubl conjugation pathway.;		-0.0839023	4.18162	0.922313	1	541	452	496.5	UBE2B
Locus_10174_Transcript_4/6_Confidence_0.308_Length_956	956	Locus_10174_Transcript_4/6_Confidence_0.308_Length_956	956	Locus_10174_Transcript_4/6_Confidence_0.308_Length_956	956	P63149	98.23	8.3e-76	UBE2B_RAT	Ubiquitin-conjugating enzyme E2 B	rno:81816	GO:0005737 \\ GO:0033503 \\ GO:0000790 \\ GO:0005886 \\ GO:0005524 \\ GO:0061630 \\ GO:0031625 \\ GO:0004842 \\ GO:0032869 \\ GO:0006281 \\ GO:0016574 \\ GO:0043161 \\ GO:0070979 \\ GO:0070936 \\ GO:0070534 \\ GO:0000209 \\ GO:0001666 \\ GO:0006511 \\	cellular response to insulin stimulus (GO:0032869);DNA repair (GO:0006281);histone ubiquitination (GO:0016574);proteasome-mediated ubiquitin-dependent protein catabolic process (GO:0043161);protein K11-linked ubiquitination (GO:0070979);protein K48-linked ubiquitination (GO:0070936);protein K63-linked ubiquitination (GO:0070534);protein polyubiquitination (GO:0000209);response to hypoxia (GO:0001…	ATP binding (GO:0005524);ubiquitin protein ligase activity (GO:0061630);ubiquitin protein ligase binding (GO:0031625);ubiquitin-protein transferase activity (GO:0004842);	cytoplasm (GO:0005737);HULC complex (GO:0033503);nuclear chromatin (GO:0000790);plasma membrane (GO:0005886);	ATP-binding;Cell membrane;Complete proteome;DNA damage;DNA repair;Membrane;Nucleotide-binding;Nucleus;Reference proteome;Transferase;Ubl conjugation pathway.;		-0.376864	0.673025	0.696209	1	41	42	41.5	UBE2B
Locus_10174_Transcript_5/6_Confidence_0.462_Length_3612	3612	Locus_10174_Transcript_5/6_Confidence_0.462_Length_3612	3612	Locus_10174_Transcript_5/6_Confidence_0.462_Length_3612	3612	P63149	87.209	1.34e-38	UBE2B_RAT	Ubiquitin-conjugating enzyme E2 B	rno:81816	GO:0005737 \\ GO:0033503 \\ GO:0000790 \\ GO:0005886 \\ GO:0005524 \\ GO:0061630 \\ GO:0031625 \\ GO:0004842 \\ GO:0032869 \\ GO:0006281 \\ GO:0016574 \\ GO:0043161 \\ GO:0070979 \\ GO:0070936 \\ GO:0070534 \\ GO:0000209 \\ GO:0001666 \\ GO:0006511 \\	cellular response to insulin stimulus (GO:0032869);DNA repair (GO:0006281);histone ubiquitination (GO:0016574);proteasome-mediated ubiquitin-dependent protein catabolic process (GO:0043161);protein K11-linked ubiquitination (GO:0070979);protein K48-linked ubiquitination (GO:0070936);protein K63-linked ubiquitination (GO:0070534);protein polyubiquitination (GO:0000209);response to hypoxia (GO:0001…	ATP binding (GO:0005524);ubiquitin protein ligase activity (GO:0061630);ubiquitin protein ligase binding (GO:0031625);ubiquitin-protein transferase activity (GO:0004842);	cytoplasm (GO:0005737);HULC complex (GO:0033503);nuclear chromatin (GO:0000790);plasma membrane (GO:0005886);	ATP-binding;Cell membrane;Complete proteome;DNA damage;DNA repair;Membrane;Nucleotide-binding;Nucleus;Reference proteome;Transferase;Ubl conjugation pathway.;		0.326396	3.92178	0.700414	1	517	325	421	UBE2B
Locus_10175_Transcript_1/2_Confidence_0.750_Length_2985	2985	Locus_10175_Transcript_1/2_Confidence_0.750_Length_2985	2985	Locus_10175_Transcript_1/2_Confidence_0.750_Length_2985	2985	P32250	93.399	0	LPAR6_CHICK	Lysophosphatidic acid receptor 6	No_KEGG	GO:0016021 \\ GO:0005886 \\ GO:0004930 \\	No_GOBP	G-protein coupled receptor activity (GO:0004930);	integral component of membrane (GO:0016021);plasma membrane (GO:0005886);	Cell membrane;Complete proteome;Disulfide bond;G-protein coupled receptor;Glycoprotein;Lipoprotein;Membrane;Palmitate;Receptor;Reference proteome;Transducer;Transmembrane;Transmembrane helix.;		0.562166	5.11439	0.503527	1	1270	678	974	LPAR6
Locus_10175_Transcript_2/2_Confidence_0.750_Length_2873	2873	Locus_10175_Transcript_2/2_Confidence_0.750_Length_2873	2873	Locus_10175_Transcript_2/2_Confidence_0.750_Length_2873	2873	P32250	93.399	0	LPAR6_CHICK	Lysophosphatidic acid receptor 6	No_KEGG	GO:0016021 \\ GO:0005886 \\ GO:0004930 \\	No_GOBP	G-protein coupled receptor activity (GO:0004930);	integral component of membrane (GO:0016021);plasma membrane (GO:0005886);	Cell membrane;Complete proteome;Disulfide bond;G-protein coupled receptor;Glycoprotein;Lipoprotein;Membrane;Palmitate;Receptor;Reference proteome;Transducer;Transmembrane;Transmembrane helix.;		0.510847	5.02334	0.54331	1	1175	650	912.5	LPAR6
Locus_10176_Transcript_2/8_Confidence_0.182_Length_1424	1424	Locus_10176_Transcript_2/8_Confidence_0.182_Length_1424	1424	Locus_10176_Transcript_2/8_Confidence_0.182_Length_1424	1424	P29350	81.734	0	PTN6_HUMAN	Tyrosine-protein phosphatase non-receptor type 6	hsa:5777	GO:0042105 \\ GO:0005911 \\ GO:0005737 \\ GO:0005829 \\ GO:0070062 \\ GO:0016020 \\ GO:0005730 \\ GO:0005634 \\ GO:0019901 \\ GO:0004725 \\ GO:0005001 \\ GO:0033277 \\ GO:0006915 \\ GO:0050853 \\ GO:0007596 \\ GO:0030154 \\ GO:0008283 \\ GO:0019221 \\ GO:0007186 \\ GO:0060333 \\ GO:0060397 \\ GO:0050900 \\ GO:0035855 \\ GO:0042267 \\ GO:0050859 \\ GO:0008285 \\ GO:0002924 \\ GO:0043407 \\ GO:0050…	abortive mitotic cell cycle (GO:0033277);apoptotic process (GO:0006915);B cell receptor signaling pathway (GO:0050853);blood coagulation (GO:0007596);cell differentiation (GO:0030154);cell proliferation (GO:0008283);cytokine-mediated signaling pathway (GO:0019221);G-protein coupled receptor signaling pathway (GO:0007186);interferon-gamma-mediated signaling pathway (GO:0060333);JAK-STAT cascade in…	protein kinase binding (GO:0019901);protein tyrosine phosphatase activity (GO:0004725);transmembrane receptor protein tyrosine phosphatase activity (GO:0005001);	alpha-beta T cell receptor complex (GO:0042105);cell-cell junction (GO:0005911);cytoplasm (GO:0005737);cytosol (GO:0005829);extracellular exosome (GO:0070062);membrane (GO:0016020);nucleolus (GO:0005730);nucleus (GO:0005634);	3D-structure;Alternative splicing;Complete proteome;Cytoplasm;Hydrolase;Nucleus;Phosphoprotein;Protein phosphatase;Reference proteome;Repeat;SH2 domain.;		-1.1884	1.12304	0.185289	1	40	72	56	PTN6
Locus_10176_Transcript_3/8_Confidence_0.636_Length_2722	2722	Locus_10176_Transcript_3/8_Confidence_0.636_Length_2722	2722	Locus_10176_Transcript_3/8_Confidence_0.636_Length_2722	2722	P29350	81.436	0	PTN6_HUMAN	Tyrosine-protein phosphatase non-receptor type 6	hsa:5777	GO:0042105 \\ GO:0005911 \\ GO:0005737 \\ GO:0005829 \\ GO:0070062 \\ GO:0016020 \\ GO:0005730 \\ GO:0005634 \\ GO:0019901 \\ GO:0004725 \\ GO:0005001 \\ GO:0033277 \\ GO:0006915 \\ GO:0050853 \\ GO:0007596 \\ GO:0030154 \\ GO:0008283 \\ GO:0019221 \\ GO:0007186 \\ GO:0060333 \\ GO:0060397 \\ GO:0050900 \\ GO:0035855 \\ GO:0042267 \\ GO:0050859 \\ GO:0008285 \\ GO:0002924 \\ GO:0043407 \\ GO:0050…	abortive mitotic cell cycle (GO:0033277);apoptotic process (GO:0006915);B cell receptor signaling pathway (GO:0050853);blood coagulation (GO:0007596);cell differentiation (GO:0030154);cell proliferation (GO:0008283);cytokine-mediated signaling pathway (GO:0019221);G-protein coupled receptor signaling pathway (GO:0007186);interferon-gamma-mediated signaling pathway (GO:0060333);JAK-STAT cascade in…	protein kinase binding (GO:0019901);protein tyrosine phosphatase activity (GO:0004725);transmembrane receptor protein tyrosine phosphatase activity (GO:0005001);	alpha-beta T cell receptor complex (GO:0042105);cell-cell junction (GO:0005911);cytoplasm (GO:0005737);cytosol (GO:0005829);extracellular exosome (GO:0070062);membrane (GO:0016020);nucleolus (GO:0005730);nucleus (GO:0005634);	3D-structure;Alternative splicing;Complete proteome;Cytoplasm;Hydrolase;Nucleus;Phosphoprotein;Protein phosphatase;Reference proteome;Repeat;SH2 domain.;		-0.273901	2.63066	0.753062	1	171	163	167	PTN6
Locus_10176_Transcript_4/8_Confidence_0.591_Length_2088	2088	Locus_10176_Transcript_4/8_Confidence_0.591_Length_2088	2088	Locus_10176_Transcript_4/8_Confidence_0.591_Length_2088	2088	P29350	80.387	0	PTN6_HUMAN	Tyrosine-protein phosphatase non-receptor type 6	hsa:5777	GO:0042105 \\ GO:0005911 \\ GO:0005737 \\ GO:0005829 \\ GO:0070062 \\ GO:0016020 \\ GO:0005730 \\ GO:0005634 \\ GO:0019901 \\ GO:0004725 \\ GO:0005001 \\ GO:0033277 \\ GO:0006915 \\ GO:0050853 \\ GO:0007596 \\ GO:0030154 \\ GO:0008283 \\ GO:0019221 \\ GO:0007186 \\ GO:0060333 \\ GO:0060397 \\ GO:0050900 \\ GO:0035855 \\ GO:0042267 \\ GO:0050859 \\ GO:0008285 \\ GO:0002924 \\ GO:0043407 \\ GO:0050…	abortive mitotic cell cycle (GO:0033277);apoptotic process (GO:0006915);B cell receptor signaling pathway (GO:0050853);blood coagulation (GO:0007596);cell differentiation (GO:0030154);cell proliferation (GO:0008283);cytokine-mediated signaling pathway (GO:0019221);G-protein coupled receptor signaling pathway (GO:0007186);interferon-gamma-mediated signaling pathway (GO:0060333);JAK-STAT cascade in…	protein kinase binding (GO:0019901);protein tyrosine phosphatase activity (GO:0004725);transmembrane receptor protein tyrosine phosphatase activity (GO:0005001);	alpha-beta T cell receptor complex (GO:0042105);cell-cell junction (GO:0005911);cytoplasm (GO:0005737);cytosol (GO:0005829);extracellular exosome (GO:0070062);membrane (GO:0016020);nucleolus (GO:0005730);nucleus (GO:0005634);	3D-structure;Alternative splicing;Complete proteome;Cytoplasm;Hydrolase;Nucleus;Phosphoprotein;Protein phosphatase;Reference proteome;Repeat;SH2 domain.;		-0.073784	2.61587	0.94281	1	182	151	166.5	PTN6
Locus_10176_Transcript_5/8_Confidence_0.636_Length_2585	2585	Locus_10176_Transcript_5/8_Confidence_0.636_Length_2585	2585	Locus_10176_Transcript_5/8_Confidence_0.636_Length_2585	2585	P29350	80.438	0	PTN6_HUMAN	Tyrosine-protein phosphatase non-receptor type 6	hsa:5777	GO:0042105 \\ GO:0005911 \\ GO:0005737 \\ GO:0005829 \\ GO:0070062 \\ GO:0016020 \\ GO:0005730 \\ GO:0005634 \\ GO:0019901 \\ GO:0004725 \\ GO:0005001 \\ GO:0033277 \\ GO:0006915 \\ GO:0050853 \\ GO:0007596 \\ GO:0030154 \\ GO:0008283 \\ GO:0019221 \\ GO:0007186 \\ GO:0060333 \\ GO:0060397 \\ GO:0050900 \\ GO:0035855 \\ GO:0042267 \\ GO:0050859 \\ GO:0008285 \\ GO:0002924 \\ GO:0043407 \\ GO:0050…	abortive mitotic cell cycle (GO:0033277);apoptotic process (GO:0006915);B cell receptor signaling pathway (GO:0050853);blood coagulation (GO:0007596);cell differentiation (GO:0030154);cell proliferation (GO:0008283);cytokine-mediated signaling pathway (GO:0019221);G-protein coupled receptor signaling pathway (GO:0007186);interferon-gamma-mediated signaling pathway (GO:0060333);JAK-STAT cascade in…	protein kinase binding (GO:0019901);protein tyrosine phosphatase activity (GO:0004725);transmembrane receptor protein tyrosine phosphatase activity (GO:0005001);	alpha-beta T cell receptor complex (GO:0042105);cell-cell junction (GO:0005911);cytoplasm (GO:0005737);cytosol (GO:0005829);extracellular exosome (GO:0070062);membrane (GO:0016020);nucleolus (GO:0005730);nucleus (GO:0005634);	3D-structure;Alternative splicing;Complete proteome;Cytoplasm;Hydrolase;Nucleus;Phosphoprotein;Protein phosphatase;Reference proteome;Repeat;SH2 domain.;		-0.382497	2.76316	0.662092	1	180	185	182.5	PTN6
Locus_10176_Transcript_6/8_Confidence_0.636_Length_2897	2897	Locus_10176_Transcript_6/8_Confidence_0.636_Length_2897	2897	Locus_10176_Transcript_6/8_Confidence_0.636_Length_2897	2897	P29350	77.574	0	PTN6_HUMAN	Tyrosine-protein phosphatase non-receptor type 6	hsa:5777	GO:0042105 \\ GO:0005911 \\ GO:0005737 \\ GO:0005829 \\ GO:0070062 \\ GO:0016020 \\ GO:0005730 \\ GO:0005634 \\ GO:0019901 \\ GO:0004725 \\ GO:0005001 \\ GO:0033277 \\ GO:0006915 \\ GO:0050853 \\ GO:0007596 \\ GO:0030154 \\ GO:0008283 \\ GO:0019221 \\ GO:0007186 \\ GO:0060333 \\ GO:0060397 \\ GO:0050900 \\ GO:0035855 \\ GO:0042267 \\ GO:0050859 \\ GO:0008285 \\ GO:0002924 \\ GO:0043407 \\ GO:0050…	abortive mitotic cell cycle (GO:0033277);apoptotic process (GO:0006915);B cell receptor signaling pathway (GO:0050853);blood coagulation (GO:0007596);cell differentiation (GO:0030154);cell proliferation (GO:0008283);cytokine-mediated signaling pathway (GO:0019221);G-protein coupled receptor signaling pathway (GO:0007186);interferon-gamma-mediated signaling pathway (GO:0060333);JAK-STAT cascade in…	protein kinase binding (GO:0019901);protein tyrosine phosphatase activity (GO:0004725);transmembrane receptor protein tyrosine phosphatase activity (GO:0005001);	alpha-beta T cell receptor complex (GO:0042105);cell-cell junction (GO:0005911);cytoplasm (GO:0005737);cytosol (GO:0005829);extracellular exosome (GO:0070062);membrane (GO:0016020);nucleolus (GO:0005730);nucleus (GO:0005634);	3D-structure;Alternative splicing;Complete proteome;Cytoplasm;Hydrolase;Nucleus;Phosphoprotein;Protein phosphatase;Reference proteome;Repeat;SH2 domain.;		-0.138936	2.76193	0.874832	1	197	171	184	PTN6
Locus_10176_Transcript_7/8_Confidence_0.318_Length_1548	1548	Locus_10176_Transcript_7/8_Confidence_0.318_Length_1548	1548	Locus_10176_Transcript_7/8_Confidence_0.318_Length_1548	1548	P29350	75.221	7.61e-42	PTN6_HUMAN	Tyrosine-protein phosphatase non-receptor type 6	hsa:5777	GO:0042105 \\ GO:0005911 \\ GO:0005737 \\ GO:0005829 \\ GO:0070062 \\ GO:0016020 \\ GO:0005730 \\ GO:0005634 \\ GO:0019901 \\ GO:0004725 \\ GO:0005001 \\ GO:0033277 \\ GO:0006915 \\ GO:0050853 \\ GO:0007596 \\ GO:0030154 \\ GO:0008283 \\ GO:0019221 \\ GO:0007186 \\ GO:0060333 \\ GO:0060397 \\ GO:0050900 \\ GO:0035855 \\ GO:0042267 \\ GO:0050859 \\ GO:0008285 \\ GO:0002924 \\ GO:0043407 \\ GO:0050…	abortive mitotic cell cycle (GO:0033277);apoptotic process (GO:0006915);B cell receptor signaling pathway (GO:0050853);blood coagulation (GO:0007596);cell differentiation (GO:0030154);cell proliferation (GO:0008283);cytokine-mediated signaling pathway (GO:0019221);G-protein coupled receptor signaling pathway (GO:0007186);interferon-gamma-mediated signaling pathway (GO:0060333);JAK-STAT cascade in…	protein kinase binding (GO:0019901);protein tyrosine phosphatase activity (GO:0004725);transmembrane receptor protein tyrosine phosphatase activity (GO:0005001);	alpha-beta T cell receptor complex (GO:0042105);cell-cell junction (GO:0005911);cytoplasm (GO:0005737);cytosol (GO:0005829);extracellular exosome (GO:0070062);membrane (GO:0016020);nucleolus (GO:0005730);nucleus (GO:0005634);	3D-structure;Alternative splicing;Complete proteome;Cytoplasm;Hydrolase;Nucleus;Phosphoprotein;Protein phosphatase;Reference proteome;Repeat;SH2 domain.;		0.352784	1.48489	0.701409	1	94	58	76	PTN6
Locus_10176_Transcript_8/8_Confidence_0.636_Length_2616	2616	Locus_10176_Transcript_8/8_Confidence_0.636_Length_2616	2616	Locus_10176_Transcript_8/8_Confidence_0.636_Length_2616	2616	P29350	80.537	0	PTN6_HUMAN	Tyrosine-protein phosphatase non-receptor type 6	hsa:5777	GO:0042105 \\ GO:0005911 \\ GO:0005737 \\ GO:0005829 \\ GO:0070062 \\ GO:0016020 \\ GO:0005730 \\ GO:0005634 \\ GO:0019901 \\ GO:0004725 \\ GO:0005001 \\ GO:0033277 \\ GO:0006915 \\ GO:0050853 \\ GO:0007596 \\ GO:0030154 \\ GO:0008283 \\ GO:0019221 \\ GO:0007186 \\ GO:0060333 \\ GO:0060397 \\ GO:0050900 \\ GO:0035855 \\ GO:0042267 \\ GO:0050859 \\ GO:0008285 \\ GO:0002924 \\ GO:0043407 \\ GO:0050…	abortive mitotic cell cycle (GO:0033277);apoptotic process (GO:0006915);B cell receptor signaling pathway (GO:0050853);blood coagulation (GO:0007596);cell differentiation (GO:0030154);cell proliferation (GO:0008283);cytokine-mediated signaling pathway (GO:0019221);G-protein coupled receptor signaling pathway (GO:0007186);interferon-gamma-mediated signaling pathway (GO:0060333);JAK-STAT cascade in…	protein kinase binding (GO:0019901);protein tyrosine phosphatase activity (GO:0004725);transmembrane receptor protein tyrosine phosphatase activity (GO:0005001);	alpha-beta T cell receptor complex (GO:0042105);cell-cell junction (GO:0005911);cytoplasm (GO:0005737);cytosol (GO:0005829);extracellular exosome (GO:0070062);membrane (GO:0016020);nucleolus (GO:0005730);nucleus (GO:0005634);	3D-structure;Alternative splicing;Complete proteome;Cytoplasm;Hydrolase;Nucleus;Phosphoprotein;Protein phosphatase;Reference proteome;Repeat;SH2 domain.;		-0.35937	2.71012	0.677986	1	175	177	176	PTN6
Locus_10178_Transcript_1/1_Confidence_1.000_Length_4229	4229	Locus_10178_Transcript_1/1_Confidence_1.000_Length_4229	4229	Locus_10178_Transcript_1/1_Confidence_1.000_Length_4229	4229	Q3UQ28	79.913	0	PXDN_MOUSE	Peroxidasin homolog	mmu:69675	GO:0005783 \\ GO:0070062 \\ GO:0031012 \\ GO:0005615 \\ GO:0005578 \\ GO:0005201 \\ GO:0020037 \\ GO:0046872 \\ GO:0004601 \\ GO:0098869 \\ GO:0030198 \\ GO:0042744 \\ GO:0055114 \\ GO:0006979 \\	cellular oxidant detoxification (GO:0098869);extracellular matrix organization (GO:0030198);hydrogen peroxide catabolic process (GO:0042744);oxidation-reduction process (GO:0055114);response to oxidative stress (GO:0006979);	extracellular matrix structural constituent (GO:0005201);heme binding (GO:0020037);metal ion binding (GO:0046872);peroxidase activity (GO:0004601);	endoplasmic reticulum (GO:0005783);extracellular exosome (GO:0070062);extracellular matrix (GO:0031012);extracellular space (GO:0005615);proteinaceous extracellular matrix (GO:0005578);	Calcium;Complete proteome;Disulfide bond;Extracellular matrix;Glycoprotein;Heme;Hydrogen peroxide;Immunoglobulin domain;Iron;Leucine-rich repeat;Metal-binding;Oxidoreductase;Peroxidase;Phosphoprotein;Reference proteome;Repeat;Secreted;Signal.;		-1.04195	2.64398	0.227362	1	125	203	164	PXDN
Locus_10179_Transcript_2/3_Confidence_0.667_Length_4029	4029	Locus_10179_Transcript_2/3_Confidence_0.667_Length_4029	4029	Locus_10179_Transcript_2/3_Confidence_0.667_Length_4029	4029	Q5F336	87.956	1.61e-164	MBLC2_CHICK	Metallo-beta-lactamase domain-containing protein 2	gga:431565	GO:0070062 \\ GO:0016787 \\ GO:0046872 \\	No_GOBP	hydrolase activity (GO:0016787);metal ion binding (GO:0046872);	extracellular exosome (GO:0070062);	Complete proteome;Hydrolase;Metal-binding;Reference proteome;Zinc.;		-1.11088	3.55855	0.193185	1	229	390	309.5	MBLC2
Locus_1018_Transcript_4/7_Confidence_0.647_Length_2567	2567	No_sig_nr_hit	No_sig_nr_hit	No_sig_nr_hit	No_sig_nr_hit	No_Uniprotmatch	No_%_identity	No_evalue	No_ID	No_Description	No_KEGG	No_GO	No_GOCC	No_GOBP	No_GOMF	No_keywords		-0.00786552	9.7771	0.99252	1	26970	21376	24173	No
Locus_1018_Transcript_5/7_Confidence_0.588_Length_2522	2522	No_sig_nr_hit	No_sig_nr_hit	No_sig_nr_hit	No_sig_nr_hit	No_Uniprotmatch	No_%_identity	No_evalue	No_ID	No_Description	No_KEGG	No_GO	No_GOCC	No_GOBP	No_GOMF	No_keywords		0.153438	9.82682	0.853892	1	29479	20893	25186	No
Locus_1018_Transcript_6/7_Confidence_0.176_Length_989	989	No_sig_nr_hit	No_sig_nr_hit	No_sig_nr_hit	No_sig_nr_hit	No_Uniprotmatch	No_%_identity	No_evalue	No_ID	No_Description	No_KEGG	No_GO	No_GOCC	No_GOBP	No_GOMF	No_keywords		-0.307384	11.0444	0.712274	1	58192	56764	57478	No
Locus_10181_Transcript_1/2_Confidence_0.750_Length_2442	2442	Locus_10181_Transcript_1/2_Confidence_0.750_Length_2442	2442	Locus_10181_Transcript_1/2_Confidence_0.750_Length_2442	2442	Q9Z2J0	79.965	0	S23A1_MOUSE	Solute carrier family 23 member 1	mmu:20522	GO:0016324 \\ GO:0009925 \\ GO:0005737 \\ GO:0070062 \\ GO:0016021 \\ GO:0043229 \\ GO:0005886 \\ GO:0033300 \\ GO:0008520 \\ GO:0015229 \\ GO:0015081 \\ GO:0070890 \\ GO:0007420 \\ GO:0070837 \\ GO:0015882 \\ GO:0030324 \\ GO:0009636 \\ GO:0035725 \\ GO:0006814 \\ GO:0070904 \\ GO:0035461 \\	brain development (GO:0007420);dehydroascorbic acid transport (GO:0070837);L-ascorbic acid transport (GO:0015882);lung development (GO:0030324);response to toxic substance (GO:0009636);sodium ion transmembrane transport (GO:0035725);sodium ion transport (GO:0006814);transepithelial L-ascorbic acid transport (GO:0070904);vitamin transmembrane transport (GO:0035461);	dehydroascorbic acid transporter activity (GO:0033300);L-ascorbate (GO:0008520);L-ascorbic acid transporter activity (GO:0015229);sodium ion transmembrane transporter activity (GO:0015081);sodium-dependent L-ascorbate transmembrane transporter activity (GO:0070890);	apical plasma membrane (GO:0016324);basal plasma membrane (GO:0009925);cytoplasm (GO:0005737);extracellular exosome (GO:0070062);integral component of membrane (GO:0016021);intracellular organelle (GO:0043229);plasma membrane (GO:0005886);	Cell membrane;Complete proteome;Glycoprotein;Ion transport;Membrane;Phosphoprotein;Reference proteome;Sodium;Sodium transport;Symport;Transmembrane;Transmembrane helix;Transport.;		0.545708	5.11307	0.516108	1	1263	682	972.5	S23A1
Locus_101825_Transcript_1/1_Confidence_1.000_Length_218	218	No_sig_nr_hit	No_sig_nr_hit	No_sig_nr_hit	No_sig_nr_hit	No_Uniprotmatch	No_%_identity	No_evalue	No_ID	No_Description	No_KEGG	No_GO	No_GOCC	No_GOBP	No_GOMF	No_keywords		-0.234157	-0.825079	0.831972	1	14	13	13.5	No
Locus_10184_Transcript_1/3_Confidence_0.714_Length_3235	3235	Locus_10184_Transcript_1/3_Confidence_0.714_Length_3235	3235	Locus_10184_Transcript_1/3_Confidence_0.714_Length_3235	3235	Q564G3	75.497	1.93e-161	DEGS2_RAT	Sphingolipid delta(4)-desaturase/C4-monooxygenase DES2	rno:314438	GO:0005789 \\ GO:0016021 \\ GO:0042284 \\ GO:0000170 \\ GO:0046513 \\ GO:0006667 \\	ceramide biosynthetic process (GO:0046513);sphinganine metabolic process (GO:0006667);	sphingolipid delta-4 desaturase activity (GO:0042284);sphingosine hydroxylase activity (GO:0000170);	endoplasmic reticulum membrane (GO:0005789);integral component of membrane (GO:0016021);	Complete proteome;Endoplasmic reticulum;Lipid biosynthesis;Lipid metabolism;Lipoprotein;Membrane;Myristate;Oxidoreductase;Reference proteome;Transmembrane;Transmembrane helix.;		-0.224822	0.897057	0.815483	1	51	47	49	DEGS2
Locus_10185_Transcript_1/6_Confidence_0.667_Length_6122	6122	Locus_10185_Transcript_1/6_Confidence_0.667_Length_6122	6122	Locus_10185_Transcript_1/6_Confidence_0.667_Length_6122	6122	Q9NWN3	58.184	0	FBX34_HUMAN	F-box only protein 34	hsa:55030	GO:0005737 \\ GO:0005654 \\	No_GOBP	No_GOMF	cytoplasm (GO:0005737);nucleoplasm (GO:0005654);	Complete proteome;Polymorphism;Reference proteome;Ubl conjugation pathway.;		-0.205582	2.72213	0.818669	1	187	170	178.5	FBX34
Locus_10185_Transcript_2/6_Confidence_0.600_Length_6274	6274	Locus_10185_Transcript_2/6_Confidence_0.600_Length_6274	6274	Locus_10185_Transcript_2/6_Confidence_0.600_Length_6274	6274	Q9NWN3	58.184	0	FBX34_HUMAN	F-box only protein 34	hsa:55030	GO:0005737 \\ GO:0005654 \\	No_GOBP	No_GOMF	cytoplasm (GO:0005737);nucleoplasm (GO:0005654);	Complete proteome;Polymorphism;Reference proteome;Ubl conjugation pathway.;		-0.50633	2.57272	0.558582	1	150	168	159	FBX34
Locus_10187_Transcript_6/10_Confidence_0.375_Length_2887	2887	Locus_10187_Transcript_6/10_Confidence_0.375_Length_2887	2887	Locus_10187_Transcript_6/10_Confidence_0.375_Length_2887	2887	Q5SUV2	44.309	2.03e-174	MYBPP_MOUSE	MYCBP-associated protein	mmu:104601	GO:0005737 \\ GO:0016020 \\ GO:0030154 \\ GO:0007275 \\ GO:0007283 \\ GO:0007268 \\	cell differentiation (GO:0030154);multicellular organismal development (GO:0007275);spermatogenesis (GO:0007283);synaptic transmission (GO:0007268);	No_GOMF	cytoplasm (GO:0005737);membrane (GO:0016020);	Alternative splicing;Complete proteome;Cytoplasm;Developmental protein;Differentiation;Membrane;Phosphoprotein;Reference proteome;Spermatogenesis.;		0.0838824	0.382331	0.962648	1	39	29	34	MYBPP
Locus_10187_Transcript_8/10_Confidence_0.625_Length_3349	3349	Locus_10187_Transcript_8/10_Confidence_0.625_Length_3349	3349	Locus_10187_Transcript_8/10_Confidence_0.625_Length_3349	3349	Q5SUV2	44.309	7.65e-173	MYBPP_MOUSE	MYCBP-associated protein	mmu:104601	GO:0005737 \\ GO:0016020 \\ GO:0030154 \\ GO:0007275 \\ GO:0007283 \\ GO:0007268 \\	cell differentiation (GO:0030154);multicellular organismal development (GO:0007275);spermatogenesis (GO:0007283);synaptic transmission (GO:0007268);	No_GOMF	cytoplasm (GO:0005737);membrane (GO:0016020);	Alternative splicing;Complete proteome;Cytoplasm;Developmental protein;Differentiation;Membrane;Phosphoprotein;Reference proteome;Spermatogenesis.;		0.239707	-0.702818	0.92275	1	18	12	15	MYBPP
Locus_10189_Transcript_1/1_Confidence_1.000_Length_3861	3861	Locus_10189_Transcript_1/1_Confidence_1.000_Length_3861	3861	Locus_10189_Transcript_1/1_Confidence_1.000_Length_3861	3861	O60285	84.652	0	NUAK1_HUMAN	NUAK family SNF1-like kinase 1	hsa:9891	GO:0005737 \\ GO:0015630 \\ GO:0005730 \\ GO:0005634 \\ GO:0005524 \\ GO:0046872 \\ GO:0002039 \\ GO:0004674 \\ GO:0007155 \\ GO:0006974 \\ GO:0035556 \\ GO:0006468 \\ GO:0030155 \\ GO:0042127 \\ GO:2000772 \\ GO:0035507 \\	cell adhesion (GO:0007155);cellular response to DNA damage stimulus (GO:0006974);intracellular signal transduction (GO:0035556);protein phosphorylation (GO:0006468);regulation of cell adhesion (GO:0030155);regulation of cell proliferation (GO:0042127);regulation of cellular senescence (GO:2000772);regulation of myosin-light-chain-phosphatase activity (GO:0035507);	ATP binding (GO:0005524);metal ion binding (GO:0046872);p53 binding (GO:0002039);protein serine/threonine kinase activity (GO:0004674);	cytoplasm (GO:0005737);microtubule cytoskeleton (GO:0015630);nucleolus (GO:0005730);nucleus (GO:0005634);	Acetylation;Alternative splicing;ATP-binding;Cell adhesion;Complete proteome;Cytoplasm;DNA damage;Kinase;Magnesium;Metal-binding;Nucleotide-binding;Nucleus;Phosphoprotein;Polymorphism;Reference proteome;Serine/threonine-protein kinase;Transferase;Ubl conjugation.;		-0.486173	3.17258	0.568974	1	230	254	242	NUAK1
Locus_101890_Transcript_1/1_Confidence_1.000_Length_666	666	No_sig_nr_hit	No_sig_nr_hit	No_sig_nr_hit	No_sig_nr_hit	No_Uniprotmatch	No_%_identity	No_evalue	No_ID	No_Description	No_KEGG	No_GO	No_GOCC	No_GOBP	No_GOMF	No_keywords		1.03833	1.57966	0.24373	1	120	46	83	No
Locus_1019_Transcript_1/5_Confidence_0.667_Length_6086	6086	Locus_1019_Transcript_1/5_Confidence_0.667_Length_6086	6086	Locus_1019_Transcript_1/5_Confidence_0.667_Length_6086	6086	O43795	93.398	0	MYO1B_HUMAN	Unconventional myosin-Ib	hsa:4430	GO:0005884 \\ GO:0005903 \\ GO:0071944 \\ GO:0005737 \\ GO:0005769 \\ GO:0010008 \\ GO:0070062 \\ GO:0030175 \\ GO:0016459 \\ GO:0048471 \\ GO:0005886 \\ GO:0051015 \\ GO:0030898 \\ GO:0005524 \\ GO:0000146 \\ GO:0005547 \\ GO:0005546 \\ GO:0051017 \\ GO:0007015 \\ GO:0030048 \\ GO:0006892 \\	actin filament bundle assembly (GO:0051017);actin filament organization (GO:0007015);actin filament-based movement (GO:0030048);post-Golgi vesicle-mediated transport (GO:0006892);	actin filament binding (GO:0051015);actin-dependent ATPase activity (GO:0030898);ATP binding (GO:0005524);microfilament motor activity (GO:0000146);phosphatidylinositol-3,4,5-trisphosphate binding (GO:0005547);phosphatidylinositol-4,5-bisphosphate binding (GO:0005546);	actin filament (GO:0005884);brush border (GO:0005903);cell periphery (GO:0071944);cytoplasm (GO:0005737);early endosome (GO:0005769);endosome membrane (GO:0010008);extracellular exosome (GO:0070062);filopodium (GO:0030175);myosin complex (GO:0016459);perinuclear region of cytoplasm (GO:0048471);plasma membrane (GO:0005886);	Actin-binding;Alternative splicing;ATP-binding;Calmodulin-binding;Complete proteome;Isopeptide bond;Motor protein;Myosin;Nucleotide-binding;Phosphoprotein;Polymorphism;Reference proteome;Repeat;Ubl conjugation.;		0.297827	5.2276	0.722916	1	1271	815	1043	MYO1B
Locus_1019_Transcript_4/5_Confidence_0.500_Length_5918	5918	Locus_1019_Transcript_4/5_Confidence_0.500_Length_5918	5918	Locus_1019_Transcript_4/5_Confidence_0.500_Length_5918	5918	P46735	89.811	0	MYO1B_MOUSE	Unconventional myosin-Ib	No_KEGG	GO:0005884 \\ GO:0005903 \\ GO:0071944 \\ GO:0005737 \\ GO:0005769 \\ GO:0010008 \\ GO:0070062 \\ GO:0030175 \\ GO:0016459 \\ GO:0048471 \\ GO:0005886 \\ GO:0051015 \\ GO:0005524 \\ GO:0000146 \\ GO:0005547 \\ GO:0005546 \\ GO:0051017 \\ GO:0007015 \\ GO:0030048 \\ GO:0006892 \\	actin filament bundle assembly (GO:0051017);actin filament organization (GO:0007015);actin filament-based movement (GO:0030048);post-Golgi vesicle-mediated transport (GO:0006892);	actin filament binding (GO:0051015);ATP binding (GO:0005524);microfilament motor activity (GO:0000146);phosphatidylinositol-3,4,5-trisphosphate binding (GO:0005547);phosphatidylinositol-4,5-bisphosphate binding (GO:0005546);	actin filament (GO:0005884);brush border (GO:0005903);cell periphery (GO:0071944);cytoplasm (GO:0005737);early endosome (GO:0005769);endosome membrane (GO:0010008);extracellular exosome (GO:0070062);filopodium (GO:0030175);myosin complex (GO:0016459);perinuclear region of cytoplasm (GO:0048471);plasma membrane (GO:0005886);	Actin-binding;Alternative splicing;ATP-binding;Calmodulin-binding;Complete proteome;Isopeptide bond;Motor protein;Myosin;Nucleotide-binding;Phosphoprotein;Reference proteome;Repeat;Ubl conjugation.;		0.285545	5.32311	0.7338	1	1353	875	1114	MYO1B
Locus_10191_Transcript_1/4_Confidence_0.667_Length_2748	2748	Locus_10191_Transcript_1/4_Confidence_0.667_Length_2748	2748	Locus_10191_Transcript_1/4_Confidence_0.667_Length_2748	2748	Q92963	92.857	3.83e-83	RIT1_HUMAN	GTP-binding protein Rit1	hsa:6016	GO:0005622 \\ GO:0005886 \\ GO:0005516 \\ GO:0005525 \\ GO:0048011 \\ GO:0007265 \\ GO:0007165 \\ GO:0007264 \\	neurotrophin TRK receptor signaling pathway (GO:0048011);Ras protein signal transduction (GO:0007265);signal transduction (GO:0007165);small GTPase mediated signal transduction (GO:0007264);	calmodulin binding (GO:0005516);GTP binding (GO:0005525);	intracellular (GO:0005622);plasma membrane (GO:0005886);	3D-structure;Alternative splicing;Cell membrane;Complete proteome;Disease mutation;GTP-binding;Membrane;Nucleotide-binding;Reference proteome.;		0.082403	1.54253	0.931433	1	90	67	78.5	RIT1
Locus_10191_Transcript_2/4_Confidence_0.556_Length_2894	2894	Locus_10191_Transcript_2/4_Confidence_0.556_Length_2894	2894	Locus_10191_Transcript_2/4_Confidence_0.556_Length_2894	2894	Q92963	95.025	5.77e-131	RIT1_HUMAN	GTP-binding protein Rit1	hsa:6016	GO:0005622 \\ GO:0005886 \\ GO:0005516 \\ GO:0005525 \\ GO:0048011 \\ GO:0007265 \\ GO:0007165 \\ GO:0007264 \\	neurotrophin TRK receptor signaling pathway (GO:0048011);Ras protein signal transduction (GO:0007265);signal transduction (GO:0007165);small GTPase mediated signal transduction (GO:0007264);	calmodulin binding (GO:0005516);GTP binding (GO:0005525);	intracellular (GO:0005622);plasma membrane (GO:0005886);	3D-structure;Alternative splicing;Cell membrane;Complete proteome;Disease mutation;GTP-binding;Membrane;Nucleotide-binding;Reference proteome.;		0.406791	1.63131	0.654612	1	106	63	84.5	RIT1
Locus_10191_Transcript_3/4_Confidence_0.556_Length_2936	2936	Locus_10191_Transcript_3/4_Confidence_0.556_Length_2936	2936	Locus_10191_Transcript_3/4_Confidence_0.556_Length_2936	2936	Q92963	95.025	7.89e-131	RIT1_HUMAN	GTP-binding protein Rit1	hsa:6016	GO:0005622 \\ GO:0005886 \\ GO:0005516 \\ GO:0005525 \\ GO:0048011 \\ GO:0007265 \\ GO:0007165 \\ GO:0007264 \\	neurotrophin TRK receptor signaling pathway (GO:0048011);Ras protein signal transduction (GO:0007265);signal transduction (GO:0007165);small GTPase mediated signal transduction (GO:0007264);	calmodulin binding (GO:0005516);GTP binding (GO:0005525);	intracellular (GO:0005622);plasma membrane (GO:0005886);	3D-structure;Alternative splicing;Cell membrane;Complete proteome;Disease mutation;GTP-binding;Membrane;Nucleotide-binding;Reference proteome.;		-0.302629	1.43865	0.747653	1	73	71	72	RIT1
Locus_10194_Transcript_1/2_Confidence_0.750_Length_1668	1668	Locus_10194_Transcript_1/2_Confidence_0.750_Length_1668	1668	Locus_10194_Transcript_1/2_Confidence_0.750_Length_1668	1668	O75521	64.721	8.44e-175	ECI2_HUMAN	Enoyl-CoA delta isomerase 2, mitochondrial	hsa:10455	GO:0043231 \\ GO:0016020 \\ GO:0005739 \\ GO:0005654 \\ GO:0005782 \\ GO:0004165 \\ GO:0000062 \\ GO:0005102 \\ GO:0006635 \\ GO:0009062 \\	fatty acid beta-oxidation (GO:0006635);fatty acid catabolic process (GO:0009062);	dodecenoyl-CoA delta-isomerase activity (GO:0004165);fatty-acyl-CoA binding (GO:0000062);receptor binding (GO:0005102);	intracellular membrane-bounded organelle (GO:0043231);membrane (GO:0016020);mitochondrion (GO:0005739);nucleoplasm (GO:0005654);peroxisomal matrix (GO:0005782);	3D-structure;Acetylation;Alternative splicing;Complete proteome;Isomerase;Mitochondrion;Peroxisome;Phosphoprotein;Polymorphism;Reference proteome;Transit peptide.;		-0.927147	7.78892	0.269787	1	4698	7042	5870	ECI2
Locus_101963_Transcript_1/1_Confidence_1.000_Length_799	799	No_sig_nr_hit	No_sig_nr_hit	No_sig_nr_hit	No_sig_nr_hit	No_Uniprotmatch	No_%_identity	No_evalue	No_ID	No_Description	No_KEGG	No_GO	No_GOCC	No_GOBP	No_GOMF	No_keywords		-1.17174	-0.325967	0.243218	1	14	25	19.5	No
Locus_102_Transcript_1/9_Confidence_0.636_Length_4551	4551	Locus_102_Transcript_1/9_Confidence_0.636_Length_4551	4551	Locus_102_Transcript_1/9_Confidence_0.636_Length_4551	4551	Q5RAS6	95.935	7.97e-73	COPT1_PONAB	High affinity copper uptake protein 1	pon:100172583	GO:0016021 \\ GO:0005886 \\ GO:0005375 \\	No_GOBP	copper ion transmembrane transporter activity (GO:0005375);	integral component of membrane (GO:0016021);plasma membrane (GO:0005886);	Cell membrane;Complete proteome;Copper;Copper transport;Glycoprotein;Ion transport;Membrane;Reference proteome;Transmembrane;Transmembrane helix;Transport.;		0.0479538	4.81535	0.957015	1	880	671	775.5	COPT1
Locus_102_Transcript_2/9_Confidence_0.455_Length_1173	1173	Locus_102_Transcript_2/9_Confidence_0.455_Length_1173	1173	Locus_102_Transcript_2/9_Confidence_0.455_Length_1173	1173	Q8K211	84.615	1.51e-44	COPT1_MOUSE	High affinity copper uptake protein 1	mmu:20529	GO:0016021 \\ GO:0005770 \\ GO:0043025 \\ GO:0005886 \\ GO:0055037 \\ GO:0015088 \\ GO:0006878 \\ GO:0072719 \\ GO:0015677 \\ GO:1902861 \\ GO:0006855 \\	cellular copper ion homeostasis (GO:0006878);cellular response to cisplatin (GO:0072719);copper ion import (GO:0015677);copper ion import into cell (GO:1902861);drug transmembrane transport (GO:0006855);	copper uptake transmembrane transporter activity (GO:0015088);	integral component of membrane (GO:0016021);late endosome (GO:0005770);neuronal cell body (GO:0043025);plasma membrane (GO:0005886);recycling endosome (GO:0055037);	Cell membrane;Complete proteome;Copper;Copper transport;Glycoprotein;Ion transport;Membrane;Reference proteome;Transmembrane;Transmembrane helix;Transport.;		-0.266409	0.547378	0.801998	1	39	37	38	COPT1
Locus_102_Transcript_3/9_Confidence_0.636_Length_4626	4626	Locus_102_Transcript_3/9_Confidence_0.636_Length_4626	4626	Locus_102_Transcript_3/9_Confidence_0.636_Length_4626	4626	Q8K211	89.172	6.97e-88	COPT1_MOUSE	High affinity copper uptake protein 1	mmu:20529	GO:0016021 \\ GO:0005770 \\ GO:0043025 \\ GO:0005886 \\ GO:0055037 \\ GO:0015088 \\ GO:0006878 \\ GO:0072719 \\ GO:0015677 \\ GO:1902861 \\ GO:0006855 \\	cellular copper ion homeostasis (GO:0006878);cellular response to cisplatin (GO:0072719);copper ion import (GO:0015677);copper ion import into cell (GO:1902861);drug transmembrane transport (GO:0006855);	copper uptake transmembrane transporter activity (GO:0015088);	integral component of membrane (GO:0016021);late endosome (GO:0005770);neuronal cell body (GO:0043025);plasma membrane (GO:0005886);recycling endosome (GO:0055037);	Cell membrane;Complete proteome;Copper;Copper transport;Glycoprotein;Ion transport;Membrane;Reference proteome;Transmembrane;Transmembrane helix;Transport.;		-0.111614	4.95487	0.894559	1	917	781	849	COPT1
Locus_102_Transcript_5/9_Confidence_0.636_Length_4729	4729	Locus_102_Transcript_5/9_Confidence_0.636_Length_4729	4729	Locus_102_Transcript_5/9_Confidence_0.636_Length_4729	4729	Q8K211	89.172	1.49e-87	COPT1_MOUSE	High affinity copper uptake protein 1	mmu:20529	GO:0016021 \\ GO:0005770 \\ GO:0043025 \\ GO:0005886 \\ GO:0055037 \\ GO:0015088 \\ GO:0006878 \\ GO:0072719 \\ GO:0015677 \\ GO:1902861 \\ GO:0006855 \\	cellular copper ion homeostasis (GO:0006878);cellular response to cisplatin (GO:0072719);copper ion import (GO:0015677);copper ion import into cell (GO:1902861);drug transmembrane transport (GO:0006855);	copper uptake transmembrane transporter activity (GO:0015088);	integral component of membrane (GO:0016021);late endosome (GO:0005770);neuronal cell body (GO:0043025);plasma membrane (GO:0005886);recycling endosome (GO:0055037);	Cell membrane;Complete proteome;Copper;Copper transport;Glycoprotein;Ion transport;Membrane;Reference proteome;Transmembrane;Transmembrane helix;Transport.;		-0.0197222	4.90654	0.983174	1	916	732	824	COPT1
Locus_102_Transcript_6/9_Confidence_0.455_Length_4579	4579	Locus_102_Transcript_6/9_Confidence_0.455_Length_4579	4579	Locus_102_Transcript_6/9_Confidence_0.455_Length_4579	4579	Q8K211	89.172	5.85e-88	COPT1_MOUSE	High affinity copper uptake protein 1	mmu:20529	GO:0016021 \\ GO:0005770 \\ GO:0043025 \\ GO:0005886 \\ GO:0055037 \\ GO:0015088 \\ GO:0006878 \\ GO:0072719 \\ GO:0015677 \\ GO:1902861 \\ GO:0006855 \\	cellular copper ion homeostasis (GO:0006878);cellular response to cisplatin (GO:0072719);copper ion import (GO:0015677);copper ion import into cell (GO:1902861);drug transmembrane transport (GO:0006855);	copper uptake transmembrane transporter activity (GO:0015088);	integral component of membrane (GO:0016021);late endosome (GO:0005770);neuronal cell body (GO:0043025);plasma membrane (GO:0005886);recycling endosome (GO:0055037);	Cell membrane;Complete proteome;Copper;Copper transport;Glycoprotein;Ion transport;Membrane;Reference proteome;Transmembrane;Transmembrane helix;Transport.;		0.0864114	4.92038	0.920124	1	959	712	835.5	COPT1
Locus_1020_Transcript_1/5_Confidence_0.500_Length_2232	2232	Locus_1020_Transcript_1/5_Confidence_0.500_Length_2232	2232	Locus_1020_Transcript_1/5_Confidence_0.500_Length_2232	2232	P40241	67.805	6.38e-89	CD9_RAT	CD9 antigen	rno:24936	GO:0016324 \\ GO:0009986 \\ GO:0009897 \\ GO:0070062 \\ GO:0005615 \\ GO:0005925 \\ GO:0005887 \\ GO:0005178 \\ GO:0007420 \\ GO:0007155 \\ GO:0007166 \\ GO:0071404 \\ GO:0007342 \\ GO:0006928 \\ GO:0008285 \\ GO:0014003 \\ GO:0030913 \\ GO:0031623 \\ GO:0009414 \\	brain development (GO:0007420);cell adhesion (GO:0007155);cell surface receptor signaling pathway (GO:0007166);cellular response to low-density lipoprotein particle stimulus (GO:0071404);fusion of sperm to egg plasma membrane (GO:0007342);movement of cell or subcellular component (GO:0006928);negative regulation of cell proliferation (GO:0008285);oligodendrocyte development (GO:0014003);paranodal…	integrin binding (GO:0005178);	apical plasma membrane (GO:0016324);cell surface (GO:0009986);external side of plasma membrane (GO:0009897);extracellular exosome (GO:0070062);extracellular space (GO:0005615);focal adhesion (GO:0005925);integral component of plasma membrane (GO:0005887);	Cell adhesion;Complete proteome;Direct protein sequencing;Disulfide bond;Fertilization;Glycoprotein;Lipoprotein;Membrane;Palmitate;Reference proteome;Transmembrane;Transmembrane helix.;		0.564274	1.93007	0.516469	1	137	73	105	CD9
Locus_1020_Transcript_3/5_Confidence_0.667_Length_2365	2365	Locus_1020_Transcript_3/5_Confidence_0.667_Length_2365	2365	Locus_1020_Transcript_3/5_Confidence_0.667_Length_2365	2365	P40241	70.485	2.42e-106	CD9_RAT	CD9 antigen	rno:24936	GO:0016324 \\ GO:0009986 \\ GO:0009897 \\ GO:0070062 \\ GO:0005615 \\ GO:0005925 \\ GO:0005887 \\ GO:0005178 \\ GO:0007420 \\ GO:0007155 \\ GO:0007166 \\ GO:0071404 \\ GO:0007342 \\ GO:0006928 \\ GO:0008285 \\ GO:0014003 \\ GO:0030913 \\ GO:0031623 \\ GO:0009414 \\	brain development (GO:0007420);cell adhesion (GO:0007155);cell surface receptor signaling pathway (GO:0007166);cellular response to low-density lipoprotein particle stimulus (GO:0071404);fusion of sperm to egg plasma membrane (GO:0007342);movement of cell or subcellular component (GO:0006928);negative regulation of cell proliferation (GO:0008285);oligodendrocyte development (GO:0014003);paranodal…	integrin binding (GO:0005178);	apical plasma membrane (GO:0016324);cell surface (GO:0009986);external side of plasma membrane (GO:0009897);extracellular exosome (GO:0070062);extracellular space (GO:0005615);focal adhesion (GO:0005925);integral component of plasma membrane (GO:0005887);	Cell adhesion;Complete proteome;Direct protein sequencing;Disulfide bond;Fertilization;Glycoprotein;Lipoprotein;Membrane;Palmitate;Reference proteome;Transmembrane;Transmembrane helix.;		0.3212	1.95477	0.719866	1	130	82	106	CD9
Locus_10200_Transcript_1/4_Confidence_0.500_Length_933	933	Locus_10200_Transcript_1/4_Confidence_0.500_Length_933	933	Locus_10200_Transcript_1/4_Confidence_0.500_Length_933	933	Q9W7C5	92.857	1.17e-18	HBEGF_CHICK	Proheparin-binding EGF-like growth factor	gga:395654	GO:0005615 \\ GO:0005887 \\ GO:0005154 \\ GO:0008083 \\ GO:0008201 \\ GO:0060326 \\ GO:0021545 \\ GO:0007173 \\ GO:0008284 \\ GO:0051549 \\ GO:0051897 \\ GO:0048661 \\ GO:0090303 \\ GO:0008016 \\ GO:0035313 \\	cell chemotaxis (GO:0060326);cranial nerve development (GO:0021545);epidermal growth factor receptor signaling pathway (GO:0007173);positive regulation of cell proliferation (GO:0008284);positive regulation of keratinocyte migration (GO:0051549);positive regulation of protein kinase B signaling (GO:0051897);positive regulation of smooth muscle cell proliferation (GO:0048661);positive regulation o…	epidermal growth factor receptor binding (GO:0005154);growth factor activity (GO:0008083);heparin binding (GO:0008201);	extracellular space (GO:0005615);integral component of plasma membrane (GO:0005887);	Cell membrane;Complete proteome;Disulfide bond;EGF-like domain;Growth factor;Heparin-binding;Membrane;Receptor;Reference proteome;Secreted;Signal;Transmembrane;Transmembrane helix.;		-0.120727	2.33531	0.890959	1	147	126	136.5	HBEGF
Locus_10200_Transcript_2/4_Confidence_0.400_Length_797	797	Locus_10200_Transcript_2/4_Confidence_0.400_Length_797	797	Locus_10200_Transcript_2/4_Confidence_0.400_Length_797	797	Q9W7C5	83.069	6.58e-63	HBEGF_CHICK	Proheparin-binding EGF-like growth factor	gga:395654	GO:0005615 \\ GO:0005887 \\ GO:0005154 \\ GO:0008083 \\ GO:0008201 \\ GO:0060326 \\ GO:0021545 \\ GO:0007173 \\ GO:0008284 \\ GO:0051549 \\ GO:0051897 \\ GO:0048661 \\ GO:0090303 \\ GO:0008016 \\ GO:0035313 \\	cell chemotaxis (GO:0060326);cranial nerve development (GO:0021545);epidermal growth factor receptor signaling pathway (GO:0007173);positive regulation of cell proliferation (GO:0008284);positive regulation of keratinocyte migration (GO:0051549);positive regulation of protein kinase B signaling (GO:0051897);positive regulation of smooth muscle cell proliferation (GO:0048661);positive regulation o…	epidermal growth factor receptor binding (GO:0005154);growth factor activity (GO:0008083);heparin binding (GO:0008201);	extracellular space (GO:0005615);integral component of plasma membrane (GO:0005887);	Cell membrane;Complete proteome;Disulfide bond;EGF-like domain;Growth factor;Heparin-binding;Membrane;Receptor;Reference proteome;Secreted;Signal;Transmembrane;Transmembrane helix.;		-0.927338	2.41215	0.282872	1	112	168	140	HBEGF
Locus_10200_Transcript_3/4_Confidence_0.500_Length_2576	2576	Locus_10200_Transcript_3/4_Confidence_0.500_Length_2576	2576	Locus_10200_Transcript_3/4_Confidence_0.500_Length_2576	2576	Q9W7C5	92.857	5.97e-18	HBEGF_CHICK	Proheparin-binding EGF-like growth factor	gga:395654	GO:0005615 \\ GO:0005887 \\ GO:0005154 \\ GO:0008083 \\ GO:0008201 \\ GO:0060326 \\ GO:0021545 \\ GO:0007173 \\ GO:0008284 \\ GO:0051549 \\ GO:0051897 \\ GO:0048661 \\ GO:0090303 \\ GO:0008016 \\ GO:0035313 \\	cell chemotaxis (GO:0060326);cranial nerve development (GO:0021545);epidermal growth factor receptor signaling pathway (GO:0007173);positive regulation of cell proliferation (GO:0008284);positive regulation of keratinocyte migration (GO:0051549);positive regulation of protein kinase B signaling (GO:0051897);positive regulation of smooth muscle cell proliferation (GO:0048661);positive regulation o…	epidermal growth factor receptor binding (GO:0005154);growth factor activity (GO:0008083);heparin binding (GO:0008201);	extracellular space (GO:0005615);integral component of plasma membrane (GO:0005887);	Cell membrane;Complete proteome;Disulfide bond;EGF-like domain;Growth factor;Heparin-binding;Membrane;Receptor;Reference proteome;Secreted;Signal;Transmembrane;Transmembrane helix.;		-0.247448	2.48562	0.778257	1	156	146	151	HBEGF
Locus_10200_Transcript_4/4_Confidence_0.600_Length_1278	1278	Locus_10200_Transcript_4/4_Confidence_0.600_Length_1278	1278	Locus_10200_Transcript_4/4_Confidence_0.600_Length_1278	1278	Q9W7C5	84.434	4.93e-78	HBEGF_CHICK	Proheparin-binding EGF-like growth factor	gga:395654	GO:0005615 \\ GO:0005887 \\ GO:0005154 \\ GO:0008083 \\ GO:0008201 \\ GO:0060326 \\ GO:0021545 \\ GO:0007173 \\ GO:0008284 \\ GO:0051549 \\ GO:0051897 \\ GO:0048661 \\ GO:0090303 \\ GO:0008016 \\ GO:0035313 \\	cell chemotaxis (GO:0060326);cranial nerve development (GO:0021545);epidermal growth factor receptor signaling pathway (GO:0007173);positive regulation of cell proliferation (GO:0008284);positive regulation of keratinocyte migration (GO:0051549);positive regulation of protein kinase B signaling (GO:0051897);positive regulation of smooth muscle cell proliferation (GO:0048661);positive regulation o…	epidermal growth factor receptor binding (GO:0005154);growth factor activity (GO:0008083);heparin binding (GO:0008201);	extracellular space (GO:0005615);integral component of plasma membrane (GO:0005887);	Cell membrane;Complete proteome;Disulfide bond;EGF-like domain;Growth factor;Heparin-binding;Membrane;Receptor;Reference proteome;Secreted;Signal;Transmembrane;Transmembrane helix.;		-0.453676	3.41534	0.593109	1	276	298	287	HBEGF
Locus_102019_Transcript_1/1_Confidence_1.000_Length_1005	1005	Locus_102019_Transcript_1/1_Confidence_1.000_Length_1005	1005	Locus_102019_Transcript_1/1_Confidence_1.000_Length_1005	1005	Q28199	91.617	7.36e-111	CD5R1_BOVIN	Cyclin-dependent kinase 5 activator 1	bta:282173	GO:0030424 \\ GO:0043292 \\ GO:0016533 \\ GO:0005737 \\ GO:0030425 \\ GO:0043197 \\ GO:0030426 \\ GO:0016020 \\ GO:0031594 \\ GO:0043025 \\ GO:0005654 \\ GO:0005634 \\ GO:0048471 \\ GO:0005886 \\ GO:0014069 \\ GO:0045296 \\ GO:0005509 \\ GO:0016534 \\ GO:0016301 \\ GO:0043539 \\ GO:0007411 \\ GO:0007413 \\ GO:0007420 \\ GO:0021549 \\ GO:0009790 \\ GO:0048013 \\ GO:0007213 \\ GO:0021766 \\ GO:0035…	axon guidance (GO:0007411);axonal fasciculation (GO:0007413);brain development (GO:0007420);cerebellum development (GO:0021549);embryo development (GO:0009790);ephrin receptor signaling pathway (GO:0048013);G-protein coupled acetylcholine receptor signaling pathway (GO:0007213);hippocampus development (GO:0021766);ionotropic glutamate receptor signaling pathway (GO:0035235);layer formation in cer…	cadherin binding (GO:0045296);calcium ion binding (GO:0005509);cyclin-dependent protein kinase 5 activator activity (GO:0016534);kinase activity (GO:0016301);protein serine/threonine kinase activator activity (GO:0043539);	axon (GO:0030424);contractile fiber (GO:0043292);cyclin-dependent protein kinase 5 holoenzyme complex (GO:0016533);cytoplasm (GO:0005737);dendrite (GO:0030425);dendritic spine (GO:0043197);growth cone (GO:0030426);membrane (GO:0016020);neuromuscular junction (GO:0031594);neuronal cell body (GO:0043025);nucleoplasm (GO:0005654);nucleus (GO:0005634);perinuclear region of cytoplasm (GO:0048471);plas…	Biological rhythms;Cell membrane;Complete proteome;Cytoplasm;Direct protein sequencing;Lipoprotein;Membrane;Myristate;Nucleus;Phosphoprotein;Reference proteome;Ubl conjugation.;		-0.103847	1.31807	0.920611	1	72	61	66.5	CD5R1
Locus_10202_Transcript_1/1_Confidence_1.000_Length_1229	1229	No_sig_nr_hit	No_sig_nr_hit	No_sig_nr_hit	No_sig_nr_hit	No_Uniprotmatch	No_%_identity	No_evalue	No_ID	No_Description	No_KEGG	No_GO	No_GOCC	No_GOBP	No_GOMF	No_keywords		0.170155	4.05759	0.84344	1	541	379	460	No
Locus_10209_Transcript_1/4_Confidence_0.500_Length_5042	5042	Locus_10209_Transcript_1/4_Confidence_0.500_Length_5042	5042	Locus_10209_Transcript_1/4_Confidence_0.500_Length_5042	5042	Q5W0Q7	36.777	1.06e-128	USPL1_HUMAN	SUMO-specific isopeptidase USPL1	hsa:10208	GO:0015030 \\ GO:0005615 \\ GO:0032183 \\ GO:0070140 \\ GO:0030576 \\ GO:0008283 \\ GO:0016926 \\	Cajal body organization (GO:0030576);cell proliferation (GO:0008283);protein desumoylation (GO:0016926);	SUMO binding (GO:0032183);SUMO-specific isopeptidase activity (GO:0070140);	Cajal body (GO:0015030);extracellular space (GO:0005615);	Alternative splicing;Complete proteome;Hydrolase;Nucleus;Polymorphism;Protease;Reference proteome;Thiol protease.;		0.192658	2.42473	0.832479	1	174	120	147	USPL1
Locus_10209_Transcript_4/4_Confidence_0.500_Length_5113	5113	Locus_10209_Transcript_4/4_Confidence_0.500_Length_5113	5113	Locus_10209_Transcript_4/4_Confidence_0.500_Length_5113	5113	Q5W0Q7	38.197	9.11e-146	USPL1_HUMAN	SUMO-specific isopeptidase USPL1	hsa:10208	GO:0015030 \\ GO:0005615 \\ GO:0032183 \\ GO:0070140 \\ GO:0030576 \\ GO:0008283 \\ GO:0016926 \\	Cajal body organization (GO:0030576);cell proliferation (GO:0008283);protein desumoylation (GO:0016926);	SUMO binding (GO:0032183);SUMO-specific isopeptidase activity (GO:0070140);	Cajal body (GO:0015030);extracellular space (GO:0005615);	Alternative splicing;Complete proteome;Hydrolase;Nucleus;Polymorphism;Protease;Reference proteome;Thiol protease.;		0.0770418	2.54233	0.931203	1	182	136	159	USPL1
Locus_1021_Transcript_3/7_Confidence_0.471_Length_3581	3581	Locus_1021_Transcript_3/7_Confidence_0.471_Length_3581	3581	Locus_1021_Transcript_3/7_Confidence_0.471_Length_3581	3581	Q14558	93.86	0	KPRA_HUMAN	Phosphoribosyl pyrophosphate synthase-associated protein 1	hsa:5635	GO:0002189 \\ GO:0004857 \\ GO:0000287 \\ GO:0004749 \\ GO:0033673 \\ GO:0006139 \\ GO:0009165 \\	negative regulation of kinase activity (GO:0033673);nucleobase-containing compound metabolic process (GO:0006139);nucleotide biosynthetic process (GO:0009165);	enzyme inhibitor activity (GO:0004857);magnesium ion binding (GO:0000287);ribose phosphate diphosphokinase activity (GO:0004749);	ribose phosphate diphosphokinase complex (GO:0002189);	3D-structure;Acetylation;Alternative splicing;Complete proteome;Nucleotide biosynthesis;Phosphoprotein;Reference proteome.;		0.503916	1.4966	0.57647	1	99	55	77	KPRA
Locus_1021_Transcript_4/7_Confidence_0.529_Length_5133	5133	Locus_1021_Transcript_4/7_Confidence_0.529_Length_5133	5133	Locus_1021_Transcript_4/7_Confidence_0.529_Length_5133	5133	Q14558	96.629	0	KPRA_HUMAN	Phosphoribosyl pyrophosphate synthase-associated protein 1	hsa:5635	GO:0002189 \\ GO:0004857 \\ GO:0000287 \\ GO:0004749 \\ GO:0033673 \\ GO:0006139 \\ GO:0009165 \\	negative regulation of kinase activity (GO:0033673);nucleobase-containing compound metabolic process (GO:0006139);nucleotide biosynthetic process (GO:0009165);	enzyme inhibitor activity (GO:0004857);magnesium ion binding (GO:0000287);ribose phosphate diphosphokinase activity (GO:0004749);	ribose phosphate diphosphokinase complex (GO:0002189);	3D-structure;Acetylation;Alternative splicing;Complete proteome;Nucleotide biosynthesis;Phosphoprotein;Reference proteome.;		0.0873472	2.78822	0.920116	1	217	161	189	KPRA
Locus_1021_Transcript_6/7_Confidence_0.118_Length_2154	2154	Locus_1021_Transcript_6/7_Confidence_0.118_Length_2154	2154	Locus_1021_Transcript_6/7_Confidence_0.118_Length_2154	2154	Q8CI15	55.376	8.13e-135	SPHK1_MOUSE	Sphingosine kinase 1	mmu:20698	GO:0030424 \\ GO:0005737 \\ GO:0005829 \\ GO:0005634 \\ GO:0005886 \\ GO:0008021 \\ GO:0005524 \\ GO:0005516 \\ GO:0017050 \\ GO:0003677 \\ GO:0000287 \\ GO:0051721 \\ GO:0008481 \\ GO:0038036 \\ GO:0001568 \\ GO:0007420 \\ GO:0019722 \\ GO:0071363 \\ GO:0070301 \\ GO:0009267 \\ GO:0019371 \\ GO:0007565 \\ GO:0006954 \\ GO:0046834 \\ GO:0043066 \\ GO:0045766 \\ GO:0030307 \\ GO:0030335 \\ GO:0008…	blood vessel development (GO:0001568);brain development (GO:0007420);calcium-mediated signaling (GO:0019722);cellular response to growth factor stimulus (GO:0071363);cellular response to hydrogen peroxide (GO:0070301);cellular response to starvation (GO:0009267);cyclooxygenase pathway (GO:0019371);female pregnancy (GO:0007565);inflammatory response (GO:0006954);lipid phosphorylation (GO:0046834);…	ATP binding (GO:0005524);calmodulin binding (GO:0005516);D-erythro-sphingosine kinase activity (GO:0017050);DNA binding (GO:0003677);magnesium ion binding (GO:0000287);protein phosphatase 2A binding (GO:0051721);sphinganine kinase activity (GO:0008481);sphingosine-1-phosphate receptor activity (GO:0038036);	axon (GO:0030424);cytoplasm (GO:0005737);cytosol (GO:0005829);nucleus (GO:0005634);plasma membrane (GO:0005886);synaptic vesicle (GO:0008021);	Alternative splicing;ATP-binding;Calmodulin-binding;Cell membrane;Complete proteome;Cytoplasm;Kinase;Membrane;Nucleotide-binding;Nucleus;Phosphoprotein;Reference proteome;Transferase.;		-0.709555	2.21099	0.418436	1	107	138	122.5	SPHK1
Locus_10212_Transcript_1/2_Confidence_0.750_Length_1245	1245	Locus_10212_Transcript_1/2_Confidence_0.750_Length_1245	1245	Locus_10212_Transcript_1/2_Confidence_0.750_Length_1245	1245	P57760	64.438	6.12e-152	STK16_RAT	Serine/threonine-protein kinase 16	rno:286927	GO:0005798 \\ GO:0016020 \\ GO:0048471 \\ GO:0005524 \\ GO:0004715 \\ GO:0004672 \\ GO:0004674 \\ GO:0001077 \\ GO:0071560 \\ GO:0045944 \\ GO:0046777 \\ GO:0006366 \\	cellular response to transforming growth factor beta stimulus (GO:0071560);positive regulation of transcription from RNA polymerase II promoter (GO:0045944);protein autophosphorylation (GO:0046777);transcription from RNA polymerase II promoter (GO:0006366);	ATP binding (GO:0005524);non-membrane spanning protein tyrosine kinase activity (GO:0004715);protein kinase activity (GO:0004672);protein serine/threonine kinase activity (GO:0004674);transcriptional activator activity, RNA polymerase II core promoter proximal region sequence-specific binding (GO:0001077);	Golgi-associated vesicle (GO:0005798);membrane (GO:0016020);perinuclear region of cytoplasm (GO:0048471);	ATP-binding;Complete proteome;Cytoplasm;Kinase;Lipoprotein;Membrane;Myristate;Nucleotide-binding;Palmitate;Phosphoprotein;Reference proteome;Serine/threonine-protein kinase;Transferase.;		-0.68976	1.25691	0.448179	1	55	70	62.5	STK16
Locus_10212_Transcript_2/2_Confidence_0.750_Length_1173	1173	Locus_10212_Transcript_2/2_Confidence_0.750_Length_1173	1173	Locus_10212_Transcript_2/2_Confidence_0.750_Length_1173	1173	P57760	69.508	8.45e-158	STK16_RAT	Serine/threonine-protein kinase 16	rno:286927	GO:0005798 \\ GO:0016020 \\ GO:0048471 \\ GO:0005524 \\ GO:0004715 \\ GO:0004672 \\ GO:0004674 \\ GO:0001077 \\ GO:0071560 \\ GO:0045944 \\ GO:0046777 \\ GO:0006366 \\	cellular response to transforming growth factor beta stimulus (GO:0071560);positive regulation of transcription from RNA polymerase II promoter (GO:0045944);protein autophosphorylation (GO:0046777);transcription from RNA polymerase II promoter (GO:0006366);	ATP binding (GO:0005524);non-membrane spanning protein tyrosine kinase activity (GO:0004715);protein kinase activity (GO:0004672);protein serine/threonine kinase activity (GO:0004674);transcriptional activator activity, RNA polymerase II core promoter proximal region sequence-specific binding (GO:0001077);	Golgi-associated vesicle (GO:0005798);membrane (GO:0016020);perinuclear region of cytoplasm (GO:0048471);	ATP-binding;Complete proteome;Cytoplasm;Kinase;Lipoprotein;Membrane;Myristate;Nucleotide-binding;Palmitate;Phosphoprotein;Reference proteome;Serine/threonine-protein kinase;Transferase.;		-0.637013	1.66318	0.476599	1	75	92	83.5	STK16
Locus_10213_Transcript_2/6_Confidence_0.538_Length_6154	6154	Locus_10213_Transcript_2/6_Confidence_0.538_Length_6154	6154	Locus_10213_Transcript_2/6_Confidence_0.538_Length_6154	6154	Q6PFW1	75.27	0	VIP1_HUMAN	Inositol hexakisphosphate and diphosphoinositol-pentakisphosphate kinase 1	hsa:9677	GO:0005737 \\ GO:0005829 \\ GO:0005654 \\ GO:0005886 \\ GO:0003993 \\ GO:0005524 \\ GO:0033857 \\ GO:0052723 \\ GO:0052724 \\ GO:0000832 \\ GO:0000828 \\ GO:0000827 \\ GO:0006020 \\ GO:0043647 \\ GO:0044281 \\	inositol metabolic process (GO:0006020);inositol phosphate metabolic process (GO:0043647);small molecule metabolic process (GO:0044281);	acid phosphatase activity (GO:0003993);ATP binding (GO:0005524);diphosphoinositol-pentakisphosphate kinase activity (GO:0033857);inositol hexakisphosphate 1-kinase activity (GO:0052723);inositol hexakisphosphate 3-kinase activity (GO:0052724);inositol hexakisphosphate 5-kinase activity (GO:0000832);inositol hexakisphosphate kinase activity (GO:0000828);inositol-1,3,4,5,6-pentakisphosphate kinase …	cytoplasm (GO:0005737);cytosol (GO:0005829);nucleoplasm (GO:0005654);plasma membrane (GO:0005886);	Alternative splicing;ATP-binding;Cell membrane;Complete proteome;Cytoplasm;Kinase;Membrane;Nucleotide-binding;Phosphoprotein;Reference proteome;Transferase.;		-0.043544	0.724913	1	1	48	39	43.5	VIP1
Locus_10213_Transcript_6/6_Confidence_0.615_Length_6277	6277	Locus_10213_Transcript_6/6_Confidence_0.615_Length_6277	6277	Locus_10213_Transcript_6/6_Confidence_0.615_Length_6277	6277	Q6PFW1	79.502	0	VIP1_HUMAN	Inositol hexakisphosphate and diphosphoinositol-pentakisphosphate kinase 1	hsa:9677	GO:0005737 \\ GO:0005829 \\ GO:0005654 \\ GO:0005886 \\ GO:0003993 \\ GO:0005524 \\ GO:0033857 \\ GO:0052723 \\ GO:0052724 \\ GO:0000832 \\ GO:0000828 \\ GO:0000827 \\ GO:0006020 \\ GO:0043647 \\ GO:0044281 \\	inositol metabolic process (GO:0006020);inositol phosphate metabolic process (GO:0043647);small molecule metabolic process (GO:0044281);	acid phosphatase activity (GO:0003993);ATP binding (GO:0005524);diphosphoinositol-pentakisphosphate kinase activity (GO:0033857);inositol hexakisphosphate 1-kinase activity (GO:0052723);inositol hexakisphosphate 3-kinase activity (GO:0052724);inositol hexakisphosphate 5-kinase activity (GO:0000832);inositol hexakisphosphate kinase activity (GO:0000828);inositol-1,3,4,5,6-pentakisphosphate kinase …	cytoplasm (GO:0005737);cytosol (GO:0005829);nucleoplasm (GO:0005654);plasma membrane (GO:0005886);	Alternative splicing;ATP-binding;Cell membrane;Complete proteome;Cytoplasm;Kinase;Membrane;Nucleotide-binding;Phosphoprotein;Reference proteome;Transferase.;		0.0525499	0.736901	1	1	50	38	44	VIP1
Locus_10217_Transcript_1/3_Confidence_0.750_Length_2379	2379	Locus_10217_Transcript_1/3_Confidence_0.750_Length_2379	2379	Locus_10217_Transcript_1/3_Confidence_0.750_Length_2379	2379	Q8BTY1	57.773	0	KAT1_MOUSE	Kynurenine--oxoglutarate transaminase 1	mmu:70266	GO:0005737 \\ GO:0005829 \\ GO:0005739 \\ GO:0005654 \\ GO:0047804 \\ GO:0047316 \\ GO:0016212 \\ GO:0047945 \\ GO:0047312 \\ GO:0042803 \\ GO:0030170 \\ GO:0009058 \\ GO:0070189 \\ GO:0097053 \\ GO:0006090 \\	biosynthetic process (GO:0009058);kynurenine metabolic process (GO:0070189);L-kynurenine catabolic process (GO:0097053);pyruvate metabolic process (GO:0006090);	cysteine-S-conjugate beta-lyase activity (GO:0047804);glutamine-phenylpyruvate transaminase activity (GO:0047316);kynurenine-oxoglutarate transaminase activity (GO:0016212);L-glutamine (GO:0047945);L-phenylalanine (GO:0047312);protein homodimerization activity (GO:0042803);pyridoxal phosphate binding (GO:0030170);	cytoplasm (GO:0005737);cytosol (GO:0005829);mitochondrion (GO:0005739);nucleoplasm (GO:0005654);	Aminotransferase;Complete proteome;Cytoplasm;Lyase;Pyridoxal phosphate;Reference proteome;Transferase.;		0.3037	2.88587	0.725814	1	249	159	204	KAT1
Locus_10217_Transcript_2/3_Confidence_0.750_Length_2217	2217	Locus_10217_Transcript_2/3_Confidence_0.750_Length_2217	2217	Locus_10217_Transcript_2/3_Confidence_0.750_Length_2217	2217	Q16773	64.929	0	KAT1_HUMAN	Kynurenine--oxoglutarate transaminase 1	hsa:883	GO:0005737 \\ GO:0005829 \\ GO:0005654 \\ GO:0047804 \\ GO:0047316 \\ GO:0016212 \\ GO:0047945 \\ GO:0047312 \\ GO:0042803 \\ GO:0030170 \\ GO:0008483 \\ GO:0008652 \\ GO:0006575 \\ GO:0034641 \\ GO:0070189 \\ GO:0097053 \\ GO:0006559 \\ GO:0044281 \\ GO:0006569 \\	cellular amino acid biosynthetic process (GO:0008652);cellular modified amino acid metabolic process (GO:0006575);cellular nitrogen compound metabolic process (GO:0034641);kynurenine metabolic process (GO:0070189);L-kynurenine catabolic process (GO:0097053);L-phenylalanine catabolic process (GO:0006559);small molecule metabolic process (GO:0044281);tryptophan catabolic process (GO:0006569);	cysteine-S-conjugate beta-lyase activity (GO:0047804);glutamine-phenylpyruvate transaminase activity (GO:0047316);kynurenine-oxoglutarate transaminase activity (GO:0016212);L-glutamine (GO:0047945);L-phenylalanine (GO:0047312);protein homodimerization activity (GO:0042803);pyridoxal phosphate binding (GO:0030170);transaminase activity (GO:0008483);	cytoplasm (GO:0005737);cytosol (GO:0005829);nucleoplasm (GO:0005654);	3D-structure;Alternative splicing;Aminotransferase;Complete proteome;Cytoplasm;Lyase;Pyridoxal phosphate;Reference proteome;Transferase.;		0.266327	2.81977	0.754207	1	235	154	194.5	KAT1
Locus_10219_Transcript_1/4_Confidence_0.667_Length_5337	5337	Locus_10219_Transcript_1/4_Confidence_0.667_Length_5337	5337	Locus_10219_Transcript_1/4_Confidence_0.667_Length_5337	5337	Q86YT6	97.813	0	MIB1_HUMAN	E3 ubiquitin-protein ligase MIB1	hsa:57534	GO:0005813 \\ GO:0005737 \\ GO:0031410 \\ GO:0005829 \\ GO:0005886 \\ GO:0014069 \\ GO:0016874 \\ GO:0004842 \\ GO:0008270 \\ GO:0001568 \\ GO:0006897 \\ GO:0001947 \\ GO:0001701 \\ GO:0045665 \\ GO:0001841 \\ GO:0007219 \\ GO:0045807 \\ GO:0001756 \\	blood vessel development (GO:0001568);endocytosis (GO:0006897);heart looping (GO:0001947);in utero embryonic development (GO:0001701);negative regulation of neuron differentiation (GO:0045665);neural tube formation (GO:0001841);Notch signaling pathway (GO:0007219);positive regulation of endocytosis (GO:0045807);somitogenesis (GO:0001756);	ligase activity (GO:0016874);ubiquitin-protein transferase activity (GO:0004842);zinc ion binding (GO:0008270);	centrosome (GO:0005813);cytoplasm (GO:0005737);cytoplasmic vesicle (GO:0031410);cytosol (GO:0005829);plasma membrane (GO:0005886);postsynaptic density (GO:0014069);	3D-structure;ANK repeat;Cell membrane;Coiled coil;Complete proteome;Cytoplasm;Cytoskeleton;Disease mutation;Ligase;Membrane;Metal-binding;Notch signaling pathway;Phosphoprotein;Polymorphism;Reference proteome;Repeat;Ubl conjugation;Ubl conjugation pathway;Zinc;Zinc-finger.;		0.141826	0.853547	0.890865	1	56	40	48	MIB1
Locus_10219_Transcript_3/4_Confidence_0.667_Length_5343	5343	Locus_10219_Transcript_3/4_Confidence_0.667_Length_5343	5343	Locus_10219_Transcript_3/4_Confidence_0.667_Length_5343	5343	Q80SY4	98.211	0	MIB1_MOUSE	E3 ubiquitin-protein ligase MIB1	mmu:225164	GO:0005813 \\ GO:0031410 \\ GO:0005886 \\ GO:0014069 \\ GO:0016874 \\ GO:0004842 \\ GO:0008270 \\ GO:0001568 \\ GO:0006897 \\ GO:0007507 \\ GO:0001947 \\ GO:0001701 \\ GO:0045665 \\ GO:0001841 \\ GO:0007219 \\ GO:0045807 \\ GO:0001756 \\	blood vessel development (GO:0001568);endocytosis (GO:0006897);heart development (GO:0007507);heart looping (GO:0001947);in utero embryonic development (GO:0001701);negative regulation of neuron differentiation (GO:0045665);neural tube formation (GO:0001841);Notch signaling pathway (GO:0007219);positive regulation of endocytosis (GO:0045807);somitogenesis (GO:0001756);	ligase activity (GO:0016874);ubiquitin-protein transferase activity (GO:0004842);zinc ion binding (GO:0008270);	centrosome (GO:0005813);cytoplasmic vesicle (GO:0031410);plasma membrane (GO:0005886);postsynaptic density (GO:0014069);	ANK repeat;Cell membrane;Coiled coil;Complete proteome;Cytoplasm;Cytoskeleton;Ligase;Membrane;Metal-binding;Notch signaling pathway;Phosphoprotein;Reference proteome;Repeat;Ubl conjugation;Ubl conjugation pathway;Zinc;Zinc-finger.;		0.156801	0.895531	0.867692	1	58	41	49.5	MIB1
Locus_10219_Transcript_4/4_Confidence_0.667_Length_5370	5370	Locus_10219_Transcript_4/4_Confidence_0.667_Length_5370	5370	Locus_10219_Transcript_4/4_Confidence_0.667_Length_5370	5370	Q86YT6	98.807	0	MIB1_HUMAN	E3 ubiquitin-protein ligase MIB1	hsa:57534	GO:0005813 \\ GO:0005737 \\ GO:0031410 \\ GO:0005829 \\ GO:0005886 \\ GO:0014069 \\ GO:0016874 \\ GO:0004842 \\ GO:0008270 \\ GO:0001568 \\ GO:0006897 \\ GO:0001947 \\ GO:0001701 \\ GO:0045665 \\ GO:0001841 \\ GO:0007219 \\ GO:0045807 \\ GO:0001756 \\	blood vessel development (GO:0001568);endocytosis (GO:0006897);heart looping (GO:0001947);in utero embryonic development (GO:0001701);negative regulation of neuron differentiation (GO:0045665);neural tube formation (GO:0001841);Notch signaling pathway (GO:0007219);positive regulation of endocytosis (GO:0045807);somitogenesis (GO:0001756);	ligase activity (GO:0016874);ubiquitin-protein transferase activity (GO:0004842);zinc ion binding (GO:0008270);	centrosome (GO:0005813);cytoplasm (GO:0005737);cytoplasmic vesicle (GO:0031410);cytosol (GO:0005829);plasma membrane (GO:0005886);postsynaptic density (GO:0014069);	3D-structure;ANK repeat;Cell membrane;Coiled coil;Complete proteome;Cytoplasm;Cytoskeleton;Disease mutation;Ligase;Membrane;Metal-binding;Notch signaling pathway;Phosphoprotein;Polymorphism;Reference proteome;Repeat;Ubl conjugation;Ubl conjugation pathway;Zinc;Zinc-finger.;		0.462763	0.721178	0.622775	1	56	32	44	MIB1
Locus_1022_Transcript_2/4_Confidence_0.700_Length_8056	8056	Locus_1022_Transcript_2/4_Confidence_0.700_Length_8056	8056	Locus_1022_Transcript_2/4_Confidence_0.700_Length_8056	8056	Q5R8X7	81.066	0	M3K13_PONAB	Mitogen-activated protein kinase kinase kinase 13	pon:100172983	GO:0005737 \\ GO:0016020 \\ GO:0005524 \\ GO:0004709 \\ GO:0046872 \\ GO:0042803 \\ GO:0004674 \\ GO:0000186 \\ GO:0007254 \\ GO:0051092 \\ GO:0046777 \\ GO:0006468 \\	activation of MAPKK activity (GO:0000186);JNK cascade (GO:0007254);positive regulation of NF-kappaB transcription factor activity (GO:0051092);protein autophosphorylation (GO:0046777);protein phosphorylation (GO:0006468);	ATP binding (GO:0005524);MAP kinase kinase kinase activity (GO:0004709);metal ion binding (GO:0046872);protein homodimerization activity (GO:0042803);protein serine/threonine kinase activity (GO:0004674);	cytoplasm (GO:0005737);membrane (GO:0016020);	ATP-binding;Complete proteome;Cytoplasm;Kinase;Magnesium;Membrane;Metal-binding;Nucleotide-binding;Phosphoprotein;Reference proteome;Repeat;Serine/threonine-protein kinase;Transferase.;		-0.221967	6.62962	0.790596	1	2816	2589	2702.5	M3K13
Locus_1022_Transcript_3/4_Confidence_0.400_Length_752	752	Locus_1022_Transcript_3/4_Confidence_0.400_Length_752	752	Locus_1022_Transcript_3/4_Confidence_0.400_Length_752	752	Q96HV5	77.778	4.46e-60	TM41A_HUMAN	Transmembrane protein 41A	hsa:90407	GO:0016021 \\	No_GOBP	No_GOMF	integral component of membrane (GO:0016021);	Complete proteome;Glycoprotein;Membrane;Reference proteome;Signal;Transmembrane;Transmembrane helix.;		-1.17606	3.31965	0.171191	1	188	335	261.5	TM41A
Locus_10220_Transcript_1/1_Confidence_1.000_Length_1068	1068	Locus_10220_Transcript_1/1_Confidence_1.000_Length_1068	1068	Locus_10220_Transcript_1/1_Confidence_1.000_Length_1068	1068	O54984	95.899	0	ASNA_MOUSE	ATPase Asna1 {ECO:0000255|HAMAP-Rule:MF_03112}	mmu:56495	GO:0005783 \\ GO:0070062 \\ GO:0005730 \\ GO:0005634 \\ GO:0005524 \\ GO:0016887 \\ GO:0046872 \\ GO:0045048 \\ GO:0006810 \\	protein insertion into ER membrane (GO:0045048);transport (GO:0006810);	ATP binding (GO:0005524);ATPase activity (GO:0016887);metal ion binding (GO:0046872);	endoplasmic reticulum (GO:0005783);extracellular exosome (GO:0070062);nucleolus (GO:0005730);nucleus (GO:0005634);	Acetylation;ATP-binding;Complete proteome;Cytoplasm;Direct protein sequencing;Endoplasmic reticulum;Hydrolase;Metal-binding;Nucleotide-binding;Nucleus;Reference proteome;Transport;Zinc.;		-0.952932	4.32543	0.260888	1	420	641	530.5	ASNA
Locus_10223_Transcript_2/4_Confidence_0.667_Length_3185	3185	Locus_10223_Transcript_2/4_Confidence_0.667_Length_3185	3185	Locus_10223_Transcript_2/4_Confidence_0.667_Length_3185	3185	A0JN62	73.067	3.43e-180	CE120_BOVIN	Centrosomal protein of 120 kDa	bta:534400	GO:0005813 \\ GO:0005737 \\ GO:0030953 \\ GO:0021987 \\ GO:0022027 \\ GO:0022008 \\ GO:0032886 \\ GO:0032880 \\	astral microtubule organization (GO:0030953);cerebral cortex development (GO:0021987);interkinetic nuclear migration (GO:0022027);neurogenesis (GO:0022008);regulation of microtubule-based process (GO:0032886);regulation of protein localization (GO:0032880);	No_GOMF	centrosome (GO:0005813);cytoplasm (GO:0005737);	Alternative splicing;Coiled coil;Complete proteome;Cytoplasm;Cytoskeleton;Phosphoprotein;Reference proteome.;		0.655481	1.3062	0.474416	1	90	45	67.5	CE120
Locus_10223_Transcript_3/4_Confidence_0.667_Length_4848	4848	Locus_10223_Transcript_3/4_Confidence_0.667_Length_4848	4848	Locus_10223_Transcript_3/4_Confidence_0.667_Length_4848	4848	Q8N960	70.068	0	CE120_HUMAN	Centrosomal protein of 120 kDa	hsa:153241	GO:0005813 \\ GO:0005737 \\ GO:0030953 \\ GO:0021987 \\ GO:0022027 \\ GO:0022008 \\ GO:0032886 \\ GO:0032880 \\	astral microtubule organization (GO:0030953);cerebral cortex development (GO:0021987);interkinetic nuclear migration (GO:0022027);neurogenesis (GO:0022008);regulation of microtubule-based process (GO:0032886);regulation of protein localization (GO:0032880);	No_GOMF	centrosome (GO:0005813);cytoplasm (GO:0005737);	3D-structure;Alternative splicing;Ciliopathy;Coiled coil;Complete proteome;Cytoplasm;Cytoskeleton;Disease mutation;Phosphoprotein;Polymorphism;Reference proteome.;		0.793052	1.67151	0.367874	1	121	55	88	CE120
Locus_10224_Transcript_1/10_Confidence_0.440_Length_3070	3070	Locus_10224_Transcript_1/10_Confidence_0.440_Length_3070	3070	Locus_10224_Transcript_1/10_Confidence_0.440_Length_3070	3070	Q5ZMJ9	100	2.44e-70	SRRM1_CHICK	Serine/arginine repetitive matrix protein 1	gga:428216	GO:0005634 \\ GO:0006397 \\ GO:0008380 \\	mRNA processing (GO:0006397);RNA splicing (GO:0008380);	No_GOMF	nucleus (GO:0005634);	Complete proteome;mRNA processing;mRNA splicing;Nucleus;Reference proteome.;		0.454204	1.21833	0.62728	1	80	46	63	SRRM1
Locus_10224_Transcript_2/10_Confidence_0.600_Length_4765	4765	Locus_10224_Transcript_2/10_Confidence_0.600_Length_4765	4765	Locus_10224_Transcript_2/10_Confidence_0.600_Length_4765	4765	Q5ZMJ9	100	2.29e-35	SRRM1_CHICK	Serine/arginine repetitive matrix protein 1	gga:428216	GO:0005634 \\ GO:0006397 \\ GO:0008380 \\	mRNA processing (GO:0006397);RNA splicing (GO:0008380);	No_GOMF	nucleus (GO:0005634);	Complete proteome;mRNA processing;mRNA splicing;Nucleus;Reference proteome.;		0.235488	1.89058	0.798746	1	121	81	101	SRRM1
Locus_10224_Transcript_3/10_Confidence_0.280_Length_2037	2037	Locus_10224_Transcript_3/10_Confidence_0.280_Length_2037	2037	Locus_10224_Transcript_3/10_Confidence_0.280_Length_2037	2037	Q5ZMJ9	95.652	1.37e-15	SRRM1_CHICK	Serine/arginine repetitive matrix protein 1	gga:428216	GO:0005634 \\ GO:0006397 \\ GO:0008380 \\	mRNA processing (GO:0006397);RNA splicing (GO:0008380);	No_GOMF	nucleus (GO:0005634);	Complete proteome;mRNA processing;mRNA splicing;Nucleus;Reference proteome.;		1.09868	1.73667	0.210934	1	136	50	93	SRRM1
Locus_10224_Transcript_4/10_Confidence_0.480_Length_3704	3704	Locus_10224_Transcript_4/10_Confidence_0.480_Length_3704	3704	Locus_10224_Transcript_4/10_Confidence_0.480_Length_3704	3704	Q5ZMJ9	100	1.21e-68	SRRM1_CHICK	Serine/arginine repetitive matrix protein 1	gga:428216	GO:0005634 \\ GO:0006397 \\ GO:0008380 \\	mRNA processing (GO:0006397);RNA splicing (GO:0008380);	No_GOMF	nucleus (GO:0005634);	Complete proteome;mRNA processing;mRNA splicing;Nucleus;Reference proteome.;		0.463606	2.06939	0.599257	1	147	84	115.5	SRRM1
Locus_10224_Transcript_5/10_Confidence_0.600_Length_3795	3795	Locus_10224_Transcript_5/10_Confidence_0.600_Length_3795	3795	Locus_10224_Transcript_5/10_Confidence_0.600_Length_3795	3795	Q5ZMJ9	74.096	5.2e-62	SRRM1_CHICK	Serine/arginine repetitive matrix protein 1	gga:428216	GO:0005634 \\ GO:0006397 \\ GO:0008380 \\	mRNA processing (GO:0006397);RNA splicing (GO:0008380);	No_GOMF	nucleus (GO:0005634);	Complete proteome;mRNA processing;mRNA splicing;Nucleus;Reference proteome.;		0.406349	2.10241	0.647752	1	148	88	118	SRRM1
Locus_10224_Transcript_6/10_Confidence_0.640_Length_5778	5778	Locus_10224_Transcript_6/10_Confidence_0.640_Length_5778	5778	Locus_10224_Transcript_6/10_Confidence_0.640_Length_5778	5778	Q5ZMJ9	100	3.09e-35	SRRM1_CHICK	Serine/arginine repetitive matrix protein 1	gga:428216	GO:0005634 \\ GO:0006397 \\ GO:0008380 \\	mRNA processing (GO:0006397);RNA splicing (GO:0008380);	No_GOMF	nucleus (GO:0005634);	Complete proteome;mRNA processing;mRNA splicing;Nucleus;Reference proteome.;		0.638147	2.1212	0.463762	1	160	81	120.5	SRRM1
Locus_10224_Transcript_8/10_Confidence_0.320_Length_3753	3753	Locus_10224_Transcript_8/10_Confidence_0.320_Length_3753	3753	Locus_10224_Transcript_8/10_Confidence_0.320_Length_3753	3753	Q5ZMJ9	100	7.13e-70	SRRM1_CHICK	Serine/arginine repetitive matrix protein 1	gga:428216	GO:0005634 \\ GO:0006397 \\ GO:0008380 \\	mRNA processing (GO:0006397);RNA splicing (GO:0008380);	No_GOMF	nucleus (GO:0005634);	Complete proteome;mRNA processing;mRNA splicing;Nucleus;Reference proteome.;		0.485165	0.501592	0.596526	1	48	27	37.5	SRRM1
Locus_10226_Transcript_2/6_Confidence_0.667_Length_2281	2281	Locus_10226_Transcript_2/6_Confidence_0.667_Length_2281	2281	Locus_10226_Transcript_2/6_Confidence_0.667_Length_2281	2281	Q640Z9	38.066	2.91e-73	LRC14_XENLA	Leucine-rich repeat-containing protein 14	xla:447755	No_GOcodes	No_GOBP	No_GOMF	No_GOCC	Leucine-rich repeat;Repeat.;		-0.628163	1.61977	0.486748	1	73	89	81	LRC14
Locus_102265_Transcript_1/1_Confidence_1.000_Length_514	514	No_sig_nr_hit	No_sig_nr_hit	No_sig_nr_hit	No_sig_nr_hit	No_Uniprotmatch	No_%_identity	No_evalue	No_ID	No_Description	No_KEGG	No_GO	No_GOCC	No_GOBP	No_GOMF	No_keywords		-1.48086	-0.126766	0.130526	1	14	31	22.5	No
Locus_10228_Transcript_1/1_Confidence_1.000_Length_2971	2971	Locus_10228_Transcript_1/1_Confidence_1.000_Length_2971	2971	Locus_10228_Transcript_1/1_Confidence_1.000_Length_2971	2971	Q15477	58.649	0	SKIV2_HUMAN	Helicase SKI2W	hsa:6499	GO:0005654 \\ GO:0005634 \\ GO:0055087 \\ GO:0005524 \\ GO:0004004 \\ GO:0003723 \\ GO:0006401 \\	RNA catabolic process (GO:0006401);	ATP binding (GO:0005524);ATP-dependent RNA helicase activity (GO:0004004);RNA binding (GO:0003723);	nucleoplasm (GO:0005654);nucleus (GO:0005634);Ski complex (GO:0055087);	ATP-binding;Complete proteome;Cytoplasm;Disease mutation;Helicase;Hydrolase;Nucleotide-binding;Nucleus;Phosphoprotein;Polymorphism;Reference proteome;RNA-binding.;		-0.317759	4.38839	0.707635	1	573	563	568	SKIV2
Locus_10229_Transcript_1/1_Confidence_1.000_Length_1244	1244	No_sig_nr_hit	No_sig_nr_hit	No_sig_nr_hit	No_sig_nr_hit	No_Uniprotmatch	No_%_identity	No_evalue	No_ID	No_Description	No_KEGG	No_GO	No_GOCC	No_GOBP	No_GOMF	No_keywords		0.457683	3.04293	0.594771	1	291	167	229	No
Locus_102293_Transcript_1/1_Confidence_1.000_Length_365	365	Locus_102293_Transcript_1/1_Confidence_1.000_Length_365	365	Locus_102293_Transcript_1/1_Confidence_1.000_Length_365	365	Q9NQZ8	60.169	1.01e-44	ZNF71_HUMAN	Endothelial zinc finger protein induced by tumor necrosis factor alpha	hsa:58491	GO:0005634 \\ GO:0003677 \\ GO:0046872 \\ GO:0003700 \\ GO:0006355 \\ GO:0006351 \\	regulation of transcription, DNA-templated (GO:0006355);transcription, DNA-templated (GO:0006351);	DNA binding (GO:0003677);metal ion binding (GO:0046872);transcription factor activity, sequence-specific DNA binding (GO:0003700);	nucleus (GO:0005634);	Complete proteome;DNA-binding;Metal-binding;Nucleus;Polymorphism;Reference proteome;Repeat;Transcription;Transcription regulation;Zinc;Zinc-finger.;		0.770058	0.815155	0.409664	1	65	30	47.5	ZNF71
Locus_1023_Transcript_2/6_Confidence_0.364_Length_1125	1125	Locus_1023_Transcript_2/6_Confidence_0.364_Length_1125	1125	Locus_1023_Transcript_2/6_Confidence_0.364_Length_1125	1125	O60688	100	5.33e-59	YPEL1_HUMAN	Protein yippee-like 1	hsa:29799	GO:0005634 \\	No_GOBP	No_GOMF	nucleus (GO:0005634);	Complete proteome;Metal-binding;Nucleus;Reference proteome;Zinc.;		-0.10689	0.892206	0.92041	1	53	45	49	YPEL1
Locus_1023_Transcript_5/6_Confidence_0.273_Length_2536	2536	Locus_1023_Transcript_5/6_Confidence_0.273_Length_2536	2536	Locus_1023_Transcript_5/6_Confidence_0.273_Length_2536	2536	O60688	97.5	2.46e-18	YPEL1_HUMAN	Protein yippee-like 1	hsa:29799	GO:0005634 \\	No_GOBP	No_GOMF	nucleus (GO:0005634);	Complete proteome;Metal-binding;Nucleus;Reference proteome;Zinc.;		1.85598	3.2533	0.0344629	1	455	99	277	YPEL1
Locus_1023_Transcript_6/6_Confidence_0.545_Length_6054	6054	Locus_1023_Transcript_6/6_Confidence_0.545_Length_6054	6054	Locus_1023_Transcript_6/6_Confidence_0.545_Length_6054	6054	O60688	100	1.21e-75	YPEL1_HUMAN	Protein yippee-like 1	hsa:29799	GO:0005634 \\	No_GOBP	No_GOMF	nucleus (GO:0005634);	Complete proteome;Metal-binding;Nucleus;Reference proteome;Zinc.;		1.54854	7.26288	0.0692335	1	7051	1900	4475.5	YPEL1
Locus_10231_Transcript_1/5_Confidence_0.583_Length_3229	3229	Locus_10231_Transcript_1/5_Confidence_0.583_Length_3229	3229	Locus_10231_Transcript_1/5_Confidence_0.583_Length_3229	3229	A3KG59	74.57	8.07e-165	P20D2_MOUSE	Peptidase M20 domain-containing protein 2	mmu:242377	GO:0070062 \\ GO:0005654 \\ GO:0016787 \\	No_GOBP	hydrolase activity (GO:0016787);	extracellular exosome (GO:0070062);nucleoplasm (GO:0005654);	Alternative splicing;Complete proteome;Reference proteome.;		0.603332	3.12025	0.481163	1	320	166	243	P20D2
Locus_10231_Transcript_4/5_Confidence_0.583_Length_3295	3295	Locus_10231_Transcript_4/5_Confidence_0.583_Length_3295	3295	Locus_10231_Transcript_4/5_Confidence_0.583_Length_3295	3295	Q501L1	70.958	2.05e-158	P20D2_XENTR	Peptidase M20 domain-containing protein 2	xtr:613074	No_GOcodes	No_GOBP	No_GOMF	No_GOCC	Complete proteome;Reference proteome.;		0.403963	3.21888	0.633502	1	324	193	258.5	P20D2
Locus_10231_Transcript_5/5_Confidence_0.583_Length_3159	3159	Locus_10231_Transcript_5/5_Confidence_0.583_Length_3159	3159	Locus_10231_Transcript_5/5_Confidence_0.583_Length_3159	3159	A3KG59	75	0	P20D2_MOUSE	Peptidase M20 domain-containing protein 2	mmu:242377	GO:0070062 \\ GO:0005654 \\ GO:0016787 \\	No_GOBP	hydrolase activity (GO:0016787);	extracellular exosome (GO:0070062);nucleoplasm (GO:0005654);	Alternative splicing;Complete proteome;Reference proteome.;		0.319161	3.12608	0.712047	1	296	187	241.5	P20D2
Locus_10232_Transcript_1/3_Confidence_0.714_Length_4549	4549	Locus_10232_Transcript_1/3_Confidence_0.714_Length_4549	4549	Locus_10232_Transcript_1/3_Confidence_0.714_Length_4549	4549	O95786	53.498	0	DDX58_HUMAN	Probable ATP-dependent RNA helicase DDX58	hsa:23586	GO:0015629 \\ GO:0005923 \\ GO:0005737 \\ GO:0005829 \\ GO:0032587 \\ GO:0005524 \\ GO:0003690 \\ GO:0003725 \\ GO:0004386 \\ GO:0042802 \\ GO:0003727 \\ GO:0008270 \\ GO:0039528 \\ GO:0009597 \\ GO:0045087 \\ GO:0032480 \\ GO:0002230 \\ GO:0010628 \\ GO:0032725 \\ GO:0032727 \\ GO:0032728 \\ GO:0032755 \\ GO:0032757 \\ GO:0051091 \\ GO:0042993 \\ GO:0045944 \\ GO:0030334 \\ GO:0034344 \\ GO:0043…	cytoplasmic pattern recognition receptor signaling pathway in response to virus (GO:0039528);detection of virus (GO:0009597);innate immune response (GO:0045087);negative regulation of type I interferon production (GO:0032480);positive regulation of defense response to virus by host (GO:0002230);positive regulation of gene expression (GO:0010628);positive regulation of granulocyte macrophage colon…	ATP binding (GO:0005524);double-stranded DNA binding (GO:0003690);double-stranded RNA binding (GO:0003725);helicase activity (GO:0004386);identical protein binding (GO:0042802);single-stranded RNA binding (GO:0003727);zinc ion binding (GO:0008270);	actin cytoskeleton (GO:0015629);bicellular tight junction (GO:0005923);cytoplasm (GO:0005737);cytosol (GO:0005829);ruffle membrane (GO:0032587);	3D-structure;Acetylation;Alternative splicing;Antiviral defense;ATP-binding;Cell junction;Cell membrane;Cell projection;Complete proteome;Cytoplasm;Cytoskeleton;Disease mutation;Helicase;Host-virus interaction;Hydrolase;Immunity;Innate immunity;Isopeptide bond;Membrane;Metal-binding;Nucleotide-binding;Phosphoprotein;Polymorphism;Reference proteome;Repeat;RNA-binding;Tight junction;Ubl conjugation…		0.461735	3.76938	0.58555	1	484	277	380.5	DDX58
Locus_10233_Transcript_1/1_Confidence_1.000_Length_422	422	No_sig_nr_hit	No_sig_nr_hit	No_sig_nr_hit	No_sig_nr_hit	No_Uniprotmatch	No_%_identity	No_evalue	No_ID	No_Description	No_KEGG	No_GO	No_GOCC	No_GOBP	No_GOMF	No_keywords		0.208836	1.05213	0.834328	1	66	45	55.5	No
Locus_10234_Transcript_4/5_Confidence_0.636_Length_3261	3261	Locus_10234_Transcript_4/5_Confidence_0.636_Length_3261	3261	Locus_10234_Transcript_4/5_Confidence_0.636_Length_3261	3261	Q6PE15	67.925	7.27e-93	ABHDA_MOUSE	Mycophenolic acid acyl-glucuronide esterase, mitochondrial	mmu:213012	GO:0005829 \\ GO:0005739 \\ GO:0004553 \\ GO:0019391 \\	glucuronoside catabolic process (GO:0019391);	hydrolase activity, hydrolyzing O-glycosyl compounds (GO:0004553);	cytosol (GO:0005829);mitochondrion (GO:0005739);	Alternative splicing;Complete proteome;Hydrolase;Mitochondrion;Reference proteome;Transit peptide.;		0.453251	1.61251	0.621119	1	106	61	83.5	ABHDA
Locus_10234_Transcript_5/5_Confidence_0.545_Length_3149	3149	Locus_10234_Transcript_5/5_Confidence_0.545_Length_3149	3149	Locus_10234_Transcript_5/5_Confidence_0.545_Length_3149	3149	Q6PE15	68.504	8.49e-114	ABHDA_MOUSE	Mycophenolic acid acyl-glucuronide esterase, mitochondrial	mmu:213012	GO:0005829 \\ GO:0005739 \\ GO:0004553 \\ GO:0019391 \\	glucuronoside catabolic process (GO:0019391);	hydrolase activity, hydrolyzing O-glycosyl compounds (GO:0004553);	cytosol (GO:0005829);mitochondrion (GO:0005739);	Alternative splicing;Complete proteome;Hydrolase;Mitochondrion;Reference proteome;Transit peptide.;		0.0367471	1.63995	0.983938	1	95	73	84	ABHDA
Locus_10235_Transcript_1/2_Confidence_0.750_Length_2886	2886	Locus_10235_Transcript_1/2_Confidence_0.750_Length_2886	2886	Locus_10235_Transcript_1/2_Confidence_0.750_Length_2886	2886	Q6ZMT4	80.089	0	KDM7A_HUMAN	Lysine-specific demethylase 7A	hsa:80853	GO:0005730 \\ GO:0005654 \\ GO:0005634 \\ GO:0071558 \\ GO:0051864 \\ GO:0032454 \\ GO:0035575 \\ GO:0005506 \\ GO:0035064 \\ GO:0016706 \\ GO:0008270 \\ GO:0006325 \\ GO:0071557 \\ GO:0070544 \\ GO:0033169 \\ GO:0035574 \\ GO:0030901 \\ GO:0045893 \\ GO:0006351 \\	chromatin organization (GO:0006325);histone H3-K27 demethylation (GO:0071557);histone H3-K36 demethylation (GO:0070544);histone H3-K9 demethylation (GO:0033169);histone H4-K20 demethylation (GO:0035574);midbrain development (GO:0030901);positive regulation of transcription, DNA-templated (GO:0045893);transcription, DNA-templated (GO:0006351);	histone demethylase activity (H3-K27 specific) (GO:0071558);histone demethylase activity (H3-K36 specific) (GO:0051864);histone demethylase activity (H3-K9 specific) (GO:0032454);histone demethylase activity (H4-K20 specific) (GO:0035575);iron ion binding (GO:0005506);methylated histone binding (GO:0035064);oxidoreductase activity, acting on paired donors, with incorporation or reduction of molec…	nucleolus (GO:0005730);nucleoplasm (GO:0005654);nucleus (GO:0005634);	3D-structure;Alternative splicing;Chromatin regulator;Complete proteome;Dioxygenase;Iron;Metal-binding;Neurogenesis;Nucleus;Oxidoreductase;Polymorphism;Reference proteome;Transcription;Transcription regulation;Zinc;Zinc-finger.;		0.699361	5.05972	0.40584	1	1269	616	942.5	KDM7A
Locus_10235_Transcript_2/2_Confidence_0.500_Length_1174	1174	Locus_10235_Transcript_2/2_Confidence_0.500_Length_1174	1174	Locus_10235_Transcript_2/2_Confidence_0.500_Length_1174	1174	Q6ZMT4	94.012	0	KDM7A_HUMAN	Lysine-specific demethylase 7A	hsa:80853	GO:0005730 \\ GO:0005654 \\ GO:0005634 \\ GO:0071558 \\ GO:0051864 \\ GO:0032454 \\ GO:0035575 \\ GO:0005506 \\ GO:0035064 \\ GO:0016706 \\ GO:0008270 \\ GO:0006325 \\ GO:0071557 \\ GO:0070544 \\ GO:0033169 \\ GO:0035574 \\ GO:0030901 \\ GO:0045893 \\ GO:0006351 \\	chromatin organization (GO:0006325);histone H3-K27 demethylation (GO:0071557);histone H3-K36 demethylation (GO:0070544);histone H3-K9 demethylation (GO:0033169);histone H4-K20 demethylation (GO:0035574);midbrain development (GO:0030901);positive regulation of transcription, DNA-templated (GO:0045893);transcription, DNA-templated (GO:0006351);	histone demethylase activity (H3-K27 specific) (GO:0071558);histone demethylase activity (H3-K36 specific) (GO:0051864);histone demethylase activity (H3-K9 specific) (GO:0032454);histone demethylase activity (H4-K20 specific) (GO:0035575);iron ion binding (GO:0005506);methylated histone binding (GO:0035064);oxidoreductase activity, acting on paired donors, with incorporation or reduction of molec…	nucleolus (GO:0005730);nucleoplasm (GO:0005654);nucleus (GO:0005634);	3D-structure;Alternative splicing;Chromatin regulator;Complete proteome;Dioxygenase;Iron;Metal-binding;Neurogenesis;Nucleus;Oxidoreductase;Polymorphism;Reference proteome;Transcription;Transcription regulation;Zinc;Zinc-finger.;		-0.182344	1.03046	0.879224	1	57	51	54	KDM7A
Locus_10236_Transcript_1/1_Confidence_1.000_Length_1683	1683	Locus_10236_Transcript_1/1_Confidence_1.000_Length_1683	1683	Locus_10236_Transcript_1/1_Confidence_1.000_Length_1683	1683	Q1T769	73.558	2.04e-77	MIS12_CHICK	Protein MIS12 homolog	gga:693254	GO:0000444 \\ GO:0000818 \\ GO:0051301 \\ GO:0007059 \\ GO:0051382 \\ GO:0000070 \\ GO:0007052 \\ GO:0034501 \\	cell division (GO:0051301);chromosome segregation (GO:0007059);kinetochore assembly (GO:0051382);mitotic sister chromatid segregation (GO:0000070);mitotic spindle organization (GO:0007052);protein localization to kinetochore (GO:0034501);	No_GOMF	MIS12/MIND type complex (GO:0000444);nuclear MIS12/MIND complex (GO:0000818);	Cell cycle;Cell division;Centromere;Chromosome;Chromosome partition;Coiled coil;Complete proteome;Kinetochore;Mitosis;Reference proteome.;		0.39321	1.81153	0.654067	1	120	72	96	MIS12
Locus_102371_Transcript_1/1_Confidence_1.000_Length_345	345	No_sig_nr_hit	No_sig_nr_hit	No_sig_nr_hit	No_sig_nr_hit	No_Uniprotmatch	No_%_identity	No_evalue	No_ID	No_Description	No_KEGG	No_GO	No_GOCC	No_GOBP	No_GOMF	No_keywords		0.590924	-0.514117	0.661955	1	23	12	17.5	No
Locus_10238_Transcript_1/3_Confidence_0.714_Length_4996	4996	Locus_10238_Transcript_1/3_Confidence_0.714_Length_4996	4996	Locus_10238_Transcript_1/3_Confidence_0.714_Length_4996	4996	Q96DB2	85.581	4.74e-124	HDA11_HUMAN	Histone deacetylase 11	hsa:79885	GO:0070062 \\ GO:0000118 \\ GO:0005634 \\ GO:0005886 \\ GO:0004407 \\ GO:0032041 \\ GO:0008134 \\ GO:0016568 \\ GO:0016575 \\ GO:0014003 \\ GO:0006355 \\ GO:0006351 \\	chromatin modification (GO:0016568);histone deacetylation (GO:0016575);oligodendrocyte development (GO:0014003);regulation of transcription, DNA-templated (GO:0006355);transcription, DNA-templated (GO:0006351);	histone deacetylase activity (GO:0004407);NAD-dependent histone deacetylase activity (H3-K14 specific) (GO:0032041);transcription factor binding (GO:0008134);	extracellular exosome (GO:0070062);histone deacetylase complex (GO:0000118);nucleus (GO:0005634);plasma membrane (GO:0005886);	Alternative splicing;Chromatin regulator;Complete proteome;Hydrolase;Nucleus;Reference proteome;Repressor;Transcription;Transcription regulation.;		-0.300326	0.416155	0.781266	1	35	34	34.5	HDA11
Locus_10238_Transcript_2/3_Confidence_0.714_Length_5175	5175	Locus_10238_Transcript_2/3_Confidence_0.714_Length_5175	5175	Locus_10238_Transcript_2/3_Confidence_0.714_Length_5175	5175	Q9GKU5	80.967	0	HDA11_MACFA	Histone deacetylase 11	mcf:102133368	GO:0005737 \\ GO:0000118 \\ GO:0005634 \\ GO:0004407 \\ GO:0032041 \\ GO:0008134 \\ GO:0016568 \\ GO:0016575 \\ GO:0006355 \\ GO:0006351 \\	chromatin modification (GO:0016568);histone deacetylation (GO:0016575);regulation of transcription, DNA-templated (GO:0006355);transcription, DNA-templated (GO:0006351);	histone deacetylase activity (GO:0004407);NAD-dependent histone deacetylase activity (H3-K14 specific) (GO:0032041);transcription factor binding (GO:0008134);	cytoplasm (GO:0005737);histone deacetylase complex (GO:0000118);nucleus (GO:0005634);	Chromatin regulator;Hydrolase;Nucleus;Repressor;Transcription;Transcription regulation.;		-0.617018	0.698942	0.518508	1	38	46	42	HDA11
Locus_10239_Transcript_1/1_Confidence_1.000_Length_2717	2717	No_sig_nr_hit	No_sig_nr_hit	No_sig_nr_hit	No_sig_nr_hit	No_Uniprotmatch	No_%_identity	No_evalue	No_ID	No_Description	No_KEGG	No_GO	No_GOCC	No_GOBP	No_GOMF	No_keywords		1.36952	-0.265463	0.182111	1	33	10	21.5	No
Locus_1024_Transcript_1/4_Confidence_0.667_Length_1151	1151	Locus_1024_Transcript_1/4_Confidence_0.667_Length_1151	1151	Locus_1024_Transcript_1/4_Confidence_0.667_Length_1151	1151	Q566U4	58.131	3.17e-117	KFA_DANRE	Kynurenine formamidase {ECO:0000255|HAMAP-Rule:MF_03014}	dre:550372	GO:0005829 \\ GO:0005634 \\ GO:0004061 \\ GO:0034354 \\ GO:0019441 \\	'de novo' NAD biosynthetic process from tryptophan (GO:0034354);tryptophan catabolic process to kynurenine (GO:0019441);	arylformamidase activity (GO:0004061);	cytosol (GO:0005829);nucleus (GO:0005634);	Alternative splicing;Complete proteome;Cytoplasm;Hydrolase;Nucleus;Reference proteome;Tryptophan catabolism.;		-0.924184	5.3471	0.273254	1	865	1294	1079.5	KFA
Locus_1024_Transcript_2/4_Confidence_0.556_Length_701	701	Locus_1024_Transcript_2/4_Confidence_0.556_Length_701	701	Locus_1024_Transcript_2/4_Confidence_0.556_Length_701	701	Q8K4H1	48.182	2.15e-22	KFA_MOUSE	Kynurenine formamidase {ECO:0000255|HAMAP-Rule:MF_03014}	mmu:71562	GO:0005737 \\ GO:0005829 \\ GO:0005634 \\ GO:0004061 \\ GO:0034354 \\ GO:0019441 \\	'de novo' NAD biosynthetic process from tryptophan (GO:0034354);tryptophan catabolic process to kynurenine (GO:0019441);	arylformamidase activity (GO:0004061);	cytoplasm (GO:0005737);cytosol (GO:0005829);nucleus (GO:0005634);	Alternative splicing;Complete proteome;Cytoplasm;Direct protein sequencing;Hydrolase;Nucleus;Reference proteome;Tryptophan catabolism.;		-0.967578	4.33163	0.254122	1	419	646	532.5	KFA
Locus_1024_Transcript_3/4_Confidence_0.556_Length_1127	1127	Locus_1024_Transcript_3/4_Confidence_0.556_Length_1127	1127	Locus_1024_Transcript_3/4_Confidence_0.556_Length_1127	1127	Q566U4	59.786	1.73e-120	KFA_DANRE	Kynurenine formamidase {ECO:0000255|HAMAP-Rule:MF_03014}	dre:550372	GO:0005829 \\ GO:0005634 \\ GO:0004061 \\ GO:0034354 \\ GO:0019441 \\	'de novo' NAD biosynthetic process from tryptophan (GO:0034354);tryptophan catabolic process to kynurenine (GO:0019441);	arylformamidase activity (GO:0004061);	cytosol (GO:0005829);nucleus (GO:0005634);	Alternative splicing;Complete proteome;Cytoplasm;Hydrolase;Nucleus;Reference proteome;Tryptophan catabolism.;		-0.541016	5.51013	0.518953	1	1143	1311	1227	KFA
Locus_10240_Transcript_4/7_Confidence_0.400_Length_1733	1733	Locus_10240_Transcript_4/7_Confidence_0.400_Length_1733	1733	Locus_10240_Transcript_4/7_Confidence_0.400_Length_1733	1733	Q8TB37	81.818	4.35e-106	NUBPL_HUMAN	Iron-sulfur protein NUBPL	hsa:80224	GO:0005759 \\ GO:0005739 \\ GO:0051539 \\ GO:0005524 \\ GO:0046872 \\ GO:0044237 \\ GO:0032981 \\ GO:0070584 \\ GO:0022904 \\ GO:0044281 \\	cellular metabolic process (GO:0044237);mitochondrial respiratory chain complex I assembly (GO:0032981);mitochondrion morphogenesis (GO:0070584);respiratory electron transport chain (GO:0022904);small molecule metabolic process (GO:0044281);	4 iron, 4 sulfur cluster binding (GO:0051539);ATP binding (GO:0005524);metal ion binding (GO:0046872);	mitochondrial matrix (GO:0005759);mitochondrion (GO:0005739);	Alternative splicing;ATP-binding;Complete proteome;Disease mutation;Iron;Iron-sulfur;Metal-binding;Mitochondrion;Nucleotide-binding;Polymorphism;Reference proteome;Transit peptide.;		-0.690616	2.61331	0.423917	1	143	182	162.5	NUBPL
Locus_10240_Transcript_7/7_Confidence_0.400_Length_1773	1773	Locus_10240_Transcript_7/7_Confidence_0.400_Length_1773	1773	Locus_10240_Transcript_7/7_Confidence_0.400_Length_1773	1773	Q8TB37	81.522	1.73e-145	NUBPL_HUMAN	Iron-sulfur protein NUBPL	hsa:80224	GO:0005759 \\ GO:0005739 \\ GO:0051539 \\ GO:0005524 \\ GO:0046872 \\ GO:0044237 \\ GO:0032981 \\ GO:0070584 \\ GO:0022904 \\ GO:0044281 \\	cellular metabolic process (GO:0044237);mitochondrial respiratory chain complex I assembly (GO:0032981);mitochondrion morphogenesis (GO:0070584);respiratory electron transport chain (GO:0022904);small molecule metabolic process (GO:0044281);	4 iron, 4 sulfur cluster binding (GO:0051539);ATP binding (GO:0005524);metal ion binding (GO:0046872);	mitochondrial matrix (GO:0005759);mitochondrion (GO:0005739);	Alternative splicing;ATP-binding;Complete proteome;Disease mutation;Iron;Iron-sulfur;Metal-binding;Mitochondrion;Nucleotide-binding;Polymorphism;Reference proteome;Transit peptide.;		-0.472935	2.63681	0.583186	1	159	174	166.5	NUBPL
Locus_10241_Transcript_3/3_Confidence_0.714_Length_2300	2300	Locus_10241_Transcript_3/3_Confidence_0.714_Length_2300	2300	Locus_10241_Transcript_3/3_Confidence_0.714_Length_2300	2300	Q99967	69.925	1.85e-88	CITE2_HUMAN	Cbp/p300-interacting transactivator 2	hsa:10370	GO:0005737 \\ GO:0000790 \\ GO:0005634 \\ GO:0003682 \\ GO:0035035 \\ GO:0050693 \\ GO:0001105 \\ GO:0001106 \\ GO:0003713 \\ GO:0003714 \\ GO:0003700 \\ GO:0035802 \\ GO:0030154 \\ GO:0008283 \\ GO:0007368 \\ GO:0060971 \\ GO:0007507 \\ GO:0070986 \\ GO:0060972 \\ GO:0001889 \\ GO:0043066 \\ GO:0030336 \\ GO:0010629 \\ GO:0000122 \\ GO:0061428 \\ GO:0045892 \\ GO:1900164 \\ GO:0003151 \\ GO:0045…	adrenal cortex formation (GO:0035802);cell differentiation (GO:0030154);cell proliferation (GO:0008283);determination of left/right symmetry (GO:0007368);embryonic heart tube left/right pattern formation (GO:0060971);heart development (GO:0007507);left/right axis specification (GO:0070986);left/right pattern formation (GO:0060972);liver development (GO:0001889);negative regulation of apoptotic pr…	chromatin binding (GO:0003682);histone acetyltransferase binding (GO:0035035);LBD domain binding (GO:0050693);RNA polymerase II transcription coactivator activity (GO:0001105);RNA polymerase II transcription corepressor activity (GO:0001106);transcription coactivator activity (GO:0003713);transcription corepressor activity (GO:0003714);transcription factor activity, sequence-specific DNA binding …	cytoplasm (GO:0005737);nuclear chromatin (GO:0000790);nucleus (GO:0005634);	3D-structure;Activator;Alternative splicing;Atrial septal defect;Complete proteome;Developmental protein;Differentiation;Disease mutation;Nucleus;Reference proteome;Repressor;Stress response;Transcription;Transcription regulation.;		-1.49119	3.44049	0.0834356	1	175	388	281.5	CITE2
Locus_10242_Transcript_3/6_Confidence_0.133_Length_1362	1362	Locus_10242_Transcript_3/6_Confidence_0.133_Length_1362	1362	Locus_10242_Transcript_3/6_Confidence_0.133_Length_1362	1362	Q5NVD0	94.964	2.28e-89	PRP4_PONAB	U4/U6 small nuclear ribonucleoprotein Prp4	pon:100174168	GO:0016607 \\ GO:0005681 \\ GO:0097525 \\ GO:0071001 \\ GO:0006397 \\ GO:0008380 \\	mRNA processing (GO:0006397);RNA splicing (GO:0008380);	No_GOMF	nuclear speck (GO:0016607);spliceosomal complex (GO:0005681);spliceosomal snRNP complex (GO:0097525);U4/U6 snRNP (GO:0071001);	Acetylation;Complete proteome;mRNA processing;mRNA splicing;Nucleus;Reference proteome;Repeat;Spliceosome;WD repeat.;		0.208599	0.493148	0.860654	1	44	30	37	PRP4
Locus_10242_Transcript_5/6_Confidence_0.600_Length_3265	3265	Locus_10242_Transcript_5/6_Confidence_0.600_Length_3265	3265	Locus_10242_Transcript_5/6_Confidence_0.600_Length_3265	3265	O43172	92.835	0	PRP4_HUMAN	U4/U6 small nuclear ribonucleoprotein Prp4	hsa:9128	GO:0015030 \\ GO:0016607 \\ GO:0005654 \\ GO:0005634 \\ GO:0005681 \\ GO:0097525 \\ GO:0071001 \\ GO:0046540 \\ GO:0030621 \\ GO:0017070 \\ GO:0010467 \\ GO:0000398 \\ GO:0006396 \\ GO:0008380 \\ GO:0000375 \\	gene expression (GO:0010467);mRNA splicing, via spliceosome (GO:0000398);RNA processing (GO:0006396);RNA splicing (GO:0008380);RNA splicing, via transesterification reactions (GO:0000375);	U4 snRNA binding (GO:0030621);U6 snRNA binding (GO:0017070);	Cajal body (GO:0015030);nuclear speck (GO:0016607);nucleoplasm (GO:0005654);nucleus (GO:0005634);spliceosomal complex (GO:0005681);spliceosomal snRNP complex (GO:0097525);U4/U6 snRNP (GO:0071001);U4/U6 x U5 tri-snRNP complex (GO:0046540);	3D-structure;Acetylation;Alternative splicing;Complete proteome;Direct protein sequencing;Disease mutation;mRNA processing;mRNA splicing;Nucleus;Reference proteome;Repeat;Retinitis pigmentosa;Spliceosome;WD repeat.;		0.210248	1.11336	0.839786	1	69	47	58	PRP4
Locus_10242_Transcript_6/6_Confidence_0.467_Length_2471	2471	Locus_10242_Transcript_6/6_Confidence_0.467_Length_2471	2471	Locus_10242_Transcript_6/6_Confidence_0.467_Length_2471	2471	O43172	91.481	0	PRP4_HUMAN	U4/U6 small nuclear ribonucleoprotein Prp4	hsa:9128	GO:0015030 \\ GO:0016607 \\ GO:0005654 \\ GO:0005634 \\ GO:0005681 \\ GO:0097525 \\ GO:0071001 \\ GO:0046540 \\ GO:0030621 \\ GO:0017070 \\ GO:0010467 \\ GO:0000398 \\ GO:0006396 \\ GO:0008380 \\ GO:0000375 \\	gene expression (GO:0010467);mRNA splicing, via spliceosome (GO:0000398);RNA processing (GO:0006396);RNA splicing (GO:0008380);RNA splicing, via transesterification reactions (GO:0000375);	U4 snRNA binding (GO:0030621);U6 snRNA binding (GO:0017070);	Cajal body (GO:0015030);nuclear speck (GO:0016607);nucleoplasm (GO:0005654);nucleus (GO:0005634);spliceosomal complex (GO:0005681);spliceosomal snRNP complex (GO:0097525);U4/U6 snRNP (GO:0071001);U4/U6 x U5 tri-snRNP complex (GO:0046540);	3D-structure;Acetylation;Alternative splicing;Complete proteome;Direct protein sequencing;Disease mutation;mRNA processing;mRNA splicing;Nucleus;Reference proteome;Repeat;Retinitis pigmentosa;Spliceosome;WD repeat.;		-0.0476519	0.889778	0.973436	1	54	44	49	PRP4
Locus_10243_Transcript_3/7_Confidence_0.611_Length_4696	4696	Locus_10243_Transcript_3/7_Confidence_0.611_Length_4696	4696	Locus_10243_Transcript_3/7_Confidence_0.611_Length_4696	4696	Q9H6Q4	73.729	0	NARFL_HUMAN	Cytosolic Fe-S cluster assembly factor NARFL	hsa:64428	GO:0097361 \\ GO:0051539 \\ GO:0051536 \\ GO:0046872 \\ GO:0002244 \\ GO:0016226 \\ GO:0032364 \\ GO:0006355 \\ GO:0001666 \\ GO:0044281 \\	hematopoietic progenitor cell differentiation (GO:0002244);iron-sulfur cluster assembly (GO:0016226);oxygen homeostasis (GO:0032364);regulation of transcription, DNA-templated (GO:0006355);response to hypoxia (GO:0001666);small molecule metabolic process (GO:0044281);	4 iron, 4 sulfur cluster binding (GO:0051539);iron-sulfur cluster binding (GO:0051536);metal ion binding (GO:0046872);	CIA complex (GO:0097361);	4Fe-4S;Acetylation;Alternative splicing;Complete proteome;Iron;Iron-sulfur;Metal-binding;Polymorphism;Reference proteome.;		0.524282	3.16485	0.536934	1	323	177	250	NARFL
Locus_10243_Transcript_6/7_Confidence_0.611_Length_5081	5081	Locus_10243_Transcript_6/7_Confidence_0.611_Length_5081	5081	Locus_10243_Transcript_6/7_Confidence_0.611_Length_5081	5081	A4FV58	72.764	6.35e-117	NARFL_BOVIN	Cytosolic Fe-S cluster assembly factor NARFL	bta:511837	GO:0097361 \\ GO:0005829 \\ GO:0051539 \\ GO:0051536 \\ GO:0046872 \\ GO:0002244 \\ GO:0016226 \\ GO:0032364 \\ GO:0006355 \\ GO:0001666 \\	hematopoietic progenitor cell differentiation (GO:0002244);iron-sulfur cluster assembly (GO:0016226);oxygen homeostasis (GO:0032364);regulation of transcription, DNA-templated (GO:0006355);response to hypoxia (GO:0001666);	4 iron, 4 sulfur cluster binding (GO:0051539);iron-sulfur cluster binding (GO:0051536);metal ion binding (GO:0046872);	CIA complex (GO:0097361);cytosol (GO:0005829);	4Fe-4S;Acetylation;Alternative splicing;Complete proteome;Iron;Iron-sulfur;Metal-binding;Reference proteome.;		0.600935	3.0573	0.481047	1	306	159	232.5	NARFL
Locus_10244_Transcript_1/3_Confidence_0.667_Length_1171	1171	Locus_10244_Transcript_1/3_Confidence_0.667_Length_1171	1171	Locus_10244_Transcript_1/3_Confidence_0.667_Length_1171	1171	O14519	83.962	9.28e-53	CDKA1_HUMAN	Cyclin-dependent kinase 2-associated protein 1	hsa:8099	GO:0005634 \\ GO:0048471 \\ GO:0070182 \\ GO:0007049 \\ GO:0006261 \\ GO:0001934 \\	cell cycle (GO:0007049);DNA-dependent DNA replication (GO:0006261);positive regulation of protein phosphorylation (GO:0001934);	DNA polymerase binding (GO:0070182);	nucleus (GO:0005634);perinuclear region of cytoplasm (GO:0048471);	3D-structure;Alternative splicing;Cell cycle;Complete proteome;Disulfide bond;Phosphoprotein;Reference proteome;Tumor suppressor.;		1.25923	0.709599	0.179045	1	67	22	44.5	CDKA1
Locus_10244_Transcript_2/3_Confidence_0.667_Length_1332	1332	Locus_10244_Transcript_2/3_Confidence_0.667_Length_1332	1332	Locus_10244_Transcript_2/3_Confidence_0.667_Length_1332	1332	O14519	87.611	1.74e-60	CDKA1_HUMAN	Cyclin-dependent kinase 2-associated protein 1	hsa:8099	GO:0005634 \\ GO:0048471 \\ GO:0070182 \\ GO:0007049 \\ GO:0006261 \\ GO:0001934 \\	cell cycle (GO:0007049);DNA-dependent DNA replication (GO:0006261);positive regulation of protein phosphorylation (GO:0001934);	DNA polymerase binding (GO:0070182);	nucleus (GO:0005634);perinuclear region of cytoplasm (GO:0048471);	3D-structure;Alternative splicing;Cell cycle;Complete proteome;Disulfide bond;Phosphoprotein;Reference proteome;Tumor suppressor.;		0.392684	0.843657	0.702368	1	60	36	48	CDKA1
Locus_102442_Transcript_1/1_Confidence_1.000_Length_868	868	No_sig_nr_hit	No_sig_nr_hit	No_sig_nr_hit	No_sig_nr_hit	No_Uniprotmatch	No_%_identity	No_evalue	No_ID	No_Description	No_KEGG	No_GO	No_GOCC	No_GOBP	No_GOMF	No_keywords		0.157898	-0.743888	1	1	17	12	14.5	No
Locus_10245_Transcript_10/10_Confidence_0.486_Length_4015	4015	Locus_10245_Transcript_10/10_Confidence_0.486_Length_4015	4015	Locus_10245_Transcript_10/10_Confidence_0.486_Length_4015	4015	Q9NVF7	91.582	1.48e-165	FBX28_HUMAN	F-box only protein 28	hsa:23219	No_GOcodes	No_GOBP	No_GOMF	No_GOCC	Alternative splicing;Complete proteome;Phosphoprotein;Polymorphism;Reference proteome;Ubl conjugation pathway.;		0.441202	0.574086	0.675267	1	50	29	39.5	FBX28
Locus_10245_Transcript_2/10_Confidence_0.514_Length_4123	4123	Locus_10245_Transcript_2/10_Confidence_0.514_Length_4123	4123	Locus_10245_Transcript_2/10_Confidence_0.514_Length_4123	4123	Q9NVF7	81.381	2.42e-158	FBX28_HUMAN	F-box only protein 28	hsa:23219	No_GOcodes	No_GOBP	No_GOMF	No_GOCC	Alternative splicing;Complete proteome;Phosphoprotein;Polymorphism;Reference proteome;Ubl conjugation pathway.;		0.654253	0.382558	0.502246	1	46	23	34.5	FBX28
Locus_10245_Transcript_4/10_Confidence_0.600_Length_4625	4625	Locus_10245_Transcript_4/10_Confidence_0.600_Length_4625	4625	Locus_10245_Transcript_4/10_Confidence_0.600_Length_4625	4625	Q2NL16	94.382	1.87e-110	FBX28_BOVIN	F-box only protein 28	bta:537745	No_GOcodes	No_GOBP	No_GOMF	No_GOCC	Complete proteome;Phosphoprotein;Reference proteome;Ubl conjugation pathway.;		0.864508	0.253179	0.363524	1	44	19	31.5	FBX28
Locus_10245_Transcript_6/10_Confidence_0.486_Length_4419	4419	Locus_10245_Transcript_6/10_Confidence_0.486_Length_4419	4419	Locus_10245_Transcript_6/10_Confidence_0.486_Length_4419	4419	Q9NVF7	91.739	7.35e-117	FBX28_HUMAN	F-box only protein 28	hsa:23219	No_GOcodes	No_GOBP	No_GOMF	No_GOCC	Alternative splicing;Complete proteome;Phosphoprotein;Polymorphism;Reference proteome;Ubl conjugation pathway.;		0.125746	0.255475	0.917562	1	36	26	31	FBX28
Locus_10245_Transcript_8/10_Confidence_0.429_Length_3041	3041	Locus_10245_Transcript_8/10_Confidence_0.429_Length_3041	3041	Locus_10245_Transcript_8/10_Confidence_0.429_Length_3041	3041	Q9NVF7	91.775	2.7e-120	FBX28_HUMAN	F-box only protein 28	hsa:23219	No_GOcodes	No_GOBP	No_GOMF	No_GOCC	Alternative splicing;Complete proteome;Phosphoprotein;Polymorphism;Reference proteome;Ubl conjugation pathway.;		1.47209	0.149035	0.143627	1	46	13	29.5	FBX28
Locus_10245_Transcript_9/10_Confidence_0.486_Length_4803	4803	Locus_10245_Transcript_9/10_Confidence_0.486_Length_4803	4803	Locus_10245_Transcript_9/10_Confidence_0.486_Length_4803	4803	Q9NVF7	92.884	1.81e-145	FBX28_HUMAN	F-box only protein 28	hsa:23219	No_GOcodes	No_GOBP	No_GOMF	No_GOCC	Alternative splicing;Complete proteome;Phosphoprotein;Polymorphism;Reference proteome;Ubl conjugation pathway.;		0.757863	0.256414	0.463781	1	43	20	31.5	FBX28
Locus_10246_Transcript_1/2_Confidence_0.833_Length_2303	2303	No_sig_nr_hit	No_sig_nr_hit	No_sig_nr_hit	No_sig_nr_hit	No_Uniprotmatch	No_%_identity	No_evalue	No_ID	No_Description	No_KEGG	No_GO	No_GOCC	No_GOBP	No_GOMF	No_keywords		0.270164	4.41445	0.748361	1	716	468	592	No
Locus_10248_Transcript_1/3_Confidence_0.750_Length_3058	3058	Locus_10248_Transcript_1/3_Confidence_0.750_Length_3058	3058	Locus_10248_Transcript_1/3_Confidence_0.750_Length_3058	3058	Q6GL41	89.56	0	MCM4_XENTR	DNA replication licensing factor mcm4	xtr:448137	GO:0000785 \\ GO:0042555 \\ GO:0005634 \\ GO:0005524 \\ GO:0003677 \\ GO:0003678 \\ GO:0046872 \\ GO:0007049 \\ GO:0006270 \\ GO:0006268 \\ GO:0030174 \\	cell cycle (GO:0007049);DNA replication initiation (GO:0006270);DNA unwinding involved in DNA replication (GO:0006268);regulation of DNA-dependent DNA replication initiation (GO:0030174);	ATP binding (GO:0005524);DNA binding (GO:0003677);DNA helicase activity (GO:0003678);metal ion binding (GO:0046872);	chromatin (GO:0000785);MCM complex (GO:0042555);nucleus (GO:0005634);	ATP-binding;Cell cycle;Complete proteome;DNA replication;DNA-binding;Helicase;Hydrolase;Metal-binding;Nucleotide-binding;Nucleus;Phosphoprotein;Reference proteome;Zinc;Zinc-finger.;		1.36518	2.67013	0.117399	1	278	85	181.5	MCM4
Locus_10248_Transcript_2/3_Confidence_0.750_Length_2973	2973	Locus_10248_Transcript_2/3_Confidence_0.750_Length_2973	2973	Locus_10248_Transcript_2/3_Confidence_0.750_Length_2973	2973	Q6GL41	86.889	0	MCM4_XENTR	DNA replication licensing factor mcm4	xtr:448137	GO:0000785 \\ GO:0042555 \\ GO:0005634 \\ GO:0005524 \\ GO:0003677 \\ GO:0003678 \\ GO:0046872 \\ GO:0007049 \\ GO:0006270 \\ GO:0006268 \\ GO:0030174 \\	cell cycle (GO:0007049);DNA replication initiation (GO:0006270);DNA unwinding involved in DNA replication (GO:0006268);regulation of DNA-dependent DNA replication initiation (GO:0030174);	ATP binding (GO:0005524);DNA binding (GO:0003677);DNA helicase activity (GO:0003678);metal ion binding (GO:0046872);	chromatin (GO:0000785);MCM complex (GO:0042555);nucleus (GO:0005634);	ATP-binding;Cell cycle;Complete proteome;DNA replication;DNA-binding;Helicase;Hydrolase;Metal-binding;Nucleotide-binding;Nucleus;Phosphoprotein;Reference proteome;Zinc;Zinc-finger.;		2.02554	2.62726	0.0233934	1	300	58	179	MCM4
Locus_102487_Transcript_1/1_Confidence_1.000_Length_246	246	Locus_102487_Transcript_1/1_Confidence_1.000_Length_246	246	Locus_102487_Transcript_1/1_Confidence_1.000_Length_246	246	P04210	74.699	3.91e-36	LV1_CHICK	Ig lambda chain V-1 region	No_KEGG	GO:0005576 \\ GO:0003823 \\ GO:0006956 \\ GO:0045087 \\	complement activation (GO:0006956);innate immune response (GO:0045087);	antigen binding (GO:0003823);	extracellular region (GO:0005576);	Complete proteome;Disulfide bond;Immunoglobulin domain;Immunoglobulin V region;Reference proteome;Signal.;		-1.57566	1.65152	0.0762513	1	48	113	80.5	LV1
Locus_10249_Transcript_1/4_Confidence_0.444_Length_4122	4122	Locus_10249_Transcript_1/4_Confidence_0.444_Length_4122	4122	Locus_10249_Transcript_1/4_Confidence_0.444_Length_4122	4122	Q9BVG8	80.69	0	KIFC3_HUMAN	Kinesin-like protein KIFC3	hsa:3801	GO:0005813 \\ GO:0030659 \\ GO:0070062 \\ GO:0005794 \\ GO:0005871 \\ GO:0005874 \\ GO:0005915 \\ GO:0005524 \\ GO:0016887 \\ GO:0003777 \\ GO:0090136 \\ GO:0007030 \\ GO:0007018 \\ GO:0007601 \\ GO:0045218 \\	epithelial cell-cell adhesion (GO:0090136);Golgi organization (GO:0007030);microtubule-based movement (GO:0007018);visual perception (GO:0007601);zonula adherens maintenance (GO:0045218);	ATP binding (GO:0005524);ATPase activity (GO:0016887);microtubule motor activity (GO:0003777);	centrosome (GO:0005813);cytoplasmic vesicle membrane (GO:0030659);extracellular exosome (GO:0070062);Golgi apparatus (GO:0005794);kinesin complex (GO:0005871);microtubule (GO:0005874);zonula adherens (GO:0005915);	3D-structure;Alternative splicing;ATP-binding;Cell junction;Coiled coil;Complete proteome;Cytoplasm;Cytoplasmic vesicle;Cytoskeleton;Membrane;Microtubule;Motor protein;Nucleotide-binding;Polymorphism;Reference proteome.;		-0.053627	1.38775	0.961906	1	77	63	70	KIFC3
Locus_10249_Transcript_2/4_Confidence_0.333_Length_1140	1140	No_sig_nr_hit	No_sig_nr_hit	No_sig_nr_hit	No_sig_nr_hit	No_Uniprotmatch	No_%_identity	No_evalue	No_ID	No_Description	No_KEGG	No_GO	No_GOCC	No_GOBP	No_GOMF	No_keywords		0.922449	0.140606	0.354263	1	41	17	29	No
Locus_10249_Transcript_4/4_Confidence_0.667_Length_4093	4093	Locus_10249_Transcript_4/4_Confidence_0.667_Length_4093	4093	Locus_10249_Transcript_4/4_Confidence_0.667_Length_4093	4093	Q9BVG8	80.601	0	KIFC3_HUMAN	Kinesin-like protein KIFC3	hsa:3801	GO:0005813 \\ GO:0030659 \\ GO:0070062 \\ GO:0005794 \\ GO:0005871 \\ GO:0005874 \\ GO:0005915 \\ GO:0005524 \\ GO:0016887 \\ GO:0003777 \\ GO:0090136 \\ GO:0007030 \\ GO:0007018 \\ GO:0007601 \\ GO:0045218 \\	epithelial cell-cell adhesion (GO:0090136);Golgi organization (GO:0007030);microtubule-based movement (GO:0007018);visual perception (GO:0007601);zonula adherens maintenance (GO:0045218);	ATP binding (GO:0005524);ATPase activity (GO:0016887);microtubule motor activity (GO:0003777);	centrosome (GO:0005813);cytoplasmic vesicle membrane (GO:0030659);extracellular exosome (GO:0070062);Golgi apparatus (GO:0005794);kinesin complex (GO:0005871);microtubule (GO:0005874);zonula adherens (GO:0005915);	3D-structure;Alternative splicing;ATP-binding;Cell junction;Coiled coil;Complete proteome;Cytoplasm;Cytoplasmic vesicle;Cytoskeleton;Membrane;Microtubule;Motor protein;Nucleotide-binding;Polymorphism;Reference proteome.;		-0.219105	1.39524	0.830817	1	73	67	70	KIFC3
Locus_1025_Transcript_1/1_Confidence_1.000_Length_2119	2119	Locus_1025_Transcript_1/1_Confidence_1.000_Length_2119	2119	Locus_1025_Transcript_1/1_Confidence_1.000_Length_2119	2119	Q6RI85	82.443	0	PGK2_PIG	Phosphoglycerate kinase 2	ssc:396673	GO:0005737 \\ GO:0005524 \\ GO:0004618 \\ GO:0006096 \\ GO:0016310 \\	glycolytic process (GO:0006096);phosphorylation (GO:0016310);	ATP binding (GO:0005524);phosphoglycerate kinase activity (GO:0004618);	cytoplasm (GO:0005737);	ATP-binding;Complete proteome;Cytoplasm;Glycolysis;Kinase;Nucleotide-binding;Polymorphism;Reference proteome;Transferase.;		0.177149	8.60854	0.831735	1	12767	8901	10834	PGK2
Locus_10251_Transcript_1/3_Confidence_0.154_Length_603	603	No_sig_nr_hit	No_sig_nr_hit	No_sig_nr_hit	No_sig_nr_hit	No_Uniprotmatch	No_%_identity	No_evalue	No_ID	No_Description	No_KEGG	No_GO	No_GOCC	No_GOBP	No_GOMF	No_keywords		1.80317	2.12713	0.0439501	1	204	46	125	No
Locus_10251_Transcript_3/3_Confidence_0.846_Length_1142	1142	No_sig_nr_hit	No_sig_nr_hit	No_sig_nr_hit	No_sig_nr_hit	No_Uniprotmatch	No_%_identity	No_evalue	No_ID	No_Description	No_KEGG	No_GO	No_GOCC	No_GOBP	No_GOMF	No_keywords		1.81461	1.79231	0.0458613	1	161	36	98.5	No
Locus_10252_Transcript_1/3_Confidence_0.667_Length_2590	2590	Locus_10252_Transcript_1/3_Confidence_0.667_Length_2590	2590	Locus_10252_Transcript_1/3_Confidence_0.667_Length_2590	2590	O95198	89.127	0	KLHL2_HUMAN	Kelch-like protein 2	hsa:11275	GO:0015629 \\ GO:0031463 \\ GO:0005737 \\ GO:0005829 \\ GO:0030027 \\ GO:0001726 \\ GO:0003779 \\ GO:0016567 \\	protein ubiquitination (GO:0016567);	actin binding (GO:0003779);	actin cytoskeleton (GO:0015629);Cul3-RING ubiquitin ligase complex (GO:0031463);cytoplasm (GO:0005737);cytosol (GO:0005829);lamellipodium (GO:0030027);ruffle (GO:0001726);	3D-structure;Actin-binding;Alternative splicing;Cell projection;Complete proteome;Cytoplasm;Cytoskeleton;Kelch repeat;Reference proteome;Repeat;Ubl conjugation pathway.;		0.18448	1.94791	0.845197	1	124	86	105	KLHL2
Locus_10252_Transcript_2/3_Confidence_0.333_Length_1939	1939	Locus_10252_Transcript_2/3_Confidence_0.333_Length_1939	1939	Locus_10252_Transcript_2/3_Confidence_0.333_Length_1939	1939	O95198	92.381	3.1e-57	KLHL2_HUMAN	Kelch-like protein 2	hsa:11275	GO:0015629 \\ GO:0031463 \\ GO:0005737 \\ GO:0005829 \\ GO:0030027 \\ GO:0001726 \\ GO:0003779 \\ GO:0016567 \\	protein ubiquitination (GO:0016567);	actin binding (GO:0003779);	actin cytoskeleton (GO:0015629);Cul3-RING ubiquitin ligase complex (GO:0031463);cytoplasm (GO:0005737);cytosol (GO:0005829);lamellipodium (GO:0030027);ruffle (GO:0001726);	3D-structure;Actin-binding;Alternative splicing;Cell projection;Complete proteome;Cytoplasm;Cytoskeleton;Kelch repeat;Reference proteome;Repeat;Ubl conjugation pathway.;		0.85004	0.910155	0.360211	1	71	31	51	KLHL2
Locus_10252_Transcript_3/3_Confidence_0.667_Length_2533	2533	Locus_10252_Transcript_3/3_Confidence_0.667_Length_2533	2533	Locus_10252_Transcript_3/3_Confidence_0.667_Length_2533	2533	O95198	92.007	0	KLHL2_HUMAN	Kelch-like protein 2	hsa:11275	GO:0015629 \\ GO:0031463 \\ GO:0005737 \\ GO:0005829 \\ GO:0030027 \\ GO:0001726 \\ GO:0003779 \\ GO:0016567 \\	protein ubiquitination (GO:0016567);	actin binding (GO:0003779);	actin cytoskeleton (GO:0015629);Cul3-RING ubiquitin ligase complex (GO:0031463);cytoplasm (GO:0005737);cytosol (GO:0005829);lamellipodium (GO:0030027);ruffle (GO:0001726);	3D-structure;Actin-binding;Alternative splicing;Cell projection;Complete proteome;Cytoplasm;Cytoskeleton;Kelch repeat;Reference proteome;Repeat;Ubl conjugation pathway.;		0.149188	1.92927	0.881965	1	121	86	103.5	KLHL2
Locus_10255_Transcript_2/5_Confidence_0.583_Length_7804	7804	Locus_10255_Transcript_2/5_Confidence_0.583_Length_7804	7804	Locus_10255_Transcript_2/5_Confidence_0.583_Length_7804	7804	Q6UB98	63.131	0	ANR12_HUMAN	Ankyrin repeat domain-containing protein 12	hsa:23253	GO:0005737 \\ GO:0005654 \\	No_GOBP	No_GOMF	cytoplasm (GO:0005737);nucleoplasm (GO:0005654);	Alternative splicing;ANK repeat;Complete proteome;Nucleus;Phosphoprotein;Polymorphism;Reference proteome;Repeat.;		1.17544	5.22976	0.165721	1	1599	558	1078.5	ANR12
Locus_10255_Transcript_4/5_Confidence_0.667_Length_7625	7625	Locus_10255_Transcript_4/5_Confidence_0.667_Length_7625	7625	Locus_10255_Transcript_4/5_Confidence_0.667_Length_7625	7625	Q6UB98	65.723	0	ANR12_HUMAN	Ankyrin repeat domain-containing protein 12	hsa:23253	GO:0005737 \\ GO:0005654 \\	No_GOBP	No_GOMF	cytoplasm (GO:0005737);nucleoplasm (GO:0005654);	Alternative splicing;ANK repeat;Complete proteome;Nucleus;Phosphoprotein;Polymorphism;Reference proteome;Repeat.;		1.25067	5.19729	0.141075	1	1588	526	1057	ANR12
Locus_10256_Transcript_1/1_Confidence_1.000_Length_235	235	Locus_10256_Transcript_1/1_Confidence_1.000_Length_235	235	Locus_10256_Transcript_1/1_Confidence_1.000_Length_235	235	P11342	87.179	1.2e-18	HBB_COLLI	Hemoglobin subunit beta	No_KEGG	GO:0005833 \\ GO:0020037 \\ GO:0005506 \\ GO:0019825 \\ GO:0005344 \\	No_GOBP	heme binding (GO:0020037);iron ion binding (GO:0005506);oxygen binding (GO:0019825);oxygen transporter activity (GO:0005344);	hemoglobin complex (GO:0005833);	3D-structure;Direct protein sequencing;Heme;Iron;Metal-binding;Oxygen transport;Transport.;		-0.143254	4.12741	0.867929	1	510	444	477	HBB
Locus_10257_Transcript_6/9_Confidence_0.690_Length_2810	2810	No_sig_nr_hit	No_sig_nr_hit	No_sig_nr_hit	No_sig_nr_hit	No_Uniprotmatch	No_%_identity	No_evalue	No_ID	No_Description	No_KEGG	No_GO	No_GOCC	No_GOBP	No_GOMF	No_keywords		-0.0282791	0.8015	1	1	51	41	46	No
Locus_10257_Transcript_9/9_Confidence_0.690_Length_2762	2762	No_sig_nr_hit	No_sig_nr_hit	No_sig_nr_hit	No_sig_nr_hit	No_Uniprotmatch	No_%_identity	No_evalue	No_ID	No_Description	No_KEGG	No_GO	No_GOCC	No_GOBP	No_GOMF	No_keywords		0.883744	0.83978	0.354434	1	68	29	48.5	No
Locus_10258_Transcript_1/2_Confidence_0.750_Length_1380	1380	No_sig_nr_hit	No_sig_nr_hit	No_sig_nr_hit	No_sig_nr_hit	No_Uniprotmatch	No_%_identity	No_evalue	No_ID	No_Description	No_KEGG	No_GO	No_GOCC	No_GOBP	No_GOMF	No_keywords		0.583864	0.218417	0.560587	1	40	21	30.5	No
Locus_102588_Transcript_1/1_Confidence_1.000_Length_219	219	No_sig_nr_hit	No_sig_nr_hit	No_sig_nr_hit	No_sig_nr_hit	No_Uniprotmatch	No_%_identity	No_evalue	No_ID	No_Description	No_KEGG	No_GO	No_GOCC	No_GOBP	No_GOMF	No_keywords		1.45407	-0.207976	0.15076	1	35	10	22.5	No
Locus_1026_Transcript_1/10_Confidence_0.222_Length_3935	3935	Locus_1026_Transcript_1/10_Confidence_0.222_Length_3935	3935	Locus_1026_Transcript_1/10_Confidence_0.222_Length_3935	3935	Q9Y239	70.732	8.62e-123	NOD1_HUMAN	Nucleotide-binding oligomerization domain-containing protein 1	hsa:10392	GO:0016324 \\ GO:0016323 \\ GO:0005737 \\ GO:0005829 \\ GO:0005524 \\ GO:0050700 \\ GO:0008656 \\ GO:0042802 \\ GO:0042834 \\ GO:0042803 \\ GO:0006919 \\ GO:0000187 \\ GO:0006915 \\ GO:0071225 \\ GO:0006952 \\ GO:0042742 \\ GO:0050830 \\ GO:0016045 \\ GO:0009595 \\ GO:0006954 \\ GO:0045087 \\ GO:0042228 \\ GO:0035556 \\ GO:0007254 \\ GO:0002755 \\ GO:0002756 \\ GO:0035872 \\ GO:0070423 \\ GO:0043…	activation of cysteine-type endopeptidase activity involved in apoptotic process (GO:0006919);activation of MAPK activity (GO:0000187);apoptotic process (GO:0006915);cellular response to muramyl dipeptide (GO:0071225);defense response (GO:0006952);defense response to bacterium (GO:0042742);defense response to Gram-positive bacterium (GO:0050830);detection of bacterium (GO:0016045);detection of bi…	ATP binding (GO:0005524);CARD domain binding (GO:0050700);cysteine-type endopeptidase activator activity involved in apoptotic process (GO:0008656);identical protein binding (GO:0042802);peptidoglycan binding (GO:0042834);protein homodimerization activity (GO:0042803);	apical plasma membrane (GO:0016324);basolateral plasma membrane (GO:0016323);cytoplasm (GO:0005737);cytosol (GO:0005829);	3D-structure;Alternative splicing;Apoptosis;ATP-binding;Cell membrane;Complete proteome;Cytoplasm;Immunity;Innate immunity;Leucine-rich repeat;Membrane;Nucleotide-binding;Polymorphism;Reference proteome;Repeat;Ubl conjugation.;		0.903928	2.52842	0.293305	1	228	96	162	NOD1
Locus_1026_Transcript_10/10_Confidence_0.156_Length_3440	3440	Locus_1026_Transcript_10/10_Confidence_0.156_Length_3440	3440	Locus_1026_Transcript_10/10_Confidence_0.156_Length_3440	3440	Q8NHG8	85.517	5.48e-67	ZNRF2_HUMAN	E3 ubiquitin-protein ligase ZNRF2	hsa:223082	GO:0030054 \\ GO:0005737 \\ GO:0030659 \\ GO:0010008 \\ GO:0005765 \\ GO:0005886 \\ GO:0042734 \\ GO:0043234 \\ GO:0016874 \\ GO:0061630 \\ GO:0008270 \\	No_GOBP	ligase activity (GO:0016874);ubiquitin protein ligase activity (GO:0061630);zinc ion binding (GO:0008270);	cell junction (GO:0030054);cytoplasm (GO:0005737);cytoplasmic vesicle membrane (GO:0030659);endosome membrane (GO:0010008);lysosomal membrane (GO:0005765);plasma membrane (GO:0005886);presynaptic membrane (GO:0042734);protein complex (GO:0043234);	Cell junction;Cell membrane;Complete proteome;Endosome;Ligase;Lipoprotein;Lysosome;Membrane;Metal-binding;Myristate;Phosphoprotein;Reference proteome;Synapse;Ubl conjugation pathway;Zinc;Zinc-finger.;		0.414666	4.25156	0.623905	1	668	395	531.5	ZNRF2
Locus_1026_Transcript_2/10_Confidence_0.156_Length_1909	1909	Locus_1026_Transcript_2/10_Confidence_0.156_Length_1909	1909	Locus_1026_Transcript_2/10_Confidence_0.156_Length_1909	1909	Q8BHB0	65.789	6.84e-55	NOD1_MOUSE	Nucleotide-binding oligomerization domain-containing protein 1	mmu:107607	GO:0016324 \\ GO:0016323 \\ GO:0005737 \\ GO:0005524 \\ GO:0050700 \\ GO:0042802 \\ GO:0042803 \\ GO:0006919 \\ GO:0071225 \\ GO:0042742 \\ GO:0050830 \\ GO:0016045 \\ GO:0045087 \\ GO:0042228 \\ GO:0035556 \\ GO:0043280 \\ GO:0002606 \\ GO:0070374 \\ GO:0043123 \\ GO:0032731 \\ GO:0032755 \\ GO:0046330 \\ GO:0051092 \\ GO:1901224 \\ GO:0051000 \\ GO:0032874 \\ GO:0032760 \\ GO:1904417 \\	activation of cysteine-type endopeptidase activity involved in apoptotic process (GO:0006919);cellular response to muramyl dipeptide (GO:0071225);defense response to bacterium (GO:0042742);defense response to Gram-positive bacterium (GO:0050830);detection of bacterium (GO:0016045);innate immune response (GO:0045087);interleukin-8 biosynthetic process (GO:0042228);intracellular signal transduction…	ATP binding (GO:0005524);CARD domain binding (GO:0050700);identical protein binding (GO:0042802);protein homodimerization activity (GO:0042803);	apical plasma membrane (GO:0016324);basolateral plasma membrane (GO:0016323);cytoplasm (GO:0005737);	Apoptosis;ATP-binding;Cell membrane;Complete proteome;Cytoplasm;Immunity;Innate immunity;Leucine-rich repeat;Membrane;Nucleotide-binding;Polymorphism;Reference proteome;Repeat;Ubl conjugation.;		-0.941351	0.516898	0.337397	1	29	44	36.5	NOD1
Locus_1026_Transcript_5/10_Confidence_0.200_Length_2355	2355	Locus_1026_Transcript_5/10_Confidence_0.200_Length_2355	2355	Locus_1026_Transcript_5/10_Confidence_0.200_Length_2355	2355	Q32LE4	70.303	2.18e-70	GGCT_BOVIN	Gamma-glutamylcyclotransferase	bta:533374	GO:0005829 \\ GO:0003839 \\ GO:0042803 \\ GO:0006750 \\ GO:0001836 \\	glutathione biosynthetic process (GO:0006750);release of cytochrome c from mitochondria (GO:0001836);	gamma-glutamylcyclotransferase activity (GO:0003839);protein homodimerization activity (GO:0042803);	cytosol (GO:0005829);	Acyltransferase;Complete proteome;Phosphoprotein;Reference proteome;Transferase.;		-0.641406	3.37207	0.452297	1	248	305	276.5	GGCT
Locus_1026_Transcript_6/10_Confidence_0.178_Length_1934	1934	Locus_1026_Transcript_6/10_Confidence_0.178_Length_1934	1934	Locus_1026_Transcript_6/10_Confidence_0.178_Length_1934	1934	Q32LE4	70.303	2.4e-71	GGCT_BOVIN	Gamma-glutamylcyclotransferase	bta:533374	GO:0005829 \\ GO:0003839 \\ GO:0042803 \\ GO:0006750 \\ GO:0001836 \\	glutathione biosynthetic process (GO:0006750);release of cytochrome c from mitochondria (GO:0001836);	gamma-glutamylcyclotransferase activity (GO:0003839);protein homodimerization activity (GO:0042803);	cytosol (GO:0005829);	Acyltransferase;Complete proteome;Phosphoprotein;Reference proteome;Transferase.;		0.386273	5.28409	0.645365	1	1358	819	1088.5	GGCT
Locus_10260_Transcript_1/2_Confidence_0.667_Length_922	922	Locus_10260_Transcript_1/2_Confidence_0.667_Length_922	922	Locus_10260_Transcript_1/2_Confidence_0.667_Length_922	922	Q9DAK9	64.789	6.62e-29	PHP14_MOUSE	14 kDa phosphohistidine phosphatase	mmu:75454	GO:0005829 \\ GO:0070062 \\ GO:0019855 \\ GO:0044325 \\ GO:0008969 \\ GO:0004721 \\ GO:2000984 \\ GO:0051350 \\ GO:0050860 \\ GO:0035971 \\ GO:2000147 \\ GO:0035774 \\ GO:0006470 \\ GO:2000249 \\	negative regulation of ATP citrate synthase activity (GO:2000984);negative regulation of lyase activity (GO:0051350);negative regulation of T cell receptor signaling pathway (GO:0050860);peptidyl-histidine dephosphorylation (GO:0035971);positive regulation of cell motility (GO:2000147);positive regulation of insulin secretion involved in cellular response to glucose stimulus (GO:0035774);protein …	calcium channel inhibitor activity (GO:0019855);ion channel binding (GO:0044325);phosphohistidine phosphatase activity (GO:0008969);phosphoprotein phosphatase activity (GO:0004721);	cytosol (GO:0005829);extracellular exosome (GO:0070062);	Complete proteome;Cytoplasm;Hydrolase;Protein phosphatase;Reference proteome.;		-0.242086	3.59739	0.778104	1	340	317	328.5	PHP14
Locus_10260_Transcript_2/2_Confidence_0.667_Length_1198	1198	Locus_10260_Transcript_2/2_Confidence_0.667_Length_1198	1198	Locus_10260_Transcript_2/2_Confidence_0.667_Length_1198	1198	Q9DAK9	76.667	1.72e-08	PHP14_MOUSE	14 kDa phosphohistidine phosphatase	mmu:75454	GO:0005829 \\ GO:0070062 \\ GO:0019855 \\ GO:0044325 \\ GO:0008969 \\ GO:0004721 \\ GO:2000984 \\ GO:0051350 \\ GO:0050860 \\ GO:0035971 \\ GO:2000147 \\ GO:0035774 \\ GO:0006470 \\ GO:2000249 \\	negative regulation of ATP citrate synthase activity (GO:2000984);negative regulation of lyase activity (GO:0051350);negative regulation of T cell receptor signaling pathway (GO:0050860);peptidyl-histidine dephosphorylation (GO:0035971);positive regulation of cell motility (GO:2000147);positive regulation of insulin secretion involved in cellular response to glucose stimulus (GO:0035774);protein …	calcium channel inhibitor activity (GO:0019855);ion channel binding (GO:0044325);phosphohistidine phosphatase activity (GO:0008969);phosphoprotein phosphatase activity (GO:0004721);	cytosol (GO:0005829);extracellular exosome (GO:0070062);	Complete proteome;Cytoplasm;Hydrolase;Protein phosphatase;Reference proteome.;		0.0997533	2.72191	0.908815	1	208	153	180.5	PHP14
Locus_102618_Transcript_1/1_Confidence_1.000_Length_265	265	No_sig_nr_hit	No_sig_nr_hit	No_sig_nr_hit	No_sig_nr_hit	No_Uniprotmatch	No_%_identity	No_evalue	No_ID	No_Description	No_KEGG	No_GO	No_GOCC	No_GOBP	No_GOMF	No_keywords		1.49403	0.523545	0.116548	1	61	17	39	No
Locus_10263_Transcript_1/2_Confidence_0.556_Length_623	623	No_sig_nr_hit	No_sig_nr_hit	No_sig_nr_hit	No_sig_nr_hit	No_Uniprotmatch	No_%_identity	No_evalue	No_ID	No_Description	No_KEGG	No_GO	No_GOCC	No_GOBP	No_GOMF	No_keywords		0.547467	0.197329	0.591497	1	39	21	30	No
Locus_10267_Transcript_1/2_Confidence_0.750_Length_1096	1096	No_sig_nr_hit	No_sig_nr_hit	No_sig_nr_hit	No_sig_nr_hit	No_Uniprotmatch	No_%_identity	No_evalue	No_ID	No_Description	No_KEGG	No_GO	No_GOCC	No_GOBP	No_GOMF	No_keywords		-0.500222	-0.449201	0.677475	1	17	19	18	No
Locus_10269_Transcript_1/3_Confidence_0.714_Length_5486	5486	Locus_10269_Transcript_1/3_Confidence_0.714_Length_5486	5486	Locus_10269_Transcript_1/3_Confidence_0.714_Length_5486	5486	Q14126	48.237	0	DSG2_HUMAN	Desmoglein-2	hsa:1829	GO:0016324 \\ GO:0009986 \\ GO:0005911 \\ GO:0030057 \\ GO:0070062 \\ GO:0016021 \\ GO:0014704 \\ GO:0016328 \\ GO:0005886 \\ GO:0005509 \\ GO:0050839 \\ GO:0086083 \\ GO:0006915 \\ GO:0086073 \\ GO:0007155 \\ GO:0006921 \\ GO:0002934 \\ GO:0007156 \\ GO:0060135 \\ GO:0012501 \\ GO:0003165 \\ GO:0086091 \\ GO:0098911 \\ GO:0032570 \\	apoptotic process (GO:0006915);bundle of His cell-Purkinje myocyte adhesion involved in cell communication (GO:0086073);cell adhesion (GO:0007155);cellular component disassembly involved in execution phase of apoptosis (GO:0006921);desmosome organization (GO:0002934);homophilic cell adhesion via plasma membrane adhesion molecules (GO:0007156);maternal process involved in female pregnancy (GO:0060…	calcium ion binding (GO:0005509);cell adhesion molecule binding (GO:0050839);cell adhesive protein binding involved in bundle of His cell-Purkinje myocyte communication (GO:0086083);	apical plasma membrane (GO:0016324);cell surface (GO:0009986);cell-cell junction (GO:0005911);desmosome (GO:0030057);extracellular exosome (GO:0070062);integral component of membrane (GO:0016021);intercalated disc (GO:0014704);lateral plasma membrane (GO:0016328);plasma membrane (GO:0005886);	3D-structure;Calcium;Cardiomyopathy;Cell adhesion;Cell junction;Cell membrane;Cleavage on pair of basic residues;Complete proteome;Disease mutation;Glycoprotein;Membrane;Metal-binding;Phosphoprotein;Polymorphism;Reference proteome;Repeat;Signal;Transmembrane;Transmembrane helix.;		0.0286783	1.13304	0.977356	1	66	51	58.5	DSG2
Locus_1027_Transcript_4/6_Confidence_0.333_Length_5117	5117	Locus_1027_Transcript_4/6_Confidence_0.333_Length_5117	5117	Locus_1027_Transcript_4/6_Confidence_0.333_Length_5117	5117	Q9NQL2	82	1.09e-16	RRAGD_HUMAN	Ras-related GTP-binding protein D	hsa:58528	GO:0005737 \\ GO:0005829 \\ GO:1990131 \\ GO:0005764 \\ GO:0005634 \\ GO:0005525 \\ GO:0003924 \\ GO:0046982 \\ GO:0007050 \\ GO:0034613 \\ GO:0071230 \\ GO:0009267 \\ GO:0010467 \\ GO:0008286 \\ GO:0016236 \\ GO:0032008 \\ GO:0006367 \\	cell cycle arrest (GO:0007050);cellular protein localization (GO:0034613);cellular response to amino acid stimulus (GO:0071230);cellular response to starvation (GO:0009267);gene expression (GO:0010467);insulin receptor signaling pathway (GO:0008286);macroautophagy (GO:0016236);positive regulation of TOR signaling (GO:0032008);transcription initiation from RNA polymerase II promoter (GO:0006367);	GTP binding (GO:0005525);GTPase activity (GO:0003924);protein heterodimerization activity (GO:0046982);	cytoplasm (GO:0005737);cytosol (GO:0005829);Gtr1-Gtr2 GTPase complex (GO:1990131);lysosome (GO:0005764);nucleus (GO:0005634);	3D-structure;Alternative splicing;Complete proteome;Cytoplasm;GTP-binding;Lysosome;Nucleotide-binding;Nucleus;Reference proteome.;		0.73621	3.21021	0.389555	1	353	167	260	RRAGD
Locus_1027_Transcript_5/6_Confidence_0.250_Length_2055	2055	Locus_1027_Transcript_5/6_Confidence_0.250_Length_2055	2055	Locus_1027_Transcript_5/6_Confidence_0.250_Length_2055	2055	Q9NQL2	94.19	0	RRAGD_HUMAN	Ras-related GTP-binding protein D	hsa:58528	GO:0005737 \\ GO:0005829 \\ GO:1990131 \\ GO:0005764 \\ GO:0005634 \\ GO:0005525 \\ GO:0003924 \\ GO:0046982 \\ GO:0007050 \\ GO:0034613 \\ GO:0071230 \\ GO:0009267 \\ GO:0010467 \\ GO:0008286 \\ GO:0016236 \\ GO:0032008 \\ GO:0006367 \\	cell cycle arrest (GO:0007050);cellular protein localization (GO:0034613);cellular response to amino acid stimulus (GO:0071230);cellular response to starvation (GO:0009267);gene expression (GO:0010467);insulin receptor signaling pathway (GO:0008286);macroautophagy (GO:0016236);positive regulation of TOR signaling (GO:0032008);transcription initiation from RNA polymerase II promoter (GO:0006367);	GTP binding (GO:0005525);GTPase activity (GO:0003924);protein heterodimerization activity (GO:0046982);	cytoplasm (GO:0005737);cytosol (GO:0005829);Gtr1-Gtr2 GTPase complex (GO:1990131);lysosome (GO:0005764);nucleus (GO:0005634);	3D-structure;Alternative splicing;Complete proteome;Cytoplasm;GTP-binding;Lysosome;Nucleotide-binding;Nucleus;Reference proteome.;		-0.556064	1.04627	0.543916	1	50	58	54	RRAGD
[truncated: 30,664 more rows]
