# Supplementary material for: Characterization of a de novo assembled transcriptome of the Common Blackbird (Turdus merula)
Source: PeerJ. 2017 Dec 13;5:e4045. doi: 10.7717/peerj.4045 (PMC5732540; doi:10.7717/peerj.4045)
Supplement: Table S5 — The table is provided as created by BCFtools. [file peerj-05-4045-s005.xlsx]

## Sheet: Supplemental table S5
CONTIG	POS	ID	REF	ALT	QUAL	FILTER	INFO	FORMAT	URBAN	RURAL
Locus_1_Transcript_2/4_Confidence_0.700_Length_9592	292	.	C	T	186	PASS	DP=62;VDB=0.710969;SGB=13.0002;RPB=0.999305;MQB=1;MQSB=1;BQB=0.630513;MQ0F=0;ICB=0.5;HOB=0.5;AC=2;AN=4;DP4=22,9,8,13;MQ=42	GT:PL:DP:DV:SP:DP4	0/0:0,93,255:31:0:0:22,9,0,0	1/1:255,63,0:21:21:0:0,0,8,13
Locus_1_Transcript_2/4_Confidence_0.700_Length_9592	911	.	A	G	124	PASS	DP=62;VDB=0.963982;SGB=6.07412;RPB=0.841709;MQB=1;MQSB=1;BQB=0.24006;MQ0F=0;ICB=0.3;HOB=0.125;AC=1;AN=4;DP4=31,7,9,2;MQ=42	GT:PL:DP:DV:SP:DP4	0/0:0,81,255:27:0:0:20,7,0,0	0/1:188,0,154:22:11:3:11,0,9,2
Locus_1_Transcript_2/4_Confidence_0.700_Length_9592	991	.	T	C	168	PASS	DP=85;VDB=0.0421078;SGB=6.76576;RPB=0.996234;MQB=1;MQSB=1;BQB=0.471004;MQ0F=0;ICB=0.3;HOB=0.125;AC=1;AN=4;DP4=34,6,8,4;MQ=42	GT:PL:DP:DV:SP:DP4	0/0:0,75,255:25:0:0:19,6,0,0	0/1:232,0,182:27:12:15:15,0,8,4
Locus_1_Transcript_2/4_Confidence_0.700_Length_9592	1152	.	T	C	186	PASS	DP=60;VDB=0.428984;SGB=13.6932;RPB=0.34962;MQB=1;MQSB=1;BQB=0.815018;MQ0F=0;ICB=0.5;HOB=0.5;AC=2;AN=4;DP4=18,7,12,10;MQ=42	GT:PL:DP:DV:SP:DP4	1/1:255,66,0:22:22:0:0,0,12,10	0/0:0,75,255:25:0:0:18,7,0,0
Locus_1_Transcript_2/4_Confidence_0.700_Length_9592	1797	.	T	C	424	PASS	DP=70;VDB=0.782372;SGB=-1.37095;RPB=0.971914;MQB=0.394462;MQSB=0.31014;BQB=0.035838;MQ0F=0;ICB=0.3;HOB=0.125;AC=3;AN=4;DP4=7,3,34,9;MQ=41	GT:PL:DP:DV:SP:DP4	1/1:255,78,0:26:26:0:0,0,19,7	0/1:233,0,179:27:17:5:7,3,15,2
Locus_1_Transcript_2/4_Confidence_0.700_Length_9592	1819	.	T	C	424	PASS	DP=61;VDB=0.480849;SGB=-1.38086;RPB=0.986294;MQB=0.269291;MQSB=0.321262;BQB=0.436518;MQ0F=0;ICB=0.3;HOB=0.125;AC=3;AN=4;DP4=7,2,31,6;MQ=41	GT:PL:DP:DV:SP:DP4	1/1:255,60,0:20:20:0:0,0,16,4	0/1:233,0,168:26:17:2:7,2,15,2
Locus_1_Transcript_2/4_Confidence_0.700_Length_9592	1867	.	A	G	446	PASS	DP=64;VDB=0.63013;SGB=-1.36908;RPB=0.522199;MQB=0.551238;MQSB=0.883837;BQB=0.931777;MQ0F=0;ICB=0.3;HOB=0.125;AC=3;AN=4;DP4=6,4,30,10;MQ=41	GT:PL:DP:DV:SP:DP4	1/1:255,72,0:24:24:0:0,0,18,6	0/1:255,0,196:26:16:2:6,4,12,4
Locus_1_Transcript_2/4_Confidence_0.700_Length_9592	2047	.	G	A	120	PASS	DP=90;VDB=0.0272959;SGB=6.76576;RPB=0.262057;MQB=1;MQSB=1;BQB=0.22965;MQ0F=0;ICB=0.3;HOB=0.125;AC=1;AN=4;DP4=34,17,11,1;MQ=42	GT:PL:DP:DV:SP:DP4	0/1:184,0,255:35:12:7:16,7,11,1	0/0:0,84,255:28:0:0:18,10,0,0
Locus_1_Transcript_2/4_Confidence_0.700_Length_9592	2207	.	T	C	300	PASS	DP=74;VDB=0.610267;SGB=-9.32613;RPB=0.144906;MQB=1;MQSB=1;BQB=0.915612;MQ0F=0;ICB=0.5;HOB=0.5;AC=2;AN=4;DP4=18,11,20,4;MQ=42	GT:PL:DP:DV:SP:DP4	0/1:108,0,255:28:7:11:13,8,7,0	0/1:255,0,167:25:17:2:5,3,13,4
Locus_1_Transcript_2/4_Confidence_0.700_Length_9592	2531	.	A	C	176	PASS	DP=92;VDB=0.289477;SGB=9.53539;RPB=0.432847;MQB=0.993104;MQSB=0.988535;BQB=0.432847;MQ0F=0;ICB=0.3;HOB=0.125;AC=1;AN=4;DP4=30,21,14,2;MQ=41	GT:PL:DP:DV:SP:DP4	0/0:0,111,255:37:0:0:21,16,0,0	0/1:240,0,255:30:16:7:9,5,14,2
Locus_1_Transcript_2/4_Confidence_0.700_Length_9592	3025	.	A	G	90	PASS	DP=35;VDB=0.0281189;SGB=4.00342;RPB=0.122456;MQB=0.708895;MQSB=0.999737;BQB=0.765017;MQ0F=0;ICB=0.3;HOB=0.125;AC=1;AN=4;DP4=12,9,7,1;MQ=39	GT:PL:DP:DV:SP:DP4	0/1:155,0,73:11:8:3:2,1,7,1	0/0:0,54,255:18:0:0:10,8,0,0
Locus_1_Transcript_2/4_Confidence_0.700_Length_9592	3087	.	T	C	187	PASS	DP=29;VDB=0.933675;SGB=-5.64284;RPB=0.511891;MQB=0.937241;MQSB=0.975611;BQB=0.496717;MQ0F=0;ICB=0.3;HOB=0.125;AC=3;AN=4;DP4=8,6,10,2;MQ=41	GT:PL:DP:DV:SP:DP4	1/1:231,30,0:10:10:0:0,0,8,2	0/1:21,0,252:16:2:3:8,6,2,0
Locus_1_Transcript_2/4_Confidence_0.700_Length_9592	3110	.	T	G	97	PASS	DP=34;VDB=0.784517;SGB=-4.41269;RPB=0.41985;MQB=0.876998;MQSB=0.965321;BQB=1;MQ0F=0;ICB=0.5;HOB=0.5;AC=2;AN=4;DP4=13,8,4,4;MQ=41	GT:PL:DP:DV:SP:DP4	0/1:144,0,139:12:6:0:3,3,2,4	0/1:18,0,255:17:2:0:10,5,2,0
Locus_1_Transcript_2/4_Confidence_0.700_Length_9592	3251	.	C	G	103	PASS	DP=44;VDB=0.426633;SGB=4.00342;RPB=0.89135;MQB=1;MQSB=1;BQB=0.89135;MQ0F=0;ICB=0.3;HOB=0.125;AC=1;AN=4;DP4=11,18,4,4;MQ=42	GT:PL:DP:DV:SP:DP4	0/1:167,0,243:20:8:2:4,8,4,4	0/0:0,51,255:17:0:0:7,10,0,0
Locus_1_Transcript_2/4_Confidence_0.700_Length_9592	3353	.	T	A	86	PASS	DP=28;VDB=0.612254;SGB=2.63044;RPB=0.866141;MQB=1;MQSB=1;BQB=0.374189;MQ0F=0;ICB=0.3;HOB=0.125;AC=1;AN=4;DP4=6,8,5,1;MQ=42	GT:PL:DP:DV:SP:DP4	0/0:0,18,165:6:0:0:1,5,0,0	0/1:150,0,206:14:6:2:5,3,5,1
Locus_1_Transcript_2/4_Confidence_0.700_Length_9592	3354	.	A	T	86	PASS	DP=28;VDB=0.612254;SGB=2.63044;RPB=0.884751;MQB=1;MQSB=1;BQB=0.374189;MQ0F=0;ICB=0.3;HOB=0.125;AC=1;AN=4;DP4=6,8,5,1;MQ=42	GT:PL:DP:DV:SP:DP4	0/0:0,18,168:6:0:0:1,5,0,0	0/1:150,0,206:14:6:2:5,3,5,1
Locus_1_Transcript_2/4_Confidence_0.700_Length_9592	3422	.	C	T	99	PASS	DP=23;VDB=0.177551;SGB=-3.79618;RPB=0.664254;MQB=1;MQSB=1;BQB=0.664254;MQ0F=0;ICB=0.5;HOB=0.5;AC=2;AN=4;DP4=7,4,4,2;MQ=42	GT:PL:DP:DV:SP:DP4	0/1:80,0,163:10:3:0:4,3,1,2	0/1:83,0,124:7:3:0:3,1,3,0
Locus_1_Transcript_2/4_Confidence_0.700_Length_9592	3556	.	A	G	93	PASS	DP=55;VDB=0.472523;SGB=4.69269;RPB=0.818276;MQB=1;MQSB=1;BQB=0.606531;MQ0F=0;ICB=0.3;HOB=0.125;AC=1;AN=4;DP4=29,1,9,0;MQ=42	GT:PL:DP:DV:SP:DP4	0/0:0,60,218:20:0:0:20,0,0,0	0/1:157,0,185:19:9:0:9,1,9,0
Locus_1_Transcript_2/4_Confidence_0.700_Length_9592	3746	.	G	C	344	PASS	DP=58;VDB=0.378017;SGB=-9.93983;RPB=0.895113;MQB=1;MQSB=1;BQB=0.629016;MQ0F=0;ICB=0.3;HOB=0.125;AC=3;AN=4;DP4=13,8,12,14;MQ=42	GT:PL:DP:DV:SP:DP4	0/1:154,0,255:29:8:4:13,8,3,5	1/1:255,54,0:18:18:0:0,0,9,9
Locus_1_Transcript_2/4_Confidence_0.700_Length_9592	3805	.	A	C	121	PASS	DP=49;VDB=0.664072;SGB=4.00342;RPB=0.572437;MQB=1;MQSB=1;BQB=0.529375;MQ0F=0;ICB=0.3;HOB=0.125;AC=1;AN=4;DP4=19,11,5,3;MQ=42	GT:PL:DP:DV:SP:DP4	0/0:0,75,255:25:0:0:15,10,0,0	0/1:185,0,130:13:8:0:4,1,5,3
Locus_1_Transcript_2/4_Confidence_0.700_Length_9592	3807	.	A	C	131	PASS	DP=49;VDB=0.668412;SGB=4.00342;RPB=0.66989;MQB=1;MQSB=1;BQB=0.812457;MQ0F=0;ICB=0.3;HOB=0.125;AC=1;AN=4;DP4=19,11,5,3;MQ=42	GT:PL:DP:DV:SP:DP4	0/0:0,75,255:25:0:0:15,10,0,0	0/1:195,0,130:13:8:0:4,1,5,3
Locus_1_Transcript_2/4_Confidence_0.700_Length_9592	3890	.	C	G	136	PASS	DP=47;VDB=0.149607;SGB=4.00342;RPB=0.194444;MQB=1;MQSB=1;BQB=0.139184;MQ0F=0;ICB=0.3;HOB=0.125;AC=1;AN=4;DP4=17,17,5,3;MQ=42	GT:PL:DP:DV:SP:DP4	0/0:0,87,255:29:0:0:14,15,0,0	0/1:200,0,125:13:8:0:3,2,5,3
Locus_1_Transcript_2/4_Confidence_0.700_Length_9592	3958	.	A	T	179	PASS	DP=57;VDB=0.685471;SGB=6.76576;RPB=0.472183;MQB=1;MQSB=1;BQB=0.0325556;MQ0F=0;ICB=0.3;HOB=0.125;AC=1;AN=4;DP4=23,7,5,7;MQ=42	GT:PL:DP:DV:SP:DP4	0/0:0,75,255:25:0:0:20,5,0,0	0/1:243,0,127:17:12:2:3,2,5,7
Locus_1_Transcript_2/4_Confidence_0.700_Length_9592	4114	.	T	A	147	PASS	DP=27;VDB=0.540394;SGB=4.00342;RPB=0.776754;MQB=1;MQSB=1;BQB=0.673857;MQ0F=0;ICB=0.3;HOB=0.125;AC=1;AN=4;DP4=5,5,5,3;MQ=42	GT:PL:DP:DV:SP:DP4	0/0:0,21,204:7:0:0:3,4,0,0	0/1:212,0,73:11:8:0:2,1,5,3
Locus_1_Transcript_2/4_Confidence_0.700_Length_9592	4195	.	T	C	156	PASS	DP=41;VDB=0.0049563;SGB=7.4578;RPB=0.569669;MQB=0.966712;MQSB=0.983828;BQB=0.678534;MQ0F=0;ICB=0.3;HOB=0.125;AC=1;AN=4;DP4=12,6,11,2;MQ=41	GT:PL:DP:DV:SP:DP4	0/1:221,0,24:15:13:12:0,2,11,2	0/0:0,48,255:16:0:0:12,4,0,0
Locus_1_Transcript_2/4_Confidence_0.700_Length_9592	4495	.	C	T	68	PASS	DP=30;VDB=0.575151;SGB=1.94933;RPB=0.62535;MQB=1;MQSB=1;BQB=0.77826;MQ0F=0;ICB=0.3;HOB=0.125;AC=1;AN=4;DP4=7,11,2,3;MQ=42	GT:PL:DP:DV:SP:DP4	0/0:0,27,254:9:0:0:5,4,0,0	0/1:132,0,195:14:5:2:2,7,2,3
Locus_1_Transcript_2/4_Confidence_0.700_Length_9592	4883	.	T	C	106	PASS	DP=52;VDB=0.594064;SGB=5.38303;RPB=0.728189;MQB=1;MQSB=1;BQB=0.388917;MQ0F=0;ICB=0.3;HOB=0.125;AC=1;AN=4;DP4=28,2,9,1;MQ=42	GT:PL:DP:DV:SP:DP4	0/0:0,51,250:17:0:0:16,1,0,0	0/1:170,0,200:23:10:0:12,1,9,1
Locus_1_Transcript_2/4_Confidence_0.700_Length_9592	4935	.	G	A	144	PASS	DP=62;VDB=0.0383199;SGB=6.76576;RPB=0.784861;MQB=0.986143;MQSB=0.980807;BQB=0.0251074;MQ0F=0;ICB=0.3;HOB=0.125;AC=1;AN=4;DP4=16,14,11,1;MQ=41	GT:PL:DP:DV:SP:DP4	0/0:0,54,255:18:0:0:7,11,0,0	0/1:208,0,226:24:12:2:9,3,11,1
Locus_1_Transcript_2/4_Confidence_0.700_Length_9592	5113	.	G	A	105	PASS	DP=35;VDB=0.596338;SGB=3.31571;RPB=0.955245;MQB=1;MQSB=1;BQB=0.480657;MQ0F=0;ICB=0.3;HOB=0.125;AC=1;AN=4;DP4=12,6,4,3;MQ=42	GT:PL:DP:DV:SP:DP4	0/0:0,33,255:11:0:0:7,4,0,0	0/1:169,0,169:14:7:0:5,2,4,3
Locus_1_Transcript_2/4_Confidence_0.700_Length_9592	5196	.	G	A	229	PASS	DP=30;VDB=0.678651;SGB=-5.33664;RPB=0.781682;MQB=1;MQSB=1;BQB=0.637085;MQ0F=0;ICB=0.5;HOB=0.5;AC=2;AN=4;DP4=6,2,9,2;MQ=42	GT:PL:DP:DV:SP:DP4	0/1:195,0,42:9:7:0:2,0,5,2	0/1:98,0,168:10:4:3:4,2,4,0
Locus_1_Transcript_2/4_Confidence_0.700_Length_9592	5220	.	C	A	202	PASS	DP=17;VDB=0.0375418;SGB=-4.72235;RPB=0.411112;MQB=1;MQSB=1;BQB=0.945959;MQ0F=0;ICB=0.3;HOB=0.125;AC=3;AN=4;DP4=2,3,6,3;MQ=42	GT:PL:DP:DV:SP:DP4	1/1:156,15,0:5:5:0:0,0,4,1	0/1:110,0,133:9:4:0:2,3,2,2
Locus_1_Transcript_2/4_Confidence_0.700_Length_9592	5297	.	T	C	74	PASS	DP=21;VDB=0.0702932;SGB=1.94933;RPB=0.906304;MQB=0.885629;MQSB=0.885629;BQB=0.998786;MQ0F=0;ICB=0.3;HOB=0.125;AC=1;AN=4;DP4=11,2,2,3;MQ=41	GT:PL:DP:DV:SP:DP4	0/0:0,24,193:8:0:0:7,1,0,0	0/1:138,0,129:10:5:3:4,1,2,3
Locus_1_Transcript_2/4_Confidence_0.700_Length_9592	5880	.	A	T	94	PASS	DP=27;VDB=0.247382;SGB=2.63044;RPB=0.896649;MQB=1;MQSB=1;BQB=0.2628;MQ0F=0;ICB=0.3;HOB=0.125;AC=1;AN=4;DP4=9,6,5,1;MQ=42	GT:PL:DP:DV:SP:DP4	0/1:159,0,50:8:6:3:1,1,5,1	0/0:0,39,255:13:0:0:8,5,0,0
Locus_1_Transcript_2/4_Confidence_0.700_Length_9592	5942	.	T	G	140	PASS	DP=39;VDB=0.788314;SGB=5.38303;RPB=0.584267;MQB=1;MQSB=1;BQB=0.878858;MQ0F=0;ICB=0.3;HOB=0.125;AC=1;AN=4;DP4=16,6,7,3;MQ=42	GT:PL:DP:DV:SP:DP4	0/0:0,33,255:11:0:0:7,4,0,0	0/1:204,0,214:21:10:2:9,2,7,3
Locus_1_Transcript_2/4_Confidence_0.700_Length_9592	6161	.	G	A	191	PASS	DP=495;VDB=0.534858;SGB=98.9501;RPB=0.958287;MQB=0.903204;MQSB=0.994813;BQB=0.893097;MQ0F=0;ICB=0.3;HOB=0.125;AC=1;AN=4;DP4=214,18,134,11;MQ=41	GT:PL:DP:DV:SP:DP4	0/0:0,255,255:128:0:0:115,13,0,0	0/1:255,0,255:249:145:4:99,5,134,11
Locus_1_Transcript_2/4_Confidence_0.700_Length_9592	6383	.	A	G	150	PASS	DP=1556;VDB=0.570785;SGB=72.6106;RPB=0.0939925;MQB=0.999669;MQSB=0.999778;BQB=0.724562;MQ0F=0.00128535;ICB=0.3;HOB=0.125;AC=1;AN=4;DP4=663,488,64,43;MQ=41	GT:PL:DP:DV:SP:DP4	0/1:215,0,255:360:107:4:164,89,64,43	0/0:0,255,255:898:0:0:499,399,0,0
Locus_1_Transcript_2/4_Confidence_0.700_Length_9592	6461	.	T	C	191	PASS	DP=1561;VDB=0.144393;SGB=-70.083;RPB=0.789639;MQB=0.999986;MQSB=0.932731;BQB=0.911675;MQ0F=0;ICB=0.3;HOB=0.125;AC=1;AN=4;DP4=592,323,143,79;MQ=41	GT:PL:DP:DV:SP:DP4	0/1:255,0,255:357:221:10:100,36,143,78	0/0:0,255,255:780:1:0:492,287,0,1
Locus_1_Transcript_2/4_Confidence_0.700_Length_9592	6953	.	G	A	446	PASS	DP=1446;VDB=0.269768;SGB=-136.363;RPB=0.765347;MQB=0.996334;MQSB=0.994866;BQB=0.829856;MQ0F=0;ICB=0.5;HOB=0.5;AC=2;AN=4;DP4=416,244,291,147;MQ=41	GT:PL:DP:DV:SP:DP4	0/1:255,0,255:394:154:7:158,82,112,42	0/1:255,0,255:704:284:2:258,162,179,105
Locus_1_Transcript_2/4_Confidence_0.700_Length_9592	7430	.	T	C	191	PASS	DP=1409;VDB=5.98063e-05;SGB=164.799;RPB=0.0698154;MQB=0.962862;MQSB=0.932525;BQB=0.702389;MQ0F=0;ICB=0.3;HOB=0.125;AC=1;AN=4;DP4=466,341,128,112;MQ=41	GT:PL:DP:DV:SP:DP4	0/0:0,255,255:424:0:0:267,157,0,0	0/1:255,0,255:623:240:1:199,184,128,112
Locus_1_Transcript_2/4_Confidence_0.700_Length_9592	7451	.	C	T	186	PASS	DP=1410;VDB=0.00559927;SGB=406.014;RPB=0.387359;MQB=0.965534;MQSB=0.96311;BQB=0.00898902;MQ0F=0;ICB=0.5;HOB=0.5;AC=2;AN=4;DP4=275,165,301,287;MQ=41	GT:PL:DP:DV:SP:DP4	0/0:0,255,255:439:0:0:275,164,0,0	1/1:255,255,0:589:588:0:0,1,301,287
Locus_1_Transcript_2/4_Confidence_0.700_Length_9592	7591	.	C	T	191	PASS	DP=1223;VDB=0.99493;SGB=148.857;RPB=0.165376;MQB=0.979013;MQSB=0.997998;BQB=0.963912;MQ0F=0;ICB=0.3;HOB=0.125;AC=1;AN=4;DP4=485,177,180,37;MQ=41	GT:PL:DP:DV:SP:DP4	0/0:0,255,255:296:0:0:211,85,0,0	0/1:255,0,255:583:217:16:274,92,180,37
Locus_1_Transcript_2/4_Confidence_0.700_Length_9592	7775	.	T	C	186	PASS	DP=898;VDB=0.649419;SGB=-79.2886;RPB=0.834481;MQB=0.99998;MQSB=0.999429;BQB=0.979702;MQ0F=0;ICB=0.5;HOB=0.5;AC=2;AN=4;DP4=262,208,157,95;MQ=41	GT:PL:DP:DV:SP:DP4	1/1:255,255,0:250:250:0:0,0,157,93	0/0:0,255,255:472:2:7:262,208,0,2
Locus_1_Transcript_2/4_Confidence_0.700_Length_9592	9113	.	C	G	191	PASS	DP=137;VDB=0.970511;SGB=13.6932;RPB=0.990433;MQB=0.98494;MQSB=0.997847;BQB=0.290913;MQ0F=0;ICB=0.3;HOB=0.125;AC=1;AN=4;DP4=55,38,14,8;MQ=41	GT:PL:DP:DV:SP:DP4	0/0:0,202,255:67:0:0:36,31,0,0	0/1:255,0,255:48:22:3:19,7,14,8
Locus_1_Transcript_2/4_Confidence_0.700_Length_9592	9182	.	C	G	191	PASS	DP=135;VDB=4.54573e-05;SGB=-10.8604;RPB=0.985366;MQB=0.963333;MQSB=0.983694;BQB=0.187669;MQ0F=0;ICB=0.3;HOB=0.125;AC=1;AN=4;DP4=43,35,15,14;MQ=41	GT:PL:DP:DV:SP:DP4	0/0:0,135,255:57:1:0:31,25,0,1	0/1:255,0,255:50:28:0:12,10,15,13
Locus_1_Transcript_2/4_Confidence_0.700_Length_9592	9394	.	G	T	101	PASS	DP=110;VDB=0.0190538;SGB=6.76576;RPB=0.709195;MQB=0.976421;MQSB=0.987502;BQB=0.715767;MQ0F=0;ICB=0.3;HOB=0.125;AC=1;AN=4;DP4=21,62,5,7;MQ=41	GT:PL:DP:DV:SP:DP4	0/0:0,178,255:59:0:0:13,46,0,0	0/1:166,0,255:36:12:1:8,16,5,7
Locus_1_Transcript_2/4_Confidence_0.700_Length_9592	9511	.	G	C	161	PASS	DP=26;VDB=0.213703;SGB=-5.64373;RPB=0.999108;MQB=0.977926;MQSB=0.923116;BQB=0.040184;MQ0F=0;ICB=0.3;HOB=0.125;AC=3;AN=4;DP4=3,4,1,11;MQ=41	GT:PL:DP:DV:SP:DP4	0/1:86,0,189:12:5:2:3,4,1,4	1/1:139,21,0:7:7:0:0,0,0,7
Locus_2_Transcript_4/4817_Confidence_1.000_Length_285	61	.	G	A	78	PASS	DP=7705;VDB=0;SGB=-1.38629;RPB=1;MQB=1;MQSB=0.309034;BQB=1;MQ0F=0.44218;AC=4;AN=4;DP4=1,0,4644,10;MQ=4	GT:PL:DP:DV:SP:DP4	1/1:75,255,0:2819:2818:0:1,0,2808,10	1/1:57,255,0:1836:1836:0:0,0,1836,0
Locus_2_Transcript_4/4817_Confidence_1.000_Length_285	62	.	A	G	99	PASS	DP=7705;VDB=0;SGB=-1.38629;RPB=0.870699;MQB=0.284752;MQSB=0.309681;BQB=0.472618;MQ0F=0.44218;AC=4;AN=4;DP4=9,0,4638,10;MQ=4	GT:PL:DP:DV:SP:DP4	1/1:85,255,0:2822:2817:0:5,0,2808,9	1/1:68,255,0:1835:1831:0:4,0,1830,1
Locus_2_Transcript_4/4817_Confidence_1.000_Length_285	64	.	G	A	80	PASS	DP=7705;VDB=0;SGB=-1.38629;RPB=0.728518;MQB=0.667815;MQSB=0.206697;BQB=0.0144488;MQ0F=0.44218;AC=4;AN=4;DP4=3,0,4640,13;MQ=4	GT:PL:DP:DV:SP:DP4	1/1:68,255,0:2821:2818:0:3,0,2805,13	1/1:66,255,0:1835:1835:0:0,0,1835,0
Locus_2_Transcript_7/4817_Confidence_1.000_Length_268	129	.	T	C	102	PASS	DP=7165;VDB=0;SGB=-1.38629;RPB=0.985944;MQB=0.907631;MQSB=0.0264156;BQB=0.497992;MQ0F=0.150872;AC=4;AN=4;DP4=0,2,64,185;MQ=9	GT:PL:DP:DV:SP:DP4	1/1:104,255,0:121:120:0:0,1,30,90	1/1:52,255,0:130:129:0:0,1,34,95
Locus_2_Transcript_7/4817_Confidence_1.000_Length_268	152	.	G	T	209	PASS	DP=8009;VDB=0;SGB=-1.38629;RPB=0.364243;MQB=0.994009;MQSB=0.178435;BQB=0.0219227;MQ0F=0.147709;AC=4;AN=4;DP4=0,2,4054,3290;MQ=6	GT:PL:DP:DV:SP:DP4	1/1:139,255,0:3535:3533:6:0,2,1768,1765	1/1:124,255,0:3811:3811:0:0,0,2286,1525
Locus_2_Transcript_8/4817_Confidence_1.000_Length_299	39	.	A	C	152	PASS	DP=8076;VDB=0;SGB=-1.38629;RPB=0.731775;MQB=0.225512;BQB=0.00264322;MQ0F=0.231798;AC=4;AN=4;DP4=6,0,8059,0;MQ=9	GT:PL:DP:DV:SP:DP4	1/1:97,255,0:4034:4029:0:5,0,4029,0	1/1:109,255,0:4031:4030:0:1,0,4030,0
Locus_2_Transcript_8/4817_Confidence_1.000_Length_299	44	.	A	C	139	PASS	DP=8085;VDB=0;SGB=-1.38629;RPB=0.919121;MQB=0.691808;BQB=0.0112253;MQ0F=0.23154;AC=4;AN=4;DP4=5,0,8073,0;MQ=8	GT:PL:DP:DV:SP:DP4	1/1:98,255,0:4041:4036:0:5,0,4036,0	1/1:95,255,0:4037:4037:0:0,0,4037,0
Locus_2_Transcript_8/4817_Confidence_1.000_Length_299	48	.	A	T	170	PASS	DP=8094;VDB=0;SGB=-1.38629;RPB=1;MQB=1;BQB=1;MQ0F=0.23153;AC=4;AN=4;DP4=1,0,8085,0;MQ=8	GT:PL:DP:DV:SP:DP4	1/1:110,255,0:4045:4044:0:1,0,4044,0	1/1:114,255,0:4041:4041:0:0,0,4041,0
Locus_2_Transcript_8/4817_Confidence_1.000_Length_299	61	.	C	G	167	PASS	DP=8120;VDB=0;SGB=-1.38629;RPB=0.981197;MQB=0.995834;BQB=0.0137525;MQ0F=0.230911;AC=4;AN=4;DP4=3,0,8107,0;MQ=8	GT:PL:DP:DV:SP:DP4	1/1:109,255,0:4056:4053:0:3,0,4053,0	1/1:112,255,0:4054:4054:0:0,0,4054,0
Locus_2_Transcript_8/4817_Confidence_1.000_Length_299	71	.	A	C	148	PASS	DP=8140;VDB=0;SGB=-1.38629;RPB=0.695581;MQB=0.672861;BQB=0.0131568;MQ0F=0.230713;AC=4;AN=4;DP4=3,0,8130,0;MQ=8	GT:PL:DP:DV:SP:DP4	1/1:94,255,0:4068:4065:0:3,0,4065,0	1/1:108,255,0:4065:4065:0:0,0,4065,0
Locus_2_Transcript_8/4817_Confidence_1.000_Length_299	156	.	G	C	80	PASS	DP=345;VDB=4.37422e-26;SGB=-1.38615;RPB=0.00320256;MQB=0.324273;MQSB=0.324857;BQB=0.00238597;MQ0F=0.382609;AC=4;AN=4;DP4=0,8,112,212;MQ=4	GT:PL:DP:DV:SP:DP4	1/1:49,255,0:103:102:0:0,1,57,45	1/1:85,255,0:229:222:7:0,7,55,167
Locus_2_Transcript_9/4817_Confidence_1.000_Length_3488	270	.	G	A	97	PASS	DP=57;VDB=0.0348254;SGB=4.69269;RPB=0.697471;MQB=1;MQSB=1;BQB=0.467663;MQ0F=0;ICB=0.3;HOB=0.125;AC=1;AN=4;DP4=23,1,9,0;MQ=42	GT:PL:DP:DV:SP:DP4	0/0:0,63,225:21:0:0:21,0,0,0	0/1:162,0,75:12:9:0:2,1,9,0
Locus_2_Transcript_9/4817_Confidence_1.000_Length_3488	488	.	T	C	182	PASS	DP=112;VDB=0.564973;SGB=8.15014;RPB=0.864169;MQB=1;MQSB=1;BQB=0.152306;MQ0F=0;ICB=0.3;HOB=0.125;AC=1;AN=4;DP4=55,9,9,5;MQ=42	GT:PL:DP:DV:SP:DP4	0/0:0,154,255:51:0:0:44,7,0,0	0/1:246,0,167:27:14:4:11,2,9,5
Locus_2_Transcript_9/4817_Confidence_1.000_Length_3488	503	.	C	A	191	PASS	DP=140;VDB=0.780368;SGB=10.2282;RPB=0.901476;MQB=1;MQSB=1;BQB=0.453687;MQ0F=0;ICB=0.3;HOB=0.125;AC=1;AN=4;DP4=62,18,11,6;MQ=42	GT:PL:DP:DV:SP:DP4	0/0:0,175,255:58:0:0:45,13,0,0	0/1:255,0,255:39:17:3:17,5,11,6
Locus_2_Transcript_9/4817_Confidence_1.000_Length_3488	692	.	C	T	191	PASS	DP=122;VDB=0.120327;SGB=13.6932;RPB=0.589674;MQB=1;MQSB=1;BQB=0.938162;MQ0F=0;ICB=0.3;HOB=0.125;AC=1;AN=4;DP4=35,38,14,8;MQ=42	GT:PL:DP:DV:SP:DP4	0/0:0,181,255:60:0:0:31,29,0,0	0/1:255,0,224:35:22:11:4,9,14,8
Locus_2_Transcript_9/4817_Confidence_1.000_Length_3488	1387	.	C	T	191	PASS	DP=2048;VDB=1;SGB=139.153;RPB=0.989385;MQB=0.991756;MQSB=0.99563;BQB=0.386856;MQ0F=0;ICB=0.3;HOB=0.125;AC=1;AN=4;DP4=1305,27,200,3;MQ=41	GT:PL:DP:DV:SP:DP4	0/0:0,255,255:1086:0:0:1064,22,0,0	0/1:255,0,255:449:203:1:241,5,200,3
Locus_2_Transcript_9/4817_Confidence_1.000_Length_3488	1413	.	T	C	191	PASS	DP=2517;VDB=0.99999;SGB=-198.041;RPB=0.861887;MQB=0.974435;MQSB=0.996587;BQB=0.212674;MQ0F=0;ICB=0.3;HOB=0.125;AC=1;AN=4;DP4=1185,118,586,53;MQ=41	GT:PL:DP:DV:SP:DP4	0/1:255,0,255:1340:638:11:624,78,586,52	0/0:0,255,255:602:1:0:561,40,0,1
Locus_2_Transcript_9/4817_Confidence_1.000_Length_3488	1626	.	A	T	447	PASS	DP=2957;VDB=0.000635356;SGB=-338.272;RPB=0.50298;MQB=0.999192;MQSB=0.997773;BQB=0.818606;MQ0F=0.000676361;ICB=0.5;HOB=0.5;AC=2;AN=4;DP4=772,486,687,409;MQ=41	GT:PL:DP:DV:SP:DP4	0/1:255,0,255:1583:748:0:532,303,478,270	0/1:255,0,255:771:348:4:240,183,209,139
Locus_2_Transcript_9/4817_Confidence_1.000_Length_3488	2757	.	C	T	191	PASS	DP=1113;VDB=0.995904;SGB=-59.0363;RPB=0.999835;MQB=0.980899;MQSB=0.997563;BQB=0.331049;MQ0F=0;ICB=0.3;HOB=0.125;AC=1;AN=4;DP4=340,368,76,110;MQ=41	GT:PL:DP:DV:SP:DP4	0/0:0,255,255:536:3:9:275,258,0,3	0/1:255,0,255:358:183:3:65,110,76,107
Locus_2_Transcript_21/4817_Confidence_1.000_Length_1076	81	.	C	G	131	PASS	DP=210;VDB=5.53004e-05;SGB=29.6354;RPB=0.0585142;MQB=0.789532;BQB=0.898217;MQ0F=0;ICB=0.3;HOB=0.125;AC=1;AN=4;DP4=116,0,45,0;MQ=39	GT:PL:DP:DV:SP:DP4	0/0:0,255,255:86:0:0:86,0,0,0	0/1:195,0,152:75:45:0:30,0,45,0
Locus_2_Transcript_21/4817_Confidence_1.000_Length_1076	166	.	T	A	191	PASS	DP=301;VDB=0.180242;SGB=32.408;RPB=0.837223;MQB=0.943188;MQSB=0.18137;BQB=0.786086;MQ0F=0;ICB=0.3;HOB=0.125;AC=1;AN=4;DP4=128,26,33,16;MQ=41	GT:PL:DP:DV:SP:DP4	0/0:0,255,255:101:0:0:84,17,0,0	0/1:255,0,255:102:49:10:44,9,33,16
Locus_2_Transcript_21/4817_Confidence_1.000_Length_1076	382	.	T	A	191	PASS	DP=279;VDB=0.00143873;SGB=35.8738;RPB=0.5771;MQB=0.99801;MQSB=0.988565;BQB=0.741914;MQ0F=0;ICB=0.3;HOB=0.125;AC=1;AN=4;DP4=109,67,38,16;MQ=41	GT:PL:DP:DV:SP:DP4	0/0:0,255,255:109:0:0:68,41,0,0	0/1:255,0,255:121:54:5:41,26,38,16
Locus_2_Transcript_21/4817_Confidence_1.000_Length_1076	404	.	G	A	191	PASS	DP=329;VDB=0.689597;SGB=26.1697;RPB=0.815774;MQB=0.998892;MQSB=0.982711;BQB=0.938346;MQ0F=0;ICB=0.3;HOB=0.125;AC=1;AN=4;DP4=158,55,31,9;MQ=41	GT:PL:DP:DV:SP:DP4	0/1:255,0,255:118:40:7:51,27,31,9	0/0:0,255,255:135:0:0:107,28,0,0
Locus_2_Transcript_21/4817_Confidence_1.000_Length_1076	961	.	C	T	191	PASS	DP=189;VDB=0.00692544;SGB=19.2382;RPB=0.72624;MQB=0.658497;MQSB=0.129697;BQB=0.697937;MQ0F=0;ICB=0.3;HOB=0.125;AC=1;AN=4;DP4=51,59,9,21;MQ=40	GT:PL:DP:DV:SP:DP4	0/0:0,217,255:72:0:0:35,37,0,0	0/1:255,0,255:68:30:5:16,22,9,21
Locus_2_Transcript_23/4817_Confidence_1.000_Length_267	94	.	T	A	109	PASS	DP=99;VDB=0.0211831;SGB=6.76576;RPB=0.972468;MQB=0.951579;BQB=0.366024;MQ0F=0;ICB=0.3;HOB=0.125;AC=1;AN=4;DP4=51,0,12,0;MQ=41	GT:PL:DP:DV:SP:DP4	0/0:0,108,232:36:0:0:36,0,0,0	0/1:173,0,175:27:12:0:15,0,12,0
Locus_2_Transcript_23/4817_Confidence_1.000_Length_267	165	.	C	T	191	PASS	DP=142;VDB=0.706406;SGB=12.3071;RPB=0.0105226;MQB=0.303574;MQSB=0.203369;BQB=0.516217;MQ0F=0;ICB=0.3;HOB=0.125;AC=1;AN=4;DP4=49,13,12,8;MQ=38	GT:PL:DP:DV:SP:DP4	0/1:255,0,255:50:20:3:21,9,12,8	0/0:0,96,255:32:0:0:28,4,0,0
Locus_2_Transcript_24/4817_Confidence_1.000_Length_1262	125	.	T	C	191	PASS	DP=869;VDB=0.114307;SGB=119.051;RPB=0.801354;MQB=0.335186;MQSB=2.57955e-35;BQB=0.261009;MQ0F=0;ICB=0.3;HOB=0.125;AC=1;AN=4;DP4=366,92,131,43;MQ=40	GT:PL:DP:DV:SP:DP4	0/0:0,255,255:293:0:0:239,54,0,0	0/1:255,0,255:339:174:1:127,38,131,43
Locus_2_Transcript_24/4817_Confidence_1.000_Length_1262	448	.	C	T	191	PASS	DP=1106;VDB=0.994187;SGB=148.857;RPB=0.513066;MQB=0.987361;MQSB=0.892531;BQB=0.4614;MQ0F=0;ICB=0.3;HOB=0.125;AC=1;AN=4;DP4=400,226,126,91;MQ=41	GT:PL:DP:DV:SP:DP4	0/0:0,255,255:422:0:0:285,137,0,0	0/1:255,0,255:421:217:1:115,89,126,91
Locus_2_Transcript_24/4817_Confidence_1.000_Length_1262	473	.	G	A	191	PASS	DP=1024;VDB=0.994204;SGB=139.153;RPB=0.749581;MQB=0.999712;MQSB=0.984038;BQB=0.516701;MQ0F=0;ICB=0.3;HOB=0.125;AC=1;AN=4;DP4=329,310,92,111;MQ=41	GT:PL:DP:DV:SP:DP4	0/0:0,255,255:417:0:0:224,193,0,0	0/1:255,0,255:425:203:2:105,117,92,111
Locus_2_Transcript_24/4817_Confidence_1.000_Length_1262	765	.	A	G	191	PASS	DP=816;VDB=0.997038;SGB=98.9501;RPB=0.634532;MQB=0.995325;MQSB=0.841895;BQB=0.841703;MQ0F=0;ICB=0.3;HOB=0.125;AC=1;AN=4;DP4=344,142,102,43;MQ=41	GT:PL:DP:DV:SP:DP4	0/0:0,255,255:328:0:0:233,95,0,0	0/1:255,0,255:303:145:0:111,47,102,43
Locus_2_Transcript_24/4817_Confidence_1.000_Length_1262	788	.	C	T	191	PASS	DP=834;VDB=0.725457;SGB=-52.2855;RPB=0.863778;MQB=0.979285;MQSB=0.966974;BQB=0.341869;MQ0F=0;ICB=0.3;HOB=0.125;AC=1;AN=4;DP4=328,143,105,59;MQ=41	GT:PL:DP:DV:SP:DP4	0/0:0,255,255:321:1:0:221,99,0,1	0/1:255,0,255:314:163:6:107,44,105,58
Locus_2_Transcript_24/4817_Confidence_1.000_Length_1262	802	.	T	C	446	PASS	DP=855;VDB=0.476769;SGB=-144.648;RPB=0.97168;MQB=0.96413;MQSB=0.984286;BQB=0.850263;MQ0F=0;ICB=0.3;HOB=0.125;AC=3;AN=4;DP4=119,70,299,166;MQ=41	GT:PL:DP:DV:SP:DP4	0/1:255,0,255:338:152:5:116,70,103,49	1/1:255,255,0:316:313:5:3,0,196,117
Locus_2_Transcript_24/4817_Confidence_1.000_Length_1262	1002	.	G	C	447	PASS	DP=713;VDB=0.674614;SGB=-79.5954;RPB=0.969689;MQB=0.978143;MQSB=0.692168;BQB=0.238663;MQ0F=0.00140252;ICB=0.5;HOB=0.5;AC=2;AN=4;DP4=175,90,178,75;MQ=41	GT:PL:DP:DV:SP:DP4	0/1:255,0,255:263:118:6:100,45,89,29	0/1:255,0,255:255:135:2:75,45,89,46
Locus_2_Transcript_25/4817_Confidence_1.000_Length_756	142	.	T	C	191	PASS	DP=1540;VDB=0.997245;SGB=173.81;RPB=0.388721;MQB=0.886371;MQSB=3.22989e-25;BQB=0.932224;MQ0F=0;ICB=0.3;HOB=0.125;AC=1;AN=4;DP4=742,153,227,26;MQ=40	GT:PL:DP:DV:SP:DP4	0/0:0,255,255:617:0:0:524,93,0,0	0/1:255,0,255:531:253:34:218,60,227,26
Locus_2_Transcript_25/4817_Confidence_1.000_Length_756	169	.	A	G	447	PASS	DP=1811;VDB=0.98649;SGB=-192.824;RPB=0.912725;MQB=0.999586;MQSB=2.10604e-07;BQB=0.62322;MQ0F=0;ICB=0.5;HOB=0.5;AC=2;AN=4;DP4=534,141,514,108;MQ=41	GT:PL:DP:DV:SP:DP4	0/1:255,0,255:659:322:12:266,71,272,50	0/1:255,0,255:638:300:2:268,70,242,58
Locus_2_Transcript_25/4817_Confidence_1.000_Length_756	322	.	C	T	191	PASS	DP=1796;VDB=0.951114;SGB=-117.338;RPB=0.991233;MQB=0.999847;MQSB=0.999534;BQB=4.42822e-05;MQ0F=0;ICB=0.3;HOB=0.125;AC=1;AN=4;DP4=613,424,268,108;MQ=41	GT:PL:DP:DV:SP:DP4	0/1:255,0,255:716:375:28:204,137,267,108	0/0:0,255,255:697:1:0:409,287,1,0
Locus_2_Transcript_25/4817_Confidence_1.000_Length_756	474	.	G	T	191	PASS	DP=2012;VDB=0.813625;SGB=-112.736;RPB=0.143809;MQB=0.707492;MQSB=0.986518;BQB=0.0707087;MQ0F=0;ICB=0.3;HOB=0.125;AC=1;AN=4;DP4=618,549,195,166;MQ=41	GT:PL:DP:DV:SP:DP4	0/0:0,255,255:836:1:0:463,372,0,1	0/1:255,0,255:692:360:12:155,177,195,165
Locus_2_Transcript_25/4817_Confidence_1.000_Length_756	559	.	T	C	447	PASS	DP=1951;VDB=0.195295;SGB=-198.961;RPB=0.160786;MQB=0.98498;MQSB=0.853772;BQB=0.247846;MQ0F=0;ICB=0.5;HOB=0.5;AC=2;AN=4;DP4=537,208,496,146;MQ=41	GT:PL:DP:DV:SP:DP4	0/1:255,0,255:720:339:19:265,116,264,75	0/1:255,0,255:667:303:2:272,92,232,71
Locus_2_Transcript_25/4817_Confidence_1.000_Length_756	745	.	T	C	409	PASS	DP=277;VDB=0;SGB=-34.1812;RPB=0.898292;MQB=0.0424802;MQSB=2.99814e-06;BQB=0.17908;MQ0F=0;ICB=0.5;HOB=0.5;AC=2;AN=4;DP4=12,110,18,87;MQ=36	GT:PL:DP:DV:SP:DP4	0/1:218,0,255:92:37:10:4,51,7,30	0/1:255,0,255:135:68:2:8,59,11,57
Locus_2_Transcript_25/4817_Confidence_1.000_Length_756	748	.	C	T	421	PASS	DP=239;VDB=0;SGB=-33.8744;RPB=0.257456;MQB=0.253566;MQSB=2.69577e-06;BQB=0.617047;MQ0F=0;ICB=0.5;HOB=0.5;AC=2;AN=4;DP4=9,95,18,86;MQ=36	GT:PL:DP:DV:SP:DP4	0/1:229,0,211:82:36:14:2,44,7,29	0/1:255,0,255:126:68:2:7,51,11,57
Locus_2_Transcript_26/4817_Confidence_1.000_Length_346	49	.	T	C	294	PASS	DP=549;VDB=2.74598e-41;SGB=-63.3322;RPB=0.914522;MQB=9.32458e-08;BQB=0.215011;MQ0F=0.010929;ICB=0.5;HOB=0.5;AC=2;AN=4;DP4=250,0,200,0;MQ=37	GT:PL:DP:DV:SP:DP4	0/1:176,0,222:204:86:0:118,0,86,0	0/1:182,0,238:246:114:0:132,0,114,0
Locus_2_Transcript_26/4817_Confidence_1.000_Length_346	52	.	C	T	300	PASS	DP=563;VDB=5.61038e-41;SGB=-63.6391;RPB=0.95193;MQB=4.80549e-08;BQB=0.547673;MQ0F=0.0106572;ICB=0.5;HOB=0.5;AC=2;AN=4;DP4=249,0,201,0;MQ=37	GT:PL:DP:DV:SP:DP4	0/1:180,0,223:204:87:0:117,0,87,0	0/1:184,0,239:246:114:0:132,0,114,0
Locus_2_Transcript_26/4817_Confidence_1.000_Length_346	132	.	A	G	191	PASS	DP=1543;VDB=0.809206;SGB=163.413;RPB=0.540358;MQB=1.70844e-11;MQSB=7.58424e-31;BQB=0.165602;MQ0F=0;ICB=0.3;HOB=0.125;AC=1;AN=4;DP4=652,109,206,32;MQ=40	GT:PL:DP:DV:SP:DP4	0/0:0,255,255:482:0:0:420,62,0,0	0/1:255,0,255:517:238:5:232,47,206,32
Locus_2_Transcript_26/4817_Confidence_1.000_Length_346	263	.	C	T	191	PASS	DP=814;VDB=4.2832e-09;SGB=95.4844;RPB=0.991583;MQB=0.70692;MQSB=0.272677;BQB=0.166284;MQ0F=0.00737101;ICB=0.3;HOB=0.125;AC=1;AN=4;DP4=166,265,71,69;MQ=40	GT:PL:DP:DV:SP:DP4	0/1:255,0,255:275:140:5:60,75,71,69	0/0:0,255,255:296:0:0:106,190,0,0
Locus_2_Transcript_27/4817_Confidence_1.000_Length_1392	35	.	G	A	260	PASS	DP=214;VDB=4.61827e-19;SGB=-25.8962;RPB=0.733742;MQB=0.876507;BQB=0.978601;MQ0F=0.0186916;ICB=0.5;HOB=0.5;AC=2;AN=4;DP4=101,0,78,0;MQ=34	GT:PL:DP:DV:SP:DP4	0/1:174,0,179:86:42:0:44,0,42,0	0/1:149,0,166:93:36:0:57,0,36,0
Locus_2_Transcript_27/4817_Confidence_1.000_Length_1392	46	.	T	G	369	PASS	DP=263;VDB=6.67956e-22;SGB=-1.38396;RPB=0.442993;MQB=0.207283;BQB=0.640652;MQ0F=0.0152091;ICB=0.3;HOB=0.125;AC=3;AN=4;DP4=53,0,166,0;MQ=35	GT:PL:DP:DV:SP:DP4	0/1:181,0,186:107:54:0:53,0,54,0	1/1:252,255,0:112:112:0:0,0,112,0
Locus_2_Transcript_27/4817_Confidence_1.000_Length_1392	61	.	C	G	456	PASS	DP=311;VDB=1.53373e-25;SGB=-1.38629;MQ0F=0.0128617;AC=4;AN=4;DP4=0,0,224,0;MQ=36	GT:PL:DP:DV:SP:DP4	1/1:255,255,0:108:108:0:0,0,108,0	1/1:255,255,0:116:116:0:0,0,116,0
Locus_2_Transcript_27/4817_Confidence_1.000_Length_1392	442	.	C	T	191	PASS	DP=569;VDB=0.772231;SGB=92.0187;RPB=0.88631;MQB=0.989461;MQSB=0.996153;BQB=0.945957;MQ0F=0;ICB=0.3;HOB=0.125;AC=1;AN=4;DP4=203,120,86,49;MQ=41	GT:PL:DP:DV:SP:DP4	0/0:0,255,255:146:0:0:92,54,0,0	0/1:255,0,255:312:135:0:111,66,86,49
Locus_2_Transcript_27/4817_Confidence_1.000_Length_1392	576	.	A	T	191	PASS	DP=525;VDB=0.716476;SGB=81.6215;RPB=0.597796;MQB=0.977878;MQSB=0.968444;BQB=0.271912;MQ0F=0;ICB=0.3;HOB=0.125;AC=1;AN=4;DP4=147,149,62,58;MQ=41	GT:PL:DP:DV:SP:DP4	0/0:0,255,255:159:0:0:92,67,0,0	0/1:255,0,255:257:120:11:55,82,62,58
Locus_2_Transcript_27/4817_Confidence_1.000_Length_1392	597	.	A	G	191	PASS	DP=464;VDB=0.0231767;SGB=68.4517;RPB=0.869091;MQB=0.972233;MQSB=0.953862;BQB=0.838757;MQ0F=0;ICB=0.3;HOB=0.125;AC=1;AN=4;DP4=116,153,45,56;MQ=41	GT:PL:DP:DV:SP:DP4	0/0:0,255,255:154:0:0:74,80,0,0	0/1:255,0,255:216:101:6:42,73,45,56
Locus_2_Transcript_27/4817_Confidence_1.000_Length_1392	659	.	C	G	447	PASS	DP=434;VDB=0.900573;SGB=-56.5815;RPB=0.306096;MQB=0.942992;MQSB=0.99979;BQB=0.998387;MQ0F=0;ICB=0.5;HOB=0.5;AC=2;AN=4;DP4=103,55,126,52;MQ=41	GT:PL:DP:DV:SP:DP4	0/1:255,0,255:153:82:0:49,22,56,26	0/1:255,0,255:183:96:8:54,33,70,26
Locus_2_Transcript_27/4817_Confidence_1.000_Length_1392	715	.	T	C	447	PASS	DP=401;VDB=0.855228;SGB=-49.5238;RPB=0.495786;MQB=0.959721;MQSB=0.965981;BQB=0.981894;MQ0F=0;ICB=0.5;HOB=0.5;AC=2;AN=4;DP4=107,40,129,26;MQ=41	GT:PL:DP:DV:SP:DP4	0/1:255,0,255:127:62:10:50,15,55,7	0/1:255,0,255:175:93:8:57,25,74,19
Locus_2_Transcript_27/4817_Confidence_1.000_Length_1392	756	.	G	A	191	PASS	DP=412;VDB=0.00025467;SGB=-29.8853;RPB=0.603302;MQB=0.862987;MQSB=0.991007;BQB=0.512575;MQ0F=0;ICB=0.3;HOB=0.125;AC=1;AN=4;DP4=152,59,52,39;MQ=41	GT:PL:DP:DV:SP:DP4	0/0:0,255,255:129:1:0:95,33,0,1	0/1:255,0,255:173:90:8:57,26,52,38
Locus_2_Transcript_27/4817_Confidence_1.000_Length_1392	876	.	G	T	191	PASS	DP=352;VDB=0.956968;SGB=-16.3837;RPB=0.964579;MQB=0.990356;MQSB=0.985444;BQB=0.798199;MQ0F=0;ICB=0.3;HOB=0.125;AC=1;AN=4;DP4=138,95,31,16;MQ=41	GT:PL:DP:DV:SP:DP4	0/1:255,0,255:108:46:6:34,28,31,15	0/0:0,255,255:172:1:0:104,67,0,1
Locus_2_Transcript_27/4817_Confidence_1.000_Length_1392	1045	.	A	G	447	PASS	DP=320;VDB=0.00834292;SGB=-37.5566;RPB=0.29189;MQB=0.99244;MQSB=0.874437;BQB=0.704618;MQ0F=0;ICB=0.5;HOB=0.5;AC=2;AN=4;DP4=61,60,67,49;MQ=41	GT:PL:DP:DV:SP:DP4	0/1:255,0,255:105:51:4:29,25,32,19	0/1:255,0,255:132:65:3:32,35,35,30
Locus_2_Transcript_27/4817_Confidence_1.000_Length_1392	1094	.	G	A	191	PASS	DP=244;VDB=0.000725617;SGB=-16.3837;RPB=0.779025;MQB=0.898904;MQSB=0.982642;BQB=0.976497;MQ0F=0;ICB=0.3;HOB=0.125;AC=1;AN=4;DP4=58,98,19,28;MQ=41	GT:PL:DP:DV:SP:DP4	0/1:255,0,255:86:46:1:17,23,18,28	0/0:0,255,255:117:1:0:41,75,1,0
Locus_2_Transcript_30/4817_Confidence_1.000_Length_306	24	.	C	G	179	PASS	DP=28;VDB=0.000479698;SGB=-5.95064;RPB=0.685489;MQB=0.728107;BQB=0.909914;MQ0F=0.0714286;ICB=0.3;HOB=0.125;AC=3;AN=4;DP4=8,0,13,0;MQ=38	GT:PL:DP:DV:SP:DP4	1/1:129,15,0:5:5:0:0,0,5,0	0/1:114,0,141:16:8:0:8,0,8,0
Locus_2_Transcript_30/4817_Confidence_1.000_Length_306	170	.	A	G	446	PASS	DP=197;VDB=0.305021;SGB=-25.5893;RPB=0.664167;MQB=0.00887141;MQSB=0.108892;BQB=0.92339;MQ0F=0;ICB=0.5;HOB=0.5;AC=2;AN=4;DP4=43,12,54,23;MQ=38	GT:PL:DP:DV:SP:DP4	0/1:255,0,189:48:28:4:19,1,24,4	0/1:255,0,255:84:49:2:24,11,30,19
Locus_2_Transcript_30/4817_Confidence_1.000_Length_306	174	.	C	T	436	PASS	DP=203;VDB=0.354728;SGB=-22.2139;RPB=0.235378;MQB=7.58174e-05;MQSB=0.144336;BQB=0.314097;MQ0F=0;ICB=0.5;HOB=0.5;AC=2;AN=4;DP4=53,10,43,23;MQ=38	GT:PL:DP:DV:SP:DP4	0/1:244,0,211:48:18:12:29,1,14,4	0/1:255,0,255:81:48:5:24,9,29,19
Locus_2_Transcript_30/4817_Confidence_1.000_Length_306	285	.	C	G	99	PASS	DP=48;VDB=1.20825e-05;SGB=-5.3363;RPB=0.387043;MQB=0.0891226;MQSB=0.121951;BQB=0.899903;MQ0F=0;ICB=0.5;HOB=0.5;AC=2;AN=4;DP4=1,31,1,10;MQ=38	GT:PL:DP:DV:SP:DP4	0/1:43,0,158:18:3:0:0,15,0,3	0/1:122,0,178:25:8:0:1,16,1,7
Locus_2_Transcript_33/4817_Confidence_1.000_Length_269	161	.	G	A	90	PASS	DP=179;VDB=0.547011;SGB=-7.48501;RPB=0.886285;MQB=0.282205;MQSB=0.969632;BQB=0.9937;MQ0F=0;ICB=0.5;HOB=0.5;AC=2;AN=4;DP4=61,28,14,4;MQ=37	GT:PL:DP:DV:SP:DP4	0/1:107,0,255:59:10:1:34,15,6,4	0/1:52,0,255:48:8:11:27,13,8,0
Locus_2_Transcript_33/4817_Confidence_1.000_Length_269	180	.	A	G	193	PASS	DP=146;VDB=0.262812;SGB=-8.09871;RPB=0.842908;MQB=0.593971;MQSB=0.364682;BQB=0.923948;MQ0F=0;ICB=0.5;HOB=0.5;AC=2;AN=4;DP4=41,30,14,6;MQ=36	GT:PL:DP:DV:SP:DP4	0/1:178,0,255:45:12:0:20,13,8,4	0/1:82,0,255:46:8:4:21,17,6,2
Locus_2_Transcript_34/4817_Confidence_1.000_Length_206	72	.	C	G	101	PASS	DP=62;VDB=0.00797016;SGB=-6.25646;RPB=0.146607;MQB=0.273758;BQB=0.702821;MQ0F=0.0645161;ICB=0.5;HOB=0.5;AC=2;AN=4;DP4=20,0,14,0;MQ=35	GT:PL:DP:DV:SP:DP4	0/1:150,0,177:27:13:0:14,0,13,0	0/1:16,0,136:7:1:0:6,0,1,0
Locus_2_Transcript_34/4817_Confidence_1.000_Length_206	138	.	A	G	196	PASS	DP=56;VDB=0.0281545;SGB=-5.64373;RPB=0.449244;MQB=0.134085;MQSB=0.00643244;BQB=0.80337;MQ0F=0;ICB=0.5;HOB=0.5;AC=2;AN=4;DP4=16,4,8,4;MQ=37	GT:PL:DP:DV:SP:DP4	0/1:119,0,255:25:7:0:14,4,5,2	0/1:140,0,57:7:5:0:2,0,3,2
Locus_2_Transcript_35/4817_Confidence_1.000_Length_1463	348	.	T	A,C	108	PASS	DP=38;VDB=0.36862;SGB=-5.64361;RPB=0.888366;MQB=1;MQSB=1;BQB=0.91987;MQ0F=0;ICB=0.5;HOB=0.5;AC=1,1;AN=4;DP4=8,12,6,6;MQ=42	GT:PL:DP:DV:SP:DP4	0/1:98,0,137,113,149,241:9:4:0:2,3,1,3	0/2:137,183,255,0,255,255:23:8:4:6,9,5,3
Locus_2_Transcript_35/4817_Confidence_1.000_Length_1463	632	.	A	G	204	PASS	DP=21;VDB=0.124732;SGB=-5.33677;RPB=0.27354;MQB=0.946915;MQSB=0.934728;BQB=0.164736;MQ0F=0;ICB=0.3;HOB=0.125;AC=3;AN=4;DP4=3,5,6,5;MQ=41	GT:PL:DP:DV:SP:DP4	1/1:162,18,0:6:6:0:0,0,3,3	0/1:106,0,200:13:5:2:3,5,3,2
Locus_2_Transcript_35/4817_Confidence_1.000_Length_1463	677	.	G	C	254	PASS	DP=33;VDB=0.0110043;SGB=-7.17815;RPB=0.0274692;MQB=0.967085;MQSB=0.878701;BQB=0.931639;MQ0F=0;ICB=0.5;HOB=0.5;AC=2;AN=4;DP4=5,6,15,2;MQ=41	GT:PL:DP:DV:SP:DP4	0/1:143,0,69:11:8:13:1,2,8,0	0/1:175,0,195:17:9:5:4,4,7,2
Locus_2_Transcript_35/4817_Confidence_1.000_Length_1463	729	.	C	G	142	PASS	DP=32;VDB=0.0140615;SGB=4.00342;RPB=0.85801;MQB=0.884621;MQSB=0.884621;BQB=0.423576;MQ0F=0;ICB=0.3;HOB=0.125;AC=1;AN=4;DP4=12,5,5,3;MQ=41	GT:PL:DP:DV:SP:DP4	0/0:0,33,209:11:0:0:10,1,0,0	0/1:206,0,154:14:8:2:2,4,5,3
Locus_2_Transcript_35/4817_Confidence_1.000_Length_1463	765	.	C	T	154	PASS	DP=27;VDB=0.284215;SGB=-5.33664;RPB=0.0681997;MQB=0.950498;MQSB=0.970446;BQB=0.800949;MQ0F=0;ICB=0.5;HOB=0.5;AC=2;AN=4;DP4=8,5,8,3;MQ=41	GT:PL:DP:DV:SP:DP4	0/1:125,0,67:10:7:0:2,1,7,0	0/1:92,0,229:14:4:3:6,4,1,3
Locus_2_Transcript_37/4817_Confidence_1.000_Length_239	105	.	G	A	68	PASS	DP=113;VDB=1.51023e-06;SGB=-12.0878;RPB=0.00125505;MQB=1.43055e-08;MQSB=1;BQB=0.609232;MQ0F=0.00884956;ICB=0.5;HOB=0.5;AC=2;AN=4;DP4=27,0,32,1;MQ=26	GT:PL:DP:DV:SP:DP4	0/1:124,0,174:48:29:0:19,0,28,1	0/1:9,0,158:12:4:0:8,0,4,0
Locus_2_Transcript_37/4817_Confidence_1.000_Length_239	129	.	T	C	149	PASS	DP=95;VDB=4.18982e-07;SGB=-10.5535;RPB=6.10691e-05;MQB=1.31747e-06;MQSB=0.217149;BQB=0.0632849;MQ0F=0;ICB=0.5;HOB=0.5;AC=2;AN=4;DP4=21,3,20,8;MQ=29	GT:PL:DP:DV:SP:DP4	0/1:189,0,229:41:25:4:14,2,18,7	0/1:25,0,183:11:3:3:7,1,2,1
Locus_2_Transcript_37/4817_Confidence_1.000_Length_239	142	.	T	G	179	PASS	DP=81;VDB=9.00145e-10;SGB=-8.71241;RPB=0.082339;MQB=0.00894134;MQSB=0.0786475;BQB=0.152346;MQ0F=0;ICB=0.5;HOB=0.5;AC=2;AN=4;DP4=19,10,8,14;MQ=30	GT:PL:DP:DV:SP:DP4	0/1:203,0,255:40:18:7:14,8,7,11	0/1:41,0,190:11:4:6:5,2,1,3
Locus_2_Transcript_42/4817_Confidence_1.000_Length_534	234	.	A	G	101	PASS	DP=40;VDB=0.000418331;SGB=-1.35517;RPB=0.00182388;MQB=0.0451948;MQSB=0.998141;BQB=0.537244;MQ0F=0.075;ICB=0.5;HOB=0.5;AC=2;AN=4;DP4=3,3,23,1;MQ=23	GT:PL:DP:DV:SP:DP4	0/1:116,0,6:13:11:19:0,2,11,0	0/1:49,0,75:17:13:4:3,1,12,1
Locus_2_Transcript_42/4817_Confidence_1.000_Length_534	248	.	C	A	289	PASS	DP=42;VDB=0.00808498;SGB=-1.32177;MQSB=0.87037;MQ0F=0.0714286;AC=4;AN=4;DP4=0,0,27,2;MQ=24	GT:PL:DP:DV:SP:DP4	1/1:143,33,0:11:11:0:0,0,11,0	1/1:200,54,0:18:18:0:0,0,16,2
Locus_2_Transcript_43/4817_Confidence_1.000_Length_418	299	.	A	G	369	PASS	DP=63;VDB=1.75925e-05;SGB=-1.37893;RPB=0.3125;MQB=0.796875;MQSB=0.83166;BQB=0.75;MQ0F=0;AC=4;AN=4;DP4=2,0,29,3;MQ=35	GT:PL:DP:DV:SP:DP4	1/1:175,9,0:17:16:0:1,0,16,0	1/1:249,11,0:17:16:0:1,0,13,3
Locus_2_Transcript_43/4817_Confidence_1.000_Length_418	313	.	A	T	174	PASS	DP=64;VDB=0.00442571;SGB=-6.56443;RPB=0.65377;MQB=0.00710427;MQSB=0.951613;BQB=0.428674;MQ0F=0;ICB=0.5;HOB=0.5;AC=2;AN=4;DP4=18,0,13,2;MQ=35	GT:PL:DP:DV:SP:DP4	0/1:110,0,166:17:8:0:9,0,8,0	0/1:128,0,165:16:7:8:9,0,5,2
Locus_2_Transcript_44/4817_Confidence_1.000_Length_201	109	.	G	A	108	PASS	DP=399;VDB=1.89157e-25;SGB=-43.6936;RPB=0.155011;MQB=1.55068e-16;MQSB=0.773812;BQB=0.924955;MQ0F=0.142857;ICB=0.3;HOB=0.125;AC=3;AN=4;DP4=66,2,129,7;MQ=18	GT:PL:DP:DV:SP:DP4	0/1:66,0,181:182:114:0:66,2,110,4	1/1:106,66,0:22:22:0:0,0,19,3
Locus_2_Transcript_44/4817_Confidence_1.000_Length_201	135	.	A	G	208	PASS	DP=267;VDB=1.51471e-21;SGB=-38.1703;RPB=0.0595177;MQB=3.31831e-12;MQSB=0.977674;BQB=0.0212348;MQ0F=0.11236;ICB=0.3;HOB=0.125;AC=3;AN=4;DP4=23,45,49,69;MQ=19	GT:PL:DP:DV:SP:DP4	0/1:129,0,255:165:98:2:23,44,38,60	1/1:143,50,0:21:20:0:0,1,11,9
Locus_2_Transcript_45/4817_Confidence_1.000_Length_441	152	.	T	C	186	PASS	DP=193;VDB=0.132547;SGB=26.8628;RPB=0.613513;MQB=0.998853;MQSB=0.996725;BQB=0.980563;MQ0F=0;ICB=0.5;HOB=0.5;AC=2;AN=4;DP4=63,42,20,21;MQ=41	GT:PL:DP:DV:SP:DP4	0/0:0,255,255:105:0:0:63,42,0,0	1/1:255,123,0:41:41:0:0,0,20,21
Locus_2_Transcript_45/4817_Confidence_1.000_Length_441	249	.	C	T	174	PASS	DP=354;VDB=0.00494675;SGB=21.3177;RPB=0.906315;MQB=0.997417;MQSB=0.858028;BQB=0.937826;MQ0F=0;ICB=0.3;HOB=0.125;AC=1;AN=4;DP4=168,42,31,2;MQ=41	GT:PL:DP:DV:SP:DP4	0/0:0,255,255:166:0:0:128,38,0,0	0/1:238,0,255:77:33:2:40,4,31,2
Locus_2_Transcript_45/4817_Confidence_1.000_Length_441	272	.	T	G	191	PASS	DP=408;VDB=0.0575645;SGB=48.3504;RPB=0.299428;MQB=0.575172;MQSB=0.854532;BQB=0.956706;MQ0F=0;ICB=0.3;HOB=0.125;AC=1;AN=4;DP4=144,38,59,13;MQ=41	GT:PL:DP:DV:SP:DP4	0/1:255,0,255:169:72:8:69,28,59,13	0/0:0,255,255:85:0:0:75,10,0,0
Locus_2_Transcript_45/4817_Confidence_1.000_Length_441	343	.	G	T	191	PASS	DP=300;VDB=2.38596e-07;SGB=-24.9756;RPB=0.0365974;MQB=0.887399;MQSB=0.167389;BQB=0.223316;MQ0F=0;ICB=0.3;HOB=0.125;AC=1;AN=4;DP4=57,87,21,54;MQ=40	GT:PL:DP:DV:SP:DP4	0/1:255,0,255:137:74:17:30,33,20,54	0/0:0,244,255:82:1:0:27,54,1,0
Locus_2_Transcript_48/4817_Confidence_1.000_Length_353	306	.	C	T	137	PASS	DP=160;VDB=0.00290196;SGB=8.84268;RPB=0.99994;MQB=0.609744;MQSB=0.986213;BQB=0.961408;MQ0F=0;ICB=0.3;HOB=0.125;AC=1;AN=4;DP4=29,86,2,13;MQ=39	GT:PL:DP:DV:SP:DP4	0/0:0,255,255:100:0:0:26,74,0,0	0/1:201,0,230:30:15:0:3,12,2,13
Locus_2_Transcript_48/4817_Confidence_1.000_Length_353	336	.	G	A	71	PASS	DP=78;VDB=0.000764841;SGB=3.31571;RPB=0.277218;MQB=0.407709;MQSB=0.957469;BQB=0.68422;MQ0F=0;ICB=0.3;HOB=0.125;AC=1;AN=4;DP4=4,62,1,6;MQ=37	GT:PL:DP:DV:SP:DP4	0/0:0,172,255:57:0:0:4,53,0,0	0/1:135,0,136:16:7:0:0,9,1,6
Locus_2_Transcript_52/4817_Confidence_1.000_Length_366	319	.	G	A	82	PASS	DP=12;VDB=0.0872424;SGB=-4.10598;RPB=0.442128;MQB=0.924449;MQSB=1;BQB=0.964642;MQ0F=0.166667;ICB=0.3;HOB=0.125;AC=3;AN=4;DP4=0,4,1,6;MQ=34	GT:PL:DP:DV:SP:DP4	0/1:74,0,96:7:3:0:0,4,0,3	1/1:72,12,0:4:4:0:0,0,1,3
Locus_2_Transcript_53/4817_Confidence_1.000_Length_229	147	.	G	T	70	PASS	DP=19;VDB=0.0602347;SGB=1.94933;RPB=0.851779;MQB=0.140122;MQSB=0.832553;BQB=0.943882;MQ0F=0;ICB=0.3;HOB=0.125;AC=1;AN=4;DP4=2,9,1,4;MQ=36	GT:PL:DP:DV:SP:DP4	0/1:134,0,71:8:5:0:0,3,1,4	0/0:0,24,185:8:0:0:2,6,0,0
Locus_2_Transcript_54/4817_Confidence_1.000_Length_300	83	.	C	T	188	PASS	DP=49;VDB=0.0600954;SGB=-6.25755;RPB=0.247299;MQB=0.937241;BQB=0.71275;MQ0F=0;ICB=0.5;HOB=0.5;AC=2;AN=4;DP4=12,0,14,0;MQ=35	GT:PL:DP:DV:SP:DP4	0/1:118,0,159:14:6:0:8,0,6,0	0/1:134,0,53:12:8:0:4,0,8,0
Locus_2_Transcript_54/4817_Confidence_1.000_Length_300	145	.	C	T	286	PASS	DP=42;VDB=0.000145084;SGB=-6.87128;RPB=0.449329;MQB=0.419767;MQSB=0.495508;BQB=0.987578;MQ0F=0;ICB=0.5;HOB=0.5;AC=2;AN=4;DP4=9,1,10,6;MQ=37	GT:PL:DP:DV:SP:DP4	0/1:232,0,105:15:10:10:5,0,5,5	0/1:118,0,139:11:6:0:4,1,5,1
Locus_2_Transcript_55/4817_Confidence_1.000_Length_802	582	.	T	C	92	PASS	DP=26;VDB=0.00231828;SGB=1.94933;RPB=0.43471;MQB=0.878264;MQSB=0.397295;BQB=1;MQ0F=0.115385;ICB=0.5;HOB=0.5;AC=2;AN=4;DP4=7,13,2,3;MQ=36	GT:PL:DP:DV:SP:DP4	0/0:0,60,255:20:0:0:7,13,0,0	1/1:161,15,0:5:5:0:0,0,2,3
Locus_2_Transcript_56/4817_Confidence_1.000_Length_270	87	.	G	A	210	PASS	DP=502;VDB=5.70539e-12;SGB=-1.38629;RPB=0.308922;MQB=0.00689491;BQB=0.550395;MQ0F=0.0318725;ICB=0.5;HOB=0.5;AC=2;AN=4;DP4=66,0,226,0;MQ=32	GT:PL:DP:DV:SP:DP4	0/1:145,0,62:155:118:0:37,0,118,0	0/1:132,0,39:137:108:0:29,0,108,0
Locus_2_Transcript_56/4817_Confidence_1.000_Length_270	216	.	T	C	456	PASS	DP=246;VDB=3.75193e-23;SGB=-1.38629;RPB=1;MQB=1;MQSB=0.0235191;BQB=1;MQ0F=0.0162602;AC=4;AN=4;DP4=0,1,74,97;MQ=28	GT:PL:DP:DV:SP:DP4	1/1:255,250,0:83:83:0:0,0,38,45	1/1:255,231,0:89:88:0:0,1,36,52
Locus_2_Transcript_57/4817_Confidence_1.000_Length_363	182	.	A	G	446	PASS	DP=1107;VDB=0.805845;SGB=-88.1873;RPB=0.319987;MQB=0.00133477;MQSB=0.0131333;BQB=0.899422;MQ0F=0;ICB=0.5;HOB=0.5;AC=2;AN=4;DP4=289,184,173,108;MQ=39	GT:PL:DP:DV:SP:DP4	0/1:255,0,255:420:138:0:182,100,90,48	0/1:255,0,255:334:143:1:107,84,83,60
Locus_2_Transcript_57/4817_Confidence_1.000_Length_363	195	.	C	T	445	PASS	DP=1009;VDB=0.177012;SGB=-1.38629;RPB=0.651458;MQB=0.801486;MQSB=0.239544;BQB=0.483988;MQ0F=0;ICB=0.3;HOB=0.125;AC=3;AN=4;DP4=43,53,330,295;MQ=39	GT:PL:DP:DV:SP:DP4	1/1:255,233,0:398:359:6:17,22,193,166	0/1:255,0,20:323:266:3:26,31,137,129
Locus_2_Transcript_57/4817_Confidence_1.000_Length_363	214	.	C	T	267	PASS	DP=795;VDB=0.0153289;SGB=-47.3759;RPB=0.881491;MQB=9.72263e-06;MQSB=0.974078;BQB=0.169247;MQ0F=0;ICB=0.5;HOB=0.5;AC=2;AN=4;DP4=260,173,88,60;MQ=39	GT:PL:DP:DV:SP:DP4	0/1:78,0,255:323:63:3:161,99,42,21	0/1:255,0,255:258:85:2:99,74,46,39
Locus_2_Transcript_57/4817_Confidence_1.000_Length_363	334	.	A	G	433	PASS	DP=229;VDB=4.19409e-42;SGB=-41.8525;RPB=0.65432;MQB=0.687111;MQSB=6.60085e-05;BQB=0.291566;MQ0F=0.00436681;ICB=0.5;HOB=0.5;AC=2;AN=4;DP4=12,42,20,110;MQ=35	GT:PL:DP:DV:SP:DP4	0/1:255,0,224:102:67:3:10,25,14,53	0/1:243,0,74:82:63:0:2,17,6,57
Locus_2_Transcript_57/4817_Confidence_1.000_Length_363	344	.	A	G	194	PASS	DP=161;VDB=2.8026e-45;SGB=-1.38629;RPB=0.64295;MQB=0.73919;MQSB=0.0198594;BQB=0.155743;MQ0F=0.00621118;ICB=0.5;HOB=0.5;AC=2;AN=4;DP4=1,30,3,116;MQ=33	GT:PL:DP:DV:SP:DP4	0/1:134,0,47:82:66:0:0,16,3,63	0/1:127,0,66:68:53:0:1,14,0,53
Locus_2_Transcript_57/4817_Confidence_1.000_Length_363	349	.	C	A	238	PASS	DP=105;VDB=3.93552e-28;SGB=-19.1454;RPB=0.985498;MQB=0.914189;MQSB=0.0531915;BQB=0.448095;MQ0F=0.00952381;ICB=0.5;HOB=0.5;AC=2;AN=4;DP4=1,39,1,55;MQ=29	GT:PL:DP:DV:SP:DP4	0/1:153,0,138:59:34:0:0,25,1,33	0/1:149,0,125:37:22:0:1,14,0,22
Locus_2_Transcript_58/4817_Confidence_1.000_Length_884	593	.	A	G	81	PASS	DP=197;VDB=0.886348;SGB=-8.40557;RPB=0.953878;MQB=0.949273;MQSB=0.999994;BQB=0.908569;MQ0F=0;ICB=0.5;HOB=0.5;AC=2;AN=4;DP4=66,71,12,9;MQ=41	GT:PL:DP:DV:SP:DP4	0/1:74,0,255:77:10:3:26,41,5,5	0/1:77,0,255:81:11:1:40,30,7,4
Locus_2_Transcript_59/4817_Confidence_1.000_Length_722	318	.	A	G	82	PASS	DP=175;VDB=0.950882;SGB=-6.25752;RPB=0.105616;MQB=0.988401;MQSB=0.956025;BQB=0.775634;MQ0F=0.00571429;ICB=0.3;HOB=0.125;AC=1;AN=4;DP4=79,41,9,5;MQ=41	GT:PL:DP:DV:SP:DP4	0/1:147,0,255:45:9:3:18,18,6,3	0/0:0,98,255:89:5:2:61,23,3,2
Locus_2_Transcript_60/4817_Confidence_1.000_Length_298	211	.	T	C	269	PASS	DP=78;VDB=0.0118894;SGB=-7.79186;RPB=0.693087;MQB=0.958082;MQSB=0.15987;BQB=0.948507;MQ0F=0;ICB=0.5;HOB=0.5;AC=2;AN=4;DP4=16,12,13,6;MQ=35	GT:PL:DP:DV:SP:DP4	0/1:156,0,112:12:7:0:4,1,6,1	0/1:176,0,255:35:12:0:12,11,7,5
Locus_2_Transcript_61/4817_Confidence_1.000_Length_357	154	.	A	G	455	PASS	DP=190;VDB=0.0269311;SGB=7.54226;RPB=0.743929;MQB=0.206739;MQSB=0.16557;BQB=0.567828;MQ0F=0.00526316;AC=4;AN=4;DP4=4,0,93,25;MQ=36	GT:PL:DP:DV:SP:DP4	1/1:255,57,0:19:19:0:0,0,17,2	1/1:255,193,0:103:99:2:4,0,76,23
Locus_2_Transcript_61/4817_Confidence_1.000_Length_357	172	.	A	G	349	PASS	DP=186;VDB=0.380858;SGB=-15.4632;RPB=0.974903;MQB=0.000444201;MQSB=0.0951055;BQB=0.953362;MQ0F=0.00537634;ICB=0.5;HOB=0.5;AC=2;AN=4;DP4=57,26,34,10;MQ=35	GT:PL:DP:DV:SP:DP4	0/1:222,0,148:20:11:0:5,4,6,5	0/1:191,0,255:107:33:8:52,22,28,5
Locus_2_Transcript_61/4817_Confidence_1.000_Length_357	175	.	G	A	290	PASS	DP=184;VDB=0.453495;SGB=-13.6221;RPB=0.966008;MQB=0.998834;MQSB=0.147209;BQB=0.173882;MQ0F=0.00543478;ICB=0.5;HOB=0.5;AC=2;AN=4;DP4=71,16,21,17;MQ=35	GT:PL:DP:DV:SP:DP4	0/1:100,0,255:20:7:2:8,5,3,4	0/1:255,0,255:105:31:23:63,11,18,13
Locus_2_Transcript_61/4817_Confidence_1.000_Length_357	271	.	G	T	221	PASS	DP=121;VDB=7.54383e-05;SGB=-19.1454;RPB=0.828104;MQB=0.461195;MQSB=0.86863;BQB=0.721246;MQ0F=0;ICB=0.5;HOB=0.5;AC=2;AN=4;DP4=10,14,27,29;MQ=34	GT:PL:DP:DV:SP:DP4	0/1:29,0,104:10:6:7:4,0,3,3	0/1:255,0,192:70:50:7:6,14,24,26
Locus_2_Transcript_61/4817_Confidence_1.000_Length_357	304	.	A	C	312	PASS	DP=78;VDB=0.000680691;SGB=-9.93983;RPB=0.671082;MQB=0.0106076;MQSB=0.160076;BQB=0.505564;MQ0F=0;ICB=0.3;HOB=0.125;AC=3;AN=4;DP4=8,25,11,15;MQ=34	GT:PL:DP:DV:SP:DP4	1/1:161,11,0:7:6:0:1,0,5,1	0/1:215,0,255:52:20:3:7,25,6,14
Locus_2_Transcript_61/4817_Confidence_1.000_Length_357	328	.	G	A	189	PASS	DP=39;VDB=9.81814e-07;SGB=-8.09867;RPB=0.540457;MQB=0.760724;MQSB=0.0344928;BQB=0.681457;MQ0F=0;ICB=0.3;HOB=0.125;AC=3;AN=4;DP4=2,10,3,17;MQ=30	GT:PL:DP:DV:SP:DP4	1/1:67,3,0:4:3:0:1,0,1,2	0/1:185,0,118:28:17:0:1,10,2,15
Locus_2_Transcript_62/4817_Confidence_1.000_Length_220	69	.	C	T	86	PASS	DP=78;VDB=0.00247971;SGB=10.9211;RPB=0.744972;MQB=0.57785;BQB=0.980779;MQ0F=0;ICB=0.3;HOB=0.125;AC=1;AN=4;DP4=31,0,18,0;MQ=32	GT:PL:DP:DV:SP:DP4	0/0:0,9,88:3:0:0:3,0,0,0	0/1:150,0,182:46:18:0:28,0,18,0
Locus_2_Transcript_62/4817_Confidence_1.000_Length_220	72	.	T	A	172	PASS	DP=85;VDB=0.00295901;SGB=-11.7809;RPB=0.780707;MQB=0.665067;BQB=0.0417327;MQ0F=0;ICB=0.5;HOB=0.5;AC=2;AN=4;DP4=17,0,32,0;MQ=32	GT:PL:DP:DV:SP:DP4	0/1:64,0,14:3:2:0:1,0,2,0	0/1:173,0,151:46:30:0:16,0,30,0
Locus_2_Transcript_62/4817_Confidence_1.000_Length_220	81	.	G	A	160	PASS	DP=96;VDB=0.00856217;SGB=-9.01924;RPB=0.834768;MQB=0.068771;BQB=0.943656;MQ0F=0;ICB=0.5;HOB=0.5;AC=2;AN=4;DP4=26,0,23,0;MQ=32	GT:PL:DP:DV:SP:DP4	0/1:64,0,14:3:2:0:1,0,2,0	0/1:160,0,186:46:21:0:25,0,21,0
Locus_2_Transcript_62/4817_Confidence_1.000_Length_220	108	.	A	C	124	PASS	DP=112;VDB=0.021209;SGB=-7.48484;RPB=0.871897;MQB=0.485743;MQSB=1;BQB=0.93995;MQ0F=0;ICB=0.5;HOB=0.5;AC=2;AN=4;DP4=38,1,18,0;MQ=32	GT:PL:DP:DV:SP:DP4	0/1:63,0,79:5:2:0:3,0,2,0	0/1:125,0,186:52:16:0:35,1,16,0
Locus_2_Transcript_63/4817_Confidence_1.000_Length_469	98	.	T	C	256	PASS	DP=103;VDB=0.0345447;SGB=-13.9289;RPB=0.975671;MQB=0.524058;BQB=0.845564;MQ0F=0;ICB=0.5;HOB=0.5;AC=2;AN=4;DP4=35,0,39,0;MQ=39	GT:PL:DP:DV:SP:DP4	0/1:134,0,175:22:8:0:14,0,8,0	0/1:185,0,157:52:31:0:21,0,31,0
Locus_2_Transcript_63/4817_Confidence_1.000_Length_469	246	.	T	C	319	PASS	DP=142;VDB=0.018641;SGB=-19.4523;RPB=0.96461;MQB=0.658266;MQSB=0.970633;BQB=0.883138;MQ0F=0.0140845;ICB=0.5;HOB=0.5;AC=2;AN=4;DP4=31,23,36,21;MQ=41	GT:PL:DP:DV:SP:DP4	0/1:128,0,255:26:8:4:10,8,6,2	0/1:255,0,255:85:49:1:21,15,30,19
Locus_2_Transcript_63/4817_Confidence_1.000_Length_469	278	.	T	A	187	PASS	DP=141;VDB=0.768123;SGB=-8.71237;RPB=0.668498;MQB=0.344425;MQSB=0.738748;BQB=0.998048;MQ0F=0;ICB=0.3;HOB=0.125;AC=1;AN=4;DP4=46,26,13,9;MQ=41	GT:PL:DP:DV:SP:DP4	0/0:0,35,255:25:2:9:16,7,0,2	0/1:252,0,255:69:20:0:30,19,13,7
Locus_2_Transcript_63/4817_Confidence_1.000_Length_469	337	.	G	A	103	PASS	DP=140;VDB=0.391945;SGB=4.69269;RPB=0.939474;MQB=0.806754;MQSB=0.071672;BQB=0.20995;MQ0F=0;ICB=0.3;HOB=0.125;AC=1;AN=4;DP4=52,33,4,5;MQ=40	GT:PL:DP:DV:SP:DP4	0/1:168,0,255:29:9:12:17,3,4,5	0/0:0,196,255:65:0:0:35,30,0,0
Locus_2_Transcript_64/4817_Confidence_1.000_Length_582	86	.	A	G	214	PASS	DP=108;VDB=0.0447986;SGB=-9.32613;RPB=0.447449;MQB=0.211973;BQB=0.999931;MQ0F=0;ICB=0.5;HOB=0.5;AC=2;AN=4;DP4=49,0,24,0;MQ=39	GT:PL:DP:DV:SP:DP4	0/1:137,0,154:18:8:0:10,0,8,0	0/1:141,0,182:55:16:0:39,0,16,0
Locus_2_Transcript_64/4817_Confidence_1.000_Length_582	179	.	C	T	309	PASS	DP=186;VDB=0.951058;SGB=-20.3728;RPB=0.084175;MQB=0.455471;MQSB=0.250482;BQB=0.83246;MQ0F=0;ICB=0.5;HOB=0.5;AC=2;AN=4;DP4=60,18,53,7;MQ=39	GT:PL:DP:DV:SP:DP4	0/1:118,0,243:42:11:0:29,2,10,1	0/1:255,0,255:96:49:18:31,16,43,6
Locus_2_Transcript_64/4817_Confidence_1.000_Length_582	194	.	A	G	337	PASS	DP=175;VDB=0.28457;SGB=-20.3728;RPB=0.170426;MQB=0.316853;MQSB=0.541323;BQB=0.758777;MQ0F=0;ICB=0.5;HOB=0.5;AC=2;AN=4;DP4=58,20,51,9;MQ=39	GT:PL:DP:DV:SP:DP4	0/1:146,0,255:43:13:4:23,7,12,1	0/1:255,0,255:95:47:5:35,13,39,8
Locus_2_Transcript_64/4817_Confidence_1.000_Length_582	212	.	G	A	125	PASS	DP=212;VDB=0.516975;SGB=-7.79162;RPB=0.916006;MQB=8.69709e-06;MQSB=0.1032;BQB=0.190744;MQ0F=0;ICB=0.3;HOB=0.125;AC=1;AN=4;DP4=116,28,16,3;MQ=39	GT:PL:DP:DV:SP:DP4	0/1:190,0,255:54:18:0:31,5,15,3	0/0:0,255,255:109:1:0:85,23,1,0
Locus_2_Transcript_64/4817_Confidence_1.000_Length_582	218	.	C	T	160	PASS	DP=216;VDB=0.763356;SGB=-10.2467;RPB=0.94185;MQB=0.000463265;MQSB=0.079953;BQB=0.790603;MQ0F=0;ICB=0.3;HOB=0.125;AC=1;AN=4;DP4=109,25,24,3;MQ=38	GT:PL:DP:DV:SP:DP4	0/1:224,0,255:54:22:0:27,5,19,3	0/0:0,179,255:107:5:2:82,20,5,0
Locus_2_Transcript_64/4817_Confidence_1.000_Length_582	221	.	G	A	126	PASS	DP=220;VDB=0.964366;SGB=-9.63297;RPB=0.447595;MQB=7.17062e-06;MQSB=0.0859236;BQB=0.998635;MQ0F=0;ICB=0.3;HOB=0.125;AC=1;AN=4;DP4=114,26,22,3;MQ=38	GT:PL:DP:DV:SP:DP4	0/1:190,0,255:58:22:0:31,5,19,3	0/0:0,221,255:107:3:0:83,21,3,0
Locus_2_Transcript_64/4817_Confidence_1.000_Length_582	283	.	G	A	136	PASS	DP=250;VDB=0.00631574;SGB=-9.63296;RPB=0.455141;MQB=1.80192e-07;MQSB=0.989289;BQB=0.846362;MQ0F=0;ICB=0.3;HOB=0.125;AC=1;AN=4;DP4=130,35,13,12;MQ=38	GT:PL:DP:DV:SP:DP4	0/1:201,0,255:61:23:11:30,8,13,10	0/0:0,255,255:129:2:13:100,27,0,2
Locus_2_Transcript_64/4817_Confidence_1.000_Length_582	294	.	G	A	118	PASS	DP=264;VDB=0.191961;SGB=-10.5535;RPB=0.425007;MQB=3.88031e-07;MQSB=0.642053;BQB=0.903576;MQ0F=0;ICB=0.3;HOB=0.125;AC=1;AN=4;DP4=115,47,18,10;MQ=38	GT:PL:DP:DV:SP:DP4	0/1:182,0,255:58:21:1:27,10,14,7	0/0:0,159,255:132:7:4:88,37,4,3
Locus_2_Transcript_64/4817_Confidence_1.000_Length_582	300	.	G	A	82	PASS	DP=273;VDB=0.0775486;SGB=-9.32612;RPB=0.0798015;MQB=2.64803e-10;MQSB=0.0995189;BQB=0.286723;MQ0F=0;ICB=0.3;HOB=0.125;AC=1;AN=4;DP4=115,55,18,6;MQ=38	GT:PL:DP:DV:SP:DP4	0/1:147,0,255:60:20:3:26,14,15,5	0/0:0,255,255:134:4:0:89,41,3,1
Locus_2_Transcript_64/4817_Confidence_1.000_Length_582	321	.	G	A	446	PASS	DP=285;VDB=0.461322;SGB=-26.5099;RPB=0.966666;MQB=4.59482e-05;MQSB=0.0797181;BQB=0.216032;MQ0F=0;ICB=0.5;HOB=0.5;AC=2;AN=4;DP4=78,45,57,23;MQ=38	GT:PL:DP:DV:SP:DP4	0/1:255,0,255:60:36:10:13,11,27,9	0/1:255,0,255:143:44:1:65,34,30,14
Locus_2_Transcript_64/4817_Confidence_1.000_Length_582	323	.	G	A	445	PASS	DP=271;VDB=0.548887;SGB=-44.3073;RPB=0.986597;MQB=0.000528861;MQSB=0.0280372;BQB=0.346196;MQ0F=0;ICB=0.5;HOB=0.5;AC=2;AN=4;DP4=40,24,83,55;MQ=38	GT:PL:DP:DV:SP:DP4	0/1:255,0,128:61:50:3:8,3,28,22	0/1:255,0,255:141:88:1:32,21,55,33
Locus_2_Transcript_64/4817_Confidence_1.000_Length_582	368	.	T	C	446	PASS	DP=282;VDB=0.901057;SGB=-36.9429;RPB=0.509892;MQB=0.000501365;MQSB=0.172001;BQB=0.435374;MQ0F=0;ICB=0.5;HOB=0.5;AC=2;AN=4;DP4=64,33,77,37;MQ=38	GT:PL:DP:DV:SP:DP4	0/1:255,0,250:60:39:2:15,6,24,15	0/1:255,0,255:151:75:3:49,27,53,22
Locus_2_Transcript_64/4817_Confidence_1.000_Length_582	379	.	G	A	92	PASS	DP=293;VDB=0.639877;SGB=-7.1777;RPB=0.204023;MQB=0.0906293;MQSB=0.0114889;BQB=0.844105;MQ0F=0;ICB=0.3;HOB=0.125;AC=1;AN=4;DP4=127,72,13,4;MQ=38	GT:PL:DP:DV:SP:DP4	0/1:157,0,255:62:16:11:25,21,13,3	0/0:0,255,255:154:1:0:102,51,0,1
Locus_2_Transcript_64/4817_Confidence_1.000_Length_582	407	.	A	G	447	PASS	DP=293;VDB=0.0573305;SGB=-32.9538;RPB=0.850101;MQB=0.0577203;MQSB=0.717564;BQB=0.496529;MQ0F=0;ICB=0.5;HOB=0.5;AC=2;AN=4;DP4=61,47,55,46;MQ=38	GT:PL:DP:DV:SP:DP4	0/1:255,0,255:63:30:5:19,14,13,17	0/1:255,0,255:146:71:1:42,33,42,29
Locus_2_Transcript_64/4817_Confidence_1.000_Length_582	455	.	A	G	446	PASS	DP=252;VDB=0.184747;SGB=-24.6688;RPB=0.488742;MQB=0.788811;MQSB=0.795832;BQB=0.138139;MQ0F=0;ICB=0.5;HOB=0.5;AC=2;AN=4;DP4=64,35,40,34;MQ=38	GT:PL:DP:DV:SP:DP4	0/1:255,0,255:54:23:6:22,9,12,11	0/1:255,0,255:119:51:3:42,26,28,23
Locus_2_Transcript_64/4817_Confidence_1.000_Length_582	473	.	G	A	259	PASS	DP=236;VDB=0.752658;SGB=-12.3947;RPB=0.995485;MQB=0.829289;MQSB=0.997551;BQB=0.247445;MQ0F=0;ICB=0.5;HOB=0.5;AC=2;AN=4;DP4=62,59,22,12;MQ=36	GT:PL:DP:DV:SP:DP4	0/1:255,0,255:48:20:1:16,12,13,7	0/1:69,0,255:107:14:4:46,47,9,5
Locus_2_Transcript_64/4817_Confidence_1.000_Length_582	477	.	T	C	445	PASS	DP=230;VDB=0.112165;SGB=-36.0223;RPB=0.713454;MQB=0.0643193;MQSB=0.843295;BQB=0.367701;MQ0F=0;ICB=0.5;HOB=0.5;AC=2;AN=4;DP4=15,27,62,49;MQ=36	GT:PL:DP:DV:SP:DP4	0/1:255,0,185:48:36:7:5,7,23,13	0/1:255,0,255:105:75:9:10,20,39,36
Locus_2_Transcript_64/4817_Confidence_1.000_Length_582	545	.	T	C	69	PASS	DP=91;VDB=1.69599e-06;SGB=-6.56403;RPB=0.871542;MQB=0.638082;MQSB=0.117652;BQB=0.601412;MQ0F=0;ICB=0.3;HOB=0.125;AC=1;AN=4;DP4=15,44,2,13;MQ=33	GT:PL:DP:DV:SP:DP4	0/0:0,36,255:23:2:0:7,14,1,1	0/1:133,0,255:51:13:4:8,30,1,12
Locus_2_Transcript_65/4817_Confidence_1.000_Length_214	30	.	A	G	151	PASS	DP=48;VDB=2.76013e-09;SGB=2.69769;RPB=0.153334;MQB=0.595393;BQB=0.980133;MQ0F=0.125;ICB=0.3;HOB=0.125;AC=3;AN=4;DP4=6,0,39,0;MQ=27	GT:PL:DP:DV:SP:DP4	0/1:50,0,40:6:4:0:2,0,4,0	1/1:165,47,0:39:35:0:4,0,35,0
Locus_2_Transcript_65/4817_Confidence_1.000_Length_214	47	.	T	C	214	PASS	DP=87;VDB=3.98215e-12;SGB=1.3709;RPB=0.970342;MQB=0.81832;BQB=0.503478;MQ0F=0.0689655;ICB=0.5;HOB=0.5;AC=2;AN=4;DP4=12,0,57,0;MQ=30	GT:PL:DP:DV:SP:DP4	0/1:143,0,6:12:11:0:1,0,11,0	0/1:138,0,44:57:46:0:11,0,46,0
Locus_2_Transcript_65/4817_Confidence_1.000_Length_214	158	.	T	C	78	PASS	DP=146;VDB=5.3396e-05;SGB=-8.71241;RPB=0.734726;MQB=0.0592186;MQSB=0.580164;BQB=0.964445;MQ0F=0.0273973;ICB=0.5;HOB=0.5;AC=2;AN=4;DP4=37,36,13,9;MQ=30	GT:PL:DP:DV:SP:DP4	0/1:56,0,242:20:5:2:11,4,3,2	0/1:90,0,255:75:17:4:26,32,10,7
Locus_2_Transcript_65/4817_Confidence_1.000_Length_214	161	.	G	A	78	PASS	DP=136;VDB=3.90178e-05;SGB=-8.71241;RPB=0.197987;MQB=0.0592186;MQSB=0.829023;BQB=0.957266;MQ0F=0.0294118;ICB=0.5;HOB=0.5;AC=2;AN=4;DP4=28,45,13,9;MQ=30	GT:PL:DP:DV:SP:DP4	0/1:56,0,255:20:5:0:9,6,3,2	0/1:90,0,255:75:17:11:19,39,10,7
Locus_2_Transcript_66/4817_Confidence_1.000_Length_566	57	.	G	A	180	PASS	DP=139;VDB=2.15538e-06;SGB=-11.7809;RPB=0.527371;MQB=0.945701;BQB=0.969085;MQ0F=0.00719424;ICB=0.5;HOB=0.5;AC=2;AN=4;DP4=73,0,32,0;MQ=32	GT:PL:DP:DV:SP:DP4	0/1:129,0,165:32:10:0:22,0,10,0	0/1:116,0,168:73:22:0:51,0,22,0
Locus_2_Transcript_66/4817_Confidence_1.000_Length_566	68	.	T	C	276	PASS	DP=172;VDB=1.07172e-10;SGB=-24.6688;RPB=0.570409;MQB=1.42423e-05;BQB=0.955304;MQ0F=0.0116279;ICB=0.5;HOB=0.5;AC=2;AN=4;DP4=55,0,74,0;MQ=32	GT:PL:DP:DV:SP:DP4	0/1:168,0,172:42:22:0:20,0,22,0	0/1:171,0,163:87:52:0:35,0,52,0
Locus_2_Transcript_66/4817_Confidence_1.000_Length_566	73	.	G	C	272	PASS	DP=178;VDB=3.78625e-07;SGB=-26.8167;RPB=0.89723;MQB=1.03567e-07;BQB=0.994633;MQ0F=0.011236;ICB=0.5;HOB=0.5;AC=2;AN=4;DP4=52,0,81,0;MQ=32	GT:PL:DP:DV:SP:DP4	0/1:166,0,166:42:26:0:16,0,26,0	0/1:169,0,166:91:55:0:36,0,55,0
Locus_2_Transcript_66/4817_Confidence_1.000_Length_566	187	.	G	A	386	PASS	DP=404;VDB=0.659795;SGB=-39.3977;RPB=0.942454;MQB=1.22884e-13;MQSB=0.1118;BQB=0.399964;MQ0F=0.0173267;ICB=0.5;HOB=0.5;AC=2;AN=4;DP4=118,31,92,30;MQ=31	GT:PL:DP:DV:SP:DP4	0/1:195,0,255:87:35:0:44,8,29,6	0/1:255,0,255:184:87:2:74,23,63,24
Locus_2_Transcript_66/4817_Confidence_1.000_Length_566	188	.	T	A	427	PASS	DP=401;VDB=0.841684;SGB=-44.0005;RPB=0.474495;MQB=3.30565e-12;MQSB=0.123562;BQB=0.0236755;MQ0F=0.0174564;ICB=0.5;HOB=0.5;AC=2;AN=4;DP4=106,25,101,36;MQ=31	GT:PL:DP:DV:SP:DP4	0/1:236,0,255:87:42:0:38,7,35,7	0/1:255,0,255:181:95:8:68,18,66,29
Locus_2_Transcript_66/4817_Confidence_1.000_Length_566	204	.	G	A	274	PASS	DP=397;VDB=0.189352;SGB=-39.7046;RPB=0.703783;MQB=2.70187e-24;MQSB=0.901866;BQB=0.572403;MQ0F=0.02267;ICB=0.5;HOB=0.5;AC=2;AN=4;DP4=139,26,94,29;MQ=28	GT:PL:DP:DV:SP:DP4	0/1:141,0,255:92:34:16:52,6,24,10	0/1:198,0,255:196:89:1:87,20,70,19
Locus_2_Transcript_66/4817_Confidence_1.000_Length_566	244	.	G	A	446	PASS	DP=372;VDB=0.109158;SGB=-55.9678;RPB=0.950543;MQB=0.0048844;MQSB=1.50895e-06;BQB=0.554652;MQ0F=0.0537634;ICB=0.5;HOB=0.5;AC=2;AN=4;DP4=79,29,99,77;MQ=25	GT:PL:DP:DV:SP:DP4	0/1:255,0,178:87:58:18:24,5,32,26	0/1:255,0,244:197:118:11:55,24,67,51
Locus_2_Transcript_66/4817_Confidence_1.000_Length_566	254	.	A	G	435	PASS	DP=394;VDB=0.984217;SGB=-1.29882;RPB=0.967729;MQB=0.17709;MQSB=9.8977e-10;BQB=0.0763716;MQ0F=0.0583756;ICB=0.3;HOB=0.125;AC=3;AN=4;DP4=38,10,158,88;MQ=26	GT:PL:DP:DV:SP:DP4	0/1:255,0,66:93:71:18:20,2,45,26	1/1:244,123,0:201:175:1:18,8,113,62
Locus_2_Transcript_66/4817_Confidence_1.000_Length_566	329	.	C	T	372	PASS	DP=417;VDB=0.0391019;SGB=-36.636;RPB=0.995916;MQB=0.829735;MQSB=0.726381;BQB=0.972836;MQ0F=0.059952;ICB=0.5;HOB=0.5;AC=2;AN=4;DP4=119,79,69,44;MQ=25	GT:PL:DP:DV:SP:DP4	0/1:181,0,255:101:32:6:43,26,16,16	0/1:255,0,255:210:81:4:76,53,53,28
Locus_2_Transcript_66/4817_Confidence_1.000_Length_566	343	.	A	G	290	PASS	DP=391;VDB=0.00956012;SGB=-30.1921;RPB=0.669203;MQB=0.376806;MQSB=0.414724;BQB=0.956425;MQ0F=0.0537084;ICB=0.5;HOB=0.5;AC=2;AN=4;DP4=119,72,62,30;MQ=26	GT:PL:DP:DV:SP:DP4	0/1:136,0,255:94:24:6:43,27,11,13	0/1:219,0,255:189:68:10:76,45,51,17
Locus_2_Transcript_66/4817_Confidence_1.000_Length_566	346	.	G	A	347	PASS	DP=392;VDB=0.000816944;SGB=-32.3401;RPB=0.729629;MQB=0.0798926;MQSB=0.416696;BQB=0.895248;MQ0F=0.0510204;ICB=0.5;HOB=0.5;AC=2;AN=4;DP4=114,69,65,34;MQ=26	GT:PL:DP:DV:SP:DP4	0/1:193,0,255:96:33:4:39,24,17,16	0/1:218,0,255:186:66:7:75,45,48,18
Locus_2_Transcript_66/4817_Confidence_1.000_Length_566	354	.	G	A	386	PASS	DP=384;VDB=0.309895;SGB=-34.1812;RPB=0.613896;MQB=0.46742;MQSB=0.0183414;BQB=0.87372;MQ0F=0.046875;ICB=0.5;HOB=0.5;AC=2;AN=4;DP4=109,68,63,42;MQ=26	GT:PL:DP:DV:SP:DP4	0/1:195,0,255:98:32:17:42,24,12,20	0/1:255,0,255:184:73:7:67,44,51,22
Locus_2_Transcript_66/4817_Confidence_1.000_Length_566	383	.	A	G	197	PASS	DP=368;VDB=0.493217;SGB=-23.1345;RPB=0.977041;MQB=0.657727;MQSB=2.32873e-06;BQB=0.477551;MQ0F=0.0326087;ICB=0.5;HOB=0.5;AC=2;AN=4;DP4=122,96,33,36;MQ=28	GT:PL:DP:DV:SP:DP4	0/1:208,0,255:91:30:0:23,38,12,18	0/1:55,0,252:196:39:4:99,58,21,18
Locus_2_Transcript_66/4817_Confidence_1.000_Length_566	396	.	C	A	339	PASS	DP=340;VDB=0.392499;SGB=-32.9538;RPB=0.257197;MQB=0.035158;MQSB=2.65791e-09;BQB=0.999412;MQ0F=0.0294118;ICB=0.5;HOB=0.5;AC=2;AN=4;DP4=87,84,51,50;MQ=30	GT:PL:DP:DV:SP:DP4	0/1:149,0,255:87:27:5:25,35,8,19	0/1:255,0,255:185:74:1:62,49,43,31
Locus_2_Transcript_67/4817_Confidence_1.000_Length_362	15	.	T	C	138	PASS	DP=95;VDB=1.51396e-13;SGB=-12.7015;RPB=0.579883;MQB=0.24079;BQB=0.559719;MQ0F=0.0210526;ICB=0.5;HOB=0.5;AC=2;AN=4;DP4=46,0,35,0;MQ=30	GT:PL:DP:DV:SP:DP4	0/1:62,0,150:40:16:0:24,0,16,0	0/1:140,0,157:41:19:0:22,0,19,0
Locus_2_Transcript_67/4817_Confidence_1.000_Length_362	30	.	C	T	262	PASS	DP=132;VDB=7.0113e-31;SGB=-17.918;RPB=0.760279;MQB=0.735592;BQB=0.911987;MQ0F=0.0151515;ICB=0.5;HOB=0.5;AC=2;AN=4;DP4=40,0,52,0;MQ=31	GT:PL:DP:DV:SP:DP4	0/1:152,0,122:43:25:0:18,0,25,0	0/1:174,0,170:49:27:0:22,0,27,0
Locus_2_Transcript_67/4817_Confidence_1.000_Length_362	42	.	A	G	375	PASS	DP=158;VDB=1.08018e-23;SGB=-1.38629;RPB=1;MQB=1;BQB=1;MQ0F=0.0126582;AC=4;AN=4;DP4=1,0,99,0;MQ=31	GT:PL:DP:DV:SP:DP4	1/1:198,115,0:47:46:0:1,0,46,0	1/1:231,160,0:53:53:0:0,0,53,0
Locus_2_Transcript_67/4817_Confidence_1.000_Length_362	76	.	C	T	129	PASS	DP=248;VDB=0.505297;SGB=-15.4632;RPB=0.444745;MQB=0.295033;BQB=0.879571;MQ0F=0.00806452;ICB=0.5;HOB=0.5;AC=2;AN=4;DP4=120,0,44,0;MQ=35	GT:PL:DP:DV:SP:DP4	0/1:73,0,158:70:17:0:53,0,17,0	0/1:122,0,179:94:27:0:67,0,27,0
Locus_2_Transcript_67/4817_Confidence_1.000_Length_362	121	.	A	G	349	PASS	DP=311;VDB=0.915733;SGB=-28.9647;RPB=0.185001;MQB=0.0686943;MQSB=2.73713e-05;BQB=0.935944;MQ0F=0.00643087;ICB=0.5;HOB=0.5;AC=2;AN=4;DP4=104,14,84,4;MQ=37	GT:PL:DP:DV:SP:DP4	0/1:182,0,255:85:30:13:44,11,29,1	0/1:231,0,255:121:58:0:60,3,55,3
Locus_2_Transcript_67/4817_Confidence_1.000_Length_362	144	.	G	A	430	PASS	DP=298;VDB=0.64732;SGB=-22.8277;RPB=0.30593;MQB=0.966729;MQSB=0.000122911;BQB=0.93299;MQ0F=0;ICB=0.5;HOB=0.5;AC=2;AN=4;DP4=121,31,50,18;MQ=38	GT:PL:DP:DV:SP:DP4	0/1:255,0,255:82:30:4:43,9,22,8	0/1:240,0,255:138:38:2:78,22,28,10
Locus_2_Transcript_67/4817_Confidence_1.000_Length_362	258	.	G	A	354	PASS	DP=411;VDB=0.0651038;SGB=-21.6002;RPB=0.977061;MQB=0.517205;MQSB=0.824458;BQB=0.999237;MQ0F=0;ICB=0.5;HOB=0.5;AC=2;AN=4;DP4=118,68,42,22;MQ=36	GT:PL:DP:DV:SP:DP4	0/1:183,0,255:94:21:18:56,17,10,11	0/1:237,0,255:156:43:15:62,51,32,11
Locus_2_Transcript_67/4817_Confidence_1.000_Length_362	300	.	C	T	446	PASS	DP=264;VDB=5.85036e-06;SGB=-26.5099;RPB=0.579568;MQB=0.824954;MQSB=0.505807;BQB=0.971983;MQ0F=0;ICB=0.5;HOB=0.5;AC=2;AN=4;DP4=41,71,30,50;MQ=34	GT:PL:DP:DV:SP:DP4	0/1:255,0,255:70:22:1:20,28,10,12	0/1:255,0,255:122:58:1:21,43,20,38
Locus_2_Transcript_70/4817_Confidence_1.000_Length_216	68	.	T	C	112	PASS	DP=81;VDB=3.2927e-05;SGB=-7.48501;RPB=0.478674;MQB=0.997961;BQB=0.877558;MQ0F=0.0617284;ICB=0.5;HOB=0.5;AC=2;AN=4;DP4=30,0,18,0;MQ=24	GT:PL:DP:DV:SP:DP4	0/1:114,0,113:18:10:0:8,0,10,0	0/1:62,0,152:30:8:0:22,0,8,0
Locus_2_Transcript_70/4817_Confidence_1.000_Length_216	148	.	A	G	239	PASS	DP=53;VDB=0.0398814;SGB=-1.32177;RPB=0.413941;MQB=0.0615652;MQSB=0.0808668;BQB=0.0410299;MQ0F=0.264151;ICB=0.3;HOB=0.125;AC=3;AN=4;DP4=6,2,9,20;MQ=18	GT:PL:DP:DV:SP:DP4	1/1:150,16,0:14:11:16:3,0,2,9	0/1:153,0,13:23:18:2:3,2,7,11
Locus_2_Transcript_70/4817_Confidence_1.000_Length_216	169	.	C	T	71	PASS	DP=33;VDB=9.23313e-07;SGB=-7.79186;RPB=0.289685;MQB=0.886041;MQSB=0.158456;BQB=0.483717;MQ0F=0.363636;ICB=0.5;HOB=0.5;AC=2;AN=4;DP4=0,9,5,14;MQ=14	GT:PL:DP:DV:SP:DP4	0/1:43,0,45:10:7:0:0,3,2,5	0/1:92,0,14:18:12:3:0,6,3,9
Locus_2_Transcript_71/4817_Confidence_1.000_Length_270	125	.	T	C	189	PASS	DP=192;VDB=0.677854;SGB=-14.8495;RPB=0.425809;MQB=1.32451e-05;MQSB=0.00143728;BQB=0.883295;MQ0F=0;ICB=0.5;HOB=0.5;AC=2;AN=4;DP4=70,9,36,6;MQ=32	GT:PL:DP:DV:SP:DP4	0/1:75,0,255:27:10:12:11,6,10,0	0/1:180,0,255:94:32:12:59,3,26,6
Locus_2_Transcript_71/4817_Confidence_1.000_Length_270	135	.	T	C	67	PASS	DP=189;VDB=0.919069;SGB=-11.4741;RPB=0.140413;MQB=6.63404e-06;MQSB=0.0319839;BQB=0.853161;MQ0F=0;ICB=0.5;HOB=0.5;AC=2;AN=4;DP4=73,16,28,3;MQ=32	GT:PL:DP:DV:SP:DP4	0/1:49,0,255:28:8:15:11,9,8,0	0/1:86,0,255:92:23:2:62,7,20,3
Locus_2_Transcript_72/4817_Confidence_1.000_Length_213	117	.	A	C	157	PASS	DP=63;VDB=0.0398022;SGB=-5.33677;RPB=0.654758;MQB=0.983203;MQSB=0.0113334;BQB=0.478123;MQ0F=0;ICB=0.5;HOB=0.5;AC=2;AN=4;DP4=19,4,11,0;MQ=36	GT:PL:DP:DV:SP:DP4	0/1:133,0,145:13:6:0:7,0,6,0	0/1:88,0,233:21:5:3:12,4,5,0
Locus_2_Transcript_73/4817_Confidence_1.000_Length_370	63	.	T	G	106	PASS	DP=40;VDB=0.0315769;SGB=-5.64336;RPB=0.177389;MQB=0.765741;BQB=0.463649;MQ0F=0.05;ICB=0.5;HOB=0.5;AC=2;AN=4;DP4=17,0,12,0;MQ=39	GT:PL:DP:DV:SP:DP4	0/1:44,0,163:13:3:0:10,0,3,0	0/1:126,0,139:16:9:0:7,0,9,0
Locus_2_Transcript_73/4817_Confidence_1.000_Length_370	83	.	T	C	173	PASS	DP=56;VDB=0.1448;SGB=-6.25752;RPB=0.633716;MQB=0.990119;BQB=0.888867;MQ0F=0.0357143;ICB=0.5;HOB=0.5;AC=2;AN=4;DP4=23,0,14,0;MQ=39	GT:PL:DP:DV:SP:DP4	0/1:94,0,161:15:5:0:10,0,5,0	0/1:143,0,177:22:9:0:13,0,9,0
Locus_2_Transcript_73/4817_Confidence_1.000_Length_370	167	.	C	A	191	PASS	DP=59;VDB=0.703185;SGB=-5.64373;RPB=0.989171;MQB=0.939209;MQSB=0.931964;BQB=0.999021;MQ0F=0;ICB=0.5;HOB=0.5;AC=2;AN=4;DP4=19,9,8,4;MQ=41	GT:PL:DP:DV:SP:DP4	0/1:108,0,246:16:5:10:5,6,5,0	0/1:148,0,255:24:7:9:14,3,3,4
Locus_2_Transcript_73/4817_Confidence_1.000_Length_370	277	.	T	A	69	PASS	DP=50;VDB=0.198876;SGB=-4.09964;RPB=0.311619;MQB=0.97436;MQSB=0.439981;BQB=0.983514;MQ0F=0;ICB=0.3;HOB=0.125;AC=1;AN=4;DP4=13,12,3,4;MQ=38	GT:PL:DP:DV:SP:DP4	0/0:0,11,255:16:1:0:10,5,0,1	0/1:133,0,220:16:6:2:3,7,3,3
Locus_2_Transcript_75/4817_Confidence_1.000_Length_769	157	.	C	T	161	PASS	DP=133;VDB=0.64487;SGB=-8.40557;RPB=0.572625;MQB=0.994779;MQSB=0.672897;BQB=0.918107;MQ0F=0;ICB=0.5;HOB=0.5;AC=2;AN=4;DP4=67,15,18,3;MQ=41	GT:PL:DP:DV:SP:DP4	0/1:105,0,255:57:10:0:38,9,8,2	0/1:123,0,255:46:11:0:29,6,10,1
Locus_2_Transcript_75/4817_Confidence_1.000_Length_769	432	.	C	T	313	PASS	DP=105;VDB=0.245445;SGB=-9.01927;RPB=0.988301;MQB=0.955611;MQSB=0.992091;BQB=0.839395;MQ0F=0;ICB=0.5;HOB=0.5;AC=2;AN=4;DP4=39,16,16,7;MQ=41	GT:PL:DP:DV:SP:DP4	0/1:187,0,255:44:12:0:22,10,8,4	0/1:191,0,255:34:11:0:17,6,8,3
Locus_2_Transcript_78/4817_Confidence_1.000_Length_434	75	.	C	T	122	PASS	DP=94;VDB=0.00694975;SGB=11.6141;RPB=0.881279;MQB=0.560329;BQB=0.946125;MQ0F=0;ICB=0.3;HOB=0.125;AC=1;AN=4;DP4=47,0,19,0;MQ=40	GT:PL:DP:DV:SP:DP4	0/1:186,0,170:34:19:0:15,0,19,0	0/0:0,96,225:32:0:0:32,0,0,0
Locus_2_Transcript_78/4817_Confidence_1.000_Length_434	320	.	T	C	191	PASS	DP=106;VDB=0.330227;SGB=11.6141;RPB=0.295451;MQB=0.956589;MQSB=0.975093;BQB=0.725375;MQ0F=0;ICB=0.3;HOB=0.125;AC=1;AN=4;DP4=17,51,5,14;MQ=41	GT:PL:DP:DV:SP:DP4	0/0:0,163,255:54:0:0:12,42,0,0	0/1:255,0,252:33:19:2:5,9,5,14
Locus_2_Transcript_78/4817_Confidence_1.000_Length_434	394	.	C	T	367	PASS	DP=31;VDB=9.98506e-06;SGB=-1.09901;RPB=1;MQB=1;MQSB=0.995012;BQB=1;MQ0F=0;AC=4;AN=4;DP4=1,0,5,18;MQ=39	GT:PL:DP:DV:SP:DP4	1/1:255,48,0:16:16:0:0,0,3,13	1/1:170,0,4:8:7:0:1,0,2,5
Locus_2_Transcript_80/4817_Confidence_1.000_Length_427	140	.	C	T	455	PASS	DP=928;VDB=0.959868;SGB=-1.38629;RPB=0.543317;MQB=5.85199e-06;MQSB=3.50094e-13;BQB=0.110876;MQ0F=0.0140086;AC=4;AN=4;DP4=38,10,453,104;MQ=35	GT:PL:DP:DV:SP:DP4	1/1:255,255,0:259:244:0:13,2,205,39	1/1:255,255,0:346:313:2:25,8,248,65
Locus_2_Transcript_80/4817_Confidence_1.000_Length_427	204	.	T	C	191	PASS	DP=742;VDB=0.978712;SGB=-47.3759;RPB=0.460447;MQB=4.31346e-10;MQSB=0.06314;BQB=0.78104;MQ0F=0.06469;ICB=0.3;HOB=0.125;AC=1;AN=4;DP4=270,132,102,46;MQ=35	GT:PL:DP:DV:SP:DP4	0/0:0,232,255:261:33:7:167,61,28,5	0/1:255,0,255:289:115:4:103,71,74,41
Locus_2_Transcript_80/4817_Confidence_1.000_Length_427	232	.	T	G	185	PASS	DP=643;VDB=0.0906966;SGB=-33.2606;RPB=0.0130315;MQB=1.65205e-14;MQSB=0.315384;BQB=0.320525;MQ0F=0.102644;ICB=0.3;HOB=0.125;AC=1;AN=4;DP4=186,118,76,26;MQ=34	GT:PL:DP:DV:SP:DP4	0/0:0,86,255:208:38:26:123,47,36,2	0/1:249,0,255:198:64:13:63,71,40,24
Locus_2_Transcript_80/4817_Confidence_1.000_Length_427	335	.	T	C	191	PASS	DP=379;VDB=0.00050743;SGB=-26.5099;RPB=0.45375;MQB=5.47096e-07;MQSB=0.297118;BQB=0.311014;MQ0F=0.0527704;ICB=0.3;HOB=0.125;AC=1;AN=4;DP4=72,128,20,60;MQ=37	GT:PL:DP:DV:SP:DP4	0/0:0,49,255:120:16:6:29,75,2,14	0/1:255,0,255:160:64:13:43,53,18,46
Locus_2_Transcript_83/4817_Confidence_1.000_Length_221	145	.	T	C	284	PASS	DP=223;VDB=0.000286831;SGB=-12.0878;RPB=0.95066;MQB=0.534859;MQSB=0.126097;BQB=0.67254;MQ0F=0;ICB=0.5;HOB=0.5;AC=2;AN=4;DP4=69,29,21,12;MQ=39	GT:PL:DP:DV:SP:DP4	0/1:94,0,255:90:14:0:55,21,10,4	0/1:255,0,255:41:19:1:14,8,11,8
Locus_2_Transcript_84/4817_Confidence_1.000_Length_509	95	.	A	C	344	PASS	DP=279;VDB=0.0026455;SGB=-1.38629;RPB=0.320616;MQB=1.81502e-05;MQSB=1;BQB=0.703192;MQ0F=0.0179211;AC=4;AN=4;DP4=15,0,191,1;MQ=36	GT:PL:DP:DV:SP:DP4	1/1:218,225,0:113:109:0:4,0,109,0	1/1:181,72,0:94:83:0:11,0,82,1
Locus_2_Transcript_84/4817_Confidence_1.000_Length_509	244	.	A	G	446	PASS	DP=361;VDB=0.960917;SGB=-50.7513;RPB=0.430557;MQB=0.0209995;MQSB=0.91664;BQB=0.668551;MQ0F=0.00277008;ICB=0.5;HOB=0.5;AC=2;AN=4;DP4=57,49,98,61;MQ=39	GT:PL:DP:DV:SP:DP4	0/1:255,0,255:149:66:4:42,41,38,28	0/1:255,0,165:116:93:0:15,8,60,33
Locus_2_Transcript_84/4817_Confidence_1.000_Length_509	258	.	C	T	385	PASS	DP=324;VDB=0.529032;SGB=-25.8962;RPB=0.54121;MQB=0.218864;MQSB=0.872616;BQB=0.530128;MQ0F=0;ICB=0.5;HOB=0.5;AC=2;AN=4;DP4=106,70,43,35;MQ=40	GT:PL:DP:DV:SP:DP4	0/1:255,0,255:139:49:4:52,38,24,25	0/1:195,0,255:115:29:1:54,32,19,10
Locus_2_Transcript_84/4817_Confidence_1.000_Length_509	282	.	T	C	447	PASS	DP=337;VDB=0.474582;SGB=-43.0799;RPB=0.971559;MQB=0.0174397;MQSB=0.983438;BQB=0.877747;MQ0F=0;ICB=0.5;HOB=0.5;AC=2;AN=4;DP4=67,56,82,52;MQ=40	GT:PL:DP:DV:SP:DP4	0/1:255,0,255:134:55:1:40,39,29,26	0/1:255,0,255:123:79:3:27,17,53,26
Locus_2_Transcript_86/4817_Confidence_1.000_Length_217	32	.	G	A	126	PASS	DP=36;VDB=3.87232e-06;SGB=-5.64373;RPB=0.0137638;MQB=0.0720956;BQB=0.232624;MQ0F=0.111111;ICB=0.5;HOB=0.5;AC=2;AN=4;DP4=15,0,12,0;MQ=23	GT:PL:DP:DV:SP:DP4	0/1:98,0,82:16:7:0:9,0,7,0	0/1:91,0,5:11:5:0:6,0,5,0
Locus_2_Transcript_86/4817_Confidence_1.000_Length_217	35	.	C	T	145	PASS	DP=40;VDB=1.65717e-06;SGB=-6.5644;RPB=0.0228227;MQB=0.201704;BQB=0.0504553;MQ0F=0.1;ICB=0.5;HOB=0.5;AC=2;AN=4;DP4=14,0,15,0;MQ=24	GT:PL:DP:DV:SP:DP4	0/1:117,0,96:18:10:0:8,0,10,0	0/1:91,0,5:11:5:0:6,0,5,0
Locus_2_Transcript_86/4817_Confidence_1.000_Length_217	65	.	C	T	267	PASS	DP=81;VDB=0.0185548;SGB=-12.0878;RPB=0.00983124;MQB=0.158526;BQB=0.347619;MQ0F=0.0740741;ICB=0.3;HOB=0.125;AC=3;AN=4;DP4=19,0,33,0;MQ=30	GT:PL:DP:DV:SP:DP4	0/1:166,0,123:35:22:0:13,0,22,0	1/1:164,4,0:17:11:0:6,0,11,0
Locus_2_Transcript_86/4817_Confidence_1.000_Length_217	141	.	C	T	429	PASS	DP=133;VDB=1.14965e-12;SGB=-18.2249;RPB=0.171794;MQB=0.90735;MQSB=0.00112018;BQB=0.442094;MQ0F=0.0300752;ICB=0.5;HOB=0.5;AC=2;AN=4;DP4=14,9,42,11;MQ=31	GT:PL:DP:DV:SP:DP4	0/1:255,0,212:47:30:0:12,5,22,8	0/1:240,0,24:29:23:17:2,4,20,3
Locus_2_Transcript_86/4817_Confidence_1.000_Length_217	179	.	C	T	409	PASS	DP=103;VDB=1.47468e-13;SGB=-15.4632;RPB=0.91315;MQB=0.583774;MQSB=0.978866;BQB=0.853434;MQ0F=0.0291262;ICB=0.5;HOB=0.5;AC=2;AN=4;DP4=9,8,28,16;MQ=33	GT:PL:DP:DV:SP:DP4	0/1:255,0,210:41:27:0:7,7,13,14	0/1:220,0,26:20:17:4:2,1,15,2
Locus_2_Transcript_87/4817_Confidence_1.000_Length_611	443	.	C	T	123	PASS	DP=27;VDB=0.569657;SGB=4.69269;RPB=0.477679;MQB=1;MQSB=1;BQB=0.567987;MQ0F=0;ICB=0.3;HOB=0.125;AC=1;AN=4;DP4=5,6,3,6;MQ=42	GT:PL:DP:DV:SP:DP4	0/1:187,0,103:13:9:0:2,2,3,6	0/0:0,21,218:7:0:0:3,4,0,0
Locus_2_Transcript_87/4817_Confidence_1.000_Length_611	476	.	G	A	85	PASS	DP=20;VDB=0.177551;SGB=2.63044;RPB=0.367879;MQB=1;MQSB=1;BQB=0.711573;MQ0F=0;ICB=0.3;HOB=0.125;AC=1;AN=4;DP4=4,5,1,5;MQ=42	GT:PL:DP:DV:SP:DP4	0/1:149,0,88:9:6:6:2,1,1,5	0/0:0,18,188:6:0:0:2,4,0,0
Locus_2_Transcript_88/4817_Confidence_1.000_Length_219	136	.	C	T	66	PASS	DP=241;VDB=0.00155524;SGB=-24.3619;RPB=0.140941;MQB=1.27763e-20;MQSB=0.012382;BQB=0.0747466;MQ0F=0.0705394;ICB=0.5;HOB=0.5;AC=2;AN=4;DP4=54,15,45,28;MQ=23	GT:PL:DP:DV:SP:DP4	0/1:42,0,255:81:31:14:40,10,18,13	0/1:89,0,224:61:42:2:14,5,27,15
Locus_2_Transcript_88/4817_Confidence_1.000_Length_219	142	.	T	C	96	PASS	DP=225;VDB=0.00603651;SGB=-24.6688;RPB=0.428401;MQB=2.07172e-20;MQSB=0.0531588;BQB=0.00409049;MQ0F=0.0755556;ICB=0.5;HOB=0.5;AC=2;AN=4;DP4=49,13,39,35;MQ=23	GT:PL:DP:DV:SP:DP4	0/1:33,0,255:79:32:25:38,9,15,17	0/1:127,0,188:57:42:4:11,4,24,18
Locus_2_Transcript_88/4817_Confidence_1.000_Length_219	159	.	T	C	71	PASS	DP=162;VDB=3.21636e-12;SGB=-18.8386;RPB=0.0370192;MQB=1.78847e-16;MQSB=0.00710245;BQB=0.00551112;MQ0F=0.0679012;ICB=0.3;HOB=0.125;AC=1;AN=4;DP4=34,21,16,39;MQ=24	GT:PL:DP:DV:SP:DP4	0/0:0,5,255:61:20:31:28,13,4,16	0/1:134,0,191:49:35:1:6,8,12,23
Locus_2_Transcript_89/4817_Confidence_1.000_Length_940	117	.	T	C	329	PASS	DP=187;VDB=0.999994;SGB=-33.2606;RPB=0.0302609;MQB=4.57914e-05;MQSB=0.193214;BQB=0.97033;MQ0F=0.304813;ICB=0.3;HOB=0.125;AC=3;AN=4;DP4=33,4,98,4;MQ=25	GT:PL:DP:DV:SP:DP4	0/1:162,0,205:96:59:17:33,4,59,0	1/1:231,129,0:43:43:0:0,0,39,4
Locus_2_Transcript_89/4817_Confidence_1.000_Length_940	132	.	A	T	372	PASS	DP=208;VDB=0.999996;SGB=-1.38629;RPB=0.0082029;MQB=1.95369e-06;MQSB=0.451546;BQB=0.99099;MQ0F=0.288462;ICB=0.3;HOB=0.125;AC=3;AN=4;DP4=34,0,96,7;MQ=25	GT:PL:DP:DV:SP:DP4	0/1:185,0,159:92:58:0:34,0,57,1	1/1:251,135,0:45:45:0:0,0,39,6
Locus_2_Transcript_89/4817_Confidence_1.000_Length_940	255	.	G	A	191	PASS	DP=202;VDB=0.113444;SGB=27.556;RPB=0.998562;MQB=0.0270951;MQSB=0.000387984;BQB=0.968613;MQ0F=0.10396;ICB=0.3;HOB=0.125;AC=1;AN=4;DP4=61,39,29,13;MQ=33	GT:PL:DP:DV:SP:DP4	0/1:255,0,255:94:42:4:31,21,29,13	0/0:0,144,255:48:0:0:30,18,0,0
Locus_2_Transcript_89/4817_Confidence_1.000_Length_940	479	.	G	A	103	PASS	DP=141;VDB=0.0026191;SGB=-9.93983;RPB=0.945681;MQB=8.00393e-07;MQSB=0.996908;BQB=0.457932;MQ0F=0.177305;ICB=0.3;HOB=0.125;AC=1;AN=4;DP4=52,33,16,10;MQ=35	GT:PL:DP:DV:SP:DP4	0/0:0,97,255:74:11:0:32,31,6,5	0/1:168,0,238:37:15:10:20,2,10,5
Locus_2_Transcript_89/4817_Confidence_1.000_Length_940	898	.	C	T	82	PASS	DP=59;VDB=0.000692184;SGB=4.00342;RPB=0.995626;MQB=0.645125;MQSB=0.0106153;BQB=0.999513;MQ0F=0;ICB=0.3;HOB=0.125;AC=1;AN=4;DP4=13,22,3,5;MQ=37	GT:PL:DP:DV:SP:DP4	0/0:0,84,255:28:0:0:10,18,0,0	0/1:146,0,124:15:8:0:3,4,3,5
Locus_2_Transcript_89/4817_Confidence_1.000_Length_940	907	.	T	C	70	PASS	DP=47;VDB=0.0012151;SGB=3.31571;RPB=0.463048;MQB=0.578035;MQSB=0.00109057;BQB=0.82491;MQ0F=0;ICB=0.3;HOB=0.125;AC=1;AN=4;DP4=7,23,3,4;MQ=36	GT:PL:DP:DV:SP:DP4	0/0:0,72,255:24:0:0:5,19,0,0	0/1:134,0,107:13:7:0:2,4,3,4
Locus_2_Transcript_90/4817_Confidence_1.000_Length_642	447	.	T	G	137	PASS	DP=263;VDB=0.30899;SGB=-7.79174;RPB=0.814098;MQB=0.607479;MQSB=0.631305;BQB=0.402735;MQ0F=0.155894;ICB=0.3;HOB=0.125;AC=1;AN=4;DP4=97,68,12,7;MQ=35	GT:PL:DP:DV:SP:DP4	0/0:0,255,255:112:2:0:64,46,1,1	0/1:202,0,255:72:17:1:33,22,11,6
Locus_2_Transcript_90/4817_Confidence_1.000_Length_642	485	.	C	T	191	PASS	DP=245;VDB=0.991246;SGB=-21.9071;RPB=0.682694;MQB=0.0462398;MQSB=0.746741;BQB=0.964174;MQ0F=0.0693878;ICB=0.3;HOB=0.125;AC=1;AN=4;DP4=65,35,47,18;MQ=39	GT:PL:DP:DV:SP:DP4	0/1:255,0,255:105:59:10:26,20,43,16	0/0:0,79,255:60:6:0:39,15,4,2
Locus_2_Transcript_91/4817_Confidence_1.000_Length_399	67	.	C	T	107	PASS	DP=141;VDB=0.0371502;SGB=15.7726;RPB=0.242802;MQB=0.533063;BQB=0.986487;MQ0F=0;ICB=0.3;HOB=0.125;AC=1;AN=4;DP4=72,0,25,0;MQ=37	GT:PL:DP:DV:SP:DP4	0/1:171,0,186:62:25:0:37,0,25,0	0/0:0,105,217:35:0:0:35,0,0,0
Locus_2_Transcript_92/4817_Confidence_1.000_Length_636	368	.	A	C	65	PASS	DP=38;VDB=0.127985;SGB=1.27626;RPB=0.996716;MQB=0.986928;MQSB=0.83771;BQB=0.324386;MQ0F=0;ICB=0.5;HOB=0.5;AC=2;AN=4;DP4=16,3,1,3;MQ=41	GT:PL:DP:DV:SP:DP4	1/1:134,12,0:4:4:0:0,0,1,3	0/0:0,57,255:19:0:0:16,3,0,0
Locus_2_Transcript_94/4817_Confidence_1.000_Length_246	33	.	G	C	71	PASS	DP=69;VDB=8.71802e-15;SGB=-13.3152;RPB=0.650456;MQB=0.000123774;BQB=0.371966;MQ0F=0.0724638;ICB=0.3;HOB=0.125;AC=3;AN=4;DP4=23,0,37,0;MQ=22	GT:PL:DP:DV:SP:DP4	0/1:73,0,140:54:31:0:23,0,31,0	1/1:62,18,0:6:6:0:0,0,6,0
Locus_2_Transcript_94/4817_Confidence_1.000_Length_246	184	.	G	A	103	PASS	DP=198;VDB=0.00873016;SGB=-5.6418;RPB=0.0166571;MQB=0.0676599;MQSB=0.240279;BQB=0.178407;MQ0F=0.0656566;ICB=0.3;HOB=0.125;AC=1;AN=4;DP4=53,71,9,3;MQ=25	GT:PL:DP:DV:SP:DP4	0/0:0,255,255:103:1:0:43,59,0,1	0/1:167,0,137:33:11:12:10,12,9,2
Locus_2_Transcript_96/4817_Confidence_1.000_Length_262	115	.	C	T	69	PASS	DP=63;VDB=0.139654;SGB=-5.02958;RPB=0.297997;MQB=0.135157;MQSB=0.215242;BQB=0.43939;MQ0F=0;ICB=0.5;HOB=0.5;AC=2;AN=4;DP4=24,3,10,0;MQ=33	GT:PL:DP:DV:SP:DP4	0/1:45,0,156:14:4:0:10,0,4,0	0/1:90,0,229:23:6:3:14,3,6,0
Locus_2_Transcript_99/4817_Confidence_1.000_Length_263	61	.	T	C	110	PASS	DP=36;VDB=0.000155037;SGB=-8.7124;RPB=0.438629;MQB=0.971761;BQB=0.356561;MQ0F=0.0555556;ICB=0.5;HOB=0.5;AC=2;AN=4;DP4=9,0,22,0;MQ=29	GT:PL:DP:DV:SP:DP4	0/1:144,0,53:23:19:0:4,0,19,0	0/1:30,0,58:8:3:0:5,0,3,0
Locus_2_Transcript_99/4817_Confidence_1.000_Length_263	108	.	C	T	97	PASS	DP=92;VDB=0.0457545;SGB=18.5451;RPB=0.932809;MQB=0.368078;BQB=0.503798;MQ0F=0.0217391;ICB=0.3;HOB=0.125;AC=1;AN=4;DP4=25,0,29,0;MQ=29	GT:PL:DP:DV:SP:DP4	0/1:161,0,121:41:29:0:12,0,29,0	0/0:0,39,170:13:0:0:13,0,0,0
Locus_2_Transcript_99/4817_Confidence_1.000_Length_263	152	.	A	G	160	PASS	DP=118;VDB=0.0621027;SGB=18.5451;RPB=0.95303;MQB=0.278858;MQSB=0.050871;BQB=0.997729;MQ0F=0.00847458;ICB=0.3;HOB=0.125;AC=1;AN=4;DP4=30,5,24,5;MQ=29	GT:PL:DP:DV:SP:DP4	0/1:224,0,164:51:29:12:22,0,24,5	0/0:0,39,230:13:0:0:8,5,0,0
Locus_2_Transcript_99/4817_Confidence_1.000_Length_263	163	.	G	A	227	PASS	DP=109;VDB=0.00634568;SGB=-12.3947;RPB=0.124599;MQB=0.907227;MQSB=0.986093;BQB=0.750046;MQ0F=0.00917431;ICB=0.5;HOB=0.5;AC=2;AN=4;DP4=19,10,26,8;MQ=29	GT:PL:DP:DV:SP:DP4	0/1:255,0,198:50:32:1:15,3,24,8	0/1:36,0,176:13:2:7:4,7,2,0
Locus_2_Transcript_99/4817_Confidence_1.000_Length_263	183	.	G	A	161	PASS	DP=93;VDB=2.6649e-05;SGB=-6.87123;RPB=0.204488;MQB=0.376316;MQSB=0.0530277;BQB=0.0149869;MQ0F=0;ICB=0.5;HOB=0.5;AC=2;AN=4;DP4=19,24,15,1;MQ=31	GT:PL:DP:DV:SP:DP4	0/1:121,0,255:50:12:21:18,20,11,1	0/1:104,0,116:9:4:13:1,4,4,0
Locus_2_Transcript_99/4817_Confidence_1.000_Length_263	200	.	A	G	227	PASS	DP=75;VDB=0.00014597;SGB=-10.5535;RPB=0.999471;MQB=0.0269767;MQSB=0.00440482;BQB=0.2859;MQ0F=0;ICB=0.5;HOB=0.5;AC=2;AN=4;DP4=13,6,12,16;MQ=31	GT:PL:DP:DV:SP:DP4	0/1:243,0,184:40:26:10:11,3,12,14	0/1:48,0,146:7:2:0:2,3,0,2
Locus_2_Transcript_99/4817_Confidence_1.000_Length_263	210	.	C	A	192	PASS	DP=65;VDB=3.17827e-06;SGB=-9.3261;RPB=0.88726;MQB=0.271816;MQSB=0.0398268;BQB=0.181841;MQ0F=0;ICB=0.5;HOB=0.5;AC=2;AN=4;DP4=14,5,8,16;MQ=30	GT:PL:DP:DV:SP:DP4	0/1:214,0,196:37:22:18:12,3,8,14	0/1:42,0,124:6:2:3:2,2,0,2
Locus_2_Transcript_99/4817_Confidence_1.000_Length_263	221	.	G	C	115	PASS	DP=53;VDB=0.000120757;SGB=-9.0192;RPB=0.797916;MQB=0.0517162;MQSB=0.954326;BQB=0.335329;MQ0F=0;ICB=0.3;HOB=0.125;AC=1;AN=4;DP4=6,9,5,18;MQ=29	GT:PL:DP:DV:SP:DP4	0/1:177,0,182:33:22:9:6,5,5,17	0/0:0,1,100:5:1:0:0,4,0,1
Locus_2_Transcript_99/4817_Confidence_1.000_Length_263	225	.	C	T	85	PASS	DP=36;VDB=0.00194101;SGB=-4.09964;RPB=0.0230557;MQB=0.0455297;MQSB=0.99688;BQB=0.233622;MQ0F=0;ICB=0.5;HOB=0.5;AC=2;AN=4;DP4=5,14,5,2;MQ=30	GT:PL:DP:DV:SP:DP4	0/1:128,0,171:21:6:12:5,10,5,1	0/1:22,0,86:5:1:0:0,4,0,1
Locus_2_Transcript_99/4817_Confidence_1.000_Length_263	226	.	A	G	290	PASS	DP=36;VDB=9.80223e-07;SGB=0.204537;RPB=1;MQB=1;MQSB=0.99688;BQB=1;MQ0F=0;ICB=0.3;HOB=0.125;AC=3;AN=4;DP4=0,1,10,15;MQ=30	GT:PL:DP:DV:SP:DP4	1/1:255,63,0:21:21:0:0,0,10,11	0/1:100,0,22:5:4:0:0,1,0,4
Locus_2_Transcript_100/4817_Confidence_1.000_Length_274	218	.	C	G	152	PASS	DP=15;VDB=0.0506918;SGB=-0.827256;RPB=0.857404;MQB=0.857404;MQSB=0.857404;BQB=0.995736;MQ0F=0;ICB=0.5;HOB=0.5;AC=2;AN=4;DP4=1,2,2,7;MQ=38	GT:PL:DP:DV:SP:DP4	0/1:67,0,53:4:2:0:0,2,1,1	0/1:150,0,18:8:7:0:1,0,1,6
Locus_2_Transcript_102/4817_Confidence_1.000_Length_404	222	.	T	C	70	PASS	DP=47;VDB=0.128485;SGB=-4.41469;RPB=0.907302;MQB=0.0117026;MQSB=0.99983;BQB=0.819936;MQ0F=0;ICB=0.5;HOB=0.5;AC=2;AN=4;DP4=16,9,4,4;MQ=39	GT:PL:DP:DV:SP:DP4	0/1:54,0,202:12:4:0:5,3,2,2	0/1:83,0,255:21:4:2:11,6,2,2
Locus_2_Transcript_102/4817_Confidence_1.000_Length_404	252	.	C	T	69	PASS	DP=50;VDB=0.484207;SGB=-4.72235;RPB=0.00938142;MQB=0.0396437;MQSB=0.874721;BQB=0.999411;MQ0F=0;ICB=0.5;HOB=0.5;AC=2;AN=4;DP4=20,9,2,7;MQ=39	GT:PL:DP:DV:SP:DP4	0/1:57,0,172:10:4:2:3,3,1,3	0/1:78,0,255:28:5:14:17,6,1,4
Locus_2_Transcript_104/4817_Confidence_1.000_Length_279	55	.	T	C	138	PASS	DP=16;VDB=0.0157312;SGB=-0.561957;RPB=1;MQB=1;BQB=1;MQ0F=0.0625;AC=4;AN=4;DP4=1,0,12,0;MQ=32	GT:PL:DP:DV:SP:DP4	1/1:72,6,0:2:2:0:0,0,2,0	1/1:124,0,4:11:10:0:1,0,10,0
Locus_2_Transcript_104/4817_Confidence_1.000_Length_279	127	.	A	G	105	PASS	DP=62;VDB=0.855219;SGB=-5.6418;RPB=0.986928;MQB=0.0877131;MQSB=0.158422;BQB=0.553963;MQ0F=0.016129;ICB=0.5;HOB=0.5;AC=2;AN=4;DP4=22,3,12,0;MQ=34	GT:PL:DP:DV:SP:DP4	0/1:19,0,110:6:1:0:5,0,1,0	0/1:151,0,220:31:11:3:17,3,11,0
Locus_2_Transcript_104/4817_Confidence_1.000_Length_279	131	.	C	T	168	PASS	DP=59;VDB=0.82638;SGB=-6.87115;RPB=0.843966;MQB=0.851435;MQSB=0.56335;BQB=0.958476;MQ0F=0.0169492;ICB=0.5;HOB=0.5;AC=2;AN=4;DP4=17,4,14,2;MQ=34	GT:PL:DP:DV:SP:DP4	0/1:55,0,88:6:3:0:3,0,3,0	0/1:177,0,253:31:13:0:14,4,11,2
Locus_2_Transcript_108/4817_Confidence_1.000_Length_375	62	.	C	T	64	PASS	DP=16;VDB=0.456466;SGB=-0.949327;RPB=0.636364;MQB=0.636364;BQB=0.909091;MQ0F=0.5;AC=4;AN=4;DP4=2,0,11,0;MQ=13	GT:PL:DP:DV:SP:DP4	1/1:63,3,0:5:3:0:2,0,3,0	1/1:56,24,0:8:8:0:0,0,8,0
Locus_2_Transcript_119/4817_Confidence_1.000_Length_236	50	.	T	C	61	PASS	DP=77;VDB=1.03648e-06;SGB=-1.37635;RPB=0.983582;MQB=0.0896137;BQB=0.566711;MQ0F=0.25974;ICB=0.3;HOB=0.125;AC=3;AN=4;DP4=10,0,37,0;MQ=14	GT:PL:DP:DV:SP:DP4	1/1:79,12,0:20:16:0:4,0,16,0	0/1:46,0,63:27:21:0:6,0,21,0
Locus_2_Transcript_119/4817_Confidence_1.000_Length_236	154	.	G	A	146	PASS	DP=88;VDB=2.62141e-05;SGB=-1.38177;RPB=0.212443;MQB=0.0723998;MQSB=0.550331;BQB=0.280666;MQ0F=0.159091;ICB=0.3;HOB=0.125;AC=3;AN=4;DP4=2,6,26,25;MQ=12	GT:PL:DP:DV:SP:DP4	1/1:132,49,0:34:30:10:0,4,16,14	0/1:78,0,60:25:21:0:2,2,10,11
Locus_2_Transcript_121/4817_Confidence_1.000_Length_545	344	.	T	G	76	PASS	DP=35;VDB=0.000489609;SGB=-5.95055;RPB=0.0308438;MQB=0.973056;MQSB=0.337241;BQB=0.163485;MQ0F=0;ICB=0.3;HOB=0.125;AC=3;AN=4;DP4=4,5,12,1;MQ=26	GT:PL:DP:DV:SP:DP4	1/1:90,9,0:10:9:0:0,1,9,0	0/1:50,0,135:12:4:2:4,4,3,1
Locus_2_Transcript_121/4817_Confidence_1.000_Length_545	367	.	G	T	110	PASS	DP=32;VDB=0.00121322;SGB=-5.95055;RPB=0.204031;MQB=0.425373;MQSB=0.804377;BQB=0.00344402;MQ0F=0;ICB=0.3;HOB=0.125;AC=3;AN=4;DP4=2,5,12,1;MQ=27	GT:PL:DP:DV:SP:DP4	1/1:105,27,0:9:9:0:0,0,9,0	0/1:69,0,137:11:4:6:2,5,3,1
Locus_2_Transcript_121/4817_Confidence_1.000_Length_545	418	.	T	G	123	PASS	DP=20;VDB=0.000294404;SGB=-0.949327;RPB=0.0330712;MQB=0.0194554;MQSB=0.431591;BQB=0.77274;MQ0F=0;ICB=0.3;HOB=0.125;AC=3;AN=4;DP4=3,1,3,8;MQ=29	GT:PL:DP:DV:SP:DP4	1/1:124,24,0:8:8:0:0,0,1,7	0/1:63,0,119:7:3:0:3,1,2,1
Locus_2_Transcript_124/4817_Confidence_1.000_Length_225	106	.	G	T	97	PASS	DP=81;VDB=0.559446;SGB=-5.64284;RPB=0.828949;MQB=0.911084;MQSB=1;BQB=0.99758;MQ0F=0;ICB=0.3;HOB=0.125;AC=1;AN=4;DP4=29,1,12,0;MQ=37	GT:PL:DP:DV:SP:DP4	0/0:0,6,199:19:2:0:16,1,2,0	0/1:160,0,182:23:10:0:13,0,10,0
Locus_2_Transcript_124/4817_Confidence_1.000_Length_225	201	.	G	C	340	PASS	DP=34;VDB=1.46942e-10;SGB=-1.35517;RPB=0.913904;MQB=0.953497;MQSB=0.476725;BQB=0.3611;MQ0F=0;ICB=0.3;HOB=0.125;AC=3;AN=4;DP4=2,1,5,19;MQ=38	GT:PL:DP:DV:SP:DP4	1/1:215,0,0:15:13:4:1,1,2,11	0/1:236,49,62:12:11:0:1,0,3,8
Locus_2_Transcript_131/4817_Confidence_1.000_Length_201	136	.	G	C	62	PASS	DP=25;VDB=0.0327841;SGB=-4.10417;RPB=0.640197;MQB=0.0857407;MQSB=0.460355;BQB=0.834543;MQ0F=0;ICB=0.5;HOB=0.5;AC=2;AN=4;DP4=5,2,6,1;MQ=33	GT:PL:DP:DV:SP:DP4	0/1:21,0,167:8:2:0:4,2,2,0	0/1:104,0,5:6:5:0:1,0,4,1
Locus_2_Transcript_131/4817_Confidence_1.000_Length_201	141	.	C	T	67	PASS	DP=23;VDB=0.00911604;SGB=-4.10417;RPB=0.834543;MQB=0.0857407;MQSB=0.278037;BQB=0.497296;MQ0F=0;ICB=0.5;HOB=0.5;AC=2;AN=4;DP4=4,3,5,2;MQ=33	GT:PL:DP:DV:SP:DP4	0/1:21,0,163:8:2:3:3,3,2,0	0/1:109,0,5:6:5:0:1,0,3,2
Locus_2_Transcript_132/4817_Confidence_1.000_Length_2268	44	.	G	A	79	PASS	DP=75;VDB=0.000782623;SGB=-6.56403;RPB=0.787968;MQB=0.186473;BQB=0.713392;MQ0F=0.0266667;ICB=0.3;HOB=0.125;AC=1;AN=4;DP4=47,0,15,0;MQ=36	GT:PL:DP:DV:SP:DP4	0/0:0,12,154:27:2:0:25,0,2,0	0/1:143,0,155:35:13:0:22,0,13,0
Locus_2_Transcript_132/4817_Confidence_1.000_Length_2268	93	.	A	G	182	PASS	DP=135;VDB=0.00373254;SGB=-18.8386;RPB=0.444018;MQB=0.845026;BQB=0.191532;MQ0F=0.0148148;ICB=0.3;HOB=0.125;AC=3;AN=4;DP4=36,0,55,0;MQ=38	GT:PL:DP:DV:SP:DP4	0/1:14,0,146:40:4:0:36,0,4,0	1/1:233,154,0:51:51:0:0,0,51,0
Locus_2_Transcript_132/4817_Confidence_1.000_Length_2268	123	.	C	T	209	PASS	DP=136;VDB=0.0105182;SGB=-11.4741;RPB=0.987355;MQB=0.176923;MQSB=8.69103e-06;BQB=0.87019;MQ0F=0;ICB=0.5;HOB=0.5;AC=2;AN=4;DP4=53,3,23,8;MQ=39	GT:PL:DP:DV:SP:DP4	0/1:19,0,208:38:4:0:32,2,4,0	0/1:255,0,219:49:27:15:21,1,19,8
Locus_2_Transcript_132/4817_Confidence_1.000_Length_2268	472	.	T	C	190	PASS	DP=81;VDB=0.292036;SGB=13.0002;RPB=0.996717;MQB=0.952829;MQSB=0.985221;BQB=0.663631;MQ0F=0;ICB=0.3;HOB=0.125;AC=1;AN=4;DP4=25,21,15,6;MQ=41	GT:PL:DP:DV:SP:DP4	0/1:255,0,42:24:21:0:2,1,15,6	0/0:0,129,255:43:0:0:23,20,0,0
Locus_2_Transcript_132/4817_Confidence_1.000_Length_2268	847	.	C	G	190	PASS	DP=94;VDB=0.396426;SGB=11.6141;RPB=0.144347;MQB=1;MQSB=1;BQB=0.935699;MQ0F=0;ICB=0.3;HOB=0.125;AC=1;AN=4;DP4=32,22,11,8;MQ=42	GT:PL:DP:DV:SP:DP4	0/0:0,45,255:15:0:0:5,10,0,0	0/1:255,0,255:58:19:3:27,12,11,8
Locus_2_Transcript_132/4817_Confidence_1.000_Length_2268	848	.	T	C	190	PASS	DP=90;VDB=0.425783;SGB=11.6141;RPB=0.04192;MQB=1;MQSB=1;BQB=0.992718;MQ0F=0;ICB=0.3;HOB=0.125;AC=1;AN=4;DP4=32,18,11,8;MQ=42	GT:PL:DP:DV:SP:DP4	0/0:0,36,255:12:0:0:5,7,0,0	0/1:255,0,255:57:19:4:27,11,11,8
Locus_2_Transcript_132/4817_Confidence_1.000_Length_2268	1120	.	G	C	212	PASS	DP=72;VDB=0.972338;SGB=4.64884;RPB=0.986788;MQB=1;MQSB=1;BQB=0.894937;MQ0F=0;ICB=0.3;HOB=0.125;AC=3;AN=4;DP4=12,3,20,22;MQ=42	GT:PL:DP:DV:SP:DP4	0/1:23,0,252:17:2:4:12,3,1,1	1/1:255,120,0:40:40:0:0,0,19,21
Locus_2_Transcript_132/4817_Confidence_1.000_Length_2268	1139	.	T	C	403	PASS	DP=68;VDB=0.974722;SGB=-10.8604;RPB=0.437103;MQB=1;MQSB=1;BQB=0.212484;MQ0F=0;ICB=0.3;HOB=0.125;AC=3;AN=4;DP4=10,14,22,7;MQ=42	GT:PL:DP:DV:SP:DP4	1/1:255,54,0:18:18:0:0,0,15,3	0/1:212,0,255:35:11:5:10,14,7,4
Locus_2_Transcript_132/4817_Confidence_1.000_Length_2268	1366	.	G	A	171	PASS	DP=93;VDB=0.315586;SGB=8.84268;RPB=0.834693;MQB=0.977216;MQSB=0.975272;BQB=0.385244;MQ0F=0;ICB=0.3;HOB=0.125;AC=1;AN=4;DP4=44,11,10,5;MQ=41	GT:PL:DP:DV:SP:DP4	0/0:0,87,255:29:0:0:22,7,0,0	0/1:235,0,255:41:15:6:22,4,10,5
Locus_2_Transcript_132/4817_Confidence_1.000_Length_2268	1653	.	C	T	189	PASS	DP=91;VDB=0.00956559;SGB=14.3863;RPB=0.974704;MQB=1;MQSB=1;BQB=0.974704;MQ0F=0;ICB=0.3;HOB=0.125;AC=1;AN=4;DP4=24,18,12,11;MQ=42	GT:PL:DP:DV:SP:DP4	0/1:255,0,28:26:23:0:2,1,12,11	0/0:0,117,255:39:0:0:22,17,0,0
Locus_2_Transcript_132/4817_Confidence_1.000_Length_2268	1687	.	T	C	391	PASS	DP=89;VDB=0.591254;SGB=-15.77;RPB=0.967416;MQB=1;MQSB=1;BQB=0.614603;MQ0F=0;ICB=0.3;HOB=0.125;AC=3;AN=4;DP4=16,9,18,27;MQ=42	GT:PL:DP:DV:SP:DP4	1/1:255,93,0:31:31:0:0,0,15,16	0/1:200,0,255:39:14:17:16,9,3,11
Locus_2_Transcript_132/4817_Confidence_1.000_Length_2268	1827	.	C	T	190	PASS	DP=121;VDB=0.00443166;SGB=16.4657;RPB=0.00423114;MQB=0.960607;MQSB=0.9937;BQB=0.105296;MQ0F=0;ICB=0.3;HOB=0.125;AC=1;AN=4;DP4=46,16,18,8;MQ=41	GT:PL:DP:DV:SP:DP4	0/1:255,0,63:32:26:0:4,2,18,8	0/0:0,169,255:56:0:0:42,14,0,0
Locus_2_Transcript_132/4817_Confidence_1.000_Length_2268	2004	.	C	T	215	PASS	DP=85;VDB=0.656571;SGB=-9.01926;RPB=0.445473;MQB=0.988096;MQSB=0.988096;BQB=0.161086;MQ0F=0;ICB=0.5;HOB=0.5;AC=2;AN=4;DP4=32,11,11,12;MQ=41	GT:PL:DP:DV:SP:DP4	0/1:25,0,255:32:4:3:21,7,2,2	0/1:255,0,248:34:19:8:11,4,9,10
Locus_2_Transcript_132/4817_Confidence_1.000_Length_2268	2134	.	C	T	186	PASS	DP=48;VDB=0.509931;SGB=11.6141;RPB=0.9768;MQB=0.875987;MQSB=0.783564;BQB=0.930636;MQ0F=0;ICB=0.5;HOB=0.5;AC=2;AN=4;DP4=8,13,7,12;MQ=41	GT:PL:DP:DV:SP:DP4	1/1:255,18,0:20:19:0:1,0,7,12	0/0:0,60,255:20:0:0:7,13,0,0
Locus_2_Transcript_134/4817_Confidence_1.000_Length_202	124	.	T	G	121	PASS	DP=70;VDB=0.00101604;SGB=5.38303;RPB=0.598557;MQB=0.984475;MQSB=0.0120159;BQB=0.978384;MQ0F=0;ICB=0.3;HOB=0.125;AC=1;AN=4;DP4=24,5,7,3;MQ=36	GT:PL:DP:DV:SP:DP4	0/0:0,66,255:22:0:0:19,3,0,0	0/1:185,0,150:17:10:0:5,2,7,3
Locus_2_Transcript_134/4817_Confidence_1.000_Length_202	154	.	C	T	128	PASS	DP=49;VDB=0.000197104;SGB=4.00342;RPB=0.524058;MQB=0.96042;MQSB=0.295808;BQB=0.524058;MQ0F=0;ICB=0.3;HOB=0.125;AC=1;AN=4;DP4=10,16,5,3;MQ=38	GT:PL:DP:DV:SP:DP4	0/0:0,63,255:21:0:0:10,11,0,0	0/1:192,0,89:13:8:11:0,5,5,3
Locus_2_Transcript_136/4817_Confidence_1.000_Length_203	116	.	G	A	104	PASS	DP=85;VDB=0.0837689;SGB=6.07412;RPB=0.422127;MQB=0.88154;MQSB=0.0199403;BQB=0.230768;MQ0F=0.0117647;ICB=0.3;HOB=0.125;AC=1;AN=4;DP4=30,5,9,2;MQ=31	GT:PL:DP:DV:SP:DP4	0/0:0,78,255:26:0:0:21,5,0,0	0/1:168,0,121:20:11:3:9,0,9,2
Locus_2_Transcript_136/4817_Confidence_1.000_Length_203	127	.	A	G	119	PASS	DP=78;VDB=0.0336882;SGB=6.07412;RPB=0.704523;MQB=0.88154;MQSB=0.435645;BQB=0.986088;MQ0F=0.0128205;ICB=0.3;HOB=0.125;AC=1;AN=4;DP4=25,10,7,4;MQ=31	GT:PL:DP:DV:SP:DP4	0/0:0,78,255:26:0:0:16,10,0,0	0/1:183,0,121:20:11:10:9,0,7,4
Locus_2_Transcript_137/4817_Confidence_1.000_Length_455	138	.	T	G	144	PASS	DP=166;VDB=0.952976;SGB=25.4765;RPB=0.821052;MQB=0.964549;MQSB=0.000294101;BQB=0.979592;MQ0F=0;ICB=0.3;HOB=0.125;AC=1;AN=4;DP4=58,13,37,2;MQ=40	GT:PL:DP:DV:SP:DP4	0/1:209,0,104:47:39:32:3,5,37,2	0/0:0,190,255:63:0:0:55,8,0,0
Locus_2_Transcript_138/4817_Confidence_1.000_Length_250	71	.	T	C	141	PASS	DP=110;VDB=0.0037388;SGB=-11.4741;RPB=0.984163;MQB=0.997072;BQB=0.365258;MQ0F=0.0272727;ICB=0.5;HOB=0.5;AC=2;AN=4;DP4=47,0,31,0;MQ=36	GT:PL:DP:DV:SP:DP4	0/1:27,0,166:28:3:0:25,0,3,0	0/1:178,0,169:50:28:0:22,0,28,0
Locus_2_Transcript_140/4817_Confidence_1.000_Length_480	105	.	A	T	66	PASS	DP=8;VDB=0.145389;SGB=-3.15886;RPB=1;MQB=1;BQB=0.5;MQ0F=0;ICB=0.3;HOB=0.125;AC=3;AN=4;DP4=2,0,4,0;MQ=42	GT:PL:DP:DV:SP:DP4	1/1:97,9,0:3:3:0:0,0,3,0	0/1:33,0,59:3:1:0:2,0,1,0
Locus_2_Transcript_143/4817_Confidence_1.000_Length_512	208	.	G	T	61	PASS	DP=53;VDB=0.000439235;SGB=-5.64284;RPB=0.000892768;MQB=0.766096;MQSB=0.0168538;BQB=0.170243;MQ0F=0.0377358;ICB=0.3;HOB=0.125;AC=1;AN=4;DP4=19,6,7,5;MQ=30	GT:PL:DP:DV:SP:DP4	0/0:0,4,191:16:2:13:12,2,0,2	0/1:124,0,195:21:10:0:7,4,7,3
Locus_2_Transcript_144/4817_Confidence_1.000_Length_699	303	.	G	A	149	PASS	DP=107;VDB=0.00142899;SGB=0.445557;RPB=0.892133;MQB=3.52154e-05;MQSB=0.698981;BQB=0.448045;MQ0F=0.233645;ICB=0.3;HOB=0.125;AC=3;AN=4;DP4=8,4,56,10;MQ=16	GT:PL:DP:DV:SP:DP4	1/1:106,45,0:15:15:0:0,0,13,2	0/1:107,0,121:63:51:7:8,4,43,8
Locus_2_Transcript_149/4817_Confidence_1.000_Length_473	103	.	T	G	73	PASS	DP=112;VDB=0.124186;SGB=-16.6906;RPB=0.969769;MQB=8.48713e-09;MQSB=1;BQB=0.678795;MQ0F=0.0625;ICB=0.5;HOB=0.5;AC=2;AN=4;DP4=21,0,47,1;MQ=22	GT:PL:DP:DV:SP:DP4	0/1:55,0,70:21:16:0:5,0,16,0	0/1:81,0,158:48:32:0:16,0,31,1
Locus_2_Transcript_149/4817_Confidence_1.000_Length_473	170	.	A	G	165	PASS	DP=115;VDB=0.00205325;SGB=-17.3043;RPB=0.52801;MQB=1.549e-09;MQSB=0.851663;BQB=0.992218;MQ0F=0.0434783;ICB=0.5;HOB=0.5;AC=2;AN=4;DP4=21,7,26,24;MQ=23	GT:PL:DP:DV:SP:DP4	0/1:89,0,135:26:17:2:7,2,11,6	0/1:139,0,255:52:33:11:14,5,15,18
Locus_2_Transcript_149/4817_Confidence_1.000_Length_473	184	.	C	T	106	PASS	DP=89;VDB=0.00342626;SGB=-11.4741;RPB=0.999584;MQB=1.68501e-05;MQSB=0.978866;BQB=0.345937;MQ0F=0.0449438;ICB=0.5;HOB=0.5;AC=2;AN=4;DP4=19,11,18,13;MQ=23	GT:PL:DP:DV:SP:DP4	0/1:81,0,117:18:11:6:7,0,8,3	0/1:89,0,255:43:20:0:12,11,10,10
Locus_2_Transcript_162/4817_Confidence_1.000_Length_249	189	.	G	A	94	PASS	DP=56;VDB=0.0019485;SGB=-0.759276;RPB=0.115419;MQB=0.0569076;MQSB=0.557583;BQB=0.893597;MQ0F=0.0714286;ICB=0.5;HOB=0.5;AC=2;AN=4;DP4=3,3,18,10;MQ=15	GT:PL:DP:DV:SP:DP4	0/1:85,0,8:8:7:0:0,1,6,1	0/1:74,0,42:26:21:0:3,2,12,9
Locus_2_Transcript_165/4817_Confidence_1.000_Length_239	86	.	T	C	72	PASS	DP=16;VDB=0.00276612;SGB=-1.11282;RPB=1;MQB=1;BQB=1;MQ0F=0;ICB=0.3;HOB=0.125;AC=3;AN=4;DP4=1,0,8,0;MQ=24	GT:PL:DP:DV:SP:DP4	1/1:88,12,0:4:4:0:0,0,4,0	0/1:48,0,22:5:4:0:1,0,4,0
Locus_2_Transcript_165/4817_Confidence_1.000_Length_239	93	.	T	C	82	PASS	DP=18;VDB=0.158012;SGB=-1.13755;RPB=1;MQB=1;BQB=1;MQ0F=0;ICB=0.3;HOB=0.125;AC=3;AN=4;DP4=1,0,9,0;MQ=24	GT:PL:DP:DV:SP:DP4	1/1:98,15,0:5:5:0:0,0,5,0	0/1:48,0,22:5:4:0:1,0,4,0
Locus_2_Transcript_172/4817_Confidence_1.000_Length_453	61	.	A	G	87	PASS	DP=30;VDB=0.00239822;SGB=-1.30935;RPB=0.573029;MQB=0.0775511;BQB=0.14654;MQ0F=0.133333;ICB=0.3;HOB=0.125;AC=3;AN=4;DP4=3,0,18,0;MQ=19	GT:PL:DP:DV:SP:DP4	1/1:94,30,0:10:10:0:0,0,10,0	0/1:57,0,63:11:8:0:3,0,8,0
Locus_2_Transcript_172/4817_Confidence_1.000_Length_453	121	.	T	G	118	PASS	DP=59;VDB=0.00105957;SGB=-1.3772;RPB=0.925075;MQB=0.0650722;MQSB=0.339474;BQB=0.999539;MQ0F=0.169492;ICB=0.3;HOB=0.125;AC=3;AN=4;DP4=2,1,28,3;MQ=16	GT:PL:DP:DV:SP:DP4	1/1:110,48,0:16:16:0:0,0,16,0	0/1:73,0,48:18:15:0:2,1,12,3
Locus_2_Transcript_172/4817_Confidence_1.000_Length_453	160	.	A	C	103	PASS	DP=50;VDB=0.363991;SGB=-1.37269;RPB=0.952765;MQB=0.00570355;MQSB=0.663311;BQB=0.796801;MQ0F=0.24;ICB=0.5;HOB=0.5;AC=2;AN=4;DP4=4,0,20,11;MQ=15	GT:PL:DP:DV:SP:DP4	0/1:94,0,12:19:17:0:2,0,11,6	0/1:74,0,30:16:14:0:2,0,9,5
Locus_2_Transcript_172/4817_Confidence_1.000_Length_453	168	.	A	G	92	PASS	DP=44;VDB=0.112489;SGB=-1.36519;RPB=0.613283;MQB=0.00584098;MQSB=0.88692;BQB=0.912627;MQ0F=0.25;ICB=0.5;HOB=0.5;AC=2;AN=4;DP4=4,0,16,14;MQ=15	GT:PL:DP:DV:SP:DP4	0/1:91,0,4:19:17:3:2,0,9,8	0/1:64,0,33:15:13:3:2,0,7,6
Locus_2_Transcript_188/4817_Confidence_1.000_Length_478	166	.	G	A	177	PASS	DP=52;VDB=0.902512;SGB=7.4578;RPB=0.811592;MQB=0.726149;MQSB=0.429062;BQB=0.662356;MQ0F=0;ICB=0.3;HOB=0.125;AC=1;AN=4;DP4=13,12,9,4;MQ=40	GT:PL:DP:DV:SP:DP4	0/1:241,0,239:25:13:0:8,4,9,4	0/0:0,39,255:13:0:0:5,8,0,0
Locus_2_Transcript_193/4817_Confidence_1.000_Length_1029	686	.	T	G	70	PASS	DP=25;VDB=0.12386;SGB=3.31571;RPB=0.516786;MQB=1;MQSB=1;BQB=0.707404;MQ0F=0;ICB=0.3;HOB=0.125;AC=1;AN=4;DP4=12,1,7,0;MQ=42	GT:PL:DP:DV:SP:DP4	0/1:135,0,13:8:7:0:1,0,7,0	0/0:0,36,226:12:0:0:11,1,0,0
Locus_2_Transcript_196/4817_Confidence_1.000_Length_751	559	.	A	C	90	PASS	DP=29;VDB=0.530999;SGB=2.63044;RPB=0.587071;MQB=1;MQSB=1;BQB=0.762053;MQ0F=0;ICB=0.3;HOB=0.125;AC=1;AN=4;DP4=9,7,4,2;MQ=42	GT:PL:DP:DV:SP:DP4	0/1:154,0,144:11:6:0:3,2,4,2	0/0:0,33,255:11:0:0:6,5,0,0
Locus_2_Transcript_197/4817_Confidence_1.000_Length_1228	75	.	C	G	87	PASS	DP=33;VDB=0.00552276;SGB=3.31571;RPB=0.211656;MQB=0.852991;BQB=0.253587;MQ0F=0;ICB=0.5;HOB=0.5;AC=2;AN=4;DP4=15,0,7,0;MQ=38	GT:PL:DP:DV:SP:DP4	1/1:156,21,0:7:7:0:0,0,7,0	0/0:0,45,198:15:0:0:15,0,0,0
Locus_2_Transcript_197/4817_Confidence_1.000_Length_1228	227	.	T	C	111	PASS	DP=36;VDB=0.226058;SGB=2.63044;RPB=0.999664;MQB=0.82403;MQSB=0.963674;BQB=0.552809;MQ0F=0;ICB=0.5;HOB=0.5;AC=2;AN=4;DP4=13,11,4,2;MQ=41	GT:PL:DP:DV:SP:DP4	1/1:180,18,0:6:6:0:0,0,4,2	0/0:0,72,255:24:0:0:13,11,0,0
Locus_2_Transcript_199/4817_Confidence_1.000_Length_336	282	.	A	T	76	PASS	DP=62;VDB=0.000664084;SGB=-4.41425;RPB=0.895309;MQB=0.937378;MQSB=0.995703;BQB=0.0316365;MQ0F=0;ICB=0.5;HOB=0.5;AC=2;AN=4;DP4=7,33,6,2;MQ=38	GT:PL:DP:DV:SP:DP4	0/1:70,0,154:12:3:13:2,7,3,0	0/1:72,0,255:36:5:12:5,26,3,2
Locus_2_Transcript_201/4817_Confidence_1.000_Length_674	165	.	G	A	449	PASS	DP=157;VDB=0.0915124;SGB=-0.677417;RPB=0.116154;MQB=0.0266718;MQSB=0.0163011;BQB=0.999806;MQ0F=0;AC=4;AN=4;DP4=5,0,73,42;MQ=30	GT:PL:DP:DV:SP:DP4	1/1:249,93,0:31:31:0:0,0,26,5	1/1:255,110,0:89:84:11:5,0,47,37
Locus_2_Transcript_201/4817_Confidence_1.000_Length_674	454	.	T	C	112	PASS	DP=179;VDB=0.0319587;SGB=13.0002;RPB=0.982171;MQB=0.950061;MQSB=0.0650839;BQB=0.783001;MQ0F=0;ICB=0.3;HOB=0.125;AC=1;AN=4;DP4=62,55,12,9;MQ=41	GT:PL:DP:DV:SP:DP4	0/0:0,99,255:33:0:0:18,15,0,0	0/1:178,0,255:105:21:1:44,40,12,9
Locus_2_Transcript_201/4817_Confidence_1.000_Length_674	544	.	T	C	392	PASS	DP=146;VDB=0.00189795;SGB=-20.066;RPB=0.968073;MQB=0.51748;MQSB=0.000176799;BQB=0.884911;MQ0F=0;ICB=0.5;HOB=0.5;AC=2;AN=4;DP4=24,27,22,37;MQ=38	GT:PL:DP:DV:SP:DP4	0/1:200,0,255:31:12:5:12,7,5,7	0/1:255,0,255:79:47:0:12,20,17,30
Locus_2_Transcript_201/4817_Confidence_1.000_Length_674	639	.	C	A	82	PASS	DP=44;VDB=0.00167489;SGB=-4.72185;RPB=0.999744;MQB=0.974723;MQSB=0.000248918;BQB=0.983748;MQ0F=0;ICB=0.5;HOB=0.5;AC=2;AN=4;DP4=9,12,5,4;MQ=30	GT:PL:DP:DV:SP:DP4	0/1:54,0,116:8:3:3:1,4,2,1	0/1:93,0,214:22:6:0:8,8,3,3
Locus_2_Transcript_202/4817_Confidence_1.000_Length_1732	440	.	T	C	94	PASS	DP=165;VDB=2.28513e-05;SGB=-8.71242;RPB=0.452645;MQB=0.997415;MQSB=0.995658;BQB=0.953848;MQ0F=0;ICB=0.3;HOB=0.125;AC=1;AN=4;DP4=70,32,21,1;MQ=41	GT:PL:DP:DV:SP:DP4	0/1:158,0,255:37:14:9:18,5,14,0	0/0:0,24,255:87:8:4:52,27,7,1
Locus_2_Transcript_202/4817_Confidence_1.000_Length_1732	719	.	A	C	208	PASS	DP=125;VDB=0.145215;SGB=-9.01927;RPB=0.989504;MQB=0.94907;MQSB=0.827301;BQB=0.641737;MQ0F=0;ICB=0.5;HOB=0.5;AC=2;AN=4;DP4=49,17,21,2;MQ=41	GT:PL:DP:DV:SP:DP4	0/1:158,0,255:31:12:9:14,5,12,0	0/1:115,0,255:58:11:0:35,12,9,2
Locus_2_Transcript_202/4817_Confidence_1.000_Length_1732	1213	.	T	C	202	PASS	DP=67;VDB=0.450857;SGB=-6.25745;RPB=0.300075;MQB=1;MQSB=1;BQB=0.587587;MQ0F=0;ICB=0.5;HOB=0.5;AC=2;AN=4;DP4=22,20,8,6;MQ=42	GT:PL:DP:DV:SP:DP4	0/1:105,0,193:14:4:0:6,4,2,2	0/1:162,0,255:42:10:1:16,16,6,4
Locus_2_Transcript_202/4817_Confidence_1.000_Length_1732	1285	.	C	T	323	PASS	DP=94;VDB=0.101324;SGB=-9.01927;RPB=0.91396;MQB=1;MQSB=1;BQB=0.177615;MQ0F=0;ICB=0.5;HOB=0.5;AC=2;AN=4;DP4=29,29,15,8;MQ=42	GT:PL:DP:DV:SP:DP4	0/1:198,0,208:19:9:8:4,6,7,2	0/1:189,0,255:62:14:1:25,23,8,6
Locus_2_Transcript_203/4817_Confidence_1.000_Length_1580	173	.	A	C	96	PASS	DP=128;VDB=0.300852;SGB=-6.25755;RPB=0.920275;MQB=0.988487;MQSB=0.869223;BQB=0.793911;MQ0F=0;ICB=0.5;HOB=0.5;AC=2;AN=4;DP4=54,24,9,5;MQ=41	GT:PL:DP:DV:SP:DP4	0/1:132,0,255:34:8:0:16,10,5,3	0/1:33,0,255:58:6:2:38,14,4,2
Locus_2_Transcript_203/4817_Confidence_1.000_Length_1580	598	.	G	A	83	PASS	DP=109;VDB=0.52806;SGB=-5.95067;RPB=0.576105;MQB=0.997221;MQSB=0.985032;BQB=0.700587;MQ0F=0;ICB=0.5;HOB=0.5;AC=2;AN=4;DP4=39,38,8,5;MQ=41	GT:PL:DP:DV:SP:DP4	0/1:130,0,255:30:7:0:11,12,3,4	0/1:21,0,255:60:6:7:28,26,5,1
Locus_2_Transcript_203/4817_Confidence_1.000_Length_1580	860	.	T	G	88	PASS	DP=97;VDB=0.0124389;SGB=-4.40924;RPB=0.0491439;MQB=0.997435;MQSB=0.954374;BQB=0.7931;MQ0F=0;ICB=0.3;HOB=0.125;AC=1;AN=4;DP4=44,20,6,2;MQ=41	GT:PL:DP:DV:SP:DP4	0/1:152,0,176:15:7:0:6,2,5,2	0/0:0,135,255:57:1:0:38,18,1,0
Locus_2_Transcript_203/4817_Confidence_1.000_Length_1580	1317	.	A	C	118	PASS	DP=140;VDB=0.823797;SGB=-7.17814;RPB=0.708307;MQB=1;MQSB=1;BQB=0.878815;MQ0F=0;ICB=0.5;HOB=0.5;AC=2;AN=4;DP4=53,31,12,5;MQ=42	GT:PL:DP:DV:SP:DP4	0/1:122,0,255:23:6:2:9,8,2,4	0/1:63,0,255:78:11:8:44,23,10,1
Locus_2_Transcript_205/4817_Confidence_1.000_Length_228	200	.	A	G	367	PASS	DP=227;VDB=1.15309e-25;SGB=-17.918;RPB=0.966749;MQB=0.925889;MQSB=0.693184;BQB=0.976845;MQ0F=0.0176211;ICB=0.5;HOB=0.5;AC=2;AN=4;DP4=30,100,15,37;MQ=36	GT:PL:DP:DV:SP:DP4	0/1:185,0,255:97:27:3:25,45,7,20	0/1:247,0,255:85:25:18:5,55,8,17
Locus_2_Transcript_207/4817_Confidence_1.000_Length_334	289	.	G	A	85	PASS	DP=33;VDB=0.00320224;SGB=-5.02916;RPB=0.77655;MQB=0.995798;MQSB=0.656718;BQB=0.789116;MQ0F=0;ICB=0.5;HOB=0.5;AC=2;AN=4;DP4=4,15,0,10;MQ=33	GT:PL:DP:DV:SP:DP4	0/1:100,0,101:13:7:0:1,5,0,7	0/1:49,0,228:16:3:0:3,10,0,3
Locus_2_Transcript_210/4817_Confidence_1.000_Length_309	80	.	A	T	86	PASS	DP=10;VDB=0.233642;SGB=-0.802589;RPB=1;MQB=1;BQB=1;MQ0F=0;ICB=0.3;HOB=0.125;AC=3;AN=4;DP4=1,0,5,0;MQ=42	GT:PL:DP:DV:SP:DP4	1/1:42,3,0:1:1:0:0,0,1,0	0/1:109,0,27:5:4:0:1,0,4,0
Locus_2_Transcript_211/4817_Confidence_1.000_Length_366	58	.	C	T	101	PASS	DP=21;VDB=0.0298868;SGB=-5.02822;RPB=0.254902;MQB=0.954207;BQB=0.655816;MQ0F=0;ICB=0.3;HOB=0.125;AC=3;AN=4;DP4=5,0,10,0;MQ=30	GT:PL:DP:DV:SP:DP4	1/1:51,6,0:2:2:0:0,0,2,0	0/1:114,0,79:13:8:0:5,0,8,0
Locus_2_Transcript_211/4817_Confidence_1.000_Length_366	89	.	A	G	102	PASS	DP=29;VDB=0.113529;SGB=-5.64284;RPB=0.233506;MQB=0.695144;BQB=0.128589;MQ0F=0;ICB=0.5;HOB=0.5;AC=2;AN=4;DP4=9,0,12,0;MQ=30	GT:PL:DP:DV:SP:DP4	0/1:59,0,8:3:2:0:1,0,2,0	0/1:107,0,108:18:10:0:8,0,10,0
Locus_2_Transcript_211/4817_Confidence_1.000_Length_366	316	.	T	A	71	PASS	DP=27;VDB=0.00174423;SGB=-5.02916;RPB=0.393241;MQB=0.532719;MQSB=0.457304;BQB=0.562035;MQ0F=0.222222;ICB=0.5;HOB=0.5;AC=2;AN=4;DP4=5,2,4,6;MQ=21	GT:PL:DP:DV:SP:DP4	0/1:51,0,82:7:3:3:3,1,1,2	0/1:84,0,18:10:7:0:2,1,3,4
Locus_2_Transcript_216/4817_Confidence_1.000_Length_389	69	.	T	C	71	PASS	DP=76;VDB=0.00244028;SGB=-11.4741;RPB=0.0284932;MQB=0.0374143;BQB=0.983169;MQ0F=0.105263;ICB=0.5;HOB=0.5;AC=2;AN=4;DP4=26,0,31,0;MQ=18	GT:PL:DP:DV:SP:DP4	0/1:60,0,39:11:6:0:5,0,6,0	0/1:74,0,126:46:25:0:21,0,25,0
Locus_2_Transcript_216/4817_Confidence_1.000_Length_389	98	.	G	T	149	PASS	DP=125;VDB=0.296066;SGB=-14.8495;RPB=0.279421;MQB=0.758662;BQB=0.119859;MQ0F=0.064;ICB=0.5;HOB=0.5;AC=2;AN=4;DP4=45,0,42,0;MQ=20	GT:PL:DP:DV:SP:DP4	0/1:108,0,64:22:11:0:11,0,11,0	0/1:104,0,136:65:31:0:34,0,31,0
Locus_2_Transcript_216/4817_Confidence_1.000_Length_389	127	.	T	A	140	PASS	DP=170;VDB=0.777816;SGB=-0.904504;RPB=0.547263;MQB=3.75872e-06;MQSB=0.298558;BQB=0.269077;MQ0F=0.0470588;ICB=0.3;HOB=0.125;AC=3;AN=4;DP4=13,5,92,6;MQ=20	GT:PL:DP:DV:SP:DP4	1/1:134,24,0:30:27:30:0,3,26,1	0/1:70,0,56:86:71:2:13,2,66,5
Locus_2_Transcript_216/4817_Confidence_1.000_Length_389	170	.	C	T	251	PASS	DP=197;VDB=0.0113485;SGB=-23.4414;RPB=0.876729;MQB=0.672142;MQSB=0.954798;BQB=0.060488;MQ0F=0.0456853;ICB=0.5;HOB=0.5;AC=2;AN=4;DP4=39,23,58,12;MQ=20	GT:PL:DP:DV:SP:DP4	0/1:134,0,74:34:22:9:9,3,21,1	0/1:181,0,255:98:48:11:30,20,37,11
Locus_2_Transcript_216/4817_Confidence_1.000_Length_389	222	.	G	C	96	PASS	DP=158;VDB=0.0412182;SGB=-11.7809;RPB=0.711586;MQB=0.892527;MQSB=0.257888;BQB=0.977711;MQ0F=0.0443038;ICB=0.5;HOB=0.5;AC=2;AN=4;DP4=45,28,20,12;MQ=20	GT:PL:DP:DV:SP:DP4	0/1:59,0,136:29:11:21:7,11,10,1	0/1:102,0,255:76:21:10:38,17,10,11
Locus_2_Transcript_216/4817_Confidence_1.000_Length_389	226	.	A	G	228	PASS	DP=149;VDB=0.0177457;SGB=-23.7482;RPB=0.969985;MQB=0.00309564;MQSB=0.503822;BQB=0.995136;MQ0F=0.0402685;ICB=0.5;HOB=0.5;AC=2;AN=4;DP4=18,11,37,34;MQ=19	GT:PL:DP:DV:SP:DP4	0/1:124,0,29:24:17:0:4,3,9,8	0/1:168,0,225:76:54:3:14,8,28,26
Locus_2_Transcript_216/4817_Confidence_1.000_Length_389	238	.	C	G	111	PASS	DP=131;VDB=0.012788;SGB=-19.1454;RPB=0.376172;MQB=0.000211079;MQSB=0.106267;BQB=0.961231;MQ0F=0.0458015;ICB=0.5;HOB=0.5;AC=2;AN=4;DP4=19,19,24,32;MQ=19	GT:PL:DP:DV:SP:DP4	0/1:41,0,86:22:10:15:9,3,2,8	0/1:134,0,255:72:46:3:10,16,22,24
Locus_2_Transcript_216/4817_Confidence_1.000_Length_389	254	.	G	T	202	PASS	DP=106;VDB=0.000686072;SGB=-1.12178;RPB=0.999256;MQB=8.09105e-06;MQSB=0.692927;BQB=0.999483;MQ0F=0.0471698;ICB=0.3;HOB=0.125;AC=3;AN=4;DP4=7,8,23,39;MQ=18	GT:PL:DP:DV:SP:DP4	1/1:139,41,0:19:18:0:1,0,6,12	0/1:127,0,175:58:44:0:6,8,17,27
Locus_2_Transcript_218/4817_Confidence_1.000_Length_512	203	.	A	G	99	PASS	DP=37;VDB=0.153811;SGB=-4.41269;RPB=0.0316094;MQB=0.880529;MQSB=1;BQB=0.371571;MQ0F=0;ICB=0.5;HOB=0.5;AC=2;AN=4;DP4=18,1,8,0;MQ=41	GT:PL:DP:DV:SP:DP4	0/1:53,0,53:4:2:0:2,0,2,0	0/1:110,0,207:23:6:0:16,1,6,0
Locus_2_Transcript_219/4817_Confidence_1.000_Length_281	75	.	G	A	280	PASS	DP=570;VDB=1.07094e-09;SGB=-52.8992;RPB=0.984702;MQB=0.985105;MQSB=0.326437;BQB=0.338921;MQ0F=0.00350877;ICB=0.5;HOB=0.5;AC=2;AN=4;DP4=271,0,164,2;MQ=38	GT:PL:DP:DV:SP:DP4	0/1:211,0,235:284:118:0:166,0,117,1	0/1:133,0,176:153:48:0:105,0,47,1
Locus_2_Transcript_219/4817_Confidence_1.000_Length_281	236	.	T	G	408	PASS	DP=427;VDB=3.47514e-29;SGB=-42.4662;RPB=0.522746;MQB=0.460202;MQSB=0.749665;BQB=0.929129;MQ0F=0.00936768;ICB=0.5;HOB=0.5;AC=2;AN=4;DP4=49,173,20,112;MQ=38	GT:PL:DP:DV:SP:DP4	0/1:255,0,255:221:91:8:30,100,14,77	0/1:217,0,255:133:41:3:19,73,6,35
Locus_2_Transcript_219/4817_Confidence_1.000_Length_281	268	.	C	A	137	PASS	DP=138;VDB=1.82568e-14;SGB=-12.0878;RPB=0.960988;MQB=0.915489;MQSB=0.0032472;BQB=0.30695;MQ0F=0.0289855;ICB=0.5;HOB=0.5;AC=2;AN=4;DP4=12,75,4,29;MQ=36	GT:PL:DP:DV:SP:DP4	0/1:107,0,198:78:24:4:3,51,3,21	0/1:96,0,255:42:9:4:9,24,1,8
Locus_2_Transcript_220/4817_Confidence_1.000_Length_200	42	.	A	G	136	PASS	DP=83;VDB=1.26723e-21;SGB=-1.38611;RPB=0.115668;MQB=0.0799316;BQB=0.832906;MQ0F=0.0481928;AC=4;AN=4;DP4=5,0,56,0;MQ=20	GT:PL:DP:DV:SP:DP4	1/1:85,32,0:30:28:0:2,0,28,0	1/1:106,23,0:31:28:0:3,0,28,0
Locus_2_Transcript_220/4817_Confidence_1.000_Length_200	50	.	G	C	101	PASS	DP=96;VDB=2.91623e-19;SGB=-1.38595;RPB=0.429271;MQB=0.0597356;BQB=0.969784;MQ0F=0.0416667;ICB=0.3;HOB=0.125;AC=3;AN=4;DP4=8,0,55,0;MQ=19	GT:PL:DP:DV:SP:DP4	0/1:69,0,17:31:26:0:5,0,26,0	1/1:96,12,0:32:29:0:3,0,29,0
Locus_2_Transcript_220/4817_Confidence_1.000_Length_200	61	.	T	C	150	PASS	DP=113;VDB=9.52405e-20;SGB=-1.38619;RPB=0.279104;MQB=0.035674;BQB=0.987064;MQ0F=0.0353982;AC=4;AN=4;DP4=3,0,60,0;MQ=19	GT:PL:DP:DV:SP:DP4	1/1:95,56,0:31:30:0:1,0,30,0	1/1:110,30,0:32:30:0:2,0,30,0
Locus_2_Transcript_220/4817_Confidence_1.000_Length_200	105	.	A	G	104	PASS	DP=142;VDB=2.65924e-10;SGB=-1.38622;RPB=0.0151761;MQB=0.00208036;BQB=0.921963;MQ0F=0.028169;ICB=0.3;HOB=0.125;AC=3;AN=4;DP4=6,0,65,0;MQ=19	GT:PL:DP:DV:SP:DP4	0/1:57,0,13:35:31:0:4,0,31,0	1/1:110,42,0:36:34:0:2,0,34,0
Locus_2_Transcript_220/4817_Confidence_1.000_Length_200	120	.	G	C	191	PASS	DP=131;VDB=9.90052e-06;SGB=-1.3862;RPB=0.0518993;MQB=0.00233641;MQSB=0.827422;BQB=0.544442;MQ0F=0;ICB=0.3;HOB=0.125;AC=3;AN=4;DP4=6,0,55,7;MQ=20	GT:PL:DP:DV:SP:DP4	0/1:107,0,16:34:30:0:4,0,26,4	1/1:148,36,0:34:32:0:2,0,29,3
Locus_2_Transcript_220/4817_Confidence_1.000_Length_200	167	.	A	T	141	PASS	DP=56;VDB=2.39725e-11;SGB=-1.35085;RPB=0.64434;MQB=0.0061491;MQSB=0.318217;BQB=0.71305;MQ0F=0;ICB=0.5;HOB=0.5;AC=2;AN=4;DP4=3,5,5,28;MQ=20	GT:PL:DP:DV:SP:DP4	0/1:93,0,79:18:13:14:3,2,1,12	0/1:113,0,16:23:20:0:0,3,4,16
Locus_2_Transcript_221/4817_Confidence_1.000_Length_205	117	.	T	G	78	PASS	DP=37;VDB=0.0319605;SGB=-1.28266;RPB=0.67032;MQB=0.347757;MQSB=1;BQB=0.904837;MQ0F=0.0810811;ICB=0.5;HOB=0.5;AC=2;AN=4;DP4=3,0,15,1;MQ=18	GT:PL:DP:DV:SP:DP4	0/1:65,0,18:8:7:0:1,0,6,1	0/1:79,0,12:11:9:0:2,0,9,0
Locus_2_Transcript_224/4817_Confidence_1.000_Length_677	192	.	A	G	93	PASS	DP=55;VDB=0.180385;SGB=-1.3796;RPB=0.765085;MQB=0.00166156;MQSB=0.77381;BQB=0.86336;MQ0F=0.109091;ICB=0.3;HOB=0.125;AC=3;AN=4;DP4=11,0,31,2;MQ=22	GT:PL:DP:DV:SP:DP4	0/1:54,0,122:25:16:3:9,0,14,2	1/1:101,2,0:19:17:0:2,0,17,0
Locus_2_Transcript_225/4817_Confidence_1.000_Length_484	196	.	A	C	232	PASS	DP=34;VDB=0.272225;SGB=-6.25756;RPB=0.0209031;MQB=0.812671;MQSB=0.135176;BQB=0.182501;MQ0F=0.0294118;ICB=0.5;HOB=0.5;AC=2;AN=4;DP4=7,3,10,4;MQ=36	GT:PL:DP:DV:SP:DP4	0/1:167,0,179:15:7:2:6,2,4,3	0/1:129,0,19:9:7:4:1,1,6,1
Locus_2_Transcript_225/4817_Confidence_1.000_Length_484	212	.	G	A	222	PASS	DP=36;VDB=0.21862;SGB=-6.25756;RPB=0.146043;MQB=0.98469;MQSB=0.148002;BQB=0.2608;MQ0F=0.0277778;ICB=0.5;HOB=0.5;AC=2;AN=4;DP4=9,1,10,4;MQ=37	GT:PL:DP:DV:SP:DP4	0/1:162,0,129:13:7:7:6,0,4,3	0/1:124,0,70:11:7:0:3,1,6,1
Locus_2_Transcript_225/4817_Confidence_1.000_Length_484	338	.	G	A	137	PASS	DP=25;VDB=0.702766;SGB=-4.72062;RPB=0.826105;MQB=0.991266;MQSB=0.0583028;BQB=0.623919;MQ0F=0.16;ICB=0.5;HOB=0.5;AC=2;AN=4;DP4=5,4,4,5;MQ=34	GT:PL:DP:DV:SP:DP4	0/1:41,0,88:6:2:0:4,0,1,1	0/1:159,0,73:12:7:2:1,4,3,4
Locus_2_Transcript_236/4817_Confidence_1.000_Length_221	112	.	C	T	64	PASS	DP=12;VDB=0.0459681;SGB=1.97062;MQ0F=0;AC=2;AN=2;DP4=0,0,6,0;MQ=29	GT:PL:DP:DV:SP:DP4	./.:0,0,0:0:0:0:0,0,0,0	1/1:119,18,0:6:6:0:0,0,6,0
Locus_2_Transcript_237/4817_Confidence_1.000_Length_400	125	.	G	A	63	PASS	DP=32;VDB=0.393767;SGB=-6.25755;RPB=0.0737239;MQB=0.0226667;MQSB=0.727273;BQB=0.930132;MQ0F=0.0625;ICB=0.5;HOB=0.5;AC=2;AN=4;DP4=9,1,13,1;MQ=27	GT:PL:DP:DV:SP:DP4	0/1:69,0,15:9:8:0:1,0,8,0	0/1:57,0,150:15:6:0:8,1,5,1
Locus_2_Transcript_237/4817_Confidence_1.000_Length_400	131	.	A	G	147	PASS	DP=35;VDB=0.919894;SGB=-1.32441;RPB=0.583645;MQB=0.0458168;MQSB=0.73913;BQB=0.219332;MQ0F=0.0571429;ICB=0.3;HOB=0.125;AC=3;AN=4;DP4=3,1,20,1;MQ=27	GT:PL:DP:DV:SP:DP4	1/1:115,27,0:9:9:0:0,0,9,0	0/1:96,0,99:16:12:3:3,1,11,1
Locus_2_Transcript_237/4817_Confidence_1.000_Length_400	181	.	T	C	94	PASS	DP=33;VDB=0.802788;SGB=-6.87129;RPB=0.132704;MQB=0.00415113;MQSB=0.317569;BQB=0.284674;MQ0F=0;ICB=0.5;HOB=0.5;AC=2;AN=4;DP4=5,4,12,4;MQ=26	GT:PL:DP:DV:SP:DP4	0/1:71,0,15:9:8:0:1,0,8,0	0/1:87,0,152:16:8:0:4,4,4,4
Locus_2_Transcript_237/4817_Confidence_1.000_Length_400	227	.	A	G	64	PASS	DP=27;VDB=0.00414811;SGB=-5.0297;RPB=0.870115;MQB=0.0179608;MQSB=0.870115;BQB=0.613159;MQ0F=0;ICB=0.5;HOB=0.5;AC=2;AN=4;DP4=5,7,7,3;MQ=28	GT:PL:DP:DV:SP:DP4	0/1:64,0,74:9:5:3:1,3,3,2	0/1:64,0,178:13:5:2:4,4,4,1
Locus_2_Transcript_237/4817_Confidence_1.000_Length_400	261	.	T	C	65	PASS	DP=22;VDB=0.996284;SGB=-5.33677;RPB=0.997118;MQB=0.00879329;MQSB=0.909156;BQB=0.791547;MQ0F=0;ICB=0.5;HOB=0.5;AC=2;AN=4;DP4=3,6,2,9;MQ=28	GT:PL:DP:DV:SP:DP4	0/1:55,0,36:7:5:0:0,2,0,5	0/1:73,0,167:13:6:0:3,4,2,4
Locus_2_Transcript_237/4817_Confidence_1.000_Length_400	291	.	G	T	95	PASS	DP=24;VDB=0.564756;SGB=-5.64336;RPB=0.623553;MQB=0.036069;MQSB=0.933727;BQB=0.546855;MQ0F=0;ICB=0.5;HOB=0.5;AC=2;AN=4;DP4=3,4,2,10;MQ=27	GT:PL:DP:DV:SP:DP4	0/1:44,0,48:5:3:0:1,1,0,3	0/1:114,0,105:14:9:2:2,3,2,7
Locus_2_Transcript_241/4817_Confidence_1.000_Length_495	96	.	G	T	295	PASS	DP=58;VDB=0.0389458;SGB=-1.37784;RPB=0.33659;MQB=0.845307;BQB=0.716283;MQ0F=0.12069;ICB=0.3;HOB=0.125;AC=3;AN=4;DP4=3,0,36,0;MQ=32	GT:PL:DP:DV:SP:DP4	1/1:204,60,0:20:20:0:0,0,20,0	0/1:157,0,38:19:16:0:3,0,16,0
Locus_2_Transcript_242/4817_Confidence_1.000_Length_361	206	.	C	A	98	PASS	DP=43;VDB=4.24854e-06;SGB=-1.27013;RPB=0.992218;MQB=0.104579;MQSB=0.824888;BQB=0.621691;MQ0F=0.0465116;ICB=0.3;HOB=0.125;AC=3;AN=4;DP4=4,2,9,16;MQ=15	GT:PL:DP:DV:SP:DP4	1/1:79,20,0:10:9:0:1,0,4,5	0/1:83,0,58:21:16:5:3,2,5,11
Locus_2_Transcript_242/4817_Confidence_1.000_Length_361	233	.	T	A	99	PASS	DP=28;VDB=0.00153304;SGB=-1.18112;RPB=0.738095;MQB=0.952381;MQSB=0.293758;BQB=0.571429;MQ0F=0.0357143;AC=4;AN=4;DP4=1,1,4,17;MQ=14	GT:PL:DP:DV:SP:DP4	1/1:77,21,0:7:7:0:0,0,3,4	1/1:77,18,0:16:14:6:1,1,1,13
Locus_2_Transcript_243/4817_Confidence_1.000_Length_278	110	.	C	G	143	PASS	DP=82;VDB=0.967713;SGB=-6.87128;RPB=0.832908;MQB=0.245772;MQSB=0.712039;BQB=0.10318;MQ0F=0.280488;ICB=0.5;HOB=0.5;AC=2;AN=4;DP4=36,0,13,3;MQ=22	GT:PL:DP:DV:SP:DP4	0/1:64,0,90:23:6:0:17,0,5,1	0/1:143,0,143:29:10:10:19,0,8,2
Locus_2_Transcript_243/4817_Confidence_1.000_Length_278	114	.	T	G	204	PASS	DP=83;VDB=0.478732;SGB=-10.5535;RPB=0.0453641;MQB=0.0938922;MQSB=0.808605;BQB=0.931651;MQ0F=0.277108;ICB=0.5;HOB=0.5;AC=2;AN=4;DP4=24,0,23,5;MQ=22	GT:PL:DP:DV:SP:DP4	0/1:82,0,99:23:11:0:12,0,10,1	0/1:185,0,140:29:17:9:12,0,13,4
Locus_2_Transcript_245/4817_Confidence_1.000_Length_544	296	.	C	A	114	PASS	DP=73;VDB=0.00942031;SGB=-8.7124;RPB=0.194687;MQB=0.000335395;MQSB=0.243907;BQB=0.910844;MQ0F=0.0136986;ICB=0.5;HOB=0.5;AC=2;AN=4;DP4=17,10,14,8;MQ=27	GT:PL:DP:DV:SP:DP4	0/1:30,0,51:6:3:0:2,1,2,1	0/1:148,0,255:43:19:0:15,9,12,7
Locus_2_Transcript_247/4817_Confidence_1.000_Length_568	140	.	A	G	400	PASS	DP=57;VDB=0.0367711;SGB=-11.1672;RPB=0.753853;MQB=0.92174;MQSB=0.890988;BQB=0.638865;MQ0F=0.0175439;ICB=0.3;HOB=0.125;AC=3;AN=4;DP4=11,1,23,7;MQ=35	GT:PL:DP:DV:SP:DP4	1/1:226,12,0:13:12:0:1,0,9,3	0/1:238,0,124:29:18:2:10,1,14,4
Locus_2_Transcript_247/4817_Confidence_1.000_Length_568	163	.	C	T	84	PASS	DP=63;VDB=0.387623;SGB=-5.9492;RPB=0.994996;MQB=0.400798;MQSB=0.542092;BQB=0.936203;MQ0F=0.015873;ICB=0.5;HOB=0.5;AC=2;AN=4;DP4=23,9,13,0;MQ=36	GT:PL:DP:DV:SP:DP4	0/1:6,0,216:12:1:0:7,4,1,0	0/1:143,0,249:33:12:9:16,5,12,0
Locus_2_Transcript_247/4817_Confidence_1.000_Length_568	237	.	A	G	235	PASS	DP=72;VDB=0.0398081;SGB=-9.3261;RPB=0.965993;MQB=0.37525;MQSB=0.605492;BQB=0.981135;MQ0F=0;ICB=0.5;HOB=0.5;AC=2;AN=4;DP4=24,7,14,10;MQ=40	GT:PL:DP:DV:SP:DP4	0/1:44,0,167:10:2:0:7,1,2,0	0/1:255,0,255:45:22:7:17,6,12,10
Locus_2_Transcript_247/4817_Confidence_1.000_Length_568	245	.	T	C	202	PASS	DP=81;VDB=0.308785;SGB=-7.48484;RPB=0.67753;MQB=0.16736;MQSB=0.581056;BQB=0.377939;MQ0F=0;ICB=0.5;HOB=0.5;AC=2;AN=4;DP4=31,9,10,8;MQ=40	GT:PL:DP:DV:SP:DP4	0/1:41,0,206:11:2:0:7,2,2,0	0/1:227,0,255:47:16:10:24,7,8,8
Locus_2_Transcript_247/4817_Confidence_1.000_Length_568	494	.	T	C	61	PASS	DP=23;VDB=0.176043;SGB=1.94933;RPB=0.674676;MQB=0.645028;MQSB=0.157651;BQB=0.732764;MQ0F=0;ICB=0.3;HOB=0.125;AC=1;AN=4;DP4=3,10,2,3;MQ=40	GT:PL:DP:DV:SP:DP4	0/0:0,9,92:3:0:0:3,0,0,0	0/1:125,0,150:15:5:10:0,10,2,3
Locus_2_Transcript_248/4817_Confidence_1.000_Length_354	334	.	T	G	120	PASS	DP=27;VDB=5.28372e-05;SGB=-4.72185;RPB=0.926456;MQB=0.00297301;MQSB=0.714098;BQB=0.756987;MQ0F=0.333333;ICB=0.3;HOB=0.125;AC=3;AN=4;DP4=4,8,3,6;MQ=21	GT:PL:DP:DV:SP:DP4	0/1:103,0,51:16:6:0:4,6,2,4	1/1:80,3,0:5:3:0:0,2,1,2
Locus_2_Transcript_250/4817_Confidence_1.000_Length_565	115	.	G	A	86	PASS	DP=32;VDB=0.385225;SGB=-6.25646;RPB=0.620837;MQB=0.894396;MQSB=1;BQB=0.289361;MQ0F=0.0625;ICB=0.5;HOB=0.5;AC=2;AN=4;DP4=8,1,14,0;MQ=34	GT:PL:DP:DV:SP:DP4	0/1:128,0,61:16:13:0:3,0,13,0	0/1:21,0,146:7:1:0:5,1,1,0
Locus_2_Transcript_250/4817_Confidence_1.000_Length_565	231	.	C	T	118	PASS	DP=24;VDB=0.419626;SGB=-4.41269;RPB=0.825504;MQB=0.0244164;MQSB=0.999167;BQB=0.933295;MQ0F=0;ICB=0.3;HOB=0.125;AC=3;AN=4;DP4=5,6,5,3;MQ=38	GT:PL:DP:DV:SP:DP4	0/1:22,0,244:13:2:0:5,6,1,1	1/1:161,18,0:6:6:0:0,0,4,2
Locus_2_Transcript_251/4817_Confidence_1.000_Length_369	93	.	A	C	259	PASS	DP=92;VDB=0.142184;SGB=-9.32613;RPB=0.477092;MQB=0.811843;MQSB=1;BQB=0.541366;MQ0F=0;ICB=0.5;HOB=0.5;AC=2;AN=4;DP4=41,0,23,1;MQ=39	GT:PL:DP:DV:SP:DP4	0/1:171,0,178:38:14:0:24,0,13,1	0/1:152,0,178:27:10:0:17,0,10,0
Locus_2_Transcript_251/4817_Confidence_1.000_Length_369	118	.	G	C	93	PASS	DP=106;VDB=0.696154;SGB=-5.64336;RPB=0.6279;MQB=0.232253;MQSB=0.0525898;BQB=0.61799;MQ0F=0.0188679;ICB=0.3;HOB=0.125;AC=1;AN=4;DP4=50,5,8,4;MQ=40	GT:PL:DP:DV:SP:DP4	0/1:155,0,255:36:9:8:24,3,6,3	0/0:4,0,214:31:3:6:26,2,2,1
Locus_2_Transcript_251/4817_Confidence_1.000_Length_369	245	.	T	C	112	PASS	DP=43;VDB=0.221848;SGB=-5.0297;RPB=0.997664;MQB=0.00510376;MQSB=0.146977;BQB=0.401549;MQ0F=0.0930233;ICB=0.5;HOB=0.5;AC=2;AN=4;DP4=6,21,1,9;MQ=30	GT:PL:DP:DV:SP:DP4	0/1:67,0,186:23:5:6:6,12,0,5	0/1:109,0,121:14:5:0:0,9,1,4
Locus_2_Transcript_252/4817_Confidence_1.000_Length_259	13	.	A	G	71	PASS	DP=14;VDB=4.4944e-05;SGB=-1.00117;RPB=0.7;MQB=0.6;BQB=0.8;MQ0F=0;AC=4;AN=4;DP4=2,0,10,0;MQ=22	GT:PL:DP:DV:SP:DP4	1/1:99,0,4:9:7:0:2,0,7,0	1/1:30,9,0:3:3:0:0,0,3,0
Locus_2_Transcript_252/4817_Confidence_1.000_Length_259	77	.	A	G	195	PASS	DP=56;VDB=0.0812128;SGB=-8.0987;RPB=0.0100756;MQB=0.658391;BQB=0.182719;MQ0F=0;ICB=0.5;HOB=0.5;AC=2;AN=4;DP4=17,0,20,0;MQ=34	GT:PL:DP:DV:SP:DP4	0/1:156,0,165:30:15:0:15,0,15,0	0/1:103,0,7:7:5:0:2,0,5,0
Locus_2_Transcript_252/4817_Confidence_1.000_Length_259	128	.	C	T	153	PASS	DP=78;VDB=7.79368e-06;SGB=13.0002;RPB=0.273322;MQB=0.958555;MQSB=9.58576e-05;BQB=0.9429;MQ0F=0;ICB=0.3;HOB=0.125;AC=1;AN=4;DP4=21,6,19,2;MQ=37	GT:PL:DP:DV:SP:DP4	0/1:217,0,243:39:21:7:13,5,19,2	0/0:0,27,193:9:0:0:8,1,0,0
Locus_2_Transcript_252/4817_Confidence_1.000_Length_259	161	.	C	A	330	PASS	DP=78;VDB=2.00223e-05;SGB=-10.5535;RPB=0.360306;MQB=0.975195;MQSB=0.081218;BQB=0.972043;MQ0F=0;ICB=0.3;HOB=0.125;AC=3;AN=4;DP4=11,2,26,2;MQ=39	GT:PL:DP:DV:SP:DP4	0/1:218,0,195:33:20:3:11,2,19,1	1/1:214,56,38:8:8:0:0,0,7,1
Locus_2_Transcript_254/4817_Confidence_1.000_Length_350	213	.	G	C	135	PASS	DP=101;VDB=0.0113295;SGB=13.0002;RPB=0.983958;MQB=0.55505;MQSB=0.194074;BQB=0.878245;MQ0F=0.0594059;ICB=0.5;HOB=0.5;AC=2;AN=4;DP4=28,25,9,12;MQ=26	GT:PL:DP:DV:SP:DP4	0/0:0,129,255:43:0:0:28,15,0,0	1/1:203,8,0:31:21:15:0,10,9,12
Locus_2_Transcript_254/4817_Confidence_1.000_Length_350	229	.	C	T	77	PASS	DP=96;VDB=0.291028;SGB=9.53539;RPB=0.744722;MQB=0.241868;MQSB=0.166326;BQB=0.850675;MQ0F=0.0625;ICB=0.3;HOB=0.125;AC=1;AN=4;DP4=23,30,5,11;MQ=27	GT:PL:DP:DV:SP:DP4	0/0:0,120,255:40:0:0:20,20,0,0	0/1:141,0,94:29:16:2:3,10,5,11
Locus_2_Transcript_255/4817_Confidence_1.000_Length_641	400	.	C	A	135	PASS	DP=49;VDB=0.91943;SGB=-7.48497;RPB=0.64558;MQB=9.69821e-07;MQSB=0.245113;BQB=0.828232;MQ0F=0;ICB=0.3;HOB=0.125;AC=3;AN=4;DP4=16,4,9,9;MQ=29	GT:PL:DP:DV:SP:DP4	0/1:10,0,247:24:4:6:16,4,2,2	1/1:190,42,0:14:14:0:0,0,7,7
Locus_2_Transcript_256/4817_Confidence_1.000_Length_715	170	.	T	A	148	PASS	DP=24;VDB=0.643457;SGB=-5.33664;RPB=0.930391;MQB=0.83135;MQSB=0.525788;BQB=0.988522;MQ0F=0;ICB=0.3;HOB=0.125;AC=3;AN=4;DP4=8,1,8,3;MQ=33	GT:PL:DP:DV:SP:DP4	0/1:79,0,142:13:4:7:8,1,2,2	1/1:150,34,16:7:7:0:0,0,6,1
Locus_2_Transcript_256/4817_Confidence_1.000_Length_715	175	.	G	T	152	PASS	DP=25;VDB=0.610755;SGB=-5.02916;RPB=0.999167;MQB=0.934728;MQSB=0.182398;BQB=0.986755;MQ0F=0;ICB=0.3;HOB=0.125;AC=3;AN=4;DP4=8,1,8,2;MQ=33	GT:PL:DP:DV:SP:DP4	0/1:60,0,148:12:3:3:8,1,2,1	1/1:157,21,0:7:7:0:0,0,6,1
Locus_2_Transcript_256/4817_Confidence_1.000_Length_715	458	.	A	T	148	PASS	DP=90;VDB=0.869465;SGB=-7.485;RPB=0.40521;MQB=0.0670846;MQSB=0.995319;BQB=0.632772;MQ0F=0.0777778;ICB=0.3;HOB=0.125;AC=1;AN=4;DP4=40,3,15,3;MQ=35	GT:PL:DP:DV:SP:DP4	0/0:0,62,255:43:6:4:35,2,5,1	0/1:212,0,130:18:12:0:5,1,10,2
Locus_2_Transcript_256/4817_Confidence_1.000_Length_715	459	.	T	G	150	PASS	DP=90;VDB=0.218005;SGB=5.38303;RPB=0.443043;MQB=0.448562;MQSB=0.995319;BQB=0.943544;MQ0F=0.0777778;ICB=0.3;HOB=0.125;AC=1;AN=4;DP4=47,4,8,2;MQ=35	GT:PL:DP:DV:SP:DP4	0/0:0,129,255:43:0:0:40,3,0,0	0/1:214,0,137:18:10:0:7,1,8,2
Locus_2_Transcript_256/4817_Confidence_1.000_Length_715	491	.	T	G	191	PASS	DP=87;VDB=0.00109152;SGB=-11.1672;RPB=0.887793;MQB=0.199217;MQSB=0.536768;BQB=0.67473;MQ0F=0.0804598;ICB=0.3;HOB=0.125;AC=1;AN=4;DP4=20,10,23,7;MQ=35	GT:PL:DP:DV:SP:DP4	0/1:255,0,232:43:29:0:11,3,22,7	0/0:0,48,255:17:1:0:9,7,1,0
Locus_2_Transcript_262/4817_Confidence_1.000_Length_301	200	.	T	C	94	PASS	DP=35;VDB=0.0654841;SGB=-5.02822;RPB=0.361567;MQB=0.685969;MQSB=0.012732;BQB=0.39425;MQ0F=0;ICB=0.5;HOB=0.5;AC=2;AN=4;DP4=9,4,3,7;MQ=30	GT:PL:DP:DV:SP:DP4	0/1:125,0,177:18:8:7:6,4,2,6	0/1:33,0,88:5:2:0:3,0,1,1
Locus_2_Transcript_262/4817_Confidence_1.000_Length_301	201	.	T	C	94	PASS	DP=35;VDB=0.0694363;SGB=-5.02822;RPB=0.361567;MQB=0.685969;MQSB=0.012732;BQB=0.345757;MQ0F=0;ICB=0.5;HOB=0.5;AC=2;AN=4;DP4=9,4,3,7;MQ=30	GT:PL:DP:DV:SP:DP4	0/1:125,0,176:18:8:7:6,4,2,6	0/1:33,0,88:5:2:0:3,0,1,1
Locus_2_Transcript_262/4817_Confidence_1.000_Length_301	202	.	G	T	94	PASS	DP=35;VDB=0.0735697;SGB=-5.02822;RPB=0.361567;MQB=0.685969;MQSB=0.012732;BQB=0.39425;MQ0F=0;ICB=0.5;HOB=0.5;AC=2;AN=4;DP4=9,4,3,7;MQ=30	GT:PL:DP:DV:SP:DP4	0/1:125,0,176:18:8:7:6,4,2,6	0/1:33,0,88:5:2:0:3,0,1,1
Locus_2_Transcript_262/4817_Confidence_1.000_Length_301	218	.	T	A	97	PASS	DP=30;VDB=0.0778886;SGB=-5.02822;RPB=0.974613;MQB=0.144941;MQSB=0.134468;BQB=0.220595;MQ0F=0;ICB=0.5;HOB=0.5;AC=2;AN=4;DP4=7,3,3,7;MQ=33	GT:PL:DP:DV:SP:DP4	0/1:128,0,167:15:8:9:5,2,2,6	0/1:33,0,100:5:2:0:2,1,1,1
Locus_2_Transcript_263/4817_Confidence_1.000_Length_208	63	.	G	C	90	PASS	DP=23;VDB=0.0777678;SGB=6.07412;RPB=0.823561;MQB=0.663189;BQB=0.924401;MQ0F=0;ICB=0.3;HOB=0.125;AC=1;AN=4;DP4=5,0,11,0;MQ=32	GT:PL:DP:DV:SP:DP4	0/1:152,0,70:15:11:0:4,0,11,0	0/0:0,3,4:1:0:0:1,0,0,0
Locus_2_Transcript_265/4817_Confidence_1.000_Length_244	66	.	C	T	156	PASS	DP=29;VDB=0.0316371;SGB=-0.520354;RPB=0.75;MQB=0.375;BQB=1;MQ0F=0;ICB=0.3;HOB=0.125;AC=3;AN=4;DP4=2,0,16,0;MQ=28	GT:PL:DP:DV:SP:DP4	1/1:148,39,0:13:13:0:0,0,13,0	0/1:73,0,31:5:3:0:2,0,3,0
Locus_2_Transcript_271/4817_Confidence_1.000_Length_256	154	.	C	T	135	PASS	DP=12;VDB=0.603537;SGB=-0.88904;RPB=1;MQB=1;MQSB=0.115573;BQB=1;MQ0F=0;ICB=0.3;HOB=0.125;AC=3;AN=4;DP4=1,0,2,6;MQ=35	GT:PL:DP:DV:SP:DP4	1/1:67,6,0:2:2:0:0,0,0,2	0/1:133,0,21:7:6:0:1,0,2,4
Locus_2_Transcript_271/4817_Confidence_1.000_Length_256	163	.	T	C	64	PASS	DP=11;VDB=0.397076;SGB=-3.1648;RPB=0.868321;MQB=0.372138;MQSB=0.150134;BQB=0.62023;MQ0F=0;ICB=0.3;HOB=0.125;AC=3;AN=4;DP4=1,3,2,2;MQ=34	GT:PL:DP:DV:SP:DP4	1/1:67,6,0:2:2:0:0,0,0,2	0/1:60,0,84:6:2:4:1,3,2,0
Locus_2_Transcript_272/4817_Confidence_1.000_Length_435	128	.	T	C	293	PASS	DP=88;VDB=0.011361;SGB=-11.1672;RPB=0.533124;MQB=0.966392;MQSB=0.684075;BQB=0.0288494;MQ0F=0;ICB=0.5;HOB=0.5;AC=2;AN=4;DP4=32,1,28,2;MQ=41	GT:PL:DP:DV:SP:DP4	0/1:172,0,225:37:14:0:22,1,13,1	0/1:184,0,155:26:16:0:10,0,15,1
Locus_2_Transcript_272/4817_Confidence_1.000_Length_435	195	.	C	A	115	PASS	DP=108;VDB=0.815362;SGB=10.2282;RPB=0.047012;MQB=0.935912;MQSB=0.998901;BQB=0.970145;MQ0F=0;ICB=0.3;HOB=0.125;AC=1;AN=4;DP4=46,24,16,1;MQ=41	GT:PL:DP:DV:SP:DP4	0/1:179,0,255:50:17:23:18,15,16,1	0/0:0,111,255:37:0:0:28,9,0,0
Locus_2_Transcript_272/4817_Confidence_1.000_Length_435	311	.	G	T	124	PASS	DP=131;VDB=0.254982;SGB=-5.6418;RPB=0.996554;MQB=0.248938;MQSB=4.46709e-05;BQB=0.978658;MQ0F=0;ICB=0.3;HOB=0.125;AC=1;AN=4;DP4=38,40,6,6;MQ=39	GT:PL:DP:DV:SP:DP4	0/0:0,147,255:61:1:0:32,28,0,1	0/1:188,0,255:29:11:4:6,12,6,5
Locus_2_Transcript_272/4817_Confidence_1.000_Length_435	323	.	C	A	324	PASS	DP=129;VDB=0.00587739;SGB=-17.3043;RPB=0.986973;MQB=0.00186502;MQSB=4.58022e-05;BQB=0.835454;MQ0F=0;ICB=0.5;HOB=0.5;AC=2;AN=4;DP4=14,22,27,23;MQ=39	GT:PL:DP:DV:SP:DP4	0/1:255,0,255:60:42:2:8,10,23,19	0/1:132,0,255:26:8:2:6,12,4,4
Locus_2_Transcript_272/4817_Confidence_1.000_Length_435	324	.	A	G	75	PASS	DP=127;VDB=0.648388;SGB=3.31571;RPB=0.5333;MQB=0.252853;MQSB=2.47151e-05;BQB=0.699803;MQ0F=0;ICB=0.3;HOB=0.125;AC=1;AN=4;DP4=38,41,2,5;MQ=39	GT:PL:DP:DV:SP:DP4	0/0:0,181,255:60:0:0:30,30,0,0	0/1:140,0,255:26:7:2:8,11,2,5
Locus_2_Transcript_272/4817_Confidence_1.000_Length_435	327	.	T	G	321	PASS	DP=124;VDB=0.00483103;SGB=-16.3837;RPB=0.890158;MQB=0.000842512;MQSB=4.13517e-05;BQB=0.691385;MQ0F=0;ICB=0.5;HOB=0.5;AC=2;AN=4;DP4=14,22,26,21;MQ=39	GT:PL:DP:DV:SP:DP4	0/1:255,0,255:57:39:2:8,10,22,17	0/1:129,0,255:26:8:2:6,12,4,4
Locus_2_Transcript_272/4817_Confidence_1.000_Length_435	330	.	G	A	76	PASS	DP=122;VDB=0.117477;SGB=-6.25755;RPB=0.289835;MQB=0.0013526;MQSB=5.9453e-05;BQB=0.494596;MQ0F=0;ICB=0.5;HOB=0.5;AC=2;AN=4;DP4=32,35,8,6;MQ=39	GT:PL:DP:DV:SP:DP4	0/1:11,0,255:56:6:2:26,24,4,2	0/1:132,0,255:25:8:2:6,11,4,4
Locus_2_Transcript_272/4817_Confidence_1.000_Length_435	338	.	T	C	301	PASS	DP=103;VDB=0.000177101;SGB=-15.4632;RPB=0.962576;MQB=0.00152387;MQSB=0.000882546;BQB=0.993019;MQ0F=0;ICB=0.5;HOB=0.5;AC=2;AN=4;DP4=11,18,19,25;MQ=39	GT:PL:DP:DV:SP:DP4	0/1:255,0,215:50:37:0:6,7,16,21	0/1:109,0,255:23:7:2:5,11,3,4
Locus_2_Transcript_272/4817_Confidence_1.000_Length_435	363	.	A	G	214	PASS	DP=83;VDB=0.00168358;SGB=-7.79185;RPB=0.657432;MQB=0.252688;MQSB=0.338763;BQB=0.657432;MQ0F=0;ICB=0.5;HOB=0.5;AC=2;AN=4;DP4=12,34,3,16;MQ=39	GT:PL:DP:DV:SP:DP4	0/1:186,0,255:44:13:1:10,21,3,10	0/1:93,0,211:21:6:0:2,13,0,6
Locus_2_Transcript_273/4817_Confidence_1.000_Length_451	36	.	G	A	213	PASS	DP=67;VDB=2.01167e-14;SGB=-12.3947;RPB=0.640816;MQB=0.817742;BQB=0.929549;MQ0F=0.104478;ICB=0.5;HOB=0.5;AC=2;AN=4;DP4=23,0,34,0;MQ=28	GT:PL:DP:DV:SP:DP4	0/1:145,0,119:40:22:0:18,0,22,0	0/1:132,0,90:17:12:0:5,0,12,0
Locus_2_Transcript_273/4817_Confidence_1.000_Length_451	57	.	A	C	193	PASS	DP=106;VDB=1.48662e-09;SGB=-9.93983;RPB=0.712;MQB=0.00257207;MQSB=1;BQB=0.845652;MQ0F=0.103774;ICB=0.5;HOB=0.5;AC=2;AN=4;DP4=52,1,26,0;MQ=31	GT:PL:DP:DV:SP:DP4	0/1:144,0,160:54:18:0:35,1,18,0	0/1:113,0,161:25:8:0:17,0,8,0
Locus_2_Transcript_273/4817_Confidence_1.000_Length_451	101	.	C	T	289	PASS	DP=169;VDB=0.0432036;SGB=-20.066;RPB=0.997121;MQB=0.00345878;MQSB=0.409091;BQB=0.249813;MQ0F=0.0828402;ICB=0.5;HOB=0.5;AC=2;AN=4;DP4=63,1,58,1;MQ=34	GT:PL:DP:DV:SP:DP4	0/1:201,0,153:81:42:0:39,0,41,1	0/1:151,0,197:42:17:0:24,1,17,0
Locus_2_Transcript_273/4817_Confidence_1.000_Length_451	144	.	T	C	92	PASS	DP=249;VDB=0.73974;SGB=-15.4632;RPB=0.860791;MQB=1.32285e-05;MQSB=3.13037e-07;BQB=0.893607;MQ0F=0.0321285;ICB=0.3;HOB=0.125;AC=1;AN=4;DP4=121,15,33,11;MQ=36	GT:PL:DP:DV:SP:DP4	0/1:157,0,255:119:37:5:71,11,29,8	0/0:0,42,255:61:7:16:50,4,4,3
Locus_2_Transcript_273/4817_Confidence_1.000_Length_451	167	.	C	T	107	PASS	DP=241;VDB=0.495636;SGB=-11.7809;RPB=0.824351;MQB=0.348052;MQSB=0.00345306;BQB=0.934171;MQ0F=0.0165975;ICB=0.3;HOB=0.125;AC=1;AN=4;DP4=103,39,30,2;MQ=38	GT:PL:DP:DV:SP:DP4	0/0:0,14,255:112:14:10:68,30,13,1	0/1:171,0,255:62:18:6:35,9,17,1
Locus_2_Transcript_273/4817_Confidence_1.000_Length_451	202	.	A	G	387	PASS	DP=265;VDB=0.617845;SGB=-24.6688;RPB=0.985123;MQB=0.383934;MQSB=0.999762;BQB=0.7156;MQ0F=0.00377358;ICB=0.5;HOB=0.5;AC=2;AN=4;DP4=77,30,51,23;MQ=41	GT:PL:DP:DV:SP:DP4	0/1:255,0,255:118:57:2:42,19,37,20	0/1:196,0,255:63:17:1:35,11,14,3
Locus_2_Transcript_273/4817_Confidence_1.000_Length_451	363	.	G	C	197	PASS	DP=94;VDB=0.00142195;SGB=-8.4055;RPB=0.670783;MQB=0.991754;MQSB=0.869979;BQB=0.891616;MQ0F=0;ICB=0.5;HOB=0.5;AC=2;AN=4;DP4=17,26,11,10;MQ=41	GT:PL:DP:DV:SP:DP4	0/1:255,0,255:44:19:7:9,16,11,8	0/1:6,0,255:20:2:3:8,10,0,2
Locus_2_Transcript_275/4817_Confidence_1.000_Length_278	99	.	G	T	85	PASS	DP=58;VDB=0.280567;SGB=-5.94997;RPB=0.867899;MQB=0.158573;BQB=0.346032;MQ0F=0.0344828;ICB=0.3;HOB=0.125;AC=1;AN=4;DP4=28,0,13,0;MQ=37	GT:PL:DP:DV:SP:DP4	0/0:0,6,171:26:2:0:24,0,2,0	0/1:149,0,52:15:11:0:4,0,11,0
Locus_2_Transcript_275/4817_Confidence_1.000_Length_278	199	.	A	C	70	PASS	DP=59;VDB=0.00169601;SGB=2.63044;RPB=0.0450722;MQB=0.252195;MQSB=0.407581;BQB=0.975808;MQ0F=0.0338983;ICB=0.3;HOB=0.125;AC=1;AN=4;DP4=15,20,3,3;MQ=36	GT:PL:DP:DV:SP:DP4	0/1:135,0,255:24:6:0:8,10,3,3	0/0:0,51,255:17:0:0:7,10,0,0
Locus_2_Transcript_275/4817_Confidence_1.000_Length_278	253	.	A	G	89	PASS	DP=20;VDB=0.000327359;SGB=-4.72062;RPB=0.677149;MQB=0.953364;MQSB=0.5;BQB=0.939528;MQ0F=0.1;ICB=0.5;HOB=0.5;AC=2;AN=4;DP4=1,8,1,8;MQ=31	GT:PL:DP:DV:SP:DP4	0/1:56,0,98:7:2:0:0,5,1,1	0/1:96,0,57:11:7:0:1,3,0,7
Locus_2_Transcript_276/4817_Confidence_1.000_Length_319	224	.	T	A	190	PASS	DP=47;VDB=0.137493;SGB=-7.485;RPB=0.102679;MQB=0.997417;MQSB=0.35541;BQB=0.7587;MQ0F=0.0212766;ICB=0.3;HOB=0.125;AC=3;AN=4;DP4=5,5,13,5;MQ=23	GT:PL:DP:DV:SP:DP4	0/1:50,0,148:16:6:5:5,5,5,1	1/1:205,33,0:12:12:0:0,0,8,4
Locus_2_Transcript_277/4817_Confidence_1.000_Length_232	130	.	C	G	90	PASS	DP=133;VDB=0.121667;SGB=-5.95064;RPB=0.943853;MQB=0.88411;MQSB=0.00191809;BQB=0.912343;MQ0F=0.0075188;ICB=0.5;HOB=0.5;AC=2;AN=4;DP4=46,18,11,2;MQ=37	GT:PL:DP:DV:SP:DP4	0/1:88,0,243:21:5:0:14,2,4,1	0/1:70,0,255:56:8:4:32,16,7,1
Locus_2_Transcript_284/4817_Confidence_1.000_Length_308	245	.	C	G	152	PASS	DP=41;VDB=0.109757;SGB=-5.33677;RPB=0.89594;MQB=0.25503;MQSB=0.819567;BQB=0.760374;MQ0F=0;ICB=0.5;HOB=0.5;AC=2;AN=4;DP4=6,10,7,4;MQ=37	GT:PL:DP:DV:SP:DP4	0/1:106,0,183:14:6:0:5,3,4,2	0/1:110,0,162:13:5:7:1,7,3,2
Locus_2_Transcript_291/4817_Confidence_1.000_Length_267	127	.	G	C	456	PASS	DP=783;VDB=0.0117092;SGB=-1.38629;RPB=0.834694;MQB=0.993024;MQSB=3.97342e-20;BQB=0.785624;MQ0F=0.0344828;AC=4;AN=4;DP4=2,1,452,70;MQ=22	GT:PL:DP:DV:SP:DP4	1/1:255,255,0:305:303:0:2,0,249,54	1/1:255,255,0:220:219:0:0,1,203,16
Locus_2_Transcript_291/4817_Confidence_1.000_Length_267	156	.	T	C	455	PASS	DP=860;VDB=6.64596e-08;SGB=-1.38629;RPB=0.615054;MQB=0.236271;MQSB=1.64059e-06;BQB=0.861328;MQ0F=0.0302326;AC=4;AN=4;DP4=8,5,393,117;MQ=23	GT:PL:DP:DV:SP:DP4	1/1:255,255,0:301:295:0:5,1,223,72	1/1:255,255,0:222:215:14:3,4,170,45
Locus_2_Transcript_295/4817_Confidence_1.000_Length_222	61	.	A	C	254	PASS	DP=172;VDB=1.57177e-31;SGB=-1.37699;RPB=0.714286;MQB=0;BQB=0.485714;MQ0F=0.139535;AC=4;AN=4;DP4=2,0,105,0;MQ=16	GT:PL:DP:DV:SP:DP4	1/1:165,105,0:35:35:0:0,0,35,0	1/1:144,146,0:72:70:0:2,0,70,0
Locus_2_Transcript_295/4817_Confidence_1.000_Length_222	88	.	G	A	280	PASS	DP=206;VDB=1.85515e-31;SGB=-1.37944;RPB=0.3223;MQB=0.296225;MQSB=1;BQB=0.3223;MQ0F=0.15534;AC=4;AN=4;DP4=3,0,106,1;MQ=17	GT:PL:DP:DV:SP:DP4	1/1:166,108,0:36:36:0:0,0,36,0	1/1:169,142,0:74:71:0:3,0,70,1
Locus_2_Transcript_295/4817_Confidence_1.000_Length_222	90	.	T	C	240	PASS	DP=212;VDB=3.42496e-33;SGB=-1.38245;RPB=0.350581;MQB=0.626272;BQB=0.574417;MQ0F=0.15566;AC=4;AN=4;DP4=6,0,104,0;MQ=17	GT:PL:DP:DV:SP:DP4	1/1:161,108,0:36:36:0:0,0,36,0	1/1:134,87,0:74:68:0:6,0,68,0
Locus_2_Transcript_295/4817_Confidence_1.000_Length_222	139	.	A	C	452	PASS	DP=162;VDB=7.34139e-13;SGB=-1.37047;RPB=0.494845;MQB=0;MQSB=0.0517355;BQB=0.845361;MQ0F=0.160494;AC=4;AN=4;DP4=2,0,60,37;MQ=17	GT:PL:DP:DV:SP:DP4	1/1:255,96,0:32:32:0:0,0,21,11	1/1:252,122,0:67:65:3:2,0,39,26
Locus_2_Transcript_300/4817_Confidence_1.000_Length_430	184	.	C	G	319	PASS	DP=67;VDB=0.0199811;SGB=-8.71242;RPB=0.918605;MQB=0.0180184;MQSB=0.998852;BQB=0.828673;MQ0F=0;ICB=0.5;HOB=0.5;AC=2;AN=4;DP4=21,6,17,5;MQ=40	GT:PL:DP:DV:SP:DP4	0/1:209,0,143:20:12:3:8,0,10,2	0/1:173,0,255:29:10:0:13,6,7,3
Locus_2_Transcript_300/4817_Confidence_1.000_Length_430	208	.	G	C	225	PASS	DP=74;VDB=0.0135538;SGB=-7.17815;RPB=0.130498;MQB=0.020552;MQSB=0.698243;BQB=0.697274;MQ0F=0;ICB=0.5;HOB=0.5;AC=2;AN=4;DP4=23,11,13,4;MQ=40	GT:PL:DP:DV:SP:DP4	0/1:155,0,233:21:9:2:9,3,8,1	0/1:134,0,255:30:8:0:14,8,5,3
Locus_2_Transcript_300/4817_Confidence_1.000_Length_430	352	.	A	G	66	PASS	DP=22;VDB=0.37035;SGB=1.94933;RPB=0.165122;MQB=0.97357;MQSB=0.293758;BQB=0.484671;MQ0F=0;ICB=0.3;HOB=0.125;AC=1;AN=4;DP4=1,13,2,3;MQ=40	GT:PL:DP:DV:SP:DP4	0/1:130,0,99:9:5:0:1,3,2,3	0/0:0,30,175:10:0:0:0,10,0,0
Locus_2_Transcript_300/4817_Confidence_1.000_Length_430	379	.	C	G	74	PASS	DP=10;VDB=0.119109;SGB=1.94933;RPB=0.900802;MQB=0.900802;MQSB=0.25;BQB=0.450401;MQ0F=0;ICB=0.5;HOB=0.5;AC=2;AN=4;DP4=0,3,2,3;MQ=37	GT:PL:DP:DV:SP:DP4	1/1:139,4,0:6:5:0:0,1,2,3	0/0:0,6,67:2:0:0:0,2,0,0
Locus_2_Transcript_302/4817_Confidence_1.000_Length_1211	388	.	C	A	158	PASS	DP=31;VDB=0.818265;SGB=-5.02958;RPB=0.958856;MQB=0.605689;MQSB=0.624635;BQB=0.99688;MQ0F=0;ICB=0.5;HOB=0.5;AC=2;AN=4;DP4=9,7,8,2;MQ=41	GT:PL:DP:DV:SP:DP4	0/1:101,0,120:9:4:0:3,2,3,1	0/1:121,0,241:17:6:5:6,5,5,1
Locus_2_Transcript_302/4817_Confidence_1.000_Length_1211	395	.	G	A	176	PASS	DP=28;VDB=0.481017;SGB=-5.02958;RPB=0.882836;MQB=0.624282;MQSB=0.9171;BQB=0.857404;MQ0F=0;ICB=0.5;HOB=0.5;AC=2;AN=4;DP4=8,7,7,3;MQ=41	GT:PL:DP:DV:SP:DP4	0/1:101,0,120:9:4:0:3,2,3,1	0/1:139,0,222:16:6:2:5,5,4,2
Locus_2_Transcript_302/4817_Confidence_1.000_Length_1211	623	.	C	T	97	PASS	DP=30;VDB=0.212008;SGB=-4.41269;RPB=0.979428;MQB=0.612391;MQSB=0.966223;BQB=0.750688;MQ0F=0;ICB=0.5;HOB=0.5;AC=2;AN=4;DP4=10,7,7,1;MQ=41	GT:PL:DP:DV:SP:DP4	0/1:43,0,226:12:2:0:5,5,1,1	0/1:119,0,166:13:6:3:5,2,6,0
Locus_2_Transcript_302/4817_Confidence_1.000_Length_1211	654	.	C	A	90	PASS	DP=25;VDB=0.956237;SGB=-4.10417;RPB=0.798183;MQB=0.579578;MQSB=0.994334;BQB=0.966484;MQ0F=0;ICB=0.5;HOB=0.5;AC=2;AN=4;DP4=8,6,4,3;MQ=41	GT:PL:DP:DV:SP:DP4	0/1:36,0,173:9:2:0:2,5,1,1	0/1:119,0,157:12:5:3:6,1,3,2
Locus_2_Transcript_302/4817_Confidence_1.000_Length_1211	657	.	A	G	139	PASS	DP=25;VDB=0.897035;SGB=-4.41425;RPB=0.968386;MQB=0.64199;MQSB=0.99938;BQB=0.989565;MQ0F=0;ICB=0.5;HOB=0.5;AC=2;AN=4;DP4=7,6,4,4;MQ=41	GT:PL:DP:DV:SP:DP4	0/1:68,0,147:9:3:0:1,5,1,2	0/1:135,0,157:12:5:3:6,1,3,2
Locus_2_Transcript_302/4817_Confidence_1.000_Length_1211	1029	.	C	A	97	PASS	DP=36;VDB=0.806316;SGB=-4.10598;RPB=0.414106;MQB=1;MQSB=1;BQB=0.993896;MQ0F=0;ICB=0.5;HOB=0.5;AC=2;AN=4;DP4=14,6,5,2;MQ=42	GT:PL:DP:DV:SP:DP4	0/1:96,0,231:14:4:2:7,3,2,2	0/1:67,0,227:13:3:3:7,3,3,0
Locus_2_Transcript_302/4817_Confidence_1.000_Length_1211	1101	.	A	G	148	PASS	DP=31;VDB=0.00418132;SGB=-4.41469;RPB=0.276292;MQB=0.985548;MQSB=0.995121;BQB=0.431349;MQ0F=0;ICB=0.5;HOB=0.5;AC=2;AN=4;DP4=4,10,6,2;MQ=41	GT:PL:DP:DV:SP:DP4	0/1:103,0,132:11:4:16:0,7,3,1	0/1:109,0,183:11:4:0:4,3,3,1
Locus_2_Transcript_303/4817_Confidence_1.000_Length_1054	760	.	T	C	78	PASS	DP=26;VDB=0.17309;SGB=-3.79454;RPB=0.978183;MQB=0.978183;MQSB=0.889418;BQB=0.854821;MQ0F=0;ICB=0.5;HOB=0.5;AC=2;AN=4;DP4=6,11,2,4;MQ=41	GT:PL:DP:DV:SP:DP4	0/1:48,0,133:7:2:0:1,4,0,2	0/1:95,0,251:16:4:0:5,7,2,2
Locus_2_Transcript_304/4817_Confidence_1.000_Length_273	96	.	T	C	185	PASS	DP=159;VDB=0.0401576;SGB=-1.31727;RPB=0.326466;MQB=0.801929;BQB=0.999945;MQ0F=0.132075;AC=4;AN=4;DP4=11,0,94,0;MQ=23	GT:PL:DP:DV:SP:DP4	1/1:111,0,5:33:29:0:4,0,29,0	1/1:133,62,0:72:65:0:7,0,65,0
Locus_2_Transcript_304/4817_Confidence_1.000_Length_273	103	.	A	G	299	PASS	DP=172;VDB=0.0669389;SGB=-1.38245;RPB=0.199208;MQB=0.920619;MQSB=0.272727;BQB=0.905223;MQ0F=0.122093;AC=4;AN=4;DP4=8,0,102,2;MQ=24	GT:PL:DP:DV:SP:DP4	1/1:190,94,0:37:36:0:1,0,36,0	1/1:164,86,0:75:68:0:7,0,66,2
Locus_2_Transcript_308/4817_Confidence_1.000_Length_528	85	.	A	G	130	PASS	DP=21;VDB=0.558106;SGB=-4.72185;RPB=0.416716;MQB=0.759945;BQB=0.987474;MQ0F=0;ICB=0.3;HOB=0.125;AC=3;AN=4;DP4=7,0,9,0;MQ=38	GT:PL:DP:DV:SP:DP4	1/1:92,9,0:3:3:0:0,0,3,0	0/1:102,0,130:13:6:0:7,0,6,0
Locus_2_Transcript_308/4817_Confidence_1.000_Length_528	104	.	T	G	69	PASS	DP=38;VDB=0.00178347;SGB=-4.72185;RPB=0.00114674;MQB=0.118243;BQB=0.193781;MQ0F=0;ICB=0.5;HOB=0.5;AC=2;AN=4;DP4=16,0,9,0;MQ=36	GT:PL:DP:DV:SP:DP4	0/1:127,0,69:9:6:0:3,0,6,0	0/1:5,0,177:16:3:0:13,0,3,0
Locus_2_Transcript_308/4817_Confidence_1.000_Length_528	151	.	A	G	114	PASS	DP=40;VDB=0.136643;SGB=-5.33664;RPB=0.946915;MQB=0.0304732;MQSB=0.884222;BQB=0.803979;MQ0F=0;ICB=0.5;HOB=0.5;AC=2;AN=4;DP4=14,6,10,1;MQ=37	GT:PL:DP:DV:SP:DP4	0/1:101,0,109:9:4:0:5,0,4,0	0/1:77,0,255:22:7:5:9,6,6,1
Locus_2_Transcript_308/4817_Confidence_1.000_Length_528	262	.	T	C	262	PASS	DP=38;VDB=0.0530471;SGB=-7.485;RPB=0.783526;MQB=0.144064;MQSB=0.924003;BQB=0.144064;MQ0F=0.0263158;ICB=0.5;HOB=0.5;AC=2;AN=4;DP4=9,3,8,10;MQ=37	GT:PL:DP:DV:SP:DP4	0/1:238,0,36:14:12:3:2,0,6,6	0/1:88,0,223:16:6:5:7,3,2,4
Locus_2_Transcript_308/4817_Confidence_1.000_Length_528	442	.	G	T	80	PASS	DP=18;VDB=0.236588;SGB=-3.79618;RPB=0.220239;MQB=0.660716;MQSB=0.931779;BQB=0.542126;MQ0F=0.0555556;ICB=0.5;HOB=0.5;AC=2;AN=4;DP4=2,4,4,2;MQ=27	GT:PL:DP:DV:SP:DP4	0/1:67,0,26:5:3:4:0,2,2,1	0/1:77,0,60:7:3:0:2,2,2,1
Locus_2_Transcript_310/4817_Confidence_1.000_Length_587	390	.	C	T	73	PASS	DP=53;VDB=0.407595;SGB=-7.17813;RPB=0.602497;MQB=0.73072;MQSB=0.469697;BQB=0.912061;MQ0F=0.283019;ICB=0.5;HOB=0.5;AC=2;AN=4;DP4=18,0,15,2;MQ=17	GT:PL:DP:DV:SP:DP4	0/1:74,0,51:9:5:0:4,0,5,0	0/1:62,0,107:26:12:7:14,0,10,2
Locus_2_Transcript_310/4817_Confidence_1.000_Length_587	416	.	T	C	130	PASS	DP=55;VDB=0.0581549;SGB=-0.664676;RPB=0.931035;MQB=0.0344828;MQSB=0.465043;BQB=0.948276;MQ0F=0.345455;AC=4;AN=4;DP4=2,0,25,4;MQ=16	GT:PL:DP:DV:SP:DP4	1/1:94,21,0:7:7:0:0,0,7,0	1/1:93,0,2:24:22:0:2,0,18,4
Locus_2_Transcript_310/4817_Confidence_1.000_Length_587	432	.	G	A	150	PASS	DP=54;VDB=0.107279;SGB=-0.664676;RPB=0.828109;MQB=0.489067;MQSB=0.965685;BQB=0.889092;MQ0F=0.314815;ICB=0.3;HOB=0.125;AC=3;AN=4;DP4=2,1,20,9;MQ=15	GT:PL:DP:DV:SP:DP4	1/1:97,21,0:7:7:0:0,0,7,0	0/1:117,0,13:25:22:0:2,1,13,9
Locus_2_Transcript_322/4817_Confidence_1.000_Length_334	206	.	A	G	87	PASS	DP=14;VDB=0.0309674;SGB=1.97062;RPB=0.346719;MQB=0.924584;MQSB=0.243649;BQB=0.231146;MQ0F=0.0714286;ICB=0.3;HOB=0.125;AC=1;AN=4;DP4=1,2,4,2;MQ=35	GT:PL:DP:DV:SP:DP4	0/0:0,3,33:1:0:0:1,0,0,0	0/1:150,0,33:8:6:4:0,2,4,2
Locus_2_Transcript_322/4817_Confidence_1.000_Length_334	251	.	T	G	77	PASS	DP=10;VDB=0.218338;SGB=1.97062;RPB=1;MQB=1;MQSB=0.6;BQB=1;MQ0F=0;ICB=0.3;HOB=0.125;AC=3;AN=4;DP4=1,0,1,5;MQ=33	GT:PL:DP:DV:SP:DP4	0/1:0,3,42:1:0:0:1,0,0,0	1/1:143,18,0:6:6:0:0,0,1,5
Locus_2_Transcript_323/4817_Confidence_1.000_Length_263	183	.	A	C,T	269	PASS	DP=73;VDB=1.29676e-06;SGB=-1.3728;RPB=0.708654;MQB=0.772075;MQSB=0.134475;BQB=0.991701;MQ0F=0.123288;AC=3,1;AN=4;DP4=4,2,24,11;MQ=23	GT:PL:DP:DV:SP:DP4	1/1:182,1,0,186,25,212:16:15:0:1,0,6,9	1/2:206,76,87,117,0,133:25:20:8:3,2,18,2
Locus_2_Transcript_328/4817_Confidence_1.000_Length_373	234	.	A	G	141	PASS	DP=52;VDB=0.0256226;SGB=-5.33664;RPB=0.83401;MQB=0.612694;MQSB=0.0933903;BQB=0.967211;MQ0F=0;ICB=0.3;HOB=0.125;AC=3;AN=4;DP4=18,1,9,2;MQ=33	GT:PL:DP:DV:SP:DP4	0/1:98,0,200:26:7:3:18,1,6,1	1/1:107,12,0:4:4:0:0,0,3,1
Locus_2_Transcript_336/4817_Confidence_1.000_Length_394	125	.	T	G	178	PASS	DP=17;VDB=0.00335509;SGB=-1.24744;RPB=0.90252;MQB=0.284674;MQSB=1;BQB=0.66348;MQ0F=0;ICB=0.3;HOB=0.125;AC=3;AN=4;DP4=3,1,13,0;MQ=37	GT:PL:DP:DV:SP:DP4	1/1:135,18,0:6:6:0:0,0,6,0	0/1:107,0,99:11:7:0:3,1,7,0
Locus_2_Transcript_336/4817_Confidence_1.000_Length_394	240	.	T	C	138	PASS	DP=68;VDB=0.132714;SGB=-5.64284;RPB=0.552791;MQB=0.937872;MQSB=0.443565;BQB=0.32256;MQ0F=0;ICB=0.5;HOB=0.5;AC=2;AN=4;DP4=18,11,11,1;MQ=39	GT:PL:DP:DV:SP:DP4	0/1:36,0,255:14:2:3:6,6,2,0	0/1:168,0,255:27:10:4:12,5,9,1
Locus_2_Transcript_354/4817_Confidence_1.000_Length_525	137	.	A	G	156	PASS	DP=16;VDB=0.512083;SGB=-0.751012;RPB=1;MQB=1;MQSB=0.777778;BQB=1;MQ0F=0;ICB=0.3;HOB=0.125;AC=3;AN=4;DP4=1,0,8,2;MQ=35	GT:PL:DP:DV:SP:DP4	0/1:59,0,33:3:2:0:1,0,2,0	1/1:164,24,3:8:8:0:0,0,6,2
Locus_2_Transcript_358/4817_Confidence_1.000_Length_261	42	.	C	G	183	PASS	DP=207;VDB=2.27468e-10;SGB=-18.8386;RPB=0.339461;MQB=0.921256;BQB=0.153919;MQ0F=0.0338164;ICB=0.5;HOB=0.5;AC=2;AN=4;DP4=89,0,55,0;MQ=27	GT:PL:DP:DV:SP:DP4	0/1:122,0,151:54:23:0:31,0,23,0	0/1:125,0,171:90:32:0:58,0,32,0
Locus_2_Transcript_358/4817_Confidence_1.000_Length_261	45	.	G	A	178	PASS	DP=223;VDB=8.8036e-07;SGB=-19.4523;RPB=0.208423;MQB=0.155637;BQB=0.0889094;MQ0F=0.0313901;ICB=0.5;HOB=0.5;AC=2;AN=4;DP4=88,0,57,0;MQ=26	GT:PL:DP:DV:SP:DP4	0/1:111,0,164:54:27:0:27,0,27,0	0/1:131,0,161:91:30:0:61,0,30,0
Locus_2_Transcript_358/4817_Confidence_1.000_Length_261	160	.	C	G	445	PASS	DP=412;VDB=0.000986658;SGB=-56.2746;RPB=0.375185;MQB=0.429189;MQSB=0.0747295;BQB=0.226501;MQ0F=0.0169903;ICB=0.5;HOB=0.5;AC=2;AN=4;DP4=51,16,114,63;MQ=30	GT:PL:DP:DV:SP:DP4	0/1:255,0,241:113:69:9:35,9,45,24	0/1:255,0,98:131:108:1:16,7,69,39
Locus_2_Transcript_358/4817_Confidence_1.000_Length_261	197	.	A	G	199	PASS	DP=295;VDB=5.89538e-06;SGB=-15.77;RPB=0.788015;MQB=0.21081;MQSB=0.999201;BQB=0.718167;MQ0F=0.0237288;ICB=0.5;HOB=0.5;AC=2;AN=4;DP4=79,69,22,23;MQ=31	GT:PL:DP:DV:SP:DP4	0/1:213,0,255:92:30:3:38,24,16,14	0/1:53,0,255:101:15:1:41,45,6,9
Locus_2_Transcript_359/4817_Confidence_1.000_Length_307	34	.	A	G	195	PASS	DP=32;VDB=3.03715e-06;SGB=-1.29159;RPB=0.9;MQB=0.325;BQB=0.575;MQ0F=0.0625;AC=4;AN=4;DP4=2,0,20,0;MQ=28	GT:PL:DP:DV:SP:DP4	1/1:160,36,0:12:12:0:0,0,12,0	1/1:91,0,1:10:8:0:2,0,8,0
Locus_2_Transcript_359/4817_Confidence_1.000_Length_307	40	.	G	A	261	PASS	DP=50;VDB=1.63373e-05;SGB=-1.35771;RPB=0.398955;MQB=0.528279;BQB=0.940104;MQ0F=0.04;ICB=0.3;HOB=0.125;AC=3;AN=4;DP4=5,0,28,0;MQ=30	GT:PL:DP:DV:SP:DP4	1/1:184,48,0:16:16:0:0,0,16,0	0/1:142,0,49:17:12:0:5,0,12,0
Locus_2_Transcript_359/4817_Confidence_1.000_Length_307	160	.	A	T	294	PASS	DP=105;VDB=0.675071;SGB=-1.38583;RPB=0.874881;MQB=0.271079;MQSB=9.10055e-06;BQB=0.776689;MQ0F=0.190476;ICB=0.3;HOB=0.125;AC=3;AN=4;DP4=4,1,42,15;MQ=17	GT:PL:DP:DV:SP:DP4	1/1:255,78,0:26:26:0:0,0,17,9	0/1:104,0,33:36:31:0:4,1,25,6
Locus_2_Transcript_359/4817_Confidence_1.000_Length_307	179	.	C	A	120	PASS	DP=88;VDB=0.255415;SGB=-13.0084;RPB=0.439607;MQB=0.199713;MQSB=5.58279e-06;BQB=0.631083;MQ0F=0.272727;ICB=0.5;HOB=0.5;AC=2;AN=4;DP4=14,7,25,11;MQ=15	GT:PL:DP:DV:SP:DP4	0/1:142,0,105:24:15:0:5,4,9,6	0/1:41,0,97:33:21:0:9,3,16,5
Locus_2_Transcript_359/4817_Confidence_1.000_Length_307	188	.	G	T	89	PASS	DP=89;VDB=0.211781;SGB=-11.4741;RPB=0.289748;MQB=0.0972115;MQSB=1.21472e-05;BQB=0.193309;MQ0F=0.292135;ICB=0.5;HOB=0.5;AC=2;AN=4;DP4=17,8,22,9;MQ=13	GT:PL:DP:DV:SP:DP4	0/1:121,0,87:21:12:0:5,4,7,5	0/1:31,0,108:35:19:0:12,4,15,4
Locus_2_Transcript_359/4817_Confidence_1.000_Length_307	213	.	T	C	64	PASS	DP=78;VDB=1.65739e-06;SGB=-1.30572;RPB=0.365597;MQB=0.0254449;MQSB=0.0114193;BQB=0.940368;MQ0F=0.320513;ICB=0.3;HOB=0.125;AC=3;AN=4;DP4=3,3,24,17;MQ=10	GT:PL:DP:DV:SP:DP4	1/1:99,39,0:14:14:0:0,0,7,7	0/1:29,0,36:33:27:2:3,3,17,10
Locus_2_Transcript_359/4817_Confidence_1.000_Length_307	219	.	C	T	104	PASS	DP=75;VDB=3.93849e-08;SGB=-1.35588;RPB=0.423162;MQB=0.0320647;MQSB=0.0142898;BQB=0.977467;MQ0F=0.333333;ICB=0.3;HOB=0.125;AC=3;AN=4;DP4=3,3,23,20;MQ=10	GT:PL:DP:DV:SP:DP4	1/1:137,48,0:16:16:0:0,0,8,8	0/1:31,0,36:33:27:0:3,3,15,12
Locus_2_Transcript_363/4817_Confidence_1.000_Length_227	61	.	A	G	140	PASS	DP=95;VDB=0.0105785;SGB=-1.38563;RPB=0.690606;MQB=0.00696549;BQB=0.999813;MQ0F=0.0947368;ICB=0.3;HOB=0.125;AC=3;AN=4;DP4=8,0,59,0;MQ=22	GT:PL:DP:DV:SP:DP4	1/1:101,5,0:28:26:0:2,0,26,0	0/1:103,0,31:39:33:0:6,0,33,0
Locus_2_Transcript_363/4817_Confidence_1.000_Length_227	120	.	A	G	311	PASS	DP=139;VDB=0.00148904;SGB=-1.38627;RPB=0.970656;MQB=0.00181275;MQSB=0.000108158;BQB=0.638318;MQ0F=0.0431655;ICB=0.3;HOB=0.125;AC=3;AN=4;DP4=8,2,48,23;MQ=22	GT:PL:DP:DV:SP:DP4	1/1:161,15,0:38:35:0:3,0,27,8	0/1:214,0,80:43:36:2:5,2,21,15
Locus_2_Transcript_363/4817_Confidence_1.000_Length_227	167	.	G	A	294	PASS	DP=98;VDB=2.60141e-09;SGB=-16.3837;RPB=0.828279;MQB=0.0017603;MQSB=0.634725;BQB=0.449754;MQ0F=0.0510204;ICB=0.5;HOB=0.5;AC=2;AN=4;DP4=4,20,23,24;MQ=23	GT:PL:DP:DV:SP:DP4	0/1:173,0,134:35:26:9:2,7,14,12	0/1:184,0,172:36:21:11:2,13,9,12
Locus_2_Transcript_363/4817_Confidence_1.000_Length_227	171	.	A	G	366	PASS	DP=96;VDB=3.46437e-14;SGB=-1.38611;RPB=0.986974;MQB=0.0126107;MQSB=0.478875;BQB=0.937941;MQ0F=0.0520833;ICB=0.3;HOB=0.125;AC=3;AN=4;DP4=2,8,24,35;MQ=23	GT:PL:DP:DV:SP:DP4	1/1:212,8,0:34:31:0:1,2,15,16	0/1:218,0,81:35:28:2:1,6,9,19
Locus_2_Transcript_364/4817_Confidence_1.000_Length_215	98	.	A	G	76	PASS	DP=28;VDB=0.000288618;SGB=-4.72235;RPB=0.0404015;MQB=0.0657285;BQB=1;MQ0F=0.142857;ICB=0.5;HOB=0.5;AC=2;AN=4;DP4=5,0,9,0;MQ=30	GT:PL:DP:DV:SP:DP4	0/1:111,0,24:6:5:0:1,0,5,0	0/1:28,0,109:8:4:0:4,0,4,0
Locus_2_Transcript_369/4817_Confidence_1.000_Length_273	136	.	C	T	222	PASS	DP=35;VDB=0.739018;SGB=-5.33677;RPB=0.30614;MQB=0.944319;MQSB=0.951579;BQB=0.970151;MQ0F=0;ICB=0.5;HOB=0.5;AC=2;AN=4;DP4=9,3,8,3;MQ=40	GT:PL:DP:DV:SP:DP4	0/1:146,0,62:8:5:0:2,1,4,1	0/1:139,0,184:15:6:0:7,2,4,2
Locus_2_Transcript_369/4817_Confidence_1.000_Length_273	143	.	G	A	223	PASS	DP=38;VDB=0.713674;SGB=-5.33677;RPB=0.135826;MQB=0.955682;MQSB=0.817158;BQB=0.908551;MQ0F=0;ICB=0.5;HOB=0.5;AC=2;AN=4;DP4=10,4,8,3;MQ=38	GT:PL:DP:DV:SP:DP4	0/1:146,0,62:8:5:0:2,1,4,1	0/1:140,0,226:17:6:0:8,3,4,2
Locus_2_Transcript_370/4817_Confidence_1.000_Length_304	205	.	A	G	226	PASS	DP=120;VDB=0.28773;SGB=-8.0987;RPB=0.50317;MQB=0.0853635;MQSB=0.555719;BQB=0.929031;MQ0F=0.15;ICB=0.5;HOB=0.5;AC=2;AN=4;DP4=40,6,15,5;MQ=28	GT:PL:DP:DV:SP:DP4	0/1:63,0,183:26:5:0:18,3,4,1	0/1:227,0,201:40:15:4:22,3,11,4
Locus_2_Transcript_370/4817_Confidence_1.000_Length_304	254	.	G	A	194	PASS	DP=84;VDB=2.00319e-05;SGB=-7.48499;RPB=0.670134;MQB=0.256711;MQSB=0.955088;BQB=0.819184;MQ0F=0.154762;ICB=0.5;HOB=0.5;AC=2;AN=4;DP4=21,17,7,11;MQ=28	GT:PL:DP:DV:SP:DP4	0/1:75,0,212:22:5:2:10,7,4,1	0/1:183,0,255:34:13:8:11,10,3,10
Locus_2_Transcript_372/4817_Confidence_1.000_Length_242	125	.	C	T	91	PASS	DP=117;VDB=0.520343;SGB=6.07412;RPB=1;MQB=0.00623908;MQSB=0.5;BQB=0.930271;MQ0F=0.0683761;ICB=0.3;HOB=0.125;AC=1;AN=4;DP4=50,2,11,0;MQ=31	GT:PL:DP:DV:SP:DP4	0/1:155,0,155:33:11:0:22,0,11,0	0/0:0,90,255:30:0:0:28,2,0,0
Locus_2_Transcript_373/4817_Confidence_1.000_Length_724	73	.	T	C	96	PASS	DP=69;VDB=0.00648063;SGB=-7.17793;RPB=0.958088;MQB=0.680216;BQB=0.14134;MQ0F=0.057971;ICB=0.3;HOB=0.125;AC=1;AN=4;DP4=28,0,17,0;MQ=31	GT:PL:DP:DV:SP:DP4	0/1:161,0,84:21:15:0:6,0,15,0	0/0:0,38,186:24:2:0:22,0,2,0
Locus_2_Transcript_373/4817_Confidence_1.000_Length_724	206	.	G	A	80	PASS	DP=110;VDB=0.0441085;SGB=6.07412;RPB=0.0890051;MQB=0.248251;MQSB=0.946646;BQB=0.993082;MQ0F=0.0545455;ICB=0.3;HOB=0.125;AC=1;AN=4;DP4=54,20,10,1;MQ=33	GT:PL:DP:DV:SP:DP4	0/1:144,0,255:41:11:2:24,6,10,1	0/0:0,132,255:44:0:0:30,14,0,0
Locus_2_Transcript_373/4817_Confidence_1.000_Length_724	236	.	C	T	71	PASS	DP=121;VDB=0.0335384;SGB=6.76576;RPB=0.0719359;MQB=0.928488;MQSB=0.101613;BQB=0.318568;MQ0F=0.0495868;ICB=0.3;HOB=0.125;AC=1;AN=4;DP4=58,24,10,2;MQ=34	GT:PL:DP:DV:SP:DP4	0/0:0,141,255:47:0:0:35,12,0,0	0/1:136,0,255:47:12:5:23,12,10,2
Locus_2_Transcript_373/4817_Confidence_1.000_Length_724	261	.	T	G	446	PASS	DP=137;VDB=0.741877;SGB=-21.9071;RPB=0.418381;MQB=0.0387823;MQSB=0.047666;BQB=0.477243;MQ0F=0.0437956;ICB=0.5;HOB=0.5;AC=2;AN=4;DP4=30,11,38,27;MQ=35	GT:PL:DP:DV:SP:DP4	0/1:255,0,195:51:35:5:12,4,20,15	0/1:255,0,255:55:30:4:18,7,18,12
Locus_2_Transcript_373/4817_Confidence_1.000_Length_724	333	.	T	C	191	PASS	DP=132;VDB=0.0535204;SGB=12.3071;RPB=0.868082;MQB=0.63174;MQSB=0.0924205;BQB=0.914922;MQ0F=0.030303;ICB=0.3;HOB=0.125;AC=1;AN=4;DP4=46,25,15,5;MQ=38	GT:PL:DP:DV:SP:DP4	0/0:0,102,255:34:0:0:20,14,0,0	0/1:255,0,255:57:20:1:26,11,15,5
Locus_2_Transcript_373/4817_Confidence_1.000_Length_724	407	.	C	G	386	PASS	DP=108;VDB=0.636172;SGB=3.93485;RPB=0.927951;MQB=0.12695;MQSB=0.658553;BQB=0.666721;MQ0F=0.00925926;ICB=0.3;HOB=0.125;AC=3;AN=4;DP4=8,8,37,30;MQ=36	GT:PL:DP:DV:SP:DP4	0/1:194,0,232:20:10:0:5,5,6,4	1/1:255,3,0:63:57:0:3,3,31,26
Locus_2_Transcript_373/4817_Confidence_1.000_Length_724	424	.	A	G	447	PASS	DP=119;VDB=0.745469;SGB=-14.2358;RPB=0.113293;MQB=0.0964045;MQSB=0.0681593;BQB=0.503519;MQ0F=0.00840336;ICB=0.5;HOB=0.5;AC=2;AN=4;DP4=35,16,17,23;MQ=35	GT:PL:DP:DV:SP:DP4	0/1:255,0,151:22:13:0:5,4,6,7	0/1:255,0,255:69:27:19:30,12,11,16
Locus_2_Transcript_373/4817_Confidence_1.000_Length_724	573	.	A	G	176	PASS	DP=128;VDB=0.316565;SGB=20.6245;RPB=0.927682;MQB=0.288505;MQSB=0.00535051;BQB=0.879661;MQ0F=0.03125;ICB=0.3;HOB=0.125;AC=1;AN=4;DP4=41,24,19,13;MQ=28	GT:PL:DP:DV:SP:DP4	0/0:0,69,255:23:0:0:13,10,0,0	0/1:240,0,255:74:32:2:28,14,19,13
Locus_2_Transcript_373/4817_Confidence_1.000_Length_724	574	.	A	G	89	PASS	DP=132;VDB=0.835196;SGB=13.0002;RPB=0.940468;MQB=0.265234;MQSB=0.00535051;BQB=0.999655;MQ0F=0.030303;ICB=0.3;HOB=0.125;AC=1;AN=4;DP4=47,29,13,8;MQ=28	GT:PL:DP:DV:SP:DP4	0/0:0,69,255:23:0:0:13,10,0,0	0/1:154,0,255:74:21:0:34,19,13,8
Locus_2_Transcript_374/4817_Confidence_1.000_Length_517	114	.	A	G	61	PASS	DP=185;VDB=0.820274;SGB=-8.71241;RPB=0.632585;MQB=0.796965;BQB=0.970362;MQ0F=0.0216216;ICB=0.3;HOB=0.125;AC=1;AN=4;DP4=96,0,22,0;MQ=37	GT:PL:DP:DV:SP:DP4	0/0:0,6,138:53:5:0:48,0,5,0	0/1:125,0,172:65:17:0:48,0,17,0
Locus_2_Transcript_374/4817_Confidence_1.000_Length_517	154	.	G	A	191	PASS	DP=189;VDB=0.395767;SGB=27.556;RPB=0.282583;MQB=0.276221;MQSB=0.918822;BQB=0.877634;MQ0F=0.015873;ICB=0.3;HOB=0.125;AC=1;AN=4;DP4=72,21,39,3;MQ=38	GT:PL:DP:DV:SP:DP4	0/0:0,172,255:57:0:0:51,6,0,0	0/1:255,0,255:78:42:34:21,15,39,3
Locus_2_Transcript_375/4817_Confidence_1.000_Length_563	82	.	C	T	98	PASS	DP=122;VDB=0.423187;SGB=-9.32613;RPB=0.295395;MQB=0.0797676;BQB=0.989159;MQ0F=0.114754;ICB=0.5;HOB=0.5;AC=2;AN=4;DP4=51,0,24,0;MQ=28	GT:PL:DP:DV:SP:DP4	0/1:107,0,155:28:11:0:17,0,11,0	0/1:57,0,167:47:13:0:34,0,13,0
Locus_2_Transcript_375/4817_Confidence_1.000_Length_563	105	.	T	C	128	PASS	DP=136;VDB=0.859915;SGB=-11.4741;RPB=0.548729;MQB=0.012418;BQB=0.945989;MQ0F=0.102941;ICB=0.5;HOB=0.5;AC=2;AN=4;DP4=54,0,31,0;MQ=28	GT:PL:DP:DV:SP:DP4	0/1:128,0,152:31:14:0:17,0,14,0	0/1:65,0,170:54:17:0:37,0,17,0
Locus_2_Transcript_375/4817_Confidence_1.000_Length_563	130	.	G	A	143	PASS	DP=133;VDB=0.0337644;SGB=21.3177;RPB=0.457973;MQB=0.888188;MQSB=0.00510493;BQB=0.250684;MQ0F=0.037594;ICB=0.3;HOB=0.125;AC=1;AN=4;DP4=46,9,31,2;MQ=27	GT:PL:DP:DV:SP:DP4	0/0:0,90,248:30:0:0:28,2,0,0	0/1:207,0,159:58:33:15:18,7,31,2
Locus_2_Transcript_375/4817_Confidence_1.000_Length_563	286	.	A	C	83	PASS	DP=222;VDB=0.993695;SGB=-14.8495;RPB=0.890466;MQB=7.08381e-08;MQSB=0.0146742;BQB=0.0677189;MQ0F=0;ICB=0.3;HOB=0.125;AC=1;AN=4;DP4=106,20,37,5;MQ=28	GT:PL:DP:DV:SP:DP4	0/1:147,0,168:61:33:1:25,3,28,5	0/0:0,142,255:107:9:5:81,17,9,0
Locus_2_Transcript_375/4817_Confidence_1.000_Length_563	307	.	T	A	97	PASS	DP=267;VDB=0.575845;SGB=-13.6221;RPB=0.776586;MQB=0.000520644;MQSB=0.0108789;BQB=0.0695658;MQ0F=0.00749064;ICB=0.3;HOB=0.125;AC=1;AN=4;DP4=110,27,33,5;MQ=30	GT:PL:DP:DV:SP:DP4	0/1:161,0,255:66:28:1:33,5,23,5	0/0:0,101,255:109:10:7:77,22,10,0
Locus_2_Transcript_375/4817_Confidence_1.000_Length_563	316	.	G	A	401	PASS	DP=251;VDB=0.00172166;SGB=-32.9538;RPB=0.961163;MQB=0.00137084;MQSB=0.00161942;BQB=1.60121e-05;MQ0F=0.00796813;ICB=0.3;HOB=0.125;AC=3;AN=4;DP4=46,25,81,20;MQ=31	GT:PL:DP:DV:SP:DP4	1/1:255,196,0:65:65:0:0,0,55,10	0/1:211,0,255:107:36:3:46,25,26,10
Locus_2_Transcript_376/4817_Confidence_1.000_Length_355	183	.	C	T	124	PASS	DP=331;VDB=2.17903e-05;SGB=26.8628;RPB=0.782088;MQB=0.00711752;MQSB=7.94354e-09;BQB=0.11821;MQ0F=0.0181269;ICB=0.3;HOB=0.125;AC=1;AN=4;DP4=140,53,28,13;MQ=29	GT:PL:DP:DV:SP:DP4	0/1:188,0,255:109:41:2:50,18,28,13	0/0:0,255,255:125:0:0:90,35,0,0
Locus_2_Transcript_376/4817_Confidence_1.000_Length_355	198	.	T	C	190	PASS	DP=305;VDB=1.66526e-05;SGB=-27.1236;RPB=0.9762;MQB=0.00272236;MQSB=1.62161e-06;BQB=0.850035;MQ0F=0.0229508;ICB=0.3;HOB=0.125;AC=1;AN=4;DP4=87,60,50,32;MQ=30	GT:PL:DP:DV:SP:DP4	0/1:255,0,217:107:72:0:22,13,44,28	0/0:0,141,255:122:10:0:65,47,6,4
Locus_2_Transcript_376/4817_Confidence_1.000_Length_355	277	.	A	T	158	PASS	DP=186;VDB=0.00289923;SGB=-11.4741;RPB=0.427926;MQB=0.00326805;MQSB=0.54183;BQB=0.0488287;MQ0F=0.016129;ICB=0.3;HOB=0.125;AC=1;AN=4;DP4=23,94,14,17;MQ=32	GT:PL:DP:DV:SP:DP4	0/1:223,0,255:71:25:16:8,38,11,14	0/0:0,165,255:77:6:9:15,56,3,3
Locus_2_Transcript_376/4817_Confidence_1.000_Length_355	316	.	T	C	311	PASS	DP=111;VDB=2.92357e-12;SGB=-21.6002;RPB=0.128789;MQB=0.175575;MQSB=0.0702649;BQB=0.967644;MQ0F=0;ICB=0.3;HOB=0.125;AC=3;AN=4;DP4=6,26,8,56;MQ=34	GT:PL:DP:DV:SP:DP4	1/1:255,141,0:47:47:0:0,0,6,41	0/1:120,0,255:49:17:2:6,26,2,15
Locus_2_Transcript_376/4817_Confidence_1.000_Length_355	320	.	T	C	364	PASS	DP=107;VDB=2.19043e-15;SGB=-20.6797;RPB=0.228414;MQB=0.984998;MQSB=0.121761;BQB=0.458154;MQ0F=0;ICB=0.3;HOB=0.125;AC=3;AN=4;DP4=2,30,9,52;MQ=34	GT:PL:DP:DV:SP:DP4	0/1:173,0,214:47:16:2:2,29,2,14	1/1:255,122,0:46:45:0:0,1,7,38
Locus_2_Transcript_377/4817_Confidence_1.000_Length_203	17	.	A	G	138	PASS	DP=18;VDB=6.90244e-07;SGB=-1.20005;MQ0F=0.166667;AC=4;AN=4;DP4=0,0,11,0;MQ=22	GT:PL:DP:DV:SP:DP4	1/1:112,15,0:5:5:0:0,0,5,0	1/1:80,18,0:6:6:0:0,0,6,0
Locus_2_Transcript_377/4817_Confidence_1.000_Length_203	61	.	G	A	266	PASS	DP=43;VDB=0.00980725;SGB=-1.3763;RPB=1;MQB=1;MQSB=1;BQB=1;MQ0F=0.116279;AC=4;AN=4;DP4=0,1,30,0;MQ=24	GT:PL:DP:DV:SP:DP4	1/1:189,45,0:15:15:0:0,0,15,0	1/1:131,36,0:16:15:0:0,1,15,0
Locus_2_Transcript_377/4817_Confidence_1.000_Length_203	83	.	T	C	260	PASS	DP=60;VDB=0.024512;SGB=-1.37394;RPB=0.285235;MQB=0.0831208;BQB=0.874808;MQ0F=0.133333;AC=4;AN=4;DP4=3,0,29,0;MQ=24	GT:PL:DP:DV:SP:DP4	1/1:185,25,0:16:15:0:1,0,15,0	1/1:130,27,0:16:14:0:2,0,14,0
Locus_2_Transcript_377/4817_Confidence_1.000_Length_203	137	.	A	G	272	PASS	DP=47;VDB=1.01773e-06;SGB=-1.36128;RPB=1;MQB=1;MQSB=0.410611;BQB=1;MQ0F=0.106383;AC=4;AN=4;DP4=1,0,20,4;MQ=23	GT:PL:DP:DV:SP:DP4	1/1:195,16,0:13:12:0:1,0,10,2	1/1:132,36,0:12:12:0:0,0,10,2
Locus_2_Transcript_377/4817_Confidence_1.000_Length_203	185	.	A	G	177	PASS	DP=21;VDB=1.09578e-07;SGB=-1.32971;RPB=1;MQB=1;MQSB=1;BQB=1;MQ0F=0.142857;AC=4;AN=4;DP4=0,1,1,18;MQ=22	GT:PL:DP:DV:SP:DP4	1/1:162,10,0:11:10:0:0,1,1,9	1/1:70,27,0:9:9:0:0,0,0,9
Locus_2_Transcript_379/4817_Confidence_1.000_Length_403	344	.	A	C	116	PASS	DP=61;VDB=0.00328723;SGB=-9.0192;RPB=0.917895;MQB=7.90578e-05;MQSB=0.39985;BQB=0.388167;MQ0F=0;ICB=0.5;HOB=0.5;AC=2;AN=4;DP4=5,15,13,10;MQ=24	GT:PL:DP:DV:SP:DP4	1/1:185,66,0:22:22:0:0,0,13,9	0/0:0,49,255:21:1:0:5,15,0,1
Locus_2_Transcript_380/4817_Confidence_1.000_Length_1056	78	.	C	T	143	PASS	DP=112;VDB=0.0035777;SGB=21.3177;RPB=0.304248;MQB=0.548325;BQB=0.661101;MQ0F=0.0535714;ICB=0.5;HOB=0.5;AC=2;AN=4;DP4=39,0,33,0;MQ=31	GT:PL:DP:DV:SP:DP4	0/0:0,114,210:38:0:0:38,0,0,0	1/1:212,86,0:34:33:0:1,0,33,0
Locus_2_Transcript_380/4817_Confidence_1.000_Length_1056	148	.	C	T	191	PASS	DP=157;VDB=0.64711;SGB=24.0903;RPB=0.935032;MQB=0.853632;MQSB=3.6743e-07;BQB=0.988298;MQ0F=0.0191083;ICB=0.3;HOB=0.125;AC=1;AN=4;DP4=60,23,31,6;MQ=37	GT:PL:DP:DV:SP:DP4	0/0:0,181,255:60:0:0:44,16,0,0	0/1:255,0,235:60:37:7:16,7,31,6
Locus_2_Transcript_380/4817_Confidence_1.000_Length_1056	157	.	G	T	191	PASS	DP=148;VDB=0.849197;SGB=19.9314;RPB=0.618959;MQB=0.528564;MQSB=0.00335348;BQB=0.936627;MQ0F=0;ICB=0.3;HOB=0.125;AC=1;AN=4;DP4=71,14,22,9;MQ=39	GT:PL:DP:DV:SP:DP4	0/1:255,0,227:56:31:11:23,2,22,9	0/0:0,181,255:60:0:0:48,12,0,0
Locus_2_Transcript_380/4817_Confidence_1.000_Length_1056	333	.	G	C	191	PASS	DP=214;VDB=0.715688;SGB=28.9423;RPB=0.52077;MQB=0.999114;MQSB=0.491524;BQB=0.209897;MQ0F=0.00934579;ICB=0.3;HOB=0.125;AC=1;AN=4;DP4=76,52,27,17;MQ=40	GT:PL:DP:DV:SP:DP4	0/1:255,0,255:99:44:4:39,16,27,17	0/0:0,220,255:73:0:0:37,36,0,0
Locus_2_Transcript_380/4817_Confidence_1.000_Length_1056	338	.	G	A	191	PASS	DP=218;VDB=0.999602;SGB=37.26;RPB=0.918884;MQB=0.986965;MQSB=0.471656;BQB=0.941309;MQ0F=0.00917431;ICB=0.3;HOB=0.125;AC=1;AN=4;DP4=69,51,39,17;MQ=40	GT:PL:DP:DV:SP:DP4	0/1:255,0,255:102:56:5:27,19,39,17	0/0:0,223,255:74:0:0:42,32,0,0
Locus_2_Transcript_380/4817_Confidence_1.000_Length_1056	402	.	C	T	447	PASS	DP=236;VDB=0.00653905;SGB=-27.1236;RPB=0.0814413;MQB=0.652572;MQSB=0.521787;BQB=0.685742;MQ0F=0.0127119;ICB=0.5;HOB=0.5;AC=2;AN=4;DP4=66,27,43,39;MQ=39	GT:PL:DP:DV:SP:DP4	0/1:255,0,255:102:42:9:46,14,26,16	0/1:255,0,255:73:40:8:20,13,17,23
Locus_2_Transcript_380/4817_Confidence_1.000_Length_1056	481	.	C	A	191	PASS	DP=144;VDB=0.994295;SGB=22.0108;RPB=0.993171;MQB=0.695527;MQSB=0.546264;BQB=0.230779;MQ0F=0.00694444;ICB=0.3;HOB=0.125;AC=1;AN=4;DP4=45,48,20,14;MQ=40	GT:PL:DP:DV:SP:DP4	0/1:255,0,255:68:34:0:20,14,20,14	0/0:0,178,255:59:0:0:25,34,0,0
Locus_2_Transcript_380/4817_Confidence_1.000_Length_1056	573	.	C	T	191	PASS	DP=195;VDB=0.267636;SGB=16.4657;RPB=0.997412;MQB=0.967223;MQSB=0.964709;BQB=0.512169;MQ0F=0.0153846;ICB=0.3;HOB=0.125;AC=1;AN=4;DP4=86,38,21,5;MQ=41	GT:PL:DP:DV:SP:DP4	0/0:0,253,255:84:0:0:57,27,0,0	0/1:255,0,255:66:26:3:29,11,21,5
Locus_2_Transcript_380/4817_Confidence_1.000_Length_1056	734	.	C	T	191	PASS	DP=259;VDB=0.424967;SGB=34.4875;RPB=0.778582;MQB=0.416913;MQSB=0.454128;BQB=0.998704;MQ0F=0.019305;ICB=0.3;HOB=0.125;AC=1;AN=4;DP4=96,54,33,19;MQ=39	GT:PL:DP:DV:SP:DP4	0/1:255,0,255:99:52:3:33,14,33,19	0/0:0,255,255:103:0:0:63,40,0,0
Locus_2_Transcript_380/4817_Confidence_1.000_Length_1056	923	.	G	A	191	PASS	DP=204;VDB=1.00159e-07;SGB=24.7834;RPB=0.185146;MQB=1;MQSB=7.13096e-10;BQB=0.988384;MQ0F=0.0294118;ICB=0.3;HOB=0.125;AC=1;AN=4;DP4=44,63,17,21;MQ=32	GT:PL:DP:DV:SP:DP4	0/1:255,0,255:67:38:0:13,16,17,21	0/0:0,235,255:78:0:0:31,47,0,0
Locus_2_Transcript_380/4817_Confidence_1.000_Length_1056	925	.	G	C	191	PASS	DP=200;VDB=1.21543e-07;SGB=24.7834;RPB=0.0950816;MQB=1;MQSB=1.20037e-08;BQB=0.935838;MQ0F=0.03;ICB=0.3;HOB=0.125;AC=1;AN=4;DP4=40,67,17,21;MQ=32	GT:PL:DP:DV:SP:DP4	0/1:255,0,255:67:38:0:13,16,17,21	0/0:0,235,255:78:0:0:27,51,0,0
Locus_2_Transcript_380/4817_Confidence_1.000_Length_1056	928	.	G	A	191	PASS	DP=198;VDB=3.92657e-08;SGB=-17.6112;RPB=0.0562842;MQB=0.000547789;MQSB=2.66888e-09;BQB=0.75901;MQ0F=0.0353535;ICB=0.3;HOB=0.125;AC=1;AN=4;DP4=37,52,20,31;MQ=32	GT:PL:DP:DV:SP:DP4	0/1:255,0,255:66:37:0:13,16,17,20	0/0:0,71,255:74:14:6:24,36,3,11
Locus_2_Transcript_380/4817_Confidence_1.000_Length_1056	1004	.	C	T	133	PASS	DP=71;VDB=5.12487e-08;SGB=15.7726;RPB=0.265035;MQB=0.0263077;MQSB=0.171287;BQB=0.94696;MQ0F=0.0704225;ICB=0.3;HOB=0.125;AC=1;AN=4;DP4=6,32,2,23;MQ=28	GT:PL:DP:DV:SP:DP4	0/0:0,78,253:26:0:0:4,22,0,0	0/1:198,0,67:37:25:2:2,10,2,23
Locus_2_Transcript_382/4817_Confidence_1.000_Length_221	80	.	T	C	308	PASS	DP=1182;VDB=4.09226e-13;SGB=-1.38629;RPB=0.0258017;MQB=0.089239;MQSB=1;BQB=0.257415;MQ0F=0.00507614;AC=4;AN=4;DP4=101,0,601,1;MQ=34	GT:PL:DP:DV:SP:DP4	1/1:157,60,0:345:283:0:62,0,282,1	1/1:207,255,0:358:319:0:39,0,319,0
Locus_2_Transcript_382/4817_Confidence_1.000_Length_221	132	.	C	G	442	PASS	DP=1315;VDB=7.13848e-15;SGB=-1.38629;RPB=0.406568;MQB=0.00114545;MQSB=2.43715e-07;BQB=0.644753;MQ0F=0.00456274;ICB=0.5;HOB=0.5;AC=2;AN=4;DP4=89,39,457,127;MQ=34	GT:PL:DP:DV:SP:DP4	0/1:255,0,51:348:279:2:54,15,226,53	0/1:255,0,11:364:305:18:35,24,231,74
Locus_2_Transcript_382/4817_Confidence_1.000_Length_221	156	.	G	C	390	PASS	DP=983;VDB=6.28754e-19;SGB=-59.0363;RPB=0.973742;MQB=0.00351393;MQSB=0.542539;BQB=0.62602;MQ0F=0.00406918;ICB=0.5;HOB=0.5;AC=2;AN=4;DP4=237,210,111,75;MQ=34	GT:PL:DP:DV:SP:DP4	0/1:253,0,255:304:94:10:123,87,65,29	0/1:202,0,255:329:92:1:114,123,46,46
Locus_2_Transcript_382/4817_Confidence_1.000_Length_221	165	.	T	C	447	PASS	DP=898;VDB=2.29421e-30;SGB=-90.949;RPB=0.982543;MQB=0.431317;MQSB=0.151079;BQB=0.862493;MQ0F=0.00445434;ICB=0.5;HOB=0.5;AC=2;AN=4;DP4=138,197,137,153;MQ=34	GT:PL:DP:DV:SP:DP4	0/1:255,0,255:302:134:9:74,94,71,63	0/1:255,0,255:323:156:3:64,103,66,90
Locus_2_Transcript_382/4817_Confidence_1.000_Length_221	206	.	G	A	303	PASS	DP=330;VDB=5.54438e-32;SGB=-29.2716;RPB=0.209131;MQB=0.904962;MQSB=0.000280922;BQB=0.0549639;MQ0F=0.0121212;ICB=0.5;HOB=0.5;AC=2;AN=4;DP4=38,149,14,75;MQ=31	GT:PL:DP:DV:SP:DP4	0/1:167,0,255:148:49:0:17,82,8,41	0/1:201,0,255:128:40:5:21,67,6,34
Locus_2_Transcript_383/4817_Confidence_1.000_Length_715	57	.	G	A	95	PASS	DP=32;VDB=0.0267105;SGB=-4.72235;RPB=0.409892;MQB=0.208926;BQB=0.817727;MQ0F=0;ICB=0.3;HOB=0.125;AC=3;AN=4;DP4=13,0,9,0;MQ=35	GT:PL:DP:DV:SP:DP4	1/1:91,12,0:4:4:0:0,0,4,0	0/1:68,0,166:18:5:0:13,0,5,0
Locus_2_Transcript_383/4817_Confidence_1.000_Length_715	231	.	A	G	191	PASS	DP=38;VDB=0.392702;SGB=8.84268;RPB=0.242449;MQB=1;MQSB=1;BQB=0.0762218;MQ0F=0;ICB=0.3;HOB=0.125;AC=1;AN=4;DP4=12,0,9,6;MQ=42	GT:PL:DP:DV:SP:DP4	0/0:0,12,128:4:0:0:4,0,0,0	0/1:255,0,129:23:15:12:8,0,9,6
Locus_2_Transcript_383/4817_Confidence_1.000_Length_715	364	.	C	T	182	PASS	DP=41;VDB=0.486279;SGB=-6.25703;RPB=0.0250097;MQB=1;MQSB=1;BQB=0.0999375;MQ0F=0;ICB=0.3;HOB=0.125;AC=3;AN=4;DP4=14,4,9,5;MQ=42	GT:PL:DP:DV:SP:DP4	1/1:48,6,0:2:2:0:0,0,0,2	0/1:197,0,255:30:12:0:14,4,9,3
Locus_2_Transcript_383/4817_Confidence_1.000_Length_715	499	.	G	T	84	PASS	DP=59;VDB=0.439806;SGB=-5.0263;RPB=0.738819;MQB=0.792218;MQSB=0.195844;BQB=0.919568;MQ0F=0;ICB=0.3;HOB=0.125;AC=1;AN=4;DP4=23,12,7,3;MQ=39	GT:PL:DP:DV:SP:DP4	0/0:0,3,159:9:1:0:8,0,1,0	0/1:148,0,255:36:9:2:15,12,6,3
Locus_2_Transcript_384/4817_Confidence_1.000_Length_615	111	.	T	G	243	PASS	DP=71;VDB=0.880889;SGB=-0.0570268;RPB=0.449148;MQB=0.0839194;BQB=0.337733;MQ0F=0.0704225;ICB=0.5;HOB=0.5;AC=2;AN=4;DP4=8,0,34,0;MQ=32	GT:PL:DP:DV:SP:DP4	0/1:145,0,16:9:7:0:2,0,7,0	0/1:167,0,32:33:27:0:6,0,27,0
Locus_2_Transcript_384/4817_Confidence_1.000_Length_615	192	.	C	T	81	PASS	DP=75;VDB=0.298692;SGB=-4.09964;RPB=0.108484;MQB=0.721792;MQSB=0.147077;BQB=0.83417;MQ0F=0.0666667;ICB=0.3;HOB=0.125;AC=1;AN=4;DP4=26,18,6,1;MQ=34	GT:PL:DP:DV:SP:DP4	0/1:145,0,118:11:6:6:2,3,5,1	0/0:0,96,255:40:1:0:24,15,1,0
Locus_2_Transcript_384/4817_Confidence_1.000_Length_615	268	.	C	T	61	PASS	DP=46;VDB=0.00187095;SGB=1.94933;RPB=0.738577;MQB=0.873995;MQSB=0.914783;BQB=0.0653974;MQ0F=0;ICB=0.3;HOB=0.125;AC=1;AN=4;DP4=14,13,5,0;MQ=40	GT:PL:DP:DV:SP:DP4	0/1:125,0,142:10:5:8:2,3,5,0	0/0:0,66,255:22:0:0:12,10,0,0
Locus_2_Transcript_384/4817_Confidence_1.000_Length_615	493	.	C	A	92	PASS	DP=45;VDB=0.248351;SGB=-4.10598;RPB=0.78729;MQB=0.675814;MQSB=1;BQB=0.917505;MQ0F=0.0444444;ICB=0.5;HOB=0.5;AC=2;AN=4;DP4=16,4,5,2;MQ=33	GT:PL:DP:DV:SP:DP4	0/1:89,0,89:7:3:8:4,0,1,2	0/1:67,0,245:20:4:3:12,4,4,0
Locus_2_Transcript_385/4817_Confidence_1.000_Length_206	97	.	C	T	95	PASS	DP=66;VDB=0.000206768;SGB=-8.09853;RPB=0.375277;MQB=0.0979994;BQB=0.971731;MQ0F=0.121212;ICB=0.5;HOB=0.5;AC=2;AN=4;DP4=13,0,20,0;MQ=24	GT:PL:DP:DV:SP:DP4	0/1:22,0,98:6:1:0:5,0,1,0	0/1:137,0,115:27:19:0:8,0,19,0
Locus_2_Transcript_385/4817_Confidence_1.000_Length_206	98	.	C	G	172	PASS	DP=66;VDB=3.71173e-06;SGB=0.0539066;RPB=0.297903;MQB=0.279511;BQB=0.935966;MQ0F=0.121212;ICB=0.5;HOB=0.5;AC=2;AN=4;DP4=9,0,24,0;MQ=24	GT:PL:DP:DV:SP:DP4	0/1:107,0,10:6:4:0:2,0,4,0	0/1:130,0,98:27:20:0:7,0,20,0
Locus_2_Transcript_385/4817_Confidence_1.000_Length_206	115	.	T	C	114	PASS	DP=65;VDB=0.0142115;SGB=-8.40556;RPB=0.938755;MQB=0.0239499;MQSB=1;BQB=0.925699;MQ0F=0.123077;ICB=0.5;HOB=0.5;AC=2;AN=4;DP4=11,1,21,0;MQ=24	GT:PL:DP:DV:SP:DP4	0/1:98,0,22:6:5:0:1,0,5,0	0/1:80,0,156:27:16:0:10,1,16,0
Locus_2_Transcript_385/4817_Confidence_1.000_Length_206	133	.	T	G	114	PASS	DP=52;VDB=0.000696291;SGB=-5.3356;RPB=0.464383;MQB=0.282725;MQSB=0.0671455;BQB=0.264541;MQ0F=0.0769231;ICB=0.5;HOB=0.5;AC=2;AN=4;DP4=11,9,10,1;MQ=24	GT:PL:DP:DV:SP:DP4	0/1:56,0,75:6:2:0:4,0,2,0	0/1:121,0,149:25:9:14:7,9,8,1
Locus_2_Transcript_386/4817_Confidence_1.000_Length_298	188	.	G	C	116	PASS	DP=97;VDB=0.00491932;SGB=-0.419941;RPB=0.998774;MQB=0.0113983;MQSB=0.410314;BQB=0.947978;MQ0F=0.14433;ICB=0.5;HOB=0.5;AC=2;AN=4;DP4=11,2,32,10;MQ=21	GT:PL:DP:DV:SP:DP4	0/1:25,0,51:13:10:0:3,0,8,2	0/1:155,0,166:42:32:0:8,2,24,8
Locus_2_Transcript_387/4817_Confidence_1.000_Length_231	145	.	T	C	148	PASS	DP=34;VDB=0.157649;SGB=-1.19055;RPB=0.603142;MQB=0.759945;MQSB=0.918481;BQB=0.987474;MQ0F=0.176471;ICB=0.3;HOB=0.125;AC=3;AN=4;DP4=2,1,12,5;MQ=19	GT:PL:DP:DV:SP:DP4	1/1:76,18,0:6:6:0:0,0,5,1	0/1:137,0,22:14:11:0:2,1,7,4
Locus_2_Transcript_388/4817_Confidence_1.000_Length_257	203	.	C	T	177	PASS	DP=48;VDB=1.59987e-08;SGB=-1.36519;MQSB=0.221735;MQ0F=0.0208333;AC=4;AN=4;DP4=0,0,18,12;MQ=13	GT:PL:DP:DV:SP:DP4	1/1:90,39,0:13:13:0:0,0,11,2	1/1:141,51,0:17:17:0:0,0,7,10
Locus_2_Transcript_389/4817_Confidence_1.000_Length_239	195	.	A	C	217	PASS	DP=67;VDB=0.000169991;SGB=-7.485;RPB=0.928679;MQB=0.986724;MQSB=0.389383;BQB=0.961855;MQ0F=0.0298507;ICB=0.5;HOB=0.5;AC=2;AN=4;DP4=10,24,5,13;MQ=33	GT:PL:DP:DV:SP:DP4	0/1:178,0,171:20:11:2:3,6,2,9	0/1:103,0,255:32:7:2:7,18,3,4
Locus_2_Transcript_390/4817_Confidence_1.000_Length_517	13	.	A	C	81	PASS	DP=23;VDB=5.05221e-06;SGB=-6.25745;RPB=0.447416;MQB=0.982757;BQB=0.975265;MQ0F=0.391304;ICB=0.3;HOB=0.125;AC=3;AN=4;DP4=7,0,14,0;MQ=19	GT:PL:DP:DV:SP:DP4	1/1:118,23,0:11:10:0:1,0,10,0	0/1:27,0,58:10:4:0:6,0,4,0
Locus_2_Transcript_390/4817_Confidence_1.000_Length_517	131	.	G	A	70	PASS	DP=81;VDB=0.677977;SGB=-6.87123;RPB=0.613745;MQB=0.977546;MQSB=0.0356559;BQB=0.441504;MQ0F=0.111111;ICB=0.5;HOB=0.5;AC=2;AN=4;DP4=26,11,15,1;MQ=28	GT:PL:DP:DV:SP:DP4	0/1:50,0,175:14:4:6:6,4,4,0	0/1:86,0,255:39:12:4:20,7,11,1
Locus_2_Transcript_390/4817_Confidence_1.000_Length_517	165	.	C	T	350	PASS	DP=87;VDB=0.992609;SGB=-13.3152;RPB=0.280442;MQB=0.973003;MQSB=0.00304798;BQB=0.997274;MQ0F=0.091954;ICB=0.5;HOB=0.5;AC=2;AN=4;DP4=10,21,29,8;MQ=30	GT:PL:DP:DV:SP:DP4	0/1:175,0,163:23:12:19:2,9,9,3	0/1:238,0,238:45:25:19:8,12,20,5
Locus_2_Transcript_390/4817_Confidence_1.000_Length_517	166	.	C	T	352	PASS	DP=87;VDB=0.992551;SGB=-13.3152;RPB=0.283203;MQB=0.973003;MQSB=0.00304798;BQB=0.90888;MQ0F=0.091954;ICB=0.5;HOB=0.5;AC=2;AN=4;DP4=10,21,29,8;MQ=30	GT:PL:DP:DV:SP:DP4	0/1:175,0,160:23:12:19:2,9,9,3	0/1:240,0,241:45:25:19:8,12,20,5
Locus_2_Transcript_390/4817_Confidence_1.000_Length_517	172	.	A	G	340	PASS	DP=78;VDB=0.957878;SGB=-13.9289;RPB=0.194418;MQB=0.937098;MQSB=0.000156173;BQB=0.77946;MQ0F=0.0641026;ICB=0.5;HOB=0.5;AC=2;AN=4;DP4=7,15,29,10;MQ=32	GT:PL:DP:DV:SP:DP4	0/1:149,0,152:21:10:27:2,9,9,1	0/1:255,0,171:40:29:6:5,6,20,9
Locus_2_Transcript_390/4817_Confidence_1.000_Length_517	201	.	G	C	248	PASS	DP=65;VDB=0.0384914;SGB=-9.63298;RPB=0.0897133;MQB=0.355045;MQSB=0.394094;BQB=0.74487;MQ0F=0;ICB=0.5;HOB=0.5;AC=2;AN=4;DP4=13,9,24,1;MQ=37	GT:PL:DP:DV:SP:DP4	0/1:125,0,119:16:9:23:2,5,9,0	0/1:186,0,255:31:16:8:11,4,15,1
Locus_2_Transcript_390/4817_Confidence_1.000_Length_517	425	.	T	C	257	PASS	DP=75;VDB=2.06624e-08;SGB=-12.0878;RPB=0.99731;MQB=0.00107504;MQSB=4.51305e-05;BQB=0.176509;MQ0F=0.106667;ICB=0.5;HOB=0.5;AC=2;AN=4;DP4=3,17,18,15;MQ=28	GT:PL:DP:DV:SP:DP4	0/1:151,0,81:18:13:6:0,5,4,9	0/1:169,0,214:35:20:22:3,12,14,6
Locus_2_Transcript_393/4817_Confidence_1.000_Length_1861	108	.	G	A	77	PASS	DP=68;VDB=0.349544;SGB=-7.48497;RPB=0.879651;MQB=0.106661;BQB=0.979692;MQ0F=0.0588235;ICB=0.5;HOB=0.5;AC=2;AN=4;DP4=28,0,18,0;MQ=27	GT:PL:DP:DV:SP:DP4	0/1:49,0,109:12:4:0:8,0,4,0	0/1:92,0,155:34:14:0:20,0,14,0
Locus_2_Transcript_393/4817_Confidence_1.000_Length_1861	341	.	A	G	147	PASS	DP=163;VDB=0.0457787;SGB=-9.01927;RPB=0.525091;MQB=0.472669;MQSB=0.256021;BQB=0.769689;MQ0F=0.134969;ICB=0.5;HOB=0.5;AC=2;AN=4;DP4=60,34,14,9;MQ=27	GT:PL:DP:DV:SP:DP4	0/1:179,0,213:26:10:4:10,6,8,2	0/1:33,0,247:91:13:6:50,28,6,7
Locus_2_Transcript_393/4817_Confidence_1.000_Length_1861	457	.	T	C	249	PASS	DP=95;VDB=0.551983;SGB=-8.09871;RPB=0.127289;MQB=0.929119;MQSB=0.0644828;BQB=0.990483;MQ0F=0.0315789;ICB=0.5;HOB=0.5;AC=2;AN=4;DP4=32,20,10,10;MQ=35	GT:PL:DP:DV:SP:DP4	0/1:209,0,146:19:11:4:5,3,4,7	0/1:104,0,255:53:9:0:27,17,6,3
Locus_2_Transcript_393/4817_Confidence_1.000_Length_1861	563	.	C	T	337	PASS	DP=80;VDB=0.588111;SGB=-10.2467;RPB=0.4226;MQB=0.216265;MQSB=0.991427;BQB=0.411112;MQ0F=0;ICB=0.5;HOB=0.5;AC=2;AN=4;DP4=24,12,18,9;MQ=40	GT:PL:DP:DV:SP:DP4	0/1:145,0,144:13:7:0:5,1,6,1	0/1:255,0,255:50:20:0:19,11,12,8
Locus_2_Transcript_393/4817_Confidence_1.000_Length_1861	571	.	A	C	90	PASS	DP=92;VDB=0.727166;SGB=-5.95055;RPB=0.0549046;MQB=0.263045;MQSB=0.991745;BQB=0.929055;MQ0F=0;ICB=0.5;HOB=0.5;AC=2;AN=4;DP4=35,21,12,1;MQ=40	GT:PL:DP:DV:SP:DP4	0/1:72,0,229:15:4:3:8,3,4,0	0/1:85,0,255:54:9:9:27,18,8,1
Locus_2_Transcript_393/4817_Confidence_1.000_Length_1861	624	.	C	T	89	PASS	DP=86;VDB=0.141978;SGB=6.07412;RPB=0.681791;MQB=0.817044;MQSB=0.753183;BQB=0.498896;MQ0F=0;ICB=0.3;HOB=0.125;AC=1;AN=4;DP4=33,18,9,2;MQ=41	GT:PL:DP:DV:SP:DP4	0/0:0,39,255:13:0:0:6,7,0,0	0/1:154,0,255:49:11:2:27,11,9,2
Locus_2_Transcript_393/4817_Confidence_1.000_Length_1861	678	.	G	A	332	PASS	DP=76;VDB=0.092519;SGB=-8.09871;RPB=0.850721;MQB=0.309786;MQSB=0.999063;BQB=0.997554;MQ0F=0;ICB=0.5;HOB=0.5;AC=2;AN=4;DP4=22,13,12,8;MQ=41	GT:PL:DP:DV:SP:DP4	0/1:183,0,102:11:7:0:1,3,3,4	0/1:212,0,255:44:13:0:21,10,9,4
Locus_2_Transcript_393/4817_Confidence_1.000_Length_1861	948	.	A	G	122	PASS	DP=79;VDB=0.0491895;SGB=-5.33677;RPB=0.673961;MQB=0.768349;MQSB=0.988822;BQB=0.814813;MQ0F=0;ICB=0.5;HOB=0.5;AC=2;AN=4;DP4=27,22,8,3;MQ=41	GT:PL:DP:DV:SP:DP4	0/1:151,0,214:15:6:0:5,4,4,2	0/1:37,0,255:45:5:4:22,18,4,1
Locus_2_Transcript_393/4817_Confidence_1.000_Length_1861	1052	.	C	A	366	PASS	DP=71;VDB=0.0113676;SGB=-9.63298;RPB=0.12483;MQB=0.486752;MQSB=0.952624;BQB=0.987282;MQ0F=0;ICB=0.5;HOB=0.5;AC=2;AN=4;DP4=15,9,12,13;MQ=41	GT:PL:DP:DV:SP:DP4	0/1:177,0,41:11:9:13:2,0,1,8	0/1:253,0,255:38:16:1:13,9,11,5
Locus_2_Transcript_393/4817_Confidence_1.000_Length_1861	1133	.	A	G	131	PASS	DP=79;VDB=0.289336;SGB=-5.94997;RPB=0.945802;MQB=0.636276;MQSB=0.769328;BQB=0.478632;MQ0F=0.0253165;ICB=0.5;HOB=0.5;AC=2;AN=4;DP4=28,13,11,2;MQ=41	GT:PL:DP:DV:SP:DP4	0/1:53,0,87:5:2:0:2,1,2,0	0/1:143,0,255:49:11:3:26,12,9,2
Locus_2_Transcript_393/4817_Confidence_1.000_Length_1861	1246	.	T	A	296	PASS	DP=73;VDB=0.767397;SGB=-12.0878;RPB=0.541199;MQB=0.339988;MQSB=0.803291;BQB=0.988117;MQ0F=0.0136986;ICB=0.5;HOB=0.5;AC=2;AN=4;DP4=12,10,19,14;MQ=39	GT:PL:DP:DV:SP:DP4	0/1:104,0,160:11:4:0:5,2,3,1	0/1:255,0,217:44:29:1:7,8,16,13
Locus_2_Transcript_393/4817_Confidence_1.000_Length_1861	1294	.	T	C	261	PASS	DP=57;VDB=0.126438;SGB=-8.09871;RPB=0.256376;MQB=0.192638;MQSB=0.408761;BQB=0.683671;MQ0F=0;ICB=0.5;HOB=0.5;AC=2;AN=4;DP4=14,10,17,3;MQ=39	GT:PL:DP:DV:SP:DP4	0/1:134,0,133:11:6:3:3,2,5,1	0/1:190,0,255:33:14:9:11,8,12,2
Locus_2_Transcript_393/4817_Confidence_1.000_Length_1861	1758	.	C	G	153	PASS	DP=78;VDB=0.930945;SGB=-8.40553;RPB=0.994858;MQB=0.663705;MQSB=0.264206;BQB=0.984335;MQ0F=0.0128205;ICB=0.5;HOB=0.5;AC=2;AN=4;DP4=13,22,5,16;MQ=27	GT:PL:DP:DV:SP:DP4	0/1:36,0,86:7:3:0:1,3,0,3	0/1:181,0,230:49:18:3:12,19,5,13
Locus_2_Transcript_393/4817_Confidence_1.000_Length_1861	1785	.	A	G	85	PASS	DP=53;VDB=0.00103384;SGB=-6.87069;RPB=0.48519;MQB=0.588973;MQSB=0.167265;BQB=0.778175;MQ0F=0;ICB=0.5;HOB=0.5;AC=2;AN=4;DP4=9,16,3,13;MQ=26	GT:PL:DP:DV:SP:DP4	0/1:11,0,66:5:1:0:0,4,1,0	0/1:138,0,200:36:15:11:9,12,2,13
Locus_2_Transcript_395/4817_Confidence_1.000_Length_1195	378	.	T	C	185	PASS	DP=54;VDB=0.983583;SGB=-5.95055;RPB=0.944331;MQB=0.928705;MQSB=0.88344;BQB=0.495763;MQ0F=0;ICB=0.5;HOB=0.5;AC=2;AN=4;DP4=20,5,9,4;MQ=41	GT:PL:DP:DV:SP:DP4	0/1:85,0,175:11:4:2:5,2,2,2	0/1:165,0,255:27:9:0:15,3,7,2
Locus_2_Transcript_395/4817_Confidence_1.000_Length_1195	429	.	C	G	151	PASS	DP=50;VDB=0.0479773;SGB=-5.3356;RPB=0.627382;MQB=0.984453;MQSB=0.980199;BQB=1;MQ0F=0;ICB=0.5;HOB=0.5;AC=2;AN=4;DP4=17,10,8,3;MQ=41	GT:PL:DP:DV:SP:DP4	0/1:61,0,110:6:2:0:4,0,1,1	0/1:155,0,255:32:9:4:13,10,7,2
Locus_2_Transcript_395/4817_Confidence_1.000_Length_1195	601	.	A	T	212	PASS	DP=41;VDB=0.990559;SGB=-6.56362;RPB=0.936731;MQB=0.972763;MQSB=0.997203;BQB=0.986852;MQ0F=0;ICB=0.5;HOB=0.5;AC=2;AN=4;DP4=11,7,10,5;MQ=41	GT:PL:DP:DV:SP:DP4	0/1:25,0,79:4:1:0:1,2,0,1	0/1:251,0,255:29:14:0:10,5,10,4
Locus_2_Transcript_395/4817_Confidence_1.000_Length_1195	711	.	A	C	209	PASS	DP=45;VDB=0.204649;SGB=-5.9492;RPB=0.616528;MQB=0.998031;MQSB=0.999785;BQB=0.90796;MQ0F=0;ICB=0.5;HOB=0.5;AC=2;AN=4;DP4=7,10,8,5;MQ=41	GT:PL:DP:DV:SP:DP4	0/1:33,0,47:3:1:0:0,2,1,0	0/1:240,0,255:27:12:2:7,8,7,5
Locus_2_Transcript_396/4817_Confidence_1.000_Length_2395	213	.	T	G	67	PASS	DP=44;VDB=0.138089;SGB=-3.79618;RPB=0.987041;MQB=0.889237;MQSB=0.789116;BQB=0.625274;MQ0F=0;ICB=0.5;HOB=0.5;AC=2;AN=4;DP4=15,8,4,2;MQ=39	GT:PL:DP:DV:SP:DP4	0/1:87,0,125:7:3:4:2,2,3,0	0/1:45,0,255:22:3:3:13,6,1,2
Locus_2_Transcript_396/4817_Confidence_1.000_Length_2395	618	.	A	C	160	PASS	DP=39;VDB=0.0147057;SGB=6.07412;RPB=0.238671;MQB=0.918304;MQSB=0.94467;BQB=0.27354;MQ0F=0;ICB=0.3;HOB=0.125;AC=1;AN=4;DP4=7,13,7,4;MQ=41	GT:PL:DP:DV:SP:DP4	0/0:0,3,37:1:0:0:0,1,0,0	0/1:223,0,255:30:11:6:7,12,7,4
Locus_2_Transcript_396/4817_Confidence_1.000_Length_2395	635	.	A	G	192	PASS	DP=39;VDB=0.0190538;SGB=7.4578;RPB=0.156741;MQB=0.938685;MQSB=0.946202;BQB=0.741013;MQ0F=0;ICB=0.3;HOB=0.125;AC=1;AN=4;DP4=7,10,7,6;MQ=41	GT:PL:DP:DV:SP:DP4	0/0:0,3,37:1:0:0:0,1,0,0	0/1:255,0,255:29:13:1:7,9,7,6
Locus_2_Transcript_396/4817_Confidence_1.000_Length_2395	891	.	A	C	61	PASS	DP=26;VDB=0.413752;SGB=3.31571;RPB=0.0600212;MQB=1;MQSB=1;BQB=0.48519;MQ0F=0;ICB=0.3;HOB=0.125;AC=1;AN=4;DP4=3,13,4,3;MQ=42	GT:PL:DP:DV:SP:DP4	0/0:0,6,67:2:0:0:0,2,0,0	0/1:125,0,242:21:7:8:3,11,4,3
Locus_2_Transcript_396/4817_Confidence_1.000_Length_2395	1122	.	G	A	253	PASS	DP=44;VDB=0.0738925;SGB=-6.56403;RPB=0.999785;MQB=0.99914;MQSB=0.997529;BQB=0.646952;MQ0F=0;ICB=0.5;HOB=0.5;AC=2;AN=4;DP4=12,3,10,5;MQ=41	GT:PL:DP:DV:SP:DP4	0/1:61,0,88:5:2:0:3,0,2,0	0/1:255,0,218:25:13:2:9,3,8,5
Locus_2_Transcript_396/4817_Confidence_1.000_Length_2395	1289	.	T	C	182	PASS	DP=48;VDB=0.98103;SGB=-5.33677;RPB=0.455845;MQB=0.999853;MQSB=0.851683;BQB=0.98232;MQ0F=0;ICB=0.5;HOB=0.5;AC=2;AN=4;DP4=17,8,8,3;MQ=40	GT:PL:DP:DV:SP:DP4	0/1:134,0,75:8:5:0:2,1,4,1	0/1:112,0,255:28:6:0:15,7,4,2
Locus_2_Transcript_396/4817_Confidence_1.000_Length_2395	1337	.	T	C	173	PASS	DP=59;VDB=0.454943;SGB=-5.64376;RPB=0.951542;MQB=0.999077;MQSB=0.925036;BQB=0.963629;MQ0F=0;ICB=0.5;HOB=0.5;AC=2;AN=4;DP4=22,7,11,1;MQ=41	GT:PL:DP:DV:SP:DP4	0/1:152,0,176:13:6:0:5,2,5,1	0/1:85,0,255:28:6:3:17,5,6,0
Locus_2_Transcript_396/4817_Confidence_1.000_Length_2395	1430	.	T	C	233	PASS	DP=54;VDB=0.273428;SGB=-6.871;RPB=0.632903;MQB=0.947521;MQSB=0.981425;BQB=0.790743;MQ0F=0;ICB=0.5;HOB=0.5;AC=2;AN=4;DP4=17,6,9,7;MQ=41	GT:PL:DP:DV:SP:DP4	0/1:42,0,199:9:2:4:4,3,0,2	0/1:255,0,254:30:14:4:13,3,9,5
Locus_2_Transcript_396/4817_Confidence_1.000_Length_2395	1471	.	G	A	167	PASS	DP=42;VDB=0.0181341;SGB=6.76576;RPB=0.34461;MQB=0.990763;MQSB=0.909156;BQB=0.505697;MQ0F=0.0238095;ICB=0.3;HOB=0.125;AC=1;AN=4;DP4=13,7,8,4;MQ=40	GT:PL:DP:DV:SP:DP4	0/0:0,12,135:4:0:0:3,1,0,0	0/1:231,0,255:28:12:0:10,6,8,4
Locus_2_Transcript_396/4817_Confidence_1.000_Length_2395	1867	.	C	T	115	PASS	DP=60;VDB=0.910209;SGB=-5.6418;RPB=0.989171;MQB=0.0615776;MQSB=0.894006;BQB=0.993056;MQ0F=0;ICB=0.3;HOB=0.125;AC=1;AN=4;DP4=24,4,8,4;MQ=39	GT:PL:DP:DV:SP:DP4	0/0:2,0,36:2:1:0:1,0,1,0	0/1:177,0,255:38:11:7:23,4,7,4
Locus_2_Transcript_396/4817_Confidence_1.000_Length_2395	1933	.	C	A	102	PASS	DP=49;VDB=0.0475124;SGB=6.76576;RPB=0.0558143;MQB=0.0378066;MQSB=0.984733;BQB=0.960846;MQ0F=0;ICB=0.3;HOB=0.125;AC=1;AN=4;DP4=11,15,9,3;MQ=39	GT:PL:DP:DV:SP:DP4	0/0:0,6,43:2:0:0:0,2,0,0	0/1:166,0,255:36:12:8:11,13,9,3
Locus_2_Transcript_396/4817_Confidence_1.000_Length_2395	1934	.	A	G	90	PASS	DP=46;VDB=0.0684329;SGB=-5.6418;RPB=0.177566;MQB=0.00602938;MQSB=0.923116;BQB=0.570213;MQ0F=0;ICB=0.3;HOB=0.125;AC=1;AN=4;DP4=12,11,8,4;MQ=38	GT:PL:DP:DV:SP:DP4	0/0:2,0,31:2:1:0:0,1,0,1	0/1:151,0,255:33:11:3:12,10,8,3
Locus_2_Transcript_396/4817_Confidence_1.000_Length_2395	1943	.	T	C	110	PASS	DP=50;VDB=0.223892;SGB=7.4578;RPB=0.999882;MQB=0.0582393;MQSB=0.641602;BQB=0.892501;MQ0F=0;ICB=0.3;HOB=0.125;AC=1;AN=4;DP4=16,9,10,3;MQ=39	GT:PL:DP:DV:SP:DP4	0/0:0,3,8:1:0:0:0,1,0,0	0/1:174,0,255:37:13:1:16,8,10,3
Locus_2_Transcript_396/4817_Confidence_1.000_Length_2395	2163	.	C	T	179	PASS	DP=34;VDB=0.790974;SGB=-5.6418;RPB=0.817367;MQB=0.582748;MQSB=0.997985;BQB=0.0368678;MQ0F=0;ICB=0.3;HOB=0.125;AC=3;AN=4;DP4=11,1,6,6;MQ=41	GT:PL:DP:DV:SP:DP4	1/1:37,3,0:1:1:0:0,0,0,1	0/1:205,0,206:23:11:12:11,1,6,5
Locus_2_Transcript_396/4817_Confidence_1.000_Length_2395	2210	.	T	C	230	PASS	DP=26;VDB=0.737558;SGB=-5.95036;RPB=0.808631;MQB=0.989565;MQSB=0.997478;BQB=0.895122;MQ0F=0;ICB=0.3;HOB=0.125;AC=3;AN=4;DP4=4,4,8,5;MQ=41	GT:PL:DP:DV:SP:DP4	1/1:92,9,0:3:3:0:0,0,3,0	0/1:202,0,190:18:10:0:4,4,5,5
Locus_2_Transcript_396/4817_Confidence_1.000_Length_2395	2262	.	T	C	225	PASS	DP=39;VDB=0.288478;SGB=-5.64373;RPB=0.771623;MQB=0.771623;MQSB=0.800737;BQB=0.967472;MQ0F=0;ICB=0.3;HOB=0.125;AC=3;AN=4;DP4=6,8,7,5;MQ=41	GT:PL:DP:DV:SP:DP4	1/1:147,15,0:5:5:0:0,0,5,0	0/1:142,0,255:21:7:2:6,8,2,5
Locus_2_Transcript_397/4817_Confidence_1.000_Length_437	183	.	A	G	124	PASS	DP=77;VDB=0.0292687;SGB=-6.56424;RPB=0.775923;MQB=0.825238;MQSB=0.87037;BQB=0.567851;MQ0F=0;ICB=0.5;HOB=0.5;AC=2;AN=4;DP4=39,2,15,0;MQ=41	GT:PL:DP:DV:SP:DP4	0/1:40,0,173:21:3:0:18,0,3,0	0/1:150,0,236:35:12:3:21,2,12,0
Locus_2_Transcript_397/4817_Confidence_1.000_Length_437	259	.	T	G	425	PASS	DP=176;VDB=0.0055812;SGB=-20.066;RPB=0.0850698;MQB=0.0364654;MQSB=0.117259;BQB=0.197782;MQ0F=0;ICB=0.5;HOB=0.5;AC=2;AN=4;DP4=47,10,46,13;MQ=40	GT:PL:DP:DV:SP:DP4	0/1:233,0,231:45:19:8:25,1,15,4	0/1:255,0,255:71:40:2:22,9,31,9
Locus_2_Transcript_397/4817_Confidence_1.000_Length_437	271	.	C	A	442	PASS	DP=175;VDB=0.00264769;SGB=-1.38526;RPB=0.823603;MQB=0.995417;MQSB=0.0901377;BQB=0.933353;MQ0F=0;ICB=0.5;HOB=0.5;AC=2;AN=4;DP4=15,4,70,20;MQ=39	GT:PL:DP:DV:SP:DP4	0/1:255,0,107:43:34:0:8,1,28,6	0/1:255,0,110:66:56:1:7,3,42,14
Locus_2_Transcript_397/4817_Confidence_1.000_Length_437	307	.	C	A	127	PASS	DP=169;VDB=0.0926217;SGB=-8.40556;RPB=0.34578;MQB=0.140021;MQSB=0.159121;BQB=0.869302;MQ0F=0;ICB=0.5;HOB=0.5;AC=2;AN=4;DP4=59,32,15,6;MQ=39	GT:PL:DP:DV:SP:DP4	0/1:8,0,255:47:6:8:26,15,6,0	0/1:186,0,255:65:15:1:33,17,9,6
Locus_2_Transcript_397/4817_Confidence_1.000_Length_437	327	.	G	A	258	PASS	DP=157;VDB=0.0803234;SGB=-9.32613;RPB=0.289847;MQB=0.0482553;MQSB=0.581395;BQB=0.195603;MQ0F=0.0127389;ICB=0.5;HOB=0.5;AC=2;AN=4;DP4=51,21,13,11;MQ=38	GT:PL:DP:DV:SP:DP4	0/1:177,0,255:39:12:8:20,7,6,6	0/1:147,0,255:57:12:3:31,14,7,5
Locus_2_Transcript_397/4817_Confidence_1.000_Length_437	335	.	T	G	173	PASS	DP=127;VDB=0.700785;SGB=-7.17815;RPB=0.999954;MQB=0.572754;MQSB=0.998704;BQB=0.869945;MQ0F=0.015748;ICB=0.5;HOB=0.5;AC=2;AN=4;DP4=24,55,7,10;MQ=38	GT:PL:DP:DV:SP:DP4	0/1:179,0,255:39:10:0:10,19,4,6	0/1:61,0,255:57:7:4:14,36,3,4
Locus_2_Transcript_397/4817_Confidence_1.000_Length_437	366	.	T	C	165	PASS	DP=83;VDB=0.0117578;SGB=-6.87126;RPB=0.933111;MQB=0.859442;MQSB=0.264424;BQB=0.522407;MQ0F=0.0240964;ICB=0.5;HOB=0.5;AC=2;AN=4;DP4=16,32,3,13;MQ=38	GT:PL:DP:DV:SP:DP4	0/1:72,0,255:26:5:0:7,14,1,4	0/1:159,0,255:38:11:3:9,18,2,9
Locus_2_Transcript_398/4817_Confidence_1.000_Length_318	147	.	T	A	124	PASS	DP=80;VDB=0.554126;SGB=-5.64284;RPB=0.913626;MQB=0.996393;MQSB=0.177332;BQB=0.203214;MQ0F=0;ICB=0.5;HOB=0.5;AC=2;AN=4;DP4=30,11,7,5;MQ=39	GT:PL:DP:DV:SP:DP4	0/1:39,0,201:13:2:0:10,1,2,0	0/1:152,0,255:40:10:3:20,10,5,5
Locus_2_Transcript_398/4817_Confidence_1.000_Length_318	208	.	C	T	419	PASS	DP=67;VDB=0.608387;SGB=-0.68217;RPB=0.213156;MQB=0.997716;MQSB=0.746168;BQB=0.842191;MQ0F=0.0447761;ICB=0.3;HOB=0.125;AC=3;AN=4;DP4=3,1,27,9;MQ=37	GT:PL:DP:DV:SP:DP4	1/1:231,27,0:9:9:0:0,0,6,3	0/1:255,0,54:31:27:0:3,1,21,6
Locus_2_Transcript_399/4817_Confidence_1.000_Length_617	58	.	C	A	63	PASS	DP=60;VDB=0.00318484;SGB=-5.95036;RPB=0.995955;MQB=0.422931;BQB=0.997027;MQ0F=0;ICB=0.5;HOB=0.5;AC=2;AN=4;DP4=31,0,13,0;MQ=40	GT:PL:DP:DV:SP:DP4	0/1:13,0,160:13:3:0:10,0,3,0	0/1:117,0,170:31:10:0:21,0,10,0
Locus_2_Transcript_399/4817_Confidence_1.000_Length_617	80	.	G	A	97	PASS	DP=78;VDB=0.00877269;SGB=-5.95067;RPB=0.0686373;MQB=0.16385;BQB=0.962062;MQ0F=0;ICB=0.5;HOB=0.5;AC=2;AN=4;DP4=47,0,13,0;MQ=40	GT:PL:DP:DV:SP:DP4	0/1:106,0,172:20:6:0:14,0,6,0	0/1:57,0,166:40:7:0:33,0,7,0
Locus_2_Transcript_399/4817_Confidence_1.000_Length_617	245	.	T	C	206	PASS	DP=111;VDB=0.22406;SGB=-9.93983;RPB=0.972748;MQB=0.997175;MQSB=0.566948;BQB=0.487401;MQ0F=0;ICB=0.5;HOB=0.5;AC=2;AN=4;DP4=44,16,26,0;MQ=41	GT:PL:DP:DV:SP:DP4	0/1:165,0,169:17:10:8:5,2,10,0	0/1:105,0,255:69:16:15:39,14,16,0
Locus_2_Transcript_399/4817_Confidence_1.000_Length_617	360	.	G	A	348	PASS	DP=86;VDB=0.0876187;SGB=-10.5535;RPB=0.94862;MQB=0.998879;MQSB=0.999797;BQB=0.103143;MQ0F=0;ICB=0.5;HOB=0.5;AC=2;AN=4;DP4=23,13,8,20;MQ=41	GT:PL:DP:DV:SP:DP4	0/1:156,0,85:10:7:7:2,1,1,6	0/1:255,0,255:54:21:13:21,12,7,14
Locus_2_Transcript_400/4817_Confidence_1.000_Length_366	236	.	T	C	217	PASS	DP=68;VDB=0.949135;SGB=-8.09867;RPB=0.697469;MQB=0.210533;MQSB=0.687693;BQB=0.725773;MQ0F=0;ICB=0.5;HOB=0.5;AC=2;AN=4;DP4=12,19,10,10;MQ=35	GT:PL:DP:DV:SP:DP4	0/1:55,0,170:9:3:0:3,3,2,1	0/1:227,0,255:42:17:3:9,16,8,9
Locus_2_Transcript_400/4817_Confidence_1.000_Length_366	269	.	A	C	159	PASS	DP=51;VDB=0.0271496;SGB=-5.9492;RPB=0.999458;MQB=0.66355;MQSB=0.125455;BQB=0.995131;MQ0F=0;ICB=0.5;HOB=0.5;AC=2;AN=4;DP4=10,13,5,8;MQ=35	GT:PL:DP:DV:SP:DP4	0/1:13,0,168:8:1:0:3,4,0,1	0/1:211,0,244:28:12:0:7,9,5,7
Locus_2_Transcript_401/4817_Confidence_1.000_Length_386	285	.	C	T	76	PASS	DP=36;VDB=0.0390351;SGB=-4.10417;RPB=0.708654;MQB=0.1453;MQSB=0.589135;BQB=0.460763;MQ0F=0;ICB=0.5;HOB=0.5;AC=2;AN=4;DP4=5,15,4,3;MQ=39	GT:PL:DP:DV:SP:DP4	0/1:58,0,117:6:2:4:1,3,2,0	0/1:83,0,255:21:5:2:4,12,2,3
Locus_2_Transcript_401/4817_Confidence_1.000_Length_386	295	.	T	C	76	PASS	DP=35;VDB=0.037241;SGB=-4.10417;RPB=0.802191;MQB=0.1453;MQSB=0.489829;BQB=0.240785;MQ0F=0;ICB=0.5;HOB=0.5;AC=2;AN=4;DP4=4,16,4,3;MQ=39	GT:PL:DP:DV:SP:DP4	0/1:58,0,116:6:2:4:1,3,2,0	0/1:83,0,233:21:5:3:3,13,2,3
Locus_2_Transcript_404/4817_Confidence_1.000_Length_579	283	.	T	C	219	PASS	DP=61;VDB=0.33566;SGB=-7.1781;RPB=0.991826;MQB=0.967701;MQSB=0.484197;BQB=0.14276;MQ0F=0.147541;ICB=0.5;HOB=0.5;AC=2;AN=4;DP4=20,5,6,11;MQ=29	GT:PL:DP:DV:SP:DP4	0/1:106,0,18:5:4:0:1,0,2,2	0/1:177,0,222:37:13:22:19,5,4,9
Locus_2_Transcript_404/4817_Confidence_1.000_Length_579	350	.	T	A	113	PASS	DP=45;VDB=0.543076;SGB=-5.02958;RPB=0.918888;MQB=0.963102;MQSB=0.555306;BQB=0.284079;MQ0F=0.0666667;ICB=0.5;HOB=0.5;AC=2;AN=4;DP4=15,8,3,7;MQ=32	GT:PL:DP:DV:SP:DP4	0/1:79,0,84:7:4:8:2,1,0,4	0/1:98,0,252:26:6:2:13,7,3,3
Locus_2_Transcript_404/4817_Confidence_1.000_Length_579	388	.	C	T	68	PASS	DP=36;VDB=0.0036287;SGB=-4.41469;RPB=0.0303017;MQB=0.36284;MQSB=0.896555;BQB=0.747554;MQ0F=0;ICB=0.5;HOB=0.5;AC=2;AN=4;DP4=13,7,6,2;MQ=37	GT:PL:DP:DV:SP:DP4	0/1:88,0,81:7:4:0:2,1,2,2	0/1:44,0,255:21:4:6:11,6,4,0
Locus_2_Transcript_404/4817_Confidence_1.000_Length_579	389	.	G	A	100	PASS	DP=36;VDB=0.99507;SGB=-4.72062;RPB=0.896555;MQB=0.631238;MQSB=0.896555;BQB=0.775392;MQ0F=0;ICB=0.5;HOB=0.5;AC=2;AN=4;DP4=13,6,6,3;MQ=37	GT:PL:DP:DV:SP:DP4	0/1:48,0,111:7:2:4:2,3,2,0	0/1:117,0,238:21:7:5:11,3,4,3
Locus_2_Transcript_404/4817_Confidence_1.000_Length_579	478	.	T	A	215	PASS	DP=28;VDB=0.0771861;SGB=-5.3356;RPB=0.918304;MQB=0.292093;MQSB=0.88692;BQB=0.803979;MQ0F=0;ICB=0.5;HOB=0.5;AC=2;AN=4;DP4=5,3,4,7;MQ=38	GT:PL:DP:DV:SP:DP4	0/1:53,0,90:5:2:10:3,0,0,2	0/1:225,0,90:14:9:0:2,3,4,5
Locus_2_Transcript_404/4817_Confidence_1.000_Length_579	501	.	G	A	178	PASS	DP=22;VDB=0.474122;SGB=-5.02916;RPB=0.809155;MQB=0.266194;MQSB=0.994135;BQB=0.555306;MQ0F=0;ICB=0.5;HOB=0.5;AC=2;AN=4;DP4=1,5,5,5;MQ=38	GT:PL:DP:DV:SP:DP4	0/1:90,0,34:5:3:10:0,2,3,0	0/1:152,0,102:11:7:0:1,3,2,5
Locus_2_Transcript_406/4817_Confidence_1.000_Length_772	195	.	G	A	71	PASS	DP=61;VDB=0.758511;SGB=-7.48501;RPB=0.770315;MQB=0.0239394;MQSB=0.970766;BQB=0.959107;MQ0F=0.0327869;ICB=0.5;HOB=0.5;AC=2;AN=4;DP4=14,9,12,6;MQ=23	GT:PL:DP:DV:SP:DP4	0/1:68,0,97:16:9:3:5,2,8,1	0/1:67,0,223:25:9:2:9,7,4,5
Locus_2_Transcript_406/4817_Confidence_1.000_Length_772	275	.	C	T	89	PASS	DP=56;VDB=0.283458;SGB=-7.79186;RPB=0.712279;MQB=0.131048;MQSB=0.983772;BQB=0.97197;MQ0F=0.142857;ICB=0.5;HOB=0.5;AC=2;AN=4;DP4=14,14,10,9;MQ=22	GT:PL:DP:DV:SP:DP4	0/1:127,0,130:20:10:0:5,5,5,5	0/1:26,0,223:27:9:0:9,9,5,4
Locus_2_Transcript_406/4817_Confidence_1.000_Length_772	333	.	C	T	70	PASS	DP=45;VDB=0.902698;SGB=-6.25755;RPB=0.997554;MQB=0.0241156;MQSB=0.32105;BQB=0.713115;MQ0F=0.133333;ICB=0.5;HOB=0.5;AC=2;AN=4;DP4=19,1,10,4;MQ=25	GT:PL:DP:DV:SP:DP4	0/1:75,0,102:12:6:0:5,1,4,2	0/1:59,0,135:22:8:9:14,0,6,2
Locus_2_Transcript_406/4817_Confidence_1.000_Length_772	393	.	C	G	63	PASS	DP=39;VDB=0.705725;SGB=-5.02958;RPB=0.363347;MQB=0.284499;MQSB=0.243669;BQB=0.547453;MQ0F=0;ICB=0.5;HOB=0.5;AC=2;AN=4;DP4=15,7,2,8;MQ=30	GT:PL:DP:DV:SP:DP4	0/1:97,0,150:14:6:16:7,1,1,5	0/1:31,0,223:18:4:2:8,6,1,3
Locus_2_Transcript_406/4817_Confidence_1.000_Length_772	567	.	C	A	255	PASS	DP=59;VDB=0.178542;SGB=-8.09867;RPB=0.968785;MQB=0.319292;MQSB=0.668854;BQB=0.184527;MQ0F=0;ICB=0.5;HOB=0.5;AC=2;AN=4;DP4=13,9,12,8;MQ=39	GT:PL:DP:DV:SP:DP4	0/1:64,0,212:14:3:0:7,4,2,1	0/1:255,0,228:28:17:0:6,5,10,7
Locus_2_Transcript_406/4817_Confidence_1.000_Length_772	740	.	C	A	147	PASS	DP=16;VDB=0.000741206;SGB=-1.13755;RPB=0.962269;MQB=0.995736;MQSB=0.125315;BQB=0.540433;MQ0F=0;ICB=0.3;HOB=0.125;AC=3;AN=4;DP4=2,1,2,7;MQ=37	GT:PL:DP:DV:SP:DP4	1/1:113,12,0:4:4:0:0,0,0,4	0/1:98,0,89:8:5:0:2,1,2,3
Locus_2_Transcript_406/4817_Confidence_1.000_Length_772	757	.	A	G	61	PASS	DP=10;VDB=0.00595258;SGB=-0.956117;RPB=0.577865;MQB=0.924584;MQSB=1;BQB=0.809011;MQ0F=0;ICB=0.3;HOB=0.125;AC=3;AN=4;DP4=0,3,1,5;MQ=35	GT:PL:DP:DV:SP:DP4	1/1:113,12,0:4:4:0:0,0,0,4	0/1:13,0,79:5:2:0:0,3,1,1
Locus_2_Transcript_407/4817_Confidence_1.000_Length_287	132	.	T	C	153	PASS	DP=53;VDB=0.439026;SGB=-5.3363;RPB=0.99095;MQB=0.987702;MQSB=0.0562717;BQB=0.99899;MQ0F=0.0188679;ICB=0.5;HOB=0.5;AC=2;AN=4;DP4=16,2,10,1;MQ=34	GT:PL:DP:DV:SP:DP4	0/1:92,0,28:5:3:0:2,0,3,0	0/1:124,0,203:24:8:0:14,2,7,1
Locus_2_Transcript_407/4817_Confidence_1.000_Length_287	154	.	C	A	62	PASS	DP=43;VDB=0.021643;SGB=-5.02916;RPB=0.317805;MQB=0.00886838;MQSB=0.98829;BQB=0.870045;MQ0F=0.0232558;ICB=0.5;HOB=0.5;AC=2;AN=4;DP4=10,9,6,4;MQ=33	GT:PL:DP:DV:SP:DP4	0/1:63,0,63:5:3:0:2,0,3,0	0/1:63,0,255:24:7:0:8,9,3,4
Locus_2_Transcript_408/4817_Confidence_1.000_Length_361	26	.	G	C	123	PASS	DP=11;VDB=1.07499e-05;SGB=-0.827256;RPB=0;MQB=0.777778;BQB=0.888889;MQ0F=0;ICB=0.3;HOB=0.125;AC=3;AN=4;DP4=2,0,9,0;MQ=38	GT:PL:DP:DV:SP:DP4	1/1:64,6,0:2:2:0:0,0,2,0	0/1:124,0,42:9:7:0:2,0,7,0
Locus_2_Transcript_408/4817_Confidence_1.000_Length_361	84	.	G	A	93	PASS	DP=37;VDB=0.00599249;SGB=9.76429;RPB=0.00738068;MQB=0.726149;BQB=0.646905;MQ0F=0.0540541;ICB=0.3;HOB=0.125;AC=1;AN=4;DP4=6,0,18,0;MQ=34	GT:PL:DP:DV:SP:DP4	0/0:0,6,77:2:0:0:2,0,0,0	0/1:157,0,65:22:18:0:4,0,18,0
Locus_2_Transcript_408/4817_Confidence_1.000_Length_361	120	.	G	C	136	PASS	DP=58;VDB=0.903477;SGB=-5.64361;RPB=0.427742;MQB=0.867183;BQB=0.968935;MQ0F=0.0344828;ICB=0.3;HOB=0.125;AC=3;AN=4;DP4=26,0,12,0;MQ=33	GT:PL:DP:DV:SP:DP4	1/1:105,12,0:4:4:0:0,0,4,0	0/1:95,0,172:34:8:0:26,0,8,0
Locus_2_Transcript_408/4817_Confidence_1.000_Length_361	170	.	G	A	74	PASS	DP=59;VDB=0.935112;SGB=-4.72235;RPB=0.973274;MQB=0.99325;MQSB=0.325013;BQB=0.499431;MQ0F=0.0508475;ICB=0.5;HOB=0.5;AC=2;AN=4;DP4=27,8,3,6;MQ=31	GT:PL:DP:DV:SP:DP4	0/1:105,0,21:7:4:4:3,0,2,2	0/1:32,0,255:37:5:15:24,8,1,4
Locus_2_Transcript_408/4817_Confidence_1.000_Length_361	282	.	T	C	222	PASS	DP=46;VDB=0.0526352;SGB=-7.79186;RPB=0.828248;MQB=0.0101119;MQSB=0.840851;BQB=0.481716;MQ0F=0.0217391;ICB=0.3;HOB=0.125;AC=3;AN=4;DP4=4,9,10,9;MQ=30	GT:PL:DP:DV:SP:DP4	1/1:163,24,0:8:8:0:0,0,5,3	0/1:123,0,249:24:11:2:4,9,5,6
Locus_2_Transcript_409/4817_Confidence_1.000_Length_319	184	.	C	T	78	PASS	DP=58;VDB=0.0898339;SGB=-5.95055;RPB=0.632692;MQB=8.72868e-05;MQSB=0.351728;BQB=0.696494;MQ0F=0;ICB=0.5;HOB=0.5;AC=2;AN=4;DP4=18,3,10,3;MQ=34	GT:PL:DP:DV:SP:DP4	1/1:147,27,0:9:9:0:0,0,8,1	0/0:0,18,255:25:4:8:18,3,2,2
Locus_2_Transcript_409/4817_Confidence_1.000_Length_319	188	.	C	T	78	PASS	DP=58;VDB=0.348694;SGB=-5.95055;RPB=0.931916;MQB=1.18822e-05;MQSB=0.309248;BQB=0.664157;MQ0F=0;ICB=0.5;HOB=0.5;AC=2;AN=4;DP4=18,4,9,4;MQ=33	GT:PL:DP:DV:SP:DP4	1/1:147,27,0:9:9:0:0,0,8,1	0/0:0,15,255:26:4:13:18,4,1,3
Locus_2_Transcript_410/4817_Confidence_1.000_Length_429	356	.	C	T	97	PASS	DP=31;VDB=0.0494711;SGB=-0.2799;RPB=0.444444;MQB=0.583333;MQSB=0.297351;BQB=0.833333;MQ0F=0.0322581;AC=4;AN=4;DP4=1,1,8,10;MQ=14	GT:PL:DP:DV:SP:DP4	1/1:34,9,0:3:3:0:0,0,2,1	1/1:118,26,0:17:15:0:1,1,6,9
Locus_2_Transcript_412/4817_Confidence_1.000_Length_372	94	.	G	A	69	PASS	DP=20;VDB=0.236588;SGB=2.63044;RPB=0.961166;MQB=0.899815;BQB=0.961166;MQ0F=0;ICB=1;HOB=0.5;AC=1;AN=2;DP4=7,0,6,0;MQ=41	GT:PL:DP:DV:SP:DP4	./.:0,0,0:0:0:0:0,0,0,0	0/1:129,0,145:13:6:0:7,0,6,0
Locus_2_Transcript_418/4817_Confidence_1.000_Length_930	253	.	A	T	79	PASS	DP=28;VDB=0.226058;SGB=2.63044;RPB=0.781802;MQB=1;MQSB=0.785785;BQB=0.307929;MQ0F=0;ICB=0.3;HOB=0.125;AC=1;AN=4;DP4=11,2,3,3;MQ=40	GT:PL:DP:DV:SP:DP4	0/0:0,3,42:1:0:0:1,0,0,0	0/1:143,0,228:18:6:6:10,2,3,3
Locus_2_Transcript_418/4817_Confidence_1.000_Length_930	369	.	C	G	72	PASS	DP=27;VDB=0.144519;SGB=-5.02822;RPB=0.179964;MQB=0.943785;MQSB=0.925758;BQB=0.955315;MQ0F=0.185185;ICB=0.3;HOB=0.125;AC=1;AN=4;DP4=6,4,9,1;MQ=34	GT:PL:DP:DV:SP:DP4	0/0:0,3,73:5:2:0:3,0,1,1	0/1:135,0,175:15:8:16:3,4,8,0
Locus_2_Transcript_418/4817_Confidence_1.000_Length_930	469	.	T	A	131	PASS	DP=27;VDB=0.328773;SGB=-5.64284;RPB=0.977926;MQB=0.0608101;MQSB=0.597928;BQB=0.977926;MQ0F=0;ICB=0.5;HOB=0.5;AC=2;AN=4;DP4=5,2,7,5;MQ=38	GT:PL:DP:DV:SP:DP4	0/1:29,0,29:3:2:0:1,0,2,0	0/1:165,0,155:16:10:2:4,2,5,5
Locus_2_Transcript_418/4817_Confidence_1.000_Length_930	476	.	T	C	243	PASS	DP=29;VDB=0.91702;SGB=-0.626688;RPB=1;MQB=0.24641;MQSB=0.249764;BQB=0.782349;MQ0F=0.0344828;ICB=0.3;HOB=0.125;AC=3;AN=4;DP4=4,2,9,6;MQ=37	GT:PL:DP:DV:SP:DP4	1/1:83,9,0:3:3:0:0,0,3,0	0/1:224,0,147:18:12:2:4,2,6,6
Locus_2_Transcript_418/4817_Confidence_1.000_Length_930	531	.	G	T	73	PASS	DP=29;VDB=0.191244;SGB=0.232131;RPB=0.764228;MQB=0.00153381;MQSB=0.0150586;BQB=0.99115;MQ0F=0.137931;ICB=0.5;HOB=0.5;AC=2;AN=4;DP4=1,5,12,6;MQ=26	GT:PL:DP:DV:SP:DP4	0/1:32,0,56:4:2:5:0,2,2,0	0/1:104,0,86:20:16:5:1,3,10,6
Locus_2_Transcript_418/4817_Confidence_1.000_Length_930	668	.	C	G	61	PASS	DP=40;VDB=0.568441;SGB=0.523292;RPB=0.186744;MQB=0.314582;MQSB=0.988436;BQB=0.0933903;MQ0F=0.45;AC=4;AN=4;DP4=3,0,23,4;MQ=13	GT:PL:DP:DV:SP:DP4	1/1:60,12,0:4:4:0:0,0,4,0	1/1:57,0,1:26:23:0:3,0,19,4
Locus_2_Transcript_419/4817_Confidence_1.000_Length_273	70	.	G	C	159	PASS	DP=19;VDB=0.0242208;SGB=-0.949327;RPB=1;MQB=1;BQB=1;MQ0F=0;AC=4;AN=4;DP4=1,0,11,0;MQ=31	GT:PL:DP:DV:SP:DP4	1/1:92,9,0:3:3:0:0,0,3,0	1/1:122,3,0:9:8:0:1,0,8,0
Locus_2_Transcript_419/4817_Confidence_1.000_Length_273	204	.	C	T	180	PASS	DP=33;VDB=0.0146326;SGB=-5.95036;RPB=0.933111;MQB=0.0461009;MQSB=0.992337;BQB=0.976718;MQ0F=0;ICB=0.3;HOB=0.125;AC=3;AN=4;DP4=4,6,6,7;MQ=35	GT:PL:DP:DV:SP:DP4	1/1:83,9,0:3:3:0:0,0,0,3	0/1:161,0,222:20:10:2:4,6,6,4
Locus_2_Transcript_425/4817_Confidence_1.000_Length_898	620	.	T	G	160	PASS	DP=30;VDB=0.947131;SGB=-4.72185;RPB=0.543691;MQB=0.310905;MQSB=0.962269;BQB=0.594978;MQ0F=0;ICB=0.5;HOB=0.5;AC=2;AN=4;DP4=6,10,4,5;MQ=37	GT:PL:DP:DV:SP:DP4	0/1:85,0,85:7:3:0:1,3,1,2	0/1:139,0,243:18:6:0:5,7,3,3
Locus_2_Transcript_426/4817_Confidence_1.000_Length_620	410	.	T	G	108	PASS	DP=55;VDB=0.391945;SGB=4.69269;RPB=0.824765;MQB=0.00393257;MQSB=0.906646;BQB=0.425373;MQ0F=0.272727;ICB=0.3;HOB=0.125;AC=1;AN=4;DP4=24,15,5,4;MQ=22	GT:PL:DP:DV:SP:DP4	0/0:0,39,163:13:0:0:5,8,0,0	0/1:172,0,169:35:9:4:19,7,5,4
Locus_2_Transcript_430/4817_Confidence_1.000_Length_793	224	.	C	T	101	PASS	DP=28;VDB=0.018693;SGB=5.38303;RPB=0.448955;MQB=0.184981;MQSB=0.998751;BQB=0.403532;MQ0F=0.0714286;ICB=0.3;HOB=0.125;AC=1;AN=4;DP4=7,2,8,2;MQ=37	GT:PL:DP:DV:SP:DP4	0/0:0,6,77:2:0:0:2,0,0,0	0/1:164,0,142:17:10:0:5,2,8,2
Locus_2_Transcript_430/4817_Confidence_1.000_Length_793	339	.	C	T	213	PASS	DP=52;VDB=0.988191;SGB=-5.95055;RPB=0.791416;MQB=0.0125627;MQSB=0.312816;BQB=0.547522;MQ0F=0.0769231;ICB=0.5;HOB=0.5;AC=2;AN=4;DP4=22,2,9,4;MQ=31	GT:PL:DP:DV:SP:DP4	0/1:106,0,53:7:4:0:3,0,3,1	0/1:170,0,184:30:9:8:19,2,6,3
Locus_2_Transcript_430/4817_Confidence_1.000_Length_793	451	.	C	A	176	PASS	DP=55;VDB=0.000469097;SGB=-5.3363;RPB=0.992238;MQB=0.441018;MQSB=0.98255;BQB=0.0516644;MQ0F=0.0545455;ICB=0.5;HOB=0.5;AC=2;AN=4;DP4=16,12,8,3;MQ=35	GT:PL:DP:DV:SP:DP4	0/1:56,0,244:18:3:3:10,5,3,0	0/1:184,0,204:21:8:2:6,7,5,3
Locus_2_Transcript_430/4817_Confidence_1.000_Length_793	486	.	C	T	216	PASS	DP=51;VDB=0.941142;SGB=-6.56443;RPB=0.540235;MQB=0.330199;MQSB=0.758043;BQB=0.990884;MQ0F=0.0196078;ICB=0.5;HOB=0.5;AC=2;AN=4;DP4=18,8,8,7;MQ=39	GT:PL:DP:DV:SP:DP4	0/1:121,0,226:19:7:2:9,3,4,3	0/1:159,0,254:22:8:2:9,5,4,4
Locus_2_Transcript_430/4817_Confidence_1.000_Length_793	578	.	T	A	275	PASS	DP=56;VDB=0.130391;SGB=-7.17815;RPB=0.603067;MQB=0.874406;MQSB=0.824135;BQB=0.102741;MQ0F=0.0178571;ICB=0.3;HOB=0.125;AC=3;AN=4;DP4=16,4,16,1;MQ=39	GT:PL:DP:DV:SP:DP4	1/1:167,15,0:8:7:0:0,1,7,0	0/1:172,0,255:29:10:0:16,3,9,1
Locus_2_Transcript_435/4817_Confidence_1.000_Length_232	139	.	G	A	62	PASS	DP=31;VDB=0.110461;SGB=-1.32409;MQSB=0.85394;MQ0F=0.387097;AC=4;AN=4;DP4=0,0,12,6;MQ=7	GT:PL:DP:DV:SP:DP4	1/1:45,27,0:9:9:0:0,0,6,3	1/1:71,27,0:9:9:0:0,0,6,3
Locus_2_Transcript_436/4817_Confidence_1.000_Length_524	243	.	G	A	109	PASS	DP=30;VDB=0.0966519;SGB=-4.72185;RPB=0.970446;MQB=0.381619;MQSB=0.827735;BQB=0.999167;MQ0F=0.1;ICB=0.5;HOB=0.5;AC=2;AN=4;DP4=9,1,7,2;MQ=34	GT:PL:DP:DV:SP:DP4	0/1:88,0,93:6:3:0:2,1,3,0	0/1:85,0,140:13:6:7:7,0,4,2
Locus_2_Transcript_436/4817_Confidence_1.000_Length_524	322	.	A	G	74	PASS	DP=33;VDB=0.666245;SGB=-4.41425;RPB=0.509156;MQB=0.567118;MQSB=0.875173;BQB=0.902954;MQ0F=0;ICB=0.5;HOB=0.5;AC=2;AN=4;DP4=11,4,4,4;MQ=35	GT:PL:DP:DV:SP:DP4	0/1:130,0,71:8:5:8:3,0,1,4	0/1:7,0,244:15:3:3:8,4,3,0
Locus_2_Transcript_437/4817_Confidence_1.000_Length_401	85	.	G	C	65	PASS	DP=48;VDB=0.0117442;SGB=-1.36128;RPB=0.951817;MQB=0.00012341;BQB=0.980895;MQ0F=0.0625;ICB=0.3;HOB=0.125;AC=3;AN=4;DP4=8,0,27,0;MQ=19	GT:PL:DP:DV:SP:DP4	1/1:71,30,0:12:12:0:0,0,12,0	0/1:58,0,129:23:15:0:8,0,15,0
Locus_2_Transcript_437/4817_Confidence_1.000_Length_401	137	.	C	A	109	PASS	DP=90;VDB=0.00174234;SGB=-1.30572;RPB=0.356975;MQB=7.30521e-06;MQSB=0.0917708;BQB=0.680266;MQ0F=0.0111111;ICB=0.3;HOB=0.125;AC=3;AN=4;DP4=9,1,37,4;MQ=21	GT:PL:DP:DV:SP:DP4	1/1:86,3,0:15:14:0:1,0,12,2	0/1:86,0,143:36:27:0:8,1,25,2
Locus_2_Transcript_437/4817_Confidence_1.000_Length_401	138	.	C	T	109	PASS	DP=92;VDB=0.00183802;SGB=-1.30572;RPB=0.394371;MQB=7.30521e-06;MQSB=0.0917708;BQB=0.802007;MQ0F=0.0326087;ICB=0.3;HOB=0.125;AC=3;AN=4;DP4=9,1,37,4;MQ=21	GT:PL:DP:DV:SP:DP4	1/1:86,3,0:15:14:0:1,0,12,2	0/1:86,0,142:36:27:0:8,1,25,2
Locus_2_Transcript_437/4817_Confidence_1.000_Length_401	180	.	G	A	210	PASS	DP=91;VDB=1.00081e-05;SGB=-1.18714;RPB=0.00647814;MQB=1.08107e-05;MQSB=0.485646;BQB=0.183968;MQ0F=0.0549451;ICB=0.5;HOB=0.5;AC=2;AN=4;DP4=7,4,31,15;MQ=22	GT:PL:DP:DV:SP:DP4	0/1:112,0,90:19:14:10:5,0,7,7	0/1:162,0,85:38:32:12:2,4,24,8
Locus_2_Transcript_437/4817_Confidence_1.000_Length_401	188	.	G	A	176	PASS	DP=90;VDB=3.03648e-07;SGB=-1.20102;RPB=0.00699326;MQB=1.90487e-07;MQSB=0.643304;BQB=0.952431;MQ0F=0.0555556;ICB=0.5;HOB=0.5;AC=2;AN=4;DP4=9,5,26,16;MQ=22	GT:PL:DP:DV:SP:DP4	0/1:109,0,99:18:13:14:5,0,5,8	0/1:130,0,162:38:29:6:4,5,21,8
Locus_2_Transcript_437/4817_Confidence_1.000_Length_401	299	.	G	A	63	PASS	DP=23;VDB=0.0263438;SGB=1.94933;RPB=0.0657285;MQB=0.606531;MQSB=0.249352;BQB=0.135335;MQ0F=0;ICB=0.3;HOB=0.125;AC=1;AN=4;DP4=8,1,1,4;MQ=33	GT:PL:DP:DV:SP:DP4	0/1:127,0,108:10:5:13:5,0,1,4	0/0:0,12,69:4:0:0:3,1,0,0
Locus_2_Transcript_440/4817_Confidence_1.000_Length_219	172	.	C	T	136	PASS	DP=35;VDB=0.000539526;SGB=-6.25755;RPB=1;MQB=0.998678;MQSB=0.994207;BQB=0.979058;MQ0F=0;ICB=0.5;HOB=0.5;AC=2;AN=4;DP4=5,7,4,10;MQ=24	GT:PL:DP:DV:SP:DP4	0/1:121,0,23:8:6:0:1,1,2,4	0/1:79,0,124:18:8:2:4,6,2,6
Locus_2_Transcript_459/4817_Confidence_1.000_Length_247	160	.	C	T	82	PASS	DP=46;VDB=0.00145813;SGB=-8.40556;RPB=0.969497;MQB=0.164236;MQSB=0.683145;BQB=0.295557;MQ0F=0.130435;ICB=0.3;HOB=0.125;AC=3;AN=4;DP4=3,6,13,8;MQ=18	GT:PL:DP:DV:SP:DP4	1/1:75,15,0:5:5:0:0,0,4,1	0/1:71,0,122:25:16:4:3,6,9,7
Locus_2_Transcript_459/4817_Confidence_1.000_Length_247	187	.	A	G	73	PASS	DP=28;VDB=0.0839633;SGB=-0.585322;RPB=0.46131;MQB=0.00334597;MQSB=0.993273;BQB=0.587924;MQ0F=0.107143;ICB=0.3;HOB=0.125;AC=3;AN=4;DP4=1,4,3,16;MQ=19	GT:PL:DP:DV:SP:DP4	1/1:86,12,0:4:4:0:0,0,2,2	0/1:51,0,102:20:15:3:1,4,1,14
Locus_2_Transcript_460/4817_Confidence_1.000_Length_383	99	.	G	A	86	PASS	DP=30;VDB=0.000632106;SGB=-5.02916;RPB=1;MQB=0.0549774;BQB=1;MQ0F=0.133333;ICB=0.5;HOB=0.5;AC=2;AN=4;DP4=9,0,10,0;MQ=22	GT:PL:DP:DV:SP:DP4	0/1:99,0,10:10:7:0:3,0,7,0	0/1:51,0,53:9:3:0:6,0,3,0
Locus_2_Transcript_463/4817_Confidence_1.000_Length_605	473	.	A	G	63	PASS	DP=22;VDB=0.366085;SGB=1.94933;RPB=0.76088;MQB=0.225857;MQSB=0.758573;BQB=0.76088;MQ0F=0.272727;ICB=0.3;HOB=0.125;AC=1;AN=4;DP4=3,10,1,4;MQ=29	GT:PL:DP:DV:SP:DP4	0/0:0,21,122:7:0:0:0,7,0,0	0/1:127,0,74:11:5:3:3,3,1,4
Locus_2_Transcript_464/4817_Confidence_1.000_Length_316	154	.	G	C	190	PASS	DP=78;VDB=0.658302;SGB=-1.3847;RPB=0.303619;MQB=0.856196;MQSB=0.933377;BQB=0.621592;MQ0F=0.0384615;ICB=0.3;HOB=0.125;AC=3;AN=4;DP4=8,2,30,12;MQ=17	GT:PL:DP:DV:SP:DP4	1/1:126,0,0:26:21:0:4,1,15,6	0/1:125,0,12:26:21:0:4,1,15,6
Locus_2_Transcript_465/4817_Confidence_1.000_Length_500	243	.	C	T	109	PASS	DP=38;VDB=0.169243;SGB=-5.95064;RPB=0.411501;MQB=0.778801;MQSB=0.975507;BQB=0.982042;MQ0F=0.0263158;ICB=0.5;HOB=0.5;AC=2;AN=4;DP4=9,3,10,3;MQ=21	GT:PL:DP:DV:SP:DP4	0/1:79,0,30:8:5:0:2,1,4,1	0/1:94,0,86:17:8:0:7,2,6,2
Locus_2_Transcript_465/4817_Confidence_1.000_Length_500	400	.	G	A	93	PASS	DP=79;VDB=0.0239064;SGB=-11.7809;RPB=0.936964;MQB=0.707977;MQSB=0.422752;BQB=0.036814;MQ0F=0.139241;ICB=0.5;HOB=0.5;AC=2;AN=4;DP4=6,10,26,6;MQ=12	GT:PL:DP:DV:SP:DP4	0/1:86,0,58:25:15:18:2,8,11,4	0/1:70,0,5:23:17:6:4,2,15,2
Locus_2_Transcript_475/4817_Confidence_1.000_Length_297	61	.	C	T	119	PASS	DP=29;VDB=0.00209892;SGB=-6.87128;RPB=0.997286;MQB=0.00828359;BQB=0.762053;MQ0F=0.137931;ICB=0.3;HOB=0.125;AC=3;AN=4;DP4=6,0,16,0;MQ=26	GT:PL:DP:DV:SP:DP4	1/1:74,18,0:6:6:0:0,0,6,0	0/1:109,0,111:16:10:0:6,0,10,0
Locus_2_Transcript_475/4817_Confidence_1.000_Length_297	87	.	A	G	122	PASS	DP=48;VDB=0.119766;SGB=-8.71242;RPB=0.809312;MQB=0.00336816;BQB=0.584267;MQ0F=0.0833333;ICB=0.5;HOB=0.5;AC=2;AN=4;DP4=10,0,22,0;MQ=27	GT:PL:DP:DV:SP:DP4	0/1:59,0,54:8:6:0:2,0,6,0	0/1:127,0,120:24:16:0:8,0,16,0
Locus_2_Transcript_475/4817_Confidence_1.000_Length_297	104	.	G	A	119	PASS	DP=65;VDB=0.235225;SGB=-11.4741;RPB=0.507583;MQB=2.4366e-05;BQB=0.983237;MQ0F=0.0615385;ICB=0.5;HOB=0.5;AC=2;AN=4;DP4=14,0,31,0;MQ=27	GT:PL:DP:DV:SP:DP4	0/1:59,0,54:8:6:0:2,0,6,0	0/1:124,0,139:37:25:0:12,0,25,0
Locus_2_Transcript_475/4817_Confidence_1.000_Length_297	156	.	T	C	187	PASS	DP=85;VDB=0.0585406;SGB=-12.7015;RPB=0.190246;MQB=6.6396e-07;MQSB=0.998386;BQB=0.620707;MQ0F=0.0470588;ICB=0.5;HOB=0.5;AC=2;AN=4;DP4=14,4,29,6;MQ=28	GT:PL:DP:DV:SP:DP4	0/1:62,0,78:9:6:0:3,0,5,1	0/1:188,0,223:44:29:3:11,4,24,5
Locus_2_Transcript_475/4817_Confidence_1.000_Length_297	161	.	A	G	199	PASS	DP=85;VDB=0.0524966;SGB=-12.7015;RPB=0.148439;MQB=4.00587e-07;MQSB=0.254738;BQB=0.825254;MQ0F=0.0235294;ICB=0.5;HOB=0.5;AC=2;AN=4;DP4=15,3,25,10;MQ=28	GT:PL:DP:DV:SP:DP4	0/1:63,0,78:9:6:3:3,0,3,3	0/1:199,0,216:44:29:0:12,3,22,7
Locus_2_Transcript_475/4817_Confidence_1.000_Length_297	212	.	T	A	126	PASS	DP=64;VDB=0.012228;SGB=-8.40544;RPB=0.914584;MQB=0.0142515;MQSB=0.65016;BQB=0.281741;MQ0F=0.03125;ICB=0.3;HOB=0.125;AC=1;AN=4;DP4=13,5,10,11;MQ=28	GT:PL:DP:DV:SP:DP4	0/0:0,0,36:3:1:0:2,0,0,1	0/1:188,0,252:36:20:5:11,5,10,10
Locus_2_Transcript_475/4817_Confidence_1.000_Length_297	237	.	C	T	113	PASS	DP=45;VDB=2.15596e-06;SGB=-8.40544;RPB=0.0208679;MQB=0.00212396;MQSB=0.406497;BQB=0.242489;MQ0F=0.0444444;ICB=0.5;HOB=0.5;AC=2;AN=4;DP4=6,7,4,17;MQ=28	GT:PL:DP:DV:SP:DP4	0/1:0,0,36:3:1:0:2,0,0,1	0/1:174,0,213:31:20:4:4,7,4,16
Locus_2_Transcript_477/4817_Confidence_1.000_Length_389	241	.	T	C	68	PASS	DP=38;VDB=0.00395065;SGB=-1.27591;RPB=0.201704;MQB=0.577775;MQSB=0.508648;BQB=0.82972;MQ0F=0.552632;ICB=0.3;HOB=0.125;AC=3;AN=4;DP4=2,1,13,8;MQ=11	GT:PL:DP:DV:SP:DP4	1/1:113,39,0:13:13:0:0,0,8,5	0/1:19,0,46:11:8:0:2,1,5,3
Locus_2_Transcript_484/4817_Confidence_1.000_Length_224	115	.	G	T	349	PASS	DP=128;VDB=0.000493086;SGB=-17.6112;RPB=0.935396;MQB=0.133448;MQSB=0.000114559;BQB=0.7759;MQ0F=0.015625;ICB=0.5;HOB=0.5;AC=2;AN=4;DP4=15,6,44,7;MQ=28	GT:PL:DP:DV:SP:DP4	0/1:201,0,123:37:27:10:7,3,25,2	0/1:213,0,136:35:24:2:8,3,19,5
Locus_2_Transcript_484/4817_Confidence_1.000_Length_224	116	.	T	G	355	PASS	DP=127;VDB=0.000301438;SGB=-17.6112;RPB=0.889829;MQB=0.133448;MQSB=8.14011e-05;BQB=0.873389;MQ0F=0.015748;ICB=0.5;HOB=0.5;AC=2;AN=4;DP4=15,6,43,8;MQ=28	GT:PL:DP:DV:SP:DP4	0/1:194,0,123:37:27:10:7,3,25,2	0/1:226,0,136:35:24:0:8,3,18,6
Locus_2_Transcript_484/4817_Confidence_1.000_Length_224	126	.	T	C	250	PASS	DP=118;VDB=0.00946989;SGB=-11.1672;RPB=0.360868;MQB=0.617268;MQSB=4.81116e-05;BQB=0.0937363;MQ0F=0.0169492;ICB=0.5;HOB=0.5;AC=2;AN=4;DP4=30,12,17,13;MQ=28	GT:PL:DP:DV:SP:DP4	0/1:173,0,239:37:17:13:15,5,7,10	0/1:141,0,237:35:13:1:15,7,10,3
Locus_2_Transcript_484/4817_Confidence_1.000_Length_224	127	.	G	A	148	PASS	DP=114;VDB=0.0120387;SGB=-6.87129;RPB=0.904931;MQB=0.202233;MQSB=0.00122204;BQB=0.605123;MQ0F=0.0175439;ICB=0.5;HOB=0.5;AC=2;AN=4;DP4=36,20,7,9;MQ=28	GT:PL:DP:DV:SP:DP4	0/1:89,0,250:37:8:13:19,10,2,6	0/1:125,0,250:35:8:0:17,10,5,3
Locus_2_Transcript_484/4817_Confidence_1.000_Length_224	152	.	G	C	100	PASS	DP=75;VDB=0.0650136;SGB=-5.95067;RPB=0.819878;MQB=0.101193;MQSB=0.0695992;BQB=0.472333;MQ0F=0.04;ICB=0.5;HOB=0.5;AC=2;AN=4;DP4=22,12,6,7;MQ=29	GT:PL:DP:DV:SP:DP4	0/1:147,0,206:19:7:0:8,4,5,2	0/1:18,0,255:28:6:12:14,8,1,5
Locus_2_Transcript_485/4817_Confidence_1.000_Length_258	174	.	C	T	317	PASS	DP=122;VDB=0.056864;SGB=-9.63298;RPB=0.878693;MQB=0.970853;MQSB=0.827001;BQB=0.819907;MQ0F=0;ICB=0.5;HOB=0.5;AC=2;AN=4;DP4=30,21,16,9;MQ=32	GT:PL:DP:DV:SP:DP4	0/1:215,0,255:38:13:1:19,6,9,4	0/1:166,0,255:38:12:3:11,15,7,5
Locus_2_Transcript_485/4817_Confidence_1.000_Length_258	204	.	G	A	329	PASS	DP=88;VDB=5.10984e-05;SGB=-11.1672;RPB=0.983872;MQB=0.613689;MQSB=0.931217;BQB=0.0115763;MQ0F=0;ICB=0.5;HOB=0.5;AC=2;AN=4;DP4=7,24,20,10;MQ=31	GT:PL:DP:DV:SP:DP4	0/1:186,0,251:32:14:35:5,13,13,1	0/1:206,0,154:29:16:9:2,11,7,9
Locus_2_Transcript_486/4817_Confidence_1.000_Length_232	162	.	T	C	143	PASS	DP=103;VDB=9.70907e-11;SGB=-1.38532;RPB=0.103901;MQB=0.0146535;MQSB=0.998523;BQB=0.501304;MQ0F=0.242718;ICB=0.3;HOB=0.125;AC=3;AN=4;DP4=1,2,36,25;MQ=10	GT:PL:DP:DV:SP:DP4	1/1:97,105,0:35:35:0:0,0,25,10	0/1:111,0,24:29:26:0:1,2,11,15
Locus_2_Transcript_486/4817_Confidence_1.000_Length_232	175	.	G	C	61	PASS	DP=80;VDB=6.05183e-11;SGB=-1.37095;RPB=0.985863;MQB=0.315594;MQSB=0.998651;BQB=0.299654;MQ0F=0.3;ICB=0.3;HOB=0.125;AC=3;AN=4;DP4=1,4,26,17;MQ=9	GT:PL:DP:DV:SP:DP4	1/1:38,12,0:26:26:0:0,0,20,6	0/1:87,0,34:22:17:0:1,4,6,11
Locus_2_Transcript_486/4817_Confidence_1.000_Length_232	206	.	A	T	152	PASS	DP=40;VDB=5.72896e-11;SGB=-1.36953;MQSB=0.992419;MQ0F=0.45;AC=4;AN=4;DP4=0,0,11,16;MQ=11	GT:PL:DP:DV:SP:DP4	1/1:69,42,0:14:14:0:0,0,9,5	1/1:137,39,0:13:13:0:0,0,2,11
Locus_2_Transcript_486/4817_Confidence_1.000_Length_232	210	.	T	C	108	PASS	DP=35;VDB=1.15833e-12;SGB=-1.32441;RPB=1;MQB=1;MQSB=0.963419;BQB=1;MQ0F=0.428571;AC=4;AN=4;DP4=0,1,8,13;MQ=13	GT:PL:DP:DV:SP:DP4	1/1:72,36,0:12:12:0:0,0,7,5	1/1:91,15,0:10:9:0:0,1,1,8
Locus_2_Transcript_487/4817_Confidence_1.000_Length_336	192	.	A	G	346	PASS	DP=100;VDB=8.65235e-18;SGB=-1.38558;RPB=0.94722;MQB=0.975341;MQSB=0.729023;BQB=0.773092;MQ0F=0;ICB=0.5;HOB=0.5;AC=2;AN=4;DP4=1,16,4,59;MQ=40	GT:PL:DP:DV:SP:DP4	0/1:227,0,105:45:36:0:1,8,3,33	0/1:186,0,85:35:27:0:0,8,1,26
Locus_2_Transcript_487/4817_Confidence_1.000_Length_336	195	.	A	G	366	PASS	DP=96;VDB=1.09806e-21;SGB=-19.7591;RPB=0.996542;MQB=0.687543;MQSB=0.723016;BQB=0.458715;MQ0F=0;ICB=0.5;HOB=0.5;AC=2;AN=4;DP4=1,20,4,54;MQ=39	GT:PL:DP:DV:SP:DP4	0/1:243,0,123:45:32:0:1,12,3,29	0/1:189,0,89:34:26:0:0,8,1,25
Locus_2_Transcript_488/4817_Confidence_1.000_Length_253	134	.	A	C	82	PASS	DP=17;VDB=0.674881;SGB=-1.11282;RPB=0.5625;MQB=0.5;MQSB=0.75;BQB=0.625;MQ0F=0.117647;ICB=0.3;HOB=0.125;AC=3;AN=4;DP4=2,0,6,2;MQ=27	GT:PL:DP:DV:SP:DP4	1/1:117,12,0:4:4:0:0,0,4,0	0/1:29,0,60:6:4:3:2,0,2,2
Locus_2_Transcript_494/4817_Confidence_1.000_Length_267	49	.	A	G	241	PASS	DP=218;VDB=3.15324e-12;SGB=-22.2139;RPB=0.421039;MQB=0.74548;BQB=0.857092;MQ0F=0;ICB=0.5;HOB=0.5;AC=2;AN=4;DP4=102,0,66,0;MQ=37	GT:PL:DP:DV:SP:DP4	0/1:127,0,179:51:14:0:37,0,14,0	0/1:178,0,197:117:52:0:65,0,52,0
Locus_2_Transcript_494/4817_Confidence_1.000_Length_267	59	.	A	G	141	PASS	DP=272;VDB=1.32541e-06;SGB=-16.3837;RPB=0.488898;MQB=0.99818;BQB=0.370125;MQ0F=0;ICB=0.5;HOB=0.5;AC=2;AN=4;DP4=141,0,47,0;MQ=38	GT:PL:DP:DV:SP:DP4	0/1:130,0,185:54:15:0:39,0,15,0	0/1:77,0,154:134:32:0:102,0,32,0
Locus_2_Transcript_494/4817_Confidence_1.000_Length_267	210	.	A	G	447	PASS	DP=281;VDB=1.33653e-13;SGB=-26.203;RPB=0.887178;MQB=0.892967;MQSB=0.205201;BQB=0.386449;MQ0F=0.0142349;ICB=0.5;HOB=0.5;AC=2;AN=4;DP4=58,52,34,45;MQ=37	GT:PL:DP:DV:SP:DP4	0/1:255,0,252:52:29:14:19,4,16,13	0/1:255,0,255:137:50:4:39,48,18,32
Locus_2_Transcript_496/4817_Confidence_1.000_Length_248	114	.	C	T	69	PASS	DP=52;VDB=0.286154;SGB=-8.71242;RPB=0.605957;MQB=0.000147982;MQSB=0.655172;BQB=0.735784;MQ0F=0.0769231;ICB=0.5;HOB=0.5;AC=2;AN=4;DP4=9,0,20,2;MQ=21	GT:PL:DP:DV:SP:DP4	0/1:52,0,10:10:9:0:1,0,8,1	0/1:80,0,138:21:13:0:8,0,12,1
Locus_2_Transcript_502/4817_Confidence_1.000_Length_202	55	.	G	A	63	PASS	DP=58;VDB=9.29722e-05;SGB=-5.3356;RPB=0.999541;MQB=0.816842;BQB=0.999885;MQ0F=0.12069;ICB=0.5;HOB=0.5;AC=2;AN=4;DP4=29,0,11,0;MQ=28	GT:PL:DP:DV:SP:DP4	0/1:53,0,64:7:2:0:5,0,2,0	0/1:74,0,165:33:9:0:24,0,9,0
Locus_2_Transcript_502/4817_Confidence_1.000_Length_202	61	.	C	T	212	PASS	DP=68;VDB=6.73091e-07;SGB=1.0766;RPB=0.487805;MQB=0.097561;BQB=0.390244;MQ0F=0.102941;AC=4;AN=4;DP4=2,0,41,0;MQ=29	GT:PL:DP:DV:SP:DP4	1/1:124,21,0:7:7:0:0,0,7,0	1/1:143,29,0:36:34:0:2,0,34,0
Locus_2_Transcript_502/4817_Confidence_1.000_Length_202	62	.	G	A	211	PASS	DP=70;VDB=6.48055e-07;SGB=1.0766;RPB=0.487805;MQB=0.097561;BQB=0.365854;MQ0F=0.1;AC=4;AN=4;DP4=2,0,41,0;MQ=29	GT:PL:DP:DV:SP:DP4	1/1:124,21,0:7:7:0:0,0,7,0	1/1:142,29,0:36:34:0:2,0,34,0
Locus_2_Transcript_502/4817_Confidence_1.000_Length_202	88	.	A	G	179	PASS	DP=101;VDB=0.00586836;SGB=1.98814;RPB=0.0769443;MQB=0.00396228;BQB=0.972175;MQ0F=0.0891089;ICB=0.3;HOB=0.125;AC=3;AN=4;DP4=5,0,46,0;MQ=28	GT:PL:DP:DV:SP:DP4	0/1:106,0,51:9:7:0:2,0,7,0	1/1:137,14,0:42:39:0:3,0,39,0
Locus_2_Transcript_502/4817_Confidence_1.000_Length_202	142	.	C	A	315	PASS	DP=66;VDB=8.91585e-05;SGB=0.561893;RPB=0.978523;MQB=0.0041076;MQSB=0.548649;BQB=0.114057;MQ0F=0.0454545;ICB=0.5;HOB=0.5;AC=2;AN=4;DP4=5,0,18,20;MQ=32	GT:PL:DP:DV:SP:DP4	0/1:126,0,51:9:7:8:2,0,2,5	0/1:255,0,9:34:31:6:3,0,16,15
Locus_2_Transcript_505/4817_Confidence_1.000_Length_266	19	.	A	C	129	PASS	DP=11;VDB=0.000564327;SGB=-1.13755;RPB=1;MQB=1;BQB=1;MQ0F=0;AC=4;AN=4;DP4=1,0,9,0;MQ=34	GT:PL:DP:DV:SP:DP4	1/1:95,12,0:4:4:0:0,0,4,0	1/1:94,0,6:6:5:0:1,0,5,0
Locus_2_Transcript_505/4817_Confidence_1.000_Length_266	80	.	T	C	96	PASS	DP=20;VDB=0.084975;SGB=-4.10417;RPB=0.546428;MQB=0.114218;BQB=0.381255;MQ0F=0;ICB=0.5;HOB=0.5;AC=2;AN=4;DP4=8,0,7,0;MQ=34	GT:PL:DP:DV:SP:DP4	0/1:50,0,89:6:2:0:4,0,2,0	0/1:109,0,53:9:5:0:4,0,5,0
Locus_2_Transcript_507/4817_Confidence_1.000_Length_297	193	.	C	G	68	PASS	DP=22;VDB=0.755557;SGB=-4.41425;RPB=0.97357;MQB=0.0152181;MQSB=0.941512;BQB=0.269146;MQ0F=0;ICB=0.5;HOB=0.5;AC=2;AN=4;DP4=4,3,3,5;MQ=31	GT:PL:DP:DV:SP:DP4	0/1:47,0,138:8:3:0:3,2,1,2	0/1:85,0,58:7:5:0:1,1,2,3
Locus_2_Transcript_508/4817_Confidence_1.000_Length_202	88	.	C	G	66	PASS	DP=46;VDB=0.0455532;SGB=-1.27591;RPB=0.0614494;MQB=0.979382;BQB=0.289443;MQ0F=0.0869565;ICB=0.5;HOB=0.5;AC=2;AN=4;DP4=6,0,21,0;MQ=16	GT:PL:DP:DV:SP:DP4	0/1:89,0,14:17:13:0:4,0,13,0	0/1:42,0,32:10:8:0:2,0,8,0
Locus_2_Transcript_508/4817_Confidence_1.000_Length_202	142	.	T	G	95	PASS	DP=45;VDB=5.47062e-05;SGB=-1.30398;RPB=0.22566;MQB=0.980072;MQSB=0.13687;BQB=0.580257;MQ0F=0.0222222;ICB=0.3;HOB=0.125;AC=3;AN=4;DP4=1,2,18,5;MQ=16	GT:PL:DP:DV:SP:DP4	1/1:115,20,0:16:14:9:0,2,10,4	0/1:43,0,14:10:9:0:1,0,8,1
Locus_2_Transcript_508/4817_Confidence_1.000_Length_202	176	.	A	G	78	PASS	DP=33;VDB=1.67155e-05;SGB=-5.64373;RPB=0.139133;MQB=0.85994;MQSB=0.0551807;BQB=0.977926;MQ0F=0.030303;ICB=0.5;HOB=0.5;AC=2;AN=4;DP4=5,2,9,3;MQ=18	GT:PL:DP:DV:SP:DP4	0/1:104,0,3:9:7:4:1,1,6,1	0/1:37,0,55:10:5:0:4,1,3,2
Locus_2_Transcript_509/4817_Confidence_1.000_Length_213	160	.	C	G	72	PASS	DP=11;VDB=0.0490877;SGB=-1.05588;MQSB=0.810265;MQ0F=0;AC=4;AN=4;DP4=0,0,3,4;MQ=23	GT:PL:DP:DV:SP:DP4	1/1:70,12,0:4:4:0:0,0,0,4	1/1:57,9,0:3:3:0:0,0,3,0
Locus_2_Transcript_512/4817_Confidence_1.000_Length_280	106	.	T	C	71	PASS	DP=22;VDB=0.749879;SGB=-3.78882;RPB=0.920266;MQB=0.899815;BQB=0.245404;MQ0F=0;ICB=0.3;HOB=0.125;AC=3;AN=4;DP4=7,0,6,0;MQ=38	GT:PL:DP:DV:SP:DP4	1/1:23,3,0:1:1:0:0,0,1,0	0/1:111,0,143:12:5:0:7,0,5,0
Locus_2_Transcript_514/4817_Confidence_1.000_Length_630	282	.	A	C	63	PASS	DP=43;VDB=0.529691;SGB=-6.25731;RPB=0.916809;MQB=0.000323438;MQSB=0.982487;BQB=0.360231;MQ0F=0.0697674;ICB=0.5;HOB=0.5;AC=2;AN=4;DP4=14,3,12,2;MQ=30	GT:PL:DP:DV:SP:DP4	0/1:52,0,93:8:3:0:5,0,3,0	0/1:76,0,225:23:11:0:9,3,9,2
Locus_2_Transcript_514/4817_Confidence_1.000_Length_630	302	.	C	T	174	PASS	DP=46;VDB=0.691784;SGB=-8.09871;RPB=0.984635;MQB=0.00204257;MQSB=0.114017;BQB=0.174125;MQ0F=0.0434783;ICB=0.5;HOB=0.5;AC=2;AN=4;DP4=9,1,14,6;MQ=30	GT:PL:DP:DV:SP:DP4	0/1:100,0,21:7:6:0:1,0,6,0	0/1:138,0,177:23:14:8:8,1,8,6
Locus_2_Transcript_514/4817_Confidence_1.000_Length_630	349	.	C	T	64	PASS	DP=42;VDB=0.312296;SGB=-4.72185;RPB=0.966484;MQB=0.107797;MQSB=0.999108;BQB=0.579578;MQ0F=0.0238095;ICB=0.5;HOB=0.5;AC=2;AN=4;DP4=14,8,7,2;MQ=32	GT:PL:DP:DV:SP:DP4	0/1:75,0,68:7:3:0:4,0,2,1	0/1:53,0,255:24:6:5:10,8,5,1
Locus_2_Transcript_514/4817_Confidence_1.000_Length_630	366	.	C	T	194	PASS	DP=45;VDB=0.63308;SGB=-7.48499;RPB=0.582491;MQB=0.602497;MQSB=0.650623;BQB=0.829933;MQ0F=0.0222222;ICB=0.5;HOB=0.5;AC=2;AN=4;DP4=6,11,13,5;MQ=29	GT:PL:DP:DV:SP:DP4	0/1:94,0,58:9:5:8:4,0,2,3	0/1:163,0,160:26:13:29:2,11,11,2
Locus_2_Transcript_523/4817_Confidence_1.000_Length_325	43	.	C	A	81	PASS	DP=16;VDB=0.0827521;SGB=-4.10417;RPB=0.361741;MQB=0.924449;BQB=0.924449;MQ0F=0;ICB=0.5;HOB=0.5;AC=2;AN=4;DP4=4,0,7,0;MQ=31	GT:PL:DP:DV:SP:DP4	0/1:47,0,15:3:2:0:1,0,2,0	0/1:98,0,51:8:5:0:3,0,5,0
Locus_2_Transcript_523/4817_Confidence_1.000_Length_325	149	.	A	T	121	PASS	DP=62;VDB=0.580506;SGB=-6.25703;RPB=0.948219;MQB=0.6111;MQSB=0.293337;BQB=0.344279;MQ0F=0.016129;ICB=0.5;HOB=0.5;AC=2;AN=4;DP4=23,3,14,0;MQ=38	GT:PL:DP:DV:SP:DP4	0/1:28,0,164:9:2:0:6,1,2,0	0/1:158,0,231:31:12:3:17,2,12,0
Locus_2_Transcript_523/4817_Confidence_1.000_Length_325	262	.	G	A	82	PASS	DP=38;VDB=0.072067;SGB=-3.78882;RPB=0.940612;MQB=0.998301;MQSB=0.868509;BQB=0.330924;MQ0F=0.0789474;ICB=0.3;HOB=0.125;AC=1;AN=4;DP4=5,16,3,3;MQ=35	GT:PL:DP:DV:SP:DP4	0/1:146,0,118:9:5:0:3,1,3,2	0/0:0,17,192:18:1:0:2,15,0,1
Locus_2_Transcript_523/4817_Confidence_1.000_Length_325	283	.	T	C	324	PASS	DP=23;VDB=2.91681e-05;SGB=-1.11648;MQSB=0.324652;MQ0F=0.0869565;AC=4;AN=4;DP4=0,0,4,15;MQ=35	GT:PL:DP:DV:SP:DP4	1/1:195,18,0:6:6:0:0,0,3,3	1/1:183,39,0:13:13:0:0,0,1,12
Locus_2_Transcript_523/4817_Confidence_1.000_Length_325	295	.	T	C	115	PASS	DP=19;VDB=0.00758031;SGB=-3.79454;RPB=0.547669;MQB=0.586646;MQSB=0.569783;BQB=0.399018;MQ0F=0.105263;ICB=0.3;HOB=0.125;AC=3;AN=4;DP4=1,7,3,3;MQ=33	GT:PL:DP:DV:SP:DP4	1/1:140,12,0:4:4:0:0,0,3,1	0/1:39,0,99:10:2:0:1,7,0,2
Locus_2_Transcript_527/4817_Confidence_1.000_Length_223	145	.	G	A	112	PASS	DP=49;VDB=0.00180031;SGB=-7.79185;RPB=0.205539;MQB=0.0694155;MQSB=0.651439;BQB=0.474369;MQ0F=0.346939;ICB=0.5;HOB=0.5;AC=2;AN=4;DP4=7,1,11,8;MQ=19	GT:PL:DP:DV:SP:DP4	0/1:79,0,84:8:5:7:3,0,2,3	0/1:96,0,63:19:14:0:4,1,9,5
Locus_2_Transcript_527/4817_Confidence_1.000_Length_223	157	.	G	A	119	PASS	DP=38;VDB=0.00484311;SGB=-5.3363;RPB=0.713793;MQB=0.205401;MQSB=0.748308;BQB=0.484192;MQ0F=0.368421;ICB=0.5;HOB=0.5;AC=2;AN=4;DP4=8,6,4,7;MQ=19	GT:PL:DP:DV:SP:DP4	0/1:64,0,75:8:3:10:0,5,2,1	0/1:119,0,24:17:8:18:8,1,2,6
Locus_2_Transcript_536/4817_Confidence_1.000_Length_475	263	.	C	A	84	PASS	DP=29;VDB=0.25684;SGB=-6.25646;RPB=0.639909;MQB=0.0057376;MQSB=0.969699;BQB=0.199567;MQ0F=0.172414;ICB=0.3;HOB=0.125;AC=3;AN=4;DP4=6,3,7,7;MQ=26	GT:PL:DP:DV:SP:DP4	1/1:37,3,0:1:1:0:0,0,0,1	0/1:110,0,199:22:13:2:6,3,7,6
Locus_2_Transcript_540/4817_Confidence_1.000_Length_207	143	.	G	A	116	PASS	DP=46;VDB=0.00186814;SGB=-1.35517;RPB=0.446289;MQB=0.14358;MQSB=0.969373;BQB=1;MQ0F=0.173913;ICB=0.3;HOB=0.125;AC=3;AN=4;DP4=3,3,13,11;MQ=15	GT:PL:DP:DV:SP:DP4	1/1:114,11,0:15:13:0:1,1,6,7	0/1:66,0,71:15:11:0:2,2,7,4
Locus_2_Transcript_541/4817_Confidence_1.000_Length_323	123	.	T	C	74	PASS	DP=132;VDB=0.305955;SGB=-6.87126;RPB=0.983688;MQB=0.225522;MQSB=0.0177059;BQB=0.687383;MQ0F=0.0151515;ICB=0.3;HOB=0.125;AC=1;AN=4;DP4=63,3,16,0;MQ=35	GT:PL:DP:DV:SP:DP4	0/1:138,0,168:25:11:0:13,1,11,0	0/0:0,30,187:57:5:0:50,2,5,0
Locus_2_Transcript_541/4817_Confidence_1.000_Length_323	191	.	A	G	266	PASS	DP=140;VDB=0.118145;SGB=-10.2467;RPB=0.164455;MQB=0.21257;MQSB=0.709975;BQB=0.328117;MQ0F=0.0285714;ICB=0.5;HOB=0.5;AC=2;AN=4;DP4=47,14,15,12;MQ=34	GT:PL:DP:DV:SP:DP4	0/1:237,0,202:27:13:19:13,1,6,7	0/1:94,0,255:61:14:1:34,13,9,5
Locus_2_Transcript_541/4817_Confidence_1.000_Length_323	286	.	A	C	221	PASS	DP=43;VDB=0.000251677;SGB=-7.485;RPB=0.895424;MQB=0.959033;MQSB=0.895399;BQB=0.631923;MQ0F=0;ICB=0.5;HOB=0.5;AC=2;AN=4;DP4=6,9,4,14;MQ=31	GT:PL:DP:DV:SP:DP4	0/1:117,0,69:9:6:0:0,3,1,5	0/1:167,0,200:24:12:4:6,6,3,9
Locus_2_Transcript_543/4817_Confidence_1.000_Length_359	70	.	C	A	127	PASS	DP=62;VDB=0.000865661;SGB=-5.95067;RPB=0.9652;MQB=0.459701;BQB=0.205458;MQ0F=0;ICB=0.5;HOB=0.5;AC=2;AN=4;DP4=28,0,13,0;MQ=36	GT:PL:DP:DV:SP:DP4	0/1:109,0,170:18:6:0:12,0,6,0	0/1:83,0,166:23:7:0:16,0,7,0
Locus_2_Transcript_543/4817_Confidence_1.000_Length_359	130	.	T	G	159	PASS	DP=100;VDB=0.00294196;SGB=-7.485;RPB=0.849795;MQB=0.0739648;MQSB=0.769064;BQB=0.786933;MQ0F=0;ICB=0.5;HOB=0.5;AC=2;AN=4;DP4=40,5,18,0;MQ=36	GT:PL:DP:DV:SP:DP4	0/1:178,0,139:23:12:0:11,0,12,0	0/1:45,0,255:40:6:0:29,5,6,0
Locus_2_Transcript_543/4817_Confidence_1.000_Length_359	134	.	G	A	291	PASS	DP=102;VDB=0.000410821;SGB=-10.8604;RPB=0.966258;MQB=0.165691;MQSB=0.630779;BQB=0.37548;MQ0F=0;ICB=0.5;HOB=0.5;AC=2;AN=4;DP4=29,5,28,1;MQ=36	GT:PL:DP:DV:SP:DP4	0/1:186,0,109:23:14:0:8,1,14,0	0/1:168,0,255:40:15:2:21,4,14,1
Locus_2_Transcript_544/4817_Confidence_1.000_Length_205	107	.	T	C	200	PASS	DP=72;VDB=0.0409749;SGB=-7.485;RPB=0.998155;MQB=0.924942;MQSB=0.285714;BQB=0.714219;MQ0F=0.0555556;ICB=0.5;HOB=0.5;AC=2;AN=4;DP4=17,2,18,0;MQ=30	GT:PL:DP:DV:SP:DP4	0/1:128,0,135:13:6:0:7,0,6,0	0/1:135,0,136:24:12:3:10,2,12,0
Locus_2_Transcript_547/4817_Confidence_1.000_Length_303	120	.	T	C	221	PASS	DP=482;VDB=1.45734e-09;SGB=-1.38629;RPB=0.634905;MQB=4.98249e-08;MQSB=0.517617;BQB=0.938819;MQ0F=0.026971;ICB=0.3;HOB=0.125;AC=3;AN=4;DP4=47,0,268,9;MQ=25	GT:PL:DP:DV:SP:DP4	0/1:132,0,31:115:94:2:21,0,88,6	1/1:153,142,0:209:183:0:26,0,180,3
Locus_2_Transcript_547/4817_Confidence_1.000_Length_303	133	.	T	A	294	PASS	DP=574;VDB=3.75748e-11;SGB=-1.38629;RPB=0.595061;MQB=0.000265863;MQSB=0.987299;BQB=0.119517;MQ0F=0.0226481;AC=4;AN=4;DP4=44,1,296,13;MQ=25	GT:PL:DP:DV:SP:DP4	1/1:110,67,0:126:113:4:12,1,109,4	1/1:240,159,0:228:196:4:32,0,187,9
Locus_2_Transcript_547/4817_Confidence_1.000_Length_303	141	.	T	A	318	PASS	DP=599;VDB=1.61892e-10;SGB=-1.38629;RPB=0.831037;MQB=3.50871e-08;MQSB=0.515251;BQB=0.881692;MQ0F=0.0217028;AC=4;AN=4;DP4=35,1,336,17;MQ=24	GT:PL:DP:DV:SP:DP4	1/1:118,83,0:140:126:3:13,1,121,5	1/1:255,255,0:249:227:2:22,0,215,12
Locus_2_Transcript_550/4817_Confidence_1.000_Length_600	290	.	A	G	103	PASS	DP=17;VDB=0.899786;SGB=-1.13755;RPB=0.826565;MQB=0.180092;MQSB=0.454545;BQB=0.997028;MQ0F=0.117647;ICB=0.3;HOB=0.125;AC=3;AN=4;DP4=3,1,8,1;MQ=31	GT:PL:DP:DV:SP:DP4	1/1:57,12,0:4:4:0:0,0,4,0	0/1:110,0,110:9:5:0:3,1,4,1
Locus_2_Transcript_550/4817_Confidence_1.000_Length_600	301	.	G	A	72	PASS	DP=18;VDB=0.845044;SGB=-3.47587;RPB=0.84246;MQB=0.306895;MQSB=0.511891;BQB=0.935229;MQ0F=0.111111;ICB=0.5;HOB=0.5;AC=2;AN=4;DP4=6,2,3,2;MQ=32	GT:PL:DP:DV:SP:DP4	0/1:25,0,16:4:1:0:3,0,1,0	0/1:110,0,123:9:4:0:3,2,2,2
Locus_2_Transcript_550/4817_Confidence_1.000_Length_600	316	.	C	T	94	PASS	DP=18;VDB=0.9708;SGB=-3.79454;RPB=0.99308;MQB=0.105399;MQSB=0.697617;BQB=0.605479;MQ0F=0.111111;ICB=0.5;HOB=0.5;AC=2;AN=4;DP4=7,2,4,2;MQ=33	GT:PL:DP:DV:SP:DP4	0/1:53,0,14:5:2:0:3,0,2,0	0/1:104,0,143:10:4:0:4,2,2,2
Locus_2_Transcript_550/4817_Confidence_1.000_Length_600	488	.	A	G	111	PASS	DP=17;VDB=0.316268;SGB=-1.20005;RPB=0.1098;MQB=0.973096;MQSB=0.236928;BQB=0.862013;MQ0F=0.176471;ICB=0.3;HOB=0.125;AC=3;AN=4;DP4=1,2,3,8;MQ=25	GT:PL:DP:DV:SP:DP4	1/1:97,18,0:6:6:0:0,0,1,5	0/1:78,0,71:8:5:0:1,2,2,3
Locus_2_Transcript_565/4817_Confidence_1.000_Length_452	260	.	A	T	83	PASS	DP=17;VDB=0.674881;SGB=-4.41425;RPB=0.187475;MQB=0.765017;MQSB=0.920266;BQB=0.876998;MQ0F=0.117647;ICB=0.3;HOB=0.125;AC=3;AN=4;DP4=3,2,3,5;MQ=28	GT:PL:DP:DV:SP:DP4	1/1:114,9,0:3:3:0:0,0,2,1	0/1:33,0,127:10:5:3:3,2,1,4
Locus_2_Transcript_565/4817_Confidence_1.000_Length_452	272	.	C	A	62	PASS	DP=17;VDB=0.342281;SGB=-4.72185;RPB=1;MQB=0.308647;MQSB=0.740818;BQB=0.726149;MQ0F=0.117647;ICB=0.3;HOB=0.125;AC=3;AN=4;DP4=3,2,3,6;MQ=26	GT:PL:DP:DV:SP:DP4	1/1:92,9,0:3:3:0:0,0,0,3	0/1:34,0,124:11:6:0:3,2,3,3
Locus_2_Transcript_571/4817_Confidence_1.000_Length_274	71	.	G	T	94	PASS	DP=24;VDB=0.0174388;SGB=-5.33664;RPB=0.818054;MQB=0.994437;BQB=0.615112;MQ0F=0.0833333;ICB=0.3;HOB=0.125;AC=3;AN=4;DP4=10,0,11,0;MQ=27	GT:PL:DP:DV:SP:DP4	1/1:71,12,0:4:4:0:0,0,4,0	0/1:87,0,114:17:7:0:10,0,7,0
Locus_2_Transcript_571/4817_Confidence_1.000_Length_274	209	.	A	G	80	PASS	DP=25;VDB=0.289496;SGB=-4.41469;RPB=0.671368;MQB=0.184727;MQSB=0.140122;BQB=0.339296;MQ0F=0;ICB=0.5;HOB=0.5;AC=2;AN=4;DP4=4,4,1,7;MQ=33	GT:PL:DP:DV:SP:DP4	0/1:82,0,79:7:4:3:2,1,1,3	0/1:62,0,145:9:4:4:2,3,0,4
Locus_2_Transcript_572/4817_Confidence_1.000_Length_1206	40	.	G	A	127	PASS	DP=34;VDB=0.00485879;SGB=-5.64373;RPB=0.434501;MQB=0.520364;BQB=0.996422;MQ0F=0;ICB=0.3;HOB=0.125;AC=3;AN=4;DP4=18,0,12,0;MQ=35	GT:PL:DP:DV:SP:DP4	1/1:115,15,0:5:5:0:0,0,5,0	0/1:77,0,162:25:7:0:18,0,7,0
Locus_2_Transcript_572/4817_Confidence_1.000_Length_1206	154	.	C	A	347	PASS	DP=140;VDB=0.687925;SGB=-13.0084;RPB=0.0323179;MQB=0.942583;MQSB=0.0266264;BQB=0.465117;MQ0F=0;ICB=0.3;HOB=0.125;AC=3;AN=4;DP4=53,12,28,8;MQ=40	GT:PL:DP:DV:SP:DP4	1/1:255,54,0:18:18:0:0,0,15,3	0/1:157,0,255:83:18:3:53,12,13,5
Locus_2_Transcript_572/4817_Confidence_1.000_Length_1206	499	.	A	G	425	PASS	DP=179;VDB=0.0656548;SGB=-13.9289;RPB=0.344204;MQB=0.706961;MQSB=0.849382;BQB=0.618007;MQ0F=0;ICB=0.5;HOB=0.5;AC=2;AN=4;DP4=61,33,23,16;MQ=41	GT:PL:DP:DV:SP:DP4	0/1:249,0,255:29:13:12:13,3,6,7	0/1:240,0,255:104:26:1:48,30,17,9
Locus_2_Transcript_572/4817_Confidence_1.000_Length_1206	543	.	T	C	190	PASS	DP=150;VDB=0.00312099;SGB=49.7367;RPB=0.983328;MQB=0.816521;MQSB=0.768253;BQB=0.9916;MQ0F=0;ICB=0.3;HOB=0.125;AC=1;AN=4;DP4=32,18,34,40;MQ=41	GT:PL:DP:DV:SP:DP4	0/0:0,99,255:33:0:0:22,11,0,0	0/1:255,0,142:91:74:4:10,7,34,40
Locus_2_Transcript_572/4817_Confidence_1.000_Length_1206	571	.	A	C	190	PASS	DP=157;VDB=0.152938;SGB=46.9641;RPB=0.723589;MQB=0.863688;MQSB=0.962595;BQB=0.951101;MQ0F=0;ICB=0.3;HOB=0.125;AC=1;AN=4;DP4=34,19,31,39;MQ=41	GT:PL:DP:DV:SP:DP4	0/0:0,102,255:34:0:0:22,12,0,0	0/1:255,0,184:89:70:7:12,7,31,39
Locus_2_Transcript_574/4817_Confidence_1.000_Length_790	138	.	C	G	96	PASS	DP=17;VDB=0.869527;SGB=-4.10598;RPB=0.361741;MQB=0.361741;BQB=0.200967;MQ0F=0;ICB=0.3;HOB=0.125;AC=3;AN=4;DP4=4,0,7,0;MQ=36	GT:PL:DP:DV:SP:DP4	1/1:57,9,0:3:3:0:0,0,3,0	0/1:103,0,109:8:4:0:4,0,4,0
Locus_2_Transcript_574/4817_Confidence_1.000_Length_790	387	.	G	A	99	PASS	DP=20;VDB=0.16689;SGB=4.00342;RPB=0.785785;MQB=0.785785;MQSB=0.735784;BQB=0.816632;MQ0F=0;ICB=1;HOB=0.5;AC=1;AN=2;DP4=5,2,6,2;MQ=35	GT:PL:DP:DV:SP:DP4	./.:0,0,0:0:0:0:0,0,0,0	0/1:159,0,148:15:8:0:5,2,6,2
Locus_2_Transcript_576/4817_Confidence_1.000_Length_659	301	.	T	G	74	PASS	DP=19;VDB=0.140004;SGB=2.63044;RPB=0.274466;MQB=0.833753;MQSB=0.338465;BQB=0.955563;MQ0F=0.0526316;ICB=0.5;HOB=0.5;AC=2;AN=4;DP4=7,4,6,0;MQ=38	GT:PL:DP:DV:SP:DP4	1/1:143,18,0:6:6:0:0,0,6,0	0/0:0,33,245:11:0:0:7,4,0,0
Locus_2_Transcript_576/4817_Confidence_1.000_Length_659	412	.	T	C	135	PASS	DP=28;VDB=0.510937;SGB=3.31571;RPB=0.999305;MQB=1;MQSB=1;BQB=0.993758;MQ0F=0;ICB=0.5;HOB=0.5;AC=2;AN=4;DP4=8,6,2,5;MQ=42	GT:PL:DP:DV:SP:DP4	1/1:204,21,0:7:7:0:0,0,2,5	0/0:0,42,255:14:0:0:8,6,0,0
Locus_2_Transcript_576/4817_Confidence_1.000_Length_659	514	.	C	A	142	PASS	DP=21;VDB=0.905336;SGB=4.00342;RPB=0.114218;MQB=0.720273;MQSB=0.720273;BQB=0.985046;MQ0F=0;ICB=0.3;HOB=0.125;AC=1;AN=4;DP4=3,4,5,3;MQ=41	GT:PL:DP:DV:SP:DP4	0/0:0,9,92:3:0:0:0,3,0,0	0/1:206,0,110:12:8:0:3,1,5,3
Locus_2_Transcript_577/4817_Confidence_1.000_Length_487	171	.	T	G	140	PASS	DP=28;VDB=0.219793;SGB=-4.72185;RPB=0.543691;MQB=0.878264;MQSB=0.759781;BQB=0.746718;MQ0F=0;ICB=0.5;HOB=0.5;AC=2;AN=4;DP4=14,2,7,2;MQ=39	GT:PL:DP:DV:SP:DP4	0/1:93,0,2:4:3:0:1,0,2,1	0/1:109,0,207:21:6:0:13,2,5,1
Locus_2_Transcript_577/4817_Confidence_1.000_Length_487	235	.	T	C	232	PASS	DP=37;VDB=0.336237;SGB=-6.56424;RPB=0.576778;MQB=0.532719;MQSB=0.906686;BQB=0.306895;MQ0F=0;ICB=0.5;HOB=0.5;AC=2;AN=4;DP4=12,0,8,7;MQ=40	GT:PL:DP:DV:SP:DP4	0/1:76,0,111:8:3:0:5,0,3,0	0/1:219,0,128:19:12:18:7,0,5,7
Locus_2_Transcript_577/4817_Confidence_1.000_Length_487	272	.	G	A	75	PASS	DP=39;VDB=0.403259;SGB=4.69269;RPB=0.541392;MQB=0.752432;MQSB=0.871846;BQB=0.513275;MQ0F=0;ICB=0.3;HOB=0.125;AC=1;AN=4;DP4=14,6,1,8;MQ=39	GT:PL:DP:DV:SP:DP4	0/0:0,18,160:6:0:0:6,0,0,0	0/1:139,0,255:23:9:14:8,6,1,8
Locus_2_Transcript_577/4817_Confidence_1.000_Length_487	338	.	T	C	180	PASS	DP=33;VDB=0.437875;SGB=-5.95036;RPB=0.767272;MQB=0.125315;MQSB=0.994723;BQB=0.423873;MQ0F=0;ICB=0.5;HOB=0.5;AC=2;AN=4;DP4=4,10,5,8;MQ=39	GT:PL:DP:DV:SP:DP4	0/1:89,0,111:8:3:10:0,5,2,1	0/1:155,0,211:19:10:2:4,5,3,7
Locus_2_Transcript_577/4817_Confidence_1.000_Length_487	345	.	A	C	203	PASS	DP=32;VDB=0.256416;SGB=-6.56403;RPB=0.273507;MQB=0.213769;MQSB=0.998591;BQB=0.708895;MQ0F=0;ICB=0.5;HOB=0.5;AC=2;AN=4;DP4=2,10,6,9;MQ=39	GT:PL:DP:DV:SP:DP4	0/1:50,0,141:8:2:3:1,5,1,1	0/1:216,0,123:19:13:2:1,5,5,8
Locus_2_Transcript_578/4817_Confidence_1.000_Length_1215	547	.	C	T	76	PASS	DP=32;VDB=0.695866;SGB=-6.25731;RPB=0.993166;MQB=0.0560386;MQSB=0.954545;BQB=0.99615;MQ0F=0.125;ICB=0.5;HOB=0.5;AC=2;AN=4;DP4=9,1,13,1;MQ=27	GT:PL:DP:DV:SP:DP4	0/1:48,0,79:7:3:0:4,0,3,0	0/1:91,0,116:17:11:0:5,1,10,1
Locus_2_Transcript_578/4817_Confidence_1.000_Length_1215	591	.	C	T	120	PASS	DP=34;VDB=0.0176886;SGB=-5.64361;RPB=0.534863;MQB=0.114218;MQSB=0.987474;BQB=0.3611;MQ0F=0.0294118;ICB=0.5;HOB=0.5;AC=2;AN=4;DP4=6,2,11,1;MQ=31	GT:PL:DP:DV:SP:DP4	0/1:105,0,54:7:4:0:3,0,4,0	0/1:79,0,131:13:8:3:3,2,7,1
Locus_2_Transcript_578/4817_Confidence_1.000_Length_1215	624	.	A	T	100	PASS	DP=55;VDB=0.474446;SGB=-6.25752;RPB=0.166156;MQB=0.00121564;MQSB=0.705889;BQB=0.908364;MQ0F=0;ICB=0.5;HOB=0.5;AC=2;AN=4;DP4=20,3,14,0;MQ=33	GT:PL:DP:DV:SP:DP4	0/1:71,0,109:11:5:0:6,0,5,0	0/1:93,0,230:26:9:3:14,3,9,0
Locus_2_Transcript_578/4817_Confidence_1.000_Length_1215	626	.	A	T	100	PASS	DP=55;VDB=0.490226;SGB=-6.25752;RPB=0.156508;MQB=0.00121564;MQSB=0.705889;BQB=0.908364;MQ0F=0;ICB=0.5;HOB=0.5;AC=2;AN=4;DP4=20,3,14,0;MQ=33	GT:PL:DP:DV:SP:DP4	0/1:71,0,115:11:5:0:6,0,5,0	0/1:93,0,230:26:9:3:14,3,9,0
Locus_2_Transcript_578/4817_Confidence_1.000_Length_1215	654	.	C	T,G	104	PASS	DP=68;VDB=0.957787;SGB=-9.63298;RPB=0.537907;MQB=0.0153297;MQSB=0.779453;BQB=0.844939;MQ0F=0;ICB=0.5;HOB=0.5;AC=1,1;AN=4;DP4=13,6,24,1;MQ=33	GT:PL:DP:DV:SP:DP4	0/1:106,0,80,102,83,182:12:8:0:4,0,7,1	0/2:125,93,255,0,212,249:32:17:23:9,6,17,0
Locus_2_Transcript_578/4817_Confidence_1.000_Length_1215	677	.	A	C	200	PASS	DP=54;VDB=0.00927932;SGB=-8.71241;RPB=0.962675;MQB=0.0147369;MQSB=0.64756;BQB=0.974531;MQ0F=0;ICB=0.5;HOB=0.5;AC=2;AN=4;DP4=9,5,19,3;MQ=33	GT:PL:DP:DV:SP:DP4	0/1:72,0,90:9:5:7:1,3,4,1	0/1:191,0,188:27:17:2:8,2,15,2
Locus_2_Transcript_578/4817_Confidence_1.000_Length_1215	680	.	C	T	203	PASS	DP=54;VDB=0.011264;SGB=-8.71241;RPB=0.914865;MQB=0.0147369;MQSB=0.64756;BQB=0.962675;MQ0F=0;ICB=0.5;HOB=0.5;AC=2;AN=4;DP4=9,5,19,3;MQ=33	GT:PL:DP:DV:SP:DP4	0/1:72,0,86:9:5:7:1,3,4,1	0/1:194,0,188:27:17:2:8,2,15,2
Locus_2_Transcript_578/4817_Confidence_1.000_Length_1215	694	.	T	C	171	PASS	DP=63;VDB=0.0883558;SGB=-8.40553;RPB=0.973548;MQB=0.00290319;MQSB=0.0727446;BQB=0.986415;MQ0F=0;ICB=0.5;HOB=0.5;AC=2;AN=4;DP4=22,3,16,5;MQ=35	GT:PL:DP:DV:SP:DP4	0/1:32,0,171:12:3:6:7,2,1,2	0/1:203,0,197:34:18:2:15,1,15,3
Locus_2_Transcript_578/4817_Confidence_1.000_Length_1215	747	.	C	T	78	PASS	DP=58;VDB=0.82583;SGB=6.76576;RPB=0.724923;MQB=0.402851;MQSB=0.151921;BQB=0.162464;MQ0F=0;ICB=0.3;HOB=0.125;AC=1;AN=4;DP4=27,10,10,2;MQ=39	GT:PL:DP:DV:SP:DP4	0/0:0,21,176:7:0:0:3,4,0,0	0/1:143,0,255:42:12:0:24,6,10,2
Locus_2_Transcript_578/4817_Confidence_1.000_Length_1215	967	.	A	G	184	PASS	DP=54;VDB=0.943079;SGB=-6.56442;RPB=0.304188;MQB=0.000199684;MQSB=0.84795;BQB=0.476276;MQ0F=0;ICB=0.5;HOB=0.5;AC=2;AN=4;DP4=18,8,10,5;MQ=37	GT:PL:DP:DV:SP:DP4	0/1:139,0,110:11:6:0:5,0,5,1	0/1:109,0,255:30:9:0:13,8,5,4
Locus_2_Transcript_578/4817_Confidence_1.000_Length_1215	1049	.	A	C	68	PASS	DP=47;VDB=0.929985;SGB=-5.0263;RPB=0.922581;MQB=0.00502289;MQSB=0.546855;BQB=0.257165;MQ0F=0;ICB=0.5;HOB=0.5;AC=2;AN=4;DP4=14,7,7,3;MQ=37	GT:PL:DP:DV:SP:DP4	0/1:19,0,132:6:1:0:5,0,0,1	0/1:116,0,255:25:9:4:9,7,7,2
Locus_2_Transcript_578/4817_Confidence_1.000_Length_1215	1051	.	T	C	76	PASS	DP=45;VDB=0.913584;SGB=-5.0263;RPB=0.107298;MQB=0.00502289;MQSB=0.986928;BQB=0.356243;MQ0F=0;ICB=0.5;HOB=0.5;AC=2;AN=4;DP4=14,7,5,5;MQ=37	GT:PL:DP:DV:SP:DP4	0/1:19,0,132:6:1:0:5,0,0,1	0/1:124,0,255:25:9:0:9,7,5,4
Locus_2_Transcript_578/4817_Confidence_1.000_Length_1215	1103	.	A	C	71	PASS	DP=32;VDB=0.0588086;SGB=4.69269;RPB=0.120513;MQB=0.0140035;MQSB=0.076757;BQB=0.822012;MQ0F=0;ICB=0.3;HOB=0.125;AC=1;AN=4;DP4=4,11,5,4;MQ=36	GT:PL:DP:DV:SP:DP4	0/0:0,12,113:4:0:0:0,4,0,0	0/1:135,0,231:20:9:2:4,7,5,4
Locus_2_Transcript_581/4817_Confidence_1.000_Length_240	69	.	T	C	180	PASS	DP=46;VDB=0.00694485;SGB=-6.56424;RPB=0.143019;MQB=0.987952;BQB=0.201286;MQ0F=0;ICB=0.3;HOB=0.125;AC=3;AN=4;DP4=11,0,15,0;MQ=39	GT:PL:DP:DV:SP:DP4	0/1:52,0,178:14:3:0:11,0,3,0	1/1:193,36,0:12:12:0:0,0,12,0
Locus_2_Transcript_581/4817_Confidence_1.000_Length_240	85	.	C	T	115	PASS	DP=47;VDB=0.00292017;SGB=-5.02822;RPB=0.0356245;MQB=0.731616;BQB=0.573753;MQ0F=0;ICB=0.5;HOB=0.5;AC=2;AN=4;DP4=16,0,10,0;MQ=39	GT:PL:DP:DV:SP:DP4	0/1:35,0,177:14:2:0:12,0,2,0	0/1:144,0,80:12:8:0:4,0,8,0
Locus_2_Transcript_581/4817_Confidence_1.000_Length_240	150	.	T	G	143	PASS	DP=46;VDB=0.0462669;SGB=-4.72062;RPB=0.247299;MQB=0.216731;MQSB=0.633328;BQB=0.960777;MQ0F=0.217391;ICB=0.5;HOB=0.5;AC=2;AN=4;DP4=12,6,7,2;MQ=31	GT:PL:DP:DV:SP:DP4	0/1:32,0,168:15:2:0:9,4,1,1	0/1:175,0,124:12:7:3:3,2,6,1
Locus_2_Transcript_582/4817_Confidence_1.000_Length_317	71	.	G	T	64	PASS	DP=53;VDB=0.0392049;SGB=-9.32613;RPB=0.921579;MQB=0.0272215;BQB=0.91051;MQ0F=0.0943396;ICB=0.5;HOB=0.5;AC=2;AN=4;DP4=15,0,24,0;MQ=21	GT:PL:DP:DV:SP:DP4	0/1:54,0,67:13:9:0:4,0,9,0	0/1:73,0,106:26:15:0:11,0,15,0
Locus_2_Transcript_582/4817_Confidence_1.000_Length_317	159	.	A	G	75	PASS	DP=86;VDB=0.397568;SGB=-12.0878;RPB=0.834374;MQB=1.35373e-07;MQSB=0.135014;BQB=0.463156;MQ0F=0.0232558;ICB=0.5;HOB=0.5;AC=2;AN=4;DP4=21,6,25,8;MQ=23	GT:PL:DP:DV:SP:DP4	0/1:47,0,115:16:11:0:4,1,7,4	0/1:92,0,234:44:22:0:17,5,18,4
Locus_2_Transcript_582/4817_Confidence_1.000_Length_317	178	.	T	A	91	PASS	DP=108;VDB=0.420165;SGB=-14.2358;RPB=0.644354;MQB=3.79601e-10;MQSB=0.394656;BQB=0.449891;MQ0F=0.00925926;ICB=0.5;HOB=0.5;AC=2;AN=4;DP4=25,5,34,6;MQ=25	GT:PL:DP:DV:SP:DP4	0/1:78,0,116:27:21:0:5,1,17,4	0/1:77,0,253:43:19:2:20,4,17,2
Locus_2_Transcript_582/4817_Confidence_1.000_Length_317	191	.	G	A	163	PASS	DP=116;VDB=0.599649;SGB=-17.3043;RPB=0.16386;MQB=5.91069e-12;MQSB=0.675431;BQB=0.966926;MQ0F=0.00862069;ICB=0.5;HOB=0.5;AC=2;AN=4;DP4=20,9,37,13;MQ=25	GT:PL:DP:DV:SP:DP4	0/1:101,0,104:32:26:12:2,4,20,6	0/1:125,0,255:47:24:1:18,5,17,7
Locus_2_Transcript_582/4817_Confidence_1.000_Length_317	202	.	A	C	157	PASS	DP=130;VDB=0.20354;SGB=-16.6906;RPB=0.0556889;MQB=1.0525e-10;MQSB=0.782957;BQB=0.519074;MQ0F=0.0230769;ICB=0.5;HOB=0.5;AC=2;AN=4;DP4=21,9,35,13;MQ=25	GT:PL:DP:DV:SP:DP4	0/1:108,0,96:33:27:8:2,4,20,7	0/1:112,0,255:45:21:1:19,5,15,6
Locus_2_Transcript_582/4817_Confidence_1.000_Length_317	257	.	A	G	128	PASS	DP=89;VDB=2.68497e-06;SGB=-14.2358;RPB=0.346889;MQB=1.24344e-05;MQSB=0.9249;BQB=0.934352;MQ0F=0.0449438;ICB=0.3;HOB=0.125;AC=3;AN=4;DP4=9,6,24,16;MQ=20	GT:PL:DP:DV:SP:DP4	1/1:120,21,0:21:20:0:1,0,17,3	0/1:73,0,225:34:20:5:8,6,7,13
Locus_2_Transcript_582/4817_Confidence_1.000_Length_317	278	.	A	G	148	PASS	DP=78;VDB=1.87235e-07;SGB=-1.38362;RPB=0.393566;MQB=9.79235e-05;MQSB=0.532386;BQB=0.566631;MQ0F=0.0512821;ICB=0.3;HOB=0.125;AC=3;AN=4;DP4=8,4,19,20;MQ=20	GT:PL:DP:DV:SP:DP4	1/1:145,21,0:21:20:0:1,0,14,6	0/1:68,0,198:30:19:12:7,4,5,14
Locus_2_Transcript_583/4817_Confidence_1.000_Length_207	147	.	T	G	154	PASS	DP=21;VDB=0.0309482;SGB=-0.809454;MQSB=0.989343;MQ0F=0.047619;AC=4;AN=4;DP4=0,0,8,5;MQ=19	GT:PL:DP:DV:SP:DP4	1/1:91,9,0:3:3:0:0,0,1,2	1/1:117,30,0:10:10:0:0,0,7,3
Locus_2_Transcript_584/4817_Confidence_1.000_Length_289	151	.	T	C	64	PASS	DP=17;VDB=0.0423326;SGB=-4.40924;RPB=0.397295;MQB=0.793923;MQSB=0.760054;BQB=0.236382;MQ0F=0;ICB=0.3;HOB=0.125;AC=3;AN=4;DP4=1,3,6,2;MQ=23	GT:PL:DP:DV:SP:DP4	0/1:8,0,67:5:1:0:1,3,1,0	1/1:121,21,0:7:7:0:0,0,5,2
Locus_2_Transcript_584/4817_Confidence_1.000_Length_289	183	.	T	G	104	PASS	DP=20;VDB=0.422799;SGB=-0.751012;RPB=0.2;MQB=0.35;MQSB=0.968069;BQB=0.6;MQ0F=0;ICB=0.3;HOB=0.125;AC=3;AN=4;DP4=2,0,6,4;MQ=21	GT:PL:DP:DV:SP:DP4	0/1:34,0,14:3:2:0:1,0,2,0	1/1:133,18,0:9:8:0:1,0,4,4
Locus_2_Transcript_584/4817_Confidence_1.000_Length_289	193	.	G	A	93	PASS	DP=18;VDB=0.560035;SGB=-0.827256;RPB=0.333333;MQB=0.388889;MQSB=0.891517;BQB=0.333333;MQ0F=0;ICB=0.3;HOB=0.125;AC=3;AN=4;DP4=2,0,3,6;MQ=21	GT:PL:DP:DV:SP:DP4	0/1:38,0,14:3:2:0:1,0,1,1	1/1:118,15,0:8:7:0:1,0,2,5
Locus_2_Transcript_591/4817_Confidence_1.000_Length_912	257	.	C	G	67	PASS	DP=16;VDB=0.0270423;SGB=-3.47587;RPB=0.41985;MQB=1;MQSB=1;BQB=0.591555;MQ0F=0;ICB=0.5;HOB=0.5;AC=2;AN=4;DP4=7,1,2,3;MQ=42	GT:PL:DP:DV:SP:DP4	0/1:117,0,27:5:4:0:1,0,2,2	0/1:13,0,163:8:1:0:6,1,0,1
Locus_2_Transcript_591/4817_Confidence_1.000_Length_912	408	.	T	G	254	PASS	DP=24;VDB=0.82869;SGB=-5.33677;RPB=0.542747;MQB=0.955563;MQSB=0.928603;BQB=0.0545253;MQ0F=0;ICB=0.3;HOB=0.125;AC=3;AN=4;DP4=5,1,4,7;MQ=41	GT:PL:DP:DV:SP:DP4	1/1:165,15,0:5:5:0:0,0,2,3	0/1:153,0,158:12:6:6:5,1,2,4
Locus_2_Transcript_591/4817_Confidence_1.000_Length_912	446	.	G	C	152	PASS	DP=19;VDB=0.950798;SGB=-4.41469;RPB=0.434598;MQB=0.740818;MQSB=0.966012;BQB=0.0301345;MQ0F=0;ICB=0.3;HOB=0.125;AC=3;AN=4;DP4=5,1,2,6;MQ=41	GT:PL:DP:DV:SP:DP4	1/1:113,12,0:4:4:0:0,0,1,3	0/1:103,0,162:10:4:7:5,1,1,3
Locus_2_Transcript_591/4817_Confidence_1.000_Length_912	634	.	C	T	103	PASS	DP=26;VDB=0.388649;SGB=-4.10417;RPB=0.980568;MQB=0.234257;MQSB=0.321925;BQB=0.962269;MQ0F=0;ICB=0.5;HOB=0.5;AC=2;AN=4;DP4=10,3,3,4;MQ=35	GT:PL:DP:DV:SP:DP4	0/1:58,0,95:6:2:0:4,0,2,0	0/1:109,0,153:14:5:6:6,3,1,4
Locus_2_Transcript_591/4817_Confidence_1.000_Length_912	641	.	C	G	109	PASS	DP=26;VDB=0.383129;SGB=-4.10417;RPB=0.98752;MQB=0.234257;MQSB=0.321925;BQB=0.992961;MQ0F=0;ICB=0.5;HOB=0.5;AC=2;AN=4;DP4=10,3,3,4;MQ=35	GT:PL:DP:DV:SP:DP4	0/1:58,0,95:6:2:0:4,0,2,0	0/1:115,0,153:14:5:6:6,3,1,4
Locus_2_Transcript_592/4817_Confidence_1.000_Length_232	135	.	C	T	279	PASS	DP=51;VDB=0.0875879;SGB=-1.20208;RPB=0.947546;MQB=0.143754;MQSB=0.754946;BQB=0.999461;MQ0F=0;ICB=0.3;HOB=0.125;AC=3;AN=4;DP4=3,1,20,4;MQ=31	GT:PL:DP:DV:SP:DP4	0/1:157,0,87:20:16:0:3,1,16,0	1/1:187,24,0:8:8:0:0,0,4,4
Locus_2_Transcript_592/4817_Confidence_1.000_Length_232	183	.	T	A	219	PASS	DP=34;VDB=1.00678e-05;SGB=-0.933126;RPB=0.460355;MQB=0.0653974;MQSB=0.147827;BQB=0.952672;MQ0F=0;ICB=0.3;HOB=0.125;AC=3;AN=4;DP4=4,2,9,6;MQ=33	GT:PL:DP:DV:SP:DP4	0/1:158,0,154:17:11:0:4,2,7,4	1/1:125,12,0:4:4:0:0,0,2,2
Locus_2_Transcript_597/4817_Confidence_1.000_Length_1989	365	.	C	A	70	PASS	DP=44;VDB=0.17561;SGB=3.31571;RPB=0.5634;MQB=1;MQSB=1;BQB=0.189695;MQ0F=0;ICB=0.3;HOB=0.125;AC=1;AN=4;DP4=15,10,6,1;MQ=42	GT:PL:DP:DV:SP:DP4	0/1:134,0,237:19:7:2:8,4,6,1	0/0:0,39,255:13:0:0:7,6,0,0
Locus_2_Transcript_597/4817_Confidence_1.000_Length_1989	717	.	G	A	103	PASS	DP=51;VDB=0.876045;SGB=-5.02916;RPB=0.437922;MQB=0.396248;MQSB=0.904837;BQB=0.662703;MQ0F=0.117647;ICB=0.3;HOB=0.125;AC=1;AN=4;DP4=19,5,8,2;MQ=38	GT:PL:DP:DV:SP:DP4	0/0:0,21,255:16:3:0:10,3,3,0	0/1:167,0,205:18:7:0:9,2,5,2
Locus_2_Transcript_597/4817_Confidence_1.000_Length_1989	1485	.	C	T	225	PASS	DP=29;VDB=0.012353;SGB=-5.02916;RPB=0.917201;MQB=1;MQSB=1;BQB=0.437922;MQ0F=0;ICB=0.3;HOB=0.125;AC=3;AN=4;DP4=4,6,6,4;MQ=42	GT:PL:DP:DV:SP:DP4	1/1:218,21,0:7:7:0:0,0,5,2	0/1:72,0,233:13:3:0:4,6,1,2
Locus_2_Transcript_597/4817_Confidence_1.000_Length_1989	1506	.	G	A	103	PASS	DP=26;VDB=0.0115144;SGB=2.63044;RPB=0.155433;MQB=1;MQSB=1;BQB=0.991383;MQ0F=0;ICB=0.3;HOB=0.125;AC=1;AN=4;DP4=5,8,3,3;MQ=42	GT:PL:DP:DV:SP:DP4	0/1:168,0,21:7:6:0:1,0,3,3	0/0:0,36,255:12:0:0:4,8,0,0
Locus_2_Transcript_616/4817_Confidence_1.000_Length_363	272	.	A	C	81	PASS	DP=41;VDB=0.102332;SGB=-6.87129;RPB=0.198623;MQB=0.00267117;MQSB=0.802047;BQB=0.049027;MQ0F=0.0731707;ICB=0.5;HOB=0.5;AC=2;AN=4;DP4=8,5,4,12;MQ=24	GT:PL:DP:DV:SP:DP4	0/0:0,9,255:21:8:12:8,5,1,7	1/1:149,24,0:8:8:0:0,0,3,5
Locus_2_Transcript_617/4817_Confidence_1.000_Length_237	61	.	G	T	156	PASS	DP=330;VDB=3.60687e-40;SGB=4.23737;RPB=0.0285541;MQB=0.0125957;BQB=0.126916;MQ0F=0.0212121;AC=4;AN=4;DP4=3,0,187,0;MQ=19	GT:PL:DP:DV:SP:DP4	1/1:113,255,0:146:144:0:2,0,144,0	1/1:98,95,0:44:43:0:1,0,43,0
Locus_2_Transcript_617/4817_Confidence_1.000_Length_237	71	.	A	G	151	PASS	DP=350;VDB=1.00424e-37;SGB=5.00801;RPB=0.0403522;MQB=0.0125633;BQB=0.470459;MQ0F=0.02;AC=4;AN=4;DP4=3,0,191,0;MQ=18	GT:PL:DP:DV:SP:DP4	1/1:113,255,0:150:148:0:2,0,148,0	1/1:93,90,0:44:43:0:1,0,43,0
Locus_2_Transcript_617/4817_Confidence_1.000_Length_237	75	.	G	T	152	PASS	DP=358;VDB=1.11171e-37;SGB=5.00801;RPB=0.0403522;MQB=0.0125633;BQB=0.367687;MQ0F=0.0195531;AC=4;AN=4;DP4=3,0,191,0;MQ=18	GT:PL:DP:DV:SP:DP4	1/1:114,255,0:150:148:0:2,0,148,0	1/1:93,90,0:44:43:0:1,0,43,0
Locus_2_Transcript_617/4817_Confidence_1.000_Length_237	100	.	A	T	148	PASS	DP=400;VDB=1.66383e-21;SGB=6.40396;RPB=0.122935;MQB=0.0124334;MQSB=1;BQB=0.907427;MQ0F=0.02;AC=4;AN=4;DP4=3,0,208,1;MQ=18	GT:PL:DP:DV:SP:DP4	1/1:111,255,0:165:163:0:2,0,162,1	1/1:92,99,0:47:46:0:1,0,46,0
Locus_2_Transcript_617/4817_Confidence_1.000_Length_237	150	.	C	T	291	PASS	DP=254;VDB=1.00704e-13;SGB=3.68396;RPB=0.983906;MQB=0.0126363;MQSB=0.0527667;BQB=0.158492;MQ0F=0.0354331;AC=4;AN=4;DP4=3,0,61,98;MQ=17	GT:PL:DP:DV:SP:DP4	1/1:188,255,0:125:123:7:2,0,53,70	1/1:158,69,0:37:36:0:1,0,8,28
Locus_2_Transcript_617/4817_Confidence_1.000_Length_237	177	.	T	C	225	PASS	DP=132;VDB=6.54409e-11;SGB=-0.227594;RPB=0.237922;MQB=0.0141408;MQSB=0.471379;BQB=0.960901;MQ0F=0.0530303;AC=4;AN=4;DP4=2,1,41,42;MQ=16	GT:PL:DP:DV:SP:DP4	1/1:168,118,0:64:62:0:1,1,35,27	1/1:112,24,0:22:21:0:1,0,6,15
Locus_2_Transcript_617/4817_Confidence_1.000_Length_237	193	.	T	A	238	PASS	DP=89;VDB=6.63843e-21;SGB=-0.0741466;RPB=0.618644;MQB=0.0762712;MQSB=0.978866;BQB=0.305085;MQ0F=0.0561798;AC=4;AN=4;DP4=2,0,22,37;MQ=16	GT:PL:DP:DV:SP:DP4	1/1:185,79,0:47:45:7:2,0,19,26	1/1:108,42,0:14:14:0:0,0,3,11
Locus_2_Transcript_617/4817_Confidence_1.000_Length_237	194	.	T	G	206	PASS	DP=89;VDB=1.36609e-20;SGB=-0.573839;RPB=0.228025;MQB=0.654777;MQSB=0.978866;BQB=0.768028;MQ0F=0.0561798;AC=4;AN=4;DP4=3,3,21,34;MQ=16	GT:PL:DP:DV:SP:DP4	1/1:153,17,0:47:41:0:3,3,18,23	1/1:108,42,0:14:14:0:0,0,3,11
Locus_2_Transcript_617/4817_Confidence_1.000_Length_237	212	.	G	A	70	PASS	DP=63;VDB=2.73474e-07;SGB=-7.48493;RPB=0.962671;MQB=0.717769;MQSB=0.999658;BQB=0.784803;MQ0F=0.0793651;ICB=0.5;HOB=0.5;AC=2;AN=4;DP4=12,11,10,8;MQ=16	GT:PL:DP:DV:SP:DP4	0/1:105,0,111:34:15:5:9,10,10,5	0/1:28,0,19:7:3:8:3,1,0,3
Locus_2_Transcript_621/4817_Confidence_1.000_Length_276	29	.	A	C	161	PASS	DP=23;VDB=5.51542e-08;SGB=-0.949327;RPB=0.236847;MQB=0.0161635;BQB=0.540226;MQ0F=0;ICB=0.5;HOB=0.5;AC=2;AN=4;DP4=4,0,11,0;MQ=39	GT:PL:DP:DV:SP:DP4	0/1:148,0,10:9:8:0:1,0,8,0	0/1:77,0,82:6:3:0:3,0,3,0
Locus_2_Transcript_621/4817_Confidence_1.000_Length_276	55	.	T	C	156	PASS	DP=40;VDB=0.00123685;SGB=-7.17813;RPB=0.0808708;MQB=1.42857e-05;BQB=0.175471;MQ0F=0;ICB=0.5;HOB=0.5;AC=2;AN=4;DP4=14,0,17,0;MQ=34	GT:PL:DP:DV:SP:DP4	0/1:139,0,105:18:12:0:6,0,12,0	0/1:80,0,144:13:5:0:8,0,5,0
Locus_2_Transcript_621/4817_Confidence_1.000_Length_276	77	.	T	A	170	PASS	DP=59;VDB=0.0659943;SGB=-9.01927;RPB=0.95671;MQB=3.01918e-06;BQB=0.947374;MQ0F=0.0677966;ICB=0.5;HOB=0.5;AC=2;AN=4;DP4=14,0,23,0;MQ=30	GT:PL:DP:DV:SP:DP4	0/1:129,0,104:22:16:0:6,0,16,0	0/1:104,0,155:15:7:0:8,0,7,0
Locus_2_Transcript_621/4817_Confidence_1.000_Length_276	115	.	T	G	160	PASS	DP=76;VDB=0.0416141;SGB=-7.79186;RPB=0.107932;MQB=0.13979;BQB=0.935071;MQ0F=0.118421;ICB=0.5;HOB=0.5;AC=2;AN=4;DP4=23,0,19,0;MQ=27	GT:PL:DP:DV:SP:DP4	0/1:122,0,141:25:12:0:13,0,12,0	0/1:102,0,162:17:7:0:10,0,7,0
Locus_2_Transcript_621/4817_Confidence_1.000_Length_276	149	.	C	G	71	PASS	DP=67;VDB=0.00273679;SGB=-7.17815;RPB=0.808831;MQB=0.00281707;MQSB=0.131905;BQB=0.919133;MQ0F=0.149254;ICB=0.5;HOB=0.5;AC=2;AN=4;DP4=19,3,13,4;MQ=25	GT:PL:DP:DV:SP:DP4	0/1:16,0,181:22:9:0:12,1,8,1	0/1:120,0,197:17:8:2:7,2,5,3
Locus_2_Transcript_653/4817_Confidence_1.000_Length_300	183	.	T	C	103	PASS	DP=15;VDB=0.660869;SGB=-3.78882;RPB=0.864013;MQB=0.186356;MQSB=0.793923;BQB=0.372712;MQ0F=0;ICB=0.5;HOB=0.5;AC=2;AN=4;DP4=0,6,4,2;MQ=33	GT:PL:DP:DV:SP:DP4	0/1:34,0,17:2:1:0:0,1,1,0	0/1:133,0,84:10:5:8:0,5,3,2
Locus_2_Transcript_653/4817_Confidence_1.000_Length_300	194	.	A	G	94	PASS	DP=16;VDB=0.0710944;SGB=-4.41269;RPB=0.493254;MQB=0.444281;MQSB=0.793923;BQB=0.174611;MQ0F=0;ICB=0.3;HOB=0.125;AC=3;AN=4;DP4=3,1,1,7;MQ=33	GT:PL:DP:DV:SP:DP4	1/1:63,6,0:2:2:0:0,0,1,1	0/1:95,0,102:10:6:15:3,1,0,6
Locus_2_Transcript_653/4817_Confidence_1.000_Length_300	220	.	A	C	67	PASS	DP=12;VDB=0.00276675;SGB=-0.751815;RPB=0.809011;MQB=0.809011;MQSB=0.428571;BQB=0.809011;MQ0F=0;ICB=0.3;HOB=0.125;AC=3;AN=4;DP4=1,2,1,5;MQ=35	GT:PL:DP:DV:SP:DP4	1/1:40,3,0:1:1:0:0,0,1,0	0/1:90,0,68:8:5:0:1,2,0,5
Locus_2_Transcript_750/4817_Confidence_1.000_Length_255	69	.	T	G	80	PASS	DP=49;VDB=0.041198;SGB=-5.33677;RPB=0.257014;MQB=0.817244;BQB=0.999411;MQ0F=0;ICB=0.5;HOB=0.5;AC=2;AN=4;DP4=25,0,11,0;MQ=36	GT:PL:DP:DV:SP:DP4	0/1:63,0,167:17:5:0:12,0,5,0	0/1:83,0,163:19:6:0:13,0,6,0
Locus_2_Transcript_750/4817_Confidence_1.000_Length_255	123	.	C	T	101	PASS	DP=89;VDB=0.00948041;SGB=6.07412;RPB=0.84089;MQB=0.999699;MQSB=0.00546429;BQB=0.610497;MQ0F=0;ICB=0.3;HOB=0.125;AC=1;AN=4;DP4=30,7,11,0;MQ=38	GT:PL:DP:DV:SP:DP4	0/0:0,60,255:20:0:0:17,3,0,0	0/1:165,0,239:28:11:9:13,4,11,0
Locus_2_Transcript_750/4817_Confidence_1.000_Length_255	125	.	T	C	67	PASS	DP=87;VDB=0.521411;SGB=4.00342;RPB=0.927743;MQB=0.748727;MQSB=0.00120901;BQB=0.997611;MQ0F=0;ICB=0.3;HOB=0.125;AC=1;AN=4;DP4=34,6,6,2;MQ=38	GT:PL:DP:DV:SP:DP4	0/1:131,0,204:20:8:0:10,2,6,2	0/0:0,84,255:28:0:0:24,4,0,0
Locus_2_Transcript_750/4817_Confidence_1.000_Length_255	130	.	C	T	101	PASS	DP=87;VDB=0.00898234;SGB=6.07412;RPB=0.950426;MQB=0.999699;MQSB=0.00120901;BQB=0.647628;MQ0F=0;ICB=0.3;HOB=0.125;AC=1;AN=4;DP4=29,8,11,0;MQ=38	GT:PL:DP:DV:SP:DP4	0/0:0,60,255:20:0:0:16,4,0,0	0/1:165,0,246:28:11:9:13,4,11,0
Locus_2_Transcript_750/4817_Confidence_1.000_Length_255	196	.	G	A	67	PASS	DP=46;VDB=0.00150379;SGB=-4.09964;RPB=0.969852;MQB=0.846482;MQSB=0.736714;BQB=0.964711;MQ0F=0;ICB=0.3;HOB=0.125;AC=1;AN=4;DP4=9,19,2,5;MQ=41	GT:PL:DP:DV:SP:DP4	0/0:1,0,204:12:1:0:2,9,0,1	0/1:130,0,255:23:6:0:7,10,2,4
Locus_2_Transcript_753/4817_Confidence_1.000_Length_524	229	.	T	C	191	PASS	DP=22;VDB=0.812537;SGB=-0.561957;RPB=0.951229;MQB=0.419767;MQSB=0.320984;BQB=0.978023;MQ0F=0.0909091;ICB=0.3;HOB=0.125;AC=3;AN=4;DP4=3,2,8,4;MQ=34	GT:PL:DP:DV:SP:DP4	0/1:39,0,147:7:2:0:3,2,2,0	1/1:217,30,0:10:10:0:0,0,6,4
Locus_2_Transcript_754/4817_Confidence_1.000_Length_549	160	.	C	T	151	PASS	DP=48;VDB=0.0282565;SGB=4.69269;RPB=0.542568;MQB=1;MQSB=1;BQB=0.983927;MQ0F=0;ICB=0.3;HOB=0.125;AC=1;AN=4;DP4=16,2,7,2;MQ=42	GT:PL:DP:DV:SP:DP4	0/1:215,0,132:15:9:3:6,0,7,2	0/0:0,36,255:12:0:0:10,2,0,0
Locus_2_Transcript_756/4817_Confidence_1.000_Length_412	265	.	C	A	93	PASS	DP=58;VDB=0.701527;SGB=-1.31369;RPB=0.0399776;MQB=0.0075475;MQSB=1;BQB=0.149733;MQ0F=0.224138;ICB=0.3;HOB=0.125;AC=3;AN=4;DP4=8,0,24,2;MQ=17	GT:PL:DP:DV:SP:DP4	0/1:95,0,130:16:10:0:6,0,10,0	1/1:63,21,0:18:16:0:2,0,14,2
Locus_2_Transcript_756/4817_Confidence_1.000_Length_412	277	.	A	G	67	PASS	DP=61;VDB=0.512083;SGB=-5.02822;RPB=0.613251;MQB=0.698199;MQSB=0.13283;BQB=0.0874813;MQ0F=0.262295;ICB=0.3;HOB=0.125;AC=1;AN=4;DP4=22,4,5,5;MQ=18	GT:PL:DP:DV:SP:DP4	0/1:131,0,166:18:8:0:7,3,5,3	0/0:0,32,81:18:2:17:15,1,0,2
Locus_2_Transcript_756/4817_Confidence_1.000_Length_412	307	.	A	G	140	PASS	DP=56;VDB=0.0556097;SGB=-7.48501;RPB=0.323274;MQB=0.834702;MQSB=0.0722931;BQB=0.646902;MQ0F=0.285714;ICB=0.3;HOB=0.125;AC=3;AN=4;DP4=12,6,8,10;MQ=18	GT:PL:DP:DV:SP:DP4	0/1:119,0,164:18:9:0:5,4,4,5	1/1:84,5,0:18:9:5:7,2,4,5
Locus_2_Transcript_760/4817_Confidence_1.000_Length_477	265	.	T	C	93	PASS	DP=21;VDB=0.118055;SGB=3.31571;RPB=0.959011;MQB=1;MQSB=1;BQB=0.477935;MQ0F=0;ICB=0.3;HOB=0.125;AC=1;AN=4;DP4=5,3,1,6;MQ=42	GT:PL:DP:DV:SP:DP4	0/1:157,0,134:12:7:3:2,3,1,6	0/0:0,9,105:3:0:0:3,0,0,0
Locus_2_Transcript_764/4817_Confidence_1.000_Length_399	128	.	T	C	96	PASS	DP=38;VDB=0.466716;SGB=4.00342;RPB=0.509156;MQB=1;BQB=0.875173;MQ0F=0;ICB=0.3;HOB=0.125;AC=1;AN=4;DP4=15,0,8,0;MQ=42	GT:PL:DP:DV:SP:DP4	0/1:161,0,68:11:8:0:3,0,8,0	0/0:0,36,206:12:0:0:12,0,0,0
Locus_2_Transcript_764/4817_Confidence_1.000_Length_399	164	.	G	A	102	PASS	DP=44;VDB=0.568173;SGB=3.31571;RPB=0.264512;MQB=1;MQSB=1;BQB=0.594829;MQ0F=0;ICB=0.3;HOB=0.125;AC=1;AN=4;DP4=13,9,6,1;MQ=42	GT:PL:DP:DV:SP:DP4	0/1:166,0,197:15:7:5:4,4,6,1	0/0:0,42,255:14:0:0:9,5,0,0
Locus_2_Transcript_764/4817_Confidence_1.000_Length_399	307	.	A	G	98	PASS	DP=10;VDB=0.159034;SGB=-3.4825;RPB=0.900802;MQB=0.900802;MQSB=1;BQB=0.900802;MQ0F=0;ICB=0.3;HOB=0.125;AC=3;AN=4;DP4=1,2,1,4;MQ=42	GT:PL:DP:DV:SP:DP4	0/1:53,0,95:5:2:0:1,2,0,2	1/1:109,9,0:3:3:0:0,0,1,2
Locus_2_Transcript_765/4817_Confidence_1.000_Length_783	92	.	G	A	64	PASS	DP=10;VDB=0.23997;SGB=-3.1648;RPB=0.62023;MQB=0.992367;BQB=0.248092;MQ0F=0;ICB=0.3;HOB=0.125;AC=3;AN=4;DP4=4,0,4,0;MQ=42	GT:PL:DP:DV:SP:DP4	0/1:55,0,89:6:2:0:4,0,2,0	1/1:72,6,0:2:2:0:0,0,2,0
Locus_2_Transcript_766/4817_Confidence_1.000_Length_288	245	.	G	T	63	PASS	DP=14;VDB=0.0331786;SGB=-3.1648;RPB=0.162433;MQB=0.89338;MQSB=0.89338;BQB=0.487298;MQ0F=0;ICB=0.3;HOB=0.125;AC=3;AN=4;DP4=4,1,1,3;MQ=41	GT:PL:DP:DV:SP:DP4	1/1:79,6,0:2:2:0:0,0,1,1	0/1:48,0,148:7:2:8:4,1,0,2
Locus_2_Transcript_776/4817_Confidence_1.000_Length_302	118	.	T	C	276	PASS	DP=116;VDB=0.368494;SGB=-15.1563;RPB=0.230558;MQB=0.0195683;MQSB=0.0896256;BQB=0.527436;MQ0F=0.00862069;ICB=0.5;HOB=0.5;AC=2;AN=4;DP4=22,2,41,2;MQ=32	GT:PL:DP:DV:SP:DP4	0/1:145,0,112:18:12:0:6,0,12,0	0/1:195,0,206:49:31:2:16,2,29,2
Locus_2_Transcript_779/4817_Confidence_1.000_Length_328	304	.	A	G	151	PASS	DP=34;VDB=1.4999e-06;SGB=10.9211;RPB=0.572451;MQB=0.440232;MQSB=0.347149;BQB=0.415181;MQ0F=0;ICB=0.5;HOB=0.5;AC=2;AN=4;DP4=3,8,1,17;MQ=33	GT:PL:DP:DV:SP:DP4	0/0:0,33,211:11:0:0:3,8,0,0	1/1:220,54,0:18:18:0:0,0,1,17
Locus_2_Transcript_779/4817_Confidence_1.000_Length_328	308	.	G	A	85	PASS	DP=33;VDB=3.60194e-05;SGB=8.15014;RPB=0.424373;MQB=0.116623;MQSB=0.347149;BQB=0.343417;MQ0F=0;ICB=0.3;HOB=0.125;AC=1;AN=4;DP4=4,11,0,14;MQ=33	GT:PL:DP:DV:SP:DP4	0/0:0,33,211:11:0:0:3,8,0,0	0/1:150,0,62:18:14:0:1,3,0,14
Locus_2_Transcript_780/4817_Confidence_1.000_Length_335	59	.	A	G	178	PASS	DP=279;VDB=8.22013e-14;SGB=-1.28314;RPB=0.845368;MQB=7.88127e-07;BQB=0.984222;MQ0F=0.136201;ICB=0.3;HOB=0.125;AC=3;AN=4;DP4=51,0,150,0;MQ=17	GT:PL:DP:DV:SP:DP4	0/1:70,0,151:95:44:0:51,0,44,0	1/1:172,255,0:106:106:0:0,0,106,0
Locus_2_Transcript_781/4817_Confidence_1.000_Length_300	48	.	C	T	75	PASS	DP=108;VDB=0.00271977;SGB=7.4578;RPB=0.30063;MQB=0.231272;BQB=0.670447;MQ0F=0.0555556;ICB=0.3;HOB=0.125;AC=1;AN=4;DP4=68,0,13,0;MQ=30	GT:PL:DP:DV:SP:DP4	0/0:0,132,211:44:0:0:44,0,0,0	0/1:139,0,140:37:13:0:24,0,13,0
Locus_2_Transcript_781/4817_Confidence_1.000_Length_300	57	.	C	G	97	PASS	DP=123;VDB=0.000949056;SGB=13.0002;RPB=0.901861;MQB=0.933189;BQB=0.570891;MQ0F=0.0487805;ICB=0.3;HOB=0.125;AC=1;AN=4;DP4=63,0,21,0;MQ=31	GT:PL:DP:DV:SP:DP4	0/1:161,0,175:46:21:0:25,0,21,0	0/0:0,114,209:38:0:0:38,0,0,0
Locus_2_Transcript_781/4817_Confidence_1.000_Length_300	258	.	C	T	191	PASS	DP=116;VDB=1.55395e-09;SGB=-13.9289;RPB=0.373542;MQB=0.0207448;MQSB=0.80945;BQB=0.644025;MQ0F=0.0172414;ICB=0.3;HOB=0.125;AC=1;AN=4;DP4=15,41,6,33;MQ=36	GT:PL:DP:DV:SP:DP4	0/0:0,73,255:39:2:0:12,25,0,2	0/1:255,0,209:56:37:0:3,16,6,31
Locus_2_Transcript_783/4817_Confidence_1.000_Length_779	205	.	C	A	126	PASS	DP=28;VDB=0.660946;SGB=4.69269;RPB=0.247924;MQB=0.878264;MQSB=0.878264;BQB=0.98056;MQ0F=0;ICB=0.3;HOB=0.125;AC=1;AN=4;DP4=6,10,3,6;MQ=40	GT:PL:DP:DV:SP:DP4	0/0:0,9,97:3:0:0:3,0,0,0	0/1:190,0,226:22:9:2:3,10,3,6
Locus_2_Transcript_783/4817_Confidence_1.000_Length_779	207	.	C	T	126	PASS	DP=29;VDB=0.676899;SGB=4.69269;RPB=0.272074;MQB=0.878264;MQSB=0.878264;BQB=0.990034;MQ0F=0;ICB=0.3;HOB=0.125;AC=1;AN=4;DP4=6,10,3,6;MQ=40	GT:PL:DP:DV:SP:DP4	0/0:0,9,101:3:0:0:3,0,0,0	0/1:190,0,224:22:9:2:3,10,3,6
Locus_2_Transcript_783/4817_Confidence_1.000_Length_779	590	.	G	A	96	PASS	DP=21;VDB=0.670308;SGB=2.63044;RPB=0.85394;MQB=0.397664;MQSB=0.161271;BQB=0.531752;MQ0F=0.238095;ICB=0.5;HOB=0.5;AC=2;AN=4;DP4=4,8,4,2;MQ=28	GT:PL:DP:DV:SP:DP4	1/1:164,7,0:9:6:8:0,3,4,2	0/0:0,27,196:9:0:0:4,5,0,0
Locus_2_Transcript_788/4817_Confidence_1.000_Length_991	765	.	A	G	61	PASS	DP=25;VDB=0.602287;SGB=-3.79454;RPB=0.999321;MQB=0.676174;MQSB=0.98316;BQB=0.82174;MQ0F=0.12;ICB=0.5;HOB=0.5;AC=2;AN=4;DP4=3,13,3,3;MQ=35	GT:PL:DP:DV:SP:DP4	0/1:17,0,154:11:2:0:1,8,0,2	0/1:109,0,144:11:4:6:2,5,3,1
Locus_2_Transcript_789/4817_Confidence_1.000_Length_242	182	.	T	C	88	PASS	DP=18;VDB=0.000384375;SGB=-4.10417;RPB=0.916482;MQB=0.641538;MQSB=0.5;BQB=0.824834;MQ0F=0;ICB=0.5;HOB=0.5;AC=2;AN=4;DP4=3,0,5,2;MQ=29	GT:PL:DP:DV:SP:DP4	0/1:94,0,8:7:5:0:2,0,5,0	0/1:59,0,33:3:2:0:1,0,0,2
Locus_2_Transcript_792/4817_Confidence_1.000_Length_445	151	.	T	C	110	PASS	DP=29;VDB=0.0147822;SGB=-1.23633;RPB=0.0795595;MQB=0.546074;MQSB=0.268726;BQB=0.859633;MQ0F=0.103448;ICB=0.3;HOB=0.125;AC=3;AN=4;DP4=3,1,13,2;MQ=22	GT:PL:DP:DV:SP:DP4	1/1:107,27,0:9:9:0:0,0,9,0	0/1:67,0,82:10:6:0:3,1,4,2
Locus_2_Transcript_793/4817_Confidence_1.000_Length_404	202	.	T	C	138	PASS	DP=23;VDB=0.0840715;SGB=-4.41425;RPB=0.702619;MQB=0.998622;MQSB=1;BQB=0.819936;MQ0F=0.0869565;ICB=0.3;HOB=0.125;AC=3;AN=4;DP4=7,1,8,0;MQ=39	GT:PL:DP:DV:SP:DP4	1/1:136,15,0:5:5:0:0,0,5,0	0/1:66,0,166:11:3:0:7,1,3,0
Locus_2_Transcript_794/4817_Confidence_1.000_Length_495	281	.	A	T	104	PASS	DP=22;VDB=0.234327;SGB=-1.04872;RPB=0.90252;MQB=0.193781;MQSB=0.236382;BQB=0.730444;MQ0F=0;ICB=0.5;HOB=0.5;AC=2;AN=4;DP4=4,0,9,4;MQ=23	GT:PL:DP:DV:SP:DP4	0/1:102,0,27:5:4:0:1,0,3,1	0/1:67,0,45:12:9:3:3,0,6,3
Locus_2_Transcript_794/4817_Confidence_1.000_Length_495	294	.	G	A	68	PASS	DP=26;VDB=0.0759711;SGB=-1.162;RPB=0.898397;MQB=0.249431;MQSB=0.324652;BQB=0.857027;MQ0F=0;ICB=0.5;HOB=0.5;AC=2;AN=4;DP4=4,1,11,3;MQ=22	GT:PL:DP:DV:SP:DP4	0/1:66,0,24:6:5:0:1,0,5,0	0/1:66,0,66:13:9:0:3,1,6,3
Locus_2_Transcript_794/4817_Confidence_1.000_Length_495	389	.	A	G	85	PASS	DP=31;VDB=0.000437354;SGB=-1.24744;RPB=0.284674;MQB=0.0336741;MQSB=0.987578;BQB=0.397295;MQ0F=0;ICB=0.5;HOB=0.5;AC=2;AN=4;DP4=4,0,8,5;MQ=23	GT:PL:DP:DV:SP:DP4	0/1:53,0,78:9:6:0:3,0,5,1	0/1:96,0,18:8:7:0:1,0,3,4
Locus_2_Transcript_795/4817_Confidence_1.000_Length_238	75	.	C	G	93	PASS	DP=81;VDB=0.435222;SGB=-6.25755;RPB=0.276401;MQB=0.574401;BQB=0.568561;MQ0F=0;ICB=0.5;HOB=0.5;AC=2;AN=4;DP4=41,0,14,0;MQ=36	GT:PL:DP:DV:SP:DP4	0/1:56,0,181:23:6:0:17,0,6,0	0/1:103,0,180:32:8:0:24,0,8,0
Locus_2_Transcript_803/4817_Confidence_1.000_Length_412	125	.	C	T	123	PASS	DP=59;VDB=0.436619;SGB=-8.40557;RPB=0.901646;MQB=0.0166285;MQSB=0.986238;BQB=0.991311;MQ0F=0.101695;ICB=0.5;HOB=0.5;AC=2;AN=4;DP4=15,2,19,2;MQ=26	GT:PL:DP:DV:SP:DP4	0/1:84,0,40:13:10:0:3,0,10,0	0/1:102,0,203:25:11:0:12,2,9,2
Locus_2_Transcript_803/4817_Confidence_1.000_Length_412	173	.	G	A	140	PASS	DP=52;VDB=0.87833;SGB=-7.17815;RPB=0.876362;MQB=0.0726684;MQSB=0.804563;BQB=0.660912;MQ0F=0.0769231;ICB=0.5;HOB=0.5;AC=2;AN=4;DP4=14,7,12,5;MQ=31	GT:PL:DP:DV:SP:DP4	0/1:71,0,68:10:7:3:1,2,5,2	0/1:133,0,255:28:10:0:13,5,7,3
Locus_2_Transcript_803/4817_Confidence_1.000_Length_412	282	.	A	G	118	PASS	DP=76;VDB=0.0161029;SGB=-5.33419;RPB=0.194687;MQB=0.527712;MQSB=0.0281896;BQB=0.709106;MQ0F=0;ICB=0.3;HOB=0.125;AC=1;AN=4;DP4=26,10,5,6;MQ=32	GT:PL:DP:DV:SP:DP4	0/0:0,34,191:19:1:0:17,1,0,1	0/1:182,0,255:28:10:0:9,9,5,5
Locus_2_Transcript_803/4817_Confidence_1.000_Length_412	287	.	C	T	125	PASS	DP=69;VDB=0.00269644;SGB=5.38303;RPB=0.389519;MQB=0.18208;MQSB=0.040715;BQB=0.719096;MQ0F=0;ICB=0.3;HOB=0.125;AC=1;AN=4;DP4=24,8,5,5;MQ=32	GT:PL:DP:DV:SP:DP4	0/0:0,54,205:18:0:0:17,1,0,0	0/1:189,0,233:24:10:0:7,7,5,5
Locus_2_Transcript_803/4817_Confidence_1.000_Length_412	307	.	C	G	66	PASS	DP=68;VDB=0.094989;SGB=-4.72062;RPB=0.944738;MQB=0.992511;MQSB=0.522373;BQB=0.436594;MQ0F=0.0294118;ICB=0.3;HOB=0.125;AC=1;AN=4;DP4=21,12,5,4;MQ=30	GT:PL:DP:DV:SP:DP4	0/0:0,25,238:18:2:0:12,4,2,0	0/1:130,0,237:24:7:0:9,8,3,4
Locus_2_Transcript_807/4817_Confidence_1.000_Length_277	118	.	C	T	80	PASS	DP=47;VDB=0.225248;SGB=-6.25745;RPB=0.384297;MQB=0.152007;MQSB=0.291667;BQB=0.0921606;MQ0F=0;ICB=0.5;HOB=0.5;AC=2;AN=4;DP4=13,0,10,4;MQ=24	GT:PL:DP:DV:SP:DP4	0/1:42,0,41:7:4:8:3,0,1,3	0/1:101,0,128:20:10:0:10,0,9,1
Locus_2_Transcript_807/4817_Confidence_1.000_Length_277	193	.	C	T	141	PASS	DP=40;VDB=0.00341695;SGB=-1.09901;RPB=0.478261;MQB=0.956522;MQSB=0.0112639;BQB=0.782609;MQ0F=0.1;AC=4;AN=4;DP4=2,0,13,10;MQ=15	GT:PL:DP:DV:SP:DP4	1/1:59,21,0:7:7:0:0,0,6,1	1/1:137,21,0:18:16:3:2,0,7,9
Locus_2_Transcript_807/4817_Confidence_1.000_Length_277	209	.	T	A	80	PASS	DP=39;VDB=0.000570458;SGB=-7.1781;RPB=0.539212;MQB=0.729697;MQSB=0.0149892;BQB=0.482841;MQ0F=0.102564;ICB=0.5;HOB=0.5;AC=2;AN=4;DP4=6,1,8,9;MQ=16	GT:PL:DP:DV:SP:DP4	0/1:19,0,16:7:4:0:3,0,3,1	0/1:125,0,21:17:13:5:3,1,5,8
Locus_2_Transcript_808/4817_Confidence_1.000_Length_412	160	.	A	G	66	PASS	DP=87;VDB=0.167798;SGB=-5.95055;RPB=0.763372;MQB=0.0245219;MQSB=0.0290191;BQB=0.85394;MQ0F=0.16092;ICB=0.5;HOB=0.5;AC=2;AN=4;DP4=33,5,13,0;MQ=14	GT:PL:DP:DV:SP:DP4	0/1:43,0,24:20:4:0:16,0,4,0	0/1:86,0,69:31:9:5:17,5,9,0
Locus_2_Transcript_808/4817_Confidence_1.000_Length_412	171	.	A	G	132	PASS	DP=82;VDB=0.295043;SGB=-1.3702;RPB=0.912813;MQB=0.314937;MQSB=0.575018;BQB=0.454235;MQ0F=0.121951;ICB=0.5;HOB=0.5;AC=2;AN=4;DP4=10,1,31,5;MQ=15	GT:PL:DP:DV:SP:DP4	0/1:78,0,16:20:15:3:5,0,12,3	0/1:119,0,23:27:21:3:5,1,19,2
Locus_2_Transcript_808/4817_Confidence_1.000_Length_412	195	.	A	G	138	PASS	DP=65;VDB=0.3256;SGB=-9.63298;RPB=0.540593;MQB=0.516667;MQSB=0.669782;BQB=0.953866;MQ0F=0.107692;ICB=0.5;HOB=0.5;AC=2;AN=4;DP4=11,5,14,11;MQ=15	GT:PL:DP:DV:SP:DP4	0/1:82,0,21:15:10:0:2,3,4,6	0/1:120,0,88:26:15:2:9,2,10,5
Locus_2_Transcript_808/4817_Confidence_1.000_Length_412	208	.	C	A	179	PASS	DP=55;VDB=0.833152;SGB=-10.2467;RPB=0.974294;MQB=0.98063;MQSB=0.820282;BQB=0.292909;MQ0F=0.0545455;ICB=0.5;HOB=0.5;AC=2;AN=4;DP4=8,4,17,10;MQ=20	GT:PL:DP:DV:SP:DP4	0/1:88,0,32:8:5:7:3,0,2,3	0/1:156,0,62:31:22:2:5,4,15,7
Locus_2_Transcript_808/4817_Confidence_1.000_Length_412	209	.	A	G	179	PASS	DP=55;VDB=0.824634;SGB=-10.2467;RPB=0.97757;MQB=0.98063;MQSB=0.820282;BQB=0.329041;MQ0F=0.0545455;ICB=0.5;HOB=0.5;AC=2;AN=4;DP4=8,4,17,10;MQ=20	GT:PL:DP:DV:SP:DP4	0/1:88,0,32:8:5:7:3,0,2,3	0/1:156,0,62:31:22:2:5,4,15,7
Locus_2_Transcript_808/4817_Confidence_1.000_Length_412	244	.	G	A	186	PASS	DP=54;VDB=0.999803;SGB=-8.40556;RPB=0.81174;MQB=0.989284;MQSB=0.0365838;BQB=0.580948;MQ0F=0.0185185;ICB=0.5;HOB=0.5;AC=2;AN=4;DP4=8,9,16,5;MQ=23	GT:PL:DP:DV:SP:DP4	0/1:114,0,59:10:6:0:2,2,3,3	0/1:136,0,142:28:15:14:6,7,13,2
Locus_2_Transcript_808/4817_Confidence_1.000_Length_412	277	.	A	G	176	PASS	DP=41;VDB=0.394515;SGB=-0.474587;RPB=0.937378;MQB=0.00229965;MQSB=0.297797;BQB=0.772075;MQ0F=0.0731707;ICB=0.5;HOB=0.5;AC=2;AN=4;DP4=5,2,12,8;MQ=28	GT:PL:DP:DV:SP:DP4	0/1:52,0,120:8:4:0:2,2,1,3	0/1:187,0,50:19:16:3:3,0,11,5
Locus_2_Transcript_810/4817_Confidence_1.000_Length_328	158	.	C	T	160	PASS	DP=37;VDB=0.880127;SGB=-0.0899686;RPB=0.22566;MQB=0.055103;MQSB=0.927171;BQB=0.999195;MQ0F=0.135135;ICB=0.3;HOB=0.125;AC=3;AN=4;DP4=2,1,16,7;MQ=22	GT:PL:DP:DV:SP:DP4	0/1:28,0,55:6:4:0:2,0,4,0	1/1:197,23,0:20:19:0:0,1,12,7
Locus_2_Transcript_810/4817_Confidence_1.000_Length_328	230	.	T	G	99	PASS	DP=31;VDB=0.184558;SGB=-1.162;RPB=0.28117;MQB=0.35782;MQSB=0.422203;BQB=0.177822;MQ0F=0.193548;ICB=0.3;HOB=0.125;AC=3;AN=4;DP4=0,4,7,7;MQ=20	GT:PL:DP:DV:SP:DP4	1/1:116,15,0:5:5:0:0,0,3,2	0/1:47,0,58:13:9:6:0,4,4,5
Locus_2_Transcript_810/4817_Confidence_1.000_Length_328	257	.	G	T	70	PASS	DP=26;VDB=0.136193;SGB=-3.79618;RPB=0.94769;MQB=0.0219962;MQSB=0.0408696;BQB=0.24146;MQ0F=0.230769;ICB=0.3;HOB=0.125;AC=3;AN=4;DP4=6,6,0,6;MQ=22	GT:PL:DP:DV:SP:DP4	1/1:87,5,0:4:3:0:0,1,0,3	0/1:46,0,96:14:3:7:6,5,0,3
Locus_2_Transcript_813/4817_Confidence_1.000_Length_266	135	.	A	G	116	PASS	DP=35;VDB=0.195528;SGB=-1.30981;RPB=0.952056;MQB=0.119833;MQSB=0.562066;BQB=0.534368;MQ0F=0.2;ICB=0.3;HOB=0.125;AC=3;AN=4;DP4=3,1,13,4;MQ=18	GT:PL:DP:DV:SP:DP4	1/1:118,27,0:9:9:0:0,0,7,2	0/1:62,0,84:12:8:0:3,1,6,2
Locus_2_Transcript_814/4817_Confidence_1.000_Length_297	182	.	A	C	86	PASS	DP=66;VDB=0.52772;SGB=-1.36297;RPB=1;MQB=1;MQSB=0.998226;BQB=1;MQ0F=0.257576;AC=4;AN=4;DP4=1,0,25,13;MQ=7	GT:PL:DP:DV:SP:DP4	1/1:47,45,0:15:15:0:0,0,13,2	1/1:94,48,0:24:23:0:1,0,12,11
Locus_2_Transcript_816/4817_Confidence_1.000_Length_1559	1028	.	G	A	70	PASS	DP=47;VDB=0.378858;SGB=-5.9492;RPB=0.343679;MQB=0.00209133;MQSB=0.753993;BQB=0.71418;MQ0F=0.0425532;ICB=0.5;HOB=0.5;AC=2;AN=4;DP4=9,4,10,3;MQ=35	GT:PL:DP:DV:SP:DP4	0/1:22,0,107:6:1:0:3,2,1,0	0/1:112,0,166:20:12:0:6,2,9,3
Locus_2_Transcript_816/4817_Confidence_1.000_Length_1559	1180	.	C	T	70	PASS	DP=44;VDB=0.345961;SGB=-7.1777;RPB=0.740233;MQB=0.0127416;MQSB=0.0341011;BQB=0.898747;MQ0F=0;ICB=0.3;HOB=0.125;AC=1;AN=4;DP4=9,9,10,7;MQ=27	GT:PL:DP:DV:SP:DP4	0/0:0,12,156:7:1:0:3,3,1,0	0/1:134,0,200:28:16:0:6,6,9,7
Locus_2_Transcript_816/4817_Confidence_1.000_Length_1559	1223	.	G	C	128	PASS	DP=35;VDB=0.468954;SGB=-7.7918;RPB=0.258001;MQB=0.130587;MQSB=0.518176;BQB=0.697047;MQ0F=0;ICB=0.5;HOB=0.5;AC=2;AN=4;DP4=3,5,9,10;MQ=27	GT:PL:DP:DV:SP:DP4	0/1:70,0,2:4:3:0:0,1,1,2	0/1:121,0,135:23:16:0:3,4,8,8
Locus_2_Transcript_816/4817_Confidence_1.000_Length_1559	1332	.	T	C	167	PASS	DP=21;VDB=0.242177;SGB=-0.561957;RPB=0.444564;MQB=0.346864;MQSB=0.759945;BQB=0.697471;MQ0F=0;ICB=0.3;HOB=0.125;AC=3;AN=4;DP4=2,2,5,7;MQ=32	GT:PL:DP:DV:SP:DP4	1/1:56,6,0:2:2:0:0,0,2,0	0/1:175,0,90:14:10:2:2,2,3,7
Locus_2_Transcript_816/4817_Confidence_1.000_Length_1559	1348	.	C	A	63	PASS	DP=25;VDB=0.438189;SGB=-3.78882;RPB=0.940317;MQB=0.214711;MQSB=0.562066;BQB=0.574735;MQ0F=0;ICB=0.5;HOB=0.5;AC=2;AN=4;DP4=7,6,4,2;MQ=32	GT:PL:DP:DV:SP:DP4	0/1:31,0,17:2:1:0:1,0,1,0	0/1:95,0,188:17:5:0:6,6,3,2
Locus_2_Transcript_816/4817_Confidence_1.000_Length_1559	1427	.	A	G	116	PASS	DP=41;VDB=0.14083;SGB=-5.64336;RPB=0.55517;MQB=0.177389;MQSB=0.830264;BQB=0.984436;MQ0F=0;ICB=0.5;HOB=0.5;AC=2;AN=4;DP4=12,5,9,3;MQ=31	GT:PL:DP:DV:SP:DP4	0/1:30,0,114:12:3:0:9,0,2,1	0/1:150,0,190:17:9:8:3,5,7,2
Locus_2_Transcript_816/4817_Confidence_1.000_Length_1559	1518	.	C	T	67	PASS	DP=25;VDB=0.00610857;SGB=-4.40924;RPB=0.171973;MQB=0.998843;MQSB=0.928603;BQB=0.959189;MQ0F=0;ICB=0.5;HOB=0.5;AC=2;AN=4;DP4=3,6,5,3;MQ=29	GT:PL:DP:DV:SP:DP4	0/1:112,0,65:11:7:6:1,3,5,2	0/1:19,0,128:6:1:0:2,3,0,1
Locus_2_Transcript_816/4817_Confidence_1.000_Length_1559	1547	.	T	C	66	PASS	DP=11;VDB=0.00677045;SGB=-0.950356;MQ0F=0;AC=4;AN=4;DP4=0,0,0,5;MQ=30	GT:PL:DP:DV:SP:DP4	1/1:57,9,0:3:3:0:0,0,0,3	1/1:64,6,0:2:2:0:0,0,0,2
Locus_2_Transcript_817/4817_Confidence_1.000_Length_873	170	.	G	C	95	PASS	DP=28;VDB=0.286826;SGB=-4.71804;RPB=0.769203;MQB=0.416862;MQSB=0.759177;BQB=0.907354;MQ0F=0;ICB=0.3;HOB=0.125;AC=1;AN=4;DP4=10,4,5,4;MQ=35	GT:PL:DP:DV:SP:DP4	0/0:0,4,130:6:1:0:2,3,0,1	0/1:158,0,155:17:8:5:8,1,5,3
Locus_2_Transcript_817/4817_Confidence_1.000_Length_873	310	.	A	G	200	PASS	DP=23;VDB=0.657675;SGB=0.169613;RPB=1;MQB=1;MQSB=0.508203;BQB=1;MQ0F=0;AC=4;AN=4;DP4=1,0,9,5;MQ=34	GT:PL:DP:DV:SP:DP4	1/1:22,3,0:1:1:0:0,0,1,0	1/1:233,3,0:14:13:0:1,0,8,5
Locus_2_Transcript_817/4817_Confidence_1.000_Length_873	424	.	G	A	157	PASS	DP=43;VDB=0.855313;SGB=-6.25703;RPB=0.579474;MQB=0.0497063;MQSB=0.362268;BQB=0.995501;MQ0F=0;ICB=0.5;HOB=0.5;AC=2;AN=4;DP4=16,2,7,7;MQ=36	GT:PL:DP:DV:SP:DP4	0/1:11,0,92:5:2:0:3,0,2,0	0/1:210,0,221:27:12:14:13,2,5,7
Locus_2_Transcript_817/4817_Confidence_1.000_Length_873	425	.	A	G	161	PASS	DP=41;VDB=0.854183;SGB=-6.25703;RPB=0.225797;MQB=0.0231949;MQSB=0.157456;BQB=0.70778;MQ0F=0;ICB=0.5;HOB=0.5;AC=2;AN=4;DP4=15,1,7,7;MQ=37	GT:PL:DP:DV:SP:DP4	0/1:11,0,92:5:2:0:3,0,2,0	0/1:214,0,190:25:12:20:12,1,5,7
Locus_2_Transcript_817/4817_Confidence_1.000_Length_873	444	.	G	A	113	PASS	DP=40;VDB=0.0532469;SGB=5.38303;RPB=0.58512;MQB=0.356243;MQSB=0.0380795;BQB=0.546855;MQ0F=0;ICB=0.3;HOB=0.125;AC=1;AN=4;DP4=17,4,4,6;MQ=37	GT:PL:DP:DV:SP:DP4	0/0:0,18,153:6:0:0:4,2,0,0	0/1:177,0,222:25:10:16:13,2,4,6
Locus_2_Transcript_817/4817_Confidence_1.000_Length_873	689	.	C	T	116	PASS	DP=31;VDB=0.0283637;SGB=-6.25703;RPB=0.694935;MQB=0.0488679;MQSB=0.686045;BQB=0.450604;MQ0F=0.193548;ICB=0.5;HOB=0.5;AC=2;AN=4;DP4=6,2,7,7;MQ=29	GT:PL:DP:DV:SP:DP4	0/1:55,0,33:3:2:0:1,0,1,1	0/1:124,0,165:19:12:2:5,2,6,6
Locus_2_Transcript_819/4817_Confidence_1.000_Length_381	162	.	A	T	72	PASS	DP=22;VDB=0.85857;SGB=4.00342;RPB=0.513103;MQB=0.702619;MQSB=0.441869;BQB=0.184727;MQ0F=0.0454545;ICB=0.3;HOB=0.125;AC=1;AN=4;DP4=7,1,6,2;MQ=34	GT:PL:DP:DV:SP:DP4	0/1:136,0,63:11:8:0:3,0,6,2	0/0:0,15,147:5:0:0:4,1,0,0
Locus_2_Transcript_822/4817_Confidence_1.000_Length_332	75	.	T	C	62	PASS	DP=37;VDB=0.581149;SGB=-4.72062;RPB=0.540806;MQB=0.316872;BQB=0.0855391;MQ0F=0.108108;ICB=0.5;HOB=0.5;AC=2;AN=4;DP4=21,0,9,0;MQ=29	GT:PL:DP:DV:SP:DP4	0/1:37,0,99:10:2:0:8,0,2,0	0/1:90,0,136:20:7:0:13,0,7,0
Locus_2_Transcript_822/4817_Confidence_1.000_Length_332	156	.	G	A	285	PASS	DP=57;VDB=0.190166;SGB=-9.32613;RPB=0.999583;MQB=0.77073;MQSB=0.0260001;BQB=0.786628;MQ0F=0.0350877;ICB=0.5;HOB=0.5;AC=2;AN=4;DP4=10,5,19,5;MQ=30	GT:PL:DP:DV:SP:DP4	0/1:155,0,43:12:8:6:2,2,7,1	0/1:194,0,193:27:16:0:8,3,12,4
Locus_2_Transcript_822/4817_Confidence_1.000_Length_332	237	.	A	G	67	PASS	DP=38;VDB=0.791433;SGB=-4.41425;RPB=0.986619;MQB=0.629927;MQSB=0.961184;BQB=0.885819;MQ0F=0;ICB=0.5;HOB=0.5;AC=2;AN=4;DP4=5,17,3,5;MQ=36	GT:PL:DP:DV:SP:DP4	0/1:80,0,77:6:3:4:0,3,2,1	0/1:51,0,255:24:5:0:5,14,1,4
Locus_2_Transcript_826/4817_Confidence_1.000_Length_440	62	.	T	G	109	PASS	DP=20;VDB=0.00123166;SGB=-5.33677;RPB=0.427987;MQB=0.960687;BQB=0.697005;MQ0F=0;ICB=0.3;HOB=0.125;AC=3;AN=4;DP4=5,0,11,0;MQ=27	GT:PL:DP:DV:SP:DP4	1/1:133,18,0:6:6:0:0,0,6,0	0/1:40,0,70:10:5:0:5,0,5,0
Locus_2_Transcript_826/4817_Confidence_1.000_Length_440	186	.	C	T	308	PASS	DP=62;VDB=0.0680364;SGB=-1.35473;RPB=0.212029;MQB=0.924811;MQSB=0.0160128;BQB=0.838725;MQ0F=0.016129;ICB=0.3;HOB=0.125;AC=3;AN=4;DP4=5,1,31,5;MQ=27	GT:PL:DP:DV:SP:DP4	1/1:244,19,0:15:14:0:1,0,9,5	0/1:129,0,49:27:22:0:4,1,22,0
Locus_2_Transcript_826/4817_Confidence_1.000_Length_440	298	.	C	T	78	PASS	DP=39;VDB=0.834076;SGB=-6.25646;RPB=0.990396;MQB=0.884179;MQSB=0.0288494;BQB=0.909077;MQ0F=0;ICB=0.3;HOB=0.125;AC=3;AN=4;DP4=6,11,5,9;MQ=20	GT:PL:DP:DV:SP:DP4	1/1:26,3,0:1:1:0:0,0,0,1	0/1:115,0,144:30:13:0:6,11,5,8
Locus_2_Transcript_827/4817_Confidence_1.000_Length_242	108	.	C	G	63	PASS	DP=30;VDB=0.113645;SGB=-5.0263;RPB=0.221821;MQB=0.686279;BQB=0.836992;MQ0F=0;ICB=0.3;HOB=0.125;AC=1;AN=4;DP4=6,0,10,0;MQ=23	GT:PL:DP:DV:SP:DP4	0/0:0,3,9:3:1:0:2,0,1,0	0/1:126,0,46:13:9:0:4,0,9,0
Locus_2_Transcript_828/4817_Confidence_1.000_Length_386	108	.	G	A	88	PASS	DP=62;VDB=0.0221193;SGB=-1.29643;RPB=0.961957;MQB=0.0111294;MQSB=0.907918;BQB=0.51211;MQ0F=0.0967742;ICB=0.3;HOB=0.125;AC=3;AN=4;DP4=4,0,35,3;MQ=15	GT:PL:DP:DV:SP:DP4	1/1:97,39,0:13:13:0:0,0,12,1	0/1:56,0,23:29:25:0:4,0,23,2
Locus_2_Transcript_828/4817_Confidence_1.000_Length_386	216	.	A	C	106	PASS	DP=66;VDB=0.221221;SGB=-10.2467;RPB=0.798993;MQB=0.0553194;MQSB=0.903037;BQB=0.991313;MQ0F=0;ICB=0.5;HOB=0.5;AC=2;AN=4;DP4=22,2,22,5;MQ=26	GT:PL:DP:DV:SP:DP4	0/1:70,0,99:16:6:0:10,0,6,0	0/1:100,0,172:35:21:2:12,2,16,5
Locus_2_Transcript_828/4817_Confidence_1.000_Length_386	276	.	A	G	354	PASS	DP=92;VDB=0.168164;SGB=-13.6221;RPB=0.717661;MQB=0.204864;MQSB=0.00210687;BQB=0.490593;MQ0F=0;ICB=0.5;HOB=0.5;AC=2;AN=4;DP4=9,7,28,10;MQ=28	GT:PL:DP:DV:SP:DP4	0/1:164,0,82:18:13:6:5,0,9,4	0/1:255,0,93:36:25:12:4,7,19,6
Locus_2_Transcript_828/4817_Confidence_1.000_Length_386	302	.	G	A	86	PASS	DP=73;VDB=0.165106;SGB=5.38303;RPB=0.99865;MQB=0.956304;MQSB=0.226826;BQB=0.200198;MQ0F=0;ICB=0.3;HOB=0.125;AC=1;AN=4;DP4=23,14,3,7;MQ=30	GT:PL:DP:DV:SP:DP4	0/0:0,54,255:18:0:0:10,8,0,0	0/1:150,0,255:29:10:12:13,6,3,7
Locus_2_Transcript_834/4817_Confidence_1.000_Length_845	658	.	G	C	88	PASS	DP=27;VDB=0.396784;SGB=-5.33419;RPB=0.922371;MQB=0.454235;MQSB=0.851535;BQB=0.454235;MQ0F=0.0740741;ICB=0.3;HOB=0.125;AC=1;AN=4;DP4=5,1,9,2;MQ=29	GT:PL:DP:DV:SP:DP4	0/0:0,10,126:6:1:0:4,1,0,1	0/1:152,0,0:11:10:0:1,0,9,1
Locus_2_Transcript_834/4817_Confidence_1.000_Length_845	668	.	A	C	86	PASS	DP=27;VDB=0.0434933;SGB=-4.71804;RPB=0.48511;MQB=0.352866;MQSB=0.987578;BQB=0.352866;MQ0F=0.0740741;ICB=0.3;HOB=0.125;AC=1;AN=4;DP4=6,2,6,3;MQ=29	GT:PL:DP:DV:SP:DP4	0/0:0,10,105:6:1:0:4,1,0,1	0/1:150,0,44:11:8:0:2,1,6,2
Locus_2_Transcript_834/4817_Confidence_1.000_Length_845	669	.	C	A	86	PASS	DP=27;VDB=0.0434933;SGB=-4.71804;RPB=0.48511;MQB=0.352866;MQSB=0.987578;BQB=0.352866;MQ0F=0.0740741;ICB=0.3;HOB=0.125;AC=1;AN=4;DP4=6,2,6,3;MQ=29	GT:PL:DP:DV:SP:DP4	0/0:0,10,119:6:1:0:4,1,0,1	0/1:150,0,62:11:8:0:2,1,6,2
Locus_2_Transcript_838/4817_Confidence_1.000_Length_365	96	.	G	A	74	PASS	DP=23;VDB=0.0359691;SGB=-4.71804;RPB=0.0474376;MQB=0.247381;BQB=0.455794;MQ0F=0;ICB=0.3;HOB=0.125;AC=3;AN=4;DP4=11,0,9,0;MQ=34	GT:PL:DP:DV:SP:DP4	1/1:37,3,0:1:1:0:0,0,1,0	0/1:100,0,146:19:8:0:11,0,8,0
Locus_2_Transcript_842/4817_Confidence_1.000_Length_359	58	.	T	A	131	PASS	DP=105;VDB=2.67175e-05;SGB=-8.40556;RPB=0.434383;MQB=0.747892;BQB=0.982301;MQ0F=0.0571429;ICB=0.5;HOB=0.5;AC=2;AN=4;DP4=50,0,21,0;MQ=28	GT:PL:DP:DV:SP:DP4	0/1:87,0,131:25:6:0:19,0,6,0	0/1:109,0,149:46:15:0:31,0,15,0
Locus_2_Transcript_842/4817_Confidence_1.000_Length_359	131	.	G	A	267	PASS	DP=160;VDB=0.97027;SGB=-13.0084;RPB=0.924967;MQB=0.592923;MQSB=2.36554e-06;BQB=0.860649;MQ0F=0;ICB=0.5;HOB=0.5;AC=2;AN=4;DP4=58,16,29,7;MQ=36	GT:PL:DP:DV:SP:DP4	0/1:245,0,217:48:25:5:22,1,21,4	0/1:86,0,255:62:11:0:36,15,8,3
Locus_2_Transcript_842/4817_Confidence_1.000_Length_359	141	.	G	T	291	PASS	DP=163;VDB=0.951758;SGB=-13.9289;RPB=0.104494;MQB=0.986496;MQSB=9.19363e-06;BQB=0.999329;MQ0F=0;ICB=0.5;HOB=0.5;AC=2;AN=4;DP4=52,21,30,9;MQ=36	GT:PL:DP:DV:SP:DP4	0/1:255,0,217:52:28:8:22,2,21,7	0/1:100,0,255:60:11:5:30,19,9,2
Locus_2_Transcript_842/4817_Confidence_1.000_Length_359	212	.	G	T	171	PASS	DP=146;VDB=0.00162363;SGB=-7.79186;RPB=0.157555;MQB=0.0383101;MQSB=0.713561;BQB=0.995877;MQ0F=0;ICB=0.5;HOB=0.5;AC=2;AN=4;DP4=45,33,11,8;MQ=39	GT:PL:DP:DV:SP:DP4	0/1:89,0,255:48:9:5:22,17,7,2	0/1:150,0,255:49:10:5:23,16,4,6
Locus_2_Transcript_842/4817_Confidence_1.000_Length_359	222	.	A	G	443	PASS	DP=145;VDB=8.36109e-07;SGB=-19.4523;RPB=0.204175;MQB=0.496641;MQSB=0.615782;BQB=0.737218;MQ0F=0;ICB=0.5;HOB=0.5;AC=2;AN=4;DP4=20,16,35,22;MQ=39	GT:PL:DP:DV:SP:DP4	0/1:255,0,214:45:31:7:7,7,22,9	0/1:251,0,255:48:26:2:13,9,13,13
Locus_2_Transcript_842/4817_Confidence_1.000_Length_359	247	.	T	C	74	PASS	DP=121;VDB=0.169693;SGB=-6.56442;RPB=0.788347;MQB=0.00284272;MQSB=0.427884;BQB=0.992101;MQ0F=0.00826446;ICB=0.5;HOB=0.5;AC=2;AN=4;DP4=34,33,7,8;MQ=38	GT:PL:DP:DV:SP:DP4	0/1:125,0,255:38:9:3:15,14,6,3	0/1:17,0,255:44:6:7:19,19,1,5
Locus_2_Transcript_843/4817_Confidence_1.000_Length_624	257	.	G	A	191	PASS	DP=136;VDB=0.240433;SGB=13.6932;RPB=0.209387;MQB=0.996335;MQSB=0.971963;BQB=0.835348;MQ0F=0;ICB=0.3;HOB=0.125;AC=1;AN=4;DP4=53,31,18,4;MQ=41	GT:PL:DP:DV:SP:DP4	0/1:255,0,255:45:22:5:15,8,18,4	0/0:0,184,255:61:0:0:38,23,0,0
Locus_2_Transcript_843/4817_Confidence_1.000_Length_624	422	.	C	T	178	PASS	DP=166;VDB=0.969654;SGB=13.6932;RPB=0.252862;MQB=0.98213;MQSB=0.672346;BQB=0.958366;MQ0F=0;ICB=0.3;HOB=0.125;AC=1;AN=4;DP4=68,30,18,4;MQ=40	GT:PL:DP:DV:SP:DP4	0/1:242,0,255:60:22:3:28,10,18,4	0/0:0,181,255:60:0:0:40,20,0,0
Locus_2_Transcript_844/4817_Confidence_1.000_Length_418	52	.	A	G	237	PASS	DP=100;VDB=0.000104827;SGB=-11.7809;RPB=0.946567;MQB=0.729449;BQB=0.999945;MQ0F=0;ICB=0.5;HOB=0.5;AC=2;AN=4;DP4=44,0,32,0;MQ=40	GT:PL:DP:DV:SP:DP4	0/1:137,0,180:39:12:0:27,0,12,0	0/1:164,0,173:37:20:0:17,0,20,0
Locus_2_Transcript_844/4817_Confidence_1.000_Length_418	71	.	C	G	86	PASS	DP=147;VDB=0.000602126;SGB=-8.71232;RPB=0.991656;MQB=0.408056;BQB=0.0733592;MQ0F=0;ICB=0.3;HOB=0.125;AC=1;AN=4;DP4=89,0,22,0;MQ=40	GT:PL:DP:DV:SP:DP4	0/0:0,160,236:54:1:0:53,0,1,0	0/1:150,0,183:57:21:0:36,0,21,0
Locus_2_Transcript_844/4817_Confidence_1.000_Length_418	322	.	G	A	424	PASS	DP=277;VDB=0.000110045;SGB=-20.066;RPB=0.109104;MQB=0.0003977;MQSB=0.136951;BQB=0.97252;MQ0F=0;ICB=0.5;HOB=0.5;AC=2;AN=4;DP4=63,59,33,26;MQ=39	GT:PL:DP:DV:SP:DP4	0/1:255,0,255:81:31:4:30,20,15,16	0/1:234,0,255:100:28:9:33,39,18,10
Locus_2_Transcript_844/4817_Confidence_1.000_Length_418	333	.	G	A	446	PASS	DP=252;VDB=2.58192e-08;SGB=-32.6469;RPB=0.0300052;MQB=0.0286626;MQSB=0.0464875;BQB=0.999947;MQ0F=0;ICB=0.5;HOB=0.5;AC=2;AN=4;DP4=28,34,52,48;MQ=39	GT:PL:DP:DV:SP:DP4	0/1:255,0,255:75:25:5:25,25,9,16	0/1:255,0,61:87:75:12:3,9,43,32
Locus_2_Transcript_844/4817_Confidence_1.000_Length_418	336	.	C	T	395	PASS	DP=236;VDB=1.53835e-06;SGB=-17.3043;RPB=0.370795;MQB=5.45918e-05;MQSB=0.0268641;BQB=0.516576;MQ0F=0;ICB=0.5;HOB=0.5;AC=2;AN=4;DP4=50,62,23,27;MQ=39	GT:PL:DP:DV:SP:DP4	0/1:255,0,255:75:25:5:23,27,8,17	0/1:205,0,255:87:25:6:27,35,15,10
Locus_2_Transcript_844/4817_Confidence_1.000_Length_418	349	.	G	A	179	PASS	DP=211;VDB=0.000144682;SGB=15.7726;RPB=0.55682;MQB=0.315309;MQSB=0.287778;BQB=0.234578;MQ0F=0;ICB=0.3;HOB=0.125;AC=1;AN=4;DP4=50,81,5,20;MQ=39	GT:PL:DP:DV:SP:DP4	0/1:243,0,255:72:25:14:21,26,5,20	0/0:0,253,255:84:0:0:29,55,0,0
Locus_2_Transcript_845/4817_Confidence_1.000_Length_257	12	.	T	C	154	PASS	DP=53;VDB=2.06627e-10;SGB=-8.40557;RPB=0.617844;MQB=0.505079;BQB=0.0837025;MQ0F=0.0377358;ICB=0.5;HOB=0.5;AC=2;AN=4;DP4=25,0,21,0;MQ=29	GT:PL:DP:DV:SP:DP4	0/1:97,0,145:22:9:0:13,0,9,0	0/1:121,0,118:24:12:0:12,0,12,0
Locus_2_Transcript_845/4817_Confidence_1.000_Length_257	132	.	G	C	198	PASS	DP=194;VDB=0.315495;SGB=-9.63298;RPB=0.894192;MQB=0.984609;MQSB=1.51072e-06;BQB=0.357083;MQ0F=0.00515464;ICB=0.5;HOB=0.5;AC=2;AN=4;DP4=72,22,17,8;MQ=35	GT:PL:DP:DV:SP:DP4	0/1:148,0,255:64:14:10:40,10,8,6	0/1:117,0,255:55:11:1:32,12,9,2
Locus_2_Transcript_845/4817_Confidence_1.000_Length_257	156	.	G	A	237	PASS	DP=180;VDB=0.152658;SGB=-9.01927;RPB=0.139557;MQB=0.983916;MQSB=0.391809;BQB=0.983916;MQ0F=0.0111111;ICB=0.5;HOB=0.5;AC=2;AN=4;DP4=54,33,14,9;MQ=35	GT:PL:DP:DV:SP:DP4	0/1:139,0,255:60:12:0:30,18,8,4	0/1:165,0,255:50:11:1:24,15,6,5
Locus_2_Transcript_845/4817_Confidence_1.000_Length_257	210	.	C	A	418	PASS	DP=105;VDB=1.81409e-09;SGB=-12.3947;RPB=0.852818;MQB=0.623275;MQSB=0.0159097;BQB=0.993876;MQ0F=0.0190476;ICB=0.5;HOB=0.5;AC=2;AN=4;DP4=15,29,11,23;MQ=35	GT:PL:DP:DV:SP:DP4	0/1:255,0,255:40:17:5:5,18,7,10	0/1:226,0,255:38:17:7:10,11,4,13
Locus_2_Transcript_847/4817_Confidence_1.000_Length_392	12	.	T	G	87	PASS	DP=74;VDB=5.95176e-09;SGB=-7.79185;RPB=0.541555;MQB=0.873925;BQB=0.343304;MQ0F=0;ICB=0.5;HOB=0.5;AC=2;AN=4;DP4=37,0,19,0;MQ=26	GT:PL:DP:DV:SP:DP4	0/1:53,0,139:17:6:0:11,0,6,0	0/1:99,0,132:39:13:0:26,0,13,0
Locus_2_Transcript_847/4817_Confidence_1.000_Length_392	13	.	T	G	189	PASS	DP=74;VDB=1.23226e-15;SGB=-12.7015;RPB=0.0021622;MQB=0.163235;BQB=0.957088;MQ0F=0;ICB=0.5;HOB=0.5;AC=2;AN=4;DP4=21,0,35,0;MQ=26	GT:PL:DP:DV:SP:DP4	0/1:119,0,81:17:12:0:5,0,12,0	0/1:134,0,118:39:23:0:16,0,23,0
Locus_2_Transcript_847/4817_Confidence_1.000_Length_392	17	.	A	G	189	PASS	DP=89;VDB=1.32367e-19;SGB=-15.1563;RPB=0.00422687;MQB=0.0754215;BQB=0.782646;MQ0F=0;ICB=0.5;HOB=0.5;AC=2;AN=4;DP4=22,0,43,0;MQ=25	GT:PL:DP:DV:SP:DP4	0/1:112,0,71:21:16:0:5,0,16,0	0/1:141,0,124:44:27:0:17,0,27,0
Locus_2_Transcript_847/4817_Confidence_1.000_Length_392	36	.	C	A	126	PASS	DP=122;VDB=1.05112e-06;SGB=-9.63298;RPB=0.118952;MQB=0.940016;BQB=0.813504;MQ0F=0;ICB=0.5;HOB=0.5;AC=2;AN=4;DP4=62,0,25,0;MQ=29	GT:PL:DP:DV:SP:DP4	0/1:91,0,147:29:8:0:21,0,8,0	0/1:100,0,160:58:17:0:41,0,17,0
Locus_2_Transcript_847/4817_Confidence_1.000_Length_392	73	.	A	G	256	PASS	DP=177;VDB=0.000508253;SGB=-28.6579;RPB=0.152325;MQB=0.883599;BQB=0.908084;MQ0F=0;ICB=0.5;HOB=0.5;AC=2;AN=4;DP4=36,0,87,0;MQ=31	GT:PL:DP:DV:SP:DP4	0/1:157,0,103:47:35:0:12,0,35,0	0/1:164,0,129:76:52:0:24,0,52,0
Locus_2_Transcript_847/4817_Confidence_1.000_Length_392	98	.	A	G	209	PASS	DP=227;VDB=0.723307;SGB=-19.7591;RPB=0.504639;MQB=0.804296;BQB=0.365073;MQ0F=0;ICB=0.5;HOB=0.5;AC=2;AN=4;DP4=95,0,58,0;MQ=33	GT:PL:DP:DV:SP:DP4	0/1:162,0,181:68:33:0:35,0,33,0	0/1:111,0,166:85:25:0:60,0,25,0
Locus_2_Transcript_847/4817_Confidence_1.000_Length_392	146	.	T	C	218	PASS	DP=258;VDB=0.501676;SGB=-18.8386;RPB=0.99823;MQB=0.923585;MQSB=3.63836e-09;BQB=0.865002;MQ0F=0;ICB=0.5;HOB=0.5;AC=2;AN=4;DP4=120,23,50,5;MQ=38	GT:PL:DP:DV:SP:DP4	0/1:219,0,255:87:36:0:48,3,34,2	0/1:64,0,255:111:19:1:72,20,16,3
Locus_2_Transcript_847/4817_Confidence_1.000_Length_392	159	.	C	A	446	PASS	DP=273;VDB=0.540603;SGB=-37.8634;RPB=0.914729;MQB=0.928022;MQSB=2.47154e-06;BQB=0.836162;MQ0F=0;ICB=0.5;HOB=0.5;AC=2;AN=4;DP4=75,13,98,19;MQ=39	GT:PL:DP:DV:SP:DP4	0/1:255,0,154:95:68:1:25,2,60,8	0/1:255,0,255:110:49:2:50,11,38,11
Locus_2_Transcript_847/4817_Confidence_1.000_Length_392	162	.	G	A	263	PASS	DP=278;VDB=0.582678;SGB=-19.1454;RPB=0.798917;MQB=0.761835;MQSB=8.15476e-08;BQB=0.435438;MQ0F=0;ICB=0.5;HOB=0.5;AC=2;AN=4;DP4=126,26,48,8;MQ=39	GT:PL:DP:DV:SP:DP4	0/1:199,0,255:96:28:0:60,8,25,3	0/1:130,0,255:112:28:1:66,18,23,5
Locus_2_Transcript_847/4817_Confidence_1.000_Length_392	341	.	G	T	319	PASS	DP=217;VDB=9.62559e-19;SGB=-17.918;RPB=0.859813;MQB=0.296323;MQSB=0.683012;BQB=0.429403;MQ0F=0;ICB=0.5;HOB=0.5;AC=2;AN=4;DP4=33,91,8,44;MQ=40	GT:PL:DP:DV:SP:DP4	0/1:255,0,255:92:30:3:20,42,7,23	0/1:129,0,255:84:22:10:13,49,1,21
Locus_2_Transcript_848/4817_Confidence_1.000_Length_298	35	.	T	C	83	PASS	DP=22;VDB=1.81094e-08;SGB=-1.28266;RPB=0.568893;MQB=0.0422537;BQB=0.268726;MQ0F=0.136364;ICB=0.5;HOB=0.5;AC=2;AN=4;DP4=3,0,16,0;MQ=22	GT:PL:DP:DV:SP:DP4	0/1:65,0,45:11:9:0:2,0,9,0	0/1:83,0,13:8:7:0:1,0,7,0
Locus_2_Transcript_848/4817_Confidence_1.000_Length_298	69	.	T	A	203	PASS	DP=52;VDB=1.46185e-05;SGB=-1.38131;RPB=0.746758;MQB=0.191451;BQB=0.464398;MQ0F=0.115385;ICB=0.3;HOB=0.125;AC=3;AN=4;DP4=3,0,36,0;MQ=27	GT:PL:DP:DV:SP:DP4	0/1:112,0,21:19:17:0:2,0,17,0	1/1:156,23,0:20:19:0:1,0,19,0
Locus_2_Transcript_848/4817_Confidence_1.000_Length_298	126	.	A	G	417	PASS	DP=252;VDB=4.58021e-13;SGB=-1.38629;RPB=0.0638261;MQB=0.357864;MQSB=0.946615;BQB=0.99412;MQ0F=0.0238095;AC=4;AN=4;DP4=2,2,155,2;MQ=36	GT:PL:DP:DV:SP:DP4	1/1:217,132,0:81:78:26:1,2,77,1	1/1:255,199,0:80:79:0:1,0,78,1
Locus_2_Transcript_848/4817_Confidence_1.000_Length_298	141	.	T	C	268	PASS	DP=307;VDB=0.000149032;SGB=-23.4414;RPB=0.808658;MQB=1.08352e-10;MQSB=0.000320294;BQB=0.773729;MQ0F=0.0130293;ICB=0.5;HOB=0.5;AC=2;AN=4;DP4=128,7,61,9;MQ=37	GT:PL:DP:DV:SP:DP4	0/1:155,0,255:110:41:5:64,5,35,6	0/1:178,0,237:95:29:8:64,2,26,3
Locus_2_Transcript_848/4817_Confidence_1.000_Length_298	178	.	T	G	326	PASS	DP=378;VDB=0.000419668;SGB=-24.0551;RPB=0.819689;MQB=1.70383e-16;MQSB=0.0350538;BQB=0.999739;MQ0F=0.010582;ICB=0.5;HOB=0.5;AC=2;AN=4;DP4=124,13,60,12;MQ=37	GT:PL:DP:DV:SP:DP4	0/1:187,0,255:112:44:10:64,4,37,7	0/1:204,0,255:97:28:3:60,9,23,5
Locus_2_Transcript_848/4817_Confidence_1.000_Length_298	180	.	C	A	62	PASS	DP=377;VDB=0.0440835;SGB=-11.4741;RPB=0.0196803;MQB=0.00329936;MQSB=0.0860557;BQB=0.764017;MQ0F=0.0106101;ICB=0.3;HOB=0.125;AC=1;AN=4;DP4=153,25,29,2;MQ=37	GT:PL:DP:DV:SP:DP4	0/1:127,0,255:112:26:5:75,11,25,1	0/0:0,111,255:97:5:2:78,14,4,1
Locus_2_Transcript_848/4817_Confidence_1.000_Length_298	188	.	G	A	317	PASS	DP=386;VDB=0.000399129;SGB=-24.0551;RPB=0.996356;MQB=1.70383e-16;MQSB=0.17479;BQB=0.912781;MQ0F=0.0103627;ICB=0.5;HOB=0.5;AC=2;AN=4;DP4=120,17,60,12;MQ=37	GT:PL:DP:DV:SP:DP4	0/1:178,0,255:112:44:7:63,5,37,7	0/1:204,0,255:97:28:0:57,12,23,5
Locus_2_Transcript_848/4817_Confidence_1.000_Length_298	242	.	T	A	191	PASS	DP=202;VDB=5.70598e-08;SGB=31.7149;RPB=0.993404;MQB=0.0101614;MQSB=0.26197;BQB=0.125593;MQ0F=0.00990099;ICB=0.3;HOB=0.125;AC=1;AN=4;DP4=36,53,26,22;MQ=38	GT:PL:DP:DV:SP:DP4	0/1:255,0,255:71:48:2:14,9,26,22	0/0:0,199,255:66:0:0:22,44,0,0
Locus_2_Transcript_848/4817_Confidence_1.000_Length_298	269	.	T	G	247	PASS	DP=108;VDB=1.17106e-08;SGB=-9.93983;RPB=0.989646;MQB=0.165648;MQSB=0.983432;BQB=0.868148;MQ0F=0.00925926;ICB=0.5;HOB=0.5;AC=2;AN=4;DP4=8,62,4,22;MQ=37	GT:PL:DP:DV:SP:DP4	0/1:142,0,255:52:12:0:6,34,2,10	0/1:170,0,205:44:14:2:2,28,2,12
Locus_2_Transcript_848/4817_Confidence_1.000_Length_298	281	.	T	G	263	PASS	DP=66;VDB=3.32538e-09;SGB=-9.93983;RPB=0.989029;MQB=0.69555;MQSB=0.977191;BQB=0.842076;MQ0F=0.0151515;ICB=0.5;HOB=0.5;AC=2;AN=4;DP4=3,29,4,22;MQ=34	GT:PL:DP:DV:SP:DP4	0/1:130,0,242:28:8:2:3,17,2,6	0/1:196,0,109:30:18:3:0,12,2,16
Locus_2_Transcript_849/4817_Confidence_1.000_Length_406	303	.	C	G	83	PASS	DP=32;VDB=0.15874;SGB=-5.02916;RPB=0.772706;MQB=0.318907;MQSB=0.697593;BQB=1;MQ0F=0.03125;ICB=0.5;HOB=0.5;AC=2;AN=4;DP4=6,4,6,4;MQ=29	GT:PL:DP:DV:SP:DP4	0/1:36,0,2:5:3:4:2,0,1,2	0/1:109,0,185:15:7:2:4,4,5,2
Locus_2_Transcript_849/4817_Confidence_1.000_Length_406	304	.	C	T	105	PASS	DP=32;VDB=0.0641964;SGB=-5.3363;RPB=0.727471;MQB=0.247381;MQSB=0.697593;BQB=0.81179;MQ0F=0.03125;ICB=0.5;HOB=0.5;AC=2;AN=4;DP4=6,3,6,5;MQ=29	GT:PL:DP:DV:SP:DP4	0/1:36,0,2:5:3:4:2,0,1,2	0/1:131,0,183:15:8:0:4,3,5,3
Locus_2_Transcript_853/4817_Confidence_1.000_Length_597	88	.	C	G	126	PASS	DP=114;VDB=0.581467;SGB=-7.17814;RPB=0.997506;MQB=0.994053;BQB=0.810141;MQ0F=0;ICB=0.5;HOB=0.5;AC=2;AN=4;DP4=57,0,17,0;MQ=38	GT:PL:DP:DV:SP:DP4	0/1:65,0,165:39:6:0:33,0,6,0	0/1:127,0,186:35:11:0:24,0,11,0
Locus_2_Transcript_853/4817_Confidence_1.000_Length_597	94	.	A	C	89	PASS	DP=131;VDB=0.00770416;SGB=-7.17813;RPB=0.0684784;MQB=0.459599;BQB=0.382659;MQ0F=0;ICB=0.5;HOB=0.5;AC=2;AN=4;DP4=67,0,17,0;MQ=38	GT:PL:DP:DV:SP:DP4	0/1:139,0,185:41:12:0:29,0,12,0	0/1:17,0,149:43:5:0:38,0,5,0
Locus_2_Transcript_853/4817_Confidence_1.000_Length_597	121	.	G	A	134	PASS	DP=127;VDB=0.820706;SGB=-7.48501;RPB=0.385942;MQB=0.988147;MQSB=3.80001e-07;BQB=0.626884;MQ0F=0;ICB=0.5;HOB=0.5;AC=2;AN=4;DP4=60,13,14,4;MQ=39	GT:PL:DP:DV:SP:DP4	0/1:113,0,255:42:9:0:27,6,8,1	0/1:89,0,255:49:9:4:33,7,6,3
Locus_2_Transcript_853/4817_Confidence_1.000_Length_597	207	.	A	G	341	PASS	DP=133;VDB=0.875027;SGB=-11.1672;RPB=0.76912;MQB=0.981708;MQSB=0.608179;BQB=0.76912;MQ0F=0;ICB=0.5;HOB=0.5;AC=2;AN=4;DP4=48,17,22,8;MQ=41	GT:PL:DP:DV:SP:DP4	0/1:151,0,255:34:8:2:19,7,5,3	0/1:255,0,255:61:22:0:29,10,17,5
Locus_2_Transcript_853/4817_Confidence_1.000_Length_597	241	.	G	C	446	PASS	DP=138;VDB=0.190192;SGB=-1.0914;RPB=0.0272131;MQB=0.928782;MQSB=0.968248;BQB=0.698651;MQ0F=0;ICB=0.3;HOB=0.125;AC=3;AN=4;DP4=8,4,50,27;MQ=41	GT:PL:DP:DV:SP:DP4	0/1:255,0,218:34:22:0:8,4,14,8	1/1:255,163,0:55:55:0:0,0,36,19
Locus_2_Transcript_853/4817_Confidence_1.000_Length_597	244	.	A	G	446	PASS	DP=141;VDB=0.248472;SGB=-19.4523;RPB=0.0249457;MQB=0.948081;MQSB=0.960917;BQB=0.327307;MQ0F=0;ICB=0.5;HOB=0.5;AC=2;AN=4;DP4=18,15,40,17;MQ=41	GT:PL:DP:DV:SP:DP4	0/1:255,0,255:34:17:6:9,8,13,4	0/1:255,0,233:56:40:3:9,7,27,13
Locus_2_Transcript_854/4817_Confidence_1.000_Length_488	108	.	A	G	65	PASS	DP=19;VDB=0.49286;SGB=4.00342;RPB=0.646425;MQB=0.594978;MQSB=1;BQB=0.493254;MQ0F=0;ICB=0.3;HOB=0.125;AC=1;AN=4;DP4=4,0,7,1;MQ=35	GT:PL:DP:DV:SP:DP4	0/0:0,9,105:3:0:0:3,0,0,0	0/1:129,0,10:9:8:0:1,0,7,1
Locus_2_Transcript_854/4817_Confidence_1.000_Length_488	180	.	C	A	142	PASS	DP=14;VDB=0.0694872;SGB=-1.05859;RPB=0.829029;MQB=0.829029;MQSB=0.924449;BQB=0.877913;MQ0F=0;ICB=0.3;HOB=0.125;AC=3;AN=4;DP4=3,0,1,7;MQ=38	GT:PL:DP:DV:SP:DP4	1/1:92,9,0:3:3:0:0,0,0,3	0/1:114,0,76:8:5:8:3,0,1,4
Locus_2_Transcript_854/4817_Confidence_1.000_Length_488	199	.	A	G	153	PASS	DP=12;VDB=0.0209517;SGB=-1.05859;RPB=0.9375;MQB=0.875;MQSB=0.916482;BQB=0.9375;MQ0F=0;ICB=0.3;HOB=0.125;AC=3;AN=4;DP4=2,0,1,7;MQ=41	GT:PL:DP:DV:SP:DP4	1/1:92,9,0:3:3:0:0,0,0,3	0/1:126,0,33:7:5:8:2,0,1,4
Locus_2_Transcript_858/4817_Confidence_1.000_Length_1873	673	.	C	A	80	PASS	DP=12;VDB=0.284843;SGB=1.94933;RPB=0.162433;MQB=0.974597;MQSB=1;BQB=0.974597;MQ0F=0;ICB=0.3;HOB=0.125;AC=1;AN=4;DP4=4,0,3,2;MQ=42	GT:PL:DP:DV:SP:DP4	0/0:0,3,37:1:0:0:1,0,0,0	0/1:143,0,76:8:5:3:3,0,3,2
Locus_2_Transcript_858/4817_Confidence_1.000_Length_1873	869	.	A	G	71	PASS	DP=8;VDB=0.610267;SGB=1.41704;RPB=0.8;MQB=1;MQSB=1.01283;BQB=0.4;MQ0F=0;ICB=1;HOB=0.5;AC=1;AN=2;DP4=1,1,2,3;MQ=42	GT:PL:DP:DV:SP:DP4	./.:0,0,0:0:0:0:0,0,0,0	0/1:132,0,58:7:5:0:1,1,2,3
Locus_2_Transcript_858/4817_Confidence_1.000_Length_1873	1074	.	C	T	92	PASS	DP=20;VDB=0.0248912;SGB=2.63044;RPB=0.153355;MQB=0.875173;MQSB=0.960789;BQB=0.0672055;MQ0F=0;ICB=0.3;HOB=0.125;AC=1;AN=4;DP4=7,1,3,3;MQ=41	GT:PL:DP:DV:SP:DP4	0/0:0,6,77:2:0:0:2,0,0,0	0/1:155,0,155:12:6:3:5,1,3,3
Locus_2_Transcript_858/4817_Confidence_1.000_Length_1873	1080	.	C	T	67	PASS	DP=18;VDB=0.0615984;SGB=1.94933;RPB=0.0643861;MQB=0.84246;MQSB=0.953497;BQB=0.187475;MQ0F=0;ICB=0.3;HOB=0.125;AC=1;AN=4;DP4=6,2,3,2;MQ=41	GT:PL:DP:DV:SP:DP4	0/0:0,6,77:2:0:0:2,0,0,0	0/1:131,0,166:11:5:0:4,2,3,2
Locus_2_Transcript_858/4817_Confidence_1.000_Length_1873	1798	.	C	T	65	PASS	DP=26;VDB=0.0269703;SGB=-1.18652;RPB=0.230769;MQB=0.307692;MQSB=0.77274;BQB=0.692308;MQ0F=0.423077;ICB=0.3;HOB=0.125;AC=3;AN=4;DP4=2,0,9,4;MQ=13	GT:PL:DP:DV:SP:DP4	0/1:43,0,24:7:5:0:2,0,5,0	1/1:86,24,0:8:8:0:0,0,4,4
Locus_2_Transcript_859/4817_Confidence_1.000_Length_856	257	.	T	G	84	PASS	DP=55;VDB=0.00124055;SGB=-9.01927;RPB=0.128124;MQB=0.0920496;MQSB=0.931024;BQB=0.767169;MQ0F=0.127273;ICB=0.5;HOB=0.5;AC=2;AN=4;DP4=12,4,22,1;MQ=23	GT:PL:DP:DV:SP:DP4	0/1:71,0,55:9:6:0:3,0,6,0	0/1:76,0,195:30:17:9:9,4,16,1
Locus_2_Transcript_859/4817_Confidence_1.000_Length_856	267	.	A	T	80	PASS	DP=56;VDB=0.00984404;SGB=-10.5535;RPB=0.0835185;MQB=0.000153436;MQSB=0.114176;BQB=0.998259;MQ0F=0.107143;ICB=0.5;HOB=0.5;AC=2;AN=4;DP4=7,5,27,1;MQ=24	GT:PL:DP:DV:SP:DP4	0/1:71,0,55:9:6:0:3,0,6,0	0/1:73,0,173:31:22:24:4,5,21,1
Locus_2_Transcript_859/4817_Confidence_1.000_Length_856	315	.	G	T	116	PASS	DP=65;VDB=0.972702;SGB=-10.2467;RPB=0.993351;MQB=0.839278;MQSB=0.410296;BQB=0.994906;MQ0F=0.123077;ICB=0.5;HOB=0.5;AC=2;AN=4;DP4=10,3,23,4;MQ=21	GT:PL:DP:DV:SP:DP4	0/1:90,0,18:10:7:0:2,1,6,1	0/1:91,0,136:30:20:0:8,2,17,3
Locus_2_Transcript_859/4817_Confidence_1.000_Length_856	328	.	A	G	137	PASS	DP=56;VDB=0.0697857;SGB=-9.63298;RPB=0.569206;MQB=0.0902853;MQSB=0.99668;BQB=0.275204;MQ0F=0.142857;ICB=0.5;HOB=0.5;AC=2;AN=4;DP4=6,9,16,9;MQ=22	GT:PL:DP:DV:SP:DP4	0/1:76,0,53:11:7:0:2,2,3,4	0/1:125,0,151:29:18:9:4,7,13,5
Locus_2_Transcript_859/4817_Confidence_1.000_Length_856	402	.	T	C	129	PASS	DP=38;VDB=0.207888;SGB=0.790216;RPB=0.705826;MQB=0.0140134;MQSB=0.0707043;BQB=0.814831;MQ0F=0.131579;ICB=0.5;HOB=0.5;AC=2;AN=4;DP4=4,1,9,16;MQ=23	GT:PL:DP:DV:SP:DP4	0/1:18,0,25:4:3:0:0,1,2,1	0/1:175,0,54:26:22:17:4,0,7,15
Locus_2_Transcript_859/4817_Confidence_1.000_Length_856	508	.	T	G	70	PASS	DP=20;VDB=0.530437;SGB=1.94933;RPB=0.506703;MQB=0.584657;MQSB=0.8;BQB=0.760054;MQ0F=0;ICB=1;HOB=0.5;AC=1;AN=2;DP4=6,1,4,1;MQ=41	GT:PL:DP:DV:SP:DP4	./.:0,0,0:0:0:0:0,0,0,0	0/1:131,0,173:12:5:0:6,1,4,1
Locus_2_Transcript_859/4817_Confidence_1.000_Length_856	516	.	C	T	69	PASS	DP=20;VDB=0.882013;SGB=1.94933;RPB=0.908075;MQB=0.723173;MQSB=0.748798;BQB=0.461115;MQ0F=0;ICB=1;HOB=0.5;AC=1;AN=2;DP4=7,1,3,2;MQ=41	GT:PL:DP:DV:SP:DP4	./.:0,0,0:0:0:0:0,0,0,0	0/1:130,0,183:13:5:3:7,1,3,2
Locus_2_Transcript_864/4817_Confidence_1.000_Length_204	43	.	G	A	74	PASS	DP=18;VDB=0.000465593;SGB=-5.02958;RPB=1;MQB=0.0720956;BQB=0.887766;MQ0F=0;AC=4;AN=4;DP4=7,0,10,0;MQ=18	GT:PL:DP:DV:SP:DP4	1/1:14,1,0:5:4:0:1,0,4,0	1/1:115,2,0:12:6:0:6,0,6,0
Locus_2_Transcript_866/4817_Confidence_1.000_Length_357	205	.	C	T	176	PASS	DP=16;VDB=0.92455;SGB=-0.885054;RPB=1;MQB=1;MQSB=0.546855;BQB=1;MQ0F=0;ICB=0.3;HOB=0.125;AC=3;AN=4;DP4=1,0,2,10;MQ=34	GT:PL:DP:DV:SP:DP4	1/1:85,9,0:3:3:0:0,0,0,3	0/1:155,0,12:10:9:0:1,0,2,7
Locus_2_Transcript_871/4817_Confidence_1.000_Length_569	153	.	T	C	69	PASS	DP=53;VDB=0.463904;SGB=-8.71242;RPB=0.964451;MQB=0.0188604;MQSB=0.0650623;BQB=0.0257878;MQ0F=0.207547;ICB=0.5;HOB=0.5;AC=2;AN=4;DP4=13,4,22,0;MQ=21	GT:PL:DP:DV:SP:DP4	0/1:51,0,38:12:9:0:2,1,9,0	0/1:81,0,181:27:13:7:11,3,13,0
Locus_2_Transcript_871/4817_Confidence_1.000_Length_569	159	.	T	A	100	PASS	DP=54;VDB=0.236092;SGB=-5.95064;RPB=0.0817435;MQB=0.0693677;MQSB=0.177068;BQB=0.652507;MQ0F=0.203704;ICB=0.5;HOB=0.5;AC=2;AN=4;DP4=25,2,10,3;MQ=22	GT:PL:DP:DV:SP:DP4	0/1:76,0,52:13:5:0:8,0,4,1	0/1:87,0,153:27:8:3:17,2,6,2
Locus_2_Transcript_871/4817_Confidence_1.000_Length_569	213	.	A	C	167	PASS	DP=43;VDB=0.0710944;SGB=-6.87069;RPB=0.917776;MQB=0.00286462;MQSB=0.255757;BQB=0.666648;MQ0F=0.255814;ICB=0.3;HOB=0.125;AC=1;AN=4;DP4=15,2,11,5;MQ=22	GT:PL:DP:DV:SP:DP4	0/0:0,8,58:8:1:0:6,1,0,1	0/1:232,0,59:25:15:2:9,1,11,4
Locus_2_Transcript_871/4817_Confidence_1.000_Length_569	345	.	T	C	99	PASS	DP=36;VDB=0.871209;SGB=-6.56362;RPB=0.695496;MQB=0.824178;MQSB=0.763202;BQB=0.243283;MQ0F=0.138889;ICB=0.5;HOB=0.5;AC=2;AN=4;DP4=9,4,5,10;MQ=23	GT:PL:DP:DV:SP:DP4	0/1:25,0,43:4:1:0:2,1,1,0	0/1:137,0,146:24:14:10:7,3,4,10
Locus_2_Transcript_871/4817_Confidence_1.000_Length_569	371	.	A	C	164	PASS	DP=32;VDB=0.464429;SGB=-7.1781;RPB=0.987474;MQB=0.428458;MQSB=0.757465;BQB=0.283511;MQ0F=0.0625;ICB=0.3;HOB=0.125;AC=3;AN=4;DP4=5,2,10,7;MQ=25	GT:PL:DP:DV:SP:DP4	1/1:78,12,0:4:4:0:0,0,4,0	0/1:150,0,122:20:13:4:5,2,6,7
Locus_2_Transcript_871/4817_Confidence_1.000_Length_569	374	.	A	G	164	PASS	DP=30;VDB=0.459648;SGB=-7.1781;RPB=0.999496;MQB=0.428458;MQSB=0.403791;BQB=0.482841;MQ0F=0.0666667;ICB=0.3;HOB=0.125;AC=3;AN=4;DP4=4,3,10,7;MQ=25	GT:PL:DP:DV:SP:DP4	1/1:78,12,0:4:4:0:0,0,4,0	0/1:150,0,125:20:13:0:4,3,6,7
Locus_2_Transcript_872/4817_Confidence_1.000_Length_314	27	.	C	T	68	PASS	DP=22;VDB=0.000489864;SGB=-6.25731;RPB=0.817858;MQB=0.293091;BQB=0.966484;MQ0F=0.0454545;ICB=0.3;HOB=0.125;AC=3;AN=4;DP4=7,0,14,0;MQ=20	GT:PL:DP:DV:SP:DP4	1/1:72,9,0:3:3:0:0,0,3,0	0/1:60,0,80:18:11:0:7,0,11,0
Locus_2_Transcript_872/4817_Confidence_1.000_Length_314	61	.	A	G	128	PASS	DP=33;VDB=0.00171879;SGB=0.72015;RPB=0.958318;MQB=0.996838;BQB=0.633803;MQ0F=0.030303;ICB=0.3;HOB=0.125;AC=3;AN=4;DP4=7,0,21,0;MQ=24	GT:PL:DP:DV:SP:DP4	1/1:67,6,0:2:2:0:0,0,2,0	0/1:126,0,46:26:19:0:7,0,19,0
Locus_2_Transcript_872/4817_Confidence_1.000_Length_314	94	.	C	T	128	PASS	DP=57;VDB=0.112009;SGB=1.75898;RPB=0.997135;MQB=0.299428;BQB=0.226476;MQ0F=0.0350877;ICB=0.3;HOB=0.125;AC=3;AN=4;DP4=6,0,34,0;MQ=26	GT:PL:DP:DV:SP:DP4	0/1:66,0,60:6:4:0:2,0,4,0	1/1:124,1,0:34:30:0:4,0,30,0
Locus_2_Transcript_872/4817_Confidence_1.000_Length_314	137	.	T	C	253	PASS	DP=66;VDB=0.426921;SGB=2.61964;RPB=0.927307;MQB=0.751111;MQSB=0.330646;BQB=0.751111;MQ0F=0.0151515;ICB=0.3;HOB=0.125;AC=3;AN=4;DP4=5,0,27,8;MQ=27	GT:PL:DP:DV:SP:DP4	0/1:62,0,67:7:3:0:4,0,3,0	1/1:255,52,0:33:32:0:1,0,24,8
Locus_2_Transcript_872/4817_Confidence_1.000_Length_314	167	.	T	A	261	PASS	DP=66;VDB=0.333452;SGB=1.65045;RPB=0.647628;MQB=0.957602;MQSB=0.846236;BQB=0.954079;MQ0F=0.0454545;ICB=0.5;HOB=0.5;AC=2;AN=4;DP4=6,5,17,20;MQ=23	GT:PL:DP:DV:SP:DP4	0/1:71,0,58:8:5:7:3,0,2,3	0/1:255,0,21:40:32:1:3,5,15,17
Locus_2_Transcript_872/4817_Confidence_1.000_Length_314	170	.	G	A	82	PASS	DP=66;VDB=0.894812;SGB=-6.25703;RPB=0.954199;MQB=0.992249;MQSB=0.61693;BQB=0.196743;MQ0F=0.0454545;ICB=0.5;HOB=0.5;AC=2;AN=4;DP4=18,16,4,10;MQ=23	GT:PL:DP:DV:SP:DP4	0/1:45,0,77:8:2:10:5,1,0,2	0/1:101,0,248:40:12:3:13,15,4,8
Locus_2_Transcript_872/4817_Confidence_1.000_Length_314	218	.	C	T	140	PASS	DP=41;VDB=0.00821634;SGB=0.891673;RPB=0.892932;MQB=0.618774;MQSB=0.0476783;BQB=0.635732;MQ0F=0.097561;ICB=0.3;HOB=0.125;AC=3;AN=4;DP4=1,5,6,16;MQ=22	GT:PL:DP:DV:SP:DP4	1/1:23,6,0:2:2:0:0,0,1,1	0/1:179,0,10:26:20:0:1,5,5,15
Locus_2_Transcript_876/4817_Confidence_1.000_Length_346	250	.	A	G	93	PASS	DP=12;VDB=0.377633;SGB=-1.05588;RPB=0.714286;MQB=0.785714;MQSB=0.809011;BQB=0.571429;MQ0F=0.25;ICB=0.3;HOB=0.125;AC=3;AN=4;DP4=0,2,3,4;MQ=28	GT:PL:DP:DV:SP:DP4	1/1:100,12,0:4:4:0:0,0,2,2	0/1:57,0,45:5:3:0:0,2,1,2
Locus_2_Transcript_877/4817_Confidence_1.000_Length_424	61	.	G	A	142	PASS	DP=12;VDB=0.0846903;SGB=-1.03866;MQ0F=0;AC=4;AN=4;DP4=0,0,9,0;MQ=31	GT:PL:DP:DV:SP:DP4	1/1:104,9,0:3:3:0:0,0,3,0	1/1:93,18,0:6:6:0:0,0,6,0
Locus_2_Transcript_877/4817_Confidence_1.000_Length_424	103	.	A	G	82	PASS	DP=22;VDB=0.395707;SGB=-4.72185;RPB=0.0266037;MQB=0.116133;BQB=0.826105;MQ0F=0;ICB=0.5;HOB=0.5;AC=2;AN=4;DP4=9,0,9,0;MQ=35	GT:PL:DP:DV:SP:DP4	0/1:78,0,111:8:3:0:5,0,3,0	0/1:68,0,89:10:6:0:4,0,6,0
Locus_2_Transcript_877/4817_Confidence_1.000_Length_424	145	.	C	G	100	PASS	DP=31;VDB=0.954906;SGB=-4.41269;RPB=0.194177;MQB=0.576169;MQSB=1;BQB=0.936543;MQ0F=0;ICB=0.5;HOB=0.5;AC=2;AN=4;DP4=12,1,8,0;MQ=40	GT:PL:DP:DV:SP:DP4	0/1:122,0,130:12:6:0:6,0,6,0	0/1:42,0,138:9:2:0:6,1,2,0
Locus_2_Transcript_877/4817_Confidence_1.000_Length_424	167	.	T	C	184	PASS	DP=37;VDB=0.706638;SGB=-6.87129;RPB=0.828232;MQB=0.268113;MQSB=0.128993;BQB=0.828232;MQ0F=0;ICB=0.5;HOB=0.5;AC=2;AN=4;DP4=12,1,13,3;MQ=36	GT:PL:DP:DV:SP:DP4	0/1:134,0,98:13:8:0:5,0,8,0	0/1:113,0,142:16:8:2:7,1,5,3
Locus_2_Transcript_877/4817_Confidence_1.000_Length_424	181	.	C	T	224	PASS	DP=38;VDB=0.236607;SGB=-7.17815;RPB=0.502339;MQB=0.36644;MQSB=0.128993;BQB=0.541861;MQ0F=0;ICB=0.5;HOB=0.5;AC=2;AN=4;DP4=12,0,13,4;MQ=36	GT:PL:DP:DV:SP:DP4	0/1:160,0,96:14:9:0:5,0,9,0	0/1:127,0,126:15:8:11:7,0,4,4
Locus_2_Transcript_877/4817_Confidence_1.000_Length_424	274	.	A	G	163	PASS	DP=37;VDB=0.269441;SGB=-5.02958;RPB=0.934851;MQB=0.490869;MQSB=0.932887;BQB=0.656356;MQ0F=0.027027;ICB=0.5;HOB=0.5;AC=2;AN=4;DP4=10,9,3,7;MQ=36	GT:PL:DP:DV:SP:DP4	0/1:81,0,212:13:4:7:7,2,1,3	0/1:146,0,152:16:6:0:3,7,2,4
Locus_2_Transcript_880/4817_Confidence_1.000_Length_288	100	.	A	G	66	PASS	DP=23;VDB=0.54263;SGB=-4.72062;RPB=1;MQB=0.99308;BQB=0.810528;MQ0F=0.0869565;ICB=0.3;HOB=0.125;AC=3;AN=4;DP4=6,0,9,0;MQ=31	GT:PL:DP:DV:SP:DP4	1/1:9,6,0:2:2:0:0,0,2,0	0/1:120,0,111:13:7:0:6,0,7,0
Locus_2_Transcript_886/4817_Confidence_1.000_Length_912	109	.	T	A	206	PASS	DP=76;VDB=0.087333;SGB=-10.8604;RPB=0.980867;MQB=0.894695;BQB=0.159386;MQ0F=0;ICB=0.5;HOB=0.5;AC=2;AN=4;DP4=21,0,29,0;MQ=36	GT:PL:DP:DV:SP:DP4	0/1:98,0,156:14:5:0:9,0,5,0	0/1:171,0,133:36:24:0:12,0,24,0
Locus_2_Transcript_886/4817_Confidence_1.000_Length_912	185	.	G	A	361	PASS	DP=94;VDB=0.00296046;SGB=-13.0084;RPB=0.000119789;MQB=0.0664003;MQSB=0.751641;BQB=0.232589;MQ0F=0;ICB=0.5;HOB=0.5;AC=2;AN=4;DP4=27,8,21,15;MQ=37	GT:PL:DP:DV:SP:DP4	0/1:169,0,247:24:8:0:13,3,6,2	0/1:255,0,246:47:28:6:14,5,15,13
Locus_2_Transcript_886/4817_Confidence_1.000_Length_912	349	.	T	A	153	PASS	DP=73;VDB=0.170157;SGB=-6.87126;RPB=0.99966;MQB=0.00563179;MQSB=0.0578057;BQB=0.736058;MQ0F=0;ICB=0.5;HOB=0.5;AC=2;AN=4;DP4=25,17,11,5;MQ=39	GT:PL:DP:DV:SP:DP4	0/1:102,0,228:16:5:16:3,8,5,0	0/1:117,0,255:42:11:3:22,9,6,5
Locus_2_Transcript_886/4817_Confidence_1.000_Length_912	361	.	G	C	316	PASS	DP=88;VDB=0.880312;SGB=-8.40556;RPB=0.497885;MQB=0.902897;MQSB=0.0877119;BQB=0.945323;MQ0F=0;ICB=0.5;HOB=0.5;AC=2;AN=4;DP4=22,20,13,8;MQ=39	GT:PL:DP:DV:SP:DP4	0/1:151,0,239:16:6:0:5,5,3,3	0/1:229,0,255:47:15:3:17,15,10,5
Locus_2_Transcript_886/4817_Confidence_1.000_Length_912	370	.	C	T	139	PASS	DP=87;VDB=0.570115;SGB=-6.87115;RPB=0.95823;MQB=0.000883138;MQSB=0.135678;BQB=0.993012;MQ0F=0;ICB=0.5;HOB=0.5;AC=2;AN=4;DP4=27,20,8,8;MQ=38	GT:PL:DP:DV:SP:DP4	0/1:59,0,254:16:3:12:4,9,3,0	0/1:147,0,255:47:13:10:23,11,5,8
Locus_2_Transcript_886/4817_Confidence_1.000_Length_912	440	.	T	C	296	PASS	DP=69;VDB=0.0016721;SGB=2.69769;RPB=0.975554;MQB=0.552686;MQSB=0.10127;BQB=0.188539;MQ0F=0;ICB=0.5;HOB=0.5;AC=2;AN=4;DP4=7,4,15,24;MQ=38	GT:PL:DP:DV:SP:DP4	0/1:105,0,118:8:4:0:2,2,2,2	0/1:255,0,69:42:35:9:5,2,13,22
Locus_2_Transcript_886/4817_Confidence_1.000_Length_912	442	.	C	T	296	PASS	DP=70;VDB=0.00169149;SGB=2.69769;RPB=0.98848;MQB=0.552686;MQSB=0.10127;BQB=0.0560681;MQ0F=0;ICB=0.5;HOB=0.5;AC=2;AN=4;DP4=7,4,15,24;MQ=38	GT:PL:DP:DV:SP:DP4	0/1:105,0,118:8:4:0:2,2,2,2	0/1:255,0,75:42:35:9:5,2,13,22
Locus_2_Transcript_886/4817_Confidence_1.000_Length_912	444	.	T	C	348	PASS	DP=68;VDB=3.5255e-05;SGB=1.72622;RPB=0.562209;MQB=0.684215;MQSB=0.155056;BQB=0.562209;MQ0F=0;ICB=0.5;HOB=0.5;AC=2;AN=4;DP4=5,4,15,26;MQ=38	GT:PL:DP:DV:SP:DP4	0/1:160,0,41:8:6:4:0,2,4,2	0/1:255,0,72:42:35:11:5,2,11,24
Locus_2_Transcript_887/4817_Confidence_1.000_Length_284	121	.	T	C	443	PASS	DP=138;VDB=0.394226;SGB=-23.4414;RPB=0.431294;MQB=0.00680407;MQSB=1.89683e-08;BQB=0.9569;MQ0F=0;ICB=0.5;HOB=0.5;AC=2;AN=4;DP4=27,6,55,15;MQ=36	GT:PL:DP:DV:SP:DP4	0/1:255,0,185:52:33:17:18,1,21,12	0/1:252,0,198:51:37:16:9,5,34,3
Locus_2_Transcript_887/4817_Confidence_1.000_Length_284	165	.	T	C	186	PASS	DP=181;VDB=9.8056e-06;SGB=-10.2467;RPB=0.337703;MQB=9.03565e-05;MQSB=0.553013;BQB=0.178667;MQ0F=0;ICB=0.5;HOB=0.5;AC=2;AN=4;DP4=53,23,25,2;MQ=36	GT:PL:DP:DV:SP:DP4	0/1:173,0,255:50:16:3:26,8,14,2	0/1:79,0,255:53:11:16:27,15,11,0
Locus_2_Transcript_887/4817_Confidence_1.000_Length_284	197	.	T	C	265	PASS	DP=140;VDB=7.77024e-05;SGB=-10.2467;RPB=0.0678431;MQB=4.58299e-05;MQSB=0.0479512;BQB=0.058202;MQ0F=0;ICB=0.5;HOB=0.5;AC=2;AN=4;DP4=30,34,20,7;MQ=36	GT:PL:DP:DV:SP:DP4	0/1:211,0,255:42:16:7:12,14,11,5	0/1:119,0,255:49:11:11:18,20,9,2
Locus_2_Transcript_887/4817_Confidence_1.000_Length_284	224	.	C	T	411	PASS	DP=111;VDB=3.12381e-09;SGB=-15.1563;RPB=0.350276;MQB=1.26484e-05;MQSB=0.00360717;BQB=0.192525;MQ0F=0;ICB=0.5;HOB=0.5;AC=2;AN=4;DP4=7,32,21,22;MQ=36	GT:PL:DP:DV:SP:DP4	0/1:255,0,150:38:25:23:1,12,14,11	0/1:219,0,255:44:18:5:6,20,7,11
Locus_2_Transcript_887/4817_Confidence_1.000_Length_284	265	.	G	A	227	PASS	DP=36;VDB=6.59101e-12;SGB=-8.71242;RPB=0.55305;MQB=0.507451;BQB=0.243713;MQ0F=0;ICB=0.5;HOB=0.5;AC=2;AN=4;DP4=0,11,0,22;MQ=35	GT:PL:DP:DV:SP:DP4	0/1:150,0,83:19:12:0:0,7,0,12	0/1:142,0,63:14:10:0:0,4,0,10
Locus_2_Transcript_888/4817_Confidence_1.000_Length_356	262	.	T	C	132	PASS	DP=96;VDB=0.27488;SGB=-11.1672;RPB=0.946456;MQB=0.783564;MQSB=0.999982;BQB=0.584702;MQ0F=0.197917;ICB=0.5;HOB=0.5;AC=2;AN=4;DP4=13,28,13,17;MQ=16	GT:PL:DP:DV:SP:DP4	0/1:17,0,89:25:12:18:0,13,5,7	0/1:179,0,138:46:18:0:13,15,8,10
Locus_2_Transcript_895/4817_Confidence_1.000_Length_373	224	.	C	G	91	PASS	DP=38;VDB=0.456334;SGB=-4.10417;RPB=0.276453;MQB=0.23423;MQSB=0.993769;BQB=0.85106;MQ0F=0.0263158;ICB=0.5;HOB=0.5;AC=2;AN=4;DP4=12,4,6,1;MQ=30	GT:PL:DP:DV:SP:DP4	0/1:39,0,139:13:2:0:9,2,2,0	0/1:116,0,95:10:5:0:3,2,4,1
Locus_2_Transcript_895/4817_Confidence_1.000_Length_373	237	.	G	A	262	PASS	DP=36;VDB=0.748351;SGB=-1.30935;RPB=0.721089;MQB=0.991881;MQSB=0.98316;BQB=0.670684;MQ0F=0.0277778;ICB=0.5;HOB=0.5;AC=2;AN=4;DP4=3,1,13,5;MQ=31	GT:PL:DP:DV:SP:DP4	0/1:139,0,59:13:10:0:2,1,8,2	0/1:190,0,15:9:8:0:1,0,5,3
Locus_2_Transcript_895/4817_Confidence_1.000_Length_373	326	.	T	C	86	PASS	DP=14;VDB=0.0434956;SGB=-4.10417;RPB=0.961166;MQB=0.623736;MQSB=1;BQB=0.899815;MQ0F=0.142857;ICB=0.5;HOB=0.5;AC=2;AN=4;DP4=1,5,0,7;MQ=31	GT:PL:DP:DV:SP:DP4	0/1:53,0,46:5:2:0:1,2,0,2	0/1:97,0,45:8:5:0:0,3,0,5
Locus_2_Transcript_896/4817_Confidence_1.000_Length_278	150	.	A	C	74	PASS	DP=200;VDB=2.35423e-06;SGB=-10.5535;RPB=0.386425;MQB=0.984001;BQB=0.988021;MQ0F=0.085;ICB=0.5;HOB=0.5;AC=2;AN=4;DP4=94,0,28,0;MQ=24	GT:PL:DP:DV:SP:DP4	0/1:77,0,154:52:12:0:40,0,12,0	0/1:63,0,142:70:16:0:54,0,16,0
Locus_2_Transcript_900/4817_Confidence_1.000_Length_214	49	.	C	G	61	PASS	DP=22;VDB=0.0299925;SGB=-3.47587;RPB=0.156524;MQB=0.193441;BQB=0.594648;MQ0F=0;ICB=0.3;HOB=0.125;AC=3;AN=4;DP4=11,0,5,0;MQ=33	GT:PL:DP:DV:SP:DP4	1/1:124,12,0:4:4:0:0,0,4,0	0/1:1,0,122:12:1:0:11,0,1,0
Locus_2_Transcript_900/4817_Confidence_1.000_Length_214	160	.	T	C	194	PASS	DP=27;VDB=0.000472185;SGB=-5.64284;RPB=0.97296;MQB=0.755254;MQSB=0.848133;BQB=0.503936;MQ0F=0;ICB=0.3;HOB=0.125;AC=3;AN=4;DP4=1,5,8,4;MQ=33	GT:PL:DP:DV:SP:DP4	1/1:75,6,0:2:2:0:0,0,2,0	0/1:183,0,87:16:10:8:1,5,6,4
Locus_2_Transcript_900/4817_Confidence_1.000_Length_214	173	.	T	C	90	PASS	DP=22;VDB=0.0151535;SGB=-4.09964;RPB=0.161524;MQB=0.87319;MQSB=0.972604;BQB=0.785785;MQ0F=0;ICB=0.5;HOB=0.5;AC=2;AN=4;DP4=4,4,2,5;MQ=33	GT:PL:DP:DV:SP:DP4	0/1:31,0,34:2:1:0:1,0,0,1	0/1:122,0,153:13:6:0:3,4,2,4
Locus_2_Transcript_915/4817_Confidence_1.000_Length_245	56	.	T	C	77	PASS	DP=20;VDB=0.0177591;SGB=-0.809454;RPB=0.769231;MQB=0.153846;BQB=0.615385;MQ0F=0.25;ICB=0.3;HOB=0.125;AC=3;AN=4;DP4=2,0,13,0;MQ=22	GT:PL:DP:DV:SP:DP4	1/1:62,9,0:3:3:0:0,0,3,0	0/1:80,0,36:12:10:0:2,0,10,0
Locus_2_Transcript_915/4817_Confidence_1.000_Length_245	126	.	T	C	73	PASS	DP=34;VDB=0.777487;SGB=-0.906886;RPB=0.368421;MQB=0.0526316;MQSB=0.994334;BQB=0.631579;MQ0F=0.176471;ICB=0.3;HOB=0.125;AC=3;AN=4;DP4=1,1,11,8;MQ=19	GT:PL:DP:DV:SP:DP4	1/1:59,15,0:5:5:0:0,0,2,3	0/1:79,0,36:16:14:0:1,1,9,5
Locus_2_Transcript_915/4817_Confidence_1.000_Length_245	177	.	T	C	104	PASS	DP=16;VDB=0.0797554;SGB=-0.885054;RPB=0.283536;MQB=0.687289;MQSB=1;BQB=0.976835;MQ0F=0.0625;ICB=0.3;HOB=0.125;AC=3;AN=4;DP4=0,3,1,11;MQ=25	GT:PL:DP:DV:SP:DP4	1/1:57,9,0:3:3:0:0,0,0,3	0/1:112,0,40:12:9:0:0,3,1,8
Locus_2_Transcript_915/4817_Confidence_1.000_Length_245	185	.	T	C	100	PASS	DP=16;VDB=0.0374523;SGB=-0.949327;RPB=0.201286;MQB=0.693041;MQSB=1;BQB=0.201286;MQ0F=0.0625;ICB=0.3;HOB=0.125;AC=3;AN=4;DP4=0,3,1,10;MQ=25	GT:PL:DP:DV:SP:DP4	1/1:57,9,0:3:3:0:0,0,0,3	0/1:108,0,36:11:8:0:0,3,1,7
Locus_2_Transcript_919/4817_Confidence_1.000_Length_351	56	.	A	G	78	PASS	DP=59;VDB=0.0010386;SGB=-1.03473;RPB=0.00372611;MQB=0.0977015;BQB=0.0164292;MQ0F=0.0508475;ICB=0.5;HOB=0.5;AC=2;AN=4;DP4=10,0,35,0;MQ=18	GT:PL:DP:DV:SP:DP4	0/1:96,0,52:14:10:0:4,0,10,0	0/1:47,0,40:31:25:0:6,0,25,0
Locus_2_Transcript_919/4817_Confidence_1.000_Length_351	114	.	A	G	74	PASS	DP=165;VDB=9.03448e-11;SGB=-20.066;RPB=8.86632e-05;MQB=0.683934;MQSB=0.486885;BQB=0.36423;MQ0F=0.0363636;ICB=0.5;HOB=0.5;AC=2;AN=4;DP4=46,6,59,0;MQ=19	GT:PL:DP:DV:SP:DP4	0/1:68,0,143:35:19:11:13,3,19,0	0/1:69,0,128:76:40:10:33,3,40,0
Locus_2_Transcript_919/4817_Confidence_1.000_Length_351	128	.	T	C	114	PASS	DP=174;VDB=9.11478e-07;SGB=-1.16593;RPB=0.995248;MQB=0.0032641;MQSB=0.737762;BQB=0.591446;MQ0F=0.0344828;AC=4;AN=4;DP4=2,2,99,5;MQ=18	GT:PL:DP:DV:SP:DP4	1/1:73,51,0:31:30:0:1,0,30,0	1/1:96,124,0:77:74:17:1,2,69,5
Locus_2_Transcript_919/4817_Confidence_1.000_Length_351	130	.	T	C	103	PASS	DP=175;VDB=7.88991e-07;SGB=-1.20128;RPB=0.922349;MQB=0.00122224;MQSB=0.737762;BQB=0.83919;MQ0F=0.0342857;AC=4;AN=4;DP4=3,2,98,5;MQ=18	GT:PL:DP:DV:SP:DP4	1/1:74,51,0:31:30:0:1,0,30,0	1/1:84,102,0:77:73:14:2,2,68,5
Locus_2_Transcript_919/4817_Confidence_1.000_Length_351	144	.	T	A	251	PASS	DP=183;VDB=9.11e-05;SGB=-1.00758;RPB=0.993216;MQB=0.0138565;MQSB=0.795515;BQB=0.516111;MQ0F=0.0327869;AC=4;AN=4;DP4=1,2,105,13;MQ=19	GT:PL:DP:DV:SP:DP4	1/1:185,99,0:33:33:0:0,0,28,5	1/1:121,157,0:88:85:15:1,2,77,8
Locus_2_Transcript_919/4817_Confidence_1.000_Length_351	184	.	T	G	326	PASS	DP=189;VDB=0.00176259;SGB=-0.157023;RPB=0.259792;MQB=0.00201372;MQSB=0.203842;BQB=0.719328;MQ0F=0.015873;AC=4;AN=4;DP4=2,3,82,41;MQ=20	GT:PL:DP:DV:SP:DP4	1/1:165,32,0:34:32:7:0,2,19,13	1/1:216,181,0:94:91:0:2,1,63,28
Locus_2_Transcript_919/4817_Confidence_1.000_Length_351	215	.	T	C	322	PASS	DP=160;VDB=0.0263989;SGB=5.56644;RPB=0.916165;MQB=0.00290976;MQSB=0.013951;BQB=0.357838;MQ0F=0.0125;ICB=0.3;HOB=0.125;AC=3;AN=4;DP4=1,4,53,44;MQ=22	GT:PL:DP:DV:SP:DP4	0/1:153,0,15:18:16:0:0,2,5,11	1/1:233,158,0:84:81:2:1,2,48,33
Locus_2_Transcript_919/4817_Confidence_1.000_Length_351	236	.	T	C	347	PASS	DP=127;VDB=0.00201677;SGB=2.76361;RPB=0.982851;MQB=0.0133994;MQSB=0.0506365;BQB=0.284353;MQ0F=0;AC=4;AN=4;DP4=1,3,37,49;MQ=22	GT:PL:DP:DV:SP:DP4	1/1:154,0,6:19:17:0:0,2,5,12	1/1:253,153,0:71:69:0:1,1,32,37
Locus_2_Transcript_919/4817_Confidence_1.000_Length_351	276	.	G	A	102	PASS	DP=76;VDB=0.000416587;SGB=-7.17804;RPB=0.804541;MQB=0.405737;MQSB=0.260023;BQB=0.951995;MQ0F=0;ICB=0.5;HOB=0.5;AC=2;AN=4;DP4=10,34,5,12;MQ=25	GT:PL:DP:DV:SP:DP4	0/1:44,0,127:12:3:0:2,7,1,2	0/1:123,0,212:49:14:1:8,27,4,10
Locus_2_Transcript_919/4817_Confidence_1.000_Length_351	296	.	C	G	354	PASS	DP=48;VDB=2.6959e-08;SGB=-0.68217;MQSB=0.805561;MQ0F=0;AC=4;AN=4;DP4=0,0,9,27;MQ=24	GT:PL:DP:DV:SP:DP4	1/1:157,27,0:9:9:0:0,0,2,7	1/1:251,81,0:27:27:0:0,0,7,20
Locus_2_Transcript_919/4817_Confidence_1.000_Length_351	310	.	T	C	113	PASS	DP=36;VDB=9.74399e-07;SGB=-6.87126;RPB=0.277247;MQB=0.630132;MQSB=0.162236;BQB=0.995571;MQ0F=0;ICB=0.5;HOB=0.5;AC=2;AN=4;DP4=1,15,2,14;MQ=24	GT:PL:DP:DV:SP:DP4	0/1:61,0,62:9:5:0:0,4,0,5	0/1:115,0,92:23:11:2:1,11,2,9
Locus_2_Transcript_919/4817_Confidence_1.000_Length_351	318	.	G	A	131	PASS	DP=26;VDB=4.90242e-09;SGB=-0.829483;RPB=0.973361;MQB=0.486387;MQSB=0.25;BQB=1;MQ0F=0;ICB=0.5;HOB=0.5;AC=2;AN=4;DP4=0,4,2,18;MQ=24	GT:PL:DP:DV:SP:DP4	0/1:64,0,19:6:5:0:0,1,0,5	0/1:133,0,10:18:15:0:0,3,2,13
Locus_2_Transcript_921/4817_Confidence_1.000_Length_204	29	.	T	C	171	PASS	DP=17;VDB=0.00010026;SGB=-0.809454;RPB=1;MQB=1;BQB=1;MQ0F=0;AC=4;AN=4;DP4=1,0,13,0;MQ=36	GT:PL:DP:DV:SP:DP4	1/1:71,9,0:3:3:0:0,0,3,0	1/1:155,6,0:11:10:0:1,0,10,0
Locus_2_Transcript_921/4817_Confidence_1.000_Length_204	32	.	T	C	164	PASS	DP=20;VDB=9.25785e-05;SGB=-0.809454;RPB=1;MQB=1;BQB=1;MQ0F=0;AC=4;AN=4;DP4=1,0,13,0;MQ=36	GT:PL:DP:DV:SP:DP4	1/1:71,9,0:3:3:0:0,0,3,0	1/1:151,0,4:11:10:0:1,0,10,0
Locus_2_Transcript_923/4817_Confidence_1.000_Length_219	39	.	C	T	100	PASS	DP=24;VDB=0.0199125;SGB=-5.02958;RPB=0.818054;MQB=0.99938;BQB=0.927743;MQ0F=0;ICB=0.5;HOB=0.5;AC=2;AN=4;DP4=11,0,10,0;MQ=31	GT:PL:DP:DV:SP:DP4	0/1:73,0,9:5:4:0:1,0,4,0	0/1:90,0,132:16:6:0:10,0,6,0
Locus_2_Transcript_923/4817_Confidence_1.000_Length_219	153	.	G	A	274	PASS	DP=67;VDB=0.10705;SGB=-7.79186;RPB=0.765385;MQB=0.998534;MQSB=0.45433;BQB=0.297412;MQ0F=0.0597015;ICB=0.5;HOB=0.5;AC=2;AN=4;DP4=16,5,11,8;MQ=31	GT:PL:DP:DV:SP:DP4	0/1:188,0,29:13:10:3:3,0,7,3	0/1:150,0,255:27:9:7:13,5,4,5
Locus_2_Transcript_931/4817_Confidence_1.000_Length_1037	236	.	T	C	162	PASS	DP=15;VDB=0.827164;SGB=-0.490673;RPB=0.785785;MQB=0.953497;MQSB=0.968368;BQB=0.826565;MQ0F=0;ICB=0.3;HOB=0.125;AC=3;AN=4;DP4=3,1,7,2;MQ=41	GT:PL:DP:DV:SP:DP4	1/1:37,3,0:1:1:0:0,0,1,0	0/1:189,0,97:12:8:0:3,1,6,2
Locus_2_Transcript_931/4817_Confidence_1.000_Length_1037	855	.	C	T	72	PASS	DP=24;VDB=0.0575781;SGB=1.94933;RPB=0.934209;MQB=0.449329;MQSB=0.968927;BQB=0.36331;MQ0F=0;ICB=0.3;HOB=0.125;AC=1;AN=4;DP4=7,5,4,1;MQ=41	GT:PL:DP:DV:SP:DP4	0/0:0,21,207:7:0:0:4,3,0,0	0/1:136,0,118:10:5:0:3,2,4,1
Locus_2_Transcript_934/4817_Confidence_1.000_Length_380	215	.	T	C	62	PASS	DP=13;VDB=0.148315;SGB=-3.4825;RPB=0.150134;MQB=0.750668;MQSB=0.666667;BQB=0.900802;MQ0F=0;ICB=0.5;HOB=0.5;AC=2;AN=4;DP4=2,1,4,1;MQ=34	GT:PL:DP:DV:SP:DP4	0/1:47,0,15:3:2:0:0,1,2,0	0/1:79,0,63:5:3:0:2,0,2,1
Locus_2_Transcript_934/4817_Confidence_1.000_Length_380	221	.	A	G	84	PASS	DP=13;VDB=0.19611;SGB=-1.02307;RPB=0;MQB=0.166667;MQSB=0.666667;BQB=0.166667;MQ0F=0;ICB=0.3;HOB=0.125;AC=3;AN=4;DP4=2,0,4,2;MQ=34	GT:PL:DP:DV:SP:DP4	1/1:79,9,0:3:3:0:0,0,2,1	0/1:69,0,63:5:3:0:2,0,2,1
Locus_2_Transcript_934/4817_Confidence_1.000_Length_380	226	.	T	G	84	PASS	DP=13;VDB=0.203362;SGB=-1.02307;RPB=0.166667;MQB=0.166667;MQSB=0.666667;BQB=0.166667;MQ0F=0;ICB=0.3;HOB=0.125;AC=3;AN=4;DP4=2,0,4,2;MQ=34	GT:PL:DP:DV:SP:DP4	1/1:69,9,0:3:3:0:0,0,2,1	0/1:79,0,63:5:3:0:2,0,2,1
Locus_2_Transcript_934/4817_Confidence_1.000_Length_380	229	.	A	T	84	PASS	DP=13;VDB=0.210772;SGB=-1.02307;RPB=0;MQB=0.166667;MQSB=0.666667;BQB=0.166667;MQ0F=0;ICB=0.3;HOB=0.125;AC=3;AN=4;DP4=2,0,4,2;MQ=34	GT:PL:DP:DV:SP:DP4	1/1:79,9,0:3:3:0:0,0,2,1	0/1:69,0,63:5:3:0:2,0,2,1
Locus_2_Transcript_934/4817_Confidence_1.000_Length_380	230	.	A	C	73	PASS	DP=13;VDB=0.203362;SGB=-1.02307;RPB=0;MQB=0.166667;MQSB=0.666667;BQB=0.166667;MQ0F=0;ICB=0.3;HOB=0.125;AC=3;AN=4;DP4=2,0,4,2;MQ=34	GT:PL:DP:DV:SP:DP4	1/1:79,9,0:3:3:0:0,0,2,1	0/1:58,0,63:5:3:0:2,0,2,1
Locus_2_Transcript_937/4817_Confidence_1.000_Length_222	163	.	C	G	102	PASS	DP=12;VDB=0.0186234;SGB=3.78914;MQSB=0;MQ0F=0.166667;AC=2;AN=2;DP4=0,0,2,7;MQ=26	GT:PL:DP:DV:SP:DP4	./.:0,0,0:0:0:0:0,0,0,0	1/1:157,27,0:9:9:0:0,0,2,7
Locus_2_Transcript_938/4817_Confidence_1.000_Length_267	122	.	A	G	80	PASS	DP=11;VDB=0.496546;SGB=-0.680382;MQ0F=0;AC=4;AN=4;DP4=0,0,7,0;MQ=28	GT:PL:DP:DV:SP:DP4	1/1:37,3,0:1:1:0:0,0,1,0	1/1:97,18,0:6:6:0:0,0,6,0
Locus_2_Transcript_939/4817_Confidence_1.000_Length_268	134	.	T	G	272	PASS	DP=153;VDB=0.0142981;SGB=-1.38619;RPB=0.800614;MQB=0.0818526;MQSB=0.685343;BQB=0.737805;MQ0F=0.111111;ICB=0.3;HOB=0.125;AC=3;AN=4;DP4=18,0,64,3;MQ=16	GT:PL:DP:DV:SP:DP4	1/1:135,59,0:42:36:0:6,0,36,0	0/1:202,0,21:43:31:3:12,0,28,3
Locus_2_Transcript_939/4817_Confidence_1.000_Length_268	152	.	T	C	85	PASS	DP=178;VDB=0.00808842;SGB=-16.0769;RPB=0.120396;MQB=0.0257156;MQSB=0.619716;BQB=0.348255;MQ0F=0.123596;ICB=0.5;HOB=0.5;AC=2;AN=4;DP4=45,1,44,2;MQ=15	GT:PL:DP:DV:SP:DP4	0/1:31,0,109:46:22:0:24,0,22,0	0/1:118,0,174:46:24:0:21,1,22,2
Locus_2_Transcript_941/4817_Confidence_1.000_Length_262	28	.	C	G	250	PASS	DP=233;VDB=0;SGB=-1.38629;RPB=0.0286433;MQB=0.213931;BQB=0.407492;MQ0F=0.055794;AC=4;AN=4;DP4=12,0,169,0;MQ=33	GT:PL:DP:DV:SP:DP4	1/1:171,161,0:96:92:0:4,0,92,0	1/1:134,70,0:85:77:0:8,0,77,0
Locus_2_Transcript_941/4817_Confidence_1.000_Length_262	55	.	G	C	134	PASS	DP=526;VDB=2.05717e-09;SGB=-40.932;RPB=0.435379;MQB=0.805594;BQB=0.887187;MQ0F=0.0323194;ICB=0.5;HOB=0.5;AC=2;AN=4;DP4=280,0,127,0;MQ=36	GT:PL:DP:DV:SP:DP4	0/1:113,0,199:192:61:0:131,0,61,0	0/1:86,0,170:215:66:0:149,0,66,0
Locus_2_Transcript_941/4817_Confidence_1.000_Length_262	206	.	A	C	74	PASS	DP=752;VDB=1.6427e-11;SGB=-25.2825;RPB=0.984604;MQB=0.929411;MQSB=2.95274e-08;BQB=0.256275;MQ0F=0.0319149;ICB=0.3;HOB=0.125;AC=1;AN=4;DP4=184,264,42,34;MQ=32	GT:PL:DP:DV:SP:DP4	0/1:139,0,255:198:44:6:70,84,25,19	0/0:0,212,255:326:32:9:114,180,17,15
Locus_2_Transcript_941/4817_Confidence_1.000_Length_262	224	.	A	G	201	PASS	DP=559;VDB=9.57948e-29;SGB=-39.0909;RPB=0.0238928;MQB=0.159563;MQSB=1.27992e-12;BQB=0.863786;MQ0F=0.0375671;ICB=0.5;HOB=0.5;AC=2;AN=4;DP4=84,239,31,90;MQ=30	GT:PL:DP:DV:SP:DP4	0/1:219,0,255:171:57:8:30,84,21,36	0/1:48,0,255:273:64:9:54,155,10,54
Locus_2_Transcript_942/4817_Confidence_1.000_Length_298	44	.	C	A	172	PASS	DP=223;VDB=1.95381e-34;SGB=-1.38629;RPB=0.778813;MQB=1.60947e-07;BQB=1;MQ0F=0.282511;ICB=0.5;HOB=0.5;AC=2;AN=4;DP4=39,0,130,0;MQ=25	GT:PL:DP:DV:SP:DP4	0/1:115,0,72:70:56:0:14,0,56,0	0/1:121,0,106:99:74:0:25,0,74,0
Locus_2_Transcript_942/4817_Confidence_1.000_Length_298	55	.	T	G	211	PASS	DP=278;VDB=1.0374e-19;SGB=-1.38629;RPB=0.335404;MQB=0.00150121;BQB=0.968804;MQ0F=0.31295;AC=4;AN=4;DP4=11,0,187,0;MQ=23	GT:PL:DP:DV:SP:DP4	1/1:104,46,0:78:71:0:7,0,71,0	1/1:162,223,0:120:116:0:4,0,116,0
Locus_2_Transcript_942/4817_Confidence_1.000_Length_298	57	.	A	G	110	PASS	DP=292;VDB=8.16304e-21;SGB=-1.38629;RPB=0.831203;MQB=4.41791e-05;BQB=0.978616;MQ0F=0.311644;AC=4;AN=4;DP4=21,0,182,0;MQ=24	GT:PL:DP:DV:SP:DP4	1/1:83,19,0:83:74:0:9,0,74,0	1/1:83,66,0:120:108:0:12,0,108,0
Locus_2_Transcript_942/4817_Confidence_1.000_Length_298	98	.	C	G	191	PASS	DP=436;VDB=0.0195487;SGB=-27.7373;RPB=0.0642938;MQB=6.65174e-08;BQB=0.906371;MQ0F=0.28211;ICB=0.5;HOB=0.5;AC=2;AN=4;DP4=184,0,84,0;MQ=23	GT:PL:DP:DV:SP:DP4	0/1:104,0,124:116:30:0:86,0,30,0	0/1:151,0,150:152:54:0:98,0,54,0
Locus_2_Transcript_942/4817_Confidence_1.000_Length_298	209	.	G	A	349	PASS	DP=370;VDB=5.04178e-06;SGB=-52.2855;RPB=0.985079;MQB=1.83591e-11;MQSB=0.209287;BQB=0.173601;MQ0F=0.12973;ICB=0.5;HOB=0.5;AC=2;AN=4;DP4=29,50,87,77;MQ=22	GT:PL:DP:DV:SP:DP4	0/1:167,0,255:92:51:7:14,27,25,26	0/1:245,0,210:151:113:9:15,23,62,51
Locus_2_Transcript_942/4817_Confidence_1.000_Length_298	263	.	G	C	219	PASS	DP=195;VDB=6.62389e-24;SGB=-29.8853;RPB=7.04527e-07;MQB=9.45958e-11;MQSB=0.788517;BQB=0.872946;MQ0F=0.0820513;ICB=0.5;HOB=0.5;AC=2;AN=4;DP4=16,43,28,63;MQ=21	GT:PL:DP:DV:SP:DP4	0/1:104,0,254:52:29:0:7,16,9,20	0/1:179,0,255:98:62:2:9,27,19,43
Locus_2_Transcript_942/4817_Confidence_1.000_Length_298	284	.	C	A	271	PASS	DP=104;VDB=2.4775e-21;SGB=-16.9974;RPB=0.089066;MQB=0.0965588;MQSB=0.910925;BQB=0.936869;MQ0F=0.0865385;ICB=0.5;HOB=0.5;AC=2;AN=4;DP4=5,29,10,39;MQ=24	GT:PL:DP:DV:SP:DP4	0/1:79,0,182:29:15:5:3,11,1,14	0/1:255,0,121:54:34:7:2,18,9,25
Locus_2_Transcript_945/4817_Confidence_1.000_Length_375	165	.	A	G	93	PASS	DP=30;VDB=0.181439;SGB=-0.906886;RPB=0.473684;MQB=0.736842;MQSB=0.844127;BQB=0.789474;MQ0F=0.266667;AC=4;AN=4;DP4=1,1,16,3;MQ=12	GT:PL:DP:DV:SP:DP4	1/1:77,15,0:5:5:0:0,0,3,2	1/1:71,19,0:16:14:6:1,1,13,1
Locus_2_Transcript_945/4817_Confidence_1.000_Length_375	315	.	A	G	116	PASS	DP=20;VDB=0.000116892;SGB=-0.2799;MQSB=0.5625;MQ0F=0.2;AC=4;AN=4;DP4=0,0,2,16;MQ=14	GT:PL:DP:DV:SP:DP4	1/1:58,9,0:3:3:0:0,0,0,3	1/1:112,45,0:15:15:0:0,0,2,13
Locus_2_Transcript_951/4817_Confidence_1.000_Length_289	184	.	T	C	65	PASS	DP=22;VDB=0.233032;SGB=3.78914;RPB=1;MQB=1;MQSB=1;BQB=1;MQ0F=0;ICB=1;HOB=0.5;AC=1;AN=2;DP4=1,0,8,1;MQ=28	GT:PL:DP:DV:SP:DP4	./.:0,0,0:0:0:0:0,0,0,0	0/1:127,0,12:10:9:0:1,0,8,1
Locus_2_Transcript_960/4817_Confidence_1.000_Length_300	82	.	A	G	127	PASS	DP=173;VDB=0.00448408;SGB=16.4657;RPB=0.838673;MQB=0.99992;BQB=0.854093;MQ0F=0;ICB=0.3;HOB=0.125;AC=1;AN=4;DP4=95,0,26,0;MQ=40	GT:PL:DP:DV:SP:DP4	0/1:191,0,174:43:26:0:17,0,26,0	0/0:0,235,253:78:0:0:78,0,0,0
Locus_2_Transcript_960/4817_Confidence_1.000_Length_300	108	.	T	A	130	PASS	DP=250;VDB=0.038266;SGB=17.852;RPB=0.121675;MQB=0.988666;MQSB=0.0264901;BQB=0.953365;MQ0F=0;ICB=0.3;HOB=0.125;AC=1;AN=4;DP4=123,2,28,0;MQ=40	GT:PL:DP:DV:SP:DP4	0/1:194,0,189:53:28:0:25,0,28,0	0/0:0,255,255:100:0:0:98,2,0,0
Locus_2_Transcript_967/4817_Confidence_1.000_Length_212	181	.	A	G	111	PASS	DP=23;VDB=0.00131677;SGB=2.63044;RPB=0.840624;MQB=0.778801;MQSB=0.651439;BQB=0.984496;MQ0F=0;ICB=0.3;HOB=0.125;AC=1;AN=4;DP4=5,4,3,3;MQ=41	GT:PL:DP:DV:SP:DP4	0/1:175,0,81:9:6:3:3,0,3,3	0/0:0,18,188:6:0:0:2,4,0,0
Locus_2_Transcript_1049/4817_Confidence_1.000_Length_288	224	.	T	C	66	PASS	DP=24;VDB=0.112638;SGB=-1.04872;RPB=0.974685;MQB=0.140417;MQSB=0.0425717;BQB=0.460409;MQ0F=0.0833333;ICB=0.3;HOB=0.125;AC=3;AN=4;DP4=2,2,4,9;MQ=17	GT:PL:DP:DV:SP:DP4	1/1:115,12,0:4:4:0:0,0,2,2	0/1:15,0,69:13:9:3:2,2,2,7
Locus_2_Transcript_1058/4817_Confidence_1.000_Length_641	300	.	G	C	92	PASS	DP=27;VDB=0.645013;SGB=-5.64284;RPB=0.736714;MQB=0.000948881;MQSB=0.511029;BQB=0.867582;MQ0F=0;ICB=0.3;HOB=0.125;AC=1;AN=4;DP4=8,1,5,7;MQ=31	GT:PL:DP:DV:SP:DP4	0/1:156,0,42:12:10:3:2,0,4,6	0/0:0,8,170:9:2:4:6,1,1,1
Locus_2_Transcript_1058/4817_Confidence_1.000_Length_641	391	.	T	C	258	PASS	DP=46;VDB=0.0424839;SGB=-1.31369;RPB=0.134353;MQB=0.03342;MQSB=0.182595;BQB=0.976675;MQ0F=0.130435;ICB=0.3;HOB=0.125;AC=3;AN=4;DP4=4,2,19,7;MQ=28	GT:PL:DP:DV:SP:DP4	1/1:167,4,0:18:16:10:0,2,12,4	0/1:154,0,91:14:10:3:4,0,7,3
Locus_2_Transcript_1058/4817_Confidence_1.000_Length_641	400	.	C	G	86	PASS	DP=44;VDB=0.0509527;SGB=-7.485;RPB=0.991201;MQB=3.9806e-05;MQSB=0.0485296;BQB=0.770696;MQ0F=0.136364;ICB=0.5;HOB=0.5;AC=2;AN=4;DP4=7,7,14,4;MQ=28	GT:PL:DP:DV:SP:DP4	0/1:100,0,132:18:12:10:2,4,10,2	0/1:50,0,200:14:6:0:5,3,4,2
Locus_2_Transcript_1058/4817_Confidence_1.000_Length_641	410	.	T	G	82	PASS	DP=43;VDB=0.0210056;SGB=-7.17814;RPB=0.79638;MQB=5.1068e-05;MQSB=0.0186376;BQB=0.527344;MQ0F=0.139535;ICB=0.5;HOB=0.5;AC=2;AN=4;DP4=5,9,13,4;MQ=28	GT:PL:DP:DV:SP:DP4	0/1:96,0,128:17:11:10:2,4,9,2	0/1:50,0,200:14:6:2:3,5,4,2
Locus_2_Transcript_1067/4817_Confidence_1.000_Length_285	98	.	G	C	93	PASS	DP=12;VDB=0.391417;SGB=-0.680382;RPB=0.714286;MQB=0.714286;BQB=0.142857;MQ0F=0;ICB=0.3;HOB=0.125;AC=3;AN=4;DP4=2,0,7,0;MQ=41	GT:PL:DP:DV:SP:DP4	1/1:37,3,0:1:1:0:0,0,1,0	0/1:120,0,54:8:6:0:2,0,6,0
Locus_2_Transcript_1068/4817_Confidence_1.000_Length_480	257	.	G	A	84	PASS	DP=9;VDB=0.0385499;SGB=-3.4825;RPB=0.150134;MQB=0.450401;MQSB=1;BQB=0.900802;MQ0F=0;ICB=0.3;HOB=0.125;AC=3;AN=4;DP4=2,1,5,0;MQ=40	GT:PL:DP:DV:SP:DP4	1/1:67,6,0:2:2:0:0,0,2,0	0/1:80,0,87:6:3:0:2,1,3,0
Locus_2_Transcript_1068/4817_Confidence_1.000_Length_480	381	.	C	T	79	PASS	DP=34;VDB=0.0223883;SGB=-1.21711;RPB=0.5;MQB=0.84375;MQSB=0.0338821;BQB=0.625;MQ0F=0.411765;ICB=0.3;HOB=0.125;AC=3;AN=4;DP4=2,0,12,4;MQ=14	GT:PL:DP:DV:SP:DP4	1/1:81,18,0:6:6:0:0,0,4,2	0/1:61,0,13:12:10:0:2,0,8,2
Locus_2_Transcript_1068/4817_Confidence_1.000_Length_480	420	.	G	C	81	PASS	DP=28;VDB=0.00198541;SGB=-1.23633;RPB=1;MQB=1;MQSB=0.191205;BQB=1;MQ0F=0.464286;AC=4;AN=4;DP4=0,1,12,3;MQ=10	GT:PL:DP:DV:SP:DP4	1/1:81,18,0:6:6:0:0,0,4,2	1/1:55,20,0:10:9:0:0,1,8,1
Locus_2_Transcript_1070/4817_Confidence_1.000_Length_575	484	.	T	A	61	PASS	DP=15;VDB=0.0904733;SGB=1.94933;RPB=0.99778;MQB=0.945959;MQSB=1;BQB=0.375311;MQ0F=0;ICB=0.3;HOB=0.125;AC=1;AN=4;DP4=0,9,1,4;MQ=39	GT:PL:DP:DV:SP:DP4	0/0:0,6,67:2:0:0:0,2,0,0	0/1:124,0,110:12:5:0:0,7,1,4
Locus_2_Transcript_1078/4817_Confidence_1.000_Length_221	74	.	G	C	137	PASS	DP=86;VDB=0.000873547;SGB=-6.87128;RPB=0.668964;MQB=0.989946;BQB=0.963321;MQ0F=0;ICB=0.5;HOB=0.5;AC=2;AN=4;DP4=32,0,16,0;MQ=31	GT:PL:DP:DV:SP:DP4	0/1:128,0,125:16:6:0:10,0,6,0	0/1:73,0,179:32:10:0:22,0,10,0
Locus_2_Transcript_1079/4817_Confidence_1.000_Length_446	115	.	T	A	75	PASS	DP=24;VDB=0.0576981;SGB=-4.09964;RPB=0.87319;MQB=0.546428;MQSB=0.307692;BQB=0.161524;MQ0F=0.0833333;ICB=0.5;HOB=0.5;AC=2;AN=4;DP4=7,1,6,1;MQ=35	GT:PL:DP:DV:SP:DP4	0/0:0,4,184:9:1:0:7,1,1,0	1/1:142,18,0:6:6:0:0,0,5,1
Locus_2_Transcript_1080/4817_Confidence_1.000_Length_444	184	.	G	T	72	PASS	DP=44;VDB=0.556941;SGB=6.07412;RPB=0.599677;MQB=0.572451;MQSB=0.523091;BQB=0.694442;MQ0F=0.0454545;ICB=0.3;HOB=0.125;AC=1;AN=4;DP4=14,4,11,0;MQ=36	GT:PL:DP:DV:SP:DP4	0/0:0,9,72:3:0:0:3,0,0,0	0/1:136,0,255:26:11:9:11,4,11,0
Locus_2_Transcript_1080/4817_Confidence_1.000_Length_444	296	.	T	G	70	PASS	DP=35;VDB=0.899328;SGB=-5.33677;RPB=0.79125;MQB=0.29607;MQSB=0.0608596;BQB=0.96323;MQ0F=0.342857;ICB=0.3;HOB=0.125;AC=3;AN=4;DP4=8,6,4,7;MQ=25	GT:PL:DP:DV:SP:DP4	1/1:75,15,0:5:5:0:0,0,2,3	0/1:60,0,218:20:6:2:8,6,2,4
Locus_2_Transcript_1081/4817_Confidence_1.000_Length_300	234	.	A	G	77	PASS	DP=55;VDB=0.0367208;SGB=11.6141;RPB=0.330055;MQB=0.614068;MQSB=0.26675;BQB=1;MQ0F=0.254545;ICB=0.3;HOB=0.125;AC=1;AN=4;DP4=9,9,9,10;MQ=15	GT:PL:DP:DV:SP:DP4	0/0:0,15,16:5:0:0:3,2,0,0	0/1:141,0,132:32:19:0:6,7,9,10
Locus_2_Transcript_1081/4817_Confidence_1.000_Length_300	240	.	G	C	69	PASS	DP=50;VDB=0.0351715;SGB=-6.87069;RPB=0.462564;MQB=0.227079;MQSB=0.135335;BQB=0.828915;MQ0F=0.2;ICB=0.3;HOB=0.125;AC=1;AN=4;DP4=6,13,9,7;MQ=15	GT:PL:DP:DV:SP:DP4	0/0:0,8,7:5:1:0:0,4,1,0	0/1:133,0,136:30:15:1:6,9,8,7
Locus_2_Transcript_1083/4817_Confidence_1.000_Length_207	53	.	C	T	151	PASS	DP=42;VDB=0.00905832;SGB=-1.12652;MQ0F=0.166667;AC=4;AN=4;DP4=0,0,26,0;MQ=14	GT:PL:DP:DV:SP:DP4	1/1:112,24,0:8:8:0:0,0,8,0	1/1:93,54,0:18:18:0:0,0,18,0
Locus_2_Transcript_1083/4817_Confidence_1.000_Length_207	133	.	T	G	118	PASS	DP=36;VDB=0.000476077;SGB=-1.18112;RPB=0.904762;MQB=0.166667;MQSB=0.006725;BQB=0.52381;MQ0F=0.138889;ICB=0.3;HOB=0.125;AC=3;AN=4;DP4=2,0,11,10;MQ=15	GT:PL:DP:DV:SP:DP4	1/1:122,21,0:7:7:0:0,0,5,2	0/1:60,0,15:16:14:3:2,0,6,8
Locus_2_Transcript_1083/4817_Confidence_1.000_Length_207	137	.	A	G	118	PASS	DP=36;VDB=0.000438327;SGB=-1.18112;RPB=0.880952;MQB=0.166667;MQSB=0.006725;BQB=0.428571;MQ0F=0.138889;ICB=0.3;HOB=0.125;AC=3;AN=4;DP4=2,0,11,10;MQ=15	GT:PL:DP:DV:SP:DP4	1/1:122,21,0:7:7:0:0,0,5,2	0/1:60,0,15:16:14:3:2,0,6,8
Locus_2_Transcript_1085/4817_Confidence_1.000_Length_275	213	.	C	G	107	PASS	DP=44;VDB=0.000366123;SGB=-0.0316985;RPB=0.981481;MQB=0.222222;MQSB=0.252779;BQB=0.481481;MQ0F=0.204545;ICB=0.3;HOB=0.125;AC=3;AN=4;DP4=2,0,13,14;MQ=12	GT:PL:DP:DV:SP:DP4	0/1:48,0,41:7:5:0:2,0,4,1	1/1:123,66,0:22:22:0:0,0,9,13
Locus_2_Transcript_1085/4817_Confidence_1.000_Length_275	215	.	T	C	80	PASS	DP=44;VDB=0.000203812;SGB=-0.171308;RPB=0.753752;MQB=0.133954;MQSB=0.252779;BQB=0.881931;MQ0F=0.204545;ICB=0.3;HOB=0.125;AC=3;AN=4;DP4=2,1,13,13;MQ=12	GT:PL:DP:DV:SP:DP4	0/1:48,0,41:7:5:0:2,0,4,1	1/1:96,40,0:22:21:0:0,1,9,12
Locus_2_Transcript_1087/4817_Confidence_1.000_Length_841	160	.	A	G	127	PASS	DP=35;VDB=0.250472;SGB=-5.95055;RPB=0.936543;MQB=0.994117;MQSB=1;BQB=0.407584;MQ0F=0.0285714;ICB=0.5;HOB=0.5;AC=2;AN=4;DP4=7,1,13,0;MQ=30	GT:PL:DP:DV:SP:DP4	0/1:83,0,42:6:4:0:1,1,4,0	0/1:108,0,104:15:9:0:6,0,9,0
Locus_2_Transcript_1087/4817_Confidence_1.000_Length_841	216	.	C	T	201	PASS	DP=42;VDB=0.0188555;SGB=-8.71237;RPB=0.373933;MQB=0.935249;MQSB=0.716059;BQB=0.787539;MQ0F=0.0238095;ICB=0.5;HOB=0.5;AC=2;AN=4;DP4=8,2,15,7;MQ=30	GT:PL:DP:DV:SP:DP4	0/1:56,0,48:4:2:0:1,1,0,2	0/1:209,0,86:28:20:2:7,1,15,5
Locus_2_Transcript_1087/4817_Confidence_1.000_Length_841	230	.	G	A	97	PASS	DP=41;VDB=0.00244027;SGB=-7.79174;RPB=0.0362979;MQB=0.998151;MQSB=0.937528;BQB=0.788467;MQ0F=0.0243902;ICB=0.5;HOB=0.5;AC=2;AN=4;DP4=10,2,11,8;MQ=28	GT:PL:DP:DV:SP:DP4	0/1:59,0,14:3:2:0:0,1,0,2	0/1:134,32,145:28:17:7:10,1,11,6
Locus_2_Transcript_1087/4817_Confidence_1.000_Length_841	237	.	A	G	282	PASS	DP=40;VDB=0.0904075;SGB=1.31847;RPB=0.173774;MQB=0.705554;MQSB=0.97543;BQB=0.922787;MQ0F=0.025;AC=4;AN=4;DP4=3,0,16,12;MQ=28	GT:PL:DP:DV:SP:DP4	1/1:83,9,0:3:3:0:0,0,0,3	1/1:254,5,0:28:25:3:3,0,16,9
Locus_2_Transcript_1087/4817_Confidence_1.000_Length_841	341	.	G	T	96	PASS	DP=29;VDB=0.559804;SGB=-6.5644;RPB=0.434598;MQB=0.0177152;MQSB=0.898944;BQB=0.84472;MQ0F=0.0689655;ICB=0.3;HOB=0.125;AC=3;AN=4;DP4=4,4,7,8;MQ=23	GT:PL:DP:DV:SP:DP4	1/1:72,15,0:5:5:0:0,0,3,2	0/1:88,0,172:18:10:0:4,4,4,6
Locus_2_Transcript_1087/4817_Confidence_1.000_Length_841	343	.	A	T	99	PASS	DP=29;VDB=0.556977;SGB=-6.5644;RPB=0.434598;MQB=0.0177152;MQSB=0.898944;BQB=0.84472;MQ0F=0.0689655;ICB=0.3;HOB=0.125;AC=3;AN=4;DP4=4,4,7,8;MQ=23	GT:PL:DP:DV:SP:DP4	1/1:72,15,0:5:5:0:0,0,3,2	0/1:91,0,172:18:10:0:4,4,4,6
Locus_2_Transcript_1087/4817_Confidence_1.000_Length_841	425	.	C	T	86	PASS	DP=61;VDB=0.740922;SGB=-6.25745;RPB=0.126132;MQB=0.00491104;MQSB=0.309155;BQB=0.749147;MQ0F=0;ICB=0.5;HOB=0.5;AC=2;AN=4;DP4=25,6,11,3;MQ=33	GT:PL:DP:DV:SP:DP4	0/1:33,0,76:7:4:0:3,0,4,0	0/1:118,0,255:38:10:2:22,6,7,3
Locus_2_Transcript_1087/4817_Confidence_1.000_Length_841	481	.	C	T	135	PASS	DP=83;VDB=0.189881;SGB=-6.25703;RPB=0.948734;MQB=0.240986;MQSB=0.0343992;BQB=0.505586;MQ0F=0;ICB=0.5;HOB=0.5;AC=2;AN=4;DP4=37,6,12,2;MQ=35	GT:PL:DP:DV:SP:DP4	0/1:53,0,126:7:2:0:5,0,2,0	0/1:147,0,254:50:12:0:32,6,10,2
Locus_2_Transcript_1087/4817_Confidence_1.000_Length_841	482	.	G	C	245	PASS	DP=82;VDB=0.700825;SGB=-12.3947;RPB=0.532689;MQB=0.00864779;MQSB=0.0995527;BQB=0.354835;MQ0F=0;ICB=0.5;HOB=0.5;AC=2;AN=4;DP4=20,3,29,5;MQ=36	GT:PL:DP:DV:SP:DP4	0/1:56,0,84:7:4:0:3,0,4,0	0/1:252,0,223:50:30:0:17,3,25,5
Locus_2_Transcript_1087/4817_Confidence_1.000_Length_841	634	.	C	T	284	PASS	DP=71;VDB=0.0207824;SGB=-10.5535;RPB=0.810478;MQB=0.000687322;MQSB=0.357867;BQB=0.989343;MQ0F=0;ICB=0.5;HOB=0.5;AC=2;AN=4;DP4=12,8,17,11;MQ=32	GT:PL:DP:DV:SP:DP4	0/1:110,0,79:10:7:3:3,0,4,3	0/1:237,0,255:38:21:1:9,8,13,8
Locus_2_Transcript_1087/4817_Confidence_1.000_Length_841	642	.	C	G	209	PASS	DP=71;VDB=0.00126406;SGB=-9.93983;RPB=0.0792652;MQB=0.00396605;MQSB=0.985592;BQB=0.819373;MQ0F=0;ICB=0.5;HOB=0.5;AC=2;AN=4;DP4=16,9,12,14;MQ=31	GT:PL:DP:DV:SP:DP4	0/1:58,0,147:10:5:3:3,2,1,4	0/1:215,0,255:41:21:3:13,7,11,10
Locus_2_Transcript_1087/4817_Confidence_1.000_Length_841	679	.	T	A	119	PASS	DP=69;VDB=0.223642;SGB=6.76576;RPB=0.502788;MQB=0.82551;MQSB=0.705391;BQB=0.761685;MQ0F=0;ICB=0.3;HOB=0.125;AC=1;AN=4;DP4=20,12,6,6;MQ=31	GT:PL:DP:DV:SP:DP4	0/0:0,21,183:7:0:0:4,3,0,0	0/1:183,0,255:37:12:3:16,9,6,6
Locus_2_Transcript_1087/4817_Confidence_1.000_Length_841	705	.	A	G	186	PASS	DP=44;VDB=0.0521723;SGB=-6.56424;RPB=0.844845;MQB=0.596698;MQSB=0.70778;BQB=0.982731;MQ0F=0;ICB=0.3;HOB=0.125;AC=3;AN=4;DP4=7,8,7,8;MQ=31	GT:PL:DP:DV:SP:DP4	1/1:85,5,0:4:3:0:1,0,1,2	0/1:164,0,246:26:12:0:6,8,6,6
Locus_2_Transcript_1087/4817_Confidence_1.000_Length_841	716	.	T	C	130	PASS	DP=44;VDB=0.42619;SGB=5.38303;RPB=0.506821;MQB=0.0730381;MQSB=0.659453;BQB=0.804333;MQ0F=0;ICB=0.3;HOB=0.125;AC=1;AN=4;DP4=11,9,4,6;MQ=31	GT:PL:DP:DV:SP:DP4	0/0:0,12,78:4:0:0:2,2,0,0	0/1:194,0,201:26:10:2:9,7,4,6
Locus_2_Transcript_1090/4817_Confidence_1.000_Length_445	39	.	T	C	67	PASS	DP=8;VDB=0.00671048;SGB=-0.826713;RPB=1;MQB=1;BQB=1;MQ0F=0;ICB=0.3;HOB=0.125;AC=3;AN=4;DP4=1,0,4,0;MQ=36	GT:PL:DP:DV:SP:DP4	1/1:100,9,0:3:3:0:0,0,3,0	0/1:31,0,18:2:1:0:1,0,1,0
Locus_2_Transcript_1090/4817_Confidence_1.000_Length_445	150	.	T	A	114	PASS	DP=69;VDB=0.00141038;SGB=-0.369985;RPB=0.673913;MQB=0.163043;MQSB=1;BQB=0.282609;MQ0F=0.275362;ICB=0.3;HOB=0.125;AC=3;AN=4;DP4=2,0,45,1;MQ=14	GT:PL:DP:DV:SP:DP4	0/1:24,1,10:12:11:0:1,0,11,0	1/1:153,66,0:36:35:0:1,0,34,1
Locus_2_Transcript_1090/4817_Confidence_1.000_Length_445	183	.	T	A	121	PASS	DP=97;VDB=0.0322959;SGB=-1.28512;RPB=0.7552;MQB=0.019422;MQSB=0.352854;BQB=0.155783;MQ0F=0.28866;ICB=0.3;HOB=0.125;AC=3;AN=4;DP4=8,1,51,2;MQ=14	GT:PL:DP:DV:SP:DP4	1/1:114,36,0:18:17:0:1,0,15,2	0/1:71,0,86:44:36:0:7,1,36,0
Locus_2_Transcript_1090/4817_Confidence_1.000_Length_445	275	.	C	T	74	PASS	DP=70;VDB=0.0732278;SGB=-13.0084;RPB=0.955279;MQB=0.101488;MQSB=0.90464;BQB=0.931008;MQ0F=0.414286;ICB=0.3;HOB=0.125;AC=3;AN=4;DP4=7,7,16,20;MQ=10	GT:PL:DP:DV:SP:DP4	1/1:37,23,0:11:10:0:1,0,3,7	0/1:101,0,79:39:26:0:6,7,13,13
Locus_2_Transcript_1092/4817_Confidence_1.000_Length_338	143	.	A	G	70	PASS	DP=56;VDB=0.00170737;SGB=-8.09871;RPB=0.322375;MQB=0.273758;MQSB=0.733131;BQB=0.871312;MQ0F=0.160714;ICB=0.5;HOB=0.5;AC=2;AN=4;DP4=12,2,15,5;MQ=16	GT:PL:DP:DV:SP:DP4	0/1:71,0,71:11:6:3:4,1,3,3	0/1:62,0,86:23:14:0:8,1,12,2
Locus_2_Transcript_1120/4817_Confidence_1.000_Length_1930	1198	.	C	T	202	PASS	DP=167;VDB=1.77914e-10;SGB=-13.3152;RPB=0.0805498;MQB=0.963216;MQSB=0.90365;BQB=0.999997;MQ0F=0.0359281;ICB=0.5;HOB=0.5;AC=2;AN=4;DP4=27,71,5,32;MQ=41	GT:PL:DP:DV:SP:DP4	0/1:43,0,255:40:5:4:17,18,1,4	0/1:225,0,255:95:32:1:10,53,4,28
Locus_2_Transcript_1120/4817_Confidence_1.000_Length_1930	1665	.	T	C	107	PASS	DP=228;VDB=0.867029;SGB=-14.2358;RPB=0.976319;MQB=0.000153595;MQSB=1.39119e-17;BQB=0.863461;MQ0F=0.0131579;ICB=0.3;HOB=0.125;AC=1;AN=4;DP4=89,42,31,9;MQ=30	GT:PL:DP:DV:SP:DP4	0/1:171,0,255:62:24:1:25,13,17,7	0/0:0,57,255:109:16:8:64,29,14,2
Locus_2_Transcript_1147/4817_Confidence_1.000_Length_649	301	.	G	A	61	PASS	DP=51;VDB=0.622626;SGB=4.69269;RPB=0.28117;MQB=0.537025;MQSB=0.654713;BQB=0.579686;MQ0F=0.333333;ICB=0.3;HOB=0.125;AC=1;AN=4;DP4=23,5,5,4;MQ=22	GT:PL:DP:DV:SP:DP4	0/0:0,18,97:6:0:0:5,1,0,0	0/1:125,0,187:31:9:7:18,4,5,4
Locus_2_Transcript_1148/4817_Confidence_1.000_Length_412	319	.	G	T	118	PASS	DP=15;VDB=0.00746206;SGB=-0.592404;RPB=1;MQB=1;MQSB=0.974597;BQB=1;MQ0F=0;ICB=0.3;HOB=0.125;AC=3;AN=4;DP4=1,0,3,5;MQ=34	GT:PL:DP:DV:SP:DP4	1/1:23,3,0:1:1:0:0,0,1,0	0/1:160,0,18:8:7:0:1,0,2,5
Locus_2_Transcript_1156/4817_Confidence_1.000_Length_216	69	.	G	C	85	PASS	DP=44;VDB=0.00461629;SGB=8.15014;RPB=0.199518;MQB=0.0100599;BQB=0.844049;MQ0F=0;ICB=0.3;HOB=0.125;AC=1;AN=4;DP4=13,0,14,0;MQ=32	GT:PL:DP:DV:SP:DP4	0/0:0,18,142:6:0:0:6,0,0,0	0/1:149,0,114:21:14:0:7,0,14,0
Locus_2_Transcript_1156/4817_Confidence_1.000_Length_216	93	.	A	G	225	PASS	DP=54;VDB=0.111796;SGB=-8.40556;RPB=0.857041;MQB=0.225514;BQB=0.980515;MQ0F=0;ICB=0.5;HOB=0.5;AC=2;AN=4;DP4=11,0,21,0;MQ=33	GT:PL:DP:DV:SP:DP4	0/1:139,0,64:9:6:0:3,0,6,0	0/1:150,0,128:23:15:0:8,0,15,0
Locus_2_Transcript_1157/4817_Confidence_1.000_Length_567	176	.	A	G	84	PASS	DP=18;VDB=0.163924;SGB=-1.05859;RPB=0.472367;MQB=0.309786;BQB=0.152558;MQ0F=0.222222;ICB=0.5;HOB=0.5;AC=2;AN=4;DP4=3,0,8,0;MQ=33	GT:PL:DP:DV:SP:DP4	0/1:130,0,19:6:5:0:1,0,5,0	0/1:18,0,45:5:3:0:2,0,3,0
Locus_2_Transcript_1157/4817_Confidence_1.000_Length_567	309	.	G	A	150	PASS	DP=29;VDB=0.977821;SGB=-5.95064;RPB=0.785309;MQB=0.966585;MQSB=0.377103;BQB=0.999581;MQ0F=0.0689655;ICB=0.5;HOB=0.5;AC=2;AN=4;DP4=10,1,11,2;MQ=34	GT:PL:DP:DV:SP:DP4	0/1:75,0,53:7:5:0:1,1,3,2	0/1:139,0,130:17:8:0:9,0,8,0
Locus_2_Transcript_1157/4817_Confidence_1.000_Length_567	478	.	C	G	125	PASS	DP=17;VDB=0.0522394;SGB=-0.827256;RPB=0.207131;MQB=1;MQSB=0.314383;BQB=0.997028;MQ0F=0.117647;ICB=0.5;HOB=0.5;AC=2;AN=4;DP4=1,3,2,7;MQ=38	GT:PL:DP:DV:SP:DP4	0/1:29,0,67:4:2:0:1,1,1,1	0/1:160,0,42:9:7:0:0,2,1,6
Locus_2_Transcript_1159/4817_Confidence_1.000_Length_208	14	.	C	T	72	PASS	DP=43;VDB=4.86988e-07;SGB=-6.87126;RPB=0.414223;MQB=0.782965;BQB=0.398652;MQ0F=0.0465116;ICB=0.5;HOB=0.5;AC=2;AN=4;DP4=23,0,16,0;MQ=24	GT:PL:DP:DV:SP:DP4	0/1:17,0,124:19:5:0:14,0,5,0	0/1:119,0,99:20:11:0:9,0,11,0
Locus_2_Transcript_1159/4817_Confidence_1.000_Length_208	76	.	A	G	61	PASS	DP=193;VDB=0.0503681;SGB=-10.5535;RPB=0.203022;MQB=0.0254815;BQB=0.0319537;MQ0F=0.0103627;ICB=0.5;HOB=0.5;AC=2;AN=4;DP4=83,0,28,0;MQ=28	GT:PL:DP:DV:SP:DP4	0/1:64,0,166:50:14:0:36,0,14,0	0/1:64,0,162:61:14:0:47,0,14,0
Locus_2_Transcript_1159/4817_Confidence_1.000_Length_208	90	.	A	G	261	PASS	DP=226;VDB=2.68383e-05;SGB=-23.7482;RPB=0.320085;MQB=0.265152;BQB=0.180706;MQ0F=0.00884956;ICB=0.5;HOB=0.5;AC=2;AN=4;DP4=46,0,71,0;MQ=27	GT:PL:DP:DV:SP:DP4	0/1:152,0,159:54:31:0:23,0,31,0	0/1:173,0,156:63:40:0:23,0,40,0
Locus_2_Transcript_1159/4817_Confidence_1.000_Length_208	131	.	A	G	328	PASS	DP=203;VDB=3.31505e-06;SGB=-15.77;RPB=0.133021;MQB=0.554516;MQSB=0.0472092;BQB=0.265962;MQ0F=0.00985222;ICB=0.5;HOB=0.5;AC=2;AN=4;DP4=55,15,33,12;MQ=27	GT:PL:DP:DV:SP:DP4	0/1:187,0,231:52:21:3:21,10,16,5	0/1:205,0,244:63:24:7:34,5,17,7
Locus_2_Transcript_1159/4817_Confidence_1.000_Length_208	133	.	C	T	335	PASS	DP=198;VDB=1.35073e-05;SGB=-15.77;RPB=0.947158;MQB=0.554516;MQSB=0.157643;BQB=0.16636;MQ0F=0.010101;ICB=0.5;HOB=0.5;AC=2;AN=4;DP4=55,15,28,17;MQ=27	GT:PL:DP:DV:SP:DP4	0/1:183,0,231:52:21:3:21,10,16,5	0/1:216,0,244:63:24:26:34,5,12,12
Locus_2_Transcript_1159/4817_Confidence_1.000_Length_208	134	.	G	A	112	PASS	DP=196;VDB=6.02731e-06;SGB=-9.93983;RPB=0.216855;MQB=0.31928;MQSB=0.297689;BQB=0.766767;MQ0F=0.0102041;ICB=0.5;HOB=0.5;AC=2;AN=4;DP4=61,28,20,6;MQ=27	GT:PL:DP:DV:SP:DP4	0/1:67,0,247:52:11:6:31,10,6,5	0/1:111,0,255:63:15:16:30,18,14,1
Locus_2_Transcript_1159/4817_Confidence_1.000_Length_208	142	.	G	A	443	PASS	DP=180;VDB=4.78834e-10;SGB=-1.38627;RPB=0.721442;MQB=0.2216;MQSB=0.956672;BQB=0.309955;MQ0F=0.0111111;ICB=0.5;HOB=0.5;AC=2;AN=4;DP4=16,9,49,40;MQ=27	GT:PL:DP:DV:SP:DP4	0/1:255,0,82:52:39:0:8,5,22,17	0/1:255,0,69:62:50:3:8,4,27,23
Locus_2_Transcript_1159/4817_Confidence_1.000_Length_208	144	.	G	A	446	PASS	DP=178;VDB=1.04966e-10;SGB=-21.6002;RPB=0.998323;MQB=0.989977;MQSB=0.988719;BQB=0.0429966;MQ0F=0.011236;ICB=0.5;HOB=0.5;AC=2;AN=4;DP4=33,16,31,33;MQ=27	GT:PL:DP:DV:SP:DP4	0/1:255,0,156:51:32:14:15,4,15,17	0/1:255,0,255:62:32:3:18,12,16,16
Locus_2_Transcript_1161/4817_Confidence_1.000_Length_208	44	.	A	G	306	PASS	DP=346;VDB=4.46407e-32;SGB=-49.217;RPB=0.318627;MQB=1.02306e-19;BQB=0.964713;MQ0F=0.0520231;ICB=0.5;HOB=0.5;AC=2;AN=4;DP4=111,0,154,0;MQ=26	GT:PL:DP:DV:SP:DP4	0/1:178,0,94:114:59:0:55,0,59,0	0/1:194,0,105:151:95:0:56,0,95,0
Locus_2_Transcript_1161/4817_Confidence_1.000_Length_208	88	.	A	G	150	PASS	DP=638;VDB=5.15385e-29;SGB=-1.38629;RPB=0.323475;MQB=1.29346e-06;MQSB=1;BQB=0.844932;MQ0F=0.0595611;ICB=0.3;HOB=0.125;AC=3;AN=4;DP4=52,0,279,1;MQ=26	GT:PL:DP:DV:SP:DP4	1/1:99,118,0:142:129:0:13,0,129,0	0/1:114,0,12:190:151:0:39,0,150,1
Locus_2_Transcript_1161/4817_Confidence_1.000_Length_208	117	.	C	T	69	PASS	DP=625;VDB=1.92897e-07;SGB=-25.2825;RPB=0.0400555;MQB=0.231023;MQSB=8.75939e-07;BQB=0.69875;MQ0F=0.0544;ICB=0.5;HOB=0.5;AC=2;AN=4;DP4=229,26,65,11;MQ=26	GT:PL:DP:DV:SP:DP4	0/1:84,0,144:141:31:19:101,9,23,8	0/1:50,0,251:190:45:4:128,17,42,3
Locus_2_Transcript_1161/4817_Confidence_1.000_Length_208	197	.	A	C	170	PASS	DP=116;VDB=1.10819e-33;SGB=-17.6112;RPB=0.926373;MQB=1.31409e-05;MQSB=0.979579;BQB=0.247895;MQ0F=0.0603448;ICB=0.5;HOB=0.5;AC=2;AN=4;DP4=3,51,2,49;MQ=27	GT:PL:DP:DV:SP:DP4	0/1:100,0,162:41:22:0:1,18,2,20	0/1:134,0,213:64:29:3:2,33,0,29
Locus_2_Transcript_1162/4817_Confidence_1.000_Length_233	92	.	T	C	140	PASS	DP=434;VDB=4.2844e-05;SGB=-42.1594;RPB=0.00219661;MQB=9.82286e-16;MQSB=0.941509;BQB=0.997459;MQ0F=0.0760369;ICB=0.5;HOB=0.5;AC=2;AN=4;DP4=134,2,131,0;MQ=22	GT:PL:DP:DV:SP:DP4	0/1:55,0,188:98:49:0:48,1,49,0	0/1:150,0,220:169:82:0:86,1,82,0
Locus_2_Transcript_1162/4817_Confidence_1.000_Length_233	115	.	A	C	136	PASS	DP=511;VDB=0.000132404;SGB=-43.6936;RPB=0.121432;MQB=9.33831e-29;MQSB=0.00419317;BQB=0.713237;MQ0F=0.0626223;ICB=0.5;HOB=0.5;AC=2;AN=4;DP4=126,21,115,21;MQ=23	GT:PL:DP:DV:SP:DP4	0/1:110,0,171:106:66:16:40,0,58,8	0/1:91,0,255:177:70:0:86,21,57,13
Locus_2_Transcript_1162/4817_Confidence_1.000_Length_233	116	.	G	A	212	PASS	DP=514;VDB=0.000341351;SGB=-50.1376;RPB=0.0225973;MQB=4.44644e-30;MQSB=0.000471067;BQB=0.501736;MQ0F=0.0622568;ICB=0.5;HOB=0.5;AC=2;AN=4;DP4=105,20,136,21;MQ=23	GT:PL:DP:DV:SP:DP4	0/1:101,0,161:107:71:6:35,1,63,8	0/1:175,0,255:175:86:5:70,19,73,13
Locus_2_Transcript_1162/4817_Confidence_1.000_Length_233	117	.	A	G	137	PASS	DP=511;VDB=0.000145696;SGB=-43.3868;RPB=0.167756;MQB=4.06346e-29;MQSB=0.000558958;BQB=0.743069;MQ0F=0.0626223;ICB=0.5;HOB=0.5;AC=2;AN=4;DP4=124,22,114,21;MQ=23	GT:PL:DP:DV:SP:DP4	0/1:110,0,175:106:66:8:39,1,58,8	0/1:92,0,255:175:69:0:85,21,56,13
Locus_2_Transcript_1162/4817_Confidence_1.000_Length_233	218	.	C	A	85	PASS	DP=126;VDB=1.45141e-14;SGB=-14.8495;RPB=0.932795;MQB=0.176618;MQSB=0.142081;BQB=0.887934;MQ0F=0.0714286;ICB=0.5;HOB=0.5;AC=2;AN=4;DP4=7,65,2,40;MQ=24	GT:PL:DP:DV:SP:DP4	0/1:38,0,215:45:20:0:2,23,1,19	0/1:112,0,145:69:22:2:5,42,1,21
Locus_2_Transcript_1172/4817_Confidence_1.000_Length_739	151	.	A	G	108	PASS	DP=32;VDB=0.828364;SGB=5.38303;RPB=0.357364;MQB=0.714623;MQSB=0;BQB=0.0787876;MQ0F=0;ICB=0.3;HOB=0.125;AC=1;AN=4;DP4=14,0,8,2;MQ=40	GT:PL:DP:DV:SP:DP4	0/0:0,24,175:8:0:0:8,0,0,0	0/1:172,0,125:16:10:3:6,0,8,2
Locus_2_Transcript_1172/4817_Confidence_1.000_Length_739	324	.	C	G	239	PASS	DP=23;VDB=0.21864;SGB=-1.20015;RPB=0.513417;MQB=0.91051;MQSB=0.872525;BQB=0.556584;MQ0F=0;ICB=0.3;HOB=0.125;AC=3;AN=4;DP4=2,1,9,3;MQ=40	GT:PL:DP:DV:SP:DP4	1/1:156,21,0:7:7:0:0,0,7,0	0/1:147,0,81:8:5:0:2,1,2,3
Locus_2_Transcript_1172/4817_Confidence_1.000_Length_739	325	.	T	C	183	PASS	DP=23;VDB=0.0112864;SGB=-5.02916;RPB=0.0497871;MQB=0.829029;MQSB=0.872525;BQB=0.309786;MQ0F=0;ICB=0.3;HOB=0.125;AC=3;AN=4;DP4=2,3,9,1;MQ=40	GT:PL:DP:DV:SP:DP4	1/1:156,21,0:7:7:0:0,0,7,0	0/1:91,0,139:8:3:0:2,3,2,1
Locus_2_Transcript_1172/4817_Confidence_1.000_Length_739	422	.	G	A	84	PASS	DP=48;VDB=0.295648;SGB=-4.41425;RPB=0.770381;MQB=0.151955;MQSB=0.997191;BQB=0.718807;MQ0F=0;ICB=0.5;HOB=0.5;AC=2;AN=4;DP4=19,4,6,2;MQ=40	GT:PL:DP:DV:SP:DP4	0/1:54,0,212:15:3:4:11,1,2,1	0/1:96,0,237:16:5:0:8,3,4,1
Locus_2_Transcript_1172/4817_Confidence_1.000_Length_739	425	.	G	C	63	PASS	DP=49;VDB=0.297712;SGB=-4.41425;RPB=0.71045;MQB=0.146957;MQSB=0.995349;BQB=0.748257;MQ0F=0;ICB=0.5;HOB=0.5;AC=2;AN=4;DP4=20,4,6,2;MQ=40	GT:PL:DP:DV:SP:DP4	0/1:51,0,215:16:3:5:12,1,2,1	0/1:79,0,236:16:5:0:8,3,4,1
Locus_2_Transcript_1172/4817_Confidence_1.000_Length_739	530	.	T	C	112	PASS	DP=31;VDB=0.293704;SGB=-4.10417;RPB=0.593119;MQB=0.885379;MQSB=0.986161;BQB=0.760398;MQ0F=0;ICB=0.5;HOB=0.5;AC=2;AN=4;DP4=10,5,3,4;MQ=39	GT:PL:DP:DV:SP:DP4	0/1:56,0,61:4:2:5:2,0,0,2	0/1:120,0,244:18:5:0:8,5,3,2
Locus_2_Transcript_1173/4817_Confidence_1.000_Length_814	166	.	G	A	61	PASS	DP=18;VDB=0.602287;SGB=-3.78882;RPB=0.499352;MQB=0.868815;MQSB=0.687289;BQB=0.209611;MQ0F=0;ICB=0.5;HOB=0.5;AC=2;AN=4;DP4=8,1,4,2;MQ=40	GT:PL:DP:DV:SP:DP4	0/1:15,0,81:4:1:0:3,0,1,0	0/1:111,0,153:11:5:3:5,1,3,2
Locus_2_Transcript_1173/4817_Confidence_1.000_Length_814	360	.	T	C	120	PASS	DP=22;VDB=0.886988;SGB=-1.20015;RPB=0.91051;MQB=0.687289;MQSB=0.230769;BQB=0.149803;MQ0F=0;ICB=0.5;HOB=0.5;AC=2;AN=4;DP4=3,0,10,2;MQ=30	GT:PL:DP:DV:SP:DP4	0/1:96,0,42:9:7:0:2,0,7,0	0/1:89,0,24:6:5:0:1,0,3,2
Locus_2_Transcript_1173/4817_Confidence_1.000_Length_814	425	.	A	G	189	PASS	DP=21;VDB=0.621197;SGB=-5.95067;RPB=0.612271;MQB=0.25042;MQSB=0.86813;BQB=0.753249;MQ0F=0;ICB=0.5;HOB=0.5;AC=2;AN=4;DP4=2,5,9,4;MQ=35	GT:PL:DP:DV:SP:DP4	0/1:92,0,89:10:6:11:0,4,4,2	0/1:161,0,80:10:7:0:2,1,5,2
Locus_2_Transcript_1173/4817_Confidence_1.000_Length_814	522	.	C	A	66	PASS	DP=21;VDB=0.308783;SGB=3.31571;RPB=0.995249;MQB=0.010294;MQSB=0.156946;BQB=0.865847;MQ0F=0;ICB=0.3;HOB=0.125;AC=1;AN=4;DP4=6,4,2,5;MQ=36	GT:PL:DP:DV:SP:DP4	0/1:130,0,80:10:7:3:2,1,2,5	0/0:0,21,194:7:0:0:4,3,0,0
Locus_2_Transcript_1173/4817_Confidence_1.000_Length_814	595	.	T	C	251	PASS	DP=23;VDB=0.274834;SGB=-1.20015;RPB=0.288619;MQB=0.861658;MQSB=0.998531;BQB=0.998163;MQ0F=0;ICB=0.5;HOB=0.5;AC=2;AN=4;DP4=3,1,7,5;MQ=37	GT:PL:DP:DV:SP:DP4	0/1:133,0,19:6:5:0:1,0,3,2	0/1:185,0,44:10:7:0:2,1,4,3
Locus_2_Transcript_1173/4817_Confidence_1.000_Length_814	608	.	C	T	67	PASS	DP=22;VDB=0.178985;SGB=-3.47587;RPB=0.184981;MQB=0.912219;MQSB=0.711573;BQB=0.829029;MQ0F=0;ICB=0.5;HOB=0.5;AC=2;AN=4;DP4=7,3,2,3;MQ=38	GT:PL:DP:DV:SP:DP4	0/1:22,0,112:5:1:0:3,1,0,1	0/1:110,0,139:10:4:0:4,2,2,2
Locus_2_Transcript_1173/4817_Confidence_1.000_Length_814	609	.	A	T	67	PASS	DP=22;VDB=0.184963;SGB=-3.47587;RPB=0.184981;MQB=0.912219;MQSB=0.711573;BQB=0.692463;MQ0F=0;ICB=0.5;HOB=0.5;AC=2;AN=4;DP4=7,3,2,3;MQ=38	GT:PL:DP:DV:SP:DP4	0/1:22,0,121:5:1:0:3,1,0,1	0/1:110,0,139:10:4:0:4,2,2,2
Locus_2_Transcript_1173/4817_Confidence_1.000_Length_814	623	.	C	T	81	PASS	DP=24;VDB=0.921138;SGB=-4.10417;RPB=0.983729;MQB=0.995907;MQSB=0.975928;BQB=0.0770557;MQ0F=0;ICB=0.5;HOB=0.5;AC=2;AN=4;DP4=8,3,1,6;MQ=39	GT:PL:DP:DV:SP:DP4	0/1:48,0,132:7:2:8:4,1,0,2	0/1:97,0,141:11:5:6:4,2,1,4
Locus_2_Transcript_1173/4817_Confidence_1.000_Length_814	732	.	G	A	63	PASS	DP=18;VDB=0.491115;SGB=-3.15886;RPB=0.89338;MQB=0.487298;MQSB=0.649731;BQB=0.649731;MQ0F=0;ICB=0.5;HOB=0.5;AC=2;AN=4;DP4=2,3,3,1;MQ=41	GT:PL:DP:DV:SP:DP4	0/1:101,0,23:4:3:0:0,1,2,1	0/1:25,0,130:5:1:0:2,2,1,0
Locus_2_Transcript_1174/4817_Confidence_1.000_Length_561	116	.	C	A	74	PASS	DP=19;VDB=0.203362;SGB=2.63044;RPB=0.950952;MQB=0.950952;BQB=0.891517;MQ0F=0;ICB=1;HOB=0.5;AC=1;AN=2;DP4=5,0,6,0;MQ=42	GT:PL:DP:DV:SP:DP4	./.:0,0,0:0:0:0:0,0,0,0	0/1:134,0,121:11:6:0:5,0,6,0
Locus_2_Transcript_1174/4817_Confidence_1.000_Length_561	355	.	T	C	65	PASS	DP=28;VDB=0.0773866;SGB=-4.10598;RPB=0.496585;MQB=0.0018363;MQSB=0.502047;BQB=0.207008;MQ0F=0;ICB=0.5;HOB=0.5;AC=2;AN=4;DP4=9,3,7,0;MQ=37	GT:PL:DP:DV:SP:DP4	0/1:78,0,25:4:3:0:1,0,3,0	0/1:50,0,234:15:4:3:8,3,4,0
Locus_2_Transcript_1174/4817_Confidence_1.000_Length_561	371	.	A	T	67	PASS	DP=31;VDB=0.075316;SGB=-4.10598;RPB=0.683926;MQB=0.00150344;MQSB=0.851535;BQB=0.540433;MQ0F=0;ICB=0.5;HOB=0.5;AC=2;AN=4;DP4=10,3,6,1;MQ=38	GT:PL:DP:DV:SP:DP4	0/1:78,0,25:4:3:0:1,0,3,0	0/1:52,0,251:16:4:0:9,3,3,1
Locus_2_Transcript_1181/4817_Confidence_1.000_Length_477	188	.	C	G	85	PASS	DP=19;VDB=0.112445;SGB=3.31571;RPB=0.331306;MQB=0.896474;MQSB=0.5;BQB=0.194886;MQ0F=0;ICB=1;HOB=0.5;AC=1;AN=2;DP4=5,0,5,2;MQ=40	GT:PL:DP:DV:SP:DP4	./.:0,0,0:0:0:0:0,0,0,0	0/1:145,0,118:12:7:3:5,0,5,2
Locus_2_Transcript_1181/4817_Confidence_1.000_Length_477	314	.	C	T	162	PASS	DP=35;VDB=0.0105501;SGB=-5.95055;RPB=0.95891;MQB=0.0192965;MQSB=0.102932;BQB=0.909914;MQ0F=0;ICB=0.3;HOB=0.125;AC=3;AN=4;DP4=8,3,11,2;MQ=34	GT:PL:DP:DV:SP:DP4	1/1:72,12,0:4:4:0:0,0,4,0	0/1:154,0,221:20:9:0:8,3,7,2
Locus_2_Transcript_1181/4817_Confidence_1.000_Length_477	327	.	G	A	121	PASS	DP=33;VDB=0.0927163;SGB=-5.02958;RPB=0.467995;MQB=0.488445;MQSB=0.25284;BQB=0.760829;MQ0F=0;ICB=0.3;HOB=0.125;AC=3;AN=4;DP4=9,2,9,1;MQ=34	GT:PL:DP:DV:SP:DP4	1/1:72,12,0:4:4:0:0,0,4,0	0/1:113,0,214:17:6:0:9,2,5,1
Locus_2_Transcript_1181/4817_Confidence_1.000_Length_477	386	.	A	G	108	PASS	DP=35;VDB=1.09165e-05;SGB=-5.02958;RPB=0.0962474;MQB=0.0667034;MQSB=0.945303;BQB=0.229925;MQ0F=0;ICB=0.3;HOB=0.125;AC=3;AN=4;DP4=6,3,10,0;MQ=33	GT:PL:DP:DV:SP:DP4	1/1:72,12,0:4:4:0:0,0,4,0	0/1:100,0,207:15:6:6:6,3,6,0
Locus_2_Transcript_1184/4817_Confidence_1.000_Length_690	67	.	G	A	126	PASS	DP=179;VDB=0.00013082;SGB=-15.4632;RPB=0.1036;MQB=0.819473;BQB=0.891518;MQ0F=0.0670391;ICB=0.5;HOB=0.5;AC=2;AN=4;DP4=100,0,44,0;MQ=34	GT:PL:DP:DV:SP:DP4	0/1:14,0,116:66:8:0:58,0,8,0	0/1:176,0,167:78:36:0:42,0,36,0
Locus_2_Transcript_1184/4817_Confidence_1.000_Length_690	146	.	G	A	109	PASS	DP=363;VDB=0.024465;SGB=-18.8386;RPB=0.40556;MQB=0.610372;MQSB=0.0830909;BQB=0.315042;MQ0F=0.0330578;ICB=0.3;HOB=0.125;AC=1;AN=4;DP4=178,30,52,3;MQ=38	GT:PL:DP:DV:SP:DP4	0/0:0,81,255:122:10:0:95,17,9,1	0/1:173,0,255:141:45:8:83,13,43,2
Locus_2_Transcript_1184/4817_Confidence_1.000_Length_690	212	.	G	A	204	PASS	DP=442;VDB=0.657639;SGB=-35.7155;RPB=0.454625;MQB=0.763496;MQSB=0.864067;BQB=0.987553;MQ0F=0.00904977;ICB=0.5;HOB=0.5;AC=2;AN=4;DP4=126,75,76,34;MQ=40	GT:PL:DP:DV:SP:DP4	0/1:255,0,255:157:92:3:49,16,64,28	0/1:13,0,255:154:18:3:77,59,12,6
Locus_2_Transcript_1184/4817_Confidence_1.000_Length_690	274	.	T	C	248	PASS	DP=415;VDB=0.00311781;SGB=-20.9865;RPB=0.463182;MQB=0.0558268;MQSB=0.0210207;BQB=0.292409;MQ0F=0.00240964;ICB=0.5;HOB=0.5;AC=2;AN=4;DP4=132,111,45,17;MQ=38	GT:PL:DP:DV:SP:DP4	0/1:159,0,255:169:35:8:81,53,26,9	0/1:156,0,255:136:27:15:51,58,19,8
Locus_2_Transcript_1184/4817_Confidence_1.000_Length_690	352	.	A	G	239	PASS	DP=258;VDB=0.321602;SGB=-21.6002;RPB=0.954669;MQB=8.3088e-09;MQSB=1.38843e-14;BQB=0.495887;MQ0F=0.0155039;ICB=0.5;HOB=0.5;AC=2;AN=4;DP4=56,74,37,27;MQ=34	GT:PL:DP:DV:SP:DP4	0/1:49,0,255:109:19:5:30,60,9,10	0/1:255,0,255:85:45:1:26,14,28,17
Locus_2_Transcript_1184/4817_Confidence_1.000_Length_690	529	.	T	C	211	PASS	DP=231;VDB=0.636869;SGB=-21.2934;RPB=0.983209;MQB=7.83086e-07;MQSB=0.248384;BQB=0.954051;MQ0F=0;ICB=0.5;HOB=0.5;AC=2;AN=4;DP4=66,34,39,24;MQ=32	GT:PL:DP:DV:SP:DP4	0/1:21,0,255:80:12:0:44,24,8,4	0/1:255,0,255:83:51:3:22,10,31,20
Locus_2_Transcript_1191/4817_Confidence_1.000_Length_207	65	.	A	T	225	PASS	DP=245;VDB=1.2825e-06;SGB=-1.38629;RPB=0.852536;MQB=0.808314;BQB=0.609871;MQ0F=0.0938776;AC=4;AN=4;DP4=16,0,155,0;MQ=21	GT:PL:DP:DV:SP:DP4	1/1:108,91,0:105:95:0:10,0,95,0	1/1:172,116,0:66:60:0:6,0,60,0
Locus_2_Transcript_1191/4817_Confidence_1.000_Length_207	74	.	T	G	145	PASS	DP=292;VDB=0.000753934;SGB=-1.38629;RPB=0.39133;MQB=0.912526;BQB=0.719674;MQ0F=0.0787671;ICB=0.5;HOB=0.5;AC=2;AN=4;DP4=41,0,156,0;MQ=22	GT:PL:DP:DV:SP:DP4	0/1:100,0,34:117:93:0:24,0,93,0	0/1:111,0,22:80:63:0:17,0,63,0
Locus_2_Transcript_1191/4817_Confidence_1.000_Length_207	76	.	T	G	94	PASS	DP=298;VDB=0.00998567;SGB=-19.1454;RPB=0.556147;MQB=0.990068;BQB=0.581253;MQ0F=0.0771812;ICB=0.5;HOB=0.5;AC=2;AN=4;DP4=141,0,56,0;MQ=22	GT:PL:DP:DV:SP:DP4	0/1:114,0,139:117:36:0:81,0,36,0	0/1:45,0,125:80:20:0:60,0,20,0
Locus_2_Transcript_1191/4817_Confidence_1.000_Length_207	80	.	A	G	127	PASS	DP=333;VDB=0.000506716;SGB=-23.4414;RPB=0.210835;MQB=0.607975;MQSB=1;BQB=0.842921;MQ0F=0.0690691;ICB=0.5;HOB=0.5;AC=2;AN=4;DP4=142,1,70,0;MQ=22	GT:PL:DP:DV:SP:DP4	0/1:85,0,158:124:34:0:89,1,34,0	0/1:107,0,165:89:36:0:53,0,36,0
Locus_2_Transcript_1194/4817_Confidence_1.000_Length_280	185	.	T	G	70	PASS	DP=26;VDB=0.778312;SGB=-3.47587;RPB=0.945959;MQB=0.606531;MQSB=0.75;BQB=0.800737;MQ0F=0;ICB=0.5;HOB=0.5;AC=2;AN=4;DP4=7,2,5,0;MQ=40	GT:PL:DP:DV:SP:DP4	0/1:107,0,120:9:4:0:5,0,4,0	0/1:27,0,126:5:1:0:2,2,1,0
Locus_2_Transcript_1195/4817_Confidence_1.000_Length_657	402	.	T	C	130	PASS	DP=31;VDB=0.104038;SGB=-4.41269;RPB=0.407584;MQB=0.685489;MQSB=0.984341;BQB=0.845496;MQ0F=0;ICB=0.5;HOB=0.5;AC=2;AN=4;DP4=7,6,5,3;MQ=37	GT:PL:DP:DV:SP:DP4	0/1:53,0,67:5:2:4:2,1,0,2	0/1:141,0,212:16:6:5:5,5,5,1
Locus_2_Transcript_1204/4817_Confidence_1.000_Length_219	72	.	A	G	84	PASS	DP=120;VDB=2.86396e-14;SGB=-1.3861;RPB=1;MQB=1;BQB=1;MQ0F=0.525;AC=4;AN=4;DP4=1,0,67,0;MQ=6	GT:PL:DP:DV:SP:DP4	1/1:57,90,0:30:30:0:0,0,30,0	1/1:82,92,0:38:37:0:1,0,37,0
Locus_2_Transcript_1204/4817_Confidence_1.000_Length_219	100	.	A	G	97	PASS	DP=136;VDB=2.14462e-13;SGB=-1.38619;RPB=0.231343;MQB=0.30597;MQSB=1;BQB=0.865672;MQ0F=0.485294;AC=4;AN=4;DP4=2,0,66,1;MQ=6	GT:PL:DP:DV:SP:DP4	1/1:63,93,0:31:31:0:0,0,31,0	1/1:89,76,0:38:36:0:2,0,35,1
Locus_2_Transcript_1204/4817_Confidence_1.000_Length_219	159	.	C	A	159	PASS	DP=67;VDB=3.03792e-05;SGB=-1.36622;RPB=1;MQB=1;MQSB=0.999059;BQB=1;MQ0F=0.432836;AC=4;AN=4;DP4=1,0,14,34;MQ=8	GT:PL:DP:DV:SP:DP4	1/1:68,51,0:18:18:0:0,0,5,13	1/1:145,73,0:31:30:0:1,0,9,21
Locus_2_Transcript_1207/4817_Confidence_1.000_Length_422	54	.	A	G	256	PASS	DP=603;VDB=4.27056e-40;SGB=-1.38629;RPB=0.272199;MQB=8.89259e-07;BQB=0.384813;MQ0F=0.0066335;AC=4;AN=4;DP4=99,0,433,0;MQ=37	GT:PL:DP:DV:SP:DP4	1/1:148,42,0:302:240:0:62,0,240,0	1/1:164,126,0:230:193:0:37,0,193,0
Locus_2_Transcript_1207/4817_Confidence_1.000_Length_422	101	.	A	C	420	PASS	DP=1409;VDB=0.000335886;SGB=-1.38629;RPB=0.66332;MQB=0.000335832;MQSB=1;BQB=0.0931639;MQ0F=0.00283889;AC=4;AN=4;DP4=123,0,876,1;MQ=39	GT:PL:DP:DV:SP:DP4	1/1:242,217,0:583:501:0:82,0,500,1	1/1:233,255,0:417:376:0:41,0,376,0
Locus_2_Transcript_1207/4817_Confidence_1.000_Length_422	289	.	G	A	410	PASS	DP=832;VDB=1;SGB=-71.6172;RPB=0.98142;MQB=1.88145e-09;MQSB=0.0863262;BQB=0.0117932;MQ0F=0.00120192;ICB=0.5;HOB=0.5;AC=2;AN=4;DP4=236,169,114,113;MQ=37	GT:PL:DP:DV:SP:DP4	0/1:255,0,255:358:138:3:121,99,70,68	0/1:220,0,255:274:89:13:115,70,44,45
Locus_2_Transcript_1207/4817_Confidence_1.000_Length_422	291	.	G	A	438	PASS	DP=871;VDB=0.999999;SGB=-73.1515;RPB=0.243239;MQB=1.67694e-09;MQSB=0.0310411;BQB=0.00083409;MQ0F=0.00114811;ICB=0.5;HOB=0.5;AC=2;AN=4;DP4=228,174,118,114;MQ=37	GT:PL:DP:DV:SP:DP4	0/1:255,0,255:355:143:1:114,98,74,69	0/1:248,0,255:279:89:9:114,76,44,45
Locus_2_Transcript_1207/4817_Confidence_1.000_Length_422	319	.	G	A	197	PASS	DP=899;VDB=0.000109966;SGB=-42.7731;RPB=0.973378;MQB=2.00351e-05;MQSB=0.00116324;BQB=0.00839865;MQ0F=0.00444939;ICB=0.5;HOB=0.5;AC=2;AN=4;DP4=246,222,54,79;MQ=37	GT:PL:DP:DV:SP:DP4	0/1:180,0,255:320:77:30:135,108,26,51	0/1:83,0,255:281:56:0:111,114,28,28
Locus_2_Transcript_1207/4817_Confidence_1.000_Length_422	340	.	G	A	156	PASS	DP=833;VDB=1.41902e-15;SGB=-43.3868;RPB=0.846278;MQB=1.77874e-17;MQSB=0.000665482;BQB=0.103867;MQ0F=0.00360144;ICB=0.3;HOB=0.125;AC=1;AN=4;DP4=203,239,51,84;MQ=37	GT:PL:DP:DV:SP:DP4	0/1:220,0,255:306:94:11:105,107,36,58	0/0:0,101,255:271:41:3:98,132,15,26
Locus_2_Transcript_1209/4817_Confidence_1.000_Length_216	111	.	G	A	201	PASS	DP=193;VDB=0.000834037;SGB=-12.7015;RPB=0.327593;MQB=0.653093;MQSB=0.458333;BQB=0.763847;MQ0F=0.0725389;ICB=0.5;HOB=0.5;AC=2;AN=4;DP4=61,2,35,0;MQ=28	GT:PL:DP:DV:SP:DP4	0/1:161,0,179:54:22:0:31,1,22,0	0/1:104,0,198:44:13:0:30,1,13,0
Locus_2_Transcript_1209/4817_Confidence_1.000_Length_216	127	.	G	A	387	PASS	DP=175;VDB=2.64296e-05;SGB=-19.1454;RPB=0.0208412;MQB=0.00354412;MQSB=0.999835;BQB=0.342334;MQ0F=0.08;ICB=0.5;HOB=0.5;AC=2;AN=4;DP4=29,12,49,7;MQ=28	GT:PL:DP:DV:SP:DP4	0/1:235,0,202:53:33:9:15,5,30,3	0/1:215,0,255:44:23:5:14,7,19,4
Locus_2_Transcript_1209/4817_Confidence_1.000_Length_216	143	.	T	C	428	PASS	DP=157;VDB=6.94132e-08;SGB=-18.5317;RPB=0.200307;MQB=0.0430355;MQSB=0.974075;BQB=0.926767;MQ0F=0.0636943;ICB=0.5;HOB=0.5;AC=2;AN=4;DP4=25,15,38,16;MQ=28	GT:PL:DP:DV:SP:DP4	0/1:255,0,220:50:31:10:11,8,25,6	0/1:236,0,255:44:23:3:14,7,13,10
Locus_2_Transcript_1209/4817_Confidence_1.000_Length_216	178	.	A	G	91	PASS	DP=108;VDB=1.96981e-05;SGB=-7.79186;RPB=0.218141;MQB=0.890189;MQSB=0.896666;BQB=0.762146;MQ0F=0.0648148;ICB=0.5;HOB=0.5;AC=2;AN=4;DP4=20,44,4,15;MQ=28	GT:PL:DP:DV:SP:DP4	0/1:65,0,255:44:9:1:15,20,3,6	0/1:92,0,255:39:10:0:5,24,1,9
Locus_2_Transcript_1210/4817_Confidence_1.000_Length_319	48	.	T	C	185	PASS	DP=57;VDB=1.45491e-06;SGB=-1.38007;RPB=0.999678;MQB=0.96176;BQB=0.566419;MQ0F=0.140351;ICB=0.3;HOB=0.125;AC=3;AN=4;DP4=10,0,38,0;MQ=22	GT:PL:DP:DV:SP:DP4	0/1:116,0,69:28:21:0:7,0,21,0	1/1:133,12,0:20:17:0:3,0,17,0
Locus_2_Transcript_1210/4817_Confidence_1.000_Length_319	132	.	C	T	105	PASS	DP=262;VDB=0.0333728;SGB=-15.4632;RPB=0.231086;MQB=0.8596;MQSB=0.00441763;BQB=0.911503;MQ0F=0.0496183;ICB=0.5;HOB=0.5;AC=2;AN=4;DP4=128,4,41,3;MQ=27	GT:PL:DP:DV:SP:DP4	0/1:144,0,169:73:25:5:46,2,22,3	0/1:27,0,162:103:19:0:82,2,19,0
Locus_2_Transcript_1210/4817_Confidence_1.000_Length_319	263	.	C	T	126	PASS	DP=164;VDB=0.00212766;SGB=-13.6221;RPB=0.331238;MQB=0.37282;MQSB=0.00838901;BQB=0.998565;MQ0F=0.146341;ICB=0.5;HOB=0.5;AC=2;AN=4;DP4=28,54,15,23;MQ=20	GT:PL:DP:DV:SP:DP4	0/1:109,0,165:45:15:0:13,17,6,9	0/1:82,0,248:75:23:4:15,37,9,14
Locus_2_Transcript_1214/4817_Confidence_1.000_Length_368	212	.	A	C	91	PASS	DP=148;VDB=6.65531e-05;SGB=-8.09871;RPB=0.797776;MQB=0.121374;MQSB=0.894044;BQB=0.893635;MQ0F=0;ICB=0.5;HOB=0.5;AC=2;AN=4;DP4=80,4,20,0;MQ=36	GT:PL:DP:DV:SP:DP4	0/1:65,0,187:43:8:0:34,1,8,0	0/1:93,0,230:61:12:0:46,3,12,0
Locus_2_Transcript_1215/4817_Confidence_1.000_Length_361	40	.	C	G	165	PASS	DP=31;VDB=8.23919e-06;SGB=-6.87115;RPB=0.934728;MQB=0.998127;BQB=0.35506;MQ0F=0;ICB=0.5;HOB=0.5;AC=2;AN=4;DP4=8,0,16,0;MQ=37	GT:PL:DP:DV:SP:DP4	0/1:72,0,30:4:3:0:1,0,3,0	0/1:157,0,110:20:13:0:7,0,13,0
Locus_2_Transcript_1216/4817_Confidence_1.000_Length_924	55	.	G	A	114	PASS	DP=35;VDB=0.0182842;SGB=-6.871;RPB=0.5048;MQB=0.625435;BQB=0.980111;MQ0F=0.171429;ICB=0.5;HOB=0.5;AC=2;AN=4;DP4=7,0,16,0;MQ=26	GT:PL:DP:DV:SP:DP4	0/1:34,0,54:5:2:0:3,0,2,0	0/1:144,0,17:18:14:0:4,0,14,0
Locus_2_Transcript_1216/4817_Confidence_1.000_Length_924	190	.	T	C	67	PASS	DP=73;VDB=0.826152;SGB=-5.02822;RPB=0.815787;MQB=0.998677;MQSB=0.632482;BQB=0.982985;MQ0F=0;ICB=0.3;HOB=0.125;AC=1;AN=4;DP4=40,8,8,2;MQ=36	GT:PL:DP:DV:SP:DP4	0/1:131,0,196:26:8:7:17,1,6,2	0/0:0,26,255:32:2:0:23,7,2,0
Locus_2_Transcript_1216/4817_Confidence_1.000_Length_924	219	.	A	G	374	PASS	DP=92;VDB=0.64283;SGB=-12.0878;RPB=0.991971;MQB=0.00373581;MQSB=0.516785;BQB=0.878996;MQ0F=0;ICB=0.5;HOB=0.5;AC=2;AN=4;DP4=25,4,28,5;MQ=37	GT:PL:DP:DV:SP:DP4	0/1:249,0,157:30:18:9:12,0,14,4	0/1:188,0,255:32:15:5:13,4,14,1
Locus_2_Transcript_1216/4817_Confidence_1.000_Length_924	227	.	C	T	136	PASS	DP=95;VDB=0.0738138;SGB=-7.79186;RPB=0.40727;MQB=0.0253784;MQSB=0.995911;BQB=0.123756;MQ0F=0;ICB=0.5;HOB=0.5;AC=2;AN=4;DP4=37,7,15,4;MQ=38	GT:PL:DP:DV:SP:DP4	0/1:45,0,254:28:8:2:17,3,6,2	0/1:158,0,255:35:11:0:20,4,9,2
Locus_2_Transcript_1216/4817_Confidence_1.000_Length_924	241	.	C	T	64	PASS	DP=94;VDB=0.560195;SGB=-5.02958;RPB=0.39706;MQB=0.236164;MQSB=0.660718;BQB=0.904886;MQ0F=0;ICB=0.5;HOB=0.5;AC=2;AN=4;DP4=43,13,8,2;MQ=38	GT:PL:DP:DV:SP:DP4	0/1:58,0,255:30:4:0:20,6,3,1	0/1:75,0,255:36:6:0:23,7,5,1
Locus_2_Transcript_1216/4817_Confidence_1.000_Length_924	286	.	A	G	121	PASS	DP=86;VDB=0.87547;SGB=-7.17814;RPB=0.950866;MQB=0.000227769;MQSB=0.692668;BQB=0.138129;MQ0F=0.0232558;ICB=0.5;HOB=0.5;AC=2;AN=4;DP4=31,15,7,10;MQ=37	GT:PL:DP:DV:SP:DP4	0/1:152,0,255:29:11:2:13,5,7,4	0/1:36,0,255:34:6:22:18,10,0,6
Locus_2_Transcript_1216/4817_Confidence_1.000_Length_924	365	.	G	A	122	PASS	DP=63;VDB=0.307124;SGB=4.69269;RPB=0.869286;MQB=0.94925;MQSB=0.639312;BQB=0.46394;MQ0F=0.126984;ICB=0.3;HOB=0.125;AC=1;AN=4;DP4=22,18,7,2;MQ=38	GT:PL:DP:DV:SP:DP4	0/1:186,0,232:24:9:7:7,8,7,2	0/0:0,75,255:25:0:0:15,10,0,0
Locus_2_Transcript_1216/4817_Confidence_1.000_Length_924	400	.	A	C	117	PASS	DP=65;VDB=0.583244;SGB=-5.64284;RPB=0.101513;MQB=0.347934;MQSB=0.87849;BQB=0.833016;MQ0F=0.107692;ICB=0.3;HOB=0.125;AC=1;AN=4;DP4=24,13,11,1;MQ=36	GT:PL:DP:DV:SP:DP4	0/0:0,17,255:26:2:3:15,9,2,0	0/1:181,0,231:23:10:5:9,4,9,1
Locus_2_Transcript_1216/4817_Confidence_1.000_Length_924	590	.	T	C	218	PASS	DP=65;VDB=0.442372;SGB=-6.87126;RPB=0.12085;MQB=1;MQSB=0.884751;BQB=0.472367;MQ0F=0;ICB=0.5;HOB=0.5;AC=2;AN=4;DP4=16,16,8,8;MQ=41	GT:PL:DP:DV:SP:DP4	0/1:247,0,250:22:11:0:6,5,5,6	0/1:36,0,255:26:5:0:10,11,3,2
Locus_2_Transcript_1216/4817_Confidence_1.000_Length_924	622	.	T	C	182	PASS	DP=51;VDB=0.331212;SGB=-5.64361;RPB=0.988493;MQB=0.686574;MQSB=0.902421;BQB=0.997111;MQ0F=0;ICB=0.5;HOB=0.5;AC=2;AN=4;DP4=12,15,5,7;MQ=41	GT:PL:DP:DV:SP:DP4	0/1:67,0,255:18:4:9:7,7,0,4	0/1:180,0,255:21:8:4:5,8,5,3
Locus_2_Transcript_1216/4817_Confidence_1.000_Length_924	623	.	G	A	180	PASS	DP=51;VDB=0.323915;SGB=-5.64361;RPB=0.995842;MQB=0.686574;MQSB=0.902421;BQB=0.748749;MQ0F=0;ICB=0.5;HOB=0.5;AC=2;AN=4;DP4=12,15,5,7;MQ=41	GT:PL:DP:DV:SP:DP4	0/1:67,0,255:18:4:9:7,7,0,4	0/1:178,0,255:21:8:4:5,8,5,3
Locus_2_Transcript_1221/4817_Confidence_1.000_Length_287	184	.	A	G	110	PASS	DP=48;VDB=0.152121;SGB=-5.33664;RPB=0.839294;MQB=0.388654;MQSB=0.791193;BQB=0.747002;MQ0F=0.0208333;ICB=0.5;HOB=0.5;AC=2;AN=4;DP4=11,11,5,6;MQ=26	GT:PL:DP:DV:SP:DP4	0/1:74,0,46:7:4:0:1,2,0,4	0/1:99,0,211:26:7:2:10,9,5,2
Locus_2_Transcript_1226/4817_Confidence_1.000_Length_251	114	.	T	C	166	PASS	DP=33;VDB=0.069007;SGB=-1.12814;RPB=0.923116;MQB=0.995012;BQB=0.782705;MQ0F=0.0606061;ICB=0.5;HOB=0.5;AC=2;AN=4;DP4=4,0,15,0;MQ=31	GT:PL:DP:DV:SP:DP4	0/1:114,0,14:12:10:0:2,0,10,0	0/1:119,0,39:7:5:0:2,0,5,0
Locus_2_Transcript_1226/4817_Confidence_1.000_Length_251	161	.	C	G	210	PASS	DP=68;VDB=0.00187095;SGB=-7.485;RPB=0.924298;MQB=0.668726;MQSB=0.5;BQB=0.998662;MQ0F=0.0147059;ICB=0.5;HOB=0.5;AC=2;AN=4;DP4=15,1,17,1;MQ=29	GT:PL:DP:DV:SP:DP4	0/1:138,0,107:20:11:0:9,0,10,1	0/1:136,0,128:14:7:0:6,1,7,0
Locus_2_Transcript_1232/4817_Confidence_1.000_Length_721	33	.	T	C	67	PASS	DP=9;VDB=0.00794932;SGB=-0.956117;RPB=0;MQB=0.166667;BQB=0.833333;MQ0F=0;ICB=0.3;HOB=0.125;AC=3;AN=4;DP4=2,0,6,0;MQ=32	GT:PL:DP:DV:SP:DP4	1/1:75,12,0:4:4:0:0,0,4,0	0/1:56,0,56:4:2:0:2,0,2,0
Locus_2_Transcript_1235/4817_Confidence_1.000_Length_857	207	.	G	C	63	PASS	DP=28;VDB=0.0120456;SGB=2.63044;RPB=0.80337;MQB=0.843281;MQSB=0.966484;BQB=0.993205;MQ0F=0;ICB=0.3;HOB=0.125;AC=1;AN=4;DP4=4,11,3,3;MQ=41	GT:PL:DP:DV:SP:DP4	0/0:0,15,129:5:0:0:0,5,0,0	0/1:127,0,232:16:6:0:4,6,3,3
Locus_2_Transcript_1235/4817_Confidence_1.000_Length_857	218	.	C	T	153	PASS	DP=28;VDB=0.505655;SGB=-4.71804;RPB=0.502832;MQB=0.913101;MQSB=0.950149;BQB=0.960401;MQ0F=0;ICB=0.5;HOB=0.5;AC=2;AN=4;DP4=4,8,5,4;MQ=41	GT:PL:DP:DV:SP:DP4	0/1:22,0,100:5:1:0:0,4,0,1	0/1:195,0,205:16:8:0:4,4,5,3
Locus_2_Transcript_1235/4817_Confidence_1.000_Length_857	642	.	C	T	71	PASS	DP=16;VDB=0.981366;SGB=2.63044;RPB=0.957526;MQB=0.105399;MQSB=0.926163;BQB=0.569783;MQ0F=0.0625;ICB=0.3;HOB=0.125;AC=1;AN=4;DP4=7,2,4,2;MQ=34	GT:PL:DP:DV:SP:DP4	0/0:0,15,110:5:0:0:5,0,0,0	0/1:135,0,71:10:6:0:2,2,4,2
Locus_2_Transcript_1236/4817_Confidence_1.000_Length_322	26	.	A	C	77	PASS	DP=24;VDB=4.82811e-05;SGB=-5.02958;RPB=0.0225184;MQB=0.86753;BQB=0.999014;MQ0F=0;ICB=0.5;HOB=0.5;AC=2;AN=4;DP4=8,0,10,0;MQ=25	GT:PL:DP:DV:SP:DP4	0/1:90,0,54:8:6:0:2,0,6,0	0/1:50,0,60:10:4:0:6,0,4,0
Locus_2_Transcript_1236/4817_Confidence_1.000_Length_322	61	.	T	C	114	PASS	DP=40;VDB=7.203e-05;SGB=-1.30935;RPB=0.222635;MQB=0.118179;BQB=0.566154;MQ0F=0.05;ICB=0.5;HOB=0.5;AC=2;AN=4;DP4=6,0,18,0;MQ=24	GT:PL:DP:DV:SP:DP4	0/1:108,0,48:10:8:0:2,0,8,0	0/1:70,0,54:14:10:0:4,0,10,0
Locus_2_Transcript_1236/4817_Confidence_1.000_Length_322	98	.	T	A	86	PASS	DP=49;VDB=0.00300695;SGB=-7.48501;RPB=0.981777;MQB=0.573314;BQB=0.835606;MQ0F=0.0612245;ICB=0.5;HOB=0.5;AC=2;AN=4;DP4=10,0,18,0;MQ=23	GT:PL:DP:DV:SP:DP4	0/1:105,0,51:11:9:0:2,0,9,0	0/1:44,0,90:17:9:0:8,0,9,0
Locus_2_Transcript_1249/4817_Confidence_1.000_Length_395	202	.	C	T	71	PASS	DP=17;VDB=0.407747;SGB=1.97062;RPB=0.462292;MQB=0.809011;MQSB=1;BQB=0.809011;MQ0F=0;ICB=1;HOB=0.5;AC=1;AN=2;DP4=2,1,6,0;MQ=39	GT:PL:DP:DV:SP:DP4	./.:0,0,0:0:0:0:0,0,0,0	0/1:132,0,88:9:6:0:2,1,6,0
Locus_2_Transcript_1252/4817_Confidence_1.000_Length_252	203	.	A	C	73	PASS	DP=55;VDB=3.53002e-06;SGB=-1.2783;RPB=0.884615;MQB=0;MQSB=0.969852;BQB=0.974359;MQ0F=0.181818;AC=4;AN=4;DP4=0,2,14,25;MQ=10	GT:PL:DP:DV:SP:DP4	1/1:98,44,0:27:26:0:0,1,11,15	1/1:31,5,0:14:13:0:0,1,3,10
Locus_2_Transcript_1255/4817_Confidence_1.000_Length_234	100	.	T	G	72	PASS	DP=74;VDB=0.00478256;SGB=-7.17813;RPB=0.592004;MQB=0.874735;BQB=0.71497;MQ0F=0.0405405;ICB=0.5;HOB=0.5;AC=2;AN=4;DP4=31,0,17,0;MQ=22	GT:PL:DP:DV:SP:DP4	0/1:52,0,146:20:5:0:15,0,5,0	0/1:84,0,105:28:12:0:16,0,12,0
Locus_2_Transcript_1255/4817_Confidence_1.000_Length_234	106	.	T	C	191	PASS	DP=77;VDB=8.16271e-05;SGB=-0.825537;RPB=0.989557;MQB=0.00515578;BQB=0.249473;MQ0F=0.012987;ICB=0.3;HOB=0.125;AC=3;AN=4;DP4=8,0,38,0;MQ=23	GT:PL:DP:DV:SP:DP4	0/1:105,0,142:18:10:0:8,0,10,0	1/1:150,84,0:28:28:0:0,0,28,0
Locus_2_Transcript_1255/4817_Confidence_1.000_Length_234	166	.	G	A	329	PASS	DP=64;VDB=0.102506;SGB=-0.825537;RPB=0.86787;MQB=0.181422;MQSB=0.503202;BQB=0.99951;MQ0F=0.078125;ICB=0.3;HOB=0.125;AC=3;AN=4;DP4=3,4,16,22;MQ=21	GT:PL:DP:DV:SP:DP4	0/1:145,0,134:17:10:0:3,4,5,5	1/1:248,84,0:28:28:0:0,0,11,17
Locus_2_Transcript_1255/4817_Confidence_1.000_Length_234	174	.	A	T	280	PASS	DP=52;VDB=0.0200274;SGB=-0.810665;RPB=0.427508;MQB=0.725858;MQSB=0.161327;BQB=0.602683;MQ0F=0.0961538;ICB=0.3;HOB=0.125;AC=3;AN=4;DP4=3,2,13,18;MQ=20	GT:PL:DP:DV:SP:DP4	0/1:126,0,78:13:8:2:3,2,3,5	1/1:218,69,0:23:23:0:0,0,10,13
Locus_2_Transcript_1255/4817_Confidence_1.000_Length_234	224	.	T	C	103	PASS	DP=26;VDB=8.17318e-09;SGB=-7.17804;RPB=0.729697;MQB=0.95083;MQSB=0.295455;BQB=0.975597;MQ0F=0.192308;ICB=0.3;HOB=0.125;AC=3;AN=4;DP4=0,7,2,15;MQ=18	GT:PL:DP:DV:SP:DP4	0/1:46,0,73:9:3:0:0,6,1,2	1/1:121,33,0:15:14:0:0,1,1,13
Locus_2_Transcript_1256/4817_Confidence_1.000_Length_272	160	.	A	G	168	PASS	DP=59;VDB=0.358133;SGB=-1.36128;RPB=0.944795;MQB=0.274812;MQSB=0.107143;BQB=0.994638;MQ0F=0.152542;ICB=0.3;HOB=0.125;AC=3;AN=4;DP4=6,0,22,2;MQ=22	GT:PL:DP:DV:SP:DP4	0/1:106,0,96:18:12:3:6,0,10,2	1/1:126,36,0:12:12:0:0,0,12,0
Locus_2_Transcript_1256/4817_Confidence_1.000_Length_272	176	.	G	C	185	PASS	DP=53;VDB=0.00299667;SGB=-1.36354;RPB=0.966771;MQB=0.0309138;MQSB=0.799756;BQB=0.819296;MQ0F=0.0943396;ICB=0.3;HOB=0.125;AC=3;AN=4;DP4=2,1,23,2;MQ=23	GT:PL:DP:DV:SP:DP4	0/1:118,0,66:16:13:5:2,1,12,1	1/1:132,36,0:12:12:0:0,0,11,1
Locus_2_Transcript_1256/4817_Confidence_1.000_Length_272	200	.	T	C	63	PASS	DP=48;VDB=0.00339369;SGB=6.07412;RPB=0.91428;MQB=0.923174;MQSB=0.11991;BQB=0.64239;MQ0F=0.0625;ICB=0.3;HOB=0.125;AC=1;AN=4;DP4=10,7,10,1;MQ=23	GT:PL:DP:DV:SP:DP4	0/1:127,0,69:16:11:7:3,2,10,1	0/0:0,36,159:12:0:0:7,5,0,0
Locus_2_Transcript_1256/4817_Confidence_1.000_Length_272	244	.	T	C	70	PASS	DP=27;VDB=0.000148397;SGB=-4.72235;RPB=0.815018;MQB=0.796201;MQSB=0.803979;BQB=0.103031;MQ0F=0.0740741;ICB=0.5;HOB=0.5;AC=2;AN=4;DP4=0,12,5,4;MQ=21	GT:PL:DP:DV:SP:DP4	0/1:61,0,84:11:5:12:0,6,3,2	0/1:72,0,41:10:4:9:0,6,2,2
Locus_2_Transcript_1260/4817_Confidence_1.000_Length_462	235	.	A	C	96	PASS	DP=31;VDB=0.406197;SGB=8.15014;RPB=0.99915;MQB=0.256521;MQSB=0.562801;BQB=0.441677;MQ0F=0.129032;ICB=0.3;HOB=0.125;AC=1;AN=4;DP4=4,2,10,4;MQ=24	GT:PL:DP:DV:SP:DP4	0/0:0,9,97:3:0:0:3,0,0,0	0/1:160,0,22:17:14:3:1,2,10,4
Locus_2_Transcript_1260/4817_Confidence_1.000_Length_462	238	.	A	G	89	PASS	DP=31;VDB=0.447301;SGB=4.69269;RPB=0.901319;MQB=0.930391;MQSB=0.562801;BQB=0.590979;MQ0F=0.129032;ICB=0.3;HOB=0.125;AC=1;AN=4;DP4=8,3,6,3;MQ=24	GT:PL:DP:DV:SP:DP4	0/0:0,9,97:3:0:0:3,0,0,0	0/1:153,0,59:17:9:0:5,3,6,3
Locus_2_Transcript_1260/4817_Confidence_1.000_Length_462	240	.	C	T	89	PASS	DP=31;VDB=0.437652;SGB=4.69269;RPB=0.901319;MQB=0.930391;MQSB=0.562801;BQB=0.659954;MQ0F=0.129032;ICB=0.3;HOB=0.125;AC=1;AN=4;DP4=8,3,6,3;MQ=24	GT:PL:DP:DV:SP:DP4	0/0:0,9,90:3:0:0:3,0,0,0	0/1:153,0,59:17:9:0:5,3,6,3
Locus_2_Transcript_1263/4817_Confidence_1.000_Length_266	86	.	C	T	68	PASS	DP=19;VDB=0.0162911;SGB=-4.09964;RPB=0.0389771;MQB=0.194886;BQB=0.0584657;MQ0F=0;ICB=0.3;HOB=0.125;AC=3;AN=4;DP4=5,0,7,0;MQ=32	GT:PL:DP:DV:SP:DP4	1/1:8,3,0:1:1:0:0,0,1,0	0/1:123,0,71:11:6:0:5,0,6,0
Locus_2_Transcript_1264/4817_Confidence_1.000_Length_284	119	.	A	G	73	PASS	DP=21;VDB=0.949877;SGB=3.31571;RPB=0.245404;MQB=0.920266;MQSB=0.040184;BQB=0.378331;MQ0F=0.0952381;ICB=1;HOB=0.5;AC=1;AN=2;DP4=5,1,5,2;MQ=35	GT:PL:DP:DV:SP:DP4	./.:0,0,0:0:0:0:0,0,0,0	0/1:133,0,121:13:7:0:5,1,5,2
Locus_2_Transcript_1266/4817_Confidence_1.000_Length_243	59	.	T	C	162	PASS	DP=135;VDB=0.000882291;SGB=-11.4741;RPB=0.997434;MQB=0.359834;BQB=0.99082;MQ0F=0.00740741;ICB=0.5;HOB=0.5;AC=2;AN=4;DP4=68,0,31,0;MQ=37	GT:PL:DP:DV:SP:DP4	0/1:90,0,161:13:4:0:9,0,4,0	0/1:137,0,179:86:27:0:59,0,27,0
Locus_2_Transcript_1266/4817_Confidence_1.000_Length_243	60	.	A	G	266	PASS	DP=140;VDB=3.65092e-09;SGB=-23.7482;RPB=0.99807;MQB=0.666232;BQB=0.928717;MQ0F=0.00714286;ICB=0.5;HOB=0.5;AC=2;AN=4;DP4=28,0,71,0;MQ=37	GT:PL:DP:DV:SP:DP4	0/1:161,0,90:13:9:0:4,0,9,0	0/1:170,0,123:86:62:0:24,0,62,0
Locus_2_Transcript_1266/4817_Confidence_1.000_Length_243	173	.	A	G	274	PASS	DP=204;VDB=6.30824e-05;SGB=-11.4741;RPB=0.973855;MQB=0.872109;MQSB=0.253283;BQB=0.998192;MQ0F=0.00490196;ICB=0.5;HOB=0.5;AC=2;AN=4;DP4=52,52,17,14;MQ=38	GT:PL:DP:DV:SP:DP4	0/1:138,0,255:23:6:0:11,6,4,2	0/1:202,0,255:112:25:1:41,46,13,12
Locus_2_Transcript_1266/4817_Confidence_1.000_Length_243	181	.	A	G	190	PASS	DP=199;VDB=3.81318e-05;SGB=-9.93983;RPB=0.920172;MQB=0.723494;MQSB=0.260372;BQB=0.800709;MQ0F=0.00502513;ICB=0.5;HOB=0.5;AC=2;AN=4;DP4=51,57,14,12;MQ=38	GT:PL:DP:DV:SP:DP4	0/1:92,0,255:23:5:9:10,8,5,0	0/1:165,0,255:111:21:0:41,49,9,12
Locus_2_Transcript_1267/4817_Confidence_1.000_Length_331	92	.	C	G	171	PASS	DP=328;VDB=0.000446015;SGB=-22.5208;RPB=0.989391;MQB=0.249463;BQB=0.964374;MQ0F=0.00304878;ICB=0.5;HOB=0.5;AC=2;AN=4;DP4=146,0,67,0;MQ=34	GT:PL:DP:DV:SP:DP4	0/1:105,0,172:42:9:0:33,0,9,0	0/1:131,0,191:171:58:0:113,0,58,0
Locus_2_Transcript_1267/4817_Confidence_1.000_Length_331	146	.	G	T	445	PASS	DP=422;VDB=0.997961;SGB=-65.787;RPB=0.00627536;MQB=1.05341e-05;MQSB=0.00353888;BQB=0.856011;MQ0F=0.00473934;ICB=0.5;HOB=0.5;AC=2;AN=4;DP4=67,18,168,40;MQ=35	GT:PL:DP:DV:SP:DP4	0/1:255,0,241:54:34:0:17,3,28,6	0/1:255,0,192:239:174:2:50,15,140,34
Locus_2_Transcript_1267/4817_Confidence_1.000_Length_331	147	.	G	T	273	PASS	DP=426;VDB=0.996028;SGB=-29.2716;RPB=0.580933;MQB=0.99235;MQSB=0.00591829;BQB=0.623479;MQ0F=0.00469484;ICB=0.5;HOB=0.5;AC=2;AN=4;DP4=164,41,71,18;MQ=35	GT:PL:DP:DV:SP:DP4	0/1:84,0,255:54:8:2:39,7,6,2	0/1:255,0,255:240:81:1:125,34,65,16
Locus_2_Transcript_1267/4817_Confidence_1.000_Length_331	150	.	C	T	165	PASS	DP=426;VDB=0.722768;SGB=-20.066;RPB=0.716397;MQB=0.00078897;MQSB=0.0367689;BQB=0.517052;MQ0F=0.00469484;ICB=0.3;HOB=0.125;AC=1;AN=4;DP4=178,56,45,14;MQ=35	GT:PL:DP:DV:SP:DP4	0/1:229,0,255:54:22:3:24,8,19,3	0/0:0,41,255:239:37:4:154,48,26,11
Locus_2_Transcript_1267/4817_Confidence_1.000_Length_331	154	.	G	A	447	PASS	DP=443;VDB=0.966384;SGB=-39.7046;RPB=0.444888;MQB=4.59617e-08;MQSB=0.0777332;BQB=0.401093;MQ0F=0.00451467;ICB=0.5;HOB=0.5;AC=2;AN=4;DP4=124,44,96,27;MQ=35	GT:PL:DP:DV:SP:DP4	0/1:255,0,255:52:27:0:20,5,21,6	0/1:255,0,255:239:96:4:104,39,75,21
Locus_2_Transcript_1267/4817_Confidence_1.000_Length_331	177	.	G	A	446	PASS	DP=391;VDB=0.158947;SGB=-55.9678;RPB=0.425146;MQB=0.0465557;MQSB=0.919766;BQB=0.774383;MQ0F=0;ICB=0.5;HOB=0.5;AC=2;AN=4;DP4=41,36,126,50;MQ=36	GT:PL:DP:DV:SP:DP4	0/1:255,0,231:43:28:25:4,11,21,7	0/1:255,0,255:210:148:8:37,25,105,43
Locus_2_Transcript_1268/4817_Confidence_1.000_Length_249	146	.	C	T	74	PASS	DP=261;VDB=0.0046233;SGB=-7.79185;RPB=0.000794284;MQB=0.757706;MQSB=0.195623;BQB=0.870091;MQ0F=0;ICB=0.3;HOB=0.125;AC=1;AN=4;DP4=75,78,14,5;MQ=40	GT:PL:DP:DV:SP:DP4	0/1:138,0,255:23:6:0:10,7,4,2	0/0:0,83,255:149:13:11:65,71,10,3
Locus_2_Transcript_1268/4817_Confidence_1.000_Length_249	210	.	C	A	144	PASS	DP=90;VDB=0.000195432;SGB=10.2282;RPB=0.575844;MQB=0.709338;MQSB=0.993865;BQB=0.808218;MQ0F=0;ICB=0.3;HOB=0.125;AC=1;AN=4;DP4=12,44,5,12;MQ=38	GT:PL:DP:DV:SP:DP4	0/0:0,24,186:8:0:0:1,7,0,0	0/1:209,0,255:65:17:1:11,37,5,12
Locus_2_Transcript_1268/4817_Confidence_1.000_Length_249	220	.	G	A	198	PASS	DP=61;VDB=1.90256e-09;SGB=-9.63294;RPB=0.0438101;MQB=0.0413666;MQSB=0.970265;BQB=0.996809;MQ0F=0;ICB=0.5;HOB=0.5;AC=2;AN=4;DP4=5,15,5,20;MQ=37	GT:PL:DP:DV:SP:DP4	0/1:17,0,36:2:1:0:1,0,0,1	0/1:244,0,253:43:24:0:4,15,5,19
Locus_2_Transcript_1269/4817_Confidence_1.000_Length_268	36	.	T	G	64	PASS	DP=169;VDB=1.56079e-17;SGB=-30.1921;RPB=0.410834;MQB=0.915025;BQB=0.906734;MQ0F=0.177515;ICB=0.3;HOB=0.125;AC=3;AN=4;DP4=51,0,92,0;MQ=11	GT:PL:DP:DV:SP:DP4	1/1:48,3,0:51:37:0:14,0,37,0	0/1:79,0,90:92:55:0:37,0,55,0
Locus_2_Transcript_1269/4817_Confidence_1.000_Length_268	49	.	T	C	213	PASS	DP=224;VDB=1.73184e-24;SGB=-1.38628;RPB=0.798742;MQB=0.830189;BQB=0.773585;MQ0F=0.1875;AC=4;AN=4;DP4=2,0,159,0;MQ=12	GT:PL:DP:DV:SP:DP4	1/1:105,163,0:60:59:0:1,0,59,0	1/1:162,255,0:101:100:0:1,0,100,0
Locus_2_Transcript_1269/4817_Confidence_1.000_Length_268	50	.	G	A	195	PASS	DP=235;VDB=6.77353e-26;SGB=-1.3849;RPB=0.146356;MQB=0.0720941;BQB=0.624124;MQ0F=0.191489;AC=4;AN=4;DP4=13,0,149,0;MQ=12	GT:PL:DP:DV:SP:DP4	1/1:95,67,0:61:50:0:11,0,50,0	1/1:155,255,0:101:99:0:2,0,99,0
Locus_2_Transcript_1269/4817_Confidence_1.000_Length_268	53	.	C	A	153	PASS	DP=237;VDB=5.77777e-26;SGB=-1.38594;RPB=0.0666162;MQB=0.406665;BQB=0.999961;MQ0F=0.189873;AC=4;AN=4;DP4=14,0,149,0;MQ=12	GT:PL:DP:DV:SP:DP4	1/1:60,53,0:61:52:0:9,0,52,0	1/1:148,217,0:102:97:0:5,0,97,0
Locus_2_Transcript_1269/4817_Confidence_1.000_Length_268	54	.	A	G	159	PASS	DP=238;VDB=1.15212e-24;SGB=-1.38628;RPB=0.368285;MQB=0.512589;BQB=0.978721;MQ0F=0.189076;AC=4;AN=4;DP4=8,0,155,0;MQ=12	GT:PL:DP:DV:SP:DP4	1/1:66,113,0:61:58:0:3,0,58,0	1/1:148,217,0:102:97:0:5,0,97,0
Locus_2_Transcript_1269/4817_Confidence_1.000_Length_268	81	.	A	C	229	PASS	DP=361;VDB=1.08678e-05;SGB=-44.6142;RPB=0.917716;MQB=0.0352174;BQB=0.988125;MQ0F=0.135734;ICB=0.5;HOB=0.5;AC=2;AN=4;DP4=100,0,139,0;MQ=16	GT:PL:DP:DV:SP:DP4	0/1:141,0,89:85:45:0:40,0,45,0	0/1:152,0,113:154:94:0:60,0,94,0
Locus_2_Transcript_1269/4817_Confidence_1.000_Length_268	161	.	G	A	211	PASS	DP=381;VDB=0.0319382;SGB=-28.9647;RPB=0.995861;MQB=0.025842;MQSB=1.82677e-09;BQB=0.172846;MQ0F=0.0787402;ICB=0.5;HOB=0.5;AC=2;AN=4;DP4=89,80,37,51;MQ=18	GT:PL:DP:DV:SP:DP4	0/1:102,0,255:94:36:0:29,29,18,18	0/1:174,0,255:163:52:14:60,51,19,33
Locus_2_Transcript_1269/4817_Confidence_1.000_Length_268	166	.	C	T	270	PASS	DP=372;VDB=5.15176e-05;SGB=-35.1018;RPB=0.525336;MQB=5.62031e-08;MQSB=5.38863e-08;BQB=0.531765;MQ0F=0.0698925;ICB=0.5;HOB=0.5;AC=2;AN=4;DP4=73,66,49,59;MQ=19	GT:PL:DP:DV:SP:DP4	0/1:116,0,255:92:43:7:27,22,18,25	0/1:218,0,255:155:65:1:46,44,31,34
Locus_2_Transcript_1269/4817_Confidence_1.000_Length_268	185	.	A	G	184	PASS	DP=293;VDB=1.78553e-05;SGB=-22.8277;RPB=0.974926;MQB=0.0759926;MQSB=0.00513169;BQB=0.999226;MQ0F=0.0580205;ICB=0.5;HOB=0.5;AC=2;AN=4;DP4=57,88,23,45;MQ=20	GT:PL:DP:DV:SP:DP4	0/1:71,0,254:80:24:5:22,34,6,18	0/1:178,0,255:133:44:0:35,54,17,27
Locus_2_Transcript_1269/4817_Confidence_1.000_Length_268	232	.	C	T	164	PASS	DP=123;VDB=1.14768e-12;SGB=-16.3837;RPB=0.646215;MQB=0.639572;MQSB=0.988611;BQB=0.56189;MQ0F=0.0487805;ICB=0.5;HOB=0.5;AC=2;AN=4;DP4=4,45,11,36;MQ=16	GT:PL:DP:DV:SP:DP4	0/1:100,0,56:32:17:11:1,14,6,11	0/1:127,0,164:64:30:3:3,31,5,25
Locus_2_Transcript_1270/4817_Confidence_1.000_Length_308	41	.	G	T	150	PASS	DP=82;VDB=4.42621e-06;SGB=-9.32613;RPB=0.96548;MQB=0.143353;BQB=0.330302;MQ0F=0;ICB=0.5;HOB=0.5;AC=2;AN=4;DP4=41,0,24,0;MQ=31	GT:PL:DP:DV:SP:DP4	0/1:95,0,160:23:8:0:15,0,8,0	0/1:119,0,171:42:16:0:26,0,16,0
Locus_2_Transcript_1270/4817_Confidence_1.000_Length_308	126	.	A	G	291	PASS	DP=298;VDB=0.106084;SGB=-33.8744;RPB=0.996115;MQB=0.394948;MQSB=0.980893;BQB=0.130995;MQ0F=0.00671141;ICB=0.5;HOB=0.5;AC=2;AN=4;DP4=108,15,97,7;MQ=25	GT:PL:DP:DV:SP:DP4	0/1:145,0,255:110:48:7:54,8,46,2	0/1:210,0,255:117:56:1:54,7,51,5
Locus_2_Transcript_1270/4817_Confidence_1.000_Length_308	196	.	A	G	455	PASS	DP=382;VDB=0.000234377;SGB=-1.38629;RPB=0.692657;MQB=0.136086;MQSB=6.93445e-12;BQB=0.550263;MQ0F=0.0418848;AC=4;AN=4;DP4=1,3,144,92;MQ=22	GT:PL:DP:DV:SP:DP4	1/1:255,219,0:115:111:9:1,3,75,36	1/1:255,255,0:125:125:0:0,0,69,56
Locus_2_Transcript_1270/4817_Confidence_1.000_Length_308	242	.	A	G	449	PASS	DP=270;VDB=1.5461e-22;SGB=-1.38629;RPB=0.588435;MQB=0.992732;MQSB=1.09691e-08;BQB=0.976912;MQ0F=0.0666667;AC=4;AN=4;DP4=2,5,51,151;MQ=20	GT:PL:DP:DV:SP:DP4	1/1:249,222,0:100:98:4:1,1,21,77	1/1:255,238,0:109:104:0:1,4,30,74
Locus_2_Transcript_1270/4817_Confidence_1.000_Length_308	248	.	T	C	453	PASS	DP=244;VDB=8.95261e-19;SGB=-1.38629;RPB=0.42328;MQB=0.00529101;MQSB=1.42298e-08;BQB=0.497355;MQ0F=0.0737705;AC=4;AN=4;DP4=0,2,45,144;MQ=20	GT:PL:DP:DV:SP:DP4	1/1:253,213,0:93:91:0:0,2,19,72	1/1:255,255,0:98:98:0:0,0,26,72
Locus_2_Transcript_1270/4817_Confidence_1.000_Length_308	270	.	G	A	170	PASS	DP=133;VDB=1.13401e-13;SGB=-19.7591;RPB=0.561608;MQB=0.751786;MQSB=3.05022e-05;BQB=0.34927;MQ0F=0.0902256;ICB=0.5;HOB=0.5;AC=2;AN=4;DP4=13,42,6,52;MQ=20	GT:PL:DP:DV:SP:DP4	0/1:110,0,125:51:32:2:3,16,3,29	0/1:123,0,182:62:26:7:10,26,3,23
Locus_2_Transcript_1277/4817_Confidence_1.000_Length_386	299	.	T	C	86	PASS	DP=105;VDB=0.000271623;SGB=-17.918;RPB=0.142471;MQB=0.0497982;MQSB=0.197529;BQB=0.973552;MQ0F=0.152381;ICB=0.5;HOB=0.5;AC=2;AN=4;DP4=10,11,22,30;MQ=14	GT:PL:DP:DV:SP:DP4	0/1:80,0,114:44:27:3:7,10,14,13	0/1:70,0,61:29:25:9:3,1,8,17
Locus_2_Transcript_1277/4817_Confidence_1.000_Length_386	350	.	A	G	71	PASS	DP=61;VDB=2.11546e-05;SGB=-11.1672;RPB=0.634314;MQB=0.00771954;MQSB=0.831867;BQB=0.330688;MQ0F=0.0983607;ICB=0.5;HOB=0.5;AC=2;AN=4;DP4=6,13,3,27;MQ=16	GT:PL:DP:DV:SP:DP4	0/1:70,0,118:30:18:4:3,9,2,16	0/1:64,0,86:19:12:9:3,4,1,11
Locus_2_Transcript_1283/4817_Confidence_1.000_Length_288	135	.	T	C	61	PASS	DP=376;VDB=0.000764471;SGB=-40.0114;RPB=0.00969721;MQB=1.06422e-14;MQSB=0.363338;BQB=0.849926;MQ0F=0.037234;ICB=0.5;HOB=0.5;AC=2;AN=4;DP4=80,18,119,5;MQ=21	GT:PL:DP:DV:SP:DP4	0/1:68,0,193:55:31:15:18,6,30,1	0/1:57,0,255:167:93:18:62,12,89,4
Locus_2_Transcript_1283/4817_Confidence_1.000_Length_288	190	.	C	T	144	PASS	DP=293;VDB=1.84085e-11;SGB=-44.9211;RPB=0.709869;MQB=6.12328e-23;MQSB=0.643225;BQB=0.992337;MQ0F=0.0648464;ICB=0.5;HOB=0.5;AC=2;AN=4;DP4=26,30,71,69;MQ=20	GT:PL:DP:DV:SP:DP4	0/1:125,0,176:45:34:0:6,5,18,16	0/1:82,0,255:151:106:2:20,25,53,53
Locus_2_Transcript_1283/4817_Confidence_1.000_Length_288	206	.	T	A	132	PASS	DP=199;VDB=2.28634e-10;SGB=-38.4771;RPB=0.428989;MQB=9.53803e-17;MQSB=0.542983;BQB=0.266911;MQ0F=0.0954774;ICB=0.5;HOB=0.5;AC=2;AN=4;DP4=7,36,30,89;MQ=18	GT:PL:DP:DV:SP:DP4	0/1:101,0,94:39:29:5:0,10,5,24	0/1:94,0,175:123:90:2:7,26,25,65
Locus_2_Transcript_1283/4817_Confidence_1.000_Length_288	218	.	T	C	137	PASS	DP=168;VDB=5.70335e-07;SGB=-22.8277;RPB=0.00553208;MQB=4.0558e-09;MQSB=0.806522;BQB=0.886815;MQ0F=0.10119;ICB=0.5;HOB=0.5;AC=2;AN=4;DP4=8,42,18,50;MQ=19	GT:PL:DP:DV:SP:DP4	0/1:77,0,119:27:12:7:0,15,2,10	0/1:124,0,234:91:56:2:8,27,16,40
Locus_2_Transcript_1283/4817_Confidence_1.000_Length_288	228	.	T	G	115	PASS	DP=105;VDB=1.14913e-11;SGB=-20.6797;RPB=0.674721;MQB=4.79047e-08;MQSB=0.954988;BQB=0.804991;MQ0F=0.152381;ICB=0.5;HOB=0.5;AC=2;AN=4;DP4=7,14,15,46;MQ=18	GT:PL:DP:DV:SP:DP4	0/1:65,0,59:15:11:0:0,4,0,11	0/1:114,0,170:67:50:3:7,10,15,35
Locus_2_Transcript_1283/4817_Confidence_1.000_Length_288	232	.	A	T	118	PASS	DP=103;VDB=3.23186e-11;SGB=-19.7591;RPB=0.29651;MQB=2.58778e-08;MQSB=0.623622;BQB=0.952839;MQ0F=0.15534;ICB=0.5;HOB=0.5;AC=2;AN=4;DP4=6,18,14,44;MQ=18	GT:PL:DP:DV:SP:DP4	0/1:66,0,64:15:10:0:0,5,0,10	0/1:116,0,170:67:48:0:6,13,14,34
Locus_2_Transcript_1298/4817_Confidence_1.000_Length_357	137	.	C	T	211	PASS	DP=219;VDB=0.91356;SGB=-24.9756;RPB=0.242376;MQB=0.0153795;MQSB=0.920608;BQB=0.544768;MQ0F=0.173516;ICB=0.5;HOB=0.5;AC=2;AN=4;DP4=70,1,66,9;MQ=13	GT:PL:DP:DV:SP:DP4	0/1:90,0,32:45:20:0:25,0,20,0	0/1:185,0,110:101:55:17:45,1,46,9
Locus_2_Transcript_1298/4817_Confidence_1.000_Length_357	171	.	A	G	273	PASS	DP=230;VDB=0.000575965;SGB=-0.123757;RPB=0.0702821;MQB=0.952529;MQSB=0.0817539;BQB=0.925777;MQ0F=0.143478;ICB=0.3;HOB=0.125;AC=3;AN=4;DP4=11,3,45,28;MQ=17	GT:PL:DP:DV:SP:DP4	1/1:168,23,0:23:18:6:5,0,11,7	0/1:167,0,10:64:55:0:6,3,34,21
Locus_2_Transcript_1298/4817_Confidence_1.000_Length_357	223	.	C	T	65	PASS	DP=228;VDB=0.287135;SGB=-12.0878;RPB=0.832607;MQB=1.25703e-07;MQSB=0.580224;BQB=0.0109448;MQ0F=0.122807;ICB=0.5;HOB=0.5;AC=2;AN=4;DP4=81,43,9,24;MQ=13	GT:PL:DP:DV:SP:DP4	0/1:50,0,30:46:10:31:21,15,0,10	0/1:79,0,57:111:23:18:60,28,9,14
Locus_2_Transcript_1298/4817_Confidence_1.000_Length_357	261	.	C	T	210	PASS	DP=157;VDB=0.0240365;SGB=0.176116;RPB=0.276239;MQB=0.16951;MQSB=0.615799;BQB=0.0323087;MQ0F=0.152866;AC=4;AN=4;DP4=13,5,33,60;MQ=12	GT:PL:DP:DV:SP:DP4	1/1:122,24,0:31:23:7:5,3,7,16	1/1:143,75,0:80:70:18:8,2,26,44
Locus_2_Transcript_1298/4817_Confidence_1.000_Length_357	278	.	G	A	204	PASS	DP=130;VDB=0.000610783;SGB=0.294828;RPB=0.410118;MQB=0.218738;MQSB=0.999547;BQB=0.220492;MQ0F=0.176923;AC=4;AN=4;DP4=8,9,22,61;MQ=12	GT:PL:DP:DV:SP:DP4	1/1:113,19,0:28:20:4:3,5,4,16	1/1:146,62,0:72:63:9:5,4,18,45
Locus_2_Transcript_1298/4817_Confidence_1.000_Length_357	284	.	T	C	88	PASS	DP=127;VDB=6.78768e-06;SGB=-21.6002;RPB=0.847687;MQB=0.341565;MQSB=0.842657;BQB=0.594209;MQ0F=0.181102;ICB=0.5;HOB=0.5;AC=2;AN=4;DP4=8,25,20,44;MQ=12	GT:PL:DP:DV:SP:DP4	0/1:30,0,54:26:17:4:1,8,6,11	0/1:121,0,97:71:47:0:7,17,14,33
Locus_2_Transcript_1298/4817_Confidence_1.000_Length_357	286	.	G	A	204	PASS	DP=127;VDB=0.000108741;SGB=1.93255;RPB=0.310608;MQB=0.208073;MQSB=0.831179;BQB=0.415523;MQ0F=0.181102;AC=4;AN=4;DP4=7,10,21,57;MQ=13	GT:PL:DP:DV:SP:DP4	1/1:105,13,0:24:16:2:3,5,4,12	1/1:154,68,0:71:62:4:4,5,17,45
Locus_2_Transcript_1298/4817_Confidence_1.000_Length_357	299	.	A	G	169	PASS	DP=101;VDB=1.03859e-08;SGB=4.20627;RPB=0.902778;MQB=0;MQSB=0.993337;BQB=0.902778;MQ0F=0.19802;AC=4;AN=4;DP4=0,2,20,52;MQ=14	GT:PL:DP:DV:SP:DP4	1/1:60,33,0:11:11:0:0,0,2,9	1/1:164,119,0:63:61:0:0,2,18,43
Locus_2_Transcript_1302/4817_Confidence_1.000_Length_203	76	.	G	A	138	PASS	DP=157;VDB=1.16005e-06;SGB=-9.01927;RPB=0.925628;MQB=0.00632536;MQSB=1;BQB=0.303227;MQ0F=0.0573248;ICB=0.5;HOB=0.5;AC=2;AN=4;DP4=66,1,23,0;MQ=20	GT:PL:DP:DV:SP:DP4	0/1:113,0,107:31:9:0:22,0,9,0	0/1:89,0,141:59:14:0:44,1,14,0
Locus_2_Transcript_1303/4817_Confidence_1.000_Length_326	76	.	A	G	218	PASS	DP=43;VDB=0.000851528;SGB=-7.79183;RPB=0.573544;MQB=0.69582;BQB=0.888322;MQ0F=0;ICB=0.5;HOB=0.5;AC=2;AN=4;DP4=12,0,19,0;MQ=41	GT:PL:DP:DV:SP:DP4	0/1:107,0,88:8:4:0:4,0,4,0	0/1:175,0,136:23:15:0:8,0,15,0
Locus_2_Transcript_1303/4817_Confidence_1.000_Length_326	84	.	A	G	216	PASS	DP=47;VDB=0.00172453;SGB=-8.09869;RPB=0.69834;MQB=0.883646;BQB=0.875437;MQ0F=0;ICB=0.5;HOB=0.5;AC=2;AN=4;DP4=13,0,20,0;MQ=41	GT:PL:DP:DV:SP:DP4	0/1:107,0,98:8:4:0:4,0,4,0	0/1:173,0,138:25:16:0:9,0,16,0
Locus_2_Transcript_1303/4817_Confidence_1.000_Length_326	138	.	C	T	146	PASS	DP=63;VDB=0.661179;SGB=-5.64284;RPB=0.778123;MQB=0.953116;MQSB=0.928524;BQB=0.90065;MQ0F=0;ICB=0.5;HOB=0.5;AC=2;AN=4;DP4=26,2,11,1;MQ=41	GT:PL:DP:DV:SP:DP4	0/1:55,0,124:7:2:0:5,0,2,0	0/1:156,0,254:33:10:0:21,2,9,1
Locus_2_Transcript_1303/4817_Confidence_1.000_Length_326	140	.	T	C	93	PASS	DP=65;VDB=0.309361;SGB=-5.0263;RPB=0.980718;MQB=0.983547;MQSB=0.730769;BQB=0.913636;MQ0F=0;ICB=0.5;HOB=0.5;AC=2;AN=4;DP4=30,1,9,1;MQ=40	GT:PL:DP:DV:SP:DP4	0/1:21,0,138:7:1:0:6,0,1,0	0/1:139,0,219:34:9:3:24,1,8,1
Locus_2_Transcript_1303/4817_Confidence_1.000_Length_326	153	.	T	C	116	PASS	DP=64;VDB=0.898619;SGB=-5.3356;RPB=0.0550902;MQB=0.689272;MQSB=0.996228;BQB=0.062281;MQ0F=0;ICB=0.5;HOB=0.5;AC=2;AN=4;DP4=32,3,6,5;MQ=40	GT:PL:DP:DV:SP:DP4	0/1:42,0,173:9:2:11:6,1,0,2	0/1:141,0,243:37:9:11:26,2,6,3
Locus_2_Transcript_1314/4817_Confidence_1.000_Length_381	241	.	C	T	115	PASS	DP=30;VDB=0.0795002;SGB=3.31571;RPB=0.39742;MQB=0.447612;MQSB=0.977696;BQB=0.690645;MQ0F=0.1;ICB=0.3;HOB=0.125;AC=1;AN=4;DP4=9,2,5,2;MQ=33	GT:PL:DP:DV:SP:DP4	0/0:0,15,162:5:0:0:4,1,0,0	0/1:179,0,57:13:7:0:5,1,5,2
Locus_2_Transcript_1315/4817_Confidence_1.000_Length_344	250	.	C	T	106	PASS	DP=55;VDB=0.00756578;SGB=0.69007;RPB=0.587745;MQB=0.124488;MQSB=0.0889216;BQB=0.926128;MQ0F=0.290909;AC=4;AN=4;DP4=5,2,15,13;MQ=9	GT:PL:DP:DV:SP:DP4	1/1:27,8,0:5:4:0:1,0,3,1	1/1:134,32,0:30:24:2:4,2,12,12
Locus_2_Transcript_1316/4817_Confidence_1.000_Length_227	90	.	C	T	87	PASS	DP=106;VDB=0.0423129;SGB=-15.4632;RPB=0.857694;MQB=0.0184128;BQB=0.09845;MQ0F=0.207547;ICB=0.3;HOB=0.125;AC=3;AN=4;DP4=21,0,44,0;MQ=12	GT:PL:DP:DV:SP:DP4	0/1:76,0,50:19:13:0:6,0,13,0	1/1:74,2,0:46:31:0:15,0,31,0
Locus_2_Transcript_1316/4817_Confidence_1.000_Length_227	103	.	G	A	90	PASS	DP=138;VDB=0.156279;SGB=-0.65343;RPB=0.927608;MQB=0.078201;BQB=0.850005;MQ0F=0.173913;ICB=0.3;HOB=0.125;AC=3;AN=4;DP4=5,0,65,0;MQ=13	GT:PL:DP:DV:SP:DP4	0/1:70,0,36:21:17:0:4,0,17,0	1/1:85,111,0:49:48:0:1,0,48,0
Locus_2_Transcript_1316/4817_Confidence_1.000_Length_227	112	.	G	A	77	PASS	DP=145;VDB=0.32635;SGB=-1.12964;RPB=0.965078;MQB=0.00511811;BQB=0.98948;MQ0F=0.193103;ICB=0.3;HOB=0.125;AC=3;AN=4;DP4=4,0,69,0;MQ=13	GT:PL:DP:DV:SP:DP4	0/1:57,0,24:23:20:0:3,0,20,0	1/1:85,114,0:50:49:0:1,0,49,0
Locus_2_Transcript_1316/4817_Confidence_1.000_Length_227	138	.	C	A	132	PASS	DP=130;VDB=1.11258e-06;SGB=-1.24531;RPB=0.441401;MQB=0.989268;MQSB=0.0325975;BQB=0.858192;MQ0F=0.184615;ICB=0.3;HOB=0.125;AC=3;AN=4;DP4=7,2,51,11;MQ=13	GT:PL:DP:DV:SP:DP4	0/1:67,0,31:23:19:0:4,0,18,1	1/1:129,63,0:48:43:2:3,2,33,10
Locus_2_Transcript_1316/4817_Confidence_1.000_Length_227	167	.	T	C	183	PASS	DP=109;VDB=3.10246e-08;SGB=-16.3837;RPB=0.215835;MQB=0.0174448;MQSB=0.0694264;BQB=0.832671;MQ0F=0.174312;ICB=0.5;HOB=0.5;AC=2;AN=4;DP4=14,8,26,21;MQ=13	GT:PL:DP:DV:SP:DP4	0/1:114,0,45:23:16:0:5,2,12,4	0/1:134,0,7:46:31:3:9,6,14,17
Locus_2_Transcript_1316/4817_Confidence_1.000_Length_227	194	.	C	T	173	PASS	DP=75;VDB=2.97199e-11;SGB=-13.6221;RPB=0.97455;MQB=0.632213;MQSB=0.683971;BQB=0.0693617;MQ0F=0.133333;ICB=0.3;HOB=0.125;AC=3;AN=4;DP4=1,14,19,19;MQ=14	GT:PL:DP:DV:SP:DP4	1/1:115,1,0:18:15:7:0,3,9,6	0/1:120,0,38:35:23:13:1,11,10,13
Locus_2_Transcript_1317/4817_Confidence_1.000_Length_854	363	.	C	T	170	PASS	DP=18;VDB=0.355721;SGB=5.07446;RPB=0.966484;MQB=0.966484;MQSB=0.868815;BQB=0.991513;MQ0F=0;ICB=0.3;HOB=0.125;AC=1;AN=4;DP4=2,2,7,4;MQ=41	GT:PL:DP:DV:SP:DP4	0/0:0,3,42:1:0:0:1,0,0,0	0/1:233,0,55:14:11:3:1,2,7,4
Locus_2_Transcript_1317/4817_Confidence_1.000_Length_854	496	.	G	T	142	PASS	DP=36;VDB=0.890922;SGB=4.69269;RPB=0.488571;MQB=0.696556;MQSB=0.995323;BQB=0.303926;MQ0F=0;ICB=0.3;HOB=0.125;AC=1;AN=4;DP4=11,3,4,5;MQ=38	GT:PL:DP:DV:SP:DP4	0/0:0,6,10:2:0:0:2,0,0,0	0/1:206,0,251:21:9:7:9,3,4,5
Locus_2_Transcript_1317/4817_Confidence_1.000_Length_854	582	.	T	G	201	PASS	DP=37;VDB=0.387944;SGB=-8.09863;RPB=0.817056;MQB=0.71818;MQSB=0.763202;BQB=0.460158;MQ0F=0;ICB=0.3;HOB=0.125;AC=3;AN=4;DP4=2,6,12,8;MQ=37	GT:PL:DP:DV:SP:DP4	1/1:10,6,0:2:2:0:0,0,0,2	0/1:255,0,146:26:18:10:2,6,12,6
Locus_2_Transcript_1321/4817_Confidence_1.000_Length_369	259	.	A	T	101	PASS	DP=46;VDB=0.013764;SGB=10.2282;RPB=0.246288;MQB=0.00153795;MQSB=0.32634;BQB=0.45466;MQ0F=0;ICB=0.3;HOB=0.125;AC=1;AN=4;DP4=5,8,11,6;MQ=29	GT:PL:DP:DV:SP:DP4	0/0:0,30,255:10:0:0:4,6,0,0	0/1:166,0,9:20:17:3:1,2,11,6
Locus_2_Transcript_1321/4817_Confidence_1.000_Length_369	263	.	A	G	106	PASS	DP=47;VDB=0.0122215;SGB=10.2282;RPB=0.169059;MQB=0.00881047;MQSB=0.541994;BQB=0.320586;MQ0F=0.0212766;ICB=0.3;HOB=0.125;AC=1;AN=4;DP4=5,9,11,6;MQ=28	GT:PL:DP:DV:SP:DP4	0/0:0,30,255:10:0:0:4,6,0,0	0/1:171,0,12:21:17:6:1,3,11,6
Locus_2_Transcript_1321/4817_Confidence_1.000_Length_369	272	.	A	G	155	PASS	DP=45;VDB=0.121305;SGB=11.6141;RPB=0.683766;MQB=0.00812584;MQSB=0.340099;BQB=0.954795;MQ0F=0.0222222;ICB=0.5;HOB=0.5;AC=2;AN=4;DP4=4,8,10,9;MQ=28	GT:PL:DP:DV:SP:DP4	0/0:0,30,255:10:0:0:3,7,0,0	1/1:224,40,0:21:19:0:1,1,10,9
Locus_2_Transcript_1321/4817_Confidence_1.000_Length_369	284	.	T	C	137	PASS	DP=41;VDB=0.15753;SGB=11.6141;RPB=0.96866;MQB=7.48518e-05;MQSB=0.0820649;BQB=0.156165;MQ0F=0.0243902;ICB=0.5;HOB=0.5;AC=2;AN=4;DP4=1,9,11,8;MQ=28	GT:PL:DP:DV:SP:DP4	0/0:0,30,206:10:0:0:1,9,0,0	1/1:206,57,0:19:19:0:0,0,11,8
Locus_2_Transcript_1321/4817_Confidence_1.000_Length_369	309	.	A	C	118	PASS	DP=30;VDB=0.00125786;SGB=9.53539;RPB=0.446729;MQB=0.000911882;MQSB=0.293758;BQB=0.991111;MQ0F=0.0333333;ICB=0.5;HOB=0.5;AC=2;AN=4;DP4=1,6,4,12;MQ=27	GT:PL:DP:DV:SP:DP4	0/0:0,21,183:7:0:0:1,6,0,0	1/1:187,48,0:16:16:0:0,0,4,12
Locus_2_Transcript_1322/4817_Confidence_1.000_Length_526	162	.	T	A	62	PASS	DP=30;VDB=0.482159;SGB=-4.10417;RPB=0.817714;MQB=0.950934;MQSB=1;BQB=0.198786;MQ0F=0;ICB=0.5;HOB=0.5;AC=2;AN=4;DP4=15,0,6,1;MQ=39	GT:PL:DP:DV:SP:DP4	0/1:94,0,74:8:5:0:3,0,5,0	0/1:32,0,163:14:2:0:12,0,1,1
Locus_2_Transcript_1322/4817_Confidence_1.000_Length_526	186	.	C	G	100	PASS	DP=35;VDB=0.574591;SGB=-5.95055;RPB=0.198432;MQB=0.685969;MQSB=0.833333;BQB=0.95306;MQ0F=0;ICB=0.5;HOB=0.5;AC=2;AN=4;DP4=9,1,12,1;MQ=39	GT:PL:DP:DV:SP:DP4	0/1:57,0,105:8:4:0:4,0,4,0	0/1:107,0,141:15:9:0:5,1,8,1
Locus_2_Transcript_1322/4817_Confidence_1.000_Length_526	197	.	T	C	211	PASS	DP=32;VDB=0.519344;SGB=-5.64336;RPB=0.947103;MQB=0.419134;MQSB=0.985612;BQB=0.050992;MQ0F=0;ICB=0.5;HOB=0.5;AC=2;AN=4;DP4=10,0,8,4;MQ=39	GT:PL:DP:DV:SP:DP4	0/1:81,0,128:8:3:0:5,0,2,1	0/1:193,0,111:14:9:6:5,0,6,3
Locus_2_Transcript_1322/4817_Confidence_1.000_Length_526	352	.	T	C	177	PASS	DP=25;VDB=0.620674;SGB=-5.02916;RPB=0.263597;MQB=0.692463;MQSB=0.692463;BQB=0.668089;MQ0F=0;ICB=0.5;HOB=0.5;AC=2;AN=4;DP4=5,4,4,6;MQ=38	GT:PL:DP:DV:SP:DP4	0/1:79,0,53:5:3:0:0,2,0,3	0/1:162,0,150:14:7:0:5,2,4,3
Locus_2_Transcript_1323/4817_Confidence_1.000_Length_316	43	.	A	G	114	PASS	DP=64;VDB=4.79826e-32;SGB=-1.03149;RPB=0.496947;MQB=0.0152342;BQB=0.994059;MQ0F=0.015625;AC=4;AN=4;DP4=3,0,53,0;MQ=18	GT:PL:DP:DV:SP:DP4	1/1:109,45,0:15:15:0:0,0,15,0	1/1:60,24,0:41:38:0:3,0,38,0
Locus_2_Transcript_1323/4817_Confidence_1.000_Length_316	54	.	G	A	87	PASS	DP=96;VDB=5.10511e-23;SGB=-0.434343;RPB=0.444332;MQB=0.00115827;BQB=0.847169;MQ0F=0.03125;AC=4;AN=4;DP4=5,0,67,0;MQ=19	GT:PL:DP:DV:SP:DP4	1/1:110,51,0:17:17:0:0,0,17,0	1/1:32,22,0:55:50:0:5,0,50,0
Locus_2_Transcript_1323/4817_Confidence_1.000_Length_316	96	.	G	C	69	PASS	DP=155;VDB=3.71204e-08;SGB=-23.7482;RPB=0.928045;MQB=0.00101754;MQSB=1;BQB=0.72677;MQ0F=0.0322581;ICB=0.5;HOB=0.5;AC=2;AN=4;DP4=29,1,71,0;MQ=19	GT:PL:DP:DV:SP:DP4	0/1:62,0,98:25:11:0:14,0,11,0	0/1:70,0,59:76:60:0:15,1,60,0
Locus_2_Transcript_1323/4817_Confidence_1.000_Length_316	101	.	C	G	109	PASS	DP=159;VDB=3.60012e-05;SGB=0.000849039;RPB=0.664522;MQB=0.000978693;MQSB=1;BQB=0.396649;MQ0F=0.0314465;AC=4;AN=4;DP4=5,0,98,1;MQ=19	GT:PL:DP:DV:SP:DP4	1/1:82,36,0:26:25:0:1,0,25,0	1/1:82,95,0:78:74:0:4,0,73,1
Locus_2_Transcript_1323/4817_Confidence_1.000_Length_316	112	.	A	C	95	PASS	DP=173;VDB=0.00067756;SGB=-26.203;RPB=0.960694;MQB=0.00395223;MQSB=1;BQB=0.302608;MQ0F=0.0289017;ICB=0.5;HOB=0.5;AC=2;AN=4;DP4=32,0,78,1;MQ=20	GT:PL:DP:DV:SP:DP4	0/1:79,0,101:30:13:0:17,0,13,0	0/1:80,0,30:81:66:0:15,0,65,1
Locus_2_Transcript_1323/4817_Confidence_1.000_Length_316	138	.	T	C	142	PASS	DP=210;VDB=0.970202;SGB=-30.8058;RPB=0.952443;MQB=0.0348512;MQSB=0.648619;BQB=0.490231;MQ0F=0.0238095;ICB=0.5;HOB=0.5;AC=2;AN=4;DP4=33,3,87,7;MQ=22	GT:PL:DP:DV:SP:DP4	0/1:106,0,114:32:14:2:17,1,12,2	0/1:100,0,54:98:80:2:16,2,75,5
Locus_2_Transcript_1323/4817_Confidence_1.000_Length_316	168	.	C	T	293	PASS	DP=179;VDB=0.907054;SGB=-31.1127;RPB=0.999325;MQB=0.513397;MQSB=0.00822445;BQB=0.0657663;MQ0F=0.0167598;ICB=0.5;HOB=0.5;AC=2;AN=4;DP4=21,14,59,36;MQ=24	GT:PL:DP:DV:SP:DP4	0/1:156,0,166:32:16:2:12,4,10,6	0/1:201,0,93:98:79:5:9,10,49,30
Locus_2_Transcript_1323/4817_Confidence_1.000_Length_316	182	.	C	T	73	PASS	DP=176;VDB=0.00650877;SGB=-10.2467;RPB=0.968453;MQB=0.989117;MQSB=0.0288772;BQB=0.373966;MQ0F=0.0113636;ICB=0.3;HOB=0.125;AC=1;AN=4;DP4=62,42,17,10;MQ=25	GT:PL:DP:DV:SP:DP4	0/1:135,0,213:33:14:3:12,7,11,3	0/0:0,1,229:98:13:3:50,35,6,7
Locus_2_Transcript_1323/4817_Confidence_1.000_Length_316	213	.	G	A	81	PASS	DP=189;VDB=0.0298006;SGB=-9.32613;RPB=0.0372423;MQB=0.604225;MQSB=0.0310039;BQB=0.989164;MQ0F=0.031746;ICB=0.3;HOB=0.125;AC=1;AN=4;DP4=54,42,15,9;MQ=26	GT:PL:DP:DV:SP:DP4	0/1:145,0,193:27:14:2:9,4,11,3	0/0:0,50,255:93:10:3:45,38,4,6
Locus_2_Transcript_1323/4817_Confidence_1.000_Length_316	234	.	G	T	80	PASS	DP=155;VDB=0.0155327;SGB=-6.87123;RPB=0.0742199;MQB=0.75935;MQSB=0.0209648;BQB=0.263056;MQ0F=0.0322581;ICB=0.3;HOB=0.125;AC=1;AN=4;DP4=46,41,6,10;MQ=27	GT:PL:DP:DV:SP:DP4	0/1:144,0,168:21:12:7:6,3,4,8	0/0:0,125,255:82:4:0:40,38,2,2
Locus_2_Transcript_1323/4817_Confidence_1.000_Length_316	263	.	C	G	112	PASS	DP=105;VDB=1.70492e-05;SGB=-8.09853;RPB=0.432193;MQB=0.803136;MQSB=0.910057;BQB=0.999578;MQ0F=0.047619;ICB=0.3;HOB=0.125;AC=1;AN=4;DP4=21,36,7,13;MQ=27	GT:PL:DP:DV:SP:DP4	0/0:0,5,188:14:1:0:9,4,0,1	0/1:176,0,255:63:19:3:12,32,7,12
Locus_2_Transcript_1324/4817_Confidence_1.000_Length_260	61	.	C	A	158	PASS	DP=170;VDB=2.84015e-17;SGB=-0.821499;RPB=0.667677;MQB=0.0159128;BQB=0.593152;MQ0F=0.111765;AC=4;AN=4;DP4=4,0,117,0;MQ=15	GT:PL:DP:DV:SP:DP4	1/1:75,59,0:33:32:0:1,0,32,0	1/1:138,169,0:88:85:0:3,0,85,0
Locus_2_Transcript_1324/4817_Confidence_1.000_Length_260	88	.	C	T	163	PASS	DP=241;VDB=7.94961e-05;SGB=0.112674;RPB=0.746529;MQB=0.00974713;BQB=0.457414;MQ0F=0.186722;AC=4;AN=4;DP4=5,0,150,0;MQ=16	GT:PL:DP:DV:SP:DP4	1/1:87,80,0:40:39:0:1,0,39,0	1/1:131,220,0:115:111:0:4,0,111,0
Locus_2_Transcript_1324/4817_Confidence_1.000_Length_260	95	.	A	G	117	PASS	DP=245;VDB=0.00071887;SGB=-0.173487;RPB=0.975795;MQB=0.00277585;BQB=0.404149;MQ0F=0.187755;AC=4;AN=4;DP4=10,0,148,0;MQ=16	GT:PL:DP:DV:SP:DP4	1/1:78,80,0:40:39:0:1,0,39,0	1/1:94,137,0:118:109:0:9,0,109,0
Locus_2_Transcript_1324/4817_Confidence_1.000_Length_260	118	.	T	C	77	PASS	DP=258;VDB=0.0126802;SGB=5.86061;RPB=0.997409;MQB=0.00121225;MQSB=0.0238571;BQB=0.343972;MQ0F=0.178295;ICB=0.3;HOB=0.125;AC=3;AN=4;DP4=25,1,120,18;MQ=17	GT:PL:DP:DV:SP:DP4	0/1:45,0,84:38:27:0:11,0,25,2	1/1:96,67,0:126:111:2:14,1,95,16
Locus_2_Transcript_1324/4817_Confidence_1.000_Length_260	148	.	T	G	417	PASS	DP=248;VDB=0.549909;SGB=0.687398;RPB=0.869017;MQB=0.00328208;MQSB=0.627642;BQB=0.756844;MQ0F=0.16129;AC=4;AN=4;DP4=2,4,89,61;MQ=17	GT:PL:DP:DV:SP:DP4	1/1:217,80,0:39:38:0:0,1,21,17	1/1:255,185,0:117:112:4:2,3,68,44
Locus_2_Transcript_1324/4817_Confidence_1.000_Length_260	161	.	A	G	350	PASS	DP=226;VDB=0.352049;SGB=-36.636;RPB=0.0123477;MQB=0.977398;MQSB=0.738839;BQB=0.904349;MQ0F=0.172566;ICB=0.5;HOB=0.5;AC=2;AN=4;DP4=20,20,53,60;MQ=17	GT:PL:DP:DV:SP:DP4	0/1:194,0,35:38:23:10:10,5,8,15	0/1:222,0,98:115:90:3:10,15,45,45
Locus_2_Transcript_1324/4817_Confidence_1.000_Length_260	200	.	C	G	405	PASS	DP=135;VDB=6.86765e-21;SGB=3.45967;RPB=0.377165;MQB=0.0565872;MQSB=0.017265;BQB=0.878264;MQ0F=0.111111;AC=4;AN=4;DP4=1,2,23,81;MQ=22	GT:PL:DP:DV:SP:DP4	1/1:205,63,0:21:21:0:0,0,3,18	1/1:255,147,0:86:83:0:1,2,20,63
Locus_2_Transcript_1324/4817_Confidence_1.000_Length_260	217	.	G	C	401	PASS	DP=109;VDB=2.10191e-19;SGB=1.34905;RPB=0.845597;MQB=0.497784;MQSB=0.0964581;BQB=0.802701;MQ0F=0.0183486;AC=4;AN=4;DP4=1,6,18,64;MQ=25	GT:PL:DP:DV:SP:DP4	1/1:224,54,0:18:18:0:0,0,3,15	1/1:232,18,0:71:64:0:1,6,15,49
Locus_2_Transcript_1324/4817_Confidence_1.000_Length_260	254	.	C	G	86	PASS	DP=24;VDB=6.31438e-06;SGB=-1.13854;RPB=1;MQB=1;MQSB=0.944444;BQB=1;MQ0F=0.0833333;AC=4;AN=4;DP4=0,1,2,8;MQ=18	GT:PL:DP:DV:SP:DP4	1/1:64,12,0:4:4:0:0,0,0,4	1/1:77,11,0:7:6:0:0,1,2,4
Locus_2_Transcript_1328/4817_Confidence_1.000_Length_310	44	.	C	T	119	PASS	DP=19;VDB=0.00907312;SGB=-4.41469;RPB=0.377804;MQB=0.890706;BQB=1;MQ0F=0;ICB=0.5;HOB=0.5;AC=2;AN=4;DP4=9,0,8,0;MQ=38	GT:PL:DP:DV:SP:DP4	0/1:91,0,85:8:4:0:4,0,4,0	0/1:91,0,109:9:4:0:5,0,4,0
Locus_2_Transcript_1328/4817_Confidence_1.000_Length_310	170	.	C	T	61	PASS	DP=82;VDB=0.961412;SGB=-6.25731;RPB=0.999835;MQB=0.018944;MQSB=0.956301;BQB=0.991943;MQ0F=0;ICB=0.5;HOB=0.5;AC=2;AN=4;DP4=31,13,10,4;MQ=34	GT:PL:DP:DV:SP:DP4	0/1:32,0,255:22:3:16:15,4,0,3	0/1:97,0,255:36:11:9:16,9,10,1
Locus_2_Transcript_1328/4817_Confidence_1.000_Length_310	200	.	G	C	367	PASS	DP=67;VDB=0.0741669;SGB=-8.71242;RPB=0.348988;MQB=0.00324234;MQSB=0.564666;BQB=0.0457568;MQ0F=0;ICB=0.5;HOB=0.5;AC=2;AN=4;DP4=9,10,17,5;MQ=34	GT:PL:DP:DV:SP:DP4	0/1:199,0,67:15:11:24:0,4,10,1	0/1:232,0,201:26:11:0:9,6,7,4
Locus_2_Transcript_1328/4817_Confidence_1.000_Length_310	203	.	T	A	74	PASS	DP=62;VDB=0.000577132;SGB=-5.02822;RPB=0.902523;MQB=0.405777;MQSB=0.45107;BQB=0.0122474;MQ0F=0;ICB=0.5;HOB=0.5;AC=2;AN=4;DP4=24,6,2,8;MQ=34	GT:PL:DP:DV:SP:DP4	0/1:27,0,220:14:2:12:10,2,0,2	0/1:114,0,255:26:8:16:14,4,2,6
Locus_2_Transcript_1328/4817_Confidence_1.000_Length_310	214	.	T	A	122	PASS	DP=63;VDB=9.07136e-06;SGB=-5.3356;RPB=0.469636;MQB=0.205936;MQSB=0.788729;BQB=0.21208;MQ0F=0;ICB=0.5;HOB=0.5;AC=2;AN=4;DP4=19,7,4,7;MQ=34	GT:PL:DP:DV:SP:DP4	0/1:27,0,220:14:2:12:10,2,0,2	0/1:160,0,241:23:9:4:9,5,4,5
Locus_2_Transcript_1333/4817_Confidence_1.000_Length_586	325	.	C	T	110	PASS	DP=60;VDB=0.0134856;SGB=10.9211;RPB=0.925303;MQB=0.874233;MQSB=0.0415341;BQB=0.39189;MQ0F=0.05;ICB=0.3;HOB=0.125;AC=1;AN=4;DP4=14,17,15,3;MQ=30	GT:PL:DP:DV:SP:DP4	0/0:0,33,224:11:0:0:4,7,0,0	0/1:174,0,255:38:18:14:10,10,15,3
Locus_2_Transcript_1333/4817_Confidence_1.000_Length_586	335	.	A	C	141	PASS	DP=60;VDB=0.169248;SGB=-9.63296;RPB=0.980964;MQB=0.549806;MQSB=0.0676029;BQB=0.717299;MQ0F=0.05;ICB=0.5;HOB=0.5;AC=2;AN=4;DP4=10,13,20,5;MQ=31	GT:PL:DP:DV:SP:DP4	0/1:14,0,197:11:2:3:4,5,0,2	0/1:191,0,221:37:23:21:6,8,20,3
Locus_2_Transcript_1346/4817_Confidence_1.000_Length_247	187	.	G	A	90	PASS	DP=151;VDB=4.85133e-12;SGB=-1.38627;RPB=0.134204;MQB=7.00244e-05;MQSB=0.0403114;BQB=0.449277;MQ0F=0.112583;ICB=0.3;HOB=0.125;AC=3;AN=4;DP4=6,1,54,28;MQ=11	GT:PL:DP:DV:SP:DP4	1/1:106,96,0:46:45:0:1,0,30,15	0/1:48,0,60:43:37:2:5,1,24,13
Locus_2_Transcript_1349/4817_Confidence_1.000_Length_262	143	.	G	A	201	PASS	DP=345;VDB=0.0142009;SGB=-1.38629;RPB=0.389412;MQB=0.000193609;MQSB=0.000562851;BQB=0.744136;MQ0F=0.0724638;AC=4;AN=4;DP4=6,0,159,27;MQ=15	GT:PL:DP:DV:SP:DP4	1/1:65,81,0:85:79:2:6,0,67,12	1/1:191,255,0:107:107:0:0,0,92,15
Locus_2_Transcript_1349/4817_Confidence_1.000_Length_262	199	.	A	G	216	PASS	DP=201;VDB=7.44712e-22;SGB=-1.38592;RPB=0.0247979;MQB=0.446328;MQSB=0.579522;BQB=0.623386;MQ0F=0.0845771;ICB=0.3;HOB=0.125;AC=3;AN=4;DP4=3,11,54,63;MQ=17	GT:PL:DP:DV:SP:DP4	0/1:128,0,17:50:43:4:2,5,20,23	1/1:152,105,0:81:74:9:1,6,34,40
Locus_2_Transcript_1349/4817_Confidence_1.000_Length_262	202	.	C	T	342	PASS	DP=184;VDB=1.80202e-22;SGB=-1.38586;RPB=0.16;MQB=0;MQSB=0.842625;BQB=0.34;MQ0F=0.0380435;AC=4;AN=4;DP4=0,2,54,71;MQ=17	GT:PL:DP:DV:SP:DP4	1/1:178,80,0:47:45:3:0,2,19,26	1/1:219,241,0:80:80:0:0,0,35,45
Locus_2_Transcript_1349/4817_Confidence_1.000_Length_262	208	.	G	A	233	PASS	DP=178;VDB=3.89494e-24;SGB=-1.38529;RPB=0.971838;MQB=0.208016;MQSB=0.798251;BQB=0.0856133;MQ0F=0.0337079;AC=4;AN=4;DP4=0,12,51,64;MQ=17	GT:PL:DP:DV:SP:DP4	1/1:131,3,0:47:41:12:0,6,19,22	1/1:157,118,0:80:74:11:0,6,32,42
Locus_2_Transcript_1349/4817_Confidence_1.000_Length_262	217	.	C	T	207	PASS	DP=150;VDB=1.84214e-16;SGB=-1.37952;RPB=0.989436;MQB=0.1728;MQSB=0.544779;BQB=0.961829;MQ0F=0.0333333;ICB=0.3;HOB=0.125;AC=3;AN=4;DP4=6,12,35,54;MQ=18	GT:PL:DP:DV:SP:DP4	0/1:142,0,53:38:31:10:5,2,10,21	1/1:129,20,0:69:58:14:1,10,25,33
Locus_2_Transcript_1357/4817_Confidence_1.000_Length_302	275	.	C	T	85	PASS	DP=53;VDB=6.64645e-12;SGB=-1.29327;RPB=0.913636;MQB=0.0220128;MQSB=0.381973;BQB=0.393301;MQ0F=0.226415;ICB=0.3;HOB=0.125;AC=3;AN=4;DP4=0,3,19,12;MQ=13	GT:PL:DP:DV:SP:DP4	1/1:103,26,0:21:20:0:0,1,14,6	0/1:46,0,30:13:11:3:0,2,5,6
Locus_2_Transcript_1359/4817_Confidence_1.000_Length_244	108	.	C	T	68	PASS	DP=40;VDB=0.0763459;SGB=-4.09964;RPB=0.269836;MQB=0.337407;BQB=0.801741;MQ0F=0;ICB=0.5;HOB=0.5;AC=2;AN=4;DP4=19,0,7,0;MQ=32	GT:PL:DP:DV:SP:DP4	0/1:27,0,66:5:1:0:4,0,1,0	0/1:106,0,163:21:6:0:15,0,6,0
Locus_2_Transcript_1359/4817_Confidence_1.000_Length_244	167	.	A	G	80	PASS	DP=38;VDB=0.00242867;SGB=-4.72185;RPB=0.612146;MQB=0.236382;MQSB=0.367879;BQB=0.493254;MQ0F=0;ICB=0.5;HOB=0.5;AC=2;AN=4;DP4=7,9,6,3;MQ=33	GT:PL:DP:DV:SP:DP4	0/1:33,0,64:5:3:0:1,1,3,0	0/1:111,0,255:20:6:0:6,8,3,3
Locus_2_Transcript_1361/4817_Confidence_1.000_Length_254	114	.	A	T	100	PASS	DP=84;VDB=0.0013348;SGB=-5.64284;RPB=0.68221;MQB=0.370929;BQB=0.191822;MQ0F=0;ICB=0.3;HOB=0.125;AC=1;AN=4;DP4=38,0,12,0;MQ=35	GT:PL:DP:DV:SP:DP4	0/1:165,0,70:13:10:0:3,0,10,0	0/0:0,36,170:37:2:0:35,0,2,0
Locus_2_Transcript_1361/4817_Confidence_1.000_Length_254	202	.	C	T	138	PASS	DP=48;VDB=0.00699122;SGB=-6.56435;RPB=0.83937;MQB=0.56529;MQSB=0.973145;BQB=0.22313;MQ0F=0;ICB=0.3;HOB=0.125;AC=1;AN=4;DP4=6,18,3,12;MQ=35	GT:PL:DP:DV:SP:DP4	0/1:203,0,55:14:11:0:0,3,3,8	0/0:0,19,255:25:4:3:6,15,0,4
Locus_2_Transcript_1362/4817_Confidence_1.000_Length_346	65	.	G	A	104	PASS	DP=48;VDB=0.141325;SGB=-7.1777;RPB=0.145098;MQB=0.987474;BQB=0.987474;MQ0F=0.0416667;ICB=0.3;HOB=0.125;AC=1;AN=4;DP4=14,0,17,0;MQ=36	GT:PL:DP:DV:SP:DP4	0/0:0,22,182:11:1:0:10,0,1,0	0/1:169,0,49:20:16:0:4,0,16,0
Locus_2_Transcript_1362/4817_Confidence_1.000_Length_346	101	.	A	T	223	PASS	DP=68;VDB=0.104794;SGB=-8.71242;RPB=0.869825;MQB=0.467995;BQB=0.551198;MQ0F=0.0294118;ICB=0.5;HOB=0.5;AC=2;AN=4;DP4=22,0,22,0;MQ=37	GT:PL:DP:DV:SP:DP4	0/1:172,0,83:18:13:0:5,0,13,0	0/1:114,0,186:26:9:0:17,0,9,0
Locus_2_Transcript_1362/4817_Confidence_1.000_Length_346	116	.	A	T	299	PASS	DP=80;VDB=0.386347;SGB=-1.38413;RPB=0.285073;MQB=0.994094;MQSB=0.0242371;BQB=0.662745;MQ0F=0.0125;ICB=0.5;HOB=0.5;AC=2;AN=4;DP4=8,1,41,2;MQ=38	GT:PL:DP:DV:SP:DP4	0/1:181,0,13:22:20:0:2,0,19,1	0/1:186,0,94:30:23:4:6,1,22,1
Locus_2_Transcript_1363/4817_Confidence_1.000_Length_422	44	.	T	C	133	PASS	DP=26;VDB=0.015625;SGB=-5.3363;RPB=0.422203;MQB=0.663573;BQB=0.245705;MQ0F=0;ICB=0.3;HOB=0.125;AC=3;AN=4;DP4=7,0,11,0;MQ=33	GT:PL:DP:DV:SP:DP4	0/1:56,0,125:10:3:0:7,0,3,0	1/1:142,24,0:8:8:0:0,0,8,0
Locus_2_Transcript_1363/4817_Confidence_1.000_Length_422	51	.	C	T	90	PASS	DP=26;VDB=0.0207224;SGB=-4.72062;RPB=0.997478;MQB=0.960401;BQB=0.63114;MQ0F=0;ICB=0.5;HOB=0.5;AC=2;AN=4;DP4=12,0,9,0;MQ=33	GT:PL:DP:DV:SP:DP4	0/1:39,0,125:10:2:0:8,0,2,0	0/1:114,0,60:11:7:0:4,0,7,0
Locus_2_Transcript_1363/4817_Confidence_1.000_Length_422	116	.	T	C	253	PASS	DP=59;VDB=0.0664495;SGB=-10.2467;RPB=0.604414;MQB=0.0031377;MQSB=0.0641026;BQB=0.966467;MQ0F=0;ICB=0.5;HOB=0.5;AC=2;AN=4;DP4=13,1,26,1;MQ=36	GT:PL:DP:DV:SP:DP4	0/1:159,0,26:16:14:0:2,0,13,1	0/1:159,0,184:25:13:0:11,1,13,0
Locus_2_Transcript_1363/4817_Confidence_1.000_Length_422	125	.	G	A	189	PASS	DP=62;VDB=0.0193428;SGB=-7.17815;RPB=0.18172;MQB=0.370586;MQSB=0.0526316;BQB=0.834311;MQ0F=0;ICB=0.5;HOB=0.5;AC=2;AN=4;DP4=22,1,16,1;MQ=37	GT:PL:DP:DV:SP:DP4	0/1:158,0,87:16:10:0:6,0,9,1	0/1:94,0,204:24:7:0:16,1,7,0
Locus_2_Transcript_1363/4817_Confidence_1.000_Length_422	130	.	T	C	237	PASS	DP=70;VDB=0.0410501;SGB=-9.93983;RPB=0.0667615;MQB=0.000321408;MQSB=0.0568182;BQB=0.852454;MQ0F=0;ICB=0.5;HOB=0.5;AC=2;AN=4;DP4=19,1,25,1;MQ=37	GT:PL:DP:DV:SP:DP4	0/1:153,0,74:18:14:0:4,0,13,1	0/1:148,0,203:28:12:0:15,1,12,0
Locus_2_Transcript_1363/4817_Confidence_1.000_Length_422	198	.	C	T	299	PASS	DP=81;VDB=0.602721;SGB=-9.63298;RPB=0.81904;MQB=0.0331849;MQSB=0.0198387;BQB=0.193249;MQ0F=0;ICB=0.5;HOB=0.5;AC=2;AN=4;DP4=23,4,16,9;MQ=39	GT:PL:DP:DV:SP:DP4	0/1:180,0,120:18:13:3:4,1,12,1	0/1:182,0,255:34:12:23:19,3,4,8
Locus_2_Transcript_1363/4817_Confidence_1.000_Length_422	279	.	A	G	348	PASS	DP=85;VDB=0.934547;SGB=-9.01927;RPB=0.807054;MQB=0.697852;MQSB=0.812695;BQB=0.783023;MQ0F=0;ICB=0.5;HOB=0.5;AC=2;AN=4;DP4=23,15,10,13;MQ=40	GT:PL:DP:DV:SP:DP4	0/1:163,0,255:27:8:2:11,8,6,2	0/1:249,0,255:34:15:13:12,7,4,11
Locus_2_Transcript_1363/4817_Confidence_1.000_Length_422	297	.	G	A	225	PASS	DP=80;VDB=0.445855;SGB=-6.5644;RPB=0.486102;MQB=0.891948;MQSB=0.505463;BQB=0.986182;MQ0F=0;ICB=0.5;HOB=0.5;AC=2;AN=4;DP4=22,11,12,3;MQ=39	GT:PL:DP:DV:SP:DP4	0/1:92,0,255:23:5:0:15,3,4,1	0/1:198,0,255:25:10:7:7,8,8,2
Locus_2_Transcript_1363/4817_Confidence_1.000_Length_422	317	.	C	T	207	PASS	DP=81;VDB=0.174829;SGB=-6.25755;RPB=0.145908;MQB=0.932361;MQSB=0.719239;BQB=0.71649;MQ0F=0.0246914;ICB=0.5;HOB=0.5;AC=2;AN=4;DP4=22,12,11,3;MQ=38	GT:PL:DP:DV:SP:DP4	0/1:112,0,255:23:6:6:12,5,6,0	0/1:160,0,255:25:8:0:10,7,5,3
Locus_2_Transcript_1365/4817_Confidence_1.000_Length_273	61	.	A	G	65	PASS	DP=21;VDB=0.00324447;SGB=-1.18153;MQ0F=0.047619;AC=4;AN=4;DP4=0,0,10,0;MQ=19	GT:PL:DP:DV:SP:DP4	1/1:63,15,0:5:5:0:0,0,5,0	1/1:56,15,0:5:5:0:0,0,5,0
Locus_2_Transcript_1366/4817_Confidence_1.000_Length_223	74	.	G	C	151	PASS	DP=33;VDB=0.0928894;SGB=-1.19055;RPB=0.865554;MQB=0.066455;BQB=0.984085;MQ0F=0;ICB=0.3;HOB=0.125;AC=3;AN=4;DP4=4,0,17,0;MQ=27	GT:PL:DP:DV:SP:DP4	1/1:152,33,0:11:11:0:0,0,11,0	0/1:63,0,98:10:6:0:4,0,6,0
Locus_2_Transcript_1366/4817_Confidence_1.000_Length_223	111	.	A	C	222	PASS	DP=47;VDB=0.112371;SGB=-6.87128;RPB=0.193781;MQB=0.10502;MQSB=0.478261;BQB=0.998399;MQ0F=0;ICB=0.3;HOB=0.125;AC=3;AN=4;DP4=8,1,15,1;MQ=29	GT:PL:DP:DV:SP:DP4	0/1:99,0,115:13:6:0:6,1,6,0	1/1:187,18,0:12:10:0:2,0,9,1
Locus_2_Transcript_1370/4817_Confidence_1.000_Length_226	61	.	T	C	192	PASS	DP=91;VDB=9.38653e-08;SGB=-0.0741466;RPB=0.970187;MQB=0.0147829;MQSB=1;BQB=0.606204;MQ0F=0.0659341;AC=4;AN=4;DP4=3,0,58,1;MQ=22	GT:PL:DP:DV:SP:DP4	1/1:122,42,0:14:14:0:0,0,14,0	1/1:125,36,0:48:45:0:3,0,44,1
Locus_2_Transcript_1370/4817_Confidence_1.000_Length_226	68	.	T	G	141	PASS	DP=106;VDB=0.0534736;SGB=-9.63298;RPB=0.905661;MQB=0.576629;BQB=0.979505;MQ0F=0.0566038;ICB=0.5;HOB=0.5;AC=2;AN=4;DP4=43,0,25,0;MQ=21	GT:PL:DP:DV:SP:DP4	0/1:108,0,37:18:9:0:9,0,9,0	0/1:96,0,151:50:16:0:34,0,16,0
Locus_2_Transcript_1370/4817_Confidence_1.000_Length_226	75	.	A	G	213	PASS	DP=124;VDB=0.000228963;SGB=-0.992617;RPB=0.894748;MQB=0.0142642;BQB=0.987719;MQ0F=0.0483871;AC=4;AN=4;DP4=3,0,68,0;MQ=20	GT:PL:DP:DV:SP:DP4	1/1:147,57,0:19:19:0:0,0,19,0	1/1:121,48,0:52:49:0:3,0,49,0
Locus_2_Transcript_1370/4817_Confidence_1.000_Length_226	132	.	A	T	346	PASS	DP=113;VDB=1.0862e-11;SGB=-0.954176;RPB=0.147614;MQB=0.0144201;MQSB=0.0273237;BQB=0.937804;MQ0F=0.0353982;AC=4;AN=4;DP4=2,1,43,22;MQ=21	GT:PL:DP:DV:SP:DP4	1/1:164,54,0:18:18:0:0,0,15,3	1/1:237,34,0:50:47:0:2,1,28,19
Locus_2_Transcript_1370/4817_Confidence_1.000_Length_226	166	.	A	G	334	PASS	DP=67;VDB=1.71669e-14;SGB=-1.32836;RPB=0.890706;MQB=0.617753;MQSB=0.80348;BQB=0.457304;MQ0F=0.0447761;AC=4;AN=4;DP4=0,3,13,37;MQ=20	GT:PL:DP:DV:SP:DP4	1/1:191,51,0:17:17:0:0,0,6,11	1/1:198,28,0:36:33:0:0,3,7,26
Locus_2_Transcript_1373/4817_Confidence_1.000_Length_326	124	.	T	C	95	PASS	DP=74;VDB=0.049272;SGB=-1.37635;RPB=0.724403;MQB=5.1419e-05;MQSB=0.397727;BQB=1;MQ0F=0.0540541;ICB=0.3;HOB=0.125;AC=3;AN=4;DP4=8,1,36,1;MQ=17	GT:PL:DP:DV:SP:DP4	0/1:48,0,170:25:16:0:8,1,15,1	1/1:111,63,0:21:21:0:0,0,21,0
Locus_2_Transcript_1373/4817_Confidence_1.000_Length_326	166	.	T	C	263	PASS	DP=74;VDB=0.188128;SGB=-1.38256;RPB=0.6;MQB=0.08;MQSB=0.960189;BQB=0.34;MQ0F=0.027027;ICB=0.3;HOB=0.125;AC=3;AN=4;DP4=2,0,31,19;MQ=16	GT:PL:DP:DV:SP:DP4	0/1:136,0,10:23:21:3:2,0,10,11	1/1:189,87,0:29:29:0:0,0,21,8
Locus_2_Transcript_1373/4817_Confidence_1.000_Length_326	195	.	G	T	121	PASS	DP=56;VDB=0.136777;SGB=-1.10801;RPB=0.783333;MQB=0;MQSB=0.24115;BQB=0.6;MQ0F=0;ICB=0.3;HOB=0.125;AC=3;AN=4;DP4=2,0,23,7;MQ=15	GT:PL:DP:DV:SP:DP4	0/1:39,0,45:11:9:0:2,0,9,0	1/1:146,63,0:21:21:0:0,0,14,7
Locus_2_Transcript_1373/4817_Confidence_1.000_Length_326	212	.	G	A	102	PASS	DP=48;VDB=0.00761527;SGB=-1.15155;RPB=0.125724;MQB=0.0209806;MQSB=0.000294158;BQB=0.958563;MQ0F=0;ICB=0.3;HOB=0.125;AC=3;AN=4;DP4=3,0,13,16;MQ=15	GT:PL:DP:DV:SP:DP4	0/1:12,0,62:12:9:13:3,0,2,7	1/1:154,60,0:20:20:0:0,0,11,9
Locus_2_Transcript_1374/4817_Confidence_1.000_Length_321	182	.	T	C	137	PASS	DP=72;VDB=0.0497405;SGB=-1.3794;RPB=0.530237;MQB=0.00446376;MQSB=0.391772;BQB=0.551679;MQ0F=0.0694444;ICB=0.3;HOB=0.125;AC=3;AN=4;DP4=4,0,22,24;MQ=13	GT:PL:DP:DV:SP:DP4	1/1:90,81,0:27:27:0:0,0,15,12	0/1:111,0,64:23:19:14:4,0,7,12
Locus_2_Transcript_1374/4817_Confidence_1.000_Length_321	199	.	A	C	139	PASS	DP=69;VDB=0.00581863;SGB=-1.37985;RPB=0.861624;MQB=0.00469291;MQSB=0.606775;BQB=0.270171;MQ0F=0.0289855;ICB=0.3;HOB=0.125;AC=3;AN=4;DP4=4,0,19,23;MQ=14	GT:PL:DP:DV:SP:DP4	1/1:94,72,0:24:24:0:0,0,14,10	0/1:109,0,67:22:18:18:4,0,5,13
Locus_2_Transcript_1375/4817_Confidence_1.000_Length_711	226	.	G	A	136	PASS	DP=22;VDB=0.433664;SGB=-4.41425;RPB=0.180092;MQB=0.720273;MQSB=1;BQB=0.144386;MQ0F=0;ICB=0.3;HOB=0.125;AC=3;AN=4;DP4=7,0,7,1;MQ=39	GT:PL:DP:DV:SP:DP4	0/1:45,0,126:10:3:0:7,0,3,0	1/1:156,15,0:5:5:0:0,0,4,1
Locus_2_Transcript_1376/4817_Confidence_1.000_Length_315	122	.	C	T	84	PASS	DP=14;VDB=0.41447;SGB=-3.78882;RPB=0.279932;MQB=1.00775;BQB=0.895781;MQ0F=0;ICB=0.5;HOB=0.5;AC=2;AN=4;DP4=4,0,6,0;MQ=39	GT:PL:DP:DV:SP:DP4	0/1:116,0,53:7:5:0:2,0,5,0	0/1:31,0,52:3:1:0:2,0,1,0
Locus_2_Transcript_1378/4817_Confidence_1.000_Length_200	140	.	C	T	66	PASS	DP=34;VDB=0.000348658;SGB=-1.28266;RPB=0.167677;MQB=0.0119182;MQSB=0.996604;BQB=0.167677;MQ0F=0.0882353;ICB=0.3;HOB=0.125;AC=3;AN=4;DP4=4,0,10,6;MQ=18	GT:PL:DP:DV:SP:DP4	0/1:90,0,91:11:7:6:4,0,4,3	1/1:40,27,0:9:9:0:0,0,6,3
Locus_2_Transcript_1379/4817_Confidence_1.000_Length_248	132	.	A	G	113	PASS	DP=50;VDB=0.0191894;SGB=-6.56443;RPB=0.0852514;MQB=0.0475784;MQSB=0.389654;BQB=0.982731;MQ0F=0.06;ICB=0.5;HOB=0.5;AC=2;AN=4;DP4=11,4,12,3;MQ=30	GT:PL:DP:DV:SP:DP4	0/1:98,0,120:12:7:0:5,0,6,1	0/1:79,0,219:18:8:2:6,4,6,2
Locus_2_Transcript_1379/4817_Confidence_1.000_Length_248	146	.	A	G	65	PASS	DP=48;VDB=0.00611187;SGB=-5.02958;RPB=0.367774;MQB=0.0446882;MQSB=0.803696;BQB=0.847455;MQ0F=0.0833333;ICB=0.5;HOB=0.5;AC=2;AN=4;DP4=12,6,8,2;MQ=31	GT:PL:DP:DV:SP:DP4	0/1:117,0,122:11:6:3:5,0,4,2	0/1:13,0,253:17:4:6:7,6,4,0
Locus_2_Transcript_1379/4817_Confidence_1.000_Length_248	188	.	T	C	120	PASS	DP=32;VDB=0.00107784;SGB=-5.33677;RPB=0.961107;MQB=0.408591;MQSB=0.990132;BQB=0.0996187;MQ0F=0.09375;ICB=0.5;HOB=0.5;AC=2;AN=4;DP4=8,2,3,8;MQ=32	GT:PL:DP:DV:SP:DP4	0/1:119,0,107:9:5:8:4,0,2,3	0/1:65,0,135:12:6:6:4,2,1,5
Locus_2_Transcript_1384/4817_Confidence_1.000_Length_349	61	.	G	A	87	PASS	DP=54;VDB=7.67205e-08;SGB=-9.32613;RPB=0.206417;MQB=0.0050779;BQB=0.396248;MQ0F=0;ICB=0.3;HOB=0.125;AC=3;AN=4;DP4=10,0,24,0;MQ=20	GT:PL:DP:DV:SP:DP4	1/1:90,39,0:13:13:0:0,0,13,0	0/1:61,0,125:21:11:0:10,0,11,0
Locus_2_Transcript_1384/4817_Confidence_1.000_Length_349	88	.	C	T	118	PASS	DP=78;VDB=0.0740901;SGB=-7.485;RPB=0.932483;MQB=0.236649;BQB=0.302609;MQ0F=0.0384615;ICB=0.5;HOB=0.5;AC=2;AN=4;DP4=32,0,18,0;MQ=21	GT:PL:DP:DV:SP:DP4	0/1:49,0,62:18:6:0:12,0,6,0	0/1:132,0,118:32:12:0:20,0,12,0
Locus_2_Transcript_1390/4817_Confidence_1.000_Length_326	61	.	G	A	69	PASS	DP=27;VDB=0.0121514;SGB=-0.201796;RPB=0.148002;MQB=0.495715;BQB=0.206192;MQ0F=0;ICB=0.3;HOB=0.125;AC=3;AN=4;DP4=3,0,15,0;MQ=22	GT:PL:DP:DV:SP:DP4	1/1:42,6,0:2:2:0:0,0,2,0	0/1:92,0,33:16:13:0:3,0,13,0
Locus_2_Transcript_1390/4817_Confidence_1.000_Length_326	76	.	C	T	65	PASS	DP=35;VDB=0.00970842;SGB=-6.871;RPB=0.921087;MQB=0.0518584;BQB=0.542584;MQ0F=0;ICB=0.5;HOB=0.5;AC=2;AN=4;DP4=6,0,16,0;MQ=25	GT:PL:DP:DV:SP:DP4	0/1:30,0,56:4:2:0:2,0,2,0	0/1:98,0,58:18:14:0:4,0,14,0
Locus_2_Transcript_1390/4817_Confidence_1.000_Length_326	77	.	C	G	61	PASS	DP=35;VDB=0.0101891;SGB=-6.871;RPB=0.906807;MQB=0.0518584;BQB=0.542584;MQ0F=0;ICB=0.5;HOB=0.5;AC=2;AN=4;DP4=6,0,16,0;MQ=25	GT:PL:DP:DV:SP:DP4	0/1:30,0,56:4:2:0:2,0,2,0	0/1:94,0,58:18:14:0:4,0,14,0
Locus_2_Transcript_1390/4817_Confidence_1.000_Length_326	91	.	C	T	74	PASS	DP=38;VDB=0.0543834;SGB=0.389738;RPB=0.975507;MQB=0.0497619;BQB=0.241338;MQ0F=0;ICB=0.5;HOB=0.5;AC=2;AN=4;DP4=6,0,19,0;MQ=25	GT:PL:DP:DV:SP:DP4	0/1:30,0,61:4:2:0:2,0,2,0	0/1:107,0,49:21:17:0:4,0,17,0
Locus_2_Transcript_1390/4817_Confidence_1.000_Length_326	103	.	T	C	67	PASS	DP=40;VDB=0.112637;SGB=0.891673;RPB=0.997478;MQB=0.031522;BQB=0.233506;MQ0F=0;ICB=0.3;HOB=0.125;AC=3;AN=4;DP4=4,0,22,0;MQ=25	GT:PL:DP:DV:SP:DP4	0/1:30,0,65:4:2:0:2,0,2,0	1/1:99,2,0:22:20:0:2,0,20,0
Locus_2_Transcript_1390/4817_Confidence_1.000_Length_326	137	.	G	A	191	PASS	DP=52;VDB=0.624472;SGB=0.115056;RPB=0.825863;MQB=0.0468303;MQSB=0.629014;BQB=0.735671;MQ0F=0;ICB=0.5;HOB=0.5;AC=2;AN=4;DP4=4,3,25,3;MQ=28	GT:PL:DP:DV:SP:DP4	0/1:110,0,57:7:5:0:2,0,4,1	0/1:146,0,69:28:23:16:2,3,21,2
Locus_2_Transcript_1390/4817_Confidence_1.000_Length_326	144	.	T	C	180	PASS	DP=52;VDB=0.706746;SGB=-8.40555;RPB=0.272532;MQB=0.515166;MQSB=0.806164;BQB=0.423308;MQ0F=0;ICB=0.5;HOB=0.5;AC=2;AN=4;DP4=11,2,18,3;MQ=28	GT:PL:DP:DV:SP:DP4	0/1:97,0,74:7:4:0:3,0,3,1	0/1:147,0,136:27:17:2:8,2,15,2
Locus_2_Transcript_1390/4817_Confidence_1.000_Length_326	164	.	T	C,A	221	PASS	DP=49;VDB=0.100007;SGB=-0.42659;RPB=0.720273;MQB=0.114218;MQSB=0.976419;BQB=0.941512;MQ0F=0;ICB=0.36;HOB=0.625;AC=2,1;AN=4;DP4=2,1,20,4;MQ=32	GT:PL:DP:DV:SP:DP4	1/2:154,93,87,72,0,63:5:5:0:0,0,5,0	0/1:196,0,53,181,67,255:22:19:0:2,1,15,4
Locus_2_Transcript_1390/4817_Confidence_1.000_Length_326	206	.	C	T	298	PASS	DP=40;VDB=0.386223;SGB=0.204537;RPB=0.29625;MQB=0.0206651;MQSB=0.360729;BQB=0.966771;MQ0F=0;ICB=0.3;HOB=0.125;AC=3;AN=4;DP4=1,2,12,13;MQ=31	GT:PL:DP:DV:SP:DP4	0/1:107,0,50:6:4:4:0,2,3,1	1/1:255,24,0:22:21:0:1,0,9,12
Locus_2_Transcript_1390/4817_Confidence_1.000_Length_326	240	.	A	C	211	PASS	DP=27;VDB=0.00303804;SGB=-0.404597;RPB=0.702619;MQB=0.412795;MQSB=0.719681;BQB=0.951579;MQ0F=0;ICB=0.3;HOB=0.125;AC=3;AN=4;DP4=1,5,3,14;MQ=31	GT:PL:DP:DV:SP:DP4	1/1:92,9,0:3:3:0:0,0,0,3	0/1:183,0,109:20:14:0:1,5,3,11
Locus_2_Transcript_1390/4817_Confidence_1.000_Length_326	266	.	T	C	207	PASS	DP=15;VDB=0.000865317;SGB=-0.723184;MQSB=1;MQ0F=0;AC=4;AN=4;DP4=0,0,1,13;MQ=31	GT:PL:DP:DV:SP:DP4	1/1:92,9,0:3:3:0:0,0,0,3	1/1:169,33,0:11:11:0:0,0,1,10
Locus_2_Transcript_1391/4817_Confidence_1.000_Length_221	61	.	C	G	69	PASS	DP=22;VDB=0.00130969;SGB=7.05893;RPB=0.931063;MQB=0.951607;BQB=0.563599;MQ0F=0;ICB=1;HOB=0.5;AC=1;AN=2;DP4=3,0,14,0;MQ=27	GT:PL:DP:DV:SP:DP4	./.:0,0,0:0:0:0:0,0,0,0	0/1:131,0,31:17:14:0:3,0,14,0
Locus_2_Transcript_1391/4817_Confidence_1.000_Length_221	90	.	C	T	75	PASS	DP=34;VDB=0.00189816;SGB=8.40551;RPB=0.998439;MQB=0.926295;BQB=0.798516;MQ0F=0;ICB=1;HOB=0.5;AC=1;AN=2;DP4=3,0,16,0;MQ=26	GT:PL:DP:DV:SP:DP4	./.:0,0,0:0:0:0:0,0,0,0	0/1:138,0,25:19:16:0:3,0,16,0
Locus_2_Transcript_1391/4817_Confidence_1.000_Length_221	140	.	T	C	129	PASS	DP=31;VDB=0.00766948;SGB=7.7304;RPB=0.9;MQB=0.533333;MQSB=0.23541;BQB=0.8;MQ0F=0;ICB=1;HOB=0.5;AC=1;AN=2;DP4=2,0,12,3;MQ=27	GT:PL:DP:DV:SP:DP4	./.:0,0,0:0:0:0:0,0,0,0	0/1:191,0,12:17:15:0:2,0,12,3
Locus_2_Transcript_1391/4817_Confidence_1.000_Length_221	161	.	C	T	98	PASS	DP=23;VDB=0.0760875;SGB=4.00342;RPB=0.959189;MQB=0.377804;MQSB=0.988701;BQB=0.629416;MQ0F=0;ICB=1;HOB=0.5;AC=1;AN=2;DP4=2,7,4,4;MQ=27	GT:PL:DP:DV:SP:DP4	./.:0,0,0:0:0:0:0,0,0,0	0/1:158,0,106:17:8:5:2,7,4,4
Locus_2_Transcript_1392/4817_Confidence_1.000_Length_271	127	.	C	T	62	PASS	DP=27;VDB=0.295253;SGB=-0.809454;RPB=0.259823;MQB=0.0131237;MQSB=0.90252;BQB=0.90252;MQ0F=0.037037;ICB=0.3;HOB=0.125;AC=3;AN=4;DP4=4,0,9,4;MQ=21	GT:PL:DP:DV:SP:DP4	1/1:79,9,0:3:3:0:0,0,1,2	0/1:47,0,91:14:10:0:4,0,8,2
Locus_2_Transcript_1392/4817_Confidence_1.000_Length_271	129	.	C	A	62	PASS	DP=27;VDB=0.301225;SGB=-0.809454;RPB=0.193781;MQB=0.0131237;MQSB=0.90252;BQB=0.730444;MQ0F=0.037037;ICB=0.3;HOB=0.125;AC=3;AN=4;DP4=4,0,9,4;MQ=21	GT:PL:DP:DV:SP:DP4	1/1:79,9,0:3:3:0:0,0,1,2	0/1:47,0,91:14:10:0:4,0,8,2
Locus_2_Transcript_1412/4817_Confidence_1.000_Length_305	187	.	A	G	72	PASS	DP=16;VDB=0.538025;SGB=-0.88904;RPB=0.360295;MQB=0.184981;MQSB=0.8618;BQB=0.655816;MQ0F=0.0625;ICB=0.3;HOB=0.125;AC=3;AN=4;DP4=2,1,4,4;MQ=28	GT:PL:DP:DV:SP:DP4	0/1:4,0,72:5:2:0:2,1,2,0	1/1:133,18,0:6:6:0:0,0,2,4
Locus_2_Transcript_1418/4817_Confidence_1.000_Length_673	252	.	T	C	249	PASS	DP=110;VDB=0.366728;SGB=-12.3947;RPB=0.859513;MQB=0.00129821;MQSB=0.633688;BQB=0.754151;MQ0F=0.154545;ICB=0.5;HOB=0.5;AC=2;AN=4;DP4=23,24,22,12;MQ=17	GT:PL:DP:DV:SP:DP4	0/1:177,0,53:29:19:9:4,6,14,5	0/1:136,0,128:52:15:0:19,18,8,7
Locus_2_Transcript_1418/4817_Confidence_1.000_Length_673	273	.	C	T	68	PASS	DP=113;VDB=0.452489;SGB=10.2282;RPB=0.793261;MQB=0.984406;MQSB=0.041161;BQB=0.999199;MQ0F=0.106195;ICB=0.3;HOB=0.125;AC=1;AN=4;DP4=43,22,12,5;MQ=20	GT:PL:DP:DV:SP:DP4	0/1:132,0,159:37:17:0:13,7,12,5	0/0:0,135,255:45:0:0:30,15,0,0
Locus_2_Transcript_1418/4817_Confidence_1.000_Length_673	283	.	A	C	308	PASS	DP=114;VDB=0.32004;SGB=-1.38616;RPB=0.999486;MQB=0.17897;MQSB=0.0216923;BQB=0.36384;MQ0F=0.0877193;ICB=0.3;HOB=0.125;AC=3;AN=4;DP4=15,4,42,23;MQ=21	GT:PL:DP:DV:SP:DP4	1/1:213,20,0:40:35:2:4,1,20,15	0/1:159,0,126:44:30:0:11,3,22,8
Locus_2_Transcript_1418/4817_Confidence_1.000_Length_673	313	.	T	G	135	PASS	DP=120;VDB=0.0231771;SGB=-9.32613;RPB=0.623441;MQB=0.323129;MQSB=9.03725e-05;BQB=0.664819;MQ0F=0.0333333;ICB=0.5;HOB=0.5;AC=2;AN=4;DP4=52,19,13,11;MQ=24	GT:PL:DP:DV:SP:DP4	0/1:145,0,189:46:16:7:22,8,8,8	0/1:55,0,204:49:8:2:30,11,5,3
Locus_2_Transcript_1418/4817_Confidence_1.000_Length_673	364	.	A	G	106	PASS	DP=116;VDB=0.28277;SGB=-12.0878;RPB=0.0052452;MQB=0.000167085;MQSB=0.000345725;BQB=0.908755;MQ0F=0;ICB=0.5;HOB=0.5;AC=2;AN=4;DP4=35,21,24,9;MQ=27	GT:PL:DP:DV:SP:DP4	0/1:87,0,242:37:14:5:13,10,11,3	0/1:84,0,255:52:19:0:22,11,13,6
Locus_2_Transcript_1418/4817_Confidence_1.000_Length_673	406	.	G	A	363	PASS	DP=97;VDB=0.550965;SGB=-17.3043;RPB=0.890751;MQB=6.59984e-05;MQSB=0.627715;BQB=0.281356;MQ0F=0;ICB=0.5;HOB=0.5;AC=2;AN=4;DP4=14,6,40,10;MQ=31	GT:PL:DP:DV:SP:DP4	0/1:179,0,124:26:19:2:5,2,16,3	0/1:248,0,204:44:31:2:9,4,24,7
Locus_2_Transcript_1418/4817_Confidence_1.000_Length_673	415	.	C	T	334	PASS	DP=91;VDB=0.642839;SGB=-1.36972;RPB=0.421231;MQB=9.06495e-05;MQSB=0.290342;BQB=0.462993;MQ0F=0;ICB=0.5;HOB=0.5;AC=2;AN=4;DP4=10,5,33,14;MQ=30	GT:PL:DP:DV:SP:DP4	0/1:170,0,99:23:18:11:2,3,15,3	0/1:228,0,159:39:29:4:8,2,18,11
Locus_2_Transcript_1418/4817_Confidence_1.000_Length_673	420	.	A	G	131	PASS	DP=95;VDB=0.174303;SGB=-9.93983;RPB=0.844715;MQB=3.34287e-07;MQSB=0.260734;BQB=0.959635;MQ0F=0;ICB=0.5;HOB=0.5;AC=2;AN=4;DP4=23,15,19,7;MQ=30	GT:PL:DP:DV:SP:DP4	0/1:84,0,239:23:9:2:9,5,7,2	0/1:112,0,255:41:17:3:14,10,12,5
[truncated: 143,385 more rows]
